# Supplementary material for: Vision-related convergent gene losses reveal SERPINE3’s unknown role in the eye
Source: eLife. 2022 Jun 21;11:e77999. doi: 10.7554/eLife.77999 (PMC9355568; doi:10.7554/eLife.77999)
Supplement: Figure 1—source data 1. [file elife-77999-fig1-data1.xls]

## Sheet: Figure 1 - Source data 1
Figure 1 - Source data 1: Genome assemblies used in this study and visual acuity values of mammalian species
Species classified as having low-acuity vision are shown in italics. Visual acuity values marked by * are behavioral and preferable used if behavioral and calculated values were available for the same species. Visual acuity values were converted in [cyc/deg] with the following formula: [cyc/deg] = 60 / (2 x [min of arc]). Anatomical visual acuity was computed for pika and degu according to Veille…
Assembly Name	Assembly Accession	Scientific Species Name	Common Species Name	Visual Acuity	References for visual acuity value	Comments	# of lost genes with term "visual perception"
balAcu1	GCF_000493695.1	Balaenoptera acutorostrata scammoni	minke whale	4	Murayama1992	-	2
bisBis1	GCF_000754665.1	Bison bison bison	American bison	10.31	Veilleux2014	inferred from Bos taurus, same subfamily Bovinae	1
bosTau8	GCF_000003055.5	Bos taurus	cow	10.31	Veilleux2014	-	4
calJac3	GCF_000004665.1	Callithrix jacchus	white-tufted-ear marmoset	30	Troilo1993	-	3
camFer1	GCA_000311805.1	Camelus ferus	wild Bactrian camel	10 *	Harmann2001	inferred from Camelus bactrianus, same genus	2
canFam3	GCF_000002285.3	Canis lupus familiaris	dog	14.57	Veilleux2014	-	1
capHir1	GCF_000317765.1	Capra hircus	goat	8.43	Veilleux2014	-	6
cavPor3	GCF_000151735.1	Cavia porcellus	domestic guinea pig	2.7	Buttery1991	-	2
cerSim1	GCF_000283155.1	Ceratotherium simum simum	southern white rhinoceros	6	Pettigrew2008	inferred from Diceros bicornis (black rhino), same sub family Rhinocerotinae, same tribe Dicerotini	3
chlSab2	GCF_000409795.2	Chlorocebus sabaeus	green monkey	55.23	Veilleux2014	inferred from Chlorocebus aethiops, same genus	0
chrAsi1	GCF_000296735.1	Chrysochloris asiatica	Cape golden mole	0		set to 0 as functionally blind	17
conCri1	GCF_000260355.1	Condylura cristata	star-nosed mole	0		set to 0 as functionally blind	12
eptFus1	GCF_000308155.1	Eptesicus fuscus	big brown bat	0,5 *	Bell1986	-	7
equCab2	GCF_000002305.2	Equus caballus	horse	23,3 *	Timney1992	-	1
felCat8	GCF_000181335.2	Felis catus	domestic cat	8,85 *	Veilleux2014, Jacobson1976	-	1
hetGla2	GCF_000247695.1	Heterocephalus glaber	naked mole rat	0.44	Heffner1993	-	7
hg38	GCF_000001405.38	Homo sapiens	human	64 *	Veilleux2014, Spence1934	-	0
lepWed1	GCF_000349705.1	Leptonychotes weddellii	Weddell seal	3,61 *	Schustermann1972	inferred from Phoca vitulina, same family Phocidae	0
loxAfr3	GCF_000001905.1	Loxodonta africana	African savanna elephant	13.16	Pettigrew2010	-	1
macFas5	GCF_000364345.1	Macaca fascicularis	crab-eating macaque	46 *	Valois1974	-	0
micOch1	GCF_000317375.1	Microtus ochrogaster	prairie vole	0,5 *	Emerson1980	inferred from Mesocricetus auratus (golden hamster), same family Cricetidae	5
mm10	GCF_000001635.20	Mus musculus	house mouse	0,5 *	Prusky2000	-	1
musFur1	GCF_000215625.1	Mustela putorius furo	domestic ferret	3,57 *	Veilleux2014, Potenagel1980	-	4
myoDav1	GCF_000327345.1	Myotis davidii	David's myotis	0,2 *	Pettigrew1988	inferred from Nyctophilus gouldi, same family Vespertilionidae	9
myoLuc2	GCF_000147115.1	Myotis lucifugus	little brown bat	0,2 *	Pettigrew1988	inferred from Nyctophilus gouldi, same family Vespertilionidae	7
nanGal1	GCF_000622305.1	Nannospalax galili	Upper Galilee mountains blind mole rat	0		set to 0 as functionally blind	16
ochPri3	GCF_000292845.1	Ochotona princeps	American pika	3.66	Akaishi1995,Franken2004	computed for Ochotona rufescens	0
octDeg1	GCF_000260255.1	Octodon degus	degu	2.83	Vega-Zuniga2013	computed	2
odoRosDiv1	GCF_000321225.1	Odobenus rosmarus divergens	Pacific walrus	3.8	Mass1992	-	2
orcOrc1	GCF_000331955.2	Orcinus orca	killer whale	5,45 *	White1971	converted from 5.5 min of arc	2
oryCun2	GCF_000003625.2	Oryctolagus cuniculus	rabbit	3 *	VanHof1967	-	1
otoGar3	GCF_000181295.1	Otolemur garnettii	bush baby (small-eared galago)	6 *	Langston1986	inferred from Otolemur crassicaudatus, same genus	2
panHod1	GCF_000400835.1	Pantholops hodgsonii	Tibetan antelope (chiru)	8.43	Veilleux2014	inferred from Capra hircus, same family Bovidae	1
panPan1	GCF_000258655.1	Pan paniscus	bonobo (pygmy chimpanzee)	64,3 *	Spence1934	inferred from Pan troglodytes, same genus	1
panTro4	GCF_000001515.5	Pan troglodytes	chimpanzee	64,28 *	Spence1934	-	0
papAnu2	GCF_000264685.1	Papio anubis	olive baboon	53,6 *	Cowey1967	inferred from Macaca mulatta, same tribe Papionini	1
perManBai1	GCF_000500345.1	Peromyscus maniculatus bairdii	prairie deer mouse	0.56	Rahmann1968, Veilleux2014	-	3
ponAbe2	WUGSC 2.0.2	Pongo abelii	Sumatran orangutan	64,28 *	Spence1934	inferred from Pan troglodytes, same family Hominidae	1
pteAle1	GCF_000325575.1	Pteropus alecto	black flying fox	1,67 *	Neuweiler1962	inferred from Pteropus giganteus; converted from 18 min of arc, same genus	1
pteVam1	GCA_000151845.1	Pteropus vampyrus	large flying fox	1,67 *	Neuweiler1962	inferred from Pteropus giganteus; converted from 18 min of arc, same genus	0
rheMac3	GCA_000230795.1	Macaca mulatta	Rhesus monkey	53,6 *	Cowey1967	-	2
rhiRox1	GCF_000769185.1	Rhinopithecus roxellana	golden snub-nosed monkey	53,6 *	Cowey1967	inferred from Macaca mulatta, same family Cercopithecidae	0
rn6	GCF_000001895.5	Rattus norvegicus	Norway rat	1,6 *	Seymoure1997	-	2
saiBol1	GCF_000235385.1	Saimiri boliviensis boliviensis	Bolivian squirrel monkey	40.54	Rolls1970, Cowey1967	inferred from Saimiri sciureus; converted from 0.74 min of arc, same genus	2
speTri2	GCF_000236235.1	Ictidomys tridecemlineatus	thirteen-lined ground squirrel	3,9 *	Jacobs1982	inferred from Sciurus (tree squireels), same family Sciuridae	3
tarSyr2	GCF_000164805.1	Carlito syrichta	Philippine tarsier	8.89	Veilleux2009	-	3
triMan1	GCF_000243295.1	Trichechus manatus latirostris	Florida manatee	1,43 *	Bauer2003	converted from 21 min of arc	6
turTru2	GCF_000151865.1	Tursiops truncatus	common bottlenose dolphin	5 *	Spong1971	inferred from Lagenorhynchus obliquidens, same family Delphinidae; converted from 6 min of arc	2
vicPac2	GCF_000164845.1	Vicugna pacos	alpaca	13.4	Wang2015	-	1
Reference key	Citation	PMID
Akaishi1995	Akaishi Y, Uchiyama H, Ito H, Shimizu Y. A morphological study of the retinal ganglion cells of the Afghan pika (Ochotona rufescens). Neurosci Res. 1995 Mar;22(1):1-12. doi: 10.1016/0168-0102(94)00873-e. PMID: 7792074.	PMID: 7792074
Bauer2003	Bauer G B., Colbert D E, Gaspard III J C, Littlefield B and Fellner W. Underwater visual acuity of Florida manatees (Trichechus manatus latirostris). 2003 International Journal of Comparative Psychology 16:130-142	https://escholarship.org/uc/item/52h2x26v
Bell1986	Bell, G. P., & Fenton, M. B. (1986). Visual acuity, sensitivity and binocularity in a gleaning insectivorous bat, Macrotus californicus (Chiroptera: Phyllostomidae). Animal Behaviour, 34(2), 409–414.	https://doi.org/10.1016/S0003-3472(86)80110-5
Buttery1991	Robert G. ButterHinrichsen C.F.L., Weller W. L. and Haight J. R. (1991). How thick should a retina be? A comparative study of mammalian species with and without intraretinal vasculature. Vision Research 31:169–187	PMID: 2017880
Cowey1967	Cowey A, Ellis CM. Visual acuity of rhesus and squirrel monkeys. Journal of Comparative and Physiological Psychology. 1967 Aug;64(1):80-84. DOI: 10.1037/h0024821. PMID: 4965051.	PMID: 4965051
Emerson1980	Emerson VF. Grating acuity of the golden hamster. The effects of stimulus orientation and luminance. Exp Brain Res. 1980;38(1):43-52. doi: 10.1007/BF00237929. PMID: 7351226.	PMID: 7351226
Franken2004	Franken R J, and Hik D S. (2004) Influence of habitat quality, patch size and connectivity on colonization and extinction dynamics of collared pikas Ochotona collaris. Journal of Animal Ecology. 73.5: 889-896.	https://doi.org/10.1111/j.0021-8790.2004.00865.x
Harmann2001	Harman A, Dann J, Ahmat A, Macuda T, Johnston K, Timney B. The retinal ganglion cell layer and visual acuity of the camel. Brain Behav Evol. 2001;58(1):15-27. doi: 10.1159/000047258. PMID: 11799275.	PMID: 11799275
Heffner1993	Heffner RS, Heffner HE. Degenerate hearing and sound localization in naked mole rats (Heterocephalus glaber), with an overview of central auditory structures. J Comp Neurol. 1993 May 15;331(3):418-33. doi: 10.1002/cne.903310311. PMID: 8514919.	PMID: 8514919
Jacobs1982	Jacobs G H, Birch D G and Blakeslee B (1982). Visual acuity and spatial contrast sensitivity in tree squirrels. Behav Processes. 7:367-75	https://doi.org/10.1111/j.0021-8790.2004.00865.x
Jacobson1976	Jacobson SG, Franklin KB, McDonald WI. Visual acuity of the cat. Vision Res. 1976;16(10):1141-3. doi: 10.1016/0042-6989(76)90254-6. PMID: 969226.	PMID: 969226
Kemp2014	Kemp AD, Christopher Kirk E. Eye size and visual acuity influence vestibular anatomy in mammals. Anat Rec (Hoboken). 2014 Apr;297(4):781-90. doi: 10.1002/ar.22892. Epub 2014 Feb 13. PMID: 24591307.	PMID: 24591307
Langston1986	Langston A, Casagrande VA, Fox R. Spatial resolution of the Galago. Vision Res. 1986;26(5):791-6. doi: 10.1016/0042-6989(86)90094-5. PMID: 3750860.	PMID: 3750860
Mass1992	Mass A.M. (1992) Retinal Topography in the Walrus (Odobenus RosmarusDivergence) and Fur Seal (Callorhinus Ursinus). In: Thomas J.A., Kastelein R.A., Supin A.Y. (eds) Marine Mammal Sensory Systems. Springer, Boston, MA. https://doi.org/10.1007/978-1-4615-3406-8_7	https://doi.org/10.1007/978-1-4615-3406-8_7
Murayama1992	Murayama T., Somiya H., Aoki I. and Ishii T. (1992) The Distribution of Ganglion Cells in the Retina and Visual Acuity of Minke Whale. Nippon Suisan Gakkaishi 58:1057-1061	DOI:10.2331/suisan.58.1057
Neuweiler1962	Neuweiler, G. (1962). Bau und Leistung des Flughundauges (Pteropus giganteus gig. Brünn.). Journal of Comparative Physiology A: Neuroethology, Sensory, Neural, and Behavioral Physiology 46:13-56	DOI: 10.1007/bf00340352
Pettigrew1988	Pettigrew JD, Dreher B, Hopkins CS, McCall MJ, Brown M. Peak density and distribution of ganglion cells in the retinae of microchiropteran bats: implications for visual acuity. Brain Behav Evol. 1988;32(1):39-56. doi: 10.1159/000116531. PMID: 3191381.	PMID: 3191381
Pettigrew2008	Pettigrew JD, Manger PR. Retinal ganglion cell density of the black rhinoceros (Diceros bicornis): calculating visual resolution. Vis Neurosci. 2008 Mar-Apr;25(2):215-20. doi: 10.1017/S0952523808080498. PMID: 18442443.	PMID: 18442443
Pettigrew2010	Pettigrew JD, Bhagwandin A, Haagensen M, Manger PR. Visual acuity and heterogeneities of retinal ganglion cell densities and the tapetum lucidum of the African elephant (Loxodonta africana). Brain Behav Evol. 2010;75(4):251-61. doi: 10.1159/000314898. Epub 2010 Jun 28. PMID: 20587993.	PMID: 20587993
Potenagel1980	Pontenagel VT, Schmidt U. Untersuchungen zur Leistungsfähigkeit des Gesichtssinnes beim Frettchen, Mustela putorius f. furo 1980; L. Z. Säugetierkunde	https://www.biodiversitylibrary.org/part/191512
Prusky2000	Prusky GT, West PW, Douglas RM. Behavioral assessment of visual acuity in mice and rats. Vision Res. 2000;40(16):2201-9. doi: 10.1016/s0042-6989(00)00081-x. PMID: 10878281.	PMID: 10878281
Rahmann1968	Rahmann H, Rahmann M, King John A. Comparative visual acuity (minimum separable) in five species and subspecies of deermice (Peromyscus). Physiol Zool 1968; 41:298–312. https://doi.org/10.1086/physzool.41.3.30155463	https://www.journals.uchicago.edu/action/showCitFormats?doi=10.1086%2Fphyszool.41.3.30155463
Rolls1970	Rolls ET, Cowey A. Topography of the retina and striate cortex and its relationship to visual acuity in rhesus monkeys and squirrel monkeys. Exp Brain Res. 1970;10(3):298-310. doi: 10.1007/BF00235053. PMID: 4986000.	PMID: 4986000
Schustermann1972	Schustermann R J. (1972). Chapter: VISUAL ACUITY IN PINNIPEDS. In Behavior of marine animals (pp. 469-492). Springer US.	https://doi.org/10.1007/978-1-4684-0910-9_8
Seymoure1997	Seymoure P, Juraska JM. Vernier and grating acuity in adult hooded rats: the influence of sex. Behav Neurosci. 1997 Aug;111(4):792-800. doi: 10.1037//0735-7044.111.4.792. PMID: 9267656.	PMID: 9267656
Spence1934	Spence, K. W. (1934). Visual acuity and its relation to brightness in chimpanzee and man. Journal of Comparative Psychology, 18(3), 333–361.	https://doi.org/10.1037/h0075291
Spong1971	Spong P, White D. Visual acuity and discrimination learning in the dolphin (Lagenorhynchus obliquidens). Exp Neurol. 1971 Jun;31(3):431-6. doi: 10.1016/0014-4886(71)90245-7. PMID: 5567462.	PMID: 5567462
Timney1992	Timney B, Keil K. Visual acuity in the horse. Vision Res. 1992 Dec;32(12):2289-93. doi: 10.1016/0042-6989(92)90092-w. PMID: 1288005.	PMID: 1288005
Troilo1993	Troilo D, Howland HC, Judge SJ. Visual optics and retinal cone topography in the common marmoset (Callithrix jacchus). Vision Res. 1993 Jul;33(10):1301-10. doi: 10.1016/0042-6989(93)90038-x. PMID: 8333154.	PMID: 8333154
Valois1974	De Valois RL, Morgan H, Snodderly DM. Psychophysical studies of monkey vision. 3. Spatial luminance contrast sensitivity tests of macaque and human observers. Vision Res. 1974 Jan;14(1):75-81. doi: 10.1016/0042-6989(74)90118-7. Erratum in: Vision Res. 2014 Sep;102:97. PMID: 4204839.	PMID: 4204839
VanHof1967	van Hof MW. Visual acuity in the rabbit. Vision Res. 1967 Sep;7(9):749-51. doi: 10.1016/0042-6989(67)90037-5. PMID: 5608663.	PMID: 5608663
Vega-Zuniga2013	Vega-Zuniga T, Medina FS, Fredes F, Zuniga C, Severín D, Palacios AG, Karten HJ, Mpodozis J. Does nocturnality drive binocular vision? Octodontine rodents as a case study. PLoS One. 2013 Dec 31;8(12):e84199. doi: 10.1371/journal.pone.0084199. PMID: 24391911; PMCID: PMC3877236.	PMID: 24391911
Veilleux2009	Veilleux CC, Kirk EC. Visual acuity in the cathemeral strepsirrhine Eulemur macaco flavifrons. Am J Primatol. 2009 Apr;71(4):343-52. doi: 10.1002/ajp.20665. PMID: 19180555.	PMID: 19180555
Veilleux2014	Veilleux CC, Kirk EC. Visual acuity in mammals: effects of eye size and ecology. Brain Behav Evol. 2014;83(1):43-53. doi: 10.1159/000357830. Epub 2014 Feb 28. PMID: 24603494.	PMID: 24603494
Wang2015	Wang HH, Gallagher SK, Byers SR, Madl JE, Gionfriddo JR. Retinal ganglion cell distribution and visual acuity in alpacas (Vicugna pacos). Vet Ophthalmol. 2015 Jan;18(1):35-42. doi: 10.1111/vop.12131. Epub 2013 Dec 10. PMID: 24320877.	PMID: 24320877
White1971	White DO, Cameron N, Spong P, Bradford J. Visual acuity of the killer whale (Orcinus orca). Exp Neurol. 1971 Aug;32(2):230-6. doi: 10.1016/0014-4886(71)90066-5. PMID: 5567070.	PMID: 5567070
