# Supplementary material for: Vision-related convergent gene losses reveal SERPINE3’s unknown role in the eye
Source: eLife. 2022 Jun 21;11:e77999. doi: 10.7554/eLife.77999 (PMC9355568; doi:10.7554/eLife.77999)
Supplement: Figure 1—source data 2. [file elife-77999-fig1-data2.xls]

## Sheet: Figure 1 - Source data 2
Figure 1 - Source data 2: List of candidate genes of the forward genomics screen based on visual acuity < 1 including a short description
Genes shown in italics do not have a characterized function in eye phsiology and disease but are of special interest since expression data or GWAS studies hint at a role in eye. The candidate set with the phenotype defined based on visual acuity <1 also included two genes that not included in the current Ensembl gene set (gray). One of them, ENSG00000279362/DKFZP686J19100 overlaps with the candid…
Gene symbol	P-value in Forward Genomics screen	Corrected P-value	Filter: P-value in Forward Genomics screen < 0.05	#Low-acuity species	#High-acuity species	#Losses in low-acuity species	Low-acuity species that have lost the gene	#Losses in high-acuity species	High-acuity species with losses	#Losses in low-acuity lineages	Filter: Loss > 2 low-acuity lineages	Expression in human eye (eyeIntegration atlas)	Associated diseases (OMIM)	RNA Tissue expression cluster bulk, Single cell (Human protein atlas)	Function (UniProt)	Eye association if no OMIM eye diseases association exist
TSACC	8.55083e-11	1.12631e-06	YES	9	36	5	hetGla2;myoDav1;myoLuc2;conCri1;chrAsi1	0	NA	4	YES	FALSE	-	Testis - Spermatogenesis, Spermatids - Spermatogenesis	Chaperone	differential expression in retinal ganglion cells after increase of ocular pressure (Park 2019)		Reference key	Citation	PMID
SERPINE3	3.00014e-10	1.45706e-06	YES	10	34	7	nanGal1;hetGla2;eptFus1;myoDav1;myoLuc2;conCri1;chrAsi1	0	NA	5	YES	TRUE	-	Brain - Unknown function , Spermatocytes - Spermatogenesis , Tissue enhanced (brain, pancreas, retina)	Protease inhibitor, Serine protease inhibitor	this study and references within		Corbo	Corbo JC, Lawrence KA, Karlstetter M, Myers CA, Abdelaziz M, Dirkes W, Weigelt K, Seifert M, Benes V, Fritsche LG, Weber BH, Langmann T. CRX ChIP-seq reveals the cis-regulatory architecture of mouse photoreceptors. Genome Res. 2010 Nov;20(11):1512-25. doi: 10.1101/gr.109405.110. Epub 2010 Aug 6. PMID: 20693478; PMCID: PMC2963815.	PMID: 20693478
GUCA1B	3.31853e-10	1.45706e-06	YES	10	32	3	hetGla2;conCri1;chrAsi1	0	NA	3	YES	TRUE	Retinitis Pigmentosa 48	Retina - Phototransduction, Photoreceptor cells - Phototransduction	Guanylyl cyclase	NA		Park	Park YH, Snook JD, Ostrin EJ, Kim S, Chen R, Frankfort BJ. Transcriptomic profiles of retinal ganglion cells are defined by the magnitude of intraocular pressure elevation in adult mice. Sci Rep. 2019 Feb 22;9(1):2594. doi: 10.1038/s41598-019-39141-1. PMID: 30796289; PMCID: PMC6385489.	PMID: 30796289
CRYBA4	6.07772e-09	2.00139e-05	YES	10	35	4	myoDav1;myoLuc2;conCri1;chrAsi1	0	NA	3	YES	FALSE	Cataract 23	Epididymis - Antimicrobial activity, Spermatids - Flagellum & Golgi organization	Eye lens protein	NA		Friedman	Friedman JS, Faucher M, Hiscott P, Biron VL, Malenfant M, Turcotte P, Raymond V, Walter MA. Protein localization in the human eye and genetic screen of opticin. Hum Mol Genet. 2002 May 15;11(11):1333-42. doi: 10.1093/hmg/11.11.1333. PMID: 12019215.	PMID: 12019215
SGK494/RSKR	9.06951e-09	2.04182e-05	YES	10	37	4	nanGal1;hetGla2;conCri1;chrAsi1	0	NA	4	YES	TRUE	-	Retina - Visual perception, Syncytiotrophoblasts - Pregnancy hormone signaling	NA	differential expression during transition of RPE cells to mesenchymal cells (Radeke 2015)		Reardon	Reardon AJ, Le Goff M, Briggs MD, McLeod D, Sheehan JK, Thornton DJ, Bishop PN. Identification in vitreous and molecular cloning of opticin, a novel member of the family of leucine-rich repeat proteins of the extracellular matrix. J Biol Chem. 2000 Jan 21;275(3):2123-9. doi: 10.1074/jbc.275.3.2123. PMID: 10636917.	PMID: 10636917
LACTBL1	9.30072e-09	2.04182e-05	YES	8	20	3	nanGal1;hetGla2;chrAsi1	0	NA	3	YES	FALSE	-	Retina - Phototransduction, Bipolar cells - Visual perception	NA	rs10158878 20 kbp downstream, intergenic, in LD with LACTBL1 associated with refractive error (GWAS catalog), Human protein atlas: Cell type enriched (Bipolar cells), tissue enriched (retina)		Ogden	Ogden AT, Nunes I, Ko K, Wu S, Hines CS, Wang AF, Hegde RS, Lang RA. GRIFIN, a novel lens-specific protein related to the galectin family. J Biol Chem. 1998 Oct 30;273(44):28889-96. doi: 10.1074/jbc.273.44.28889. PMID: 9786891.	PMID: 9786891
C10orf90	5.94519e-07	0.00104882	YES	9	34	1	myoDav1	0	NA	1	NO							Barton	Barton KA, Hsu CD, Petrash JM. Interactions between small heat shock protein alpha-crystallin and galectin-related interfiber protein (GRIFIN) in the ocular lens. Biochemistry. 2009 May 12;48(18):3956-66. doi: 10.1021/bi802203a. PMID: 19296714; PMCID: PMC3615986.	PMID: 19296714
DKFZP686J19100	6.37003e-07	0.00104882	YES	10	36	6	nanGal1;hetGla2;eptFus1;myoDav1;myoLuc2;chrAsi1	2	turTru2;orcOrc1	4	YES	NA	-	NA	NA	-		Chiang	Chiang CY, Ching YH, Chang TY, Hu LS, Yong YS, Keak PY, Mustika I, Lin MD, Liao BY. Novel eye genes systematically discovered through an integrated analysis of mouse transcriptomes and phenome. Comput Struct Biotechnol J. 2019 Dec 27;18:73-82. doi: 10.1016/j.csbj.2019.12.009. PMID: 31934309; PMCID: PMC6951830.	PMID: 31934309
ZNF483	1.64373e-06	0.00224597	YES	8	38	2	hetGla2;chrAsi1	0	NA	2	NO							Audo	Audo I, Bujakowska KM, Léveillard T, Mohand-Saïd S, Lancelot ME, Germain A, Antonio A, Michiels C, Saraiva JP, Letexier M, Sahel JA, Bhattacharya SS, Zeitz C. Development and application of a next-generation-sequencing (NGS) approach to detect known and novel gene defects underlying retinal diseases. Orphanet J Rare Dis. 2012 Jan 25;7:8. doi: 10.1186/1750-1172-7-8. PMID: 22277662; PMCID: PMC33521…	PMID: 22277662
PKD1L2	1.80455e-06	0.00224597	YES	9	34	6	nanGal1;hetGla2;eptFus1;myoDav1;myoLuc2;chrAsi1	4	turTru2;orcOrc1;balAcu1;odoRosDiv1	4	YES	TRUE	-	NA	Ion channel regulator, GPCR	International Mouse Phenotyping Consortium identified abnormal lens morphology in KO (MGI Ref. # J:211773), differential expression during transition of RPE cells to mesenchymal cells (Radeke 2015), rs873693 is associated with age onset of myopia (GWAS catalog, Tedja 2018)		Rovsing	Rovsing L, Clokie S, Bustos DM, et al. Crx broadly modulates the pineal transcriptome. Journal of Neurochemistry. 2011 Oct;119(2):262-274. DOI: 10.1111/j.1471-4159.2011.07405.x. PMID: 21797868; PMCID: PMC3422619.	PMID: 21797868
SAPCD1	1.87562e-06	0.00224597	YES	10	37	7	nanGal1;hetGla2;eptFus1;myoDav1;myoLuc2;conCri1;chrAsi1	0	NA	5	YES	TRUE	-	Skin - Epidermis development , Ciliated cells - Cilium organization	NA	rs6905572 causes missense mutation in SAPCD1 and is associated with Macular degeneration (dbGaP), dbGaP studies list 6 studies associating SAPCD1 with Macular Degeneration		Radeke	Radeke MJ, Radeke CM, Shih YH, et al. Restoration of mesenchymal retinal pigmented epithelial cells by TGFβ pathway inhibitors: implications for age-related macular degeneration. Genome Medicine. 2015 ;7(1):58. DOI: 10.1186/s13073-015-0183-x. PMID: 26150894; PMCID: PMC4491894.	PMID: 26150894
OPTC	2.74703e-06	0.00261532	YES	10	33	5	eptFus1;myoDav1;myoLuc2;conCri1;chrAsi1	2	loxAfr3;triMan1	3	YES	FALSE	-	No cluster assigned, Spermatocytes & Spermatogonia - Spermatogenesis	Inhibits angiogensis in virteous humour	contained in virtous fibrils (Friedman 2002, Reardon 2000 and others)		De Maria	De Maria A, Bassnett S. Birc7: A Late Fiber Gene of the Crystalline Lens. Invest Ophthalmol Vis Sci. 2015 Jul;56(8):4823-34. doi: 10.1167/iovs.15-16968. PMID: 26218911; PMCID: PMC4520384.	PMID: 26218911
AF165138.7	2.7492e-06	0.00261532	YES	10	38	8	perManBai1;nanGal1;hetGla2;eptFus1;myoDav1;myoLuc2;conCri1;chrAsi1	1	cavPor3	6	YES	NA	-	NA	NA	NA		Tedja	Tedja MS, Wojciechowski R, Hysi PG, Eriksson N, Furlotte NA, Verhoeven VJM, Iglesias AI, Meester-Smoor MA, Tompson SW, Fan Q, Khawaja AP, Cheng CY, Höhn R, Yamashiro K, Wenocur A, Grazal C, Haller T, Metspalu A, Wedenoja J, Jonas JB, Wang YX, Xie J, Mitchell P, Foster PJ, Klein BEK, Klein R, Paterson AD, Hosseini SM, Shah RL, Williams C, Teo YY, Tham YC, Gupta P, Zhao W, Shi Y, Saw WY, Tai ES, Si…	PMID: 29808027
CRB1	2.77972e-06	0.00261532	YES	9	33	5	hetGla2;eptFus1;myoLuc2;conCri1;chrAsi1	0	NA	4	YES	TRUE	Retinitis Pigmentosa 12	Retina - Visual perception, Astrocytes - Nervous system maintenance	Photoreceptor morphogenesis	NA		Shelley	Shelley J, Dedek K, Schubert T, Feigenspan A, Schultz K, Hombach S, Willecke K, Weiler R. Horizontal cell receptive fields are reduced in connexin57-deficient mice. Eur J Neurosci. 2006 Jun;23(12):3176-86. doi: 10.1111/j.1460-9568.2006.04848.x. PMID: 16820008.	PMID: 16820008
IGIP	3.6831e-06	0.00323425	YES	10	38	0	NA	0	NA	0	NO							Hirano	Hirano AA, Liu X, Brecha NC, Barnes S. Analysis of Feedback Signaling from Horizontal Cells to Photoreceptors in Mice. Methods Mol Biol. 2018;1753:179-189. doi: 10.1007/978-1-4939-7720-8_12. PMID: 29564789.	PMID: 29564789
TRIT1	4.0588e-06	0.00334141	YES	9	37	0	NA	0	NA	0	NO							Zhang	Zhang N, Tsybovsky Y, Kolesnikov AV, Rozanowska M, Swider M, Schwartz SB, Stone EM, Palczewska G, Maeda A, Kefalov VJ, Jacobson SG, Cideciyan AV, Palczewski K. Protein misfolding and the pathogenesis of ABCA4-associated retinal degenerations. Hum Mol Genet. 2015 Jun 1;24(11):3220-37. doi: 10.1093/hmg/ddv073. Epub 2015 Feb 24. PMID: 25712131; PMCID: PMC4424957.	PMID: 25712131
GJA10	4.84286e-06	0.00375237	YES	10	34	7	nanGal1;hetGla2;eptFus1;myoDav1;myoLuc2;conCri1;chrAsi1	1	lepWed1	5	YES	FALSE	-	No cluster assigned, Horizontal cells - Visual perception	Gap junction protein	mediates coupling of horizontal cells (Shelley 2006, Hirano 2018 and others)		Busskamp	Busskamp V, Krol J, Nelidova D, Daum J, Szikra T, Tsuda B, Jüttner J, Farrow K, Scherf BG, Alvarez CP, Genoud C, Sothilingam V, Tanimoto N, Stadler M, Seeliger M, Stoffel M, Filipowicz W, Roska B. miRNAs 182 and 183 are necessary to maintain adult cone photoreceptor outer segments and visual function. Neuron. 2014 Aug 6;83(3):586-600. doi: 10.1016/j.neuron.2014.06.020. Epub 2014 Jul 4. PMID: 2500…	PMID: 25002228
TMEM138	6.19476e-06	0.00453319	YES	10	38	0	NA	0	NA	0	NO							Hoppe	Hoppe G, Yoon S, Gopalan B, Savage AR, Brown R, Case K, Vasanji A, Chan ER, Silver RB, Sears JE. Comparative systems pharmacology of HIF stabilization in the prevention of retinopathy of prematurity. Proc Natl Acad Sci U S A. 2016 May 3;113(18):E2516-25. doi: 10.1073/pnas.1523005113. Epub 2016 Apr 18. PMID: 27091985; PMCID: PMC4983815.	PMID: 27091985
GSG1	8.71969e-06	0.00587356	YES	10	37	1	conCri1	0	NA	1	NO							Andzelm	Andzelm MM, Cherry TJ, Harmin DA, Boeke AC, Lee C, Hemberg M, Pawlyk B, Malik AN, Flavell SW, Sandberg MA, Raviola E, Greenberg ME. MEF2D drives photoreceptor development through a genome-wide competition for tissue-specific enhancers. Neuron. 2015 Apr 8;86(1):247-63. doi: 10.1016/j.neuron.2015.02.038. Epub 2015 Mar 19. PMID: 25801704; PMCID: PMC4393375.	PMID: 25801704
RTBDN	9.15504e-06	0.00587356	YES	10	36	2	conCri1;chrAsi1	0	NA	2	NO
RBP3	9.51086e-06	0.00587356	YES	5	36	2	nanGal1;eptFus1	0	NA	2	NO
SPAG6	9.81007e-06	0.00587356	YES	7	36	4	nanGal1;hetGla2;eptFus1;myoLuc2	2	cavPor3;octDeg1	3	YES	TRUE	-	Ciliated cells - Cilium organization , Spermatocytes - Spermatogenesis	Important for structural integrity of the central apparatus in the sperm tail and for flagellar motility.	-
PDE6H	1.22509e-05	0.00701606	YES	10	34	1	nanGal1	0	NA	1	NO
HRSP12	1.38459e-05	0.00759911	YES	10	37	0	NA	0	NA	0	NO
IL22RA2	1.6225e-05	0.00854864	YES	10	37	0	NA	0	NA	0	NO
C12orf43	1.77098e-05	0.00864148	YES	9	36	0	NA	0	NA	0	NO
CLEC2B	1.77133e-05	0.00864148	YES	6	31	3	hetGla2;conCri1;chrAsi1	1	octDeg1	3	YES	TRUE	-	Bone marrow - Differentiation , Respiratory epithelial cells - Mucosal defense	Lectin	-
CRYBB3	1.88707e-05	0.00866159	YES	9	33	3	myoDav1;conCri1;chrAsi1	0	NA	3	YES	FALSE	Cataract 22	Liver - Oxidoreductase activity , Proximal tubular cells - Tubular reabsorption , Cell type enhanced (Proximal tubular cells, granulocytes, Muller glia cells, Distal enterocytes, Distal tubular cells)	Eye lens protein	NA
ARR3	1.97109e-05	0.00866159	YES	9	36	7	micOch1;nanGal1;hetGla2;eptFus1;myoDav1;conCri1;chrAsi1	3	cavPor3;loxAfr3;triMan1	6	YES	TRUE	Myopia 26	Retina - Phototransduction, Photoreceptor cells - Phototransduction	Binds opsin, signal transduction	NA
CRYBA1	1.97273e-05	0.00866159	YES	9	37	3	nanGal1;conCri1;chrAsi1	0	NA	3	YES	FALSE	Cataract 10	Brain - Unknown function , Syncytiotrophoblasts - Pregnancy hormone signaling	Eye lens protein	NA
ASB12	2.30104e-05	0.00947471	YES	10	36	0	NA	0	NA	0	NO
ZNF34	2.30178e-05	0.00947471	YES	6	26	2	mm10;nanGal1	0	NA	2	NO
DPPA3	2.42966e-05	0.00959724	YES	6	24	1	mm10	0	NA	1	NO
MIP	2.47727e-05	0.00959724	YES	10	38	2	conCri1;chrAsi1	0	NA	2	NO
GRIFIN	2.86306e-05	0.0103775	YES	7	32	3	nanGal1;eptFus1;chrAsi1	0	NA	3	YES	FALSE	-	Skin - Unknown function , Astrocytes - Nervous system maintenance	NA	lens protein (Ogden 1998, Barton 2009 and others)
LRIT2	2.87928e-05	0.0103775	YES	10	35	7	nanGal1;hetGla2;eptFus1;myoDav1;myoLuc2;conCri1;chrAsi1	3	cerSim1;loxAfr3;triMan1	5	YES	TRUE	-	Retina - Phototransduction, Photoreceptor cells - Phototransduction	NA	reported as novel eye gene in Chiang 2019 with KO in zf leading to a reduction in eye size, reported as candidate retinal disease gene with differential expression in Rd mouse in Audo 2012; paralog LRIT1 is a synaptic modulator in cone cells, SNPs rs12217769 (missense variant, macular thickness), rs4517452 (35.7 kbp upstream, intergenic, LD<0.4 r2/unclear linkage, abnormality in refraction) and r…
UTS2	2.91503e-05	0.0103775	YES	9	38	2	hetGla2;conCri1	0	NA	2	NO
EFCAB6	3.05594e-05	0.0105929	YES	6	31	2	nanGal1;hetGla2	1	orcOrc1	2	NO
SIKE1	3.2463e-05	0.0108193	YES	8	36	0	NA	0	NA	0	NO
CRYGS	3.28554e-05	0.0108193	YES	10	37	3	nanGal1;conCri1;chrAsi1	0	NA	3	YES	TRUE	Cataract 20	Non-specific - Unknown function , Cardiomyocytes - Nuclear processes	Eye lens protein	NA
MAGEB1	4.38192e-05	0.0140777	YES	8	33	4	nanGal1;hetGla2;myoDav1;myoLuc2	1	ochPri3	3	YES	FALSE	-	Testis - Spermatid development , Spermatogonia & Spermatocytes - Spermatogenesis	Tumor antigen	-
CCL28	4.74166e-05	0.0143745	YES	9	36	0	NA	0	NA	0	NO
ZNF529	4.76933e-05	0.0143745	YES	5	32	3	eptFus1;conCri1;chrAsi1	3	cavPor3;octDeg1;oryCun2	3	YES	TRUE	-	Retina - Visual perception , Non-specific - Transcription	DNA-binding, transcription regulation	Cluster with Retina (visual perception) cluster in Human protein atlas
GZMK	4.8017e-05	0.0143745	YES	8	37	3	nanGal1;conCri1;chrAsi1	0	NA	3	YES	TRUE	-	B-cells - Immune response , Non-specific - Transcription regulation	Hydrolase, Protease, Serine protease	-
FAM208B	5.692e-05	0.0166611	YES	9	32	3	eptFus1;myoDav1;myoLuc2	0	NA	1	NO
BCL2A1	5.9799e-05	0.0168793	YES	6	36	3	perManBai1;mm10;nanGal1	0	NA	3	YES	TRUE	-	Neutrophils - Humoral immune response , Macrophages - Immune response	Retards apoptosis	-
MAN2C1	6.02281e-05	0.0168793	YES	9	33	3	eptFus1;myoDav1;myoLuc2	0	NA	1	NO
KRT12	6.58367e-05	0.0179931	YES	10	36	3	nanGal1;conCri1;chrAsi1	0	NA	3	YES	TRUE	Meesmann corneal dystrophy 1	Not detected - no cluster assigned, Intestinal epithelial cells - Unknown function	Involved in corneal epithelium organization, integrity and corneal keratin expression.	NA
GNAT2	6.69344e-05	0.0179931	YES	9	38	2	hetGla2;chrAsi1	0	NA	2	NO
STX10	7.32609e-05	0.0192999	YES	9	35	5	micOch1;perManBai1;mm10;hetGla2;conCri1	3	rn6;cavPor3;octDeg1	4	YES	TRUE	-	Macrophages - Immune response , Monocytes & Neutrophils - Innate immune response	SNARE involved in vesicular transport from the late endosomes to the trans-Golgi network.	-
IPCEF1	8.56755e-05	0.0221278	YES	8	36	0	NA	0	NA	0	NO
HSD11B1L	8.9857e-05	0.0227615	YES	7	29	4	perManBai1;mm10;hetGla2;eptFus1	2	cavPor3;octDeg1	4	YES	TRUE	-	Brain - Ion transport , Ciliated cells - Cilium organization	Oxidoreductase	-
TMEM91	9.60671e-05	0.0238019	YES	10	33	4	eptFus1;myoDav1;myoLuc2;conCri1	0	NA	2	NO
TSNAX_DISC1	9.77322e-05	0.0238019	YES	10	34	0	NA	0	NA	0	NO
GJA8	9.93852e-05	0.0238019	YES	6	35	1	chrAsi1	0	NA	1	NO
CENPU	0.000106343	0.0245854	YES	9	35	0	NA	0	NA	0	NO
BORA	0.000108805	0.0245854	YES	10	36	0	NA	0	NA	0	NO
C4orf17	0.000111412	0.0245854	YES	8	31	0	NA	0	NA	0	NO
BIRC7	0.000111665	0.0245854	YES	6	34	3	nanGal1;hetGla2;chrAsi1	2	ochPri3;loxAfr3	3	YES	TRUE	-	Fibroblasts - Hormone signaling , Erythroid cells - Oxygen transport	Protease inhibitor, Thiol protease inhibitor, Transferase	lens protein (De Maria 2015), differential expression during transition of RPE cells to mesenchymal cells (Radeke 2015), Cell type enhanced expression (Hofbauer cells, Muller glia cells, Melanocytes, Extravillous trophoblasts, Cytotrophoblasts) in Human protein atlas
AKAP2	0.000111989	0.0245854	YES	10	33	0	NA	0	NA	0	NO
CDKL3	0.000114167	0.0246526	YES	9	36	0	NA	0	NA	0	NO
TGDS	0.000129703	0.0275556	YES	8	36	0	NA	0	NA	0	NO
RGS18	0.000137537	0.0287561	YES	9	33	0	NA	0	NA	0	NO
ZNF214	0.000141597	0.0291424	YES	8	35	6	perManBai1;mm10;nanGal1;hetGla2;myoDav1;myoLuc2	1	rn6	5	YES	TRUE	-	Ciliated cells - Cilium assembly , Ciliated cells - Cilium organization	Transcription regulation	-
RTL1	0.000147845	0.0299602	YES	5	28	1	hetGla2	1	ochPri3	1	NO
LBHD1	0.000165979	0.0331254	YES	10	36	8	micOch1;nanGal1;hetGla2;eptFus1;myoDav1;myoLuc2;conCri1;chrAsi1	8	rheMac3;macFas5;papAnu2;chlSab2;rhiRox1;speTri2;cavPor3;octDeg1	6	YES	TRUE	-	Retina - Phototransduction, Ciliated cells - Cilium organization, Cell type enhanced (Respiratory ciliated cells, Rod photoreceptor cells, Cone photoreceptor cells)	Transcription regulation	differential expression upon retinal gene knockout in mouse (datasets: Zhang 2015, Busskamp 2014, Hoppe 2016, Andzelm 2015)
UBE2U	0.000193055	0.037954	YES	8	36	2	nanGal1;hetGla2	0	NA	2	NO
MPP4	0.000232763	0.0450875	YES	10	32	2	nanGal1;hetGla2	0	NA	2	NO
CPNE1	0.000269798	0.051504		10	33	0	NA	0	NA	0
EYS	0.000275136	0.051532		8	24	7	micOch1;mm10;hetGla2;eptFus1;myoLuc2;conCri1;chrAsi1	7	ponAbe2;rn6;octDeg1;oryCun2;bosTau8;capHir1;musFur1	6
CABS1	0.000277769	0.051532		10	35	1	hetGla2	0	NA	1
IZUMO2	0.00028182	0.0515574		9	34	1	hetGla2	0	NA	1
BFSP2	0.000294444	0.053129		10	30	3	nanGal1;conCri1;chrAsi1	0	NA	3
PDZD9	0.000329147	0.0585521		9	36	1	hetGla2	0	NA	1
PGBD2	0.00033339	0.0585521		7	28	4	perManBai1;mm10;eptFus1;myoDav1	0	NA	3
ZYG11A	0.000346866	0.0601173		8	34	0	NA	0	NA	0
ALG6	0.000356829	0.0606875		9	33	0	NA	0	NA	0
ST20_MTHFS	0.000365021	0.0606875		7	37	0	NA	0	NA	0
DUSP21	0.00036761	0.0606875		10	35	1	hetGla2	0	NA	1
UBE3D	0.000368585	0.0606875		8	34	4	micOch1;perManBai1;mm10;hetGla2	2	speTri2;oryCun2	3
TEKT5	0.000377479	0.0611579		10	32	2	nanGal1;hetGla2	0	NA	2
BBIP1	0.000380728	0.0611579		10	37	0	NA	0	NA	0
CKLF_CMTM1	0.000443641	0.0686742		7	34	0	NA	0	NA	0
SPTBN5	0.000444185	0.0686742		10	29	6	nanGal1;hetGla2;eptFus1;myoDav1;myoLuc2;conCri1	5	rn6;camFer1;turTru2;orcOrc1;balAcu1	4
STX2	0.000447897	0.0686742		7	35	0	NA	0	NA	0
FAM71F1	0.000448803	0.0686742		9	37	0	NA	0	NA	0
CRYBB1	0.000456282	0.0686742		10	31	4	myoDav1;myoLuc2;conCri1;chrAsi1	0	NA	3
ARHGEF4	0.000467767	0.0686742		10	30	4	eptFus1;myoDav1;myoLuc2;chrAsi1	0	NA	2
TRIML1	0.000469204	0.0686742		9	30	0	NA	0	NA	0
SLC35C2	0.000469229	0.0686742		10	34	0	NA	0	NA	0
TPRKB	0.000481959	0.0697623		8	34	1	hetGla2	0	NA	1
GPA33	0.000490242	0.0701899		8	31	1	conCri1	0	NA	1
SLC10A3	0.000501148	0.0704996		9	34	1	hetGla2	0	NA	1
PRKAG3	0.000503109	0.0704996		10	35	0	NA	0	NA	0
ZNF501	0.000513295	0.0709521		6	33	5	mm10;hetGla2;eptFus1;myoDav1;chrAsi1	3	cavPor3;oryCun2;panHod1	4
GORAB	0.000521267	0.0709521		10	34	0	NA	0	NA	0
HMGB4	0.000522499	0.0709521		10	37	0	NA	0	NA	0
PALM2_AKAP2	0.000557714	0.0746738		10	33	1	mm10	0	NA	1
USP54	0.000561244	0.0746738		10	33	0	NA	0	NA	0
ZBTB32	0.000572837	0.075454		10	38	0	NA	0	NA	0
NPVF	0.000607686	0.0785175		10	37	3	eptFus1;myoDav1;myoLuc2	0	NA	1
DPPA2	0.000608016	0.0785175		8	34	3	eptFus1;myoDav1;myoLuc2	0	NA	1
DENND1C	0.000615802	0.0787509		10	31	0	NA	0	NA	0
SLC16A8	0.00067977	0.0851542		7	22	1	chrAsi1	0	NA	1
ROM1	0.000683582	0.0851542		9	37	2	nanGal1;conCri1	0	NA	2
GCSAM	0.000685267	0.0851542		10	36	0	NA	0	NA	0
BTG4	0.000724049	0.0891324		10	35	0	NA	0	NA	0
LHFPL5	0.000763357	0.0919379		10	36	0	NA	0	NA	0
ZNF280B	0.000782238	0.0919379		5	35	0	NA	0	NA	0
HIGD1B	0.000785821	0.0919379		10	38	0	NA	0	NA	0
ARL1	0.000785821	0.0919379		10	38	0	NA	0	NA	0
RNF133	0.000785821	0.0919379		10	38	0	NA	0	NA	0
VEGFC	0.000794353	0.0919379		10	35	0	NA	0	NA	0
NOXRED1	0.000795697	0.0919379		10	38	1	hetGla2	0	NA	1
C3orf62	0.000804134	0.0921048		7	37	0	NA	0	NA	0
TKTL2	0.000811973	0.0922009		9	36	3	nanGal1;hetGla2;conCri1	2	turTru2;orcOrc1	3
C19orf25	0.000827311	0.0931396		9	32	0	NA	0	NA	0
GABRR3	0.000836526	0.0932501		9	32	6	nanGal1;hetGla2;eptFus1;myoDav1;myoLuc2;conCri1	4	orcOrc1;cerSim1;canFam3;lepWed1	4
WFDC10A	0.000842451	0.0932501		6	26	1	hetGla2	0	NA	1
PHGR1	0.000862056	0.0939867		10	33	5	eptFus1;myoDav1;myoLuc2;conCri1;chrAsi1	2	orcOrc1;balAcu1	3
CD200R1	0.000863376	0.0939867		6	31	0	NA	0	NA	0
GSTO2	0.00088533	0.0955079		10	37	0	NA	0	NA	0
MKRN3	0.000891852	0.0955079		9	34	6	micOch1;perManBai1;mm10;hetGla2;eptFus1;myoLuc2	0	NA	4
PRSS36	0.000907606	0.0958059		8	29	4	micOch1;mm10;nanGal1;hetGla2	1	rn6	4
CCDC69	0.000911582	0.0958059		9	34	0	NA	0	NA	0
RTFDC1	0.000916454	0.0958059		10	36	1	hetGla2	0	NA	1
ARHGAP33	0.000934983	0.0969732		9	26	0	NA	0	NA	0
ZNF425	0.000958306	0.0983681		6	26	6	perManBai1;mm10;hetGla2;eptFus1;myoLuc2;conCri1	5	cavPor3;orcOrc1;panHod1;bosTau8;pteAle1	5
LRRIQ3	0.000965332	0.0983681		9	33	1	hetGla2	0	NA	1
C7orf62	0.000993724	0.0983681		10	36	0	NA	0	NA	0
TNP1	0.000993724	0.0983681		10	36	0	NA	0	NA	0
CRYBA2	0.000997741	0.0983681		10	35	4	eptFus1;myoLuc2;conCri1;chrAsi1	0	NA	3
CDNF	0.00099786	0.0983681		10	36	0	NA	0	NA	0
CPVL	0.00100071	0.0983681		10	36	0	NA	0	NA	0
HSF2BP	0.00101917	0.0994405		7	32	0	NA	0	NA	0
SHARPIN	0.00102887	0.0996488		9	31	0	NA	0	NA	0
TEX2	0.00104214	0.0999051		9	35	1	hetGla2	0	NA	1
KLHL33	0.0010569	0.0999051		10	35	0	NA	0	NA	0
KIAA0141	0.00105796	0.0999051		9	36	0	NA	0	NA	0
ANKRD10	0.00106185	0.0999051		9	30	0	NA	0	NA	0
LAMP1	0.00108157	0.099989		9	37	3	eptFus1;myoDav1;myoLuc2	0	NA	1
GPX1	0.00108275	0.099989		8	33	0	NA	0	NA	0
PPEF1	0.00109186	0.099989		10	27	0	NA	0	NA	0
BTBD18	0.00111867	0.099989		10	35	0	NA	0	NA	0
PRR30	0.00112232	0.099989		10	34	2	mm10;hetGla2	1	tarSyr2	2
LCN12	0.00112371	0.099989		6	28	2	nanGal1;hetGla2	0	NA	2
SUV39H2	0.0011283	0.099989		9	36	0	NA	0	NA	0
GOT1L1	0.00113244	0.099989		9	36	0	NA	0	NA	0
C12orf50	0.0011403	0.099989		9	35	0	NA	0	NA	0
H1F0	0.00114037	0.099989		10	35	0	NA	0	NA	0
TRIM38	0.00116354	0.099989		7	34	2	nanGal1;hetGla2	1	canFam3	2
SEPT1	0.00116522	0.099989		10	34	1	hetGla2	0	NA	1
TNFAIP3	0.00116731	0.099989		10	35	1	hetGla2	0	NA	1
RASSF6	0.00116902	0.099989		10	34	1	hetGla2	0	NA	1
PLAC8L1	0.00119629	0.100219		10	35	0	NA	0	NA	0
ZNF79	0.00120792	0.100219		6	35	5	mm10;nanGal1;hetGla2;myoDav1;myoLuc2	5	speTri2;rn6;cavPor3;oryCun2;ochPri3	4
C1orf185	0.00121467	0.100219		9	35	1	hetGla2	0	NA	1
IP6K3	0.00122225	0.100219		8	36	1	hetGla2	0	NA	1
TIMM50	0.0012249	0.100219		10	37	0	NA	0	NA	0
HIST1H1T	0.00123222	0.100219		9	38	1	hetGla2	0	NA	1
LIN7B	0.0012361	0.100219		8	31	0	NA	0	NA	0
C16orf54	0.00123967	0.100219		10	35	0	NA	0	NA	0
PKD2L2	0.00124666	0.100219		9	35	0	NA	0	NA	0
ARL11	0.00124988	0.100219		8	35	0	NA	0	NA	0
ITFG3	0.00125759	0.100219		9	31	1	chrAsi1	0	NA	1
HMGCLL1	0.00126301	0.100219		10	34	0	NA	0	NA	0
RGS11	0.00127163	0.100299		9	28	6	micOch1;perManBai1;mm10;nanGal1;hetGla2;chrAsi1	2	cavPor3;loxAfr3	5
PDCD2L	0.00129142	0.100994		8	35	0	NA	0	NA	0
GJE1	0.00129578	0.100994		10	37	4	nanGal1;hetGla2;conCri1;chrAsi1	3	rhiRox1;saiBol1;otoGar3	4
TMEM210	0.00132814	0.102584		7	33	1	hetGla2	0	NA	1
SEL1L2	0.00133175	0.102584		8	28	1	hetGla2	0	NA	1
B3GNTL1	0.00135137	0.10349		9	25	0	NA	0	NA	0
NR1I3	0.0013826	0.104481		10	38	3	eptFus1;myoDav1;conCri1	3	turTru2;orcOrc1;balAcu1	2
JSRP1	0.00138545	0.104481		10	26	0	NA	0	NA	0
UBE2E2	0.00138811	0.104481		8	29	1	chrAsi1	0	NA	1
IZUMO3	0.00140693	0.104994		8	32	0	NA	0	NA	0
GABRR2	0.00141228	0.104994		10	35	2	nanGal1;chrAsi1	0	NA	2
SERPIND1	0.00141884	0.104994		10	33	0	NA	0	NA	0
WNT8B	0.00143079	0.105287		10	33	0	NA	0	NA	0
IL15RA	0.00144361	0.105422		8	36	0	NA	0	NA	0
MATN2	0.0014663	0.105422		9	33	0	NA	0	NA	0
KANK2	0.00146884	0.105422		9	28	2	nanGal1;hetGla2	0	NA	2
PRSS56	0.00147023	0.105422		10	30	3	nanGal1;conCri1;chrAsi1	0	NA	3
ENTPD3	0.00147264	0.105422		9	33	0	NA	0	NA	0
SLC26A8	0.00148465	0.105707		9	34	0	NA	0	NA	0
ASAH2	0.00151225	0.107094		7	32	0	NA	0	NA	0
C2orf61	0.00156553	0.110274		10	35	1	hetGla2	0	NA	1
CGN	0.00160206	0.110924		10	33	1	hetGla2	0	NA	1
GRK7	0.00161134	0.110924		10	35	6	micOch1;perManBai1;mm10;nanGal1;hetGla2;myoDav1	1	rn6	5
NFE2L1	0.00161171	0.110924		10	37	0	NA	0	NA	0
GJA9	0.00161374	0.110924		9	38	9	perManBai1;mm10;nanGal1;hetGla2;eptFus1;myoDav1;myoLuc2;conCri1;chrAsi1	6	papAnu2;rn6;cavPor3;octDeg1;ochPri3;lepWed1	7
GFPT2	0.00161687	0.110924		10	32	1	hetGla2	0	NA	1
KCNK2	0.0016267	0.11102		10	32	0	NA	0	NA	0
C19orf81	0.00164626	0.111622		7	29	0	NA	0	NA	0
TTC23L	0.0016647	0.111622		10	32	2	myoDav1;myoLuc2	0	NA	1
PRMT2	0.00166863	0.111622		9	34	1	hetGla2	0	NA	1
TMC8	0.00166942	0.111622		6	29	0	NA	0	NA	0
UHRF1BP1	0.00169746	0.112924		10	35	0	NA	0	NA	0
GSTM5	0.00171369	0.11343		7	29	2	mm10;hetGla2	1	musFur1	2
ARSJ	0.00179601	0.118285		8	32	0	NA	0	NA	0
ATP1B1	0.00181218	0.118696		9	37	1	hetGla2	0	NA	1
HRH1	0.00182929	0.118696		10	36	0	NA	0	NA	0
C21orf91	0.00182929	0.118696		10	36	0	NA	0	NA	0
RPS17	0.00183985	0.118797		7	36	1	myoDav1	0	NA	1
NOL7	0.00184978	0.118855		9	32	0	NA	0	NA	0
HIST1H2BN	0.00186243	0.119087		7	32	0	NA	0	NA	0
APOBEC3H	0.00193073	0.122858		7	36	1	eptFus1	0	NA	1
CEBPZ	0.00196199	0.124247		10	34	1	hetGla2	0	NA	1
CRYBB2	0.00197821	0.124574		8	32	1	chrAsi1	0	NA	1
GUCY2F	0.00198607	0.124574		10	33	6	nanGal1;hetGla2;eptFus1;myoDav1;myoLuc2;chrAsi1	3	speTri2;musFur1;triMan1	4
GPATCH11	0.00200433	0.125124		8	36	0	NA	0	NA	0
PRSS54	0.00202975	0.125924		10	36	1	hetGla2	0	NA	1
CCSER2	0.00203627	0.125924		10	35	0	NA	0	NA	0
RBAK	0.00207389	0.126241		8	34	0	NA	0	NA	0
COMMD3_BMI1	0.00207689	0.126241		10	35	0	NA	0	NA	0
PFN4	0.00208414	0.126241		10	37	3	hetGla2;eptFus1;myoLuc2	0	NA	2
CXorf65	0.00208682	0.126241		10	35	1	nanGal1	0	NA	1
CABP5	0.00208932	0.126241		7	37	1	conCri1	0	NA	1
HDAC11	0.00210192	0.126422		10	34	0	NA	0	NA	0
ADORA2B	0.00213046	0.127406		8	28	0	NA	0	NA	0
OMA1	0.00213762	0.127406		10	35	0	NA	0	NA	0
SEBOX	0.0021729	0.128925		10	38	4	nanGal1;hetGla2;conCri1;chrAsi1	5	ponAbe2;calJac3;saiBol1;loxAfr3;triMan1	4
LCTL	0.00220799	0.13042		10	34	3	nanGal1;hetGla2;chrAsi1	1	vicPac2	3
ZNF346	0.00222825	0.131029		9	36	0	NA	0	NA	0
CTD_2616J11.11	0.00229596	0.13441		8	33	1	hetGla2	0	NA	1
NPY5R	0.00231251	0.134781		10	37	0	NA	0	NA	0
PLA2G12A	0.00237421	0.137767		8	30	0	NA	0	NA	0
BLNK	0.00240253	0.13828		9	31	0	NA	0	NA	0
TMPRSS12	0.00240405	0.13828		10	33	1	hetGla2	0	NA	1
LY6G5B	0.00241495	0.138303		10	38	2	micOch1;perManBai1	0	NA	1
VPS72	0.00243815	0.13855		10	33	0	NA	0	NA	0
TM6SF1	0.0024403	0.13855		7	35	1	myoLuc2	0	NA	1
KIF13A	0.00247576	0.139475		7	31	0	NA	0	NA	0
FIGLA	0.00248333	0.139475		9	32	0	NA	0	NA	0
LRRC14	0.00250338	0.139475		9	37	1	chrAsi1	0	NA	1
TMEM190	0.00250928	0.139475		6	30	0	NA	0	NA	0
ADAM32	0.00251432	0.139475		8	25	1	hetGla2	0	NA	1
LIMD1	0.00252226	0.139475		9	31	1	hetGla2	0	NA	1
THAP6	0.00253072	0.139475		10	36	0	NA	0	NA	0
SLC35G6	0.00255075	0.139808		9	35	2	eptFus1;myoLuc2	1	vicPac2	1
UTS2R	0.00255798	0.139808		7	28	1	hetGla2	0	NA	1
PDE8A	0.00257219	0.140004		6	31	0	NA	0	NA	0
TIGD6	0.00259727	0.140733		9	37	9	micOch1;perManBai1;mm10;hetGla2;eptFus1;myoDav1;myoLuc2;conCri1;chrAsi1	15	ponAbe2;calJac3;saiBol1;tarSyr2;rn6;cavPor3;octDeg1;oryCun2;ochPri3;turTru2;orcOrc1;panHod1;bosTau8;bisBis1;capHir1	6
SLC36A3	0.0026083	0.140733		8	36	3	nanGal1;hetGla2;chrAsi1	2	loxAfr3;triMan1	3
ARHGEF12	0.00261765	0.140733		8	29	1	hetGla2	0	NA	1
MIOX	0.00265919	0.142119		9	29	0	NA	0	NA	0
DMRT1	0.002665	0.142119		8	26	2	myoDav1;myoLuc2	0	NA	1
SGSM1	0.00271408	0.143701		7	32	0	NA	0	NA	0
PLEKHS1	0.00271649	0.143701		10	38	1	conCri1	0	NA	1
LENEP	0.00273732	0.144224		9	36	0	NA	0	NA	0
DOCK9	0.0027489	0.144257		9	31	0	NA	0	NA	0
ZNF672	0.00276701	0.144631		6	29	2	myoLuc2;conCri1	3	cavPor3;octDeg1;ochPri3	2
C3orf22	0.00284552	0.148088		8	33	3	nanGal1;myoDav1;myoLuc2	0	NA	2
CALR3	0.00285766	0.148088		10	27	1	hetGla2	0	NA	1
SCD	0.00288003	0.148088		10	35	1	hetGla2	0	NA	1
PALLD	0.00288402	0.148088		9	28	1	hetGla2	0	NA	1
C11orf80	0.00288936	0.148088		9	25	1	hetGla2	0	NA	1
ZNF621	0.00292776	0.148946		10	33	3	micOch1;mm10;nanGal1	0	NA	3
ZFP30	0.00292871	0.148946		8	34	2	myoLuc2;chrAsi1	2	calJac3;saiBol1	2
ZC3H8	0.00298715	0.151334		9	37	1	chrAsi1	0	NA	1
DDHD2	0.003012	0.151886		10	31	0	NA	0	NA	0
IDO1	0.00302111	0.151886		9	35	1	chrAsi1	0	NA	1
CCL1	0.00304933	0.152721		10	36	3	eptFus1;myoDav1;myoLuc2	0	NA	1
COX18	0.00306555	0.152952		9	35	1	hetGla2	0	NA	1
BMPER	0.00311101	0.154252		8	33	1	eptFus1	0	NA	1
ABCB5	0.00311502	0.154252		9	29	3	micOch1;nanGal1;hetGla2	2	orcOrc1;balAcu1	3
TSTD1	0.00313801	0.154808		9	34	2	eptFus1;myoLuc2	0	NA	1
IL16	0.00319977	0.157266		7	31	0	NA	0	NA	0
PNPLA1	0.00328203	0.16071		8	35	0	NA	0	NA	0
FAM132B	0.00334423	0.162716		8	20	1	hetGla2	0	NA	1
LRCH1	0.00335605	0.162716		9	34	0	NA	0	NA	0
CKLF	0.00336005	0.162716		9	36	0	NA	0	NA	0
WASF1	0.00340739	0.164404		9	34	0	NA	0	NA	0
ZNF891	0.00346157	0.166408		7	35	5	nanGal1;hetGla2;eptFus1;myoDav1;conCri1	8	tarSyr2;speTri2;oryCun2;felCat8;canFam3;musFur1;odoRosDiv1;lepWed1	4
IMPG1	0.00347674	0.166529		10	35	4	nanGal1;hetGla2;conCri1;chrAsi1	7	otoGar3;cavPor3;vicPac2;turTru2;orcOrc1;panHod1;capHir1	4
USP50	0.00356249	0.16972		9	35	2	nanGal1;hetGla2	2	calJac3;saiBol1	2
LRP2BP	0.00356911	0.16972		10	35	1	hetGla2	0	NA	1
SPAG4	0.00360403	0.170559		8	33	2	nanGal1;chrAsi1	0	NA	2
NR0B1	0.00361265	0.170559		9	31	2	eptFus1;myoLuc2	0	NA	1
BTBD7	0.00362625	0.170589		8	31	1	hetGla2	0	NA	1
FAM71D	0.00368969	0.172956		10	37	1	hetGla2	0	NA	1
MMRN2	0.00381002	0.177963		7	26	0	NA	0	NA	0
PCED1A	0.00389524	0.181301		10	38	1	chrAsi1	0	NA	1
KIAA0226	0.00391331	0.1815		9	34	5	micOch1;perManBai1;mm10;nanGal1;hetGla2	2	cavPor3;octDeg1	4
ARMC12	0.00400499	0.185101		8	33	0	NA	0	NA	0
WDR11	0.00402114	0.185131		9	32	0	NA	0	NA	0
DDIT4L	0.00404974	0.185131		9	37	1	hetGla2	0	NA	1
FSBP	0.00405625	0.185131		10	37	0	NA	0	NA	0
HSDL2	0.00406186	0.185131		8	33	0	NA	0	NA	0
TEX101	0.00413682	0.187897		9	35	0	NA	0	NA	0
SNRPD2	0.00418065	0.189158		10	38	1	chrAsi1	0	NA	1
DPYD	0.00419957	0.189158		7	29	0	NA	0	NA	0
C1orf105	0.00420765	0.189158		8	36	2	nanGal1;hetGla2	3	turTru2;orcOrc1;balAcu1	2
STOX1	0.00429848	0.192584		10	36	0	NA	0	NA	0
ACSBG2	0.00431403	0.192625		5	32	1	hetGla2	1	otoGar3	1
LYZL2	0.00433245	0.192794		6	35	3	nanGal1;hetGla2;myoLuc2	1	panPan1	3
IL12RB2	0.00437163	0.193684		10	34	1	hetGla2	0	NA	1
PTPMT1	0.00438186	0.193684		6	21	0	NA	0	NA	0
PLA2R1	0.00440257	0.193861		9	34	0	NA	0	NA	0
WDR5B	0.00441529	0.193861		9	38	0	NA	0	NA	0
NME6	0.00445101	0.194382		7	37	0	NA	0	NA	0
RCAN3	0.00445668	0.194382		9	35	0	NA	0	NA	0
SLC7A8	0.00450485	0.195835		10	34	0	NA	0	NA	0
LYZL1	0.00457039	0.196852		10	33	4	nanGal1;hetGla2;myoDav1;myoLuc2	0	NA	3
C6orf211	0.0045742	0.196852		10	37	0	NA	0	NA	0
C11orf65	0.00457932	0.196852		9	34	1	hetGla2	0	NA	1
PLSCR2	0.00458803	0.196852		6	31	1	hetGla2	1	bisBis1	1
ZMYM6	0.00460838	0.197083		8	33	1	chrAsi1	0	NA	1
BTBD8	0.00468153	0.199563		7	37	1	chrAsi1	0	NA	1
PASD1	0.00469795	0.199617		10	32	8	micOch1;perManBai1;mm10;nanGal1;hetGla2;eptFus1;conCri1;chrAsi1	11	speTri2;cavPor3;octDeg1;oryCun2;ochPri3;turTru2;orcOrc1;bosTau8;cerSim1;felCat8;musFur1	7
GABRR1	0.00472792	0.200074		10	37	1	chrAsi1	0	NA	1
S100PBP	0.00473908	0.200074		10	36	0	NA	0	NA	0
CASP4	0.00476765	0.200372		7	30	2	perManBai1;chrAsi1	0	NA	2
ZP3	0.00477657	0.200372		10	35	1	chrAsi1	0	NA	1
ZNF576	0.00481265	0.201245		10	37	5	micOch1;perManBai1;mm10;eptFus1;chrAsi1	0	NA	4
DRG1	0.00485765	0.202484		10	35	0	NA	0	NA	0
CXCR1	0.00487301	0.202484		8	34	1	myoLuc2	0	NA	1
SAMD7	0.00494123	0.204673		9	36	1	chrAsi1	0	NA	1
GCA	0.00496122	0.204856		10	36	1	chrAsi1	0	NA	1
RAB14	0.00498269	0.204997		10	36	0	NA	0	NA	0
HACL1	0.00499576	0.204997		10	33	1	hetGla2	0	NA	1
IZUMO1R	0.00503173	0.205832		9	30	0	NA	0	NA	0
ANKRD33	0.00506147	0.206408		10	31	3	nanGal1;myoDav1;chrAsi1	0	NA	3
FGF2	0.00514474	0.207191		6	23	0	NA	0	NA	0
BTBD1	0.00514582	0.207191		5	20	0	NA	0	NA	0
ANGPTL6	0.00515184	0.207191		7	27	0	NA	0	NA	0
C7orf61	0.00515469	0.207191		9	35	1	hetGla2	1	octDeg1	1
SNRPN	0.00515931	0.207191		9	35	1	chrAsi1	0	NA	1
RLBP1	0.00522939	0.208356		8	34	1	myoDav1	0	NA	1
CPN1	0.00523257	0.208356		7	31	0	NA	0	NA	0
HES2	0.0052358	0.208356		6	28	0	NA	0	NA	0
SCNM1	0.00528576	0.209328		10	36	0	NA	0	NA	0
DEFB119	0.005292	0.209328		9	36	0	NA	0	NA	0
AQP8	0.00531905	0.209725		8	36	0	NA	0	NA	0
DRAM2	0.00534446	0.209725		9	36	0	NA	0	NA	0
TRPM1	0.00536008	0.209725		7	31	1	myoDav1	0	NA	1
BSG	0.00536571	0.209725		9	33	0	NA	0	NA	0
KLHDC7B	0.00542025	0.210409		9	30	0	NA	0	NA	0
RAD18	0.00542291	0.210409		10	34	0	NA	0	NA	0
C15orf40	0.00543115	0.210409		7	29	1	myoDav1	0	NA	1
GRB10	0.00545523	0.210563		8	32	0	NA	0	NA	0
PEX11G	0.00547688	0.210563		10	35	0	NA	0	NA	0
IL18RAP	0.00550547	0.210563		10	35	1	chrAsi1	0	NA	1
CASP8	0.00554264	0.210563		9	35	2	eptFus1;myoDav1	0	NA	1
SLC39A2	0.00557235	0.210563		8	36	0	NA	0	NA	0
SPAG11B	0.00557706	0.210563		8	35	2	perManBai1;hetGla2	1	tarSyr2	2
DSG3	0.00557999	0.210563		9	32	0	NA	0	NA	0
GGPS1	0.0055905	0.210563		10	37	0	NA	0	NA	0
INSL6	0.00559209	0.210563		9	35	1	hetGla2	0	NA	1
C1orf27	0.00559498	0.210563		9	34	0	NA	0	NA	0
RCN2	0.00564984	0.211777		8	35	0	NA	0	NA	0
CYB5D2	0.00565938	0.211777		8	30	0	NA	0	NA	0
MTNR1B	0.00569991	0.212689		8	32	3	nanGal1;hetGla2;chrAsi1	3	calJac3;orcOrc1;balAcu1	3
ICAM3	0.00573755	0.213489		8	35	4	perManBai1;mm10;nanGal1;conCri1	1	rn6	4
C10orf10	0.00582984	0.215935		9	37	1	chrAsi1	0	NA	1
MYEF2	0.00585419	0.215935		10	37	0	NA	0	NA	0
SLC5A11	0.00585466	0.215935		7	34	0	NA	0	NA	0
RGR	0.00588194	0.215935		10	37	1	chrAsi1	0	NA	1
FGD6	0.00588525	0.215935		9	32	0	NA	0	NA	0
TEDDM1	0.00590882	0.216197		10	27	1	hetGla2	0	NA	1
HEATR9	0.00593303	0.216482		10	31	1	nanGal1	0	NA	1
GLYAT	0.00597394	0.217372		10	33	0	NA	0	NA	0
LY6G5C	0.0059908	0.217385		10	37	2	micOch1;hetGla2	0	NA	2
SF3B4	0.0061216	0.221271		9	34	1	chrAsi1	0	NA	1
ARL16	0.00613229	0.221271		8	32	1	chrAsi1	0	NA	1
LRRC70	0.00615721	0.221271		10	36	9	micOch1;perManBai1;mm10;nanGal1;hetGla2;eptFus1;myoDav1;myoLuc2;conCri1	8	otoGar3;rn6;cavPor3;octDeg1;oryCun2;ochPri3;pteAle1;pteVam1	6
WNT7B	0.00618705	0.221271		7	26	0	NA	0	NA	0
COPRS	0.00619364	0.221271		8	34	2	perManBai1;nanGal1	0	NA	2
SCP2D1	0.00619869	0.221271		10	38	1	conCri1	0	NA	1
DHX30	0.00625191	0.221465		8	33	0	NA	0	NA	0
IQCE	0.00626038	0.221465		5	28	2	nanGal1;chrAsi1	2	tarSyr2;otoGar3	2
PDE7A	0.00628397	0.221465		9	33	0	NA	0	NA	0
SH2D1B	0.00628876	0.221465		8	35	2	eptFus1;myoDav1	0	NA	1
AKAP7	0.00629086	0.221465		9	33	0	NA	0	NA	0
CRCP	0.00630576	0.221465		9	32	0	NA	0	NA	0
NMUR1	0.00635133	0.221465		10	35	1	hetGla2	0	NA	1
LEKR1	0.00638427	0.221465		10	33	1	hetGla2	0	NA	1
ZKSCAN5	0.00638541	0.221465		9	33	0	NA	0	NA	0
INTS4	0.00640285	0.221465		7	31	1	myoLuc2	0	NA	1
MLF1	0.00642072	0.221465		10	37	1	chrAsi1	0	NA	1
CLEC14A	0.00642814	0.221465		10	30	0	NA	0	NA	0
CYP4F12	0.00643616	0.221465		5	27	2	mm10;nanGal1	2	bosTau8;equCab2	2
DYDC1	0.00643951	0.221465		9	37	1	mm10	0	NA	1
TYMS	0.00662597	0.227284		5	32	0	NA	0	NA	0
PTGDS	0.00674489	0.230706		9	28	0	NA	0	NA	0
CCNE1	0.00676074	0.230706		7	34	0	NA	0	NA	0
ZNF200	0.00687958	0.233325		10	37	3	micOch1;perManBai1;mm10	0	NA	2
NLRC3	0.00688225	0.233325		9	27	1	hetGla2	0	NA	1
CAPN11	0.00689063	0.233325		8	35	1	hetGla2	1	canFam3	1
SYNJ2BP	0.00691806	0.233653		9	35	1	chrAsi1	0	NA	1
ROS1	0.00700414	0.235955		9	30	1	hetGla2	0	NA	1
IZUMO4	0.00712172	0.239009		10	26	3	eptFus1;myoDav1;myoLuc2	0	NA	1
GJA9_MYCBP	0.00713107	0.239009		9	38	9	perManBai1;mm10;nanGal1;hetGla2;eptFus1;myoDav1;myoLuc2;conCri1;chrAsi1	6	papAnu2;rn6;cavPor3;octDeg1;ochPri3;lepWed1	7
FOLR2	0.00719302	0.239585		10	36	4	nanGal1;hetGla2;eptFus1;conCri1	3	cavPor3;octDeg1;ochPri3	4
PPM1N	0.0072147	0.239585		8	28	3	nanGal1;myoLuc2;conCri1	1	camFer1	3
CYP19A1	0.00721853	0.239585		9	36	0	NA	0	NA	0
COG3	0.00722103	0.239585		8	32	0	NA	0	NA	0
SIGLECL1	0.00733623	0.242796		9	34	2	hetGla2;conCri1	3	tarSyr2;cavPor3;octDeg1	2
LIPT1	0.00739895	0.243761		9	36	2	eptFus1;myoLuc2	0	NA	1
AKAP10	0.0074024	0.243761		9	33	0	NA	0	NA	0
LGR4	0.00744052	0.244405		10	34	1	hetGla2	0	NA	1
RTN2	0.00746217	0.244507		9	37	1	hetGla2	0	NA	1
RAD51L3_RFFL	0.00749349	0.244924		9	31	0	NA	0	NA	0
TRIM16L	0.0075659	0.246678		10	32	0	NA	0	NA	0
SLC35E4	0.00758592	0.24672		9	32	0	NA	0	NA	0
PRR15	0.00762788	0.247474		10	31	1	chrAsi1	0	NA	1
TBX22	0.00767099	0.248261		8	28	1	chrAsi1	0	NA	1
POLR2I	0.00774857	0.250157		10	37	0	NA	0	NA	0
KIAA1407	0.00780373	0.251322		9	35	2	eptFus1;myoDav1	0	NA	1
C7orf72	0.00787114	0.251666		8	28	1	hetGla2	0	NA	1
LYZ	0.00787771	0.251666		8	36	2	micOch1;hetGla2	0	NA	2
BEST1	0.0078828	0.251666		9	33	3	nanGal1;hetGla2;myoLuc2	0	NA	3
CLHC1	0.00789084	0.251666		9	31	0	NA	0	NA	0
LEFTY1	0.00792913	0.252277		6	22	2	myoLuc2;chrAsi1	1	musFur1	2
STON2	0.00797245	0.252811		10	33	0	NA	0	NA	0
PTK2	0.0079843	0.252811		8	30	0	NA	0	NA	0
TRIM27	0.00802919	0.25314		8	26	2	eptFus1;myoLuc2	0	NA	1
PPP1R3G	0.00803314	0.25314		8	22	1	hetGla2	0	NA	1
FAM98C	0.00806056	0.253398		8	24	0	NA	0	NA	0
CBX8	0.00814324	0.255022		9	33	1	chrAsi1	0	NA	1
GRAP	0.00815093	0.255022		10	30	1	chrAsi1	0	NA	1
MBOAT1	0.00817151	0.255059		10	30	0	NA	0	NA	0
RNF112	0.00824016	0.256454		7	24	0	NA	0	NA	0
SPG11	0.00825512	0.256454		7	28	0	NA	0	NA	0
HUNK	0.00830707	0.256945		7	30	1	nanGal1	0	NA	1
UBAP2L	0.00830993	0.256945		10	29	0	NA	0	NA	0
WDR60	0.00840234	0.259193		9	27	1	eptFus1	0	NA	1
OXT	0.00846628	0.260093		7	24	0	NA	0	NA	0
LNP1	0.00848429	0.260093		9	35	1	nanGal1	4	panTro4;panPan1;rhiRox1;calJac3	1
C1orf177	0.00850287	0.260093		10	38	2	nanGal1;hetGla2	2	turTru2;balAcu1	2
IRAK2	0.00851048	0.260093		5	33	0	NA	0	NA	0
ERAP2	0.00858293	0.2617		9	37	5	perManBai1;mm10;nanGal1;hetGla2;chrAsi1	6	rn6;cavPor3;octDeg1;oryCun2;ochPri3;felCat8	5
SPATC1L	0.00869071	0.264374		9	28	1	hetGla2	0	NA	1
PVR	0.00878354	0.266018		9	28	1	myoLuc2	0	NA	1
IL36A	0.00880902	0.266018		8	31	2	myoDav1;chrAsi1	2	saiBol1;turTru2	2
SYCP3	0.00885039	0.266018		8	36	0	NA	0	NA	0
MTMR9	0.00885863	0.266018		9	35	0	NA	0	NA	0
MRPL1	0.00888784	0.266018		10	31	0	NA	0	NA	0
LAYN	0.00890516	0.266018		9	36	1	chrAsi1	0	NA	1
ASB15	0.00890805	0.266018		9	34	1	conCri1	0	NA	1
ZNF280D	0.00893282	0.266018		9	33	0	NA	0	NA	0
ATP1A4	0.00895562	0.266018		8	34	2	nanGal1;hetGla2	2	orcOrc1;balAcu1	2
EGFL7	0.00896999	0.266018		7	31	0	NA	0	NA	0
GLB1L3	0.00899768	0.266018		8	28	1	nanGal1	0	NA	1
QPCTL	0.00900278	0.266018		10	35	1	chrAsi1	0	NA	1
AGK	0.00900729	0.266018		9	33	0	NA	0	NA	0
HIGD1C	0.0090312	0.266128		9	33	1	hetGla2	3	otoGar3;turTru2;orcOrc1	1
PPP1R18	0.00907905	0.26694		8	27	0	NA	0	NA	0
KCNAB2	0.00912879	0.267285		7	29	0	NA	0	NA	0
GSTM4	0.00916482	0.267285		7	27	2	hetGla2;conCri1	0	NA	2
IRGC	0.00916544	0.267285		8	31	1	hetGla2	2	turTru2;orcOrc1	1
TAF10	0.00917193	0.267285		7	25	1	myoDav1	0	NA	1
JARID2	0.00920966	0.267792		10	26	0	NA	0	NA	0
GSTA4	0.00923356	0.267895		9	37	1	mm10	1	rn6	1
GABRQ	0.00937261	0.271332		10	32	0	NA	0	NA	0
LGSN	0.00948106	0.27387		9	31	3	nanGal1;conCri1;chrAsi1	1	papAnu2	3
POLH	0.00954763	0.2743		9	34	1	nanGal1	0	NA	1
PYCR1	0.00955394	0.2743		9	35	0	NA	0	NA	0
CRYGC	0.00955844	0.2743		9	32	1	nanGal1	0	NA	1
TXNRD3	0.00962377	0.275575		10	28	1	hetGla2	0	NA	1
COA1	0.00966055	0.276028		5	35	2	hetGla2;chrAsi1	3	speTri2;oryCun2;felCat8	2
TMEM115	0.0101759	0.290124		10	37	0	NA	0	NA	0
TINF2	0.0103118	0.293362		10	37	0	NA	0	NA	0
HAUS6	0.0103499	0.293813		9	32	0	NA	0	NA	0
DCP1B	0.0104997	0.296227		10	29	1	chrAsi1	0	NA	1
TOR4A	0.0105024	0.296227		6	23	0	NA	0	NA	0
KHDC1	0.0105024	0.296227		7	32	3	nanGal1;hetGla2;chrAsi1	10	cavPor3;octDeg1;turTru2;orcOrc1;bosTau8;bisBis1;cerSim1;felCat8;canFam3;musFur1	3
ZNF175	0.0105605	0.29624		5	30	2	micOch1;conCri1	1	oryCun2	2
SYNJ2BP_COX16	0.0105827	0.29624		9	32	1	chrAsi1	0	NA	1
HLA_DRA	0.0105885	0.29624		8	33	0	NA	0	NA	0
PPP1R1B	0.0105929	0.29624		9	36	0	NA	0	NA	0
PXMP2	0.0107182	0.298108		8	20	0	NA	0	NA	0
FAM229B	0.0107258	0.298108		9	37	0	NA	0	NA	0
HPCAL1	0.0107275	0.298108		8	37	0	NA	0	NA	0
ZNF322	0.0107822	0.298995		10	32	0	NA	0	NA	0
FAM118B	0.0109501	0.302792		9	33	0	NA	0	NA	0
LELP1	0.0109651	0.302792		10	34	1	nanGal1	1	orcOrc1	1
ZNF862	0.0110045	0.303245		9	34	3	mm10;nanGal1;chrAsi1	2	octDeg1;musFur1	3
FAM83A	0.011051	0.30389		10	27	1	hetGla2	0	NA	1
OLFML1	0.0110861	0.304221		10	36	1	mm10	0	NA	1
DEFB134	0.011313	0.308607		5	31	1	mm10	0	NA	1
ARPC2	0.0113142	0.308607		10	37	1	hetGla2	0	NA	1
CENPA	0.0113162	0.308607		8	32	0	NA	0	NA	0
PDE3A	0.0113556	0.309042		8	21	0	NA	0	NA	0
LUZP4	0.0114076	0.309744		8	25	6	mm10;nanGal1;hetGla2;eptFus1;myoDav1;myoLuc2	4	papAnu2;cavPor3;panHod1;bosTau8	4
CYB5R2	0.0114285	0.309744		10	38	1	hetGla2	0	NA	1
FAM150B	0.0115347	0.311672		8	24	0	NA	0	NA	0
ZP4	0.0115469	0.311672		9	34	3	mm10;conCri1;chrAsi1	0	NA	3
FAM227B	0.0115776	0.311861		10	26	1	hetGla2	0	NA	1
TCP11	0.0116073	0.312022		10	35	1	chrAsi1	0	NA	1
KCNK17	0.0116946	0.31373		8	30	2	mm10;hetGla2	0	NA	2
TBCCD1	0.0117682	0.315062		9	36	0	NA	0	NA	0
SLC38A11	0.0118001	0.315275		10	35	0	NA	0	NA	0
BEX5	0.0119308	0.318123		7	30	2	mm10;nanGal1	0	NA	2
ADAM33	0.0119821	0.318846		8	31	0	NA	0	NA	0
OAS3	0.0120455	0.319886		8	31	2	nanGal1;hetGla2	3	camFer1;bosTau8;lepWed1	2
CTRC	0.012096	0.320411		10	34	0	NA	0	NA	0
ST3GAL6	0.0121139	0.320411		9	35	0	NA	0	NA	0
PYY	0.0122192	0.322548		8	31	1	myoLuc2	0	NA	1
NNT	0.0122662	0.323141		9	29	1	mm10	0	NA	1
MANSC4	0.0123497	0.32448		10	35	1	hetGla2	0	NA	1
C17orf64	0.0123663	0.32448		10	37	1	hetGla2	0	NA	1
KIF21B	0.0124336	0.325232		8	26	1	myoDav1	0	NA	1
CFAP36	0.0124443	0.325232		10	33	1	mm10	0	NA	1
TTC6	0.0124891	0.325754		8	29	1	hetGla2	0	NA	1
CD101	0.0125187	0.325881		10	35	0	NA	0	NA	0
SYCE1L	0.0125955	0.327233		9	29	1	hetGla2	0	NA	1
CCNI2	0.012671	0.328547		9	29	7	micOch1;perManBai1;mm10;nanGal1;myoDav1;myoLuc2;conCri1	6	otoGar3;rn6;vicPac2;camFer1;panHod1;musFur1	5
CCT6B	0.0127672	0.330391		9	31	2	nanGal1;hetGla2	2	calJac3;balAcu1	2
RP11_477N12.3	0.0128375	0.331561		9	30	4	hetGla2;myoDav1;myoLuc2;conCri1	3	cavPor3;equCab2;cerSim1	3
CCDC175	0.0129168	0.332762		8	35	1	hetGla2	0	NA	1
OTUD6A	0.0129372	0.332762		10	28	1	nanGal1	0	NA	1
SLC30A10	0.0129598	0.332762		7	20	0	NA	0	NA	0
HIST2H4B	0.0129917	0.332932		6	27	1	mm10	0	NA	1
FAM71A	0.0130896	0.33479		8	35	1	chrAsi1	1	orcOrc1	1
ACRV1	0.0132366	0.337892		9	35	0	NA	0	NA	0
USHBP1	0.0133504	0.340139		9	34	0	NA	0	NA	0
NDST3	0.0135317	0.342961		8	29	1	eptFus1	0	NA	1
IL1R1	0.0135403	0.342961		9	37	0	NA	0	NA	0
PCDHGA11	0.0135405	0.342961		10	31	1	hetGla2	0	NA	1
SPHKAP	0.0135653	0.342961		10	33	1	mm10	0	NA	1
MRPL13	0.0135922	0.342981		10	33	0	NA	0	NA	0
CDRT1	0.0136523	0.343841		9	32	1	hetGla2	0	NA	1
ANXA13	0.0137724	0.346202		10	35	1	mm10	0	NA	1
HIST1H2BG	0.013813	0.346268		10	35	0	NA	0	NA	0
SPAG11A	0.0138276	0.346268		8	34	3	micOch1;perManBai1;hetGla2	1	tarSyr2	2
GPBP1L1	0.0139211	0.346819		10	34	1	nanGal1	0	NA	1
ZNF157	0.0139275	0.346819		7	35	2	mm10;conCri1	2	oryCun2;ochPri3	2
TBC1D17	0.0139286	0.346819		8	30	0	NA	0	NA	0
RNF135	0.0139852	0.347048		7	24	2	hetGla2;conCri1	3	turTru2;balAcu1;felCat8	2
CDX4	0.0139905	0.347048		6	23	0	NA	0	NA	0
C3AR1	0.0140799	0.348609		10	38	1	conCri1	0	NA	1
GRK4	0.0141124	0.348759		9	31	1	hetGla2	1	orcOrc1	1
FAM189A1	0.0141906	0.350036		8	30	0	NA	0	NA	0
AC004754.3	0.0142337	0.350442		9	31	0	NA	0	NA	0
ANKLE1	0.0143085	0.351405		8	33	3	micOch1;perManBai1;conCri1	1	tarSyr2	2
MON2	0.0143434	0.351405		9	32	0	NA	0	NA	0
PKD2L1	0.0143529	0.351405		9	34	2	hetGla2;chrAsi1	3	turTru2;orcOrc1;balAcu1	2
C7orf31	0.0143898	0.351657		10	37	1	hetGla2	1	balAcu1	1
ZNF155	0.0145581	0.355109		5	22	5	micOch1;perManBai1;nanGal1;hetGla2;eptFus1	3	oryCun2;panHod1;triMan1	4
RETN	0.0146055	0.355607		8	34	1	myoDav1	0	NA	1
TOR1AIP2	0.0147066	0.357409		9	34	0	NA	0	NA	0
FAM71C	0.01488	0.35808		10	36	8	micOch1;perManBai1;mm10;nanGal1;hetGla2;eptFus1;myoDav1;myoLuc2	9	rn6;octDeg1;vicPac2;camFer1;balAcu1;bosTau8;bisBis1;equCab2;cerSim1	5
SRP54	0.0148831	0.35808		8	36	0	NA	0	NA	0
SOHLH2	0.0148865	0.35808		9	36	0	NA	0	NA	0
PRL	0.0149162	0.35808		8	33	2	eptFus1;myoLuc2	4	panHod1;bosTau8;bisBis1;capHir1	1
C14orf180	0.0149166	0.35808		7	29	0	NA	0	NA	0
NMRK1	0.0149314	0.35808		10	35	0	NA	0	NA	0
GDPD2	0.0149731	0.35808		10	37	0	NA	0	NA	0
EFHB	0.0150178	0.35808		7	28	0	NA	0	NA	0
AQP3	0.015018	0.35808		10	37	0	NA	0	NA	0
TMEM173	0.0150303	0.35808		10	37	0	NA	0	NA	0
SCAF11	0.0150682	0.35808		9	33	0	NA	0	NA	0
SERPINB1	0.0150844	0.35808		8	30	1	mm10	0	NA	1
MYOZ3	0.0150876	0.35808		9	37	0	NA	0	NA	0
RP11_192H23.4	0.0153605	0.3639		10	38	1	nanGal1	0	NA	1
CD244	0.015525	0.367138		9	36	1	nanGal1	0	NA	1
BPIFA3	0.0155818	0.367819		10	34	0	NA	0	NA	0
ZKSCAN4	0.0157265	0.369956		5	30	1	perManBai1	1	cavPor3	1
ARV1	0.0157285	0.369956		10	37	0	NA	0	NA	0
ODF3L1	0.0157745	0.370359		10	35	1	hetGla2	0	NA	1
CCR9	0.0158277	0.370359		9	37	0	NA	0	NA	0
SBF2	0.0158555	0.370359		9	28	1	mm10	0	NA	1
DENND1A	0.0158581	0.370359		9	27	0	NA	0	NA	0
C4orf51	0.0158863	0.370362		10	37	4	micOch1;nanGal1;hetGla2;conCri1	6	turTru2;orcOrc1;balAcu1;cerSim1;canFam3;odoRosDiv1	4
IQCA1P1	0.0159804	0.370849		8	34	1	hetGla2	3	turTru2;orcOrc1;balAcu1	1
PTAFR	0.0159856	0.370849		10	36	0	NA	0	NA	0
NDUFS7	0.0160025	0.370849		10	28	0	NA	0	NA	0
MT1M	0.0160198	0.370849		6	25	3	micOch1;nanGal1;myoDav1	2	calJac3;tarSyr2	3
DIO2	0.0161342	0.372842		8	34	0	NA	0	NA	0
SYCP2	0.0163611	0.376448		9	29	3	micOch1;nanGal1;chrAsi1	1	panPan1	3
TPD52L3	0.0163726	0.376448		10	34	4	nanGal1;hetGla2;conCri1;chrAsi1	4	calJac3;saiBol1;cavPor3;octDeg1	4
MAML1	0.0163873	0.376448		9	29	0	NA	0	NA	0
MANSC1	0.0164046	0.376448		9	37	0	NA	0	NA	0
CD164	0.016446	0.376743		10	35	0	NA	0	NA	0
CCDC54	0.0165022	0.377373		9	36	2	nanGal1;hetGla2	3	orcOrc1;balAcu1;felCat8	2
C19orf84	0.0165314	0.377385		8	36	0	NA	0	NA	0
FBLIM1	0.0166644	0.379765		8	27	1	mm10	0	NA	1
C21orf2	0.0167526	0.381113		9	33	0	NA	0	NA	0
CES1	0.0167949	0.381418		9	23	2	nanGal1;hetGla2	1	orcOrc1	2
USP33	0.0169195	0.383586		9	35	0	NA	0	NA	0
PPP1R32	0.0169588	0.383816		7	34	1	hetGla2	1	cavPor3	1
LRRC63	0.0171348	0.387135		7	34	1	hetGla2	1	equCab2	1
TEX37	0.017304	0.390212		9	34	1	hetGla2	1	balAcu1	1
NANOS3	0.0173302	0.390212		10	36	0	NA	0	NA	0
DKK4	0.017455	0.39235		10	38	3	eptFus1;myoDav1;myoLuc2	0	NA	1
ZNF133	0.0175788	0.39446		9	31	2	mm10;myoDav1	0	NA	2
BFSP1	0.0176844	0.396154		8	32	2	nanGal1;conCri1	0	NA	2
FBN3	0.0177335	0.39658		10	28	9	micOch1;perManBai1;mm10;nanGal1;hetGla2;eptFus1;myoDav1;myoLuc2;conCri1	3	rn6;cavPor3;ochPri3	6
MTBP	0.0177736	0.396802		9	31	0	NA	0	NA	0
IL18BP	0.0179071	0.399108		10	37	0	NA	0	NA	0
COMMD3	0.0180771	0.402215		10	34	1	conCri1	0	NA	1
THEGL	0.0181402	0.402497		8	27	0	NA	0	NA	0
C19orf54	0.0181509	0.402497		8	37	0	NA	0	NA	0
PADI6	0.0182331	0.403641		9	35	1	chrAsi1	1	bisBis1	1
SLC10A6	0.018295	0.40424		9	33	0	NA	0	NA	0
RAD51D	0.0183434	0.40424		9	34	0	NA	0	NA	0
ZC3H12B	0.0183522	0.40424		8	34	0	NA	0	NA	0
ANKRD53	0.0184513	0.405744		9	37	2	nanGal1;hetGla2	0	NA	2
SPATA45	0.0186242	0.40871		10	36	1	hetGla2	1	orcOrc1	1
KCNK9	0.0186482	0.40871		7	26	0	NA	0	NA	0
PBDC1	0.018754	0.410345		6	27	0	NA	0	NA	0
ACOT13	0.0188568	0.411909		10	34	0	NA	0	NA	0
FAM63A	0.0189771	0.413851		10	35	0	NA	0	NA	0
CAMK1G	0.0190151	0.413996		8	32	0	NA	0	NA	0
ATP10A	0.0191468	0.416173		7	26	1	myoDav1	0	NA	1
FAM110C	0.0192521	0.416401		7	20	2	mm10;eptFus1	1	canFam3	2
SCEL	0.0192832	0.416401		10	34	8	perManBai1;mm10;nanGal1;hetGla2;eptFus1;myoDav1;myoLuc2;conCri1	13	cavPor3;oryCun2;ochPri3;camFer1;orcOrc1;balAcu1;felCat8;canFam3;musFur1;pteAle1;pteVam1;loxAfr3;triMan1	6
CFAP97	0.019303	0.416401		9	38	0	NA	0	NA	0
LCA5	0.0193133	0.416401		10	33	0	NA	0	NA	0
PCSK4	0.0193153	0.416401		10	25	1	hetGla2	1	panPan1	1
STOML1	0.0193641	0.41677		10	38	2	myoDav1;myoLuc2	0	NA	1
RBM23	0.0195451	0.419327		9	37	4	perManBai1;mm10;nanGal1;chrAsi1	3	rn6;cavPor3;octDeg1	4
ARMCX2	0.0195598	0.419327		9	34	0	NA	0	NA	0
CCDC38	0.0196102	0.419327		10	34	1	conCri1	0	NA	1
GPR62	0.0196418	0.419327		8	24	1	myoLuc2	0	NA	1
CCDC137	0.019642	0.419327		8	33	0	NA	0	NA	0
WDSUB1	0.0196755	0.419361		10	33	0	NA	0	NA	0
PLK1	0.0198307	0.421986		9	34	0	NA	0	NA	0
C6orf222	0.0199008	0.422795		10	36	4	eptFus1;myoDav1;myoLuc2;conCri1	0	NA	2
RNF151	0.0199604	0.42333		10	35	0	NA	0	NA	0
C4orf33	0.0200021	0.42333		7	35	1	nanGal1	0	NA	1
PDE5A	0.0200224	0.42333		6	33	0	NA	0	NA	0
C18orf63	0.0201131	0.424567		9	34	0	NA	0	NA	0
CLPB	0.020207	0.425335		9	32	0	NA	0	NA	0
PLBD2	0.0202572	0.425335		7	33	1	conCri1	0	NA	1
C1orf56	0.0202711	0.425335		8	34	1	hetGla2	1	equCab2	1
HLA_DQA1	0.0202787	0.425335		9	28	1	chrAsi1	0	NA	1
FAM13B	0.0203948	0.426592		8	32	0	NA	0	NA	0
C21orf62	0.0204126	0.426592		8	37	1	micOch1	0	NA	1
TSC1	0.0204357	0.426592		8	33	0	NA	0	NA	0
REEP6	0.0205767	0.428855		10	28	0	NA	0	NA	0
KIAA1524	0.0209787	0.43627		9	36	0	NA	0	NA	0
METTL7B	0.0210118	0.43627		8	36	2	myoDav1;conCri1	1	odoRosDiv1	2
C3orf84	0.0210319	0.43627		10	35	0	NA	0	NA	0
HAGHL	0.0210912	0.436813		8	32	3	hetGla2;myoDav1;chrAsi1	4	tarSyr2;otoGar3;loxAfr3;triMan1	3
LCE2D	0.021217	0.437694		7	28	3	micOch1;nanGal1;conCri1	1	rhiRox1	3
SCGB2A1	0.0212174	0.437694		6	32	1	mm10	0	NA	1
PROCA1	0.0212334	0.437694		10	34	1	hetGla2	0	NA	1
ADNP2	0.0213841	0.440112		7	34	0	NA	0	NA	0
SCARB2	0.021641	0.444705		7	32	0	NA	0	NA	0
PPP6R2	0.0218297	0.447883		10	27	1	conCri1	0	NA	1
LY86	0.0219627	0.449911		10	31	0	NA	0	NA	0
BTF3	0.0220275	0.450538		9	32	0	NA	0	NA	0
GPR158	0.0221217	0.451762		9	29	0	NA	0	NA	0
ALPK1	0.0222139	0.452683		7	31	0	NA	0	NA	0
ZNF660	0.0222927	0.452683		8	38	2	perManBai1;nanGal1	0	NA	2
OTOS	0.0222999	0.452683		10	32	1	conCri1	0	NA	1
C22orf46	0.0223042	0.452683		10	38	0	NA	1	calJac3	0
DEFB135	0.0225423	0.456811		9	30	0	NA	0	NA	0
C9orf24	0.0225889	0.457053		9	33	1	nanGal1	0	NA	1
RBM12	0.0226878	0.457653		9	35	1	chrAsi1	1	speTri2	1
MILR1	0.0227138	0.457653		9	32	5	perManBai1;mm10;hetGla2;conCri1;chrAsi1	6	speTri2;cavPor3;octDeg1;oryCun2;ochPri3;odoRosDiv1	5
TRH	0.0227255	0.457653		7	30	1	hetGla2	1	balAcu1	1
NXPE4	0.0228023	0.457653		5	34	1	conCri1	6	panHod1;bosTau8;bisBis1;capHir1;felCat8;musFur1	1
ARL14	0.0228158	0.457653		10	37	1	conCri1	0	NA	1
FCHO1	0.022827	0.457653		9	31	1	eptFus1	0	NA	1
ZNF112	0.0229182	0.458781		10	34	1	micOch1	0	NA	1
AC069063.2	0.0231541	0.4628		8	33	7	micOch1;perManBai1;mm10;nanGal1;hetGla2;myoLuc2;conCri1	4	otoGar3;octDeg1;ochPri3;odoRosDiv1	6
CHGA	0.0232311	0.463637		10	32	0	NA	0	NA	0
VWCE	0.0234483	0.467263		8	29	0	NA	0	NA	0
ZAR1L	0.0235847	0.469272		9	30	1	chrAsi1	0	NA	1
DUSP9	0.0238702	0.473513		8	24	0	NA	0	NA	0
VSIG4	0.0238777	0.473513		9	30	1	chrAsi1	1	otoGar3	1
GABPB2	0.0239057	0.473513		10	30	1	conCri1	0	NA	1
FLYWCH1	0.0239551	0.473779		8	29	1	mm10	0	NA	1
ZNF215	0.0241386	0.476693		9	35	4	micOch1;mm10;nanGal1;hetGla2	4	tarSyr2;octDeg1;oryCun2;triMan1	4
ACTR10	0.0241825	0.476845		9	33	1	conCri1	0	NA	1
CRISP2	0.02433	0.479036		7	35	1	hetGla2	0	NA	1
TTC29	0.0245642	0.482924		10	33	0	NA	0	NA	0
NXNL1	0.0246362	0.483618		8	29	2	nanGal1;chrAsi1	1	odoRosDiv1	2
SEMA3E	0.0247411	0.48469		10	29	0	NA	0	NA	0
FTHL17	0.0247644	0.48469		10	26	1	nanGal1	1	oryCun2	1
CXorf38	0.0248355	0.485061		8	28	0	NA	0	NA	0
DEAF1	0.024857	0.485061		7	25	1	mm10	0	NA	1
EPPIN_WFDC6	0.0249544	0.486241		10	36	3	nanGal1;hetGla2;conCri1	1	canFam3	3
C14orf79	0.0250253	0.486903		9	30	2	myoDav1;conCri1	2	otoGar3;ochPri3	2
WDR63	0.0251278	0.488175		7	33	3	micOch1;perManBai1;mm10	0	NA	2
C5orf49	0.0252549	0.489922		8	22	0	NA	0	NA	0
ZRSR2	0.0252921	0.489922		10	32	0	NA	0	NA	0
LYZL4	0.0253683	0.490677		10	35	1	hetGla2	0	NA	1
HPS5	0.0254473	0.491483		9	31	0	NA	0	NA	0
U2AF1L4	0.0254946	0.491677		10	37	5	hetGla2;eptFus1;myoDav1;myoLuc2;conCri1	5	tarSyr2;otoGar3;cavPor3;octDeg1;ochPri3	3
C2orf16	0.0255683	0.492377		6	23	4	micOch1;mm10;hetGla2;myoDav1	4	papAnu2;cavPor3;orcOrc1;panHod1	4
MT_ND4L	0.0256747	0.493703		6	37	1	myoLuc2	1	otoGar3	1
ACAD9	0.0257428	0.494039		6	26	0	NA	0	NA	0
GRAMD4	0.0257671	0.494039		6	25	1	myoDav1	0	NA	1
MGARP	0.026243	0.502432		10	34	2	eptFus1;conCri1	0	NA	2
FOXR1	0.0263902	0.504457		9	37	0	NA	0	NA	0
PLAGL2	0.0264254	0.504457		9	38	0	NA	0	NA	0
IFI30	0.0264856	0.504875		10	35	1	mm10	0	NA	1
LYPD6B	0.0265688	0.505345		10	30	0	NA	0	NA	0
TCEAL1	0.0266159	0.505345		10	35	1	hetGla2	0	NA	1
BTC	0.0266254	0.505345		8	34	0	NA	0	NA	0
MPC1	0.0268375	0.507716		6	23	0	NA	0	NA	0
BHMG1	0.0268528	0.507716		10	33	2	eptFus1;chrAsi1	0	NA	2
FNDC1	0.0268943	0.507716		6	26	1	micOch1	2	oryCun2;ochPri3	1
RGS20	0.0269045	0.507716		10	27	1	hetGla2	1	speTri2	1
C19orf12	0.0269989	0.508768		9	34	0	NA	0	NA	0
KIAA1217	0.0271401	0.510626		8	31	0	NA	0	NA	0
RNMT	0.027175	0.510626		10	35	0	NA	0	NA	0
DZIP1L	0.0272437	0.510758		8	34	4	nanGal1;eptFus1;myoDav1;myoLuc2	1	tarSyr2	2
GABRD	0.0273004	0.510758		8	30	0	NA	0	NA	0
BAALC	0.027322	0.510758		5	20	0	NA	0	NA	0
CPLX3	0.0273645	0.510758		10	35	1	chrAsi1	0	NA	1
TMEM254	0.0273904	0.510758		10	31	1	conCri1	0	NA	1
TIMP1	0.0274251	0.510758		9	34	0	NA	0	NA	0
GTSF1L	0.0274534	0.510758		7	37	1	nanGal1	1	calJac3	1
TMEM120B	0.0275186	0.511248		9	28	1	conCri1	0	NA	1
GOLGB1	0.0276269	0.512537		8	35	0	NA	0	NA	0
HSD17B1	0.0282504	0.522943		8	29	0	NA	0	NA	0
TOR1AIP1	0.0282672	0.522943		7	32	1	myoLuc2	0	NA	1
AGTRAP	0.0283305	0.523379		9	37	0	NA	0	NA	0
GPRIN3	0.028458	0.524998		8	35	2	hetGla2;myoLuc2	0	NA	2
FAM171B	0.0285797	0.526345		8	34	2	micOch1;myoDav1	0	NA	2
RFX8	0.0286109	0.526345		10	33	1	hetGla2	3	panPan1;turTru2;orcOrc1	1
ALDH3A2	0.0292374	0.537121		9	36	0	NA	0	NA	0
FAM170A	0.0294164	0.539113		9	38	0	NA	0	NA	0
DDX58	0.029437	0.539113		9	33	2	conCri1;chrAsi1	3	turTru2;orcOrc1;balAcu1	2
TAF7L	0.0294883	0.539113		10	34	3	nanGal1;hetGla2;conCri1	2	octDeg1;felCat8	3
ZNF581	0.0295096	0.539113		8	31	4	micOch1;perManBai1;mm10;nanGal1	1	rn6	3
DHRS7	0.0295656	0.539389		9	36	0	NA	0	NA	0
CACNA1E	0.0296286	0.539789		7	22	0	NA	0	NA	0
C4A	0.0297737	0.541685		6	24	2	mm10;myoDav1	0	NA	2
ARGLU1	0.0298432	0.542199		10	37	0	NA	0	NA	0
MSH5_SAPCD1	0.030468	0.552788		10	38	0	NA	0	NA	0
MTL5	0.0306227	0.554831		7	28	0	NA	0	NA	0
GLIPR1	0.0311632	0.563848		9	36	0	NA	0	NA	0
CDK4	0.0313936	0.567239		10	37	0	NA	0	NA	0
WDR87	0.0314534	0.567541		7	27	3	mm10;eptFus1;conCri1	0	NA	3
ZNF491	0.0315417	0.568356		7	27	6	perManBai1;mm10;nanGal1;hetGla2;myoLuc2;conCri1	16	panTro4;rheMac3;papAnu2;chlSab2;rhiRox1;calJac3;speTri2;rn6;octDeg1;turTru2;equCab2;cerSim1;felCat8;canFam3;odoRosDiv1;pteVam1	6
C12orf73	0.0316479	0.56949		10	38	1	mm10	0	NA	1
CLIP1	0.0318261	0.571619		10	36	1	conCri1	0	NA	1
BATF2	0.0318531	0.571619		9	37	0	NA	0	NA	0
HYI	0.0318964	0.571619		8	27	0	NA	0	NA	0
SMC4	0.0321366	0.574837		8	34	1	nanGal1	0	NA	1
ACRBP	0.0321633	0.574837		10	34	0	NA	0	NA	0
AREG	0.0323276	0.576212		10	35	0	NA	0	NA	0
SRRM2	0.0323546	0.576212		8	34	0	NA	0	NA	0
DDX53	0.0323715	0.576212		9	26	5	micOch1;perManBai1;mm10;nanGal1;hetGla2	3	rn6;orcOrc1;felCat8	4
SPATA16	0.0324953	0.577061		8	31	0	NA	0	NA	0
ERGIC2	0.0325068	0.577061		10	34	0	NA	0	NA	0
SIVA1	0.0325696	0.577399		8	28	0	NA	0	NA	0
PGF	0.0327817	0.580268		10	37	0	NA	0	NA	0
CUZD1	0.0328196	0.580268		8	36	3	eptFus1;myoDav1;chrAsi1	1	camFer1	2
GSAP	0.0328741	0.580452		9	27	0	NA	0	NA	0
KIAA0087	0.0332462	0.586237		10	37	10	micOch1;perManBai1;mm10;nanGal1;hetGla2;eptFus1;myoDav1;myoLuc2;conCri1;chrAsi1	24	rheMac3;macFas5;papAnu2;chlSab2;calJac3;tarSyr2;otoGar3;cavPor3;oryCun2;ochPri3;turTru2;orcOrc1;balAcu1;panHod1;bosTau8;bisBis1;capHir1;equCab2;cerSim1;felCat8;canFam3;musFur1;odoRosDiv1;pteAle1	7
PODXL2	0.0333885	0.587959		10	31	0	NA	0	NA	0
MTMR8	0.0334807	0.588795		7	28	6	micOch1;perManBai1;mm10;nanGal1;hetGla2;myoLuc2	7	otoGar3;rn6;octDeg1;ochPri3;vicPac2;felCat8;canFam3	5
SCNN1A	0.0335402	0.589055		9	26	0	NA	0	NA	0
PRAM1	0.0335982	0.589287		10	31	1	hetGla2	4	octDeg1;turTru2;orcOrc1;balAcu1	1
KCNU1	0.0338114	0.59224		6	27	0	NA	0	NA	0
CCDC102B	0.0339783	0.593758		9	30	3	micOch1;perManBai1;mm10	1	ochPri3	2
TDRD15	0.0339883	0.593758		9	34	1	chrAsi1	5	tarSyr2;vicPac2;turTru2;orcOrc1;balAcu1	1
PPP1R15B	0.0341778	0.596279		9	30	0	NA	0	NA	0
RSAD2	0.034484	0.600825		5	31	0	NA	0	NA	0
ZC3HAV1	0.0345884	0.600839		9	32	0	NA	0	NA	0
TRIOBP	0.0346173	0.600839		9	37	0	NA	0	NA	0
TMEM244	0.0346306	0.600839		10	35	7	micOch1;perManBai1;mm10;hetGla2;eptFus1;conCri1;chrAsi1	5	otoGar3;canFam3;odoRosDiv1;pteAle1;triMan1	6
TMCO5A	0.0346673	0.600839		10	34	1	hetGla2	0	NA	1
LGALS2	0.0351284	0.607997		10	36	3	eptFus1;myoDav1;myoLuc2	0	NA	1
CPA5	0.0351726	0.607997		10	36	1	hetGla2	0	NA	1
GPKOW	0.0360676	0.622651		8	30	0	NA	0	NA	0
USP29	0.0361463	0.623193		5	25	1	chrAsi1	8	oryCun2;vicPac2;camFer1;panHod1;bosTau8;bisBis1;capHir1;equCab2	1
LDLRAD2	0.0362158	0.623379		9	29	3	eptFus1;myoDav1;chrAsi1	2	orcOrc1;triMan1	2
MINOS1	0.0362518	0.623379		10	35	0	NA	0	NA	0
C2orf80	0.0363173	0.623692		10	37	0	NA	0	NA	0
CD96	0.0365724	0.627255		8	32	1	hetGla2	3	calJac3;turTru2;orcOrc1	1
PLAC1	0.0369304	0.632572		10	35	0	NA	0	NA	0
TRIM44	0.0371353	0.635254		8	23	1	conCri1	0	NA	1
CNGB3	0.037284	0.636972		9	35	2	nanGal1;chrAsi1	1	balAcu1	2
TWISTNB	0.0373424	0.637142		8	33	3	eptFus1;myoDav1;myoLuc2	0	NA	1
FAM186B	0.037553	0.639908		10	38	1	hetGla2	3	turTru2;orcOrc1;balAcu1	1
NELFE	0.0376963	0.641519		9	37	0	NA	0	NA	0
GAL	0.0377604	0.641684		8	27	0	NA	0	NA	0
DHTKD1	0.0378034	0.641684		7	31	1	nanGal1	0	NA	1
EMR3	0.0380035	0.643287		7	27	1	nanGal1	0	NA	1
FRMPD2	0.0380159	0.643287		8	31	3	eptFus1;myoDav1;myoLuc2	2	canFam3;triMan1	1
PHF21B	0.0380444	0.643287		8	27	0	NA	0	NA	0
TRMT1L	0.0381224	0.643779		9	32	1	nanGal1	0	NA	1
SH3BGR	0.0383006	0.645235		8	32	0	NA	0	NA	0
HIST1H3E	0.0383066	0.645235		8	28	0	NA	0	NA	0
CMIP	0.0384396	0.646226		10	26	0	NA	0	NA	0
AZU1	0.0384982	0.646226		5	25	3	hetGla2;myoDav1;myoLuc2	3	musFur1;odoRosDiv1;lepWed1	2
RDH8	0.0385125	0.646226		10	33	0	NA	0	NA	0
SLC27A3	0.0387187	0.648859		8	26	0	NA	0	NA	0
ZGRF1	0.0388986	0.651044		9	32	9	micOch1;perManBai1;mm10;nanGal1;hetGla2;myoDav1;myoLuc2;conCri1;chrAsi1	13	tarSyr2;otoGar3;speTri2;rn6;cavPor3;vicPac2;camFer1;canFam3;musFur1;odoRosDiv1;lepWed1;pteAle1;pteVam1	7
GPR179	0.0390325	0.652457		9	30	3	micOch1;nanGal1;conCri1	2	calJac3;musFur1	3
MICAL2	0.0394213	0.65812		9	36	0	NA	0	NA	0
OTOP1	0.0395268	0.658786		7	24	0	NA	0	NA	0
ZHX2	0.0395612	0.658786		9	30	0	NA	0	NA	0
DXO	0.0396448	0.659344		9	38	1	nanGal1	0	NA	1
MYLPF	0.0398295	0.661365		10	34	0	NA	0	NA	0
HIST1H2BL	0.039903	0.661365		8	27	1	chrAsi1	0	NA	1
CISD3	0.0399169	0.661365		10	36	0	NA	0	NA	0
RP11_745O10.4	0.0401019	0.663585		9	35	0	NA	0	NA	0
EPPIN	0.0401628	0.663585		10	36	2	nanGal1;conCri1	1	canFam3	2
LAMP3	0.040202	0.663585		10	36	0	NA	0	NA	0
DZANK1	0.0403273	0.66482		10	32	0	NA	1	bosTau8	0
PRSS38	0.040663	0.669516		7	34	0	NA	0	NA	0
MSMB	0.0407786	0.670318		7	35	2	mm10;nanGal1	6	turTru2;orcOrc1;canFam3;musFur1;odoRosDiv1;lepWed1	2
CST9	0.0408135	0.670318		6	27	1	perManBai1	1	balAcu1	1
SLC20A1	0.0411591	0.675153		10	35	0	NA	0	NA	0
OTOA	0.0412243	0.675381		6	33	0	NA	0	NA	0
MAP1S	0.0413787	0.675738		7	27	2	nanGal1;hetGla2	2	cavPor3;octDeg1	2
ALDH3A1	0.0413852	0.675738		9	30	1	hetGla2	2	loxAfr3;triMan1	1
IQCF6	0.0414	0.675738		9	37	0	NA	0	NA	0
NUDT14	0.0414953	0.676455		8	34	1	eptFus1	1	ochPri3	1
ARFGAP1	0.0416693	0.678453		8	35	0	NA	0	NA	0
USH2A	0.0419376	0.681545		9	25	3	micOch1;nanGal1;chrAsi1	1	papAnu2	3
PYGM	0.0419627	0.681545		10	33	0	NA	0	NA	0
TKTL1	0.0421064	0.682697		9	30	2	micOch1;nanGal1	0	NA	2
C4orf19	0.0421373	0.682697		10	36	0	NA	0	NA	0
TRIM68	0.0421978	0.682837		8	34	2	micOch1;chrAsi1	1	cavPor3	2
LRRC23	0.0423228	0.684019		10	36	0	NA	0	NA	0
CARS	0.0424671	0.685511		7	29	0	NA	0	NA	0
C7orf34	0.0425752	0.686415		9	33	5	micOch1;nanGal1;myoDav1;myoLuc2;conCri1	2	speTri2;cerSim1	4
KNG1	0.0432801	0.696925		9	37	0	NA	0	NA	0
SPATS1	0.0434122	0.697563		9	36	0	NA	0	NA	0
FZD6	0.0434256	0.697563		10	35	0	NA	0	NA	0
SELV	0.0435824	0.699229		7	26	0	NA	0	NA	0
RP11_244H3.4	0.0438767	0.703095		8	34	2	myoDav1;chrAsi1	0	NA	2
FMR1NB	0.0439916	0.703403		6	29	0	NA	1	saiBol1	0
CRYGN	0.0440027	0.703403		9	34	4	nanGal1;hetGla2;eptFus1;myoDav1	3	ponAbe2;calJac3;triMan1	3
TTF2	0.0443172	0.707368		10	31	1	chrAsi1	0	NA	1
LRTOMT	0.0443582	0.707368		10	36	0	NA	0	NA	0
PRSS57	0.0444951	0.708693		10	30	3	micOch1;nanGal1;hetGla2	2	cavPor3;octDeg1	3
ZNF613	0.0446654	0.709774		5	33	3	mm10;nanGal1;chrAsi1	1	cavPor3	3
LETM2	0.0446709	0.709774		10	34	2	nanGal1;hetGla2	0	NA	2
C1D	0.0447246	0.709774		10	36	0	NA	0	NA	0
HPS4	0.0449253	0.710941		10	36	1	chrAsi1	1	bisBis1	1
SDR42E2	0.0449881	0.710941		9	30	0	NA	0	NA	0
C12orf42	0.045001	0.710941		9	32	5	nanGal1;hetGla2;eptFus1;myoDav1;myoLuc2	8	octDeg1;balAcu1;panHod1;bosTau8;bisBis1;capHir1;canFam3;triMan1	3
KRR1	0.0450241	0.710941		9	38	2	myoDav1;myoLuc2	0	NA	1
C4orf46	0.045068	0.710941		9	34	1	hetGla2	0	NA	1
KCNK16	0.0454103	0.714687		9	36	2	micOch1;mm10	1	rn6	2
BCAN	0.045414	0.714687		9	30	0	NA	0	NA	0
IGSF11	0.0458179	0.720183		9	33	2	myoLuc2;conCri1	0	NA	2
AMZ1	0.0458726	0.720184		9	27	1	eptFus1	0	NA	1
PFKFB2	0.0463276	0.726461		9	37	0	NA	0	NA	0
RP11_315D16.2	0.04646	0.727671		7	31	1	hetGla2	2	cavPor3;octDeg1	1
FGD2	0.0465661	0.728271		9	29	1	hetGla2	0	NA	1
HACE1	0.0466089	0.728271		9	33	0	NA	0	NA	0
DCAF16	0.0467367	0.729402		10	37	6	micOch1;perManBai1;mm10;nanGal1;hetGla2;chrAsi1	4	otoGar3;rn6;cavPor3;octDeg1	5
DGKZ	0.0468703	0.730622		10	31	0	NA	0	NA	0
AL049794.1	0.0469561	0.731095		9	34	9	micOch1;perManBai1;mm10;nanGal1;hetGla2;eptFus1;myoDav1;myoLuc2;conCri1	22	calJac3;speTri2;rn6;cavPor3;octDeg1;oryCun2;turTru2;orcOrc1;balAcu1;panHod1;bosTau8;bisBis1;capHir1;equCab2;cerSim1;felCat8;canFam3;musFur1;odoRosDiv1;lepWed1;pteAle1;pteVam1	6
LMBRD1	0.0470981	0.732321		7	32	0	NA	0	NA	0
TREH	0.0471556	0.732321		8	34	2	hetGla2;myoLuc2	2	odoRosDiv1;lepWed1	2
KLK1	0.0472017	0.732321		9	33	1	chrAsi1	0	NA	1
NT5C1B	0.0474908	0.73594		10	37	1	hetGla2	2	turTru2;orcOrc1	1
ERAS	0.0475607	0.736157		10	37	1	chrAsi1	1	oryCun2	1
COQ3	0.0476211	0.736226		9	35	0	NA	0	NA	0
MIS18BP1	0.0482131	0.743838		9	30	1	mm10	7	tarSyr2;vicPac2;camFer1;orcOrc1;balAcu1;panHod1;bisBis1	1
HEXIM2	0.0482514	0.743838		10	37	1	hetGla2	2	cavPor3;octDeg1	1
SLAMF9	0.048324	0.743838		9	35	2	nanGal1;hetGla2	6	panPan1;tarSyr2;turTru2;orcOrc1;balAcu1;felCat8	2
TUBB1	0.0483393	0.743838		9	36	0	NA	0	NA	0
ACAP3	0.0484858	0.745221		7	24	1	myoDav1	0	NA	1
C18orf21	0.0486668	0.746679		7	34	0	NA	0	NA	0
ARMC5	0.048694	0.746679		9	27	0	NA	0	NA	0
SPANXN3	0.048835	0.74797		5	26	5	perManBai1;mm10;nanGal1;myoLuc2;conCri1	11	tarSyr2;cavPor3;oryCun2;orcOrc1;panHod1;bosTau8;capHir1;felCat8;canFam3;musFur1;lepWed1	5
GRP	0.0492974	0.753829		9	28	0	NA	0	NA	0
CBY3	0.0493758	0.753829		8	27	0	NA	0	NA	0
AARD	0.0493892	0.753829		8	25	2	hetGla2;chrAsi1	2	tarSyr2;otoGar3	2
MST1	0.0495266	0.755051		9	33	0	NA	0	NA	0
TTC31	0.0505464	0.769707		10	37	5	perManBai1;mm10;nanGal1;hetGla2;chrAsi1	11	rn6;octDeg1;oryCun2;ochPri3;turTru2;orcOrc1;balAcu1;panHod1;bosTau8;bisBis1;capHir1	5
PALB2	0.0506477	0.770359		10	34	6	micOch1;perManBai1;mm10;nanGal1;myoDav1;conCri1	1	rn6	5
C3orf52	0.0507109	0.770431		10	28	0	NA	0	NA	0
FCRL6	0.0509558	0.77326		9	31	8	micOch1;perManBai1;nanGal1;hetGla2;eptFus1;myoDav1;myoLuc2;conCri1	10	tarSyr2;otoGar3;rn6;octDeg1;ochPri3;camFer1;turTru2;orcOrc1;musFur1;pteVam1	5
PAGE4	0.0512487	0.776811		7	33	5	micOch1;nanGal1;eptFus1;myoDav1;myoLuc2	7	cavPor3;oryCun2;ochPri3;vicPac2;camFer1;balAcu1;canFam3	3
GPR97	0.0514308	0.778674		10	29	0	NA	0	NA	0
CEP72	0.051866	0.784268		9	29	2	nanGal1;hetGla2	2	octDeg1;orcOrc1	2
ANKDD1B	0.0519193	0.784268		10	37	6	perManBai1;eptFus1;myoDav1;myoLuc2;conCri1;chrAsi1	8	tarSyr2;vicPac2;orcOrc1;balAcu1;panHod1;bosTau8;bisBis1;canFam3	4
TSR3	0.0520467	0.78441		7	32	0	NA	0	NA	0
CCDC116	0.0520478	0.78441		9	33	2	hetGla2;myoDav1	0	NA	2
B3GNT6	0.0522916	0.785467		8	27	3	eptFus1;myoDav1;conCri1	4	turTru2;orcOrc1;pteAle1;pteVam1	2
NT5C1B_RDH14	0.0523549	0.785467		10	36	1	hetGla2	3	cavPor3;turTru2;orcOrc1	1
CXorf58	0.0524318	0.785467		9	31	1	hetGla2	0	NA	1
NFE2L2	0.0524458	0.785467		10	37	1	conCri1	0	NA	1
SFTPB	0.0524553	0.785467		10	34	0	NA	0	NA	0
CYP51A1	0.0524758	0.785467		9	36	0	NA	0	NA	0
PTGER1	0.0531874	0.795216		8	22	0	NA	0	NA	0
TIMD4	0.053386	0.79728		8	34	0	NA	1	loxAfr3	0
PDE6C	0.0535544	0.798414		10	33	1	chrAsi1	0	NA	1
ITSN1	0.0535832	0.798414		6	32	1	myoDav1	0	NA	1
RP11_432B6.3	0.0536441	0.798418		10	33	0	NA	0	NA	0
RP11_136C24.3	0.0537145	0.798564		10	38	2	mm10;chrAsi1	7	ochPri3;turTru2;orcOrc1;balAcu1;musFur1;odoRosDiv1;lepWed1	2
NPFFR2	0.0538178	0.799197		10	34	1	hetGla2	1	canFam3	1
FAM122C	0.0538948	0.799439		10	31	2	hetGla2;myoDav1	2	cavPor3;octDeg1	2
AGR3	0.0539639	0.799565		9	34	2	nanGal1;hetGla2	4	vicPac2;felCat8;odoRosDiv1;lepWed1	2
TNFSF11	0.0541488	0.801402		9	35	0	NA	0	NA	0
TXNL4A	0.0545417	0.805418		9	33	0	NA	0	NA	0
CRYZ	0.0545424	0.805418		9	35	0	NA	0	NA	0
MGAT4D	0.0551272	0.813141		9	31	2	nanGal1;hetGla2	4	calJac3;turTru2;orcOrc1;felCat8	2
ZNF268	0.0553226	0.815111		5	31	3	eptFus1;myoDav1;myoLuc2	7	tarSyr2;speTri2;cavPor3;octDeg1;oryCun2;ochPri3;camFer1	1
CCL26	0.0555852	0.817449		9	33	2	nanGal1;hetGla2	3	tarSyr2;ochPri3;triMan1	2
HMGN5	0.0556054	0.817449		10	28	1	hetGla2	1	octDeg1	1
CLEC19A	0.0560212	0.822644		10	37	3	mm10;hetGla2;conCri1	5	rn6;cavPor3;octDeg1;ochPri3;pteVam1	3
DEFB121	0.0565597	0.829626		9	35	3	perManBai1;mm10;nanGal1	2	rn6;musFur1	3
ATP6V1E2	0.0566848	0.830536		10	38	0	NA	0	NA	0
MAGED1	0.0567606	0.830723		8	20	0	NA	0	NA	0
FAM180B	0.0568632	0.831301		10	38	4	micOch1;perManBai1;mm10;conCri1	1	rn6	3
BLK	0.057088	0.831959		8	32	0	NA	0	NA	0
NUDT16L1	0.0571361	0.831959		9	26	0	NA	0	NA	0
SEC61A2	0.0572968	0.831959		10	37	0	NA	0	NA	0
PRLH	0.0574476	0.831959		9	37	0	NA	0	NA	0
TMEM18	0.057509	0.831959		9	32	1	nanGal1	0	NA	1
MCPH1	0.0575179	0.831959		7	31	2	eptFus1;myoDav1	0	NA	1
GIMAP5	0.0575795	0.831959		7	29	0	NA	0	NA	0
ZNF548	0.0576593	0.831959		6	25	5	micOch1;perManBai1;mm10;myoDav1;myoLuc2	6	balAcu1;felCat8;canFam3;musFur1;odoRosDiv1;pteAle1	3
TMEM98	0.057695	0.831959		10	37	0	NA	0	NA	0
MUSTN1	0.0577094	0.831959		10	37	0	NA	0	NA	0
GPHB5	0.0577587	0.831959		10	37	1	nanGal1	0	NA	1
APITD1	0.0577619	0.831959		10	37	0	NA	0	NA	0
YRDC	0.0577878	0.831959		6	20	0	NA	0	NA	0
PPP4R1	0.0579225	0.831959		9	32	1	nanGal1	0	NA	1
KLHL23	0.0581834	0.831959		10	37	0	NA	0	NA	0
SULT2B1	0.0582712	0.831959		8	26	0	NA	0	NA	0
TAS2R1	0.0583543	0.831959		10	33	2	hetGla2;conCri1	2	orcOrc1;triMan1	2
F12	0.0583961	0.831959		8	31	2	eptFus1;myoLuc2	2	orcOrc1;balAcu1	1
H1FOO	0.0587304	0.831959		10	28	3	micOch1;myoDav1;myoLuc2	0	NA	2
C1orf74	0.059497	0.831959		9	37	0	NA	0	NA	0
AGBL2	0.059538	0.831959		10	31	0	NA	0	NA	0
KRTAP27_1	0.0596055	0.831959		9	34	0	NA	1	rhiRox1	0
WDR77	0.0597932	0.831959		10	36	0	NA	0	NA	0
GNA14	0.0597933	0.831959		10	36	0	NA	0	NA	0
UBE2K	0.0597933	0.831959		10	36	0	NA	0	NA	0
FAM154A	0.0597935	0.831959		10	36	0	NA	0	NA	0
PDXK	0.0598099	0.831959		9	31	1	nanGal1	0	NA	1
SMIM5	0.0598441	0.831959		10	36	0	NA	0	NA	0
SLC17A9	0.0599785	0.831959		9	34	1	hetGla2	1	ochPri3	1
ZFP69	0.060038	0.831959		9	36	1	chrAsi1	0	NA	1
NUP93	0.060178	0.831959		9	36	0	NA	0	NA	0
CERK	0.0602696	0.831959		7	25	1	myoDav1	0	NA	1
C2CD2	0.0602791	0.831959		8	32	1	nanGal1	0	NA	1
WDR27	0.0603951	0.831959		7	29	3	perManBai1;nanGal1;myoLuc2	6	vicPac2;camFer1;orcOrc1;balAcu1;panHod1;musFur1	3
SFMBT2	0.0605493	0.831959		9	27	1	chrAsi1	0	NA	1
NOL8	0.0605936	0.831959		10	31	1	hetGla2	1	bosTau8	1
CYP2F1	0.060639	0.831959		7	28	2	hetGla2;eptFus1	6	ponAbe2;rhiRox1;saiBol1;otoGar3;orcOrc1;balAcu1	2
GPR50	0.0607803	0.831959		9	31	0	NA	0	NA	0
CRYGB	0.0610926	0.831959		5	36	0	NA	1	balAcu1	0
ELSPBP1	0.0611185	0.831959		7	32	4	perManBai1;mm10;nanGal1;conCri1	4	rn6;turTru2;orcOrc1;balAcu1	4
DAK	0.0611466	0.831959		9	35	1	myoLuc2	0	NA	1
HHIPL2	0.0611613	0.831959		7	32	3	hetGla2;eptFus1;myoLuc2	5	cavPor3;turTru2;orcOrc1;pteAle1;pteVam1	2
SCGN	0.0613849	0.831959		8	32	1	myoLuc2	0	NA	1
C9orf43	0.0613908	0.831959		10	37	2	hetGla2;conCri1	1	loxAfr3	2
EMR1	0.0614196	0.831959		8	27	0	NA	1	otoGar3	0
DECR1	0.0615344	0.831959		10	35	1	nanGal1	0	NA	1
IQCH	0.0615511	0.831959		10	31	1	hetGla2	1	vicPac2	1
ABHD16B	0.0615767	0.831959		8	23	0	NA	1	orcOrc1	0
ETAA1	0.0618649	0.831959		10	32	2	nanGal1;hetGla2	0	NA	2
ATP6V1F	0.0620034	0.831959		10	35	0	NA	0	NA	0
CD163	0.0620042	0.831959		8	31	0	NA	0	NA	0
RABL3	0.0621527	0.831959		10	35	0	NA	0	NA	0
ZNF248	0.0624074	0.831959		9	29	0	NA	0	NA	0
TNFRSF21	0.0624155	0.831959		8	35	0	NA	0	NA	0
CWC25	0.0624564	0.831959		10	35	0	NA	0	NA	0
NCBP2L	0.0625216	0.831959		9	37	5	perManBai1;mm10;nanGal1;hetGla2;conCri1	6	otoGar3;speTri2;rn6;ochPri3;camFer1;bosTau8	5
RP3_468K18.7	0.0625274	0.831959		10	35	0	NA	0	NA	0
C7orf25	0.0629295	0.831959		10	36	0	NA	0	NA	0
GGA2	0.063099	0.831959		10	33	1	chrAsi1	0	NA	1
ITGB3BP	0.0631405	0.831959		9	35	0	NA	0	NA	0
S100A6	0.0635526	0.831959		10	37	1	hetGla2	5	panHod1;bosTau8;bisBis1;capHir1;pteVam1	1
SNX11	0.0635969	0.831959		10	38	0	NA	0	NA	0
PSMA8	0.0637	0.831959		9	35	0	NA	0	NA	0
INSR	0.0639622	0.831959		9	29	0	NA	0	NA	0
PODXL	0.0640027	0.831959		10	33	2	conCri1;chrAsi1	2	canFam3;triMan1	2
ZNF277	0.0641513	0.831959		9	33	0	NA	0	NA	0
CLTCL1	0.0643495	0.831959		6	29	4	perManBai1;nanGal1;hetGla2;chrAsi1	6	otoGar3;rn6;vicPac2;equCab2;cerSim1;loxAfr3	4
RGL3	0.0643701	0.831959		9	28	1	hetGla2	0	NA	1
NOX1	0.0646071	0.831959		9	31	1	conCri1	2	orcOrc1;balAcu1	1
TMEM116	0.0646621	0.831959		10	34	0	NA	0	NA	0
TMEM45A	0.0647215	0.831959		10	34	1	nanGal1	0	NA	1
TEX14	0.0647405	0.831959		10	32	7	perManBai1;mm10;nanGal1;hetGla2;eptFus1;myoDav1;myoLuc2	5	chlSab2;turTru2;orcOrc1;balAcu1;felCat8	5
YWHAH	0.0648231	0.831959		10	38	1	chrAsi1	0	NA	1
LRRC69	0.0649436	0.831959		10	35	1	hetGla2	0	NA	1
MYH15	0.0649594	0.831959		9	31	9	micOch1;perManBai1;mm10;nanGal1;hetGla2;eptFus1;myoDav1;myoLuc2;conCri1	12	otoGar3;speTri2;rn6;cavPor3;octDeg1;oryCun2;ochPri3;orcOrc1;balAcu1;musFur1;odoRosDiv1;pteAle1	6
CNGA1	0.0649725	0.831959		10	34	0	NA	0	NA	0
GOLGA5	0.0650661	0.831959		10	35	0	NA	0	NA	0
NLN	0.0651564	0.831959		10	34	1	nanGal1	0	NA	1
LIM2	0.0652937	0.831959		9	35	0	NA	0	NA	0
HIST1H2BI	0.0656603	0.831959		9	35	1	mm10	0	NA	1
IFNGR1	0.0658088	0.831959		10	38	0	NA	0	NA	0
XYLB	0.0659165	0.831959		9	30	0	NA	0	NA	0
ZSWIM2	0.0662146	0.831959		9	32	1	hetGla2	0	NA	1
PRKAA2	0.0664629	0.831959		10	36	0	NA	0	NA	0
RPS19	0.0665382	0.831959		10	35	0	NA	0	NA	0
N4BP3	0.066543	0.831959		9	34	0	NA	0	NA	0
MROH9	0.0667136	0.831959		8	29	0	NA	0	NA	0
PRKAR2A	0.0669138	0.831959		5	22	1	hetGla2	0	NA	1
CD1E	0.0669273	0.831959		6	32	2	conCri1;chrAsi1	2	tarSyr2;camFer1	2
SLC1A7	0.0671135	0.831959		8	31	1	nanGal1	0	NA	1
SLC37A1	0.0671766	0.831959		9	31	0	NA	0	NA	0
CIZ1	0.0672256	0.831959		9	34	2	micOch1;nanGal1	1	cavPor3	2
AMD1	0.067227	0.831959		10	34	0	NA	0	NA	0
SASS6	0.0675276	0.831959		10	33	0	NA	0	NA	0
PNPLA7	0.067601	0.831959		6	24	1	hetGla2	5	ponAbe2;otoGar3;turTru2;orcOrc1;balAcu1	1
C1orf35	0.0680252	0.831959		9	31	3	eptFus1;myoDav1;myoLuc2	0	NA	1
SLC35B3	0.0680556	0.831959		10	31	0	NA	0	NA	0
LRRC9	0.0682157	0.831959		10	33	0	NA	0	NA	0
TMEM110_MUSTN1	0.0685069	0.831959		10	32	0	NA	0	NA	0
FAM198A	0.0685378	0.831959		9	34	0	NA	0	NA	0
B3GNT4	0.0685498	0.831959		8	36	2	nanGal1;conCri1	3	cavPor3;octDeg1;odoRosDiv1	2
DGKI	0.0688409	0.831959		7	32	0	NA	0	NA	0
TTLL9	0.0689505	0.831959		10	35	1	nanGal1	0	NA	1
RAI1	0.0691347	0.831959		8	26	0	NA	0	NA	0
PDE6B	0.069149	0.831959		8	23	0	NA	0	NA	0
LKAAEAR1	0.0692055	0.831959		6	22	1	nanGal1	0	NA	1
KIF2C	0.0692918	0.831959		10	35	1	nanGal1	0	NA	1
SERTAD4	0.0695655	0.831959		9	36	0	NA	0	NA	0
C4orf47	0.0696001	0.831959		10	32	0	NA	0	NA	0
POM121L2	0.0697752	0.831959		9	35	5	micOch1;perManBai1;mm10;hetGla2;chrAsi1	7	tarSyr2;otoGar3;rn6;turTru2;orcOrc1;balAcu1;canFam3	4
KIAA1143	0.0699388	0.831959		9	33	0	NA	0	NA	0
GAFA3	0.0700907	0.831959		9	36	6	perManBai1;mm10;nanGal1;myoDav1;conCri1;chrAsi1	13	calJac3;tarSyr2;otoGar3;speTri2;octDeg1;oryCun2;ochPri3;camFer1;equCab2;cerSim1;felCat8;canFam3;odoRosDiv1	6
PRR33	0.0702808	0.831959		7	26	0	NA	0	NA	0
C14orf169	0.0703174	0.831959		8	25	0	NA	0	NA	0
IFNB1	0.0703759	0.831959		10	37	0	NA	0	NA	0
MED13L	0.0704633	0.831959		10	33	0	NA	0	NA	0
TIGD7	0.0705468	0.831959		7	37	6	micOch1;perManBai1;mm10;nanGal1;hetGla2;myoLuc2	5	rn6;cavPor3;octDeg1;oryCun2;loxAfr3	5
GLIPR1L2	0.0707501	0.831959		10	33	0	NA	0	NA	0
IRF7	0.0707531	0.831959		8	30	5	perManBai1;mm10;nanGal1;hetGla2;eptFus1	11	speTri2;ochPri3;turTru2;orcOrc1;balAcu1;panHod1;bosTau8;bisBis1;musFur1;pteAle1;pteVam1	5
EGFR	0.0708683	0.831959		6	31	0	NA	0	NA	0
DCTN1	0.0708746	0.831959		10	32	0	NA	0	NA	0
C22orf29	0.0712534	0.831959		8	35	8	micOch1;perManBai1;mm10;nanGal1;hetGla2;eptFus1;myoDav1;conCri1	18	tarSyr2;otoGar3;rn6;cavPor3;octDeg1;vicPac2;camFer1;panHod1;bosTau8;capHir1;equCab2;felCat8;canFam3;musFur1;odoRosDiv1;lepWed1;pteAle1;pteVam1	6
GPN2	0.0712859	0.831959		10	32	0	NA	0	NA	0
PCNX	0.0714181	0.831959		9	29	0	NA	0	NA	0
MS4A7	0.0718654	0.831959		9	31	0	NA	0	NA	0
VARS2	0.0720717	0.831959		6	35	0	NA	0	NA	0
PRKRIP1	0.0720884	0.831959		10	31	0	NA	0	NA	0
ATP13A4	0.0723806	0.831959		9	31	0	NA	0	NA	0
SPATA32	0.0728111	0.831959		10	35	2	nanGal1;hetGla2	1	oryCun2	2
SFXN4	0.0729186	0.831959		7	30	2	micOch1;hetGla2	1	cavPor3	2
CACNA1F	0.0729191	0.831959		10	30	2	nanGal1;chrAsi1	0	NA	2
MOK	0.0729864	0.831959		8	33	1	hetGla2	0	NA	1
TMEM207	0.073595	0.831959		10	35	0	NA	1	panPan1	0
NUP210L	0.07369	0.831959		9	25	1	hetGla2	0	NA	1
ISOC2	0.0737101	0.831959		8	33	1	nanGal1	0	NA	1
TUBB	0.0739387	0.831959		9	34	1	nanGal1	0	NA	1
OXER1	0.0740165	0.831959		9	32	6	micOch1;perManBai1;mm10;nanGal1;hetGla2;conCri1	9	otoGar3;speTri2;rn6;cavPor3;octDeg1;oryCun2;turTru2;orcOrc1;balAcu1	5
RRAD	0.074135	0.831959		9	31	0	NA	0	NA	0
RACGAP1	0.0744024	0.831959		9	32	1	nanGal1	0	NA	1
TNFSF4	0.0744841	0.831959		10	34	0	NA	0	NA	0
FEM1C	0.0745883	0.831959		10	34	0	NA	0	NA	0
MMEL1	0.0746805	0.831959		6	29	0	NA	0	NA	0
CASS4	0.0746805	0.831959		10	33	0	NA	0	NA	0
SELP	0.0750811	0.831959		9	34	2	eptFus1;conCri1	0	NA	2
DIS3	0.0751528	0.831959		9	35	0	NA	1	ponAbe2	0
IFIT5	0.0752985	0.831959		6	35	1	hetGla2	2	octDeg1;ochPri3	1
KAZN	0.0753328	0.831959		7	27	1	myoDav1	1	felCat8	1
GUCY2C	0.0758096	0.831959		9	31	0	NA	0	NA	0
EXOSC8	0.0759058	0.831959		10	36	0	NA	0	NA	0
ARHGAP5	0.0759187	0.831959		9	31	0	NA	0	NA	0
UBAP1L	0.0760212	0.831959		7	24	1	chrAsi1	1	bosTau8	1
TAP2	0.0762269	0.831959		6	23	1	nanGal1	0	NA	1
SSPN	0.0764009	0.831959		8	26	0	NA	0	NA	0
MS4A15	0.0764341	0.831959		10	33	3	eptFus1;myoDav1;myoLuc2	1	canFam3	1
ZNF432	0.0766166	0.831959		8	27	3	mm10;hetGla2;conCri1	2	loxAfr3;triMan1	3
RGAG4	0.076674	0.831959		9	27	1	chrAsi1	1	speTri2	1
BEGAIN	0.0767861	0.831959		7	22	1	eptFus1	0	NA	1
WDR88	0.0767898	0.831959		8	29	1	myoLuc2	0	NA	1
ANKHD1_EIF4EBP3	0.0770115	0.831959		8	30	0	NA	0	NA	0
DLG1	0.0770133	0.831959		9	30	0	NA	0	NA	0
MAP6	0.0770929	0.831959		8	29	1	myoLuc2	2	rhiRox1;oryCun2	1
BAI3	0.0772127	0.831959		8	30	1	nanGal1	0	NA	1
DYX1C1	0.0777907	0.831959		8	30	1	nanGal1	0	NA	1
VAV3	0.0778008	0.831959		10	29	0	NA	0	NA	0
CASP6	0.0779586	0.831959		7	34	0	NA	0	NA	0
PHF7	0.0780336	0.831959		9	34	0	NA	0	NA	0
BBS9	0.0780398	0.831959		7	29	1	hetGla2	0	NA	1
ZNF226	0.0783893	0.831959		9	37	2	perManBai1;nanGal1	3	panPan1;oryCun2;ochPri3	2
LRRC25	0.0784273	0.831959		10	33	0	NA	0	NA	0
FBXW10	0.0784305	0.831959		9	31	1	hetGla2	1	vicPac2	1
CH25H	0.0786527	0.831959		10	35	1	nanGal1	0	NA	1
MAEL	0.0788225	0.831959		9	36	0	NA	0	NA	0
ZNF879	0.0789149	0.831959		8	37	0	NA	0	NA	0
WAPAL	0.0789677	0.831959		10	33	0	NA	0	NA	0
MTFR1	0.0789896	0.831959		10	33	3	eptFus1;myoDav1;myoLuc2	2	panHod1;capHir1	1
KLLN	0.0793134	0.831959		9	35	9	micOch1;perManBai1;mm10;nanGal1;hetGla2;eptFus1;myoDav1;myoLuc2;conCri1	11	tarSyr2;otoGar3;rn6;octDeg1;ochPri3;turTru2;orcOrc1;balAcu1;felCat8;musFur1;lepWed1	6
TMEM86B	0.0793986	0.831959		9	34	1	eptFus1	0	NA	1
EPCAM	0.0794137	0.831959		10	31	1	nanGal1	0	NA	1
HEATR5A	0.0795798	0.831959		9	25	1	nanGal1	0	NA	1
TSPAN32	0.0797706	0.831959		6	26	0	NA	0	NA	0
SVIP	0.0797793	0.831959		9	29	0	NA	0	NA	0
SPATA33	0.0799148	0.831959		8	33	0	NA	1	cerSim1	0
CEACAM6	0.0799172	0.831959		6	21	3	micOch1;perManBai1;nanGal1	1	camFer1	2
URB1	0.0799263	0.831959		8	29	0	NA	0	NA	0
CCDC105	0.0800235	0.831959		9	29	1	nanGal1	0	NA	1
CCDC185	0.0800993	0.831959		8	29	3	nanGal1;hetGla2;conCri1	2	cavPor3;octDeg1	3
AOC1	0.0802023	0.831959		8	30	0	NA	0	NA	0
SENP2	0.0803671	0.831959		10	34	1	chrAsi1	0	NA	1
C16orf90	0.080408	0.831959		10	36	1	hetGla2	3	orcOrc1;balAcu1;panHod1	1
DDX46	0.0804631	0.831959		9	31	0	NA	0	NA	0
NCOA3	0.0807538	0.831959		10	34	0	NA	0	NA	0
HMMR	0.0808696	0.831959		9	32	2	myoDav1;myoLuc2	0	NA	1
AKAP9	0.0809558	0.831959		7	28	1	myoDav1	0	NA	1
ZNF235	0.0809993	0.831959		9	33	0	NA	0	NA	0
IL1R2	0.0810906	0.831959		9	35	0	NA	0	NA	0
HINFP	0.0812231	0.831959		10	38	0	NA	0	NA	0
ABI1	0.0816697	0.831959		10	36	0	NA	0	NA	0
EPHX1	0.0819657	0.831959		9	33	1	myoDav1	0	NA	1
PPP1R36	0.0819982	0.831959		9	32	0	NA	0	NA	0
CH17_140K24.8	0.0823196	0.831959		10	35	3	nanGal1;myoLuc2;chrAsi1	3	equCab2;cerSim1;triMan1	3
C2orf70	0.0826345	0.831959		10	37	0	NA	2	turTru2;orcOrc1	0
THAP9	0.0826345	0.831959		10	38	4	micOch1;perManBai1;mm10;nanGal1	1	rn6	3
EFCAB8	0.082706	0.831959		8	34	2	nanGal1;hetGla2	5	chlSab2;vicPac2;camFer1;turTru2;orcOrc1	2
SHQ1	0.0833788	0.831959		8	32	0	NA	0	NA	0
ST6GALNAC5	0.0834925	0.831959		9	28	0	NA	0	NA	0
TXNDC2	0.0835057	0.831959		7	34	2	hetGla2;conCri1	8	rheMac3;macFas5;papAnu2;chlSab2;rhiRox1;calJac3;speTri2;camFer1	2
EGFL6	0.0836749	0.831959		10	30	1	conCri1	1	orcOrc1	1
ZNF784	0.0839029	0.831959		6	29	0	NA	0	NA	0
TNFRSF9	0.0839471	0.831959		10	35	1	conCri1	0	NA	1
RP1L1	0.0842766	0.831959		6	25	4	mm10;hetGla2;myoDav1;myoLuc2	14	rheMac3;macFas5;papAnu2;chlSab2;rhiRox1;calJac3;cavPor3;oryCun2;turTru2;orcOrc1;balAcu1;equCab2;cerSim1;pteAle1	3
RDH5	0.084327	0.831959		10	37	2	nanGal1;chrAsi1	0	NA	2
FOXN4	0.0844491	0.831959		8	35	1	hetGla2	1	vicPac2	1
PIN4	0.0845679	0.831959		9	31	0	NA	0	NA	0
ZCCHC14	0.0846591	0.831959		9	23	0	NA	0	NA	0
RP1_139D8.6	0.0846777	0.831959		8	37	0	NA	0	NA	0
CTD_3222D19.2	0.0849469	0.831959		9	30	0	NA	0	NA	0
SYNE4	0.085182	0.831959		10	37	2	conCri1;chrAsi1	2	bisBis1;loxAfr3	2
TXNDC11	0.0852565	0.831959		10	34	1	chrAsi1	0	NA	1
ZNF366	0.0852601	0.831959		9	34	0	NA	0	NA	0
CTD_2369P2.10	0.0852784	0.831959		10	36	0	NA	0	NA	0
DPH5	0.0855381	0.831959		10	36	0	NA	0	NA	0
SPTLC1	0.0856432	0.831959		9	29	0	NA	0	NA	0
ZNF230	0.0857011	0.831959		5	21	4	micOch1;perManBai1;nanGal1;conCri1	1	vicPac2	3
FLNB	0.0857635	0.831959		9	33	0	NA	0	NA	0
TTK	0.0859954	0.831959		9	33	1	mm10	0	NA	1
CEP85L	0.0861525	0.831959		10	38	0	NA	0	NA	0
CLSPN	0.0862599	0.831959		9	31	1	eptFus1	0	NA	1
IFT43	0.0864944	0.831959		10	33	0	NA	0	NA	0
CLNS1A	0.0866	0.831959		9	36	0	NA	0	NA	0
PTTG1IP	0.0867184	0.831959		9	28	0	NA	0	NA	0
CYLC1	0.0867742	0.831959		8	26	1	hetGla2	8	panPan1;calJac3;orcOrc1;panHod1;bosTau8;capHir1;cerSim1;musFur1	1
RIPPLY2	0.0868072	0.831959		8	27	1	nanGal1	0	NA	1
RGAG1	0.0868744	0.831959		10	33	4	eptFus1;myoDav1;myoLuc2;conCri1	2	calJac3;triMan1	2
CCDC160	0.0869347	0.831959		9	33	0	NA	0	NA	0
PCDHGB7	0.0869925	0.831959		6	25	1	nanGal1	0	NA	1
SIRPB1	0.0870578	0.831959		5	25	0	NA	1	cavPor3	0
KNSTRN	0.0871447	0.831959		10	32	0	NA	0	NA	0
DRD3	0.0871827	0.831959		9	36	0	NA	0	NA	0
CENPBD1	0.0873527	0.831959		8	34	6	micOch1;perManBai1;mm10;nanGal1;myoLuc2;conCri1	5	speTri2;cavPor3;octDeg1;oryCun2;pteVam1	5
MTG2	0.0874802	0.831959		9	38	0	NA	0	NA	0
GMEB2	0.0877019	0.831959		10	29	1	conCri1	0	NA	1
RPRD1A	0.0877225	0.831959		9	38	0	NA	0	NA	0
NIFK	0.0879018	0.831959		6	34	0	NA	0	NA	0
TRIM17	0.087906	0.831959		7	31	1	nanGal1	3	otoGar3;turTru2;orcOrc1	1
CARD10	0.0879507	0.831959		9	31	0	NA	0	NA	0
RFPL4B	0.0880088	0.831959		9	27	4	micOch1;hetGla2;conCri1;chrAsi1	7	otoGar3;octDeg1;panHod1;bosTau8;bisBis1;capHir1;loxAfr3	4
ZNF211	0.0880143	0.831959		5	31	2	eptFus1;myoDav1	4	turTru2;orcOrc1;balAcu1;pteVam1	1
UNC93A	0.0881392	0.831959		7	25	1	mm10	0	NA	1
RP11_176H8.1	0.0887215	0.831959		10	37	1	nanGal1	0	NA	1
EVI2A	0.0891131	0.831959		10	38	0	NA	0	NA	0
MAGEF1	0.0891266	0.831959		9	34	9	micOch1;mm10;nanGal1;hetGla2;eptFus1;myoDav1;myoLuc2;conCri1;chrAsi1	14	tarSyr2;otoGar3;rn6;octDeg1;oryCun2;ochPri3;vicPac2;camFer1;orcOrc1;balAcu1;equCab2;cerSim1;loxAfr3;triMan1	7
RAD51AP2	0.0892747	0.831959		8	28	2	perManBai1;mm10	2	panPan1;orcOrc1	2
HES3	0.0894928	0.831959		9	24	1	nanGal1	0	NA	1
FAM179B	0.0900571	0.831959		8	33	2	nanGal1;conCri1	1	equCab2	2
CACNA2D4	0.0901025	0.831959		7	29	2	nanGal1;chrAsi1	6	turTru2;orcOrc1;balAcu1;panHod1;bosTau8;capHir1	2
ZSCAN2	0.0901375	0.831959		9	32	0	NA	0	NA	0
NCAPD3	0.090384	0.831959		9	34	1	mm10	0	NA	1
DTD2	0.0904243	0.831959		10	35	1	nanGal1	0	NA	1
EPSTI1	0.0905907	0.831959		9	33	1	nanGal1	0	NA	1
ZNF789	0.0906811	0.831959		5	25	2	mm10;hetGla2	1	speTri2	2
RP11_795F19.5	0.0907375	0.831959		8	26	0	NA	0	NA	0
ZNF227	0.0909742	0.831959		8	36	4	perManBai1;nanGal1;conCri1;chrAsi1	4	rn6;oryCun2;ochPri3;loxAfr3	4
FAM170B	0.0910452	0.831959		9	33	2	myoDav1;myoLuc2	1	saiBol1	1
FAM71E1	0.0912306	0.831959		8	33	0	NA	0	NA	0
TESPA1	0.0915152	0.831959		10	35	1	conCri1	0	NA	1
FOPNL	0.091813	0.831959		10	34	0	NA	0	NA	0
IL26	0.0918343	0.831959		9	33	5	micOch1;perManBai1;mm10;nanGal1;hetGla2	6	tarSyr2;ochPri3;balAcu1;bosTau8;equCab2;loxAfr3	4
C14orf2	0.0919533	0.831959		10	37	0	NA	0	NA	0
SERPINB9	0.0924574	0.831959		5	34	2	eptFus1;myoDav1	3	octDeg1;turTru2;orcOrc1	1
MUC1	0.0924958	0.831959		8	31	0	NA	0	NA	0
ANGPTL5	0.0927959	0.831959		10	34	3	micOch1;mm10;conCri1	1	rn6	3
AS3MT	0.0935178	0.831959		10	34	4	hetGla2;myoDav1;myoLuc2;chrAsi1	5	calJac3;tarSyr2;cavPor3;orcOrc1;pteAle1	3
PHRF1	0.0935809	0.831959		9	29	1	myoLuc2	0	NA	1
PIK3C2G	0.0936554	0.831959		10	22	0	NA	0	NA	0
RPGRIP1	0.093709	0.831959		10	31	1	chrAsi1	1	panPan1	1
IFI6	0.0937743	0.831959		10	33	6	micOch1;perManBai1;mm10;nanGal1;hetGla2;conCri1	5	speTri2;rn6;cavPor3;octDeg1;ochPri3	5
PP2D1	0.0938927	0.831959		10	35	1	hetGla2	1	octDeg1	1
WBSCR28	0.0943027	0.831959		10	33	0	NA	0	NA	0
HSD17B11	0.0944139	0.831959		9	30	0	NA	0	NA	0
IL2RG	0.0944454	0.831959		10	33	0	NA	0	NA	0
TBC1D15	0.0944676	0.831959		9	33	0	NA	0	NA	0
FAM83C	0.0946039	0.831959		10	35	0	NA	0	NA	0
FAM24B	0.0950442	0.831959		6	37	1	conCri1	0	NA	1
TRMT5	0.0950519	0.831959		10	36	0	NA	0	NA	0
ALLC	0.0954315	0.831959		7	35	1	hetGla2	4	calJac3;turTru2;orcOrc1;balAcu1	1
BPIFC	0.0954591	0.831959		10	35	0	NA	0	NA	0
TMEM44	0.0955533	0.831959		9	33	0	NA	0	NA	0
FXN	0.0956224	0.831959		7	22	0	NA	0	NA	0
ALOX15B	0.0957512	0.831959		7	28	1	hetGla2	3	calJac3;vicPac2;balAcu1	1
ZNF222	0.0960676	0.831959		6	23	4	micOch1;perManBai1;nanGal1;conCri1	5	octDeg1;orcOrc1;balAcu1;bosTau8;loxAfr3	3
KIAA1875	0.0962724	0.831959		7	31	2	hetGla2;myoLuc2	10	ponAbe2;rheMac3;macFas5;rhiRox1;tarSyr2;speTri2;balAcu1;panHod1;pteAle1;pteVam1	2
AMICA1	0.096425	0.831959		10	34	0	NA	0	NA	0
RSPH3	0.0964918	0.831959		8	32	0	NA	0	NA	0
MUM1L1	0.0966695	0.831959		8	31	0	NA	0	NA	0
CYP2A6	0.0966806	0.831959		5	23	2	mm10;conCri1	5	turTru2;orcOrc1;balAcu1;pteAle1;pteVam1	2
TULP2	0.0967277	0.831959		10	34	1	perManBai1	2	tarSyr2;odoRosDiv1	1
C1orf64	0.0967571	0.831959		9	36	1	perManBai1	0	NA	1
DEFA6	0.0968477	0.831959		6	20	3	micOch1;perManBai1;chrAsi1	4	tarSyr2;cavPor3;cerSim1;triMan1	2
TACR3	0.0971021	0.831959		7	31	1	nanGal1	0	NA	1
LCE4A	0.0974919	0.831959		6	28	3	micOch1;myoDav1;conCri1	7	rhiRox1;tarSyr2;octDeg1;ochPri3;capHir1;canFam3;pteVam1	3
HIST4H4	0.097865	0.831959		9	37	2	myoDav1;myoLuc2	3	camFer1;pteAle1;pteVam1	1
FAM200B	0.0979742	0.831959		7	35	7	micOch1;perManBai1;mm10;hetGla2;eptFus1;myoLuc2;conCri1	13	speTri2;cavPor3;octDeg1;oryCun2;vicPac2;camFer1;turTru2;capHir1;felCat8;musFur1;pteAle1;pteVam1;triMan1	5
C12orf76	0.0980868	0.831959		9	35	1	micOch1	1	loxAfr3	1
C20orf96	0.0981175	0.831959		9	33	0	NA	0	NA	0
BRIX1	0.0982423	0.831959		9	33	0	NA	0	NA	0
PLVAP	0.0985258	0.831959		8	30	0	NA	0	NA	0
LACRT	0.0985469	0.831959		6	32	2	perManBai1;mm10	1	triMan1	2
GAPT	0.0986881	0.831959		8	36	0	NA	0	NA	0
GCNT7	0.0988866	0.831959		10	35	3	eptFus1;myoDav1;myoLuc2	6	rheMac3;macFas5;papAnu2;chlSab2;tarSyr2;ochPri3	1
CTU2	0.0991341	0.831959		8	34	0	NA	0	NA	0
OCEL1	0.0993656	0.831959		10	33	0	NA	0	NA	0
APLN	0.0994228	0.831959		10	33	7	micOch1;mm10;nanGal1;hetGla2;myoDav1;conCri1;chrAsi1	16	rn6;octDeg1;oryCun2;ochPri3;vicPac2;camFer1;orcOrc1;balAcu1;panHod1;bosTau8;capHir1;equCab2;cerSim1;musFur1;loxAfr3;triMan1	7
GOLGA2	0.0995859	0.831959		10	35	2	myoDav1;chrAsi1	0	NA	2
CCDC150	0.099945	0.831959		9	34	5	hetGla2;eptFus1;myoDav1;myoLuc2;conCri1	17	calJac3;otoGar3;cavPor3;octDeg1;ochPri3;vicPac2;camFer1;orcOrc1;balAcu1;panHod1;bosTau8;bisBis1;capHir1;cerSim1;musFur1;odoRosDiv1;lepWed1	3
KCP	0.0999511	0.831959		9	28	1	hetGla2	1	rhiRox1	1
FAM71E2	0.100016	0.831959		5	27	2	nanGal1;hetGla2	7	ponAbe2;rheMac3;macFas5;papAnu2;octDeg1;orcOrc1;equCab2	2
SHBG	0.100339	0.831959		10	38	2	nanGal1;chrAsi1	4	equCab2;cerSim1;pteAle1;pteVam1	2
LTK	0.100483	0.831959		10	35	5	eptFus1;myoDav1;myoLuc2;conCri1;chrAsi1	16	vicPac2;camFer1;turTru2;orcOrc1;balAcu1;panHod1;bosTau8;bisBis1;capHir1;felCat8;canFam3;musFur1;odoRosDiv1;lepWed1;pteAle1;pteVam1	3
ABCA6	0.100487	0.831959		8	31	3	eptFus1;myoDav1;myoLuc2	2	balAcu1;capHir1	1
KHDC3L	0.100548	0.831959		7	23	3	perManBai1;mm10;nanGal1	1	camFer1	3
PRTFDC1	0.100728	0.831959		10	35	2	hetGla2;myoDav1	4	cavPor3;bosTau8;bisBis1;triMan1	2
DNHD1	0.100768	0.831959		10	35	2	hetGla2;myoDav1	3	otoGar3;vicPac2;canFam3	2
TRIM21	0.101282	0.831959		10	32	0	NA	0	NA	0
REXO1	0.101409	0.831959		10	27	1	hetGla2	3	panTro4;panPan1;octDeg1	1
IQUB	0.101454	0.831959		9	30	0	NA	0	NA	0
CMTM1	0.101468	0.831959		8	32	1	hetGla2	1	octDeg1	1
CLNK	0.10183	0.831959		8	29	0	NA	1	otoGar3	0
EME2	0.101983	0.831959		8	26	2	nanGal1;hetGla2	4	turTru2;orcOrc1;balAcu1;loxAfr3	2
FBXO48	0.102136	0.831959		9	37	0	NA	0	NA	0
SPRR2B	0.102245	0.831959		9	24	0	NA	1	pteVam1	0
AGBL3	0.102247	0.831959		8	32	1	nanGal1	2	orcOrc1;balAcu1	1
CNST	0.102348	0.831959		6	32	1	nanGal1	0	NA	1
GP5	0.102447	0.831959		9	24	1	hetGla2	3	cavPor3;octDeg1;ochPri3	1
ANTXRL	0.10287	0.831959		6	24	1	nanGal1	3	ponAbe2;canFam3;musFur1	1
RP11_463D19.2	0.102883	0.831959		10	32	0	NA	0	NA	0
RAX2	0.103357	0.831959		8	28	1	hetGla2	4	rn6;cavPor3;octDeg1;ochPri3	1
SLC35E2B	0.103585	0.831959		6	35	0	NA	0	NA	0
ZG16B	0.104244	0.831959		8	33	0	NA	2	turTru2;orcOrc1	0
BSND	0.104278	0.831959		9	32	0	NA	0	NA	0
SERINC4	0.104349	0.831959		10	37	3	nanGal1;conCri1;chrAsi1	4	cavPor3;octDeg1;balAcu1;triMan1	3
SPRR1A	0.10436	0.831959		10	35	2	conCri1;chrAsi1	2	octDeg1;musFur1	2
CHRNA6	0.10447	0.831959		9	38	1	hetGla2	0	NA	1
SLC25A15	0.104752	0.831959		8	31	0	NA	1	tarSyr2	0
C1orf101	0.104793	0.831959		6	29	0	NA	0	NA	0
SATL1	0.105311	0.831959		8	25	4	hetGla2;eptFus1;myoLuc2;chrAsi1	4	calJac3;cavPor3;orcOrc1;bosTau8	3
LMNTD2	0.105357	0.831959		7	28	2	nanGal1;eptFus1	4	panHod1;capHir1;equCab2;loxAfr3	2
FAM227A	0.105529	0.831959		7	30	0	NA	1	rn6	0
GPNMB	0.105676	0.831959		9	34	0	NA	0	NA	0
HORMAD2	0.105868	0.831959		10	33	1	chrAsi1	0	NA	1
MIS18A	0.106035	0.831959		6	35	0	NA	0	NA	0
ZNF597	0.106642	0.831959		10	37	5	eptFus1;myoDav1;myoLuc2;conCri1;chrAsi1	5	orcOrc1;balAcu1;bisBis1;capHir1;loxAfr3	3
NECAB1	0.106853	0.831959		10	26	0	NA	0	NA	0
FAM135B	0.108023	0.831959		8	29	0	NA	0	NA	0
NEB	0.108925	0.831959		5	22	0	NA	1	pteAle1	0
GUCA1C	0.109573	0.831959		9	36	7	perManBai1;mm10;nanGal1;hetGla2;eptFus1;myoDav1;chrAsi1	11	rn6;cavPor3;octDeg1;oryCun2;vicPac2;camFer1;orcOrc1;panHod1;capHir1;loxAfr3;triMan1	6
DEFB133	0.109833	0.831959		9	37	1	hetGla2	2	saiBol1;cavPor3	1
SETDB1	0.109916	0.831959		10	32	4	mm10;eptFus1;myoDav1;myoLuc2	2	speTri2;cerSim1	2
RWDD2B	0.10997	0.831959		10	38	0	NA	0	NA	0
ATAD5	0.110051	0.831959		7	29	2	nanGal1;hetGla2	2	cavPor3;canFam3	2
IFNK	0.110173	0.831959		10	38	1	chrAsi1	1	calJac3	1
PNPLA3	0.110222	0.831959		6	33	1	chrAsi1	1	camFer1	1
CCDC60	0.110243	0.831959		8	31	0	NA	0	NA	0
ITPR3	0.110401	0.831959		8	28	1	myoDav1	0	NA	1
IFNE	0.110418	0.831959		9	33	2	hetGla2;conCri1	3	calJac3;cavPor3;musFur1	2
KRTAP22_1	0.1111	0.831959		8	35	3	mm10;hetGla2;conCri1	6	calJac3;saiBol1;rn6;cavPor3;ochPri3;equCab2	3
SLC4A2	0.111266	0.831959		9	32	1	nanGal1	0	NA	1
TRAM1L1	0.111426	0.831959		5	27	1	myoLuc2	1	vicPac2	1
ENTHD1	0.111476	0.831959		9	30	1	nanGal1	0	NA	1
MAP3K15	0.111634	0.831959		10	27	0	NA	0	NA	0
BST2	0.111906	0.831959		8	31	1	eptFus1	1	loxAfr3	1
MNDA	0.112322	0.831959		5	29	4	micOch1;perManBai1;nanGal1;conCri1	10	calJac3;otoGar3;balAcu1;panHod1;capHir1;cerSim1;odoRosDiv1;lepWed1;loxAfr3;triMan1	3
CARS2	0.11267	0.831959		9	25	0	NA	0	NA	0
PML	0.113212	0.831959		10	34	0	NA	0	NA	0
DGCR6L	0.113528	0.831959		9	32	1	chrAsi1	0	NA	1
ARHGAP9	0.11452	0.831959		9	34	0	NA	0	NA	0
LRRIQ4	0.114534	0.831959		9	33	1	myoDav1	0	NA	1
KRBA1	0.114941	0.831959		9	35	1	chrAsi1	3	orcOrc1;loxAfr3;triMan1	1
PDCD1LG2	0.114972	0.831959		10	36	2	hetGla2;conCri1	4	cavPor3;octDeg1;oryCun2;ochPri3	2
ZNF135	0.116041	0.831959		8	31	6	micOch1;perManBai1;mm10;eptFus1;myoDav1;chrAsi1	4	tarSyr2;rn6;ochPri3;capHir1	4
PTPN18	0.116152	0.831959		10	29	4	eptFus1;myoDav1;myoLuc2;chrAsi1	4	felCat8;musFur1;pteAle1;pteVam1	2
ADPRH	0.11658	0.831959		9	37	0	NA	0	NA	0
HOXD1	0.116908	0.831959		6	24	0	NA	0	NA	0
RDM1	0.11701	0.831959		5	27	3	perManBai1;mm10;nanGal1	5	oryCun2;vicPac2;turTru2;canFam3;odoRosDiv1	3
C1orf186	0.117244	0.831959		10	36	4	micOch1;perManBai1;mm10;nanGal1	2	oryCun2;ochPri3	3
ZNF645	0.117811	0.831959		10	31	10	micOch1;perManBai1;mm10;nanGal1;hetGla2;eptFus1;myoDav1;myoLuc2;conCri1;chrAsi1	18	tarSyr2;otoGar3;speTri2;cavPor3;octDeg1;oryCun2;camFer1;orcOrc1;balAcu1;bosTau8;capHir1;equCab2;cerSim1;felCat8;canFam3;musFur1;odoRosDiv1;pteAle1	7
LCE3E	0.11782	0.831959		8	29	1	conCri1	1	otoGar3	1
MCCC1	0.117964	0.831959		10	35	0	NA	0	NA	0
TCEAL7	0.117966	0.831959		9	35	1	hetGla2	2	cavPor3;octDeg1	1
SCN3A	0.118056	0.831959		9	31	1	nanGal1	0	NA	1
NUDT6	0.118279	0.831959		8	27	1	nanGal1	0	NA	1
C12orf54	0.118536	0.831959		9	32	0	NA	2	panPan1;rhiRox1	0
TIMELESS	0.11877	0.831959		9	38	1	nanGal1	2	turTru2;orcOrc1	1
ANGPTL3	0.118913	0.831959		10	31	0	NA	0	NA	0
C16orf78	0.119181	0.831959		8	36	0	NA	2	turTru2;orcOrc1	0
OCA2	0.1193	0.831959		7	25	0	NA	0	NA	0
NEIL1	0.119487	0.831959		10	35	1	perManBai1	1	calJac3	1
KIAA1551	0.119494	0.831959		10	32	4	micOch1;perManBai1;nanGal1;hetGla2	1	cavPor3	3
BTN2A1	0.119641	0.831959		8	27	8	micOch1;perManBai1;mm10;nanGal1;hetGla2;eptFus1;myoDav1;chrAsi1	6	cavPor3;oryCun2;equCab2;cerSim1;loxAfr3;triMan1	6
PEX6	0.119778	0.831959		7	29	0	NA	0	NA	0
LRRC27	0.119968	0.831959		9	30	2	nanGal1;hetGla2	5	oryCun2;ochPri3;turTru2;orcOrc1;balAcu1	2
NUBP1	0.120322	0.831959		10	33	0	NA	0	NA	0
CFC1	0.12033	0.831959		6	31	0	NA	0	NA	0
NIN	0.121182	0.831959		9	32	0	NA	0	NA	0
TREM1	0.121276	0.831959		9	36	1	hetGla2	5	turTru2;orcOrc1;balAcu1;loxAfr3;triMan1	1
DCDC1	0.12155	0.831959		10	35	2	nanGal1;hetGla2	4	calJac3;tarSyr2;cavPor3;ochPri3	2
DUS4L	0.121574	0.831959		10	36	0	NA	0	NA	0
ABCA7	0.121713	0.831959		9	27	4	perManBai1;nanGal1;hetGla2;myoDav1	10	octDeg1;vicPac2;camFer1;turTru2;orcOrc1;balAcu1;cerSim1;felCat8;odoRosDiv1;lepWed1	4
MRAP	0.121753	0.831959		7	37	1	conCri1	4	felCat8;canFam3;musFur1;lepWed1	1
ASNSD1	0.122029	0.831959		8	38	1	mm10	0	NA	1
RPL7A	0.122539	0.831959		9	32	0	NA	0	NA	0
KCNK4	0.122552	0.831959		8	27	0	NA	0	NA	0
CNOT11	0.122832	0.831959		7	24	0	NA	0	NA	0
SERPINB10	0.122898	0.831959		10	36	1	hetGla2	4	octDeg1;panHod1;bosTau8;capHir1	1
FAM205A	0.123012	0.831959		6	29	1	hetGla2	8	panPan1;calJac3;vicPac2;camFer1;orcOrc1;felCat8;canFam3;odoRosDiv1	1
HPS1	0.123105	0.831959		10	34	1	conCri1	0	NA	1
GPR31	0.123141	0.831959		7	32	1	hetGla2	2	otoGar3;oryCun2	1
ASXL3	0.123265	0.831959		6	25	0	NA	0	NA	0
ACSM1	0.123343	0.831959		7	22	0	NA	0	NA	0
IFNAR1	0.123696	0.831959		9	36	0	NA	1	felCat8	0
PIAS1	0.123808	0.831959		10	34	1	nanGal1	0	NA	1
TRIM15	0.123891	0.831959		10	30	0	NA	3	cavPor3;canFam3;lepWed1	0
BEST4	0.124153	0.831959		9	38	1	mm10	0	NA	1
ST6GALNAC1	0.124972	0.831959		6	32	1	mm10	2	orcOrc1;pteAle1	1
GIMAP8	0.12527	0.831959		8	30	1	hetGla2	2	panHod1;musFur1	1
PLEKHG2	0.125277	0.831959		8	32	1	chrAsi1	0	NA	1
MAP1LC3A	0.125331	0.831959		8	32	0	NA	1	tarSyr2	0
ZC2HC1B	0.125734	0.831959		10	36	0	NA	0	NA	0
PLA2G2C	0.125768	0.831959		9	37	2	hetGla2;conCri1	6	calJac3;saiBol1;speTri2;turTru2;felCat8;lepWed1	2
USE1	0.125802	0.831959		10	33	5	micOch1;perManBai1;mm10;nanGal1;hetGla2	4	rn6;cavPor3;octDeg1;ochPri3	4
CLIC2	0.125894	0.831959		7	32	1	perManBai1	0	NA	1
PLCXD2	0.126236	0.831959		10	35	0	NA	0	NA	0
RIMBP3B	0.126439	0.831959		9	24	0	NA	0	NA	0
PTGES3L	0.126817	0.831959		10	37	0	NA	0	NA	0
SPOCD1	0.126971	0.831959		9	33	8	micOch1;perManBai1;nanGal1;hetGla2;eptFus1;myoDav1;myoLuc2;conCri1	19	calJac3;saiBol1;octDeg1;oryCun2;ochPri3;vicPac2;camFer1;turTru2;orcOrc1;balAcu1;panHod1;capHir1;equCab2;cerSim1;felCat8;musFur1;odoRosDiv1;pteAle1;pteVam1	5
RNF17	0.12703	0.831959		8	33	0	NA	0	NA	0
ALOX15	0.127169	0.831959		8	31	2	nanGal1;hetGla2	4	vicPac2;orcOrc1;equCab2;triMan1	2
ZNF488	0.127664	0.831959		8	35	0	NA	0	NA	0
MED16	0.128385	0.831959		10	27	0	NA	0	NA	0
SDHC	0.128453	0.831959		10	36	0	NA	0	NA	0
IFNA8	0.128592	0.831959		9	33	5	perManBai1;nanGal1;eptFus1;myoDav1;myoLuc2	1	loxAfr3	3
GGNBP2	0.128892	0.831959		8	33	0	NA	0	NA	0
ADIG	0.129339	0.831959		10	37	2	nanGal1;hetGla2	1	cavPor3	2
FMO3	0.129608	0.831959		6	32	1	chrAsi1	2	tarSyr2;triMan1	1
RNF149	0.129744	0.831959		5	21	1	hetGla2	1	octDeg1	1
HNRNPLL	0.129812	0.831959		10	33	0	NA	0	NA	0
GLRX2	0.13008	0.831959		6	22	0	NA	0	NA	0
ICK	0.130432	0.831959		9	36	0	NA	0	NA	0
OAS2	0.130559	0.831959		8	34	0	NA	2	turTru2;orcOrc1	0
CBR1	0.130645	0.831959		9	33	0	NA	1	loxAfr3	0
LIME1	0.130658	0.831959		10	35	6	hetGla2;eptFus1;myoDav1;myoLuc2;conCri1;chrAsi1	20	otoGar3;speTri2;octDeg1;ochPri3;vicPac2;camFer1;turTru2;orcOrc1;balAcu1;panHod1;bosTau8;bisBis1;capHir1;equCab2;cerSim1;canFam3;musFur1;odoRosDiv1;lepWed1;triMan1	4
ALS2CR12	0.130752	0.831959		10	35	0	NA	0	NA	0
AKR1E2	0.130803	0.831959		8	29	0	NA	4	ponAbe2;camFer1;bisBis1;odoRosDiv1	0
ZNF2	0.130886	0.831959		10	38	0	NA	0	NA	0
ZFR2	0.131123	0.831959		6	26	4	mm10;eptFus1;myoDav1;myoLuc2	4	calJac3;saiBol1;ochPri3;capHir1	2
CDRT4	0.131132	0.831959		10	36	1	hetGla2	1	camFer1	1
SCLY	0.131213	0.831959		9	30	0	NA	0	NA	0
CCDC154	0.131382	0.831959		9	32	1	nanGal1	3	chlSab2;turTru2;orcOrc1	1
EML4	0.131427	0.831959		9	37	0	NA	0	NA	0
PRG2	0.131844	0.831959		6	34	1	hetGla2	6	turTru2;orcOrc1;panHod1;bosTau8;capHir1;equCab2	1
FNBP1	0.131896	0.831959		9	29	1	myoDav1	0	NA	1
NCR2	0.132013	0.831959		7	30	4	micOch1;perManBai1;mm10;eptFus1	10	rheMac3;macFas5;papAnu2;chlSab2;speTri2;rn6;balAcu1;panHod1;bosTau8;bisBis1	3
ZNF44	0.132106	0.831959		9	20	5	perManBai1;mm10;myoLuc2;conCri1;chrAsi1	5	panPan1;octDeg1;balAcu1;equCab2;odoRosDiv1	5
USP2	0.132191	0.831959		9	35	0	NA	0	NA	0
ZNHIT6	0.1322	0.831959		10	34	0	NA	0	NA	0
ATF7IP2	0.132286	0.831959		10	33	0	NA	0	NA	0
INCENP	0.132655	0.831959		10	28	0	NA	0	NA	0
IVL	0.132757	0.831959		10	26	4	eptFus1;myoDav1;myoLuc2;chrAsi1	8	panTro4;panPan1;papAnu2;rhiRox1;camFer1;turTru2;canFam3;odoRosDiv1	2
MAN1B1	0.133079	0.831959		6	22	0	NA	0	NA	0
NRIP2	0.133196	0.831959		10	34	1	hetGla2	1	octDeg1	1
REG3G	0.133323	0.831959		9	30	2	nanGal1;hetGla2	4	tarSyr2;speTri2;camFer1;orcOrc1	2
PCDHA9	0.133409	0.831959		7	21	2	eptFus1;myoLuc2	2	saiBol1;canFam3	1
MRGPRX2	0.133494	0.831959		8	36	2	hetGla2;conCri1	5	speTri2;cavPor3;orcOrc1;balAcu1;triMan1	2
NAT9	0.133554	0.831959		10	38	0	NA	0	NA	0
TSPAN1	0.133703	0.831959		10	38	1	chrAsi1	0	NA	1
NPM1	0.133842	0.831959		7	34	0	NA	2	vicPac2;balAcu1	0
KHDC1L	0.134158	0.831959		8	31	1	hetGla2	12	cavPor3;octDeg1;turTru2;orcOrc1;balAcu1;panHod1;bosTau8;bisBis1;cerSim1;felCat8;canFam3;musFur1	1
NHLRC4	0.134404	0.831959		10	34	2	conCri1;chrAsi1	4	saiBol1;otoGar3;oryCun2;ochPri3	2
KPNA5	0.135484	0.831959		8	32	1	mm10	1	ochPri3	1
RIMBP3C	0.135574	0.831959		9	26	0	NA	0	NA	0
CCDC141	0.135579	0.831959		9	27	0	NA	0	NA	0
CRISP1	0.135714	0.831959		9	35	1	hetGla2	3	cavPor3;octDeg1;pteAle1	1
FIG4	0.135975	0.831959		8	32	1	hetGla2	1	octDeg1	1
SBK2	0.136196	0.831959		7	29	0	NA	0	NA	0
ZNF683	0.136225	0.831959		10	36	0	NA	0	NA	0
PTGDR2	0.136432	0.831959		7	25	0	NA	0	NA	0
ZNF554	0.136489	0.831959		5	29	1	hetGla2	3	octDeg1;orcOrc1;loxAfr3	1
CD160	0.137204	0.831959		10	36	1	hetGla2	10	cavPor3;oryCun2;vicPac2;turTru2;orcOrc1;balAcu1;panHod1;bosTau8;bisBis1;capHir1	1
ULK2	0.137361	0.831959		10	27	1	hetGla2	1	capHir1	1
CALCOCO2	0.137726	0.831959		9	34	1	mm10	0	NA	1
C19orf18	0.138022	0.831959		5	34	0	NA	0	NA	0
FUNDC2	0.138126	0.831959		8	29	0	NA	0	NA	0
RP11_146B14.1	0.138199	0.831959		9	34	0	NA	0	NA	0
IL12RB1	0.13831	0.831959		6	31	0	NA	0	NA	0
AGMO	0.138389	0.831959		9	31	1	hetGla2	2	cavPor3;octDeg1	1
C6orf226	0.138412	0.831959		9	32	0	NA	0	NA	0
SMIM22	0.138465	0.831959		10	38	0	NA	0	NA	0
TOMM20L	0.13873	0.831959		9	26	2	nanGal1;hetGla2	4	calJac3;octDeg1;turTru2;orcOrc1	2
GLB1	0.138816	0.831959		10	33	0	NA	0	NA	0
DDO	0.139024	0.831959		10	35	0	NA	0	NA	0
ICA1L	0.139472	0.831959		6	32	0	NA	0	NA	0
C1orf168	0.139625	0.831959		9	32	1	nanGal1	0	NA	1
DCTPP1	0.139627	0.831959		10	37	0	NA	0	NA	0
IQCC	0.139874	0.831959		10	37	1	hetGla2	2	papAnu2;tarSyr2	1
RAD23B	0.140134	0.831959		10	32	0	NA	0	NA	0
KIAA1731NL	0.140246	0.831959		7	35	3	perManBai1;hetGla2;chrAsi1	7	calJac3;cavPor3;ochPri3;orcOrc1;balAcu1;odoRosDiv1;lepWed1	3
NXF3	0.140545	0.831959		7	24	1	myoDav1	4	panHod1;felCat8;canFam3;odoRosDiv1	1
DHX9	0.140983	0.831959		10	37	1	nanGal1	0	NA	1
KLK12	0.141085	0.831959		8	33	1	hetGla2	1	triMan1	1
ASCL4	0.141108	0.831959		8	30	1	hetGla2	0	NA	1
TMEM63A	0.142071	0.831959		8	33	0	NA	0	NA	0
ASB17	0.14249	0.831959		9	38	1	nanGal1	0	NA	1
ADM	0.14252	0.831959		10	36	0	NA	0	NA	0
MARCKSL1	0.142604	0.831959		9	35	0	NA	1	panPan1	0
SSTR4	0.142794	0.831959		10	28	5	hetGla2;eptFus1;myoDav1;myoLuc2;chrAsi1	11	cavPor3;vicPac2;turTru2;orcOrc1;panHod1;bosTau8;bisBis1;capHir1;equCab2;canFam3;pteAle1	3
CRNN	0.143086	0.831959		9	32	9	micOch1;perManBai1;mm10;nanGal1;hetGla2;eptFus1;myoDav1;myoLuc2;chrAsi1	17	panTro4;chlSab2;rhiRox1;otoGar3;rn6;octDeg1;oryCun2;camFer1;orcOrc1;balAcu1;panHod1;bosTau8;equCab2;felCat8;canFam3;musFur1;odoRosDiv1	6
LRRC43	0.143087	0.831959		9	30	1	nanGal1	0	NA	1
FCAMR	0.143095	0.831959		10	38	4	eptFus1;myoLuc2;conCri1;chrAsi1	8	cavPor3;oryCun2;camFer1;turTru2;orcOrc1;balAcu1;musFur1;pteAle1	3
MROH2B	0.143174	0.831959		7	33	0	NA	2	turTru2;orcOrc1	0
C15orf27	0.143658	0.831959		9	29	0	NA	0	NA	0
MAVS	0.143723	0.831959		10	35	2	myoDav1;chrAsi1	0	NA	2
SCN7A	0.143754	0.831959		8	27	0	NA	0	NA	0
ZNF446	0.143998	0.831959		5	27	0	NA	0	NA	0
APBB2	0.144482	0.831959		10	32	0	NA	0	NA	0
CDK5RAP2	0.144812	0.831959		9	32	3	eptFus1;myoDav1;myoLuc2	1	pteAle1	1
WDR86	0.144925	0.831959		10	29	1	conCri1	1	bisBis1	1
BOD1	0.145071	0.831959		8	23	0	NA	0	NA	0
CEP192	0.145101	0.831959		8	33	1	myoLuc2	0	NA	1
OVOL3	0.145839	0.831959		10	37	2	myoDav1;myoLuc2	2	turTru2;orcOrc1	1
AC007906.1	0.14627	0.831959		10	38	0	NA	0	NA	0
FAM160A1	0.146637	0.831959		10	33	1	myoLuc2	1	panPan1	1
DSC2	0.146889	0.831959		9	33	0	NA	0	NA	0
RIBC1	0.147081	0.831959		10	34	0	NA	0	NA	0
CKAP2L	0.14734	0.831959		10	35	0	NA	0	NA	0
ZNF714	0.14752	0.831959		8	24	3	mm10;hetGla2;myoDav1	8	panPan1;macFas5;papAnu2;chlSab2;calJac3;orcOrc1;felCat8;pteAle1	3
STAP2	0.147524	0.831959		8	29	0	NA	0	NA	0
GPX5	0.147767	0.831959		8	34	1	hetGla2	0	NA	1
UGT1A6	0.14781	0.831959		9	30	1	chrAsi1	2	felCat8;odoRosDiv1	1
KIAA1257	0.14807	0.831959		9	31	0	NA	1	odoRosDiv1	0
RRP8	0.14843	0.831959		10	37	0	NA	0	NA	0
RAD52	0.14846	0.831959		10	35	0	NA	3	turTru2;orcOrc1;balAcu1	0
SLC7A13	0.149033	0.831959		9	34	3	eptFus1;conCri1;chrAsi1	17	calJac3;saiBol1;vicPac2;camFer1;orcOrc1;balAcu1;panHod1;bosTau8;bisBis1;capHir1;equCab2;felCat8;canFam3;musFur1;odoRosDiv1;lepWed1;triMan1	3
DNALI1	0.149078	0.831959		10	38	0	NA	0	NA	0
PPEF2	0.149112	0.831959		9	33	2	nanGal1;conCri1	1	cavPor3	2
C16orf95	0.149129	0.831959		8	25	1	eptFus1	2	saiBol1;cavPor3	1
S100A12	0.149628	0.831959		10	37	4	micOch1;perManBai1;mm10;hetGla2	4	otoGar3;rn6;cavPor3;octDeg1	3
RNF183	0.149821	0.831959		10	36	2	myoDav1;myoLuc2	0	NA	1
FNTA	0.149829	0.831959		7	32	0	NA	0	NA	0
HSPB9	0.150389	0.831959		10	36	2	conCri1;chrAsi1	3	ponAbe2;rheMac3;rhiRox1	2
ZSCAN16	0.150554	0.831959		7	34	4	micOch1;perManBai1;nanGal1;hetGla2	2	cavPor3;pteAle1	3
CTD_3088G3.8	0.15104	0.831959		10	25	8	micOch1;mm10;nanGal1;eptFus1;myoDav1;myoLuc2;conCri1;chrAsi1	10	calJac3;otoGar3;speTri2;rn6;cavPor3;octDeg1;ochPri3;camFer1;pteAle1;triMan1	6
SMPD2	0.151295	0.831959		10	38	0	NA	0	NA	0
CD7	0.151348	0.831959		8	34	0	NA	2	saiBol1;otoGar3	0
CCDC94	0.151434	0.831959		7	27	1	eptFus1	2	pteAle1;pteVam1	1
VGLL1	0.151559	0.831959		10	36	1	mm10	0	NA	1
P2RY11	0.151635	0.831959		10	34	2	mm10;nanGal1	2	otoGar3;rn6	2
COL15A1	0.151755	0.831959		9	30	8	micOch1;perManBai1;mm10;nanGal1;hetGla2;eptFus1;myoDav1;myoLuc2	7	panPan1;tarSyr2;speTri2;rn6;cavPor3;pteAle1;pteVam1	5
AC004381.6	0.151764	0.831959		10	34	3	perManBai1;eptFus1;myoLuc2	1	octDeg1	2
PEX13	0.151786	0.831959		9	34	0	NA	0	NA	0
KIF2B	0.151977	0.831959		8	29	1	hetGla2	2	calJac3;orcOrc1	1
ZNF19	0.152239	0.831959		7	36	4	mm10;hetGla2;conCri1;chrAsi1	6	saiBol1;rn6;octDeg1;ochPri3;camFer1;lepWed1	4
LLfos_48D6.2	0.152391	0.831959		9	20	1	conCri1	1	otoGar3	1
KCTD19	0.152422	0.831959		10	35	0	NA	0	NA	0
FAM149A	0.153047	0.831959		8	34	1	myoLuc2	0	NA	1
PLA2G3	0.153441	0.831959		8	37	0	NA	0	NA	0
COBL	0.153613	0.831959		6	33	1	hetGla2	1	vicPac2	1
ERICH6B	0.153654	0.831959		8	32	2	perManBai1;hetGla2	2	saiBol1;octDeg1	2
CNBD2	0.153757	0.831959		9	35	1	hetGla2	0	NA	1
TSGA10IP	0.154315	0.831959		9	34	0	NA	1	camFer1	0
CLUL1	0.154488	0.831959		8	34	0	NA	0	NA	0
MCEE	0.154738	0.831959		9	36	2	myoDav1;myoLuc2	0	NA	1
AP000866.2	0.154914	0.831959		9	37	6	micOch1;perManBai1;mm10;nanGal1;hetGla2;eptFus1	12	calJac3;saiBol1;tarSyr2;otoGar3;speTri2;rn6;octDeg1;oryCun2;ochPri3;equCab2;musFur1;loxAfr3	5
PLA2G2A	0.155238	0.831959		9	35	1	chrAsi1	5	turTru2;felCat8;canFam3;musFur1;odoRosDiv1	1
DVL1	0.155372	0.831959		7	26	1	myoDav1	1	saiBol1	1
SLC25A42	0.155553	0.831959		10	32	0	NA	0	NA	0
C18orf54	0.155581	0.831959		10	36	1	chrAsi1	0	NA	1
TMEM144	0.155663	0.831959		9	33	1	eptFus1	0	NA	1
ZAP70	0.156378	0.831959		8	26	1	chrAsi1	1	oryCun2	1
ANXA8L1	0.156461	0.831959		6	35	0	NA	1	rhiRox1	0
KIF18B	0.156513	0.831959		10	38	1	mm10	3	cavPor3;panHod1;capHir1	1
IGFLR1	0.15671	0.831959		10	33	2	nanGal1;hetGla2	2	octDeg1;lepWed1	2
UMAD1	0.156867	0.831959		10	36	0	NA	0	NA	0
METTL20	0.157199	0.831959		10	36	1	hetGla2	1	cavPor3	1
ADRBK2	0.157463	0.831959		8	30	0	NA	0	NA	0
C10orf128	0.158435	0.831959		9	34	1	hetGla2	1	orcOrc1	1
ETFB	0.158594	0.831959		9	32	1	eptFus1	0	NA	1
ZPBP2	0.158662	0.831959		9	35	0	NA	0	NA	0
GLI2	0.159096	0.831959		8	27	0	NA	0	NA	0
HSF4	0.159206	0.831959		10	35	1	chrAsi1	1	turTru2	1
ADAM23	0.159424	0.831959		9	32	0	NA	0	NA	0
MFSD8	0.160218	0.831959		8	36	0	NA	0	NA	0
RSPH4A	0.160287	0.831959		9	36	0	NA	0	NA	0
HYPM	0.160299	0.831959		8	30	2	hetGla2;myoLuc2	6	octDeg1;turTru2;panHod1;bosTau8;capHir1;loxAfr3	2
SUCNR1	0.160545	0.831959		9	35	0	NA	0	NA	0
WDR66	0.160607	0.831959		8	29	0	NA	0	NA	0
CSN1S1	0.16112	0.831959		9	33	4	mm10;hetGla2;myoDav1;myoLuc2	4	calJac3;saiBol1;panHod1;bosTau8	3
FGA	0.161499	0.831959		10	33	8	micOch1;perManBai1;mm10;hetGla2;eptFus1;myoDav1;myoLuc2;chrAsi1	7	calJac3;speTri2;octDeg1;oryCun2;camFer1;equCab2;triMan1	5
ARL15	0.161551	0.831959		8	32	0	NA	0	NA	0
CD86	0.161675	0.831959		10	35	0	NA	0	NA	0
GNPTAB	0.161911	0.831959		8	34	0	NA	0	NA	0
ZNF599	0.161976	0.831959		8	33	3	micOch1;perManBai1;hetGla2	6	panPan1;rn6;cavPor3;octDeg1;pteAle1;pteVam1	2
GCKR	0.162164	0.831959		9	34	6	nanGal1;eptFus1;myoDav1;myoLuc2;conCri1;chrAsi1	17	rhiRox1;tarSyr2;ochPri3;vicPac2;camFer1;orcOrc1;balAcu1;panHod1;bosTau8;bisBis1;capHir1;felCat8;musFur1;odoRosDiv1;pteAle1;pteVam1;triMan1	4
CFAP44	0.162244	0.831959		9	30	0	NA	0	NA	0
KLRG1	0.162254	0.831959		9	35	3	eptFus1;myoDav1;myoLuc2	1	orcOrc1	1
APOF	0.162356	0.831959		10	38	0	NA	0	NA	0
CTC_487M23.8	0.162972	0.831959		9	38	0	NA	0	NA	0
PTCRA	0.163207	0.831959		8	29	1	myoDav1	0	NA	1
DQX1	0.163518	0.831959		9	36	0	NA	0	NA	0
ZBTB6	0.16354	0.831959		10	38	0	NA	0	NA	0
LRRC18	0.16354	0.831959		10	38	0	NA	0	NA	0
RAP1GAP	0.164094	0.831959		7	29	1	myoDav1	0	NA	1
FAM71B	0.164145	0.831959		8	36	0	NA	2	loxAfr3;triMan1	0
MOGAT1	0.164181	0.831959		9	36	1	hetGla2	2	ponAbe2;loxAfr3	1
APOA2	0.164761	0.831959		10	38	1	eptFus1	0	NA	1
DEFB106B	0.165488	0.831959		7	34	2	myoDav1;myoLuc2	1	cerSim1	1
ZHX1_C8orf76	0.165633	0.831959		10	33	0	NA	0	NA	0
TOP1MT	0.165954	0.831959		6	37	3	hetGla2;eptFus1;myoDav1	20	calJac3;saiBol1;speTri2;ochPri3;vicPac2;camFer1;turTru2;orcOrc1;bosTau8;bisBis1;capHir1;felCat8;canFam3;musFur1;odoRosDiv1;lepWed1;pteAle1;pteVam1;loxAfr3;triMan1	2
RIT2	0.166082	0.831959		9	32	1	nanGal1	1	balAcu1	1
CTD_2370N5.3	0.166647	0.831959		10	38	0	NA	0	NA	0
MOV10	0.166905	0.831959		8	34	0	NA	0	NA	0
XRCC3	0.166973	0.831959		7	33	0	NA	0	NA	0
NSUN5	0.167154	0.831959		8	20	0	NA	0	NA	0
NFKBIB	0.167219	0.831959		10	37	0	NA	0	NA	0
DEFB106A	0.167279	0.831959		7	34	2	myoDav1;myoLuc2	1	cerSim1	1
C6orf163	0.167306	0.831959		10	37	0	NA	0	NA	0
LRRC72	0.167324	0.831959		10	35	3	nanGal1;hetGla2;myoDav1	0	NA	3
KRTAP11_1	0.167421	0.831959		8	36	1	myoDav1	0	NA	1
TEX11	0.167628	0.831959		5	27	2	hetGla2;chrAsi1	2	cavPor3;loxAfr3	2
MGMT	0.167703	0.831959		9	30	0	NA	0	NA	0
TCEAL4	0.167895	0.831959		8	31	2	perManBai1;nanGal1	2	rn6;octDeg1	2
CGREF1	0.168508	0.831959		10	34	0	NA	0	NA	0
FSD2	0.168529	0.831959		7	36	0	NA	0	NA	0
ATAD2	0.16876	0.831959		10	32	0	NA	0	NA	0
NCR3	0.168862	0.831959		10	34	1	chrAsi1	3	speTri2;vicPac2;camFer1	1
NIPSNAP3B	0.16887	0.831959		8	31	1	nanGal1	2	calJac3;saiBol1	1
SMCO1	0.168953	0.831959		10	37	0	NA	0	NA	0
GPR64	0.169028	0.831959		9	31	0	NA	0	NA	0
SH2D7	0.169232	0.831959		7	36	1	eptFus1	1	oryCun2	1
NOXO1	0.169291	0.831959		9	33	1	chrAsi1	1	loxAfr3	1
TM4SF5	0.169871	0.831959		9	35	1	nanGal1	1	pteAle1	1
NCR1	0.170069	0.831959		6	27	0	NA	0	NA	0
CD320	0.1701	0.831959		7	34	0	NA	0	NA	0
C3orf67	0.170972	0.831959		10	34	0	NA	0	NA	0
BEND2	0.171172	0.831959		7	20	3	mm10;nanGal1;hetGla2	6	otoGar3;speTri2;cavPor3;octDeg1;vicPac2;bosTau8	3
CD80	0.17128	0.831959		8	37	0	NA	0	NA	0
TAS2R7	0.171485	0.831959		8	32	1	chrAsi1	2	tarSyr2;balAcu1	1
FADS3	0.172142	0.831959		8	32	0	NA	0	NA	0
TRIM16	0.172261	0.831959		10	33	0	NA	0	NA	0
RNF212	0.172305	0.831959		7	34	1	mm10	1	odoRosDiv1	1
EPG5	0.172585	0.831959		8	32	1	myoLuc2	0	NA	1
UQCRB	0.172778	0.831959		10	35	2	micOch1;mm10	1	rn6	2
TWF2	0.172939	0.831959		10	36	1	myoDav1	0	NA	1
SMAD9	0.173035	0.831959		8	33	1	myoLuc2	0	NA	1
ZNF223	0.173293	0.831959		5	24	3	perManBai1;mm10;nanGal1	4	oryCun2;bosTau8;felCat8;triMan1	3
ZNF318	0.173401	0.831959		9	36	0	NA	0	NA	0
ENAM	0.173471	0.831959		10	37	1	conCri1	2	saiBol1;balAcu1	1
SUSD1	0.173523	0.831959		9	28	1	eptFus1	0	NA	1
HEATR4	0.173669	0.831959		10	33	1	nanGal1	0	NA	1
ADAM12	0.173669	0.831959		8	31	1	myoDav1	0	NA	1
NOS1	0.173755	0.831959		9	27	1	myoLuc2	0	NA	1
DIRAS3	0.174228	0.831959		5	27	1	conCri1	1	cavPor3	1
PPP4C	0.174415	0.831959		10	37	0	NA	0	NA	0
TMEM106A	0.174625	0.831959		9	38	1	hetGla2	2	tarSyr2;cavPor3	1
IQCF1	0.174873	0.831959		9	35	2	nanGal1;hetGla2	2	calJac3;capHir1	2
NXPE2	0.175057	0.831959		9	31	4	eptFus1;myoDav1;myoLuc2;conCri1	8	orcOrc1;balAcu1;felCat8;canFam3;musFur1;lepWed1;pteAle1;triMan1	2
AKNA	0.17511	0.831959		9	30	0	NA	2	panTro4;speTri2	0
BANK1	0.175558	0.831959		8	30	0	NA	0	NA	0
DFFB	0.175654	0.831959		9	33	0	NA	0	NA	0
ATG9A	0.175909	0.831959		10	37	1	eptFus1	0	NA	1
PLEKHN1	0.176014	0.831959		8	29	0	NA	1	capHir1	0
SEC16A	0.176237	0.831959		9	32	2	eptFus1;myoDav1	1	ochPri3	1
SPZ1	0.176782	0.831959		10	33	2	nanGal1;hetGla2	4	chlSab2;calJac3;oryCun2;cerSim1	2
IL37	0.177024	0.831959		9	28	4	micOch1;perManBai1;mm10;conCri1	4	panTro4;panPan1;ponAbe2;cerSim1	3
RGS22	0.177135	0.831959		8	31	0	NA	0	NA	0
NEK9	0.177758	0.831959		9	33	0	NA	0	NA	0
MAATS1	0.177843	0.831959		8	32	0	NA	0	NA	0
TEFM	0.178091	0.831959		9	34	1	myoLuc2	0	NA	1
CCHCR1	0.178468	0.831959		9	31	1	myoDav1	0	NA	1
RBP7	0.178652	0.831959		8	33	3	nanGal1;hetGla2;conCri1	6	cavPor3;oryCun2;ochPri3;panHod1;cerSim1;triMan1	3
SLC26A3	0.178755	0.831959		10	33	0	NA	0	NA	0
ATM	0.179263	0.831959		7	27	1	myoDav1	0	NA	1
BAAT	0.179409	0.831959		8	34	2	myoLuc2;conCri1	12	camFer1;orcOrc1;balAcu1;panHod1;bosTau8;bisBis1;capHir1;musFur1;odoRosDiv1;lepWed1;pteAle1;pteVam1	2
FAM167B	0.179539	0.831959		9	37	0	NA	0	NA	0
AK7	0.179559	0.831959		9	29	0	NA	0	NA	0
TNFRSF25	0.179602	0.831959		7	29	0	NA	0	NA	0
SNIP1	0.179936	0.831959		9	35	0	NA	0	NA	0
BAZ2A	0.179944	0.831959		10	36	1	mm10	1	turTru2	1
C20orf144	0.180048	0.831959		7	26	1	myoLuc2	1	bisBis1	1
ITGA5	0.180213	0.831959		10	34	0	NA	0	NA	0
ADAM20	0.180222	0.831959		9	30	0	NA	1	orcOrc1	0
KRBOX1	0.180379	0.831959		8	31	2	mm10;chrAsi1	5	orcOrc1;balAcu1;equCab2;musFur1;lepWed1	2
IL11	0.180457	0.831959		8	31	1	myoDav1	0	NA	1
CLDND2	0.180658	0.831959		8	32	1	hetGla2	3	tarSyr2;vicPac2;musFur1	1
ASTL	0.181142	0.831959		9	34	1	conCri1	1	oryCun2	1
CFAP126	0.181252	0.831959		10	37	0	NA	0	NA	0
FGB	0.181412	0.831959		10	37	0	NA	0	NA	0
SMIM17	0.181435	0.831959		8	36	0	NA	0	NA	0
RPL28	0.181961	0.831959		8	35	0	NA	0	NA	0
C19orf45	0.181973	0.831959		7	27	0	NA	3	turTru2;orcOrc1;balAcu1	0
RARS2	0.182072	0.831959		10	36	0	NA	0	NA	0
SLC40A1	0.182121	0.831959		9	36	0	NA	0	NA	0
ABCA4	0.182232	0.831959		7	32	1	chrAsi1	1	speTri2	1
UBXN10	0.182255	0.831959		9	36	0	NA	0	NA	0
MX1	0.18226	0.831959		7	33	0	NA	2	turTru2;orcOrc1	0
TGM4	0.182538	0.831959		7	36	4	hetGla2;myoLuc2;conCri1;chrAsi1	22	calJac3;otoGar3;speTri2;oryCun2;ochPri3;vicPac2;camFer1;turTru2;balAcu1;panHod1;bosTau8;bisBis1;capHir1;cerSim1;felCat8;canFam3;musFur1;odoRosDiv1;lepWed1;pteAle1;loxAfr3;triMan1	4
FAM133A	0.182736	0.831959		9	33	2	mm10;hetGla2	2	rn6;felCat8	2
ARID4A	0.182771	0.831959		8	36	0	NA	0	NA	0
JADE1	0.183092	0.831959		8	35	0	NA	0	NA	0
DLEU1	0.183877	0.831959		8	32	8	micOch1;mm10;nanGal1;hetGla2;eptFus1;myoDav1;myoLuc2;conCri1	20	ponAbe2;tarSyr2;otoGar3;rn6;cavPor3;vicPac2;camFer1;orcOrc1;balAcu1;panHod1;bosTau8;bisBis1;capHir1;equCab2;cerSim1;felCat8;musFur1;odoRosDiv1;lepWed1;pteAle1	6
KLHDC7A	0.183942	0.831959		8	30	0	NA	0	NA	0
ZBTB14	0.184071	0.831959		8	36	0	NA	0	NA	0
THNSL2	0.184341	0.831959		9	32	1	nanGal1	0	NA	1
DLD	0.184428	0.831959		8	35	0	NA	0	NA	0
RRP1B	0.184585	0.831959		9	33	3	micOch1;mm10;nanGal1	5	ochPri3;panHod1;capHir1;musFur1;loxAfr3	3
CD44	0.184616	0.831959		8	35	2	eptFus1;myoDav1	5	tarSyr2;otoGar3;octDeg1;musFur1;pteAle1	1
KCTD18	0.184647	0.831959		10	32	1	hetGla2	1	pteAle1	1
RHEBL1	0.184933	0.831959		10	38	1	conCri1	0	NA	1
SPP1	0.184947	0.831959		10	36	1	chrAsi1	0	NA	1
LDOC1L	0.184961	0.831959		8	34	0	NA	0	NA	0
CPT1C	0.185169	0.831959		9	23	1	myoDav1	0	NA	1
AWAT2	0.185957	0.831959		10	36	3	eptFus1;myoLuc2;chrAsi1	3	pteVam1;loxAfr3;triMan1	2
LRCOL1	0.186156	0.831959		7	25	0	NA	1	bosTau8	0
MS4A14	0.186257	0.831959		6	34	3	nanGal1;conCri1;chrAsi1	4	saiBol1;tarSyr2;loxAfr3;triMan1	3
NPSR1	0.186286	0.831959		9	32	1	hetGla2	1	orcOrc1	1
C5orf45	0.186408	0.831959		9	36	1	myoDav1	2	papAnu2;ochPri3	1
CYP2C19	0.186459	0.831959		6	25	1	hetGla2	6	vicPac2;panHod1;bosTau8;bisBis1;felCat8;loxAfr3	1
GSTP1	0.186642	0.831959		9	31	0	NA	0	NA	0
SLC6A2	0.18668	0.831959		8	33	0	NA	0	NA	0
TEX13A	0.187122	0.831959		8	31	3	hetGla2;eptFus1;chrAsi1	13	rheMac3;macFas5;papAnu2;chlSab2;rhiRox1;saiBol1;tarSyr2;ochPri3;turTru2;orcOrc1;equCab2;felCat8;triMan1	3
RDH13	0.187264	0.831959		7	36	0	NA	0	NA	0
MAST1	0.187359	0.831959		8	23	0	NA	0	NA	0
DFNB59	0.187582	0.831959		9	35	1	myoLuc2	0	NA	1
ERICH5	0.187655	0.831959		9	34	3	perManBai1;hetGla2;conCri1	2	equCab2;canFam3	3
SP6	0.188021	0.831959		9	34	0	NA	0	NA	0
PCDHAC1	0.188037	0.831959		10	35	2	hetGla2;chrAsi1	5	oryCun2;capHir1;canFam3;loxAfr3;triMan1	2
TSR2	0.188086	0.831959		9	33	0	NA	0	NA	0
EXOSC3	0.188763	0.831959		9	34	1	myoLuc2	0	NA	1
CD276	0.18888	0.831959		7	23	4	micOch1;perManBai1;mm10;nanGal1	4	panPan1;chlSab2;rhiRox1;rn6	3
DGAT2L6	0.189018	0.831959		10	35	1	chrAsi1	3	orcOrc1;balAcu1;cerSim1	1
REST	0.189041	0.831959		8	27	3	eptFus1;myoDav1;myoLuc2	2	bisBis1;capHir1	1
CCDC159	0.189233	0.831959		10	37	0	NA	1	orcOrc1	0
LBR	0.189392	0.831959		9	32	0	NA	0	NA	0
TNNI3	0.189408	0.831959		7	35	0	NA	0	NA	0
ANKRD6	0.189538	0.831959		8	35	0	NA	0	NA	0
PRDM11	0.18992	0.831959		9	33	0	NA	0	NA	0
C1orf94	0.189973	0.831959		10	31	0	NA	0	NA	0
MGEA5	0.190105	0.831959		10	29	0	NA	0	NA	0
C2orf43	0.190439	0.831959		9	34	0	NA	0	NA	0
BEX1	0.190748	0.831959		8	29	1	eptFus1	0	NA	1
SULT1A3	0.190803	0.831959		8	33	1	nanGal1	2	rhiRox1;tarSyr2	1
RABL6	0.190857	0.831959		8	31	1	myoDav1	0	NA	1
TMEM184C	0.191022	0.831959		9	33	1	myoLuc2	0	NA	1
FAM185A	0.191169	0.831959		8	27	0	NA	0	NA	0
SLX1A_SULT1A3	0.19124	0.831959		8	33	1	nanGal1	2	rhiRox1;tarSyr2	1
C10orf67	0.191275	0.831959		9	34	0	NA	0	NA	0
SORL1	0.191396	0.831959		9	27	0	NA	0	NA	0
LRRK2	0.191426	0.831959		6	27	0	NA	0	NA	0
SLC5A9	0.191428	0.831959		10	38	1	nanGal1	0	NA	1
TNFRSF14	0.191708	0.831959		5	29	1	hetGla2	7	vicPac2;camFer1;turTru2;orcOrc1;panHod1;bosTau8;bisBis1	1
AFM	0.191909	0.831959		7	34	2	hetGla2;conCri1	2	loxAfr3;triMan1	2
GFRAL	0.191925	0.831959		10	35	0	NA	0	NA	0
CNTN1	0.192188	0.831959		8	33	0	NA	0	NA	0
IL36B	0.192299	0.831959		5	20	0	NA	2	panTro4;panPan1	0
ANO5	0.192397	0.831959		8	31	0	NA	0	NA	0
TRIM40	0.192592	0.831959		7	33	1	hetGla2	3	cavPor3;turTru2;musFur1	1
CREG2	0.192722	0.831959		9	20	1	myoDav1	1	rhiRox1	1
TSNARE1	0.192964	0.831959		6	29	5	micOch1;perManBai1;mm10;nanGal1;hetGla2	7	calJac3;rn6;cavPor3;octDeg1;camFer1;musFur1;pteAle1	4
STPG2	0.193003	0.831959		7	32	1	hetGla2	3	orcOrc1;equCab2;lepWed1	1
GCH1	0.193047	0.831959		9	28	1	myoDav1	0	NA	1
NFKBID	0.193288	0.831959		10	36	0	NA	0	NA	0
ZNF304	0.193473	0.831959		9	36	3	mm10;nanGal1;hetGla2	4	speTri2;rn6;cavPor3;balAcu1	3
GTPBP3	0.193529	0.831959		9	33	0	NA	0	NA	0
GNAI2	0.193849	0.831959		9	37	0	NA	0	NA	0
PITPNM2	0.193912	0.831959		7	32	1	chrAsi1	1	vicPac2	1
UTS2B	0.194143	0.831959		9	37	1	conCri1	3	calJac3;saiBol1;pteAle1	1
CFAP43	0.194349	0.831959		6	33	1	perManBai1	0	NA	1
SLIT2	0.194427	0.831959		9	31	0	NA	0	NA	0
PRPF19	0.194639	0.831959		9	38	0	NA	0	NA	0
N4BP2L2	0.194764	0.831959		9	32	0	NA	0	NA	0
KRTAP4_2	0.195713	0.831959		7	22	2	nanGal1;eptFus1	5	otoGar3;panHod1;bosTau8;odoRosDiv1;lepWed1	2
GALC	0.195753	0.831959		9	33	0	NA	0	NA	0
HINT3	0.195769	0.831959		7	31	0	NA	0	NA	0
BIK	0.195803	0.831959		7	37	0	NA	0	NA	0
TRIP12	0.195824	0.831959		10	34	0	NA	0	NA	0
CCL15	0.19596	0.831959		7	38	1	nanGal1	2	ochPri3;orcOrc1	1
CCL15_CCL14	0.19596	0.831959		7	38	1	nanGal1	2	ochPri3;orcOrc1	1
VIM	0.196101	0.831959		9	31	0	NA	0	NA	0
PCDHB14	0.196207	0.831959		7	20	1	eptFus1	0	NA	1
LCN10	0.196372	0.831959		6	26	0	NA	2	panTro4;panPan1	0
ITLN1	0.196465	0.831959		5	26	1	hetGla2	9	ponAbe2;vicPac2;camFer1;balAcu1;capHir1;felCat8;musFur1;odoRosDiv1;lepWed1	1
PRAMEF12	0.196551	0.831959		6	26	3	nanGal1;hetGla2;eptFus1	10	calJac3;tarSyr2;cavPor3;balAcu1;panHod1;bosTau8;bisBis1;capHir1;equCab2;canFam3	3
RPAP1	0.196845	0.831959		10	35	0	NA	0	NA	0
ERRFI1	0.196903	0.831959		9	32	0	NA	0	NA	0
CRTC3	0.197133	0.831959		9	35	0	NA	0	NA	0
ETV7	0.197291	0.831959		6	32	2	mm10;hetGla2	4	rn6;cavPor3;octDeg1;balAcu1	2
SPINK14	0.197297	0.831959		10	36	2	nanGal1;hetGla2	5	rhiRox1;turTru2;orcOrc1;balAcu1;pteAle1	2
NSFL1C	0.197326	0.831959		9	36	0	NA	0	NA	0
MFI2	0.19733	0.831959		9	37	0	NA	0	NA	0
CCDC106	0.197531	0.831959		8	31	1	myoDav1	0	NA	1
LMNB2	0.197556	0.831959		7	25	0	NA	0	NA	0
TSPAN16	0.197607	0.831959		9	35	4	micOch1;mm10;hetGla2;conCri1	13	rn6;vicPac2;camFer1;turTru2;orcOrc1;balAcu1;panHod1;felCat8;canFam3;musFur1;odoRosDiv1;lepWed1;pteAle1	4
NTRK3	0.197746	0.831959		8	30	0	NA	0	NA	0
OFD1	0.197881	0.831959		10	28	1	nanGal1	0	NA	1
SLC35G1	0.198048	0.831959		9	37	0	NA	0	NA	0
METTL4	0.19818	0.831959		10	34	1	mm10	1	turTru2	1
COQ4	0.198224	0.831959		10	37	0	NA	0	NA	0
KRTAP12_2	0.198476	0.831959		6	28	1	chrAsi1	7	rheMac3;macFas5;papAnu2;chlSab2;otoGar3;lepWed1;pteAle1	1
ERLEC1	0.198519	0.831959		9	33	0	NA	0	NA	0
CDH9	0.198565	0.831959		7	26	0	NA	0	NA	0
LCNL1	0.198658	0.831959		7	27	4	micOch1;perManBai1;mm10;eptFus1	12	rheMac3;macFas5;papAnu2;chlSab2;rhiRox1;calJac3;rn6;cavPor3;octDeg1;ochPri3;turTru2;orcOrc1	3
BRIP1	0.198838	0.831959		10	30	0	NA	0	NA	0
C2orf88	0.199079	0.831959		10	38	1	eptFus1	0	NA	1
GCG	0.199079	0.831959		10	38	0	NA	0	NA	0
GRINA	0.199249	0.831959		9	31	0	NA	0	NA	0
PRSS12	0.199293	0.831959		9	35	0	NA	1	speTri2	0
C6orf136	0.199346	0.831959		9	37	0	NA	0	NA	0
ENTHD2	0.199375	0.831959		7	29	0	NA	0	NA	0
IFI27L2	0.199379	0.831959		6	31	0	NA	0	NA	0
DSC3	0.19938	0.831959		9	34	1	myoLuc2	0	NA	1
ZP2	0.199512	0.831959		8	35	0	NA	0	NA	0
GLI4	0.199708	0.831959		7	27	1	mm10	0	NA	1
SAP25	0.199802	0.831959		10	35	0	NA	1	otoGar3	0
2010-03-01	0.199884	0.831959		10	35	1	hetGla2	1	turTru2	1
HCK	0.199933	0.831959		8	34	0	NA	0	NA	0
PNMT	0.200709	0.831959		9	30	0	NA	0	NA	0
PMVK	0.200791	0.831959		9	36	0	NA	0	NA	0
APEH	0.200792	0.831959		9	36	0	NA	0	NA	0
C1orf100	0.201098	0.831959		9	36	1	nanGal1	0	NA	1
OCRL	0.201238	0.831959		9	33	0	NA	0	NA	0
CA9	0.201288	0.831959		10	37	0	NA	0	NA	0
BEND7	0.201311	0.831959		7	29	0	NA	0	NA	0
COLCA2	0.20152	0.831959		8	35	0	NA	0	NA	0
MINOS1_NBL1	0.201645	0.831959		10	33	0	NA	0	NA	0
SLC30A7	0.201661	0.831959		10	36	0	NA	0	NA	0
SLC22A13	0.201698	0.831959		9	32	1	hetGla2	9	rhiRox1;turTru2;orcOrc1;balAcu1;panHod1;bosTau8;bisBis1;capHir1;triMan1	1
TAS1R1	0.201735	0.831959		9	37	3	eptFus1;myoLuc2;conCri1	5	turTru2;orcOrc1;balAcu1;odoRosDiv1;pteAle1	2
NBL1	0.201759	0.831959		10	33	0	NA	0	NA	0
FOXD4L1	0.201843	0.831959		8	26	1	chrAsi1	0	NA	1
ABCB7	0.201889	0.831959		9	30	0	NA	0	NA	0
IFITM10	0.202042	0.831959		8	23	0	NA	0	NA	0
HIBCH	0.20219	0.831959		9	32	0	NA	0	NA	0
SLC39A12	0.202256	0.831959		10	30	1	conCri1	0	NA	1
CCDC121	0.202289	0.831959		10	36	5	perManBai1;hetGla2;eptFus1;myoDav1;myoLuc2	4	rn6;cavPor3;octDeg1;bosTau8	3
NUDT8	0.202421	0.831959		7	27	0	NA	0	NA	0
KLF5	0.202424	0.831959		10	37	0	NA	0	NA	0
TRIM47	0.202494	0.831959		7	22	1	myoDav1	3	balAcu1;panHod1;capHir1	1
MIIP	0.202564	0.831959		9	34	0	NA	0	NA	0
C1orf141	0.202647	0.831959		10	34	0	NA	3	vicPac2;turTru2;orcOrc1	0
POP4	0.202659	0.831959		6	35	1	perManBai1	0	NA	1
STAT2	0.202853	0.831959		10	32	0	NA	0	NA	0
ZNF420	0.202862	0.831959		7	32	0	NA	0	NA	0
AHR	0.202863	0.831959		10	31	0	NA	0	NA	0
HOXB13	0.20303	0.831959		9	35	0	NA	0	NA	0
KIAA1279	0.203036	0.831959		9	34	0	NA	0	NA	0
APOL2	0.203166	0.831959		7	23	2	hetGla2;chrAsi1	2	papAnu2;calJac3	2
KRT6A	0.203168	0.831959		5	22	1	nanGal1	0	NA	1
TTC39C	0.203202	0.831959		9	34	1	myoDav1	0	NA	1
HOXB6	0.203484	0.831959		9	30	0	NA	0	NA	0
N4BP1	0.203602	0.831959		9	35	0	NA	0	NA	0
SLC38A3	0.203602	0.831959		9	35	0	NA	0	NA	0
SUSD3	0.203682	0.831959		9	35	0	NA	0	NA	0
RPL36A_HNRNPH2	0.203719	0.831959		10	38	0	NA	1	bisBis1	0
CNGB1	0.203988	0.831959		8	32	1	myoDav1	0	NA	1
FOXJ2	0.204125	0.831959		9	30	0	NA	0	NA	0
SLC34A3	0.204355	0.831959		7	20	1	myoDav1	1	ochPri3	1
EGR1	0.204365	0.831959		10	36	0	NA	0	NA	0
ACTL8	0.204406	0.831959		8	34	2	micOch1;mm10	1	rn6	2
FAP	0.204517	0.831959		9	33	0	NA	0	NA	0
BMP2	0.204733	0.831959		9	29	0	NA	0	NA	0
C10orf11	0.20482	0.831959		9	29	0	NA	0	NA	0
ZIM2	0.204861	0.831959		9	34	4	perManBai1;mm10;hetGla2;chrAsi1	3	rn6;cavPor3;capHir1	4
CAP1	0.205098	0.831959		9	34	1	nanGal1	0	NA	1
TLDC2	0.205123	0.831959		10	34	0	NA	0	NA	0
LPIN2	0.205156	0.831959		10	34	1	hetGla2	1	turTru2	1
TMC4	0.205348	0.831959		9	29	1	myoLuc2	0	NA	1
ETFA	0.205462	0.831959		8	35	0	NA	0	NA	0
GAS2L2	0.205694	0.831959		9	29	0	NA	0	NA	0
ZRANB2	0.205779	0.831959		9	36	0	NA	0	NA	0
VRK3	0.205874	0.831959		10	36	1	chrAsi1	0	NA	1
ZWINT	0.20593	0.831959		9	31	0	NA	0	NA	0
SIT1	0.206095	0.831959		10	38	0	NA	0	NA	0
SLFNL1	0.206158	0.831959		10	35	0	NA	0	NA	0
TMBIM4	0.206325	0.831959		9	35	0	NA	0	NA	0
TBRG4	0.206497	0.831959		9	34	0	NA	0	NA	0
TMOD2	0.206499	0.831959		10	34	0	NA	0	NA	0
MLNR	0.206793	0.831959		7	25	5	micOch1;perManBai1;mm10;nanGal1;hetGla2	1	orcOrc1	4
CD6	0.20682	0.831959		8	28	0	NA	0	NA	0
PTGES	0.20684	0.831959		9	34	0	NA	0	NA	0
HIST2H3D	0.207029	0.831959		9	34	1	myoDav1	0	NA	1
PAPOLB	0.207082	0.831959		10	31	0	NA	0	NA	0
PDK1	0.207152	0.831959		8	35	0	NA	0	NA	0
CLASRP	0.207184	0.831959		8	27	0	NA	0	NA	0
TLR7	0.207213	0.831959		10	35	0	NA	0	NA	0
AMER1	0.207238	0.831959		10	36	0	NA	0	NA	0
NEMF	0.207386	0.831959		9	31	1	nanGal1	0	NA	1
RPS2	0.207644	0.831959		10	34	0	NA	0	NA	0
DPY19L3	0.207808	0.831959		10	35	0	NA	0	NA	0
SPDYC	0.207923	0.831959		7	32	4	perManBai1;mm10;hetGla2;conCri1	6	speTri2;rn6;cavPor3;octDeg1;ochPri3;capHir1	4
FOXL2NB	0.207971	0.831959		10	35	8	micOch1;perManBai1;mm10;nanGal1;hetGla2;eptFus1;conCri1;chrAsi1	18	rheMac3;macFas5;papAnu2;chlSab2;calJac3;otoGar3;rn6;cavPor3;octDeg1;orcOrc1;bosTau8;felCat8;canFam3;odoRosDiv1;lepWed1;pteAle1;pteVam1;loxAfr3	7
CORT	0.208163	0.831959		9	37	1	conCri1	3	turTru2;orcOrc1;felCat8	1
FSCB	0.20861	0.831959		6	23	3	nanGal1;hetGla2;eptFus1	9	panTro4;panPan1;rheMac3;macFas5;calJac3;cavPor3;vicPac2;orcOrc1;balAcu1	3
SECISBP2	0.208988	0.831959		8	31	0	NA	0	NA	0
GREB1	0.209234	0.831959		8	24	0	NA	0	NA	0
ADCY8	0.209276	0.831959		8	23	0	NA	0	NA	0
SULT1A2	0.20944	0.831959		8	36	1	nanGal1	1	tarSyr2	1
TPH1	0.209471	0.831959		10	34	0	NA	0	NA	0
TCL1B	0.209726	0.831959		5	34	2	hetGla2;chrAsi1	5	cavPor3;octDeg1;oryCun2;pteAle1;pteVam1	2
ZNF266	0.209792	0.831959		6	28	4	perManBai1;mm10;myoDav1;myoLuc2	7	cavPor3;octDeg1;camFer1;turTru2;orcOrc1;bosTau8;bisBis1	3
CASC5	0.209861	0.831959		8	32	4	perManBai1;eptFus1;myoLuc2;chrAsi1	1	triMan1	3
BCAS3	0.210305	0.831959		9	28	0	NA	0	NA	0
PER3	0.210601	0.831959		8	35	3	nanGal1;hetGla2;conCri1	10	rheMac3;octDeg1;oryCun2;ochPri3;vicPac2;camFer1;panHod1;bosTau8;bisBis1;musFur1	3
BPIFB2	0.210847	0.831959		10	33	1	conCri1	2	turTru2;orcOrc1	1
ZNF354C	0.210994	0.831959		7	36	1	conCri1	1	octDeg1	1
RAN	0.211156	0.831959		9	29	0	NA	0	NA	0
MTFMT	0.211259	0.831959		8	36	0	NA	0	NA	0
TTLL2	0.211416	0.831959		6	28	3	micOch1;nanGal1;hetGla2	8	speTri2;cavPor3;octDeg1;equCab2;cerSim1;felCat8;musFur1;triMan1	3
KSR1	0.211566	0.831959		10	33	9	micOch1;perManBai1;mm10;nanGal1;eptFus1;myoDav1;myoLuc2;conCri1;chrAsi1	21	calJac3;saiBol1;tarSyr2;otoGar3;speTri2;octDeg1;ochPri3;vicPac2;camFer1;balAcu1;bosTau8;bisBis1;equCab2;cerSim1;felCat8;canFam3;musFur1;odoRosDiv1;pteAle1;loxAfr3;triMan1	6
NAP1L2	0.211647	0.831959		7	27	1	conCri1	2	panHod1;capHir1	1
TAS2R9	0.211788	0.831959		5	30	2	nanGal1;hetGla2	8	panPan1;tarSyr2;otoGar3;octDeg1;panHod1;bosTau8;bisBis1;capHir1	2
CNOT3	0.211847	0.831959		7	30	1	conCri1	2	turTru2;orcOrc1	1
AQP10	0.212229	0.831959		6	37	3	micOch1;perManBai1;mm10	10	vicPac2;camFer1;turTru2;orcOrc1;balAcu1;bosTau8;bisBis1;cerSim1;lepWed1;triMan1	2
SCAND1	0.212231	0.831959		10	35	1	eptFus1	0	NA	1
GPR180	0.212315	0.831959		9	37	0	NA	0	NA	0
NLGN1	0.212479	0.831959		9	32	0	NA	0	NA	0
DOCK4	0.212502	0.831959		8	29	0	NA	0	NA	0
KIF27	0.212536	0.831959		8	30	1	nanGal1	2	panPan1;cavPor3	1
SLC17A7	0.212589	0.831959		9	33	0	NA	0	NA	0
RAD17	0.212711	0.831959		7	31	1	hetGla2	0	NA	1
HSPB6	0.212749	0.831959		9	32	0	NA	0	NA	0
C6orf15	0.212875	0.831959		7	37	2	eptFus1;myoDav1	1	canFam3	1
SESN1	0.212906	0.831959		9	34	1	eptFus1	0	NA	1
FBXO44	0.21306	0.831959		10	33	0	NA	0	NA	0
ACER2	0.213516	0.831959		10	33	1	eptFus1	0	NA	1
C6orf141	0.213823	0.831959		8	27	1	myoDav1	0	NA	1
C2orf73	0.214057	0.831959		10	35	0	NA	0	NA	0
AC092835.2	0.214127	0.831959		9	36	1	mm10	0	NA	1
RP11_766F14.2	0.214863	0.831959		8	30	0	NA	0	NA	0
LIPK	0.214919	0.831959		9	37	0	NA	0	NA	0
HERC6	0.214993	0.831959		5	27	1	nanGal1	2	orcOrc1;balAcu1	1
CLPSL1	0.215302	0.831959		8	33	5	perManBai1;mm10;nanGal1;hetGla2;conCri1	11	cavPor3;ochPri3;orcOrc1;panHod1;felCat8;canFam3;musFur1;odoRosDiv1;lepWed1;pteAle1;pteVam1	5
KRTAP20_3	0.215341	0.831959		8	36	3	nanGal1;eptFus1;chrAsi1	10	rheMac3;macFas5;calJac3;octDeg1;balAcu1;panHod1;bisBis1;capHir1;pteAle1;pteVam1	3
RASSF7	0.215584	0.831959		9	31	0	NA	0	NA	0
PVRL2	0.215669	0.831959		9	31	0	NA	0	NA	0
NUP62CL	0.215783	0.831959		9	35	1	myoLuc2	0	NA	1
MCCC2	0.215804	0.831959		9	35	0	NA	0	NA	0
IL31	0.215927	0.831959		9	38	0	NA	1	balAcu1	0
CCER1	0.215931	0.831959		9	32	0	NA	0	NA	0
NME2	0.216067	0.831959		9	29	1	conCri1	4	bisBis1;canFam3;odoRosDiv1;lepWed1	1
ZNF239	0.217233	0.831959		8	36	2	perManBai1;mm10	1	rn6	2
NDUFB3	0.217407	0.831959		9	36	0	NA	0	NA	0
ATP6V1G2_DDX39B	0.217413	0.831959		8	37	0	NA	0	NA	0
NOL3	0.217697	0.831959		10	33	0	NA	0	NA	0
UNC119	0.217773	0.831959		8	25	0	NA	0	NA	0
HEPN1	0.217955	0.831959		10	36	6	micOch1;perManBai1;nanGal1;hetGla2;myoLuc2;chrAsi1	8	otoGar3;cavPor3;octDeg1;oryCun2;cerSim1;felCat8;canFam3;musFur1	5
DEPDC4	0.218309	0.831959		10	37	8	micOch1;perManBai1;mm10;nanGal1;hetGla2;eptFus1;myoDav1;myoLuc2	19	rheMac3;macFas5;papAnu2;chlSab2;rhiRox1;calJac3;speTri2;rn6;cavPor3;octDeg1;panHod1;bosTau8;bisBis1;capHir1;felCat8;canFam3;musFur1;odoRosDiv1;lepWed1	5
TMEM243	0.218524	0.831959		9	34	0	NA	0	NA	0
FCGRT	0.218642	0.831959		9	30	0	NA	0	NA	0
OPN3	0.218657	0.831959		7	23	1	myoLuc2	6	vicPac2;camFer1;balAcu1;panHod1;bosTau8;bisBis1	1
C3orf20	0.218772	0.831959		10	31	1	hetGla2	1	turTru2	1
ENPP3	0.218778	0.831959		10	32	0	NA	0	NA	0
SLC25A41	0.218795	0.831959		9	31	0	NA	4	calJac3;turTru2;orcOrc1;odoRosDiv1	0
ZNF496	0.218843	0.831959		8	30	0	NA	0	NA	0
LTBR	0.218976	0.831959		10	32	0	NA	0	NA	0
STARD6	0.219033	0.831959		8	36	1	hetGla2	3	calJac3;balAcu1;cerSim1	1
FAM213B	0.219214	0.831959		7	22	1	eptFus1	0	NA	1
OVCH2	0.219246	0.831959		8	33	1	nanGal1	4	calJac3;saiBol1;otoGar3;orcOrc1	1
RGS10	0.219432	0.831959		8	36	0	NA	0	NA	0
USP32	0.219765	0.831959		10	34	0	NA	0	NA	0
ACSM5	0.219817	0.831959		9	32	2	myoDav1;myoLuc2	2	turTru2;orcOrc1	1
APPL1	0.21984	0.831959		9	32	1	nanGal1	0	NA	1
SIAE	0.219855	0.831959		9	35	4	micOch1;perManBai1;mm10;nanGal1	3	rn6;equCab2;cerSim1	3
FAM26F	0.220035	0.831959		8	27	1	chrAsi1	2	equCab2;cerSim1	1
FBF1	0.220071	0.831959		9	34	3	eptFus1;myoDav1;myoLuc2	0	NA	1
AKAP14	0.220104	0.831959		7	35	0	NA	0	NA	0
CENPJ	0.220289	0.831959		10	34	0	NA	0	NA	0
MTX1	0.220867	0.831959		7	28	0	NA	0	NA	0
IGFBP6	0.220887	0.831959		9	30	1	myoDav1	0	NA	1
ZFP36L1	0.221028	0.831959		9	31	0	NA	0	NA	0
ZSCAN10	0.221056	0.831959		8	32	0	NA	0	NA	0
FAM43B	0.221249	0.831959		7	20	1	conCri1	0	NA	1
EMX2	0.221393	0.831959		9	25	0	NA	0	NA	0
KLF1	0.221645	0.831959		9	31	0	NA	0	NA	0
ITLN2	0.221661	0.831959		5	25	3	perManBai1;conCri1;chrAsi1	11	ponAbe2;rheMac3;macFas5;papAnu2;chlSab2;balAcu1;capHir1;equCab2;felCat8;odoRosDiv1;triMan1	3
GFPT1	0.221865	0.831959		9	30	1	eptFus1	0	NA	1
ASB16	0.222581	0.831959		9	27	2	nanGal1;chrAsi1	2	cavPor3;octDeg1	2
INA	0.222923	0.831959		8	26	0	NA	0	NA	0
TMED7_TICAM2	0.222938	0.831959		10	35	3	perManBai1;mm10;nanGal1	1	rn6	3
SMC1B	0.223044	0.831959		9	34	1	nanGal1	0	NA	1
PRKD1	0.223308	0.831959		8	30	0	NA	0	NA	0
CYP2C18	0.223832	0.831959		5	30	2	mm10;myoLuc2	9	ponAbe2;rheMac3;macFas5;vicPac2;turTru2;orcOrc1;balAcu1;capHir1;loxAfr3	2
BCL2L15	0.22389	0.831959		10	37	0	NA	0	NA	0
TRAPPC12	0.223942	0.831959		7	28	1	myoDav1	0	NA	1
XRRA1	0.224197	0.831959		10	31	0	NA	0	NA	0
PRSS42	0.224221	0.831959		7	34	1	hetGla2	6	cavPor3;octDeg1;turTru2;orcOrc1;balAcu1;lepWed1	1
GPR137B	0.224246	0.831959		7	21	0	NA	1	musFur1	0
RNF44	0.224253	0.831959		10	30	0	NA	1	panPan1	0
TTC38	0.224491	0.831959		7	29	1	myoDav1	0	NA	1
TEX38	0.224733	0.831959		10	35	1	hetGla2	1	speTri2	1
POFUT2	0.224895	0.831959		9	32	1	myoLuc2	0	NA	1
ZNF182	0.224919	0.831959		9	36	1	perManBai1	0	NA	1
PAPPA	0.225196	0.831959		9	27	0	NA	0	NA	0
IFITM5	0.225576	0.831959		7	31	0	NA	1	ochPri3	0
TEX40	0.225659	0.831959		10	35	2	myoDav1;myoLuc2	0	NA	1
RIC8A	0.225997	0.831959		9	34	0	NA	0	NA	0
NIPSNAP1	0.226028	0.831959		9	34	1	myoDav1	0	NA	1
APOBR	0.226188	0.831959		10	25	2	hetGla2;myoLuc2	0	NA	2
NAT16	0.226512	0.831959		10	37	9	micOch1;perManBai1;mm10;nanGal1;hetGla2;eptFus1;myoDav1;myoLuc2;conCri1	24	panPan1;tarSyr2;otoGar3;speTri2;rn6;cavPor3;octDeg1;oryCun2;ochPri3;vicPac2;camFer1;turTru2;orcOrc1;balAcu1;panHod1;bosTau8;bisBis1;equCab2;cerSim1;felCat8;canFam3;musFur1;odoRosDiv1;lepWed1	6
HELQ	0.226672	0.831959		10	33	0	NA	0	NA	0
BSN	0.227376	0.831959		9	30	1	eptFus1	0	NA	1
TEX35	0.227436	0.831959		10	37	1	hetGla2	3	calJac3;saiBol1;vicPac2	1
C1orf234	0.227473	0.831959		9	36	0	NA	0	NA	0
CCDC6	0.227649	0.831959		7	24	0	NA	0	NA	0
CHAF1A	0.227855	0.831959		9	30	0	NA	0	NA	0
KCTD8	0.228101	0.831959		9	24	0	NA	0	NA	0
ART5	0.228697	0.831959		10	38	0	NA	0	NA	0
CECR1	0.228953	0.831959		5	32	2	mm10;nanGal1	4	cavPor3;octDeg1;oryCun2;ochPri3	2
GZMM	0.229021	0.831959		9	27	2	nanGal1;hetGla2	5	otoGar3;speTri2;turTru2;canFam3;lepWed1	2
C7orf43	0.229857	0.831959		9	27	0	NA	0	NA	0
TDG	0.2299	0.831959		7	37	0	NA	0	NA	0
FBXO17	0.230057	0.831959		8	26	2	micOch1;nanGal1	0	NA	2
KLRC4_KLRK1	0.230068	0.831959		8	31	0	NA	0	NA	0
KLRK1	0.230068	0.831959		8	31	0	NA	0	NA	0
SMARCAD1	0.230088	0.831959		8	37	0	NA	0	NA	0
CHIT1	0.230157	0.831959		7	31	2	micOch1;conCri1	5	chlSab2;panHod1;bosTau8;bisBis1;cerSim1	2
MCF2L2	0.230199	0.831959		8	29	2	mm10;nanGal1	1	rn6	2
TNS1	0.230232	0.831959		10	34	1	myoLuc2	0	NA	1
SH3D19	0.230457	0.831959		9	30	0	NA	1	speTri2	0
MAGEB6	0.23057	0.831959		9	24	5	nanGal1;hetGla2;eptFus1;myoDav1;chrAsi1	9	rheMac3;tarSyr2;speTri2;cavPor3;turTru2;orcOrc1;capHir1;equCab2;loxAfr3	4
NAA35	0.23059	0.831959		9	32	1	nanGal1	0	NA	1
IGSF6	0.230782	0.831959		10	36	0	NA	0	NA	0
PRC1	0.230978	0.831959		8	31	0	NA	0	NA	0
GCNT3	0.231248	0.831959		10	36	0	NA	0	NA	0
RPA3	0.23147	0.831959		9	34	0	NA	0	NA	0
NOB1	0.23156	0.831959		8	32	0	NA	0	NA	0
TUBB2B	0.231792	0.831959		8	27	2	myoDav1;myoLuc2	0	NA	1
GSDMB	0.232138	0.831959		8	37	7	mm10;nanGal1;hetGla2;eptFus1;myoDav1;myoLuc2;conCri1	25	rheMac3;macFas5;papAnu2;chlSab2;rhiRox1;calJac3;saiBol1;otoGar3;speTri2;rn6;cavPor3;octDeg1;oryCun2;ochPri3;vicPac2;turTru2;orcOrc1;balAcu1;felCat8;canFam3;musFur1;odoRosDiv1;lepWed1;pteVam1;triMan1	5
IL2RB	0.232162	0.831959		10	33	2	myoDav1;myoLuc2	0	NA	1
TMEM60	0.232185	0.831959		10	35	0	NA	1	speTri2	0
CARD18	0.232186	0.831959		5	21	2	hetGla2;eptFus1	6	speTri2;canFam3;musFur1;odoRosDiv1;lepWed1;pteAle1	2
NYX	0.232253	0.831959		6	25	0	NA	0	NA	0
GUCY1B3	0.232541	0.831959		10	34	0	NA	0	NA	0
ANKAR	0.232587	0.831959		8	30	1	nanGal1	1	panPan1	1
FCER2	0.232886	0.831959		8	28	0	NA	0	NA	0
MAGEB18	0.232908	0.831959		10	32	2	nanGal1;hetGla2	3	cavPor3;octDeg1;triMan1	2
ZC3H11A	0.233294	0.831959		10	33	3	micOch1;perManBai1;nanGal1	0	NA	2
COL5A1	0.233408	0.831959		6	25	1	conCri1	2	vicPac2;bosTau8	1
KIF16B	0.23379	0.831959		9	29	0	NA	1	panHod1	0
CST7	0.234079	0.831959		9	33	0	NA	0	NA	0
CISH	0.234113	0.831959		10	37	0	NA	0	NA	0
TEX15	0.234207	0.831959		10	35	2	micOch1;mm10	1	rn6	2
URM1	0.234555	0.831959		8	36	0	NA	0	NA	0
EHMT1	0.234857	0.831959		6	31	0	NA	0	NA	0
RBM34	0.234885	0.831959		7	31	1	perManBai1	0	NA	1
PBX4	0.234891	0.831959		10	29	5	hetGla2;eptFus1;myoDav1;myoLuc2;conCri1	6	cavPor3;ochPri3;equCab2;cerSim1;loxAfr3;triMan1	3
IFT81	0.234946	0.831959		9	32	0	NA	1	balAcu1	0
PAAF1	0.2351	0.831959		9	35	4	micOch1;perManBai1;mm10;nanGal1	2	rn6;turTru2	3
CPSF4L	0.235265	0.831959		10	37	2	hetGla2;conCri1	6	saiBol1;otoGar3;cavPor3;octDeg1;panHod1;canFam3	2
ZNF12	0.235318	0.831959		6	23	0	NA	0	NA	0
NUCB1	0.235346	0.831959		8	29	0	NA	0	NA	0
RAD51AP1	0.235636	0.831959		10	35	0	NA	0	NA	0
TEX43	0.235818	0.831959		9	34	1	nanGal1	0	NA	1
IGSF5	0.236218	0.831959		10	33	1	myoLuc2	2	rhiRox1;saiBol1	1
ST13	0.236352	0.831959		9	30	0	NA	0	NA	0
RARRES2	0.236565	0.831959		9	33	0	NA	0	NA	0
TMEM179B	0.23676	0.831959		10	37	1	hetGla2	1	octDeg1	1
VPS33B	0.236908	0.831959		8	35	0	NA	0	NA	0
PLB1	0.237126	0.831959		8	32	1	conCri1	0	NA	1
CA1	0.237465	0.831959		6	31	0	NA	1	calJac3	0
MTHFS	0.237485	0.831959		7	37	0	NA	0	NA	0
RBM44	0.237628	0.831959		10	29	0	NA	0	NA	0
PARVA	0.237662	0.831959		7	21	1	nanGal1	0	NA	1
AC110615.1	0.238028	0.831959		10	37	2	nanGal1;myoLuc2	11	ochPri3;vicPac2;camFer1;turTru2;orcOrc1;balAcu1;bosTau8;bisBis1;capHir1;pteAle1;pteVam1	2
C17orf102	0.238099	0.831959		9	33	8	micOch1;perManBai1;nanGal1;hetGla2;eptFus1;myoDav1;myoLuc2;conCri1	9	ponAbe2;rhiRox1;calJac3;otoGar3;speTri2;cavPor3;octDeg1;ochPri3;vicPac2	5
HS3ST3A1	0.238195	0.831959		7	22	0	NA	1	camFer1	0
RNASE13	0.238321	0.831959		10	35	1	nanGal1	0	NA	1
UNC79	0.238498	0.831959		9	25	0	NA	0	NA	0
PPP1R13L	0.238657	0.831959		8	26	1	hetGla2	2	octDeg1;bisBis1	1
GRAMD1C	0.239214	0.831959		8	27	0	NA	0	NA	0
CYTH2	0.239304	0.831959		9	34	1	myoDav1	0	NA	1
GPR89B	0.239368	0.831959		10	24	0	NA	0	NA	0
EFCAB14	0.239557	0.831959		10	34	3	eptFus1;myoDav1;myoLuc2	3	vicPac2;camFer1;equCab2	1
SLC17A4	0.239584	0.831959		9	35	1	conCri1	2	canFam3;odoRosDiv1	1
SPRR2F	0.239624	0.831959		7	25	0	NA	0	NA	0
RFX6	0.23969	0.831959		9	33	0	NA	0	NA	0
FASTK	0.24009	0.831959		10	36	0	NA	1	cavPor3	0
SNF8	0.240127	0.831959		9	31	0	NA	0	NA	0
F11	0.240202	0.831959		9	35	2	myoDav1;myoLuc2	1	pteAle1	1
ALDH3B1	0.240255	0.831959		8	26	0	NA	0	NA	0
RSRC2	0.240349	0.831959		10	33	1	nanGal1	0	NA	1
BTBD16	0.240836	0.831959		7	35	0	NA	0	NA	0
KRTAP20_1	0.241059	0.831959		7	37	2	perManBai1;hetGla2	4	saiBol1;vicPac2;canFam3;lepWed1	2
U2AF2	0.241211	0.831959		9	23	1	myoDav1	0	NA	1
FHOD1	0.241375	0.831959		9	30	1	mm10	0	NA	1
MMP9	0.241522	0.831959		8	35	0	NA	0	NA	0
SORCS2	0.241525	0.831959		7	23	0	NA	0	NA	0
BCOR	0.24155	0.831959		9	28	0	NA	0	NA	0
SPACA3	0.241586	0.831959		10	33	0	NA	0	NA	0
[truncated: 11,175 more rows]
