# Supplementary material for: Vision-related convergent gene losses reveal SERPINE3’s unknown role in the eye
Source: eLife. 2022 Jun 21;11:e77999. doi: 10.7554/eLife.77999 (PMC9355568; doi:10.7554/eLife.77999)
Supplement: Figure 1—source data 3. [file elife-77999-fig1-data3.xls]

## Sheet: Figure 1 - Source data 3
Figure 1 - Source data 3: Enrichment of candidate genes in different processes/functions
The five top-ranked Enrichr terms are shown for different ontologies. Terms that are significantly enriched after correcting for multiple testing are in italics (adjusted p<0.05).
Term	Overlap	P-value	Adjusted P-value	-log10 (Adjusted p-value)	Odds Ratio	Combined Score	Genes
Mouse gene atlas
lens	7/947	0.000505269	0.00555796	2.25508	5.90439	44.8168	GRIFIN;CRYGS;GJA10;CRYBB3;CRYBA1;CRYBA4;BIRC7
retina	4/664	0.0186004	0.102302	0.990114	4.33423	17.2701	CRB1;LRIT2;GUCA1B;ARR3
retinal pigment epithelium	3/473	0.0362068	0.132758	0.876938	4.44506	14.751	CRB1;LRIT2;GUCA1B
dendritic cells lymphoid CD8a+	1/142	0.198324	0.505736	0.296077	4.68747	7.58363	GZMK
bladder	1/195	0.262111	0.505736	0.296077	3.39777	4.54957	OPTC
MGI Mouse Phenotype Level 4
total cataract MP:0010263	2/12	0.000151975	0.00851062	2.07004	137.648	1210.17	CRYGS;CRYBA1
abnormal lens fiber morphology MP:0002840	2/37	0.00149702	0.0419167	1.37761	39.2788	255.48	CRYGS;CRYBA1
abnormal lens morphology MP:0001303	3/210	0.00413029	0.0770987	1.11295	10.2288	56.1499	CRYGS;CRYBA1;PKD1L2
increased mitochondrial number MP:0011628	1/6	0.00926509	0.0970652	1.01294	133.093	623.077	CRYBA1
increased corneal epithelium thickness MP:0020854	1/8	0.012335	0.0970652	1.01294	95.0571	417.806	KRT12
GO Biological processes
visual perception (GO:0007601)	6/93	5.75424e-09	1.86586e-07	6.72912	54.8469	1040.63	CRYGS;CRYBB3;CRYBA1;KRT12;CRYBA4;ARR3
sensory perception of light stimulus (GO:0050953)	6/95	6.54689e-09	1.86586e-07	6.72912	53.609	1010.22	CRYGS;CRYBB3;CRYBA1;KRT12;CRYBA4;ARR3
G protein-coupled receptor internalization (GO:0002031)	1/7	0.0108012	0.150212	0.823294	110.906	502.191	ARR3
regulation of lymphocyte apoptotic process (GO:0070228)	1/8	0.012335	0.150212	0.823294	95.0571	417.806	BIRC7
receptor guanylyl cyclase signaling pathway (GO:0007168)	1/10	0.0153956	0.150212	0.823294	73.9259	308.542	GUCA1B
OMIM
cataract	4/47	8.03777e-07	4.01889e-06	5.39589	68.6512	963.447	CRYGS;CRYBB3;CRYBA1;CRYBA4
leber amaurosis	1/13	0.0199695	0.0358158	1.44593	55.4361	216.952	CRB1
corneal dystrophy	1/14	0.0214895	0.0358158	1.44593	51.1692	196.5	KRT12
microphthalmia	1/19	0.0290555	0.0363193	1.43986	36.9463	130.736	CRYBA4
retinitis pigmentosa	1/51	0.0761542	0.0761542	1.11831	13.2793	34.1942	CRB1
