# Supplementary material for: Vision-related convergent gene losses reveal SERPINE3’s unknown role in the eye
Source: eLife. 2022 Jun 21;11:e77999. doi: 10.7554/eLife.77999 (PMC9355568; doi:10.7554/eLife.77999)
Supplement: Figure 1—source data 4. [file elife-77999-fig1-data4.xls]

## Sheet: Figure 1 - Source data 4
Figure 1 - Source data 4: A control forward genomics screen does not retrieve vision-related genes
As a control, we defined sister lineages with high visual acuity values as trait-loss species (elephant, rhinoceros, horse, two flying foxes, guinea pig, degu, squirrel).
Two genes (TUBAL3 and TRIM52) passed the same filters as used for the real screen. Both genes do not have an eye function.
Gene symbol	P-value in Forward Genomics screen	Corrected P-value	Filter: P-value in Forward Genomics screen < 0.05	#Trait-loss species	#Trait-preserving species	#Losses in trait-loss species	Trait-loss species that have lost the gene	#Losses in trait-preserving species	Trait-preserving species with losses	#Losses in trait-loss lineages	Filter: Loss > 2 trait-loss lineages
RP11_520P18.5	3.94433e-07	0.00523925	YES	5	33	0	NA	0	NA	0	NO
TUBAL3	6.26051e-06	0.0415792	YES	7	39	3	octDeg1;pteVam1;loxAfr3	0	NA	3	YES
TRIM52	9.83842e-06	0.0435612	YES	5	26	4	speTri2;cerSim1;pteAle1;loxAfr3	4	otoGar3;vicPac2;camFer1;musFur1	4	YES
RARG	2.14523e-05	0.0712376		7	38	0	NA	0	NA	0
C3orf49	2.85429e-05	0.0745912		6	40	4	equCab2;cerSim1;pteVam1;loxAfr3	6	ochPri3;turTru2;orcOrc1;balAcu1;bosTau8;bisBis1	3
S100A11	3.88917e-05	0.0745912		5	37	0	NA	0	NA	0
SLC10A1	3.93088e-05	0.0745912		8	37	1	loxAfr3	0	NA	1
MCCD1	5.4749e-05	0.0816856		7	38	6	speTri2;cavPor3;octDeg1;equCab2;cerSim1;loxAfr3	5	nanGal1;hetGla2;oryCun2;ochPri3;triMan1	4
SUGCT	6.09429e-05	0.0816856		6	34	2	pteAle1;loxAfr3	0	NA	2
SLC38A5	6.14963e-05	0.0816856		7	33	3	cavPor3;octDeg1;loxAfr3	0	NA	2
GYG2	8.21932e-05	0.099252		4	24	0	NA	0	NA	0
FLYWCH2	0.000129422	0.116713		6	38	1	cavPor3	0	NA	1
PPAP2A	0.000130718	0.116713		8	37	0	NA	0	NA	0
SCARA3	0.000145371	0.116713		8	37	0	NA	0	NA	0
RPGR	0.000175725	0.116713		6	26	0	NA	0	NA	0
DSE	0.000178098	0.116713		5	39	0	NA	0	NA	0
BPIFA1	0.000181468	0.116713		7	39	1	equCab2	0	NA	1
DKK3	0.000186969	0.116713		4	31	1	loxAfr3	0	NA	1
TRPM2	0.00019358	0.116713		5	26	0	NA	0	NA	0
ACOT9	0.000196688	0.116713		8	37	0	NA	0	NA	0
NAALAD2	0.000199657	0.116713		5	34	0	NA	0	NA	0
GGCT	0.000246279	0.116713		8	38	0	NA	0	NA	0
XBP1	0.000247186	0.116713		6	37	0	NA	0	NA	0
UBAP2	0.000253591	0.116713		6	33	1	pteVam1	0	NA	1
OTULIN	0.000301398	0.116713		6	39	0	NA	0	NA	0
TMEM81	0.000308766	0.116713		8	40	0	NA	0	NA	0
MZT1	0.000337337	0.116713		6	35	0	NA	0	NA	0
MBOAT2	0.000346597	0.116713		6	33	0	NA	0	NA	0
SGCZ	0.000367163	0.116713		7	34	1	loxAfr3	0	NA	1
SCNN1G	0.000376622	0.116713		6	37	0	NA	0	NA	0
LRP6	0.000400042	0.116713		7	36	0	NA	0	NA	0
KCNS2	0.000400699	0.116713		6	38	0	NA	0	NA	0
ERO1L	0.000401853	0.116713		6	33	0	NA	0	NA	0
HOOK1	0.000457092	0.116713		7	36	0	NA	0	NA	0
DAO	0.000515324	0.116713		7	35	0	NA	0	NA	0
HPX	0.0005187	0.116713		6	38	0	NA	0	NA	0
DGUOK	0.000527208	0.116713		6	39	0	NA	0	NA	0
GPC4	0.000532262	0.116713		8	34	0	NA	0	NA	0
FUZ	0.000537345	0.116713		6	32	0	NA	0	NA	0
HMCES	0.000547701	0.116713		4	36	1	octDeg1	0	NA	1
B4GALNT1	0.000554183	0.116713		7	38	0	NA	0	NA	0
CROT	0.000554584	0.116713		7	37	0	NA	0	NA	0
RUNDC3B	0.000555296	0.116713		5	37	0	NA	0	NA	0
VIPR2	0.000555505	0.116713		5	31	0	NA	0	NA	0
TSSK3	0.00055907	0.116713		8	40	0	NA	0	NA	0
TRAPPC6B	0.00055907	0.116713		8	40	0	NA	0	NA	0
MFSD2A	0.00055907	0.116713		8	40	0	NA	0	NA	0
GTPBP8	0.00055907	0.116713		8	40	0	NA	0	NA	0
RNASE10	0.00058594	0.116713		7	40	0	NA	0	NA	0
ST6GAL2	0.000620064	0.116713		4	29	0	NA	0	NA	0
NECAP1	0.000621799	0.116713		8	39	1	loxAfr3	0	NA	1
LYSMD3	0.000634185	0.116713		8	39	1	loxAfr3	0	NA	1
L3MBTL4	0.00064246	0.116713		6	36	6	cavPor3;octDeg1;equCab2;cerSim1;pteAle1;loxAfr3	8	micOch1;hetGla2;panHod1;bosTau8;bisBis1;capHir1;triMan1;chrAsi1	4
DNAJB14	0.000645803	0.116713		6	38	1	loxAfr3	0	NA	1
TARS	0.000646217	0.116713		6	38	0	NA	0	NA	0
PSMD11	0.000654447	0.116713		6	38	0	NA	0	NA	0
FAM198B	0.000656309	0.116713		6	33	0	NA	0	NA	0
CDHR1	0.000694507	0.116713		7	36	0	NA	0	NA	0
LRGUK	0.000695887	0.116713		7	36	0	NA	0	NA	0
QDPR	0.00069665	0.116713		8	38	0	NA	0	NA	0
CNIH4	0.000704037	0.116713		7	39	0	NA	0	NA	0
PIP4K2B	0.000704448	0.116713		7	39	0	NA	0	NA	0
PDCL2	0.000704448	0.116713		7	39	0	NA	0	NA	0
CDCA5	0.000704469	0.116713		7	39	0	NA	0	NA	0
FAM126A	0.000704485	0.116713		7	39	0	NA	0	NA	0
CAPZA2	0.000705202	0.116713		7	39	0	NA	0	NA	0
ZFP64	0.000707811	0.116713		6	37	0	NA	0	NA	0
MAS1	0.000713348	0.116713		7	36	0	NA	0	NA	0
SPSB1	0.000713637	0.116713		8	38	0	NA	0	NA	0
ABHD17B	0.000717297	0.116713		8	38	0	NA	0	NA	0
SPPL3	0.000717406	0.116713		8	38	0	NA	0	NA	0
GPR156	0.000719827	0.116713		8	38	0	NA	0	NA	0
MPI	0.000719831	0.116713		8	38	0	NA	0	NA	0
TMEM147	0.000719848	0.116713		8	38	0	NA	0	NA	0
ITGA2B	0.000772657	0.116713		6	31	0	NA	0	NA	0
KCTD1	0.000790788	0.116713		8	37	0	NA	0	NA	0
PMFBP1	0.00079342	0.116713		7	37	0	NA	0	NA	0
MRO	0.000794488	0.116713		7	38	0	NA	0	NA	0
SH3BP5L	0.000796304	0.116713		7	38	0	NA	0	NA	0
SFRP4	0.000799273	0.116713		7	38	0	NA	0	NA	0
L3MBTL2	0.000799785	0.116713		7	38	0	NA	0	NA	0
EPB42	0.000799937	0.116713		7	38	0	NA	0	NA	0
UBE2D1	0.000805564	0.116713		8	37	0	NA	0	NA	0
PLIN5	0.000806341	0.116713		6	27	1	speTri2	0	NA	1
FAM131B	0.000807777	0.116713		8	37	0	NA	0	NA	0
KCNJ3	0.000811051	0.116713		7	35	0	NA	0	NA	0
API5	0.000812364	0.116713		8	37	0	NA	0	NA	0
TMEM221	0.000815219	0.116713		4	24	1	cerSim1	0	NA	1
TBC1D20	0.000815413	0.116713		8	37	0	NA	0	NA	0
ZSWIM3	0.00081585	0.116713		8	37	0	NA	0	NA	0
B3GNT8	0.00081636	0.116713		8	37	1	loxAfr3	0	NA	1
RHBDL3	0.000816635	0.116713		8	37	0	NA	0	NA	0
SLC25A35	0.000817161	0.116713		8	37	0	NA	0	NA	0
AP2S1	0.000838693	0.118514		6	32	1	loxAfr3	0	NA	1
KIAA0930	0.000891106	0.119314		7	37	0	NA	0	NA	0
TUFM	0.000899236	0.119314		7	37	0	NA	0	NA	0
TAB1	0.000907398	0.119314		8	36	0	NA	0	NA	0
HNRNPUL1	0.000908123	0.119314		7	37	0	NA	0	NA	0
AIG1	0.000908974	0.119314		7	37	0	NA	0	NA	0
PLCXD3	0.000909508	0.119314		7	37	0	NA	0	NA	0
C16orf91	0.000918793	0.119314		7	34	0	NA	0	NA	0
C19orf47	0.000923762	0.119314		6	35	1	loxAfr3	0	NA	1
CDC27	0.000925196	0.119314		8	36	0	NA	0	NA	0
NMNAT2	0.000993721	0.126646		7	36	0	NA	0	NA	0
SEC23B	0.00100112	0.126646		7	36	0	NA	0	NA	0
INTS7	0.00102485	0.126683		8	35	0	NA	0	NA	0
EIF3I	0.00103155	0.126683		7	36	0	NA	0	NA	0
ZDHHC19	0.00103359	0.126683		6	35	2	speTri2;equCab2	1	tarSyr2	2
FAM122A	0.00104444	0.126683		8	35	0	NA	0	NA	0
XK	0.00104909	0.126683		8	35	0	NA	0	NA	0
NDN	0.00110166	0.131832		6	29	0	NA	0	NA	0
TFR2	0.00113324	0.134401		7	33	0	NA	0	NA	0
LMO3	0.00117168	0.137688		7	35	0	NA	0	NA	0
BGN	0.00118419	0.137688		8	34	0	NA	0	NA	0
P2RX6	0.00119212	0.137688		7	32	2	equCab2;cerSim1	1	otoGar3	1
NR1H2	0.00120242	0.137688		7	34	0	NA	0	NA	0
EFCAB2	0.00122006	0.138514		7	35	2	equCab2;cerSim1	0	NA	1
WRAP53	0.00123245	0.138735		8	38	0	NA	0	NA	0
TCF24	0.00127587	0.141542		4	24	0	NA	0	NA	0
FGF12	0.00127871	0.141542		7	34	0	NA	0	NA	0
KLHL22	0.00130157	0.142883		7	34	0	NA	0	NA	0
MTPAP	0.0013248	0.14424		6	37	0	NA	0	NA	0
SLC45A1	0.00137266	0.148236		7	31	0	NA	0	NA	0
GCAT	0.00140339	0.150332		8	36	1	loxAfr3	0	NA	1
TOX3	0.00141573	0.150441		7	33	0	NA	0	NA	0
ZNF423	0.00144999	0.151833		7	33	0	NA	0	NA	0
ARG2	0.00145169	0.151833		8	40	0	NA	0	NA	0
SLAMF8	0.00148173	0.153478		7	39	0	NA	0	NA	0
UPK3A	0.00149053	0.153478		7	33	0	NA	0	NA	0
DECR2	0.00151354	0.154451		8	32	1	loxAfr3	0	NA	1
CCDC61	0.00152323	0.154451		4	25	1	pteVam1	0	NA	1
APOC4	0.00156956	0.157943		8	35	2	pteAle1;pteVam1	0	NA	1
IGFBP4	0.00159622	0.159418		6	28	0	NA	0	NA	0
CCDC92	0.00161103	0.159697		7	32	0	NA	0	NA	0
ZNF555	0.00164091	0.161453		6	30	2	cavPor3;loxAfr3	1	perManBai1	2
GAS2L3	0.00165323	0.161469		7	36	1	octDeg1	0	NA	1
HIST3H2BB	0.00170587	0.165394		7	34	2	octDeg1;pteAle1	0	NA	2
ANKRD13C	0.00184342	0.177436		6	28	0	NA	0	NA	0
CCDC34	0.00191796	0.180909		5	34	0	NA	0	NA	0
GNB4	0.00194491	0.180909		7	37	1	loxAfr3	0	NA	1
HS6ST2	0.00195552	0.180909		6	26	0	NA	0	NA	0
FETUB	0.00195906	0.180909		6	36	1	loxAfr3	0	NA	1
DEPTOR	0.00198109	0.180909		8	31	0	NA	0	NA	0
HIST3H2A	0.00198266	0.180909		7	36	2	cavPor3;pteAle1	0	NA	2
DDB2	0.00199113	0.180909		8	40	0	NA	0	NA	0
TMCO4	0.00199661	0.180909		7	35	0	NA	0	NA	0
PPFIA4	0.00200208	0.180909		6	32	0	NA	0	NA	0
NFASC	0.00206153	0.184877		7	31	0	NA	0	NA	0
LETM1	0.00209443	0.184877		8	29	0	NA	0	NA	0
RABL2B	0.00209587	0.184877		8	32	2	equCab2;cerSim1	0	NA	1
CUEDC1	0.00210167	0.184877		4	21	0	NA	0	NA	0
NAAA	0.00212235	0.185468		7	38	1	loxAfr3	0	NA	1
PLET1	0.00220153	0.190203		8	30	4	cavPor3;cerSim1;pteAle1;pteVam1	0	NA	3
HPGD	0.00220517	0.190203		7	39	0	NA	0	NA	0
ZNF407	0.00228868	0.196132		7	33	1	equCab2	0	NA	1
CRCT1	0.00244246	0.206783		5	32	0	NA	0	NA	0
MTA3	0.00244409	0.206783		8	37	0	NA	0	NA	0
BRCA1	0.00246395	0.207144		8	34	1	speTri2	0	NA	1
TSPAN10	0.00250879	0.209587		8	33	2	cerSim1;loxAfr3	0	NA	2
PRDM4	0.00254585	0.211353		8	38	0	NA	0	NA	0
RIMS4	0.00260246	0.214711		8	37	0	NA	0	NA	0
DGKK	0.00278744	0.228553		6	30	1	loxAfr3	0	NA	1
CLEC2A	0.00282341	0.230082		5	27	1	cerSim1	0	NA	1
HMSD	0.00289819	0.234135		5	26	5	speTri2;octDeg1;equCab2;pteAle1;loxAfr3	9	tarSyr2;otoGar3;micOch1;mm10;oryCun2;ochPri3;vicPac2;odoRosDiv1;conCri1	5
SLC17A1	0.00294996	0.234135		6	32	2	cerSim1;loxAfr3	0	NA	2
ARHGEF9	0.00297327	0.234135		7	27	0	NA	0	NA	0
FAM46A	0.00298015	0.234135		7	27	1	loxAfr3	0	NA	1
RCN1	0.00298745	0.234135		4	32	1	speTri2	0	NA	1
TMEM185A	0.00299354	0.234135		7	26	0	NA	0	NA	0
PDDC1	0.00299929	0.234135		8	34	0	NA	0	NA	0
SLC43A3	0.00301416	0.234135		5	35	2	cavPor3;octDeg1	1	oryCun2	1
PTPN13	0.00305569	0.235981		7	29	0	NA	0	NA	0
HSP90B1	0.00311036	0.238785		7	40	0	NA	0	NA	0
TLK2	0.00312796	0.238785		6	35	0	NA	0	NA	0
COG1	0.00317783	0.240114		6	37	1	cavPor3	0	NA	1
NDUFS5	0.00318151	0.240114		8	36	0	NA	0	NA	0
STARD5	0.00329213	0.247058		7	36	0	NA	0	NA	0
TMEM255B	0.00335508	0.250368		6	30	0	NA	0	NA	0
RIPPLY1	0.00337954	0.250785		8	38	4	cavPor3;octDeg1;pteAle1;pteVam1	0	NA	2
XPNPEP2	0.00346247	0.255511		7	34	0	NA	0	NA	0
TNFSF18	0.0034989	0.255875		7	38	0	NA	0	NA	0
ZNF500	0.00350592	0.255875		7	36	4	octDeg1;equCab2;cerSim1;loxAfr3	3	mm10;hetGla2;triMan1	3
EIF3CL	0.00353613	0.256264		6	37	1	pteAle1	0	NA	1
PRKCZ	0.00356013	0.256264		7	26	0	NA	0	NA	0
ITGAM	0.00356914	0.256264		5	33	0	NA	0	NA	0
PARP6	0.00363219	0.259389		7	36	0	NA	0	NA	0
SLC44A5	0.00368432	0.260329		5	34	0	NA	0	NA	0
ANKRD37	0.00368455	0.260329		8	39	1	loxAfr3	0	NA	1
XPC	0.003747	0.261419		7	34	1	speTri2	0	NA	1
2012-09-01	0.00375433	0.261419		7	36	0	NA	0	NA	0
IDO2	0.00377586	0.261419		6	36	1	pteAle1	0	NA	1
PXDNL	0.00377869	0.261419		6	29	6	cavPor3;octDeg1;equCab2;cerSim1;pteAle1;loxAfr3	13	otoGar3;rn6;nanGal1;hetGla2;camFer1;orcOrc1;balAcu1;panHod1;bosTau8;bisBis1;capHir1;triMan1;chrAsi1	4
EIF3C	0.00398878	0.274484		6	36	1	pteAle1	0	NA	1
FGF3	0.00400926	0.274484		4	25	0	NA	0	NA	0
TDRD3	0.00402954	0.274484		6	35	1	speTri2	1	rn6	1
LPL	0.00424762	0.287863		6	32	0	NA	0	NA	0
LGI3	0.00430748	0.290438		7	37	1	loxAfr3	0	NA	1
HTR3B	0.00441251	0.296017		6	37	2	equCab2;pteAle1	0	NA	2
REP15	0.00464478	0.310033		6	37	2	cavPor3;loxAfr3	0	NA	2
SULT1C3	0.00468779	0.311339		6	26	5	speTri2;cavPor3;octDeg1;equCab2;cerSim1	3	balAcu1;canFam3;lepWed1	3
CLCN2	0.00472133	0.312007		8	39	1	loxAfr3	0	NA	1
AADACL4	0.00477743	0.312928		7	33	3	equCab2;cerSim1;loxAfr3	3	turTru2;orcOrc1;balAcu1	2
TRAM2	0.00478238	0.312928		7	36	0	NA	0	NA	0
SAFB	0.00489542	0.318754		6	29	0	NA	0	NA	0
SPINT3	0.00521031	0.337603		6	36	3	cavPor3;cerSim1;loxAfr3	5	otoGar3;ochPri3;turTru2;orcOrc1;canFam3	3
PRTN3	0.00524632	0.338286		5	32	3	speTri2;cavPor3;loxAfr3	2	vicPac2;camFer1	3
SHROOM3	0.00541297	0.344173		4	21	3	cavPor3;octDeg1;loxAfr3	1	hetGla2	2
BTN2A1	0.00543919	0.344173		4	31	4	cavPor3;equCab2;cerSim1;loxAfr3	10	micOch1;perManBai1;mm10;nanGal1;hetGla2;oryCun2;eptFus1;myoDav1;triMan1;chrAsi1	3
MANEA	0.00547058	0.344173		7	31	0	NA	0	NA	0
TSPYL5	0.0054727	0.344173		7	28	2	cavPor3;octDeg1	0	NA	1
DDRGK1	0.00549902	0.344173		7	38	0	NA	0	NA	0
CYP2C9	0.00550327	0.344173		5	25	3	cavPor3;pteAle1;loxAfr3	2	otoGar3;perManBai1	3
VGF	0.005519	0.344173		6	22	1	loxAfr3	0	NA	1
MLPH	0.00555084	0.344541		7	32	0	NA	0	NA	0
KIFC1	0.00563254	0.347986		6	35	0	NA	0	NA	0
ZMYM4	0.00567974	0.349278		7	32	2	cavPor3;octDeg1	0	NA	1
SLC25A21	0.00586922	0.358464		7	37	0	NA	0	NA	0
ZFP42	0.0058831	0.358464		7	36	1	pteAle1	0	NA	1
DERL3	0.00598199	0.361622		7	34	0	NA	0	NA	0
TGFBR3	0.00598937	0.361622		6	36	0	NA	0	NA	0
PGC	0.00623453	0.374403		8	35	4	equCab2;cerSim1;pteAle1;pteVam1	3	canFam3;odoRosDiv1;lepWed1	2
XPO6	0.00627205	0.374403		6	34	0	NA	0	NA	0
TOM1	0.0063027	0.374403		6	33	0	NA	0	NA	0
AMDHD1	0.00632556	0.374403		7	39	1	pteAle1	0	NA	1
SLC39A14	0.00634199	0.374403		6	38	0	NA	0	NA	0
CCDC174	0.00637124	0.374465		6	37	2	octDeg1;cerSim1	0	NA	2
WDR64	0.00640469	0.374773		5	31	0	NA	0	NA	0
RAB26	0.00648399	0.377749		6	25	1	loxAfr3	0	NA	1
PRKCI	0.00652913	0.378718		7	31	0	NA	0	NA	0
BUB1	0.00660632	0.379932		5	28	0	NA	0	NA	0
SPP2	0.00660732	0.379932		7	36	0	NA	0	NA	0
UROC1	0.00663586	0.379932		5	34	1	pteAle1	1	panPan1	1
TEK	0.00677365	0.384893		5	36	0	NA	0	NA	0
GAA	0.00678047	0.384893		6	33	0	NA	0	NA	0
IL4I1	0.00685515	0.387477		4	27	0	NA	0	NA	0
PTGER2	0.00690519	0.388651		7	36	0	NA	0	NA	0
NT5C	0.00698687	0.391445		5	28	0	NA	0	NA	0
DDX47	0.00701378	0.391445		7	38	0	NA	0	NA	0
RP4_533D7.6	0.00705654	0.392184		7	36	0	NA	0	NA	0
RP11_145E5.5	0.00709974	0.392941		7	38	1	equCab2	0	NA	1
AQP5	0.00714336	0.393715		6	29	0	NA	0	NA	0
PKIB	0.00719386	0.39486		7	39	0	NA	0	NA	0
SPIN1	0.00735902	0.401157		5	38	0	NA	0	NA	0
TMC7	0.007369	0.401157		4	31	0	NA	0	NA	0
KIF22	0.00741261	0.401884		7	39	0	NA	0	NA	0
SERPINB8	0.00759609	0.410158		7	36	1	pteAle1	0	NA	1
SERP2	0.00762842	0.410236		4	28	0	NA	0	NA	0
CYP4F8	0.00780319	0.417302		5	23	2	octDeg1;loxAfr3	4	tarSyr2;nanGal1;turTru2;orcOrc1	2
TPSB2	0.00782265	0.417302		6	26	3	speTri2;cavPor3;cerSim1	2	tarSyr2;nanGal1	3
QRFP	0.00794548	0.420358		8	40	0	NA	0	NA	0
HIST1H2AI	0.00796026	0.420358		4	27	1	pteVam1	0	NA	1
ZSCAN4	0.00798029	0.420358		4	27	1	cerSim1	1	mm10	1
PTGR2	0.00803999	0.420358		7	40	2	pteAle1;pteVam1	0	NA	1
C3orf33	0.00807035	0.420358		7	37	0	NA	0	NA	0
SLC4A3	0.0080831	0.420358		7	36	0	NA	0	NA	0
FABP6	0.00810145	0.420358		8	39	2	pteAle1;pteVam1	0	NA	1
ERCC8	0.00813509	0.420461		5	36	1	cavPor3	0	NA	1
FPGT_TNNI3K	0.00838629	0.431762		6	33	2	cavPor3;octDeg1	0	NA	1
FOCAD	0.00841875	0.431762		7	31	0	NA	0	NA	0
HEPACAM2	0.0084761	0.433031		6	39	0	NA	0	NA	0
MOGAT2	0.00865739	0.440598		6	36	1	pteAle1	0	NA	1
CISD1	0.00878973	0.445245		8	38	0	NA	0	NA	0
NPY4R	0.00882701	0.445245		6	35	1	speTri2	0	NA	1
TVP23A	0.00887742	0.445245		7	39	0	NA	0	NA	0
TRPV4	0.00890068	0.445245		6	29	0	NA	0	NA	0
MDP1	0.00891629	0.445245		7	39	1	octDeg1	0	NA	1
TMEM71	0.00910197	0.45213		8	40	2	cavPor3;octDeg1	0	NA	1
NDE1	0.00917006	0.45213		6	37	0	NA	0	NA	0
STXBP2	0.00921775	0.45213		7	36	1	pteAle1	0	NA	1
ZNF256	0.00927604	0.45213		4	24	4	speTri2;cavPor3;equCab2;cerSim1	9	turTru2;orcOrc1;balAcu1;bosTau8;bisBis1;capHir1;felCat8;canFam3;conCri1	3
BICD1	0.00929177	0.45213		6	35	0	NA	0	NA	0
KLF11	0.00934787	0.45213		7	39	0	NA	0	NA	0
LRRC30	0.00934815	0.45213		7	39	0	NA	0	NA	0
MAFB	0.00943376	0.45213		5	25	0	NA	0	NA	0
GPHN	0.00944897	0.45213		7	31	0	NA	0	NA	0
ETV3	0.00947563	0.45213		6	38	0	NA	0	NA	0
SPAM1	0.00948959	0.45213		7	37	1	loxAfr3	0	NA	1
CDC25C	0.0095282	0.45213		7	32	4	speTri2;cavPor3;octDeg1;loxAfr3	1	panPan1	3
NCOA7	0.00953775	0.45213		7	39	0	NA	0	NA	0
SS18	0.00957554	0.45213		6	40	0	NA	0	NA	0
MOCS2	0.00960052	0.45213		7	38	0	NA	0	NA	0
UBXN7	0.00961783	0.45213		6	36	0	NA	0	NA	0
C6orf195	0.00963282	0.45213		7	39	6	speTri2;octDeg1;equCab2;cerSim1;pteAle1;loxAfr3	22	rheMac3;macFas5;papAnu2;chlSab2;rhiRox1;calJac3;otoGar3;micOch1;perManBai1;mm10;nanGal1;oryCun2;bosTau8;bisBis1;felCat8;canFam3;odoRosDiv1;lepWed1;eptFus1;myoDav1;myoLuc2;conCri1	5
SLC6A11	0.00971263	0.452498		6	33	0	NA	0	NA	0
HCST	0.00972226	0.452498		7	40	1	octDeg1	0	NA	1
AADACL3	0.00974287	0.452498		7	38	1	loxAfr3	0	NA	1
SNAPC3	0.00981698	0.454352		6	36	0	NA	0	NA	0
NPEPL1	0.00989142	0.456207		7	35	1	loxAfr3	0	NA	1
MEGF9	0.0100314	0.459271		4	22	0	NA	0	NA	0
MGAT4C	0.0100494	0.459271		7	38	0	NA	0	NA	0
BBX	0.0100616	0.459271		7	38	0	NA	0	NA	0
UBQLN2	0.010159	0.459794		7	27	0	NA	0	NA	0
NXT2	0.0101683	0.459794		7	38	0	NA	0	NA	0
ARHGAP36	0.0101769	0.459794		8	36	2	pteAle1;pteVam1	0	NA	1
TRPC3	0.0102334	0.460567		6	34	0	NA	0	NA	0
APMAP	0.0102633	0.460567		8	36	2	pteAle1;pteVam1	0	NA	1
CHST9	0.0103563	0.463173		7	38	0	NA	0	NA	0
CMTM2	0.0105885	0.471972		7	35	0	NA	0	NA	0
SDR16C5	0.0106303	0.472248		8	37	2	pteAle1;pteVam1	0	NA	1
NPL	0.0106706	0.472461		7	37	0	NA	0	NA	0
DNAI1	0.0108366	0.477041		7	37	0	NA	0	NA	0
CTSW	0.0108459	0.477041		7	37	0	NA	0	NA	0
ZSCAN26	0.010982	0.481184		8	36	1	speTri2	0	NA	1
CXCR6	0.0110126	0.481184		6	38	0	NA	0	NA	0
VIL1	0.0112765	0.491101		6	35	0	NA	0	NA	0
RPGRIP1L	0.0113621	0.492998		7	38	0	NA	0	NA	0
TEX9	0.0113943	0.492998		6	34	0	NA	0	NA	0
GPRASP2	0.0116678	0.501344		5	32	0	NA	0	NA	0
PDIA2	0.0117066	0.501344		7	33	1	loxAfr3	0	NA	1
CH507_9B2.5	0.0117382	0.501344		7	35	1	pteAle1	0	NA	1
PWP2	0.0117382	0.501344		7	35	1	pteAle1	0	NA	1
MC3R	0.0117811	0.501564		7	36	0	NA	0	NA	0
SLC25A29	0.0120205	0.508084		6	34	0	NA	0	NA	0
TTC17	0.0121289	0.508084		7	35	0	NA	0	NA	0
ARID1A	0.0121431	0.508084		7	35	0	NA	0	NA	0
LTBP2	0.0121645	0.508084		7	31	2	cavPor3;pteAle1	0	NA	2
PLSCR4	0.0121894	0.508084		7	35	0	NA	0	NA	0
SPIC	0.0122492	0.508084		8	40	0	NA	0	NA	0
YDJC	0.0122715	0.508084		7	34	0	NA	0	NA	0
PLK4	0.0122742	0.508084		6	37	1	speTri2	0	NA	1
SPAST	0.0122785	0.508084		6	34	0	NA	0	NA	0
DNMT1	0.0123745	0.50898		7	33	0	NA	0	NA	0
GPR84	0.0124057	0.50898		8	40	2	pteAle1;pteVam1	0	NA	1
SLC7A6	0.012427	0.50898		7	36	0	NA	0	NA	0
MAGEA10	0.0124534	0.50898		6	28	2	equCab2;loxAfr3	0	NA	2
PRPF4	0.0125172	0.509963		7	35	1	pteAle1	0	NA	1
ALDH8A1	0.0125542	0.509963		7	38	1	pteAle1	0	NA	1
STAT3	0.0126832	0.513631		7	35	0	NA	0	NA	0
MCAM	0.0127436	0.514373		8	34	0	NA	0	NA	0
TRMT6	0.0128177	0.514373		8	40	1	speTri2	0	NA	1
C1QA	0.0128177	0.514373		8	40	0	NA	0	NA	0
EXOC1	0.0129772	0.518399		7	35	0	NA	0	NA	0
PTPRD	0.0130425	0.518399		6	32	0	NA	0	NA	0
JMJD8	0.0130713	0.518399		7	36	1	loxAfr3	0	NA	1
PRR22	0.0130741	0.518399		6	29	0	NA	0	NA	0
ADCY7	0.0132086	0.522015		6	31	0	NA	0	NA	0
FCGR3A	0.0132439	0.522015		6	34	0	NA	0	NA	0
CHMP4A	0.0133013	0.522727		7	40	3	cavPor3;pteAle1;pteVam1	3	perManBai1;mm10;rn6	2
CMTR1	0.0135226	0.529855		6	37	0	NA	0	NA	0
CLEC2D	0.0136482	0.530378		4	22	1	octDeg1	1	mm10	1
TIMP4	0.0136554	0.530378		8	39	0	NA	0	NA	0
NXPE3	0.0136558	0.530378		8	39	1	speTri2	0	NA	1
KIF24	0.0137053	0.530749		7	38	0	NA	0	NA	0
PLCH1	0.0138517	0.53461		7	34	0	NA	0	NA	0
MRPL9	0.0138854	0.53461		6	38	0	NA	0	NA	0
TNFRSF1B	0.0139913	0.537129		6	36	1	loxAfr3	2	oryCun2;ochPri3	1
PABPC4L	0.0140673	0.538491		6	31	0	NA	0	NA	0
CRELD2	0.0141328	0.538845		6	28	0	NA	0	NA	0
ENPP7	0.0141577	0.538845		7	34	2	cavPor3;pteAle1	0	NA	2
MYO1B	0.0142166	0.539539		6	31	1	pteAle1	0	NA	1
CEP162	0.0144934	0.548478		6	36	1	loxAfr3	1	nanGal1	1
ZNF689	0.014551	0.549092		8	38	0	NA	0	NA	0
VAMP7	0.0146007	0.549409		6	32	0	NA	0	NA	0
TUBA3E	0.0146508	0.549737		7	28	4	equCab2;cerSim1;pteAle1;pteVam1	1	oryCun2	2
BTD	0.0146957	0.549867		8	38	1	speTri2	0	NA	1
SEC24D	0.0148696	0.554812		6	31	0	NA	0	NA	0
UIMC1	0.0150531	0.558882		8	38	0	NA	0	NA	0
KCNV1	0.0150628	0.558882		7	31	0	NA	0	NA	0
SETD2	0.0151065	0.558941		7	28	1	pteAle1	0	NA	1
TUBA3D	0.0152504	0.559622		7	27	4	equCab2;cerSim1;pteAle1;pteVam1	1	oryCun2	2
TNIP1	0.015278	0.559622		8	36	0	NA	0	NA	0
SCT	0.0154261	0.559622		6	21	1	speTri2	0	NA	1
BBS4	0.0154338	0.559622		6	33	1	cavPor3	0	NA	1
MRPS5	0.0154813	0.559622		8	37	1	speTri2	0	NA	1
WDR44	0.0155038	0.559622		5	32	0	NA	0	NA	0
LUZP1	0.0155071	0.559622		8	37	0	NA	0	NA	0
HPSE2	0.015527	0.559622		6	33	0	NA	0	NA	0
TEX36	0.0155319	0.559622		7	39	0	NA	0	NA	0
LRRC34	0.0155462	0.559622		8	37	0	NA	0	NA	0
SLC15A5	0.0156606	0.560813		6	30	3	equCab2;cerSim1;loxAfr3	4	panPan1;ochPri3;vicPac2;panHod1	2
STXBP5	0.0156637	0.560813		6	34	0	NA	0	NA	0
CLCA2	0.0157868	0.562797		6	36	2	pteAle1;pteVam1	1	ochPri3	1
MAGIX	0.0158039	0.562797		8	38	3	cavPor3;pteVam1;loxAfr3	0	NA	3
RBM8A	0.0158712	0.563682		8	38	1	loxAfr3	0	NA	1
FAM3B	0.0159474	0.56488		7	33	1	pteAle1	0	NA	1
PMAIP1	0.0159923	0.564964		6	33	0	NA	0	NA	0
MALT1	0.0160427	0.56524		6	33	0	NA	0	NA	0
RFX5	0.0161551	0.567205		5	40	0	NA	0	NA	0
NEUROG1	0.016215	0.567205		6	29	0	NA	0	NA	0
CHIC2	0.0162363	0.567205		7	32	0	NA	0	NA	0
GLDN	0.0162693	0.567205		6	37	0	NA	0	NA	0
CORO2A	0.0163477	0.568447		7	37	0	NA	0	NA	0
THUMPD1	0.0164357	0.570013		7	35	2	cerSim1;pteVam1	0	NA	2
BLID	0.0170129	0.588497		6	34	6	speTri2;cavPor3;octDeg1;equCab2;cerSim1;pteAle1	25	ponAbe2;rheMac3;macFas5;papAnu2;rhiRox1;calJac3;saiBol1;tarSyr2;otoGar3;micOch1;perManBai1;mm10;nanGal1;hetGla2;oryCun2;vicPac2;camFer1;bosTau8;bisBis1;capHir1;canFam3;musFur1;odoRosDiv1;lepWed1;conCri1	4
DEFB103A	0.0171944	0.59323		6	37	1	cerSim1	0	NA	1
OSBPL1A	0.0173274	0.596009		6	31	2	equCab2;cerSim1	0	NA	1
FAM114A1	0.0174307	0.596009		7	36	0	NA	0	NA	0
NOVA1	0.0174436	0.596009		7	32	0	NA	0	NA	0
IRX1	0.0174545	0.596009		5	21	0	NA	0	NA	0
FAM19A4	0.0177181	0.603459		7	39	0	NA	0	NA	0
RNF175	0.0177985	0.604645		7	37	3	cavPor3;pteAle1;loxAfr3	5	micOch1;perManBai1;mm10;rn6;balAcu1	3
KRT38	0.0178439	0.604645		7	30	3	speTri2;cerSim1;loxAfr3	2	mm10;turTru2	3
RPS6KA3	0.0179024	0.605082		6	34	1	speTri2	0	NA	1
CCDC179	0.0179816	0.605814		7	36	0	NA	0	NA	0
ARHGAP42	0.0180152	0.605814		6	33	0	NA	0	NA	0
NKX6_3	0.0180947	0.606948		6	29	0	NA	0	NA	0
DCDC2	0.0182348	0.608804		6	34	0	NA	0	NA	0
TNNI3K	0.0182417	0.608804		6	33	2	cavPor3;octDeg1	1	hetGla2	1
SUPT20H	0.0182952	0.60906		6	37	0	NA	0	NA	0
LOX	0.0183609	0.609446		5	29	0	NA	0	NA	0
ZNF564	0.0183985	0.609446		4	23	3	speTri2;octDeg1;loxAfr3	9	perManBai1;vicPac2;camFer1;balAcu1;bosTau8;bisBis1;canFam3;odoRosDiv1;lepWed1	3
PPP2CB	0.0185213	0.611986		7	36	1	speTri2	0	NA	1
DPYSL3	0.0186824	0.614658		7	35	0	NA	0	NA	0
BCKDHB	0.0187317	0.614658		7	31	0	NA	0	NA	0
WBP1L	0.018741	0.614658		7	35	0	NA	0	NA	0
FGFBP1	0.0187995	0.615059		6	35	0	NA	0	NA	0
EFCAB12	0.0188897	0.615203		7	34	1	cerSim1	0	NA	1
CACNA1I	0.0188966	0.615203		5	22	2	cavPor3;pteAle1	1	rn6	2
TFF3	0.0191452	0.621196		7	35	0	NA	0	NA	0
FBXW12	0.0191742	0.621196		6	28	4	speTri2;cavPor3;equCab2;cerSim1	6	orcOrc1;balAcu1;panHod1;bosTau8;bisBis1;capHir1	3
ZDHHC4	0.0197165	0.63713		7	37	0	NA	0	NA	0
KIF20B	0.0197619	0.63713		7	32	6	speTri2;cavPor3;octDeg1;cerSim1;pteAle1;loxAfr3	7	micOch1;mm10;hetGla2;oryCun2;orcOrc1;balAcu1;chrAsi1	5
HIST1H2BD	0.0198967	0.638179		8	37	1	cavPor3	0	NA	1
HSFX2	0.0199553	0.638179		7	22	7	cavPor3;octDeg1;equCab2;cerSim1;pteAle1;pteVam1;loxAfr3	10	mm10;nanGal1;hetGla2;oryCun2;balAcu1;panHod1;bosTau8;canFam3;triMan1;chrAsi1	4
SLC27A6	0.0199571	0.638179		7	30	1	pteAle1	0	NA	1
CDH8	0.0199866	0.638179		6	28	0	NA	0	NA	0
NME8	0.0201314	0.639782		7	36	1	speTri2	0	NA	1
DEFB129	0.0201332	0.639782		7	37	1	pteAle1	0	NA	1
C6orf164	0.0202999	0.641537		7	35	0	NA	0	NA	0
C3orf70	0.0203124	0.641537		5	26	0	NA	0	NA	0
KLK2	0.0203333	0.641537		5	25	2	cerSim1;loxAfr3	1	calJac3	2
AC008074.1	0.0204254	0.642517		6	40	6	speTri2;octDeg1;equCab2;cerSim1;pteAle1;loxAfr3	27	otoGar3;micOch1;perManBai1;mm10;rn6;nanGal1;oryCun2;vicPac2;camFer1;turTru2;orcOrc1;balAcu1;panHod1;bosTau8;bisBis1;capHir1;felCat8;canFam3;musFur1;odoRosDiv1;lepWed1;eptFus1;myoDav1;myoLuc2;conCri1;triMan1;chrAsi1	5
MGAT5B	0.0204611	0.642517		6	27	0	NA	0	NA	0
STRA8	0.0205945	0.644765		8	36	4	cerSim1;pteAle1;pteVam1;loxAfr3	3	bosTau8;bisBis1;myoLuc2	3
HIST1H3F	0.0206297	0.644765		7	34	0	NA	0	NA	0
ACTRT2	0.020689	0.644889		7	35	0	NA	0	NA	0
AIFM3	0.0207308	0.644889		7	34	0	NA	0	NA	0
GRTP1	0.0209153	0.648224		7	30	0	NA	0	NA	0
C10orf12	0.0209965	0.648224		8	38	2	equCab2;cerSim1	1	tarSyr2	1
VGLL2	0.0210416	0.648224		6	22	0	NA	0	NA	0
R3HCC1	0.0210759	0.648224		7	38	0	NA	0	NA	0
ABHD10	0.0210866	0.648224		7	36	0	NA	0	NA	0
CYP2A7	0.0211308	0.648224		6	21	1	speTri2	0	NA	1
TRPM8	0.0212197	0.64945		7	31	0	NA	0	NA	0
KRTAP13_1	0.0213475	0.649548		6	38	3	cavPor3;octDeg1;loxAfr3	1	triMan1	2
ADAMTS17	0.0213708	0.649548		6	28	0	NA	0	NA	0
NOXO1	0.0214051	0.649548		8	34	1	loxAfr3	1	chrAsi1	1
IL17C	0.0214185	0.649548		7	34	1	loxAfr3	0	NA	1
DCXR	0.0216195	0.653918		5	29	0	NA	0	NA	0
CD5L	0.0216611	0.653918		6	34	1	loxAfr3	0	NA	1
RABEP2	0.0218911	0.659365		8	34	0	NA	0	NA	0
KREMEN1	0.0219453	0.659501		8	37	0	NA	0	NA	0
PLEKHG4B	0.0222187	0.666209		5	25	5	speTri2;equCab2;cerSim1;pteAle1;pteVam1	11	calJac3;saiBol1;turTru2;orcOrc1;balAcu1;musFur1;lepWed1;eptFus1;myoLuc2;triMan1;chrAsi1	3
NAIP	0.022548	0.67456		8	29	2	cavPor3;loxAfr3	3	calJac3;saiBol1;capHir1	2
LIPT2	0.0226574	0.675472		7	30	0	NA	0	NA	0
NBAS	0.0226802	0.675472		6	27	1	pteAle1	0	NA	1
NME4	0.0227868	0.67713		8	38	0	NA	0	NA	0
RBP2	0.0229084	0.679224		7	38	0	NA	0	NA	0
ITGA8	0.0232523	0.687884		6	32	1	pteAle1	0	NA	1
RASSF5	0.0233246	0.68849		4	23	0	NA	0	NA	0
PNLIPRP2	0.0237753	0.69655		6	34	1	cavPor3	1	rn6	1
ENOX2	0.0238629	0.69655		7	33	2	pteAle1;pteVam1	0	NA	1
PCDH12	0.0239009	0.69655		7	36	0	NA	0	NA	0
FAM169B	0.0240277	0.69655		7	28	0	NA	0	NA	0
ANKRD7	0.0240427	0.69655		7	32	3	cavPor3;equCab2;cerSim1	6	tarSyr2;micOch1;nanGal1;bosTau8;bisBis1;capHir1	2
ARNT2	0.024045	0.69655		5	31	0	NA	0	NA	0
FADS2	0.0240663	0.69655		5	31	0	NA	0	NA	0
FAM26F	0.0240735	0.69655		7	28	2	equCab2;cerSim1	1	chrAsi1	1
SMC5	0.0240888	0.69655		7	36	0	NA	0	NA	0
FBXL14	0.024122	0.69655		6	29	0	NA	0	NA	0
PRDM2	0.0243382	0.701268		7	35	1	speTri2	0	NA	1
CEP19	0.0245453	0.705445		7	40	0	NA	0	NA	0
WDR91	0.0245894	0.705445		5	37	0	NA	0	NA	0
FCRL4	0.0249587	0.71441		5	30	1	cavPor3	0	NA	1
UBR2	0.0250095	0.71441		6	34	0	NA	0	NA	0
DSCR4	0.025706	0.731952		6	33	6	speTri2;cavPor3;octDeg1;equCab2;cerSim1;pteAle1	19	tarSyr2;micOch1;perManBai1;mm10;rn6;nanGal1;oryCun2;turTru2;orcOrc1;panHod1;bosTau8;bisBis1;capHir1;canFam3;musFur1;eptFus1;myoDav1;myoLuc2;conCri1	4
RIPK4	0.025736	0.731952		7	29	0	NA	0	NA	0
PRKD2	0.0257889	0.731952		4	29	0	NA	0	NA	0
SLC22A6	0.0261662	0.739232		7	38	1	pteAle1	0	NA	1
IL19	0.0262289	0.739232		8	40	0	NA	0	NA	0
STARD3	0.0262699	0.739232		8	34	0	NA	0	NA	0
ADORA2A	0.0264421	0.739232		6	34	0	NA	0	NA	0
SPECC1L_ADORA2A	0.0264421	0.739232		6	34	0	NA	0	NA	0
THBD	0.0264567	0.739232		5	27	0	NA	0	NA	0
FAM86A	0.0265068	0.739232		8	37	0	NA	0	NA	0
CNDP1	0.0265191	0.739232		8	37	0	NA	0	NA	0
NOX3	0.0265462	0.739232		7	38	0	NA	0	NA	0
C12orf10	0.0266736	0.740785		7	38	0	NA	0	NA	0
GP9	0.0267579	0.740785		7	28	0	NA	0	NA	0
SLC46A2	0.0267693	0.740785		7	36	0	NA	0	NA	0
TSNAX	0.0270926	0.748174		6	39	0	NA	0	NA	0
ETV2	0.027419	0.75429		8	32	0	NA	0	NA	0
FBXO10	0.0274277	0.75429		7	36	0	NA	0	NA	0
CYP4A11	0.0276443	0.758676		7	30	3	equCab2;cerSim1;loxAfr3	3	hetGla2;capHir1;felCat8	2
ZNF285	0.027833	0.762279		6	28	4	speTri2;octDeg1;equCab2;loxAfr3	8	hetGla2;orcOrc1;balAcu1;panHod1;bosTau8;bisBis1;capHir1;chrAsi1	4
C14orf159	0.0279666	0.764362		8	36	7	speTri2;cavPor3;octDeg1;equCab2;cerSim1;pteAle1;loxAfr3	12	tarSyr2;hetGla2;oryCun2;ochPri3;turTru2;panHod1;bisBis1;felCat8;canFam3;odoRosDiv1;lepWed1;triMan1	5
TAAR8	0.0282264	0.769878		7	29	2	cerSim1;loxAfr3	6	ponAbe2;rheMac3;macFas5;papAnu2;rhiRox1;tarSyr2	2
SLC7A4	0.0283569	0.771854		6	33	0	NA	0	NA	0
PAX1	0.0286467	0.778146		6	27	0	NA	0	NA	0
TMEM5	0.0294318	0.797843		7	33	0	NA	0	NA	0
NDUFAF2	0.0298854	0.808487		6	33	0	NA	0	NA	0
ACOT12	0.0301701	0.814532		7	37	3	equCab2;pteAle1;loxAfr3	1	tarSyr2	3
KRT37	0.0303374	0.817386		6	39	2	speTri2;cerSim1	4	perManBai1;mm10;nanGal1;turTru2	2
ABCB4	0.0305799	0.820077		7	31	2	cavPor3;equCab2	0	NA	2
SP7	0.0305846	0.820077		8	37	1	loxAfr3	0	NA	1
SH3BP2	0.0306545	0.820077		6	29	0	NA	0	NA	0
ABI3	0.0306842	0.820077		6	36	0	NA	0	NA	0
PAEP	0.0307922	0.821312		5	26	4	cavPor3;cerSim1;pteAle1;pteVam1	10	rhiRox1;perManBai1;mm10;nanGal1;vicPac2;camFer1;panHod1;bosTau8;bisBis1;capHir1	3
LACC1	0.0310624	0.826859		7	36	1	speTri2	0	NA	1
TAS2R20	0.0312347	0.829781		7	33	5	cavPor3;octDeg1;equCab2;cerSim1;loxAfr3	5	hetGla2;oryCun2;balAcu1;bosTau8;triMan1	3
CAND1	0.0313414	0.830953		6	36	0	NA	0	NA	0
PCDHA12	0.0316868	0.838438		7	24	3	speTri2;cavPor3;octDeg1	4	micOch1;perManBai1;mm10;rn6	2
MCTS1	0.0317637	0.838801		7	38	1	pteAle1	0	NA	1
RHAG	0.0319437	0.84188		8	37	1	loxAfr3	0	NA	1
DSG1	0.032046	0.842578		7	37	1	speTri2	0	NA	1
NTRK1	0.0321158	0.842578		6	34	0	NA	0	NA	0
RALY	0.0321604	0.842578		7	38	0	NA	0	NA	0
IL12A	0.0323082	0.843824		8	39	1	loxAfr3	1	micOch1	1
POM121C	0.032335	0.843824		8	32	1	speTri2	0	NA	1
GALK1	0.032586	0.847943		6	37	0	NA	0	NA	0
ZNF454	0.0326619	0.847943		6	39	1	cerSim1	1	tarSyr2	1
RMND5B	0.0326844	0.847943		8	40	2	pteAle1;pteVam1	0	NA	1
POLI	0.0328515	0.849338		6	37	0	NA	0	NA	0
PI4KA	0.032866	0.849338		4	24	0	NA	0	NA	0
DDX55	0.0330115	0.85059		8	38	0	NA	0	NA	0
SLC35D2	0.0330426	0.85059		6	35	1	cerSim1	0	NA	1
SH3KBP1	0.0331949	0.852858		7	33	0	NA	0	NA	0
HIST1H2BM	0.0332762	0.853088		7	31	2	cavPor3;pteVam1	0	NA	2
CTBS	0.0333323	0.853088		7	39	1	loxAfr3	2	balAcu1;chrAsi1	1
NPFF	0.0333971	0.853104		8	39	3	octDeg1;pteAle1;pteVam1	1	canFam3	2
GBF1	0.0336039	0.856737		7	36	1	pteAle1	0	NA	1
EML4	0.0339222	0.863196		8	38	0	NA	0	NA	0
CDKN2B	0.0340583	0.865003		8	34	0	NA	0	NA	0
PI16	0.034139	0.865399		8	34	2	cavPor3;cerSim1	0	NA	2
DBNDD1	0.0343404	0.867202		8	38	0	NA	0	NA	0
ENDOV	0.0343408	0.867202		5	33	0	NA	0	NA	0
DLX4	0.0345157	0.869966		6	32	2	cavPor3;octDeg1	2	micOch1;perManBai1	1
ZNF471	0.034929	0.876908		6	31	2	speTri2;loxAfr3	4	mm10;oryCun2;ochPri3;camFer1	2
HSD17B13	0.0350126	0.876908		6	32	0	NA	0	NA	0
ZNF438	0.0351266	0.876908		7	33	0	NA	0	NA	0
CD3E	0.0351826	0.876908		8	38	0	NA	0	NA	0
INS_IGF2	0.0353374	0.876908		8	31	2	cavPor3;octDeg1	2	saiBol1;bosTau8	1
CHI3L1	0.0354956	0.876908		7	39	1	pteAle1	0	NA	1
CD1A	0.0354987	0.876908		7	23	3	speTri2;cavPor3;loxAfr3	1	bisBis1	3
RNASE6	0.0355793	0.876908		8	36	1	octDeg1	0	NA	1
CXCL16	0.0360054	0.876908		8	40	0	NA	0	NA	0
GML	0.0360512	0.876908		5	22	2	speTri2;octDeg1	0	NA	2
TMEM27	0.0362812	0.876908		7	30	1	pteAle1	0	NA	1
TAF1A	0.0363393	0.876908		5	33	0	NA	0	NA	0
FBXL18	0.0364826	0.876908		7	35	1	loxAfr3	0	NA	1
IRF3	0.0365037	0.876908		7	38	0	NA	0	NA	0
IWS1	0.0365323	0.876908		8	38	0	NA	0	NA	0
TMEM159	0.0365823	0.876908		8	39	0	NA	0	NA	0
TCF19	0.0366757	0.876908		8	38	0	NA	0	NA	0
EHHADH	0.036935	0.876908		8	36	1	speTri2	2	oryCun2;ochPri3	1
CYSLTR1	0.0370381	0.876908		6	31	0	NA	0	NA	0
SLC9B2	0.0371642	0.876908		7	35	1	cerSim1	0	NA	1
IPO13	0.0373054	0.876908		5	36	0	NA	0	NA	0
FAM173A	0.0374122	0.876908		7	27	0	NA	0	NA	0
CXorf30	0.0376477	0.876908		6	29	1	loxAfr3	1	balAcu1	1
SYT16	0.0383723	0.876908		6	35	1	cavPor3	0	NA	1
LRRC52	0.0384901	0.876908		6	38	0	NA	0	NA	0
NUP205	0.0385315	0.876908		6	33	0	NA	0	NA	0
C1orf198	0.0388047	0.876908		5	26	0	NA	0	NA	0
ELAVL2	0.0389173	0.876908		6	35	0	NA	0	NA	0
ACAT2	0.0391919	0.876908		8	38	0	NA	0	NA	0
IL10RB	0.0393015	0.876908		8	37	0	NA	0	NA	0
MREG	0.0393978	0.876908		6	36	0	NA	0	NA	0
BCO1	0.0396247	0.876908		6	37	0	NA	0	NA	0
NPC1L1	0.0396251	0.876908		5	31	1	cerSim1	0	NA	1
NDST4	0.0397623	0.876908		7	29	1	pteAle1	0	NA	1
ULBP2	0.0399957	0.876908		6	28	2	pteAle1;loxAfr3	3	balAcu1;bosTau8;canFam3	2
GDPD4	0.0401135	0.876908		6	32	1	loxAfr3	0	NA	1
A2ML1	0.0405058	0.876908		7	31	3	speTri2;cavPor3;octDeg1	4	mm10;rn6;orcOrc1;odoRosDiv1	2
FAM101A	0.040778	0.876908		6	29	0	NA	0	NA	0
CSF2	0.0407929	0.876908		8	38	0	NA	0	NA	0
TNFRSF17	0.0409784	0.876908		8	40	0	NA	0	NA	0
ESX1	0.0411879	0.876908		6	32	1	speTri2	3	saiBol1;micOch1;odoRosDiv1	1
IL17RA	0.0412061	0.876908		7	26	1	speTri2	0	NA	1
ZNF829	0.0412069	0.876908		5	25	2	speTri2;octDeg1	2	bisBis1;conCri1	2
LILRB3	0.0412796	0.876908		6	23	3	speTri2;octDeg1;pteAle1	4	hetGla2;ochPri3;vicPac2;camFer1	3
HLA_DQB1	0.041281	0.876908		6	29	2	pteAle1;loxAfr3	1	chrAsi1	2
CYP4X1	0.0414169	0.876908		6	38	1	cerSim1	2	orcOrc1;balAcu1	1
RP11_546B8.6	0.0415968	0.876908		7	38	5	speTri2;cavPor3;octDeg1;equCab2;loxAfr3	12	tarSyr2;micOch1;perManBai1;mm10;rn6;hetGla2;ochPri3;musFur1;odoRosDiv1;lepWed1;conCri1;chrAsi1	4
POLR3A	0.0416006	0.876908		7	29	0	NA	0	NA	0
SPINK4	0.0419471	0.876908		7	36	2	equCab2;cerSim1	4	chlSab2;orcOrc1;balAcu1;triMan1	1
LHB	0.0419916	0.876908		7	38	0	NA	0	NA	0
FST	0.0421515	0.876908		8	35	0	NA	0	NA	0
COLQ	0.0422734	0.876908		6	34	1	cavPor3	0	NA	1
PHLDB3	0.0424223	0.876908		6	31	5	speTri2;cavPor3;equCab2;cerSim1;pteAle1	22	rheMac3;chlSab2;rhiRox1;otoGar3;mm10;rn6;nanGal1;oryCun2;turTru2;orcOrc1;balAcu1;panHod1;bosTau8;bisBis1;capHir1;felCat8;canFam3;musFur1;odoRosDiv1;lepWed1;eptFus1;myoDav1	4
FGFBP2	0.0425501	0.876908		8	34	8	speTri2;cavPor3;octDeg1;equCab2;cerSim1;pteAle1;pteVam1;loxAfr3	20	micOch1;perManBai1;mm10;rn6;nanGal1;hetGla2;camFer1;turTru2;orcOrc1;balAcu1;panHod1;bosTau8;bisBis1;felCat8;musFur1;odoRosDiv1;eptFus1;myoDav1;myoLuc2;triMan1	5
SGOL1	0.0425585	0.876908		6	36	0	NA	0	NA	0
CIRBP	0.0425668	0.876908		6	35	0	NA	0	NA	0
ALG1	0.0427307	0.876908		8	38	0	NA	0	NA	0
CHRDL2	0.042851	0.876908		8	38	0	NA	0	NA	0
EYA2	0.0429212	0.876908		6	36	0	NA	0	NA	0
MECP2	0.0432755	0.876908		6	34	0	NA	0	NA	0
SLC2A9	0.0433717	0.876908		6	34	2	pteAle1;loxAfr3	8	rheMac3;macFas5;papAnu2;chlSab2;rhiRox1;nanGal1;vicPac2;camFer1	2
SH3RF2	0.0434452	0.876908		7	34	1	cavPor3	0	NA	1
OTOGL	0.0434857	0.876908		6	30	0	NA	0	NA	0
ABLIM2	0.0438031	0.876908		7	28	1	loxAfr3	0	NA	1
E2F6	0.0438131	0.876908		8	38	0	NA	0	NA	0
CAPN13	0.0438333	0.876908		8	35	2	cerSim1;loxAfr3	2	orcOrc1;balAcu1	2
SERHL2	0.0438571	0.876908		5	27	2	cavPor3;octDeg1	1	nanGal1	1
PCDHGA1	0.044215	0.876908		8	34	2	cerSim1;loxAfr3	1	triMan1	2
SAV1	0.044331	0.876908		6	39	0	NA	0	NA	0
CA13	0.0443585	0.876908		6	39	0	NA	0	NA	0
JPH1	0.0443612	0.876908		5	34	1	equCab2	0	NA	1
DUSP19	0.0444384	0.876908		7	40	0	NA	0	NA	0
NUDT16	0.044457	0.876908		6	24	0	NA	0	NA	0
MRPL36	0.0447818	0.876908		6	32	0	NA	0	NA	0
PSMG2	0.0449953	0.876908		8	35	0	NA	0	NA	0
DUSP5	0.0450153	0.876908		6	22	0	NA	0	NA	0
KRT73	0.0450624	0.876908		8	39	1	cerSim1	0	NA	1
AL109659.1	0.0451617	0.876908		7	36	6	speTri2;octDeg1;equCab2;cerSim1;pteAle1;pteVam1	20	calJac3;saiBol1;micOch1;perManBai1;mm10;rn6;hetGla2;ochPri3;orcOrc1;balAcu1;panHod1;bosTau8;bisBis1;capHir1;felCat8;canFam3;musFur1;odoRosDiv1;lepWed1;conCri1	4
ADCK2	0.0451855	0.876908		6	39	0	NA	0	NA	0
RUFY4	0.0453093	0.876908		6	35	1	cavPor3	0	NA	1
ZFYVE28	0.0454109	0.876908		5	22	0	NA	0	NA	0
IFI44L	0.0455043	0.876908		6	32	3	cavPor3;octDeg1;pteAle1	5	saiBol1;otoGar3;nanGal1;odoRosDiv1;lepWed1	2
RP11_307N16.6	0.0456509	0.876908		4	26	0	NA	0	NA	0
C9orf89	0.0457619	0.876908		7	36	0	NA	0	NA	0
WDFY3	0.0458669	0.876908		6	30	1	cavPor3	0	NA	1
AKAP1	0.0458821	0.876908		7	34	1	loxAfr3	4	canFam3;eptFus1;myoDav1;myoLuc2	1
UBE3C	0.0463332	0.876908		6	33	0	NA	0	NA	0
SLFN14	0.0464926	0.876908		6	37	2	cavPor3;octDeg1	1	felCat8	1
XPO4	0.0466604	0.876908		6	38	0	NA	0	NA	0
GLDC	0.0468	0.876908		8	35	0	NA	0	NA	0
CD2	0.0470161	0.876908		8	38	0	NA	0	NA	0
C20orf195	0.0473075	0.876908		8	37	0	NA	0	NA	0
FAM216B	0.0473158	0.876908		7	39	2	speTri2;cavPor3	3	rheMac3;macFas5;papAnu2	2
RPL10L	0.0476203	0.876908		7	36	1	cerSim1	0	NA	1
LAMP2	0.0477776	0.876908		7	36	1	cerSim1	0	NA	1
ANKRD34C	0.0478977	0.876908		6	36	0	NA	0	NA	0
GPT	0.0479448	0.876908		5	28	1	pteAle1	0	NA	1
ZFP37	0.0479794	0.876908		6	36	0	NA	1	chrAsi1	0
CHIA	0.0480516	0.876908		7	38	4	cavPor3;octDeg1;equCab2;cerSim1	11	rheMac3;macFas5;papAnu2;rhiRox1;perManBai1;rn6;hetGla2;oryCun2;ochPri3;musFur1;triMan1	2
PRR32	0.0480997	0.876908		6	31	3	cavPor3;octDeg1;pteAle1	1	hetGla2	2
SETDB1	0.0481633	0.876908		6	36	2	speTri2;cerSim1	4	mm10;eptFus1;myoDav1;myoLuc2	2
WBSCR16	0.0482402	0.876908		5	24	1	equCab2	0	NA	1
BBOX1	0.0485383	0.876908		8	35	0	NA	0	NA	0
SHISA4	0.0487972	0.876908		8	34	1	pteAle1	0	NA	1
IL22	0.0494445	0.876908		8	39	0	NA	0	NA	0
RAPGEF4	0.0494577	0.876908		7	36	0	NA	0	NA	0
C8A	0.0495734	0.876908		7	36	1	octDeg1	0	NA	1
C19orf60	0.0496499	0.876908		7	35	1	cavPor3	0	NA	1
DUSP27	0.0500932	0.876908		5	35	1	pteAle1	0	NA	1
SERPINA6	0.0501737	0.876908		7	38	0	NA	0	NA	0
CCBL2	0.0501901	0.876908		7	34	0	NA	0	NA	0
HS1BP3	0.0501938	0.876908		7	37	1	loxAfr3	1	balAcu1	1
SERPINB13	0.0503234	0.876908		6	35	0	NA	0	NA	0
PHACTR3	0.0503315	0.876908		6	31	0	NA	0	NA	0
HIST2H2AC	0.0504843	0.876908		8	37	1	cavPor3	0	NA	1
ACAD11	0.0506849	0.876908		8	30	1	pteVam1	0	NA	1
HHLA1	0.0508355	0.876908		6	34	2	cavPor3;pteAle1	1	myoDav1	2
URAD	0.0514851	0.876908		6	30	2	cavPor3;loxAfr3	0	NA	2
SLCO3A1	0.0517421	0.876908		5	28	0	NA	0	NA	0
KERA	0.0517994	0.876908		8	40	0	NA	0	NA	0
AKTIP	0.0517994	0.876908		8	40	0	NA	0	NA	0
CIAO1	0.0517994	0.876908		8	40	0	NA	0	NA	0
TERF2IP	0.0520918	0.876908		7	30	0	NA	0	NA	0
MAPK13	0.0521586	0.876908		7	38	0	NA	0	NA	0
SYNE4	0.0523147	0.876908		8	39	1	loxAfr3	3	bisBis1;conCri1;chrAsi1	1
HESX1	0.052342	0.876908		8	36	0	NA	0	NA	0
ARHGAP20	0.0523534	0.876908		5	32	1	pteAle1	0	NA	1
TET3	0.0524744	0.876908		6	35	0	NA	0	NA	0
DPPA5	0.0526151	0.876908		5	32	1	cerSim1	2	panHod1;bosTau8	1
FAM60A	0.0532684	0.876908		7	33	1	speTri2	0	NA	1
PLEKHH1	0.0536856	0.876908		7	39	0	NA	0	NA	0
NPY1R	0.0537344	0.876908		8	39	0	NA	0	NA	0
MFSD4	0.0537384	0.876908		8	39	0	NA	0	NA	0
STON1_GTF2A1L	0.0537697	0.876908		6	38	0	NA	0	NA	0
FAM181A	0.053792	0.876908		8	39	0	NA	0	NA	0
COX11	0.0538077	0.876908		7	36	1	octDeg1	0	NA	1
C8orf48	0.054172	0.876908		6	37	0	NA	0	NA	0
STIM2	0.0541809	0.876908		7	35	0	NA	0	NA	0
KRT20	0.0544742	0.876908		5	35	2	pteAle1;pteVam1	1	balAcu1	1
GCM2	0.054612	0.876908		7	36	0	NA	0	NA	0
PACS1	0.054754	0.876908		7	32	0	NA	0	NA	0
IL27	0.0547967	0.876908		7	33	0	NA	0	NA	0
NAP1L3	0.0548044	0.876908		6	33	2	speTri2;octDeg1	6	calJac3;saiBol1;perManBai1;ochPri3;panHod1;capHir1	2
SMO	0.0548047	0.876908		8	37	0	NA	0	NA	0
C12orf76	0.0548818	0.876908		7	37	1	loxAfr3	1	micOch1	1
ZNF615	0.0553344	0.876908		6	25	4	speTri2;cavPor3;pteVam1;loxAfr3	3	mm10;oryCun2;turTru2	4
POC1B_GALNT4	0.0553582	0.876908		7	40	0	NA	0	NA	0
SPTSSB	0.0554559	0.876908		7	39	0	NA	0	NA	0
CYP26B1	0.0554565	0.876908		7	39	0	NA	0	NA	0
NPPB	0.055583	0.876908		8	38	0	NA	0	NA	0
SAMSN1	0.0556021	0.876908		8	38	0	NA	0	NA	0
NDUFA11	0.0556328	0.876908		7	37	0	NA	0	NA	0
ANKRD29	0.0557072	0.876908		8	32	0	NA	0	NA	0
KCNJ8	0.0557511	0.876908		8	38	0	NA	0	NA	0
SRA1	0.0557836	0.876908		7	37	0	NA	0	NA	0
SERPINB3	0.0558439	0.876908		5	23	1	pteAle1	0	NA	1
ACADL	0.0563329	0.876908		6	36	1	equCab2	3	ponAbe2;calJac3;saiBol1	1
2010-09-01	0.0563602	0.876908		7	36	0	NA	0	NA	0
YIF1A	0.0564482	0.876908		8	38	0	NA	0	NA	0
NEK3	0.0564561	0.876908		7	29	0	NA	0	NA	0
HDDC2	0.0566417	0.876908		6	39	0	NA	0	NA	0
TSPAN5	0.0568189	0.876908		8	37	0	NA	0	NA	0
BTBD9	0.0571787	0.876908		6	34	0	NA	0	NA	0
HLA_B	0.0572648	0.876908		6	28	2	cerSim1;loxAfr3	6	macFas5;balAcu1;panHod1;canFam3;musFur1;conCri1	2
ZC3H15	0.0573243	0.876908		8	39	0	NA	0	NA	0
IFNA13	0.057344	0.876908		4	26	1	equCab2	4	perManBai1;ochPri3;orcOrc1;balAcu1	1
PEF1	0.0574443	0.876908		7	38	0	NA	0	NA	0
XPA	0.0575455	0.876908		6	34	0	NA	0	NA	0
ACAD10	0.0576255	0.876908		7	30	2	pteAle1;pteVam1	5	felCat8;canFam3;musFur1;odoRosDiv1;lepWed1	1
MDM4	0.0577318	0.876908		7	38	0	NA	0	NA	0
IRF9	0.0577702	0.876908		8	39	1	cerSim1	2	mm10;rn6	1
SNX8	0.0578449	0.876908		8	30	0	NA	0	NA	0
ADAM17	0.0580036	0.876908		8	37	0	NA	0	NA	0
IQCJ	0.058043	0.876908		6	34	1	speTri2	0	NA	1
TMX4	0.058215	0.876908		8	37	0	NA	0	NA	0
CFC1B	0.058279	0.876908		7	33	0	NA	0	NA	0
APOL3	0.0582944	0.876908		4	30	1	cerSim1	2	calJac3;nanGal1	1
PAFAH1B2	0.0584017	0.876908		8	37	0	NA	0	NA	0
AMPD1	0.0584502	0.876908		7	36	0	NA	0	NA	0
HCAR2	0.0585235	0.876908		8	37	1	loxAfr3	1	triMan1	1
SERPINA4	0.0587683	0.876908		7	36	2	equCab2;cerSim1	7	mm10;oryCun2;orcOrc1;balAcu1;bosTau8;bisBis1;capHir1	1
INO80D	0.0588089	0.876908		5	36	0	NA	0	NA	0
CYB5D1	0.0591495	0.876908		8	37	0	NA	0	NA	0
SRSF11	0.0591504	0.876908		7	37	0	NA	0	NA	0
REXO4	0.0591532	0.876908		6	33	0	NA	0	NA	0
ERN1	0.0591719	0.876908		6	35	1	pteAle1	0	NA	1
CCIN	0.059296	0.876908		7	39	2	equCab2;cerSim1	0	NA	1
CPD	0.0593366	0.876908		6	36	0	NA	0	NA	0
STAC2	0.0593759	0.876908		7	35	0	NA	1	panHod1	0
NNAT	0.0594611	0.876908		8	39	0	NA	0	NA	0
GHDC	0.059464	0.876908		8	39	0	NA	0	NA	0
TAGAP	0.0595274	0.876908		7	37	0	NA	0	NA	0
ZC3H12C	0.0595571	0.876908		6	33	0	NA	0	NA	0
PHKG2	0.0597188	0.876908		7	37	0	NA	0	NA	0
QRSL1	0.059722	0.876908		7	37	0	NA	0	NA	0
CATSPER1	0.0599987	0.876908		6	33	2	cavPor3;cerSim1	0	NA	2
RFK	0.0602908	0.876908		7	36	1	cerSim1	0	NA	1
CLEC4E	0.0604933	0.876908		7	38	0	NA	0	NA	0
RXRA	0.060495	0.876908		6	28	0	NA	0	NA	0
GNL3	0.0606854	0.876908		8	37	0	NA	0	NA	0
FBXO22	0.0606867	0.876908		7	34	0	NA	0	NA	0
ALDH1L1	0.060873	0.876908		4	29	0	NA	1	rn6	0
SBNO2	0.0609153	0.876908		5	25	0	NA	0	NA	0
RP4_734P14.4	0.061224	0.876908		8	34	5	speTri2;cavPor3;octDeg1;equCab2;cerSim1	10	tarSyr2;mm10;rn6;nanGal1;hetGla2;oryCun2;ochPri3;turTru2;orcOrc1;capHir1	3
FRMD4B	0.0612633	0.876908		7	34	2	cavPor3;octDeg1	0	NA	1
ANK3	0.0612637	0.876908		6	27	1	cavPor3	0	NA	1
RELT	0.0614043	0.876908		7	34	0	NA	0	NA	0
SMTN	0.0614089	0.876908		6	32	0	NA	0	NA	0
C20orf202	0.061596	0.876908		5	38	0	NA	0	NA	0
GPSM2	0.0616142	0.876908		8	35	0	NA	0	NA	0
TEX19	0.0616435	0.876908		7	28	2	cerSim1;pteAle1	1	camFer1	2
TNFSF12_TNFSF13	0.0616662	0.876908		7	36	0	NA	0	NA	0
LCE5A	0.0618955	0.876908		6	38	2	speTri2;loxAfr3	5	turTru2;orcOrc1;balAcu1;felCat8;triMan1	2
TNFSF8	0.0619042	0.876908		7	38	0	NA	0	NA	0
RHBDD1	0.0619628	0.876908		7	36	0	NA	0	NA	0
METTL17	0.0619631	0.876908		7	36	1	cavPor3	0	NA	1
PGM2	0.061975	0.876908		7	36	0	NA	0	NA	0
GBX2	0.0619758	0.876908		7	25	0	NA	0	NA	0
SAMD12	0.0620523	0.876908		7	36	0	NA	0	NA	0
SNAP25	0.0622063	0.876908		7	36	0	NA	0	NA	0
COL5A3	0.0622196	0.876908		5	29	0	NA	1	panPan1	0
ZNF605	0.0622289	0.876908		8	36	2	cavPor3;octDeg1	3	micOch1;perManBai1;nanGal1	1
LAIR2	0.0624863	0.876908		6	25	0	NA	0	NA	0
KRI1	0.0626276	0.876908		8	34	0	NA	0	NA	0
BTNL2	0.0628972	0.876908		8	30	4	cerSim1;pteAle1;pteVam1;loxAfr3	4	chlSab2;calJac3;tarSyr2;myoDav1	3
EIF4G1	0.0629079	0.876908		8	35	0	NA	0	NA	0
TXK	0.062918	0.876908		7	35	1	cavPor3	0	NA	1
PACSIN1	0.0629966	0.876908		8	36	0	NA	0	NA	0
PPP1R14A	0.0630559	0.876908		5	25	0	NA	0	NA	0
ASGR1	0.0630965	0.876908		8	36	0	NA	0	NA	0
CLEC4D	0.0632149	0.876908		8	33	1	octDeg1	2	turTru2;orcOrc1	1
HCAR1	0.0632326	0.876908		7	38	0	NA	0	NA	0
GPR101	0.0632429	0.876908		6	34	0	NA	0	NA	0
GTF2H5	0.0634215	0.876908		7	38	0	NA	0	NA	0
CPNE5	0.0635134	0.876908		7	35	0	NA	0	NA	0
RNF220	0.0638374	0.876908		6	31	1	equCab2	0	NA	1
BEX4	0.0642009	0.876908		6	35	2	octDeg1;loxAfr3	1	hetGla2	2
AGO3	0.0642573	0.876908		7	34	0	NA	0	NA	0
DDX3X	0.064313	0.876908		7	35	0	NA	0	NA	0
SIAE	0.0643462	0.876908		7	37	2	equCab2;cerSim1	5	micOch1;perManBai1;mm10;rn6;nanGal1	1
SUCLA2	0.0645083	0.876908		7	34	0	NA	0	NA	0
SLCO2A1	0.0645559	0.876908		7	35	0	NA	0	NA	0
ANKRD17	0.0646296	0.876908		7	35	0	NA	0	NA	0
LSM7	0.0647162	0.876908		6	34	0	NA	0	NA	0
AHSG	0.0648992	0.876908		7	39	0	NA	0	NA	0
DCLK2	0.0650087	0.876908		8	34	0	NA	0	NA	0
TRBV25_1	0.0650733	0.876908		5	32	1	equCab2	2	panHod1;capHir1	1
EHD4	0.0651561	0.876908		8	38	0	NA	0	NA	0
RHOB	0.0656775	0.876908		7	34	0	NA	0	NA	0
ACMSD	0.0660157	0.876908		8	36	1	pteAle1	0	NA	1
CRTC1	0.0662644	0.876908		6	30	0	NA	0	NA	0
STAMBP	0.0663283	0.876908		7	37	1	equCab2	0	NA	1
HLA_DPB1	0.0664638	0.876908		6	29	2	equCab2;cerSim1	5	turTru2;bosTau8;canFam3;musFur1;odoRosDiv1	1
CLCN1	0.0670281	0.876908		7	34	0	NA	0	NA	0
GAS8	0.0670354	0.876908		7	35	1	pteVam1	1	balAcu1	1
AOX1	0.067201	0.876908		5	29	1	pteAle1	2	felCat8;canFam3	1
PPT2_EGFL8	0.0672092	0.876908		7	37	0	NA	0	NA	0
EFHC1	0.0672266	0.876908		5	36	0	NA	0	NA	0
S100B	0.0672574	0.876908		8	38	1	speTri2	1	otoGar3	1
CREBBP	0.0673769	0.876908		6	28	0	NA	0	NA	0
THAP7	0.0674472	0.876908		7	36	1	speTri2	1	bisBis1	1
ZNF253	0.0674503	0.876908		6	22	4	speTri2;equCab2;cerSim1;pteAle1	3	panPan1;rhiRox1;bisBis1	3
IZUMO1	0.0675629	0.876908		8	36	0	NA	0	NA	0
ESD	0.0675768	0.876908		7	35	0	NA	0	NA	0
AJUBA	0.0676278	0.876908		7	32	0	NA	0	NA	0
NLRP6	0.0677701	0.876908		6	29	2	cavPor3;loxAfr3	3	hetGla2;turTru2;orcOrc1	2
PNPO	0.0678816	0.876908		6	39	0	NA	0	NA	0
ARRDC1	0.0678854	0.876908		7	31	0	NA	0	NA	0
PREP	0.0678998	0.876908		7	35	0	NA	0	NA	0
TCEAL3	0.0679775	0.876908		8	35	2	octDeg1;pteAle1	2	bosTau8;capHir1	2
GTF2H2	0.0679886	0.876908		7	34	1	cavPor3	0	NA	1
KIF17	0.0680728	0.876908		7	36	1	speTri2	0	NA	1
FAM221A	0.0682665	0.876908		7	36	0	NA	0	NA	0
PIK3CG	0.0682765	0.876908		6	37	0	NA	0	NA	0
PLA2G16	0.0684533	0.876908		7	36	0	NA	0	NA	0
C1RL	0.0684783	0.876908		8	32	0	NA	0	NA	0
MRPL39	0.0688517	0.876908		7	36	0	NA	0	NA	0
MUM1	0.0691078	0.876908		7	31	3	speTri2;equCab2;cerSim1	8	mm10;rn6;turTru2;orcOrc1;balAcu1;panHod1;capHir1;eptFus1	2
IFNGR2	0.0691233	0.876908		8	35	0	NA	0	NA	0
HEG1	0.069275	0.876908		6	36	0	NA	1	canFam3	0
BACE2	0.0699521	0.876908		6	34	0	NA	0	NA	0
LCN2	0.070155	0.876908		7	39	0	NA	0	NA	0
ZNF181	0.0702922	0.876908		5	32	0	NA	1	rn6	0
GPR1	0.070324	0.876908		8	40	1	cavPor3	0	NA	1
RILPL1	0.0711502	0.876908		6	31	0	NA	0	NA	0
SCML4	0.0713375	0.876908		7	39	1	cavPor3	0	NA	1
ZC3H18	0.0714991	0.876908		6	31	1	cerSim1	0	NA	1
METTL2A	0.0719547	0.876908		8	36	0	NA	0	NA	0
LCE1A	0.0719567	0.876908		7	26	2	octDeg1;cerSim1	2	otoGar3;musFur1	2
P2RX4	0.072134	0.876908		8	39	0	NA	0	NA	0
AGBL1	0.0723308	0.876908		7	30	1	pteAle1	0	NA	1
LCE1D	0.0724602	0.876908		4	22	0	NA	0	NA	0
ULBP1	0.0724906	0.876908		7	23	1	octDeg1	1	rhiRox1	1
SYPL1	0.0724933	0.876908		7	40	0	NA	0	NA	0
CCL23	0.0725877	0.876908		6	28	0	NA	0	NA	0
NANP	0.0726983	0.876908		7	36	0	NA	0	NA	0
AFF4	0.072737	0.876908		7	36	0	NA	0	NA	0
PNMA1	0.0728217	0.876908		8	39	0	NA	0	NA	0
MTAP	0.0730424	0.876908		7	39	1	equCab2	0	NA	1
LCE1F	0.0731922	0.876908		6	34	2	speTri2;loxAfr3	3	otoGar3;musFur1;lepWed1	2
FANCF	0.0732357	0.876908		6	33	1	cavPor3	0	NA	1
CPNE9	0.073236	0.876908		7	35	0	NA	0	NA	0
CCDC158	0.0733928	0.876908		8	33	0	NA	0	NA	0
CT62	0.0738549	0.876908		7	37	7	speTri2;cavPor3;octDeg1;equCab2;cerSim1;pteAle1;pteVam1	19	saiBol1;otoGar3;micOch1;perManBai1;mm10;rn6;nanGal1;hetGla2;oryCun2;ochPri3;camFer1;orcOrc1;balAcu1;panHod1;felCat8;canFam3;musFur1;odoRosDiv1;conCri1	4
CATSPER4	0.0739042	0.876908		6	36	2	cavPor3;octDeg1	1	bisBis1	1
ABCF3	0.0744317	0.876908		8	40	0	NA	0	NA	0
PRADC1	0.0744317	0.876908		8	40	0	NA	0	NA	0
CADM3	0.0744317	0.876908		8	40	0	NA	0	NA	0
SUMF2	0.0744627	0.876908		8	35	2	pteAle1;pteVam1	0	NA	1
ABAT	0.0744941	0.876908		8	38	0	NA	0	NA	0
UBE2B	0.0745119	0.876908		7	39	0	NA	0	NA	0
GRB7	0.074524	0.876908		8	38	0	NA	0	NA	0
C11orf58	0.0745303	0.876908		6	37	0	NA	0	NA	0
TMEM52B	0.0746292	0.876908		8	38	0	NA	0	NA	0
FAF1	0.0746716	0.876908		7	32	0	NA	0	NA	0
SCNN1B	0.0746828	0.876908		7	31	0	NA	0	NA	0
POPDC3	0.074791	0.876908		7	39	0	NA	0	NA	0
GIPC3	0.0748143	0.876908		6	21	0	NA	0	NA	0
ZNF430	0.074861	0.876908		4	23	2	cerSim1;pteAle1	4	micOch1;rn6;oryCun2;balAcu1	2
PTMA	0.0748613	0.876908		6	35	1	cavPor3	1	ochPri3	1
RWDD2A	0.0750589	0.876908		8	38	0	NA	0	NA	0
PMPCB	0.075135	0.876908		8	38	0	NA	0	NA	0
NFKB2	0.075156	0.876908		7	31	0	NA	0	NA	0
ADPRHL2	0.0752476	0.876908		8	40	0	NA	0	NA	0
MFSD2B	0.0752834	0.876908		6	32	0	NA	0	NA	0
LILRB1	0.0754321	0.876908		7	23	5	cavPor3;octDeg1;cerSim1;pteAle1;pteVam1	5	micOch1;rn6;ochPri3;musFur1;odoRosDiv1	3
RRP36	0.0754652	0.876908		8	37	0	NA	0	NA	0
ZADH2	0.0757563	0.876908		7	40	0	NA	0	NA	0
EFNA1	0.0757563	0.876908		7	40	0	NA	0	NA	0
GTF2B	0.0757563	0.876908		7	40	0	NA	0	NA	0
AGGF1	0.076307	0.876908		6	37	1	cavPor3	1	rn6	1
ERP29	0.0764046	0.876908		8	39	1	octDeg1	0	NA	1
LRFN5	0.0765983	0.876908		6	26	0	NA	0	NA	0
TOMM34	0.0767057	0.876908		8	39	0	NA	0	NA	0
NDUFA4	0.0767057	0.876908		8	39	0	NA	0	NA	0
GPS2	0.0767092	0.876908		8	39	0	NA	0	NA	0
MS4A5	0.0767593	0.876908		8	34	0	NA	0	NA	0
CD200R1L	0.0770997	0.876908		7	32	2	speTri2;loxAfr3	2	conCri1;triMan1	2
NT5C1A	0.0771597	0.876908		7	38	0	NA	0	NA	0
UBASH3B	0.0771724	0.876908		8	36	0	NA	0	NA	0
RPL27	0.0771796	0.876908		7	38	1	octDeg1	0	NA	1
C7orf55_LUC7L2	0.0771815	0.876908		7	38	1	octDeg1	0	NA	1
FYN	0.0771861	0.876908		6	38	0	NA	0	NA	0
KCTD21	0.0772391	0.876908		7	38	0	NA	0	NA	0
APEX1	0.0774777	0.876908		8	37	0	NA	0	NA	0
GSK3A	0.0775974	0.876908		8	39	0	NA	0	NA	0
TMX2_CTNND1	0.0777209	0.876908		8	39	0	NA	0	NA	0
IFNLR1	0.0778145	0.876908		8	40	0	NA	0	NA	0
NSUN6	0.0778191	0.876908		7	30	0	NA	0	NA	0
TNFSF12	0.077824	0.876908		7	26	0	NA	0	NA	0
AC069547.1	0.0779637	0.876908		8	38	8	speTri2;cavPor3;octDeg1;equCab2;cerSim1;pteAle1;pteVam1;loxAfr3	27	rhiRox1;calJac3;saiBol1;tarSyr2;otoGar3;perManBai1;rn6;nanGal1;hetGla2;oryCun2;vicPac2;camFer1;orcOrc1;balAcu1;panHod1;bosTau8;bisBis1;capHir1;felCat8;musFur1;odoRosDiv1;lepWed1;eptFus1;myoDav1;myoLuc2;conCri1;chrAsi1	5
ZFP92	0.0780409	0.876908		6	29	2	equCab2;cerSim1	6	ochPri3;vicPac2;camFer1;orcOrc1;bosTau8;felCat8	1
FIP1L1	0.0780974	0.876908		7	39	0	NA	0	NA	0
VPS45	0.0781368	0.876908		7	38	1	octDeg1	0	NA	1
CGRRF1	0.0783553	0.876908		7	39	0	NA	0	NA	0
ATR	0.0784888	0.876908		5	34	0	NA	0	NA	0
SMARCA5	0.078554	0.876908		7	35	1	cavPor3	0	NA	1
FN1	0.0788429	0.876908		7	37	0	NA	0	NA	0
HBG2	0.0789222	0.876908		4	25	0	NA	0	NA	0
TPP1	0.0789269	0.876908		8	39	0	NA	0	NA	0
EFCAB10	0.079056	0.876908		8	38	0	NA	0	NA	0
FBXW4	0.0790624	0.876908		4	26	0	NA	0	NA	0
ASF1B	0.0791165	0.876908		8	38	0	NA	0	NA	0
TPM1	0.0792354	0.876908		8	38	0	NA	0	NA	0
SYNGR2	0.0793638	0.876908		8	38	0	NA	0	NA	0
PNMA2	0.079431	0.876908		7	39	2	cavPor3;octDeg1	2	ochPri3;conCri1	1
LIN7A	0.0796941	0.876908		7	37	0	NA	0	NA	0
ACSM2A	0.0797324	0.876908		7	30	2	cerSim1;pteAle1	1	myoDav1	2
PKN2	0.079844	0.876908		8	36	0	NA	0	NA	0
CSE1L	0.0798503	0.876908		7	37	0	NA	0	NA	0
SELE	0.0800547	0.876908		8	36	0	NA	0	NA	0
GPR116	0.0801241	0.876908		7	36	0	NA	0	NA	0
NUDT17	0.0804934	0.876908		8	35	3	speTri2;cavPor3;cerSim1	2	panPan1;triMan1	3
SMPD1	0.0805161	0.876908		7	38	0	NA	0	NA	0
DHX15	0.0805257	0.876908		7	38	1	equCab2	0	NA	1
RBM12	0.080568	0.876908		7	37	1	speTri2	1	chrAsi1	1
STARD10	0.0806192	0.876908		7	38	0	NA	0	NA	0
HENMT1	0.0806269	0.876908		6	37	0	NA	0	NA	0
ADSL	0.0806353	0.876908		7	38	0	NA	0	NA	0
RAB18	0.0806376	0.876908		7	38	0	NA	0	NA	0
GALNT7	0.0808072	0.876908		7	38	0	NA	0	NA	0
TBC1D10C	0.0808462	0.876908		7	35	0	NA	0	NA	0
SERINC3	0.0808851	0.876908		7	38	0	NA	0	NA	0
PHB	0.0811689	0.876908		7	36	0	NA	0	NA	0
DMKN	0.0812448	0.876908		8	35	0	NA	0	NA	0
GBP4	0.081437	0.876908		6	29	4	octDeg1;equCab2;pteAle1;loxAfr3	5	panHod1;canFam3;odoRosDiv1;lepWed1;myoLuc2	4
RPS3	0.0814457	0.876908		7	36	0	NA	0	NA	0
MTERF3	0.0814707	0.876908		8	39	0	NA	0	NA	0
SERPINC1	0.0814816	0.876908		8	37	0	NA	0	NA	0
HIAT1	0.0814894	0.876908		8	37	0	NA	0	NA	0
WDFY1	0.0818195	0.876908		8	37	0	NA	0	NA	0
PHC1	0.0819805	0.876908		8	36	1	pteAle1	0	NA	1
EPS15	0.0820556	0.876908		7	33	0	NA	0	NA	0
THAP10	0.0821194	0.876908		7	37	5	speTri2;cavPor3;equCab2;cerSim1;loxAfr3	14	otoGar3;perManBai1;mm10;rn6;nanGal1;panHod1;bosTau8;bisBis1;capHir1;myoDav1;myoLuc2;conCri1;triMan1;chrAsi1	4
TNNT3	0.0821527	0.876908		6	29	0	NA	0	NA	0
GAL3ST3	0.0822843	0.876908		6	24	0	NA	0	NA	0
RPS19BP1	0.0823899	0.876908		8	37	0	NA	0	NA	0
SMC6	0.0824873	0.876908		7	38	0	NA	0	NA	0
MAGEA9B	0.0825662	0.876908		5	22	2	cavPor3;cerSim1	5	saiBol1;tarSyr2;mm10;rn6;nanGal1	2
HSD11B2	0.0826177	0.876908		7	23	0	NA	0	NA	0
AC024592.12	0.0829137	0.876908		7	37	0	NA	0	NA	0
SEC14L6	0.0829448	0.876908		8	31	6	cavPor3;equCab2;cerSim1;pteAle1;pteVam1;loxAfr3	14	chlSab2;rhiRox1;tarSyr2;otoGar3;turTru2;orcOrc1;canFam3;musFur1;odoRosDiv1;lepWed1;eptFus1;myoDav1;myoLuc2;triMan1	4
FAM184A	0.0830351	0.876908		8	35	0	NA	0	NA	0
CDC40	0.0831739	0.876908		8	37	0	NA	0	NA	0
GPR151	0.083298	0.876908		8	40	0	NA	0	NA	0
CAMKK1	0.0833183	0.876908		8	38	0	NA	0	NA	0
SH3GL3	0.083352	0.876908		5	31	0	NA	0	NA	0
BOLL	0.0834727	0.876908		6	37	1	equCab2	0	NA	1
SHBG	0.0834752	0.876908		8	40	4	equCab2;cerSim1;pteAle1;pteVam1	2	nanGal1;chrAsi1	2
GLOD5	0.0835146	0.876908		7	36	2	cerSim1;pteAle1	2	vicPac2;balAcu1	2
MEGF11	0.0835999	0.876908		7	35	0	NA	0	NA	0
SGCB	0.0837141	0.876908		7	37	0	NA	0	NA	0
ZCCHC4	0.0837391	0.876908		7	36	0	NA	0	NA	0
ARFGEF2	0.0838152	0.876908		8	36	0	NA	0	NA	0
NPB	0.0839422	0.876908		5	21	1	cavPor3	0	NA	1
PIGM	0.0839663	0.876908		7	37	0	NA	0	NA	0
PPP5C	0.0840329	0.876908		7	37	0	NA	0	NA	0
PBRM1	0.0842164	0.876908		7	33	1	pteAle1	0	NA	1
SOAT2	0.0843069	0.876908		7	37	1	cavPor3	0	NA	1
ATG16L1	0.0843434	0.876908		8	36	0	NA	0	NA	0
ADCK1	0.0843727	0.876908		8	36	0	NA	0	NA	0
DDX28	0.0844247	0.876908		8	38	1	cerSim1	1	panPan1	1
CEP57L1	0.0844486	0.876908		8	36	0	NA	0	NA	0
UBXN2B	0.0844533	0.876908		8	36	0	NA	0	NA	0
PLEKHA8	0.0844823	0.876908		8	36	0	NA	0	NA	0
CMTM8	0.0846647	0.876908		5	26	0	NA	0	NA	0
POU4F3	0.0847493	0.876908		8	36	0	NA	0	NA	0
AGAP3	0.0849915	0.876908		7	36	0	NA	1	felCat8	0
AFAP1L1	0.0851648	0.876908		7	37	0	NA	0	NA	0
SPOCK3	0.0851657	0.876908		5	30	0	NA	0	NA	0
PPP1R12C	0.0852078	0.876908		7	30	2	octDeg1;loxAfr3	3	panHod1;canFam3;conCri1	2
TMEM139	0.0854103	0.876908		8	40	1	octDeg1	0	NA	1
CTC_487M23.8	0.0855212	0.876908		8	39	0	NA	0	NA	0
TPGS1	0.0855566	0.876908		5	23	0	NA	0	NA	0
C6orf62	0.0856088	0.876908		8	34	0	NA	0	NA	0
ARMCX1	0.0856216	0.876908		7	36	0	NA	0	NA	0
SPRR4	0.0856799	0.876908		8	37	2	cavPor3;cerSim1	2	canFam3;lepWed1	2
STT3B	0.0858777	0.876908		6	37	0	NA	0	NA	0
GNAQ	0.0859794	0.876908		7	36	0	NA	0	NA	0
PANK3	0.0859818	0.876908		7	36	0	NA	0	NA	0
DIRAS3	0.0861181	0.876908		4	28	1	cavPor3	1	conCri1	1
DPP10	0.0861366	0.876908		7	27	0	NA	0	NA	0
SERPINB4	0.0862559	0.876908		6	29	2	pteAle1;pteVam1	1	otoGar3	1
TTC8	0.0862762	0.876908		7	36	0	NA	0	NA	0
ADAMTS20	0.086281	0.876908		6	33	0	NA	0	NA	0
MGAT1	0.0870483	0.876908		7	37	1	equCab2	0	NA	1
RP11_248J23.6	0.0871633	0.876908		7	36	0	NA	0	NA	0
TAF12	0.0873812	0.876908		8	35	0	NA	0	NA	0
ARRB2	0.0874621	0.876908		7	37	0	NA	0	NA	0
GON4L	0.0881341	0.876908		5	30	2	cavPor3;pteAle1	4	mm10;rn6;nanGal1;hetGla2	2
BTG2	0.0881342	0.876908		8	35	0	NA	0	NA	0
UBQLN1	0.0882155	0.876908		8	35	0	NA	0	NA	0
HYAL3	0.0882857	0.876908		8	37	0	NA	3	otoGar3;nanGal1;ochPri3	0
SYT1	0.0883134	0.876908		7	35	0	NA	0	NA	0
TSPAN18	0.0883868	0.876908		7	35	0	NA	0	NA	0
ANKH	0.0884614	0.876908		8	37	0	NA	0	NA	0
MMS19	0.0884888	0.876908		8	35	0	NA	0	NA	0
MYCL	0.0885437	0.876908		8	32	0	NA	0	NA	0
SMAD2	0.0887804	0.876908		7	35	1	equCab2	0	NA	1
RTP5	0.0888111	0.876908		5	21	2	octDeg1;pteAle1	7	otoGar3;nanGal1;turTru2;orcOrc1;balAcu1;odoRosDiv1;lepWed1	2
RHOXF1	0.0888157	0.876908		7	26	1	pteAle1	1	orcOrc1	1
CD200	0.0892655	0.876908		7	38	0	NA	0	NA	0
ADAMTSL5	0.0893412	0.876908		7	32	0	NA	0	NA	0
KRIT1	0.0894141	0.876908		8	34	0	NA	0	NA	0
PGD	0.0894585	0.876908		6	33	0	NA	0	NA	0
PTGFR	0.0894613	0.876908		7	39	0	NA	0	NA	0
DLG3	0.0894781	0.876908		7	34	1	equCab2	0	NA	1
LACTB	0.0894824	0.876908		4	23	0	NA	0	NA	0
ADD1	0.0895828	0.876908		8	33	0	NA	0	NA	0
KRTAP19_4	0.0900833	0.876908		4	32	1	loxAfr3	4	saiBol1;tarSyr2;mm10;rn6	1
KIAA2022	0.0901276	0.876908		7	33	1	equCab2	0	NA	1
CASR	0.0902343	0.876908		7	33	0	NA	0	NA	0
SPINK8	0.090359	0.876908		6	32	0	NA	0	NA	0
ADH4	0.0905887	0.876908		4	31	2	cavPor3;loxAfr3	2	balAcu1;triMan1	2
CDC7	0.0907124	0.876908		6	36	1	cavPor3	0	NA	1
BCAS4	0.0907598	0.876908		6	28	2	speTri2;octDeg1	3	micOch1;perManBai1;rn6	2
HMGA1	0.0907755	0.876908		8	40	0	NA	0	NA	0
UBE2L3	0.0910743	0.876908		7	36	0	NA	0	NA	0
DCLRE1A	0.0911139	0.876908		7	39	1	octDeg1	0	NA	1
C7orf26	0.0911791	0.876908		7	34	0	NA	0	NA	0
VAT1L	0.0911898	0.876908		7	36	1	equCab2	0	NA	1
INPP5K	0.0911976	0.876908		7	38	1	cavPor3	0	NA	1
BAIAP2L1	0.0912736	0.876908		7	34	1	pteAle1	0	NA	1
FANCE	0.0915102	0.876908		8	36	0	NA	0	NA	0
SYTL4	0.091565	0.876908		6	34	1	speTri2	1	tarSyr2	1
AIF1L	0.0915735	0.876908		6	27	0	NA	0	NA	0
CD300A	0.0917165	0.876908		6	33	1	loxAfr3	2	rn6;chrAsi1	1
GPR22	0.0918435	0.876908		7	40	0	NA	0	NA	0
SDR42E1	0.0918523	0.876908		8	39	2	pteAle1;pteVam1	0	NA	1
PNPLA2	0.0918986	0.876908		7	28	1	cavPor3	0	NA	1
TRIML2	0.0919245	0.876908		8	34	0	NA	0	NA	0
KCTD13	0.0921745	0.876908		8	33	0	NA	0	NA	0
PDGFD	0.0921759	0.876908		7	34	0	NA	0	NA	0
CCL16	0.0922282	0.876908		8	39	2	cavPor3;loxAfr3	4	mm10;rn6;nanGal1;oryCun2	2
C16orf86	0.092253	0.876908		8	39	0	NA	0	NA	0
ZNF329	0.0922806	0.876908		8	39	1	cavPor3	0	NA	1
PLK2	0.0931171	0.876908		7	34	0	NA	0	NA	0
DLGAP2	0.0932314	0.876908		5	22	0	NA	0	NA	0
RRBP1	0.093318	0.876908		7	35	0	NA	0	NA	0
SNX30	0.093361	0.876908		7	36	0	NA	0	NA	0
KRTAP20_2	0.093395	0.876908		8	34	3	speTri2;octDeg1;cerSim1	2	calJac3;perManBai1	3
CTPS2	0.0935319	0.876908		7	32	0	NA	0	NA	0
F7	0.0936721	0.876908		6	34	0	NA	0	NA	0
SLC19A3	0.093779	0.876908		7	37	0	NA	0	NA	0
CGNL1	0.0937954	0.876908		6	28	0	NA	0	NA	0
SORCS1	0.094051	0.876908		6	27	0	NA	0	NA	0
CLCC1	0.094164	0.876908		8	36	0	NA	0	NA	0
GNS	0.0945155	0.876908		7	34	0	NA	0	NA	0
LPPR5	0.0948159	0.876908		6	24	0	NA	0	NA	0
WIPF1	0.0951748	0.876908		6	32	0	NA	0	NA	0
ERI2	0.0956073	0.876908		7	39	1	equCab2	1	panPan1	1
DHRS12	0.0958737	0.876908		7	35	7	speTri2;cavPor3;octDeg1;equCab2;cerSim1;pteAle1;loxAfr3	17	rheMac3;macFas5;papAnu2;rhiRox1;otoGar3;mm10;rn6;nanGal1;hetGla2;oryCun2;ochPri3;felCat8;canFam3;musFur1;odoRosDiv1;eptFus1;myoLuc2	5
TAS2R14	0.0959213	0.876908		7	25	2	octDeg1;loxAfr3	2	panHod1;triMan1	2
KBTBD2	0.0959436	0.876908		8	38	0	NA	0	NA	0
PRRT1	0.0964917	0.876908		6	27	0	NA	0	NA	0
CD300LG	0.0965803	0.876908		8	39	1	cavPor3	2	vicPac2;orcOrc1	1
STK24	0.0966182	0.876908		8	36	1	cerSim1	0	NA	1
SOX6	0.0973119	0.876908		7	32	0	NA	0	NA	0
LDHC	0.098899	0.876908		5	33	0	NA	0	NA	0
TEPP	0.0995719	0.876908		8	36	0	NA	0	NA	0
AC108938.5	0.100205	0.876908		7	35	0	NA	0	NA	0
ERICH6	0.100304	0.876908		8	35	1	octDeg1	1	mm10	1
HDGFRP3	0.100534	0.876908		8	36	1	octDeg1	0	NA	1
MIA3	0.100662	0.876908		5	35	3	cavPor3;octDeg1;equCab2	8	rheMac3;macFas5;papAnu2;chlSab2;rhiRox1;mm10;rn6;triMan1	2
MYD88	0.100754	0.876908		7	34	1	octDeg1	0	NA	1
ITSN2	0.100787	0.876908		6	32	4	cavPor3;equCab2;cerSim1;pteAle1	15	panTro4;calJac3;saiBol1;mm10;rn6;orcOrc1;balAcu1;bosTau8;bisBis1;capHir1;canFam3;musFur1;odoRosDiv1;eptFus1;myoLuc2	3
PAX2	0.100823	0.876908		7	36	0	NA	0	NA	0
SBSN	0.101171	0.876908		6	36	1	loxAfr3	3	turTru2;orcOrc1;bisBis1	1
SYK	0.101252	0.876908		7	32	1	cavPor3	0	NA	1
ST6GALNAC3	0.101484	0.876908		7	31	0	NA	0	NA	0
UCMA	0.101646	0.876908		8	38	1	loxAfr3	2	camFer1;triMan1	1
E4F1	0.101728	0.876908		8	33	0	NA	0	NA	0
IFT74	0.101885	0.876908		5	33	0	NA	1	panPan1	0
C8G	0.102609	0.876908		8	29	1	octDeg1	0	NA	1
SLC18A3	0.102609	0.876908		8	31	0	NA	0	NA	0
KLF4	0.103005	0.876908		6	30	1	equCab2	0	NA	1
CCNDBP1	0.103176	0.876908		8	34	0	NA	0	NA	0
ZCWPW1	0.103209	0.876908		6	35	0	NA	0	NA	0
CLEC5A	0.103333	0.876908		8	36	2	pteAle1;pteVam1	2	turTru2;orcOrc1	1
TBPL2	0.103646	0.876908		8	35	1	equCab2	4	micOch1;perManBai1;mm10;rn6	1
ZNF679	0.103848	0.876908		5	27	4	cerSim1;pteAle1;pteVam1;loxAfr3	2	micOch1;myoDav1	3
LRRC53	0.10449	0.876908		6	38	0	NA	1	felCat8	0
IQCK	0.104711	0.876908		6	29	0	NA	0	NA	0
MBD4	0.104981	0.876908		8	36	0	NA	0	NA	0
CLN6	0.105007	0.876908		7	35	0	NA	0	NA	0
LONRF2	0.105306	0.876908		4	25	2	cavPor3;octDeg1	10	tarSyr2;hetGla2;oryCun2;ochPri3;vicPac2;panHod1;bosTau8;bisBis1;capHir1;conCri1	1
SNAPC2	0.105461	0.876908		7	39	4	cavPor3;octDeg1;equCab2;cerSim1	3	hetGla2;ochPri3;capHir1	2
EXOC6B	0.105635	0.876908		7	36	0	NA	0	NA	0
AMACR	0.105685	0.876908		7	32	0	NA	0	NA	0
ATP1A3	0.105692	0.876908		8	36	0	NA	0	NA	0
NXPH4	0.105712	0.876908		6	31	0	NA	0	NA	0
RTP4	0.105734	0.876908		7	38	1	octDeg1	0	NA	1
CLEC12B	0.10582	0.876908		6	38	2	cavPor3;equCab2	1	hetGla2	2
MRPS35	0.106308	0.876908		6	32	0	NA	0	NA	0
DUSP28	0.106421	0.876908		4	23	0	NA	0	NA	0
RPA4	0.106652	0.876908		6	40	4	speTri2;cavPor3;octDeg1;pteAle1	15	otoGar3;micOch1;mm10;rn6;nanGal1;oryCun2;ochPri3;panHod1;bosTau8;bisBis1;capHir1;canFam3;musFur1;conCri1;chrAsi1	3
CTTNBP2	0.106734	0.876908		5	33	1	loxAfr3	1	eptFus1	1
RAD54B	0.10695	0.876908		8	39	1	octDeg1	0	NA	1
LDLRAD1	0.107249	0.876908		7	39	1	cerSim1	0	NA	1
FUT2	0.107489	0.876908		7	36	2	pteAle1;pteVam1	0	NA	1
C10orf25	0.107617	0.876908		7	27	6	speTri2;cavPor3;octDeg1;cerSim1;pteAle1;pteVam1	17	ponAbe2;rhiRox1;calJac3;saiBol1;tarSyr2;otoGar3;perManBai1;nanGal1;hetGla2;ochPri3;vicPac2;camFer1;orcOrc1;balAcu1;bosTau8;capHir1;odoRosDiv1	4
CNGA3	0.107692	0.876908		8	38	0	NA	0	NA	0
EEFSEC	0.107819	0.876908		8	33	0	NA	0	NA	0
ALG13	0.107821	0.876908		7	33	1	pteAle1	0	NA	1
C16orf92	0.107853	0.876908		8	40	0	NA	0	NA	0
GRIK1	0.108289	0.876908		8	31	0	NA	0	NA	0
ZNF696	0.108478	0.876908		6	31	3	cavPor3;octDeg1;pteAle1	4	perManBai1;mm10;rn6;nanGal1	2
FAM160A2	0.109538	0.876908		7	34	0	NA	0	NA	0
CTBP1	0.110079	0.876908		6	32	0	NA	0	NA	0
MEFV	0.110128	0.876908		7	30	1	loxAfr3	7	mm10;rn6;turTru2;panHod1;bosTau8;bisBis1;capHir1	1
TAS2R19	0.110318	0.876908		5	31	3	speTri2;cavPor3;loxAfr3	10	saiBol1;tarSyr2;micOch1;rn6;oryCun2;vicPac2;camFer1;musFur1;odoRosDiv1;lepWed1	3
CDCA7	0.110588	0.876908		7	36	0	NA	0	NA	0
SAFB2	0.110721	0.876908		7	31	1	cavPor3	1	nanGal1	1
LGALS9	0.11074	0.876908		6	32	3	equCab2;cerSim1;loxAfr3	3	turTru2;capHir1;conCri1	2
GDF10	0.111047	0.876908		7	27	0	NA	0	NA	0
FAM120A	0.11117	0.876908		8	35	0	NA	1	micOch1	0
TMEM187	0.111342	0.876908		7	37	2	speTri2;cavPor3	4	mm10;rn6;hetGla2;odoRosDiv1	2
CRYBG3	0.111699	0.876908		5	33	5	speTri2;octDeg1;equCab2;cerSim1;pteAle1	16	ponAbe2;calJac3;saiBol1;nanGal1;vicPac2;panHod1;bosTau8;bisBis1;capHir1;felCat8;musFur1;odoRosDiv1;eptFus1;myoDav1;myoLuc2;conCri1	4
OSTM1	0.111736	0.876908		7	30	0	NA	0	NA	0
KIAA1468	0.111881	0.876908		8	35	0	NA	0	NA	0
CCZ1	0.112073	0.876908		8	34	0	NA	0	NA	0
ATP6V1G2_DDX39B	0.11237	0.876908		8	37	0	NA	0	NA	0
FCRL2	0.112429	0.876908		5	33	4	cavPor3;octDeg1;equCab2;cerSim1	12	hetGla2;ochPri3;vicPac2;camFer1;turTru2;orcOrc1;balAcu1;panHod1;bosTau8;bisBis1;capHir1;chrAsi1	2
SWT1	0.112501	0.876908		7	39	2	octDeg1;equCab2	1	chrAsi1	2
NUPL1	0.112852	0.876908		4	35	0	NA	0	NA	0
CUL4B	0.113152	0.876908		7	33	0	NA	0	NA	0
PBXIP1	0.113245	0.876908		5	35	0	NA	0	NA	0
CALML4	0.113283	0.876908		8	38	0	NA	0	NA	0
PAK1	0.113399	0.876908		8	38	0	NA	0	NA	0
COX7A2	0.114002	0.876908		7	38	1	cavPor3	0	NA	1
EDA2R	0.114685	0.876908		5	29	1	equCab2	2	otoGar3;canFam3	1
TSLP	0.114856	0.876908		6	34	1	equCab2	0	NA	1
C8B	0.11488	0.876908		7	36	1	octDeg1	0	NA	1
SULT1B1	0.115226	0.876908		6	34	2	speTri2;cavPor3	4	tarSyr2;otoGar3;triMan1;chrAsi1	2
FAM47E	0.115237	0.876908		8	34	2	cavPor3;octDeg1	0	NA	1
HLA_DPA1	0.115263	0.876908		4	32	1	equCab2	6	mm10;turTru2;orcOrc1;balAcu1;panHod1;conCri1	1
SRP14	0.115386	0.876908		8	37	0	NA	0	NA	0
MPZL1	0.116206	0.876908		5	38	1	loxAfr3	1	triMan1	1
MAP7D2	0.116322	0.876908		7	34	2	speTri2;cavPor3	3	micOch1;perManBai1;musFur1	2
LPPR4	0.116527	0.876908		7	34	0	NA	0	NA	0
NRGN	0.116612	0.876908		8	35	0	NA	0	NA	0
FBXO6	0.116851	0.876908		8	37	0	NA	0	NA	0
THADA	0.11703	0.876908		7	31	1	pteAle1	0	NA	1
KIAA1549L	0.117518	0.876908		7	33	0	NA	1	capHir1	0
TMEM253	0.117613	0.876908		7	38	0	NA	0	NA	0
C8orf87	0.117664	0.876908		6	34	5	speTri2;cavPor3;octDeg1;equCab2;pteAle1	19	rheMac3;macFas5;papAnu2;chlSab2;rhiRox1;calJac3;saiBol1;micOch1;perManBai1;mm10;rn6;nanGal1;hetGla2;panHod1;bosTau8;bisBis1;capHir1;canFam3;eptFus1	4
MAP3K9	0.117805	0.876908		6	36	0	NA	0	NA	0
TBATA	0.11799	0.876908		6	38	0	NA	1	perManBai1	0
TCERG1L	0.118073	0.876908		7	29	1	pteAle1	0	NA	1
EID2	0.118176	0.876908		6	22	1	octDeg1	0	NA	1
KRTAP19_3	0.118259	0.876908		8	37	3	speTri2;cavPor3;equCab2	6	perManBai1;mm10;nanGal1;ochPri3;canFam3;odoRosDiv1	3
ITM2A	0.118496	0.876908		6	31	1	cavPor3	1	bosTau8	1
UCP1	0.118533	0.876908		7	39	1	loxAfr3	4	turTru2;orcOrc1;balAcu1;triMan1	1
FAS	0.118751	0.876908		7	37	1	speTri2	0	NA	1
SMR3A	0.11908	0.876908		4	33	1	speTri2	2	ponAbe2;balAcu1	1
PNLIPRP1	0.119626	0.876908		8	37	5	cavPor3;cerSim1;pteAle1;pteVam1;loxAfr3	10	panTro4;panPan1;hetGla2;camFer1;balAcu1;panHod1;bosTau8;bisBis1;capHir1;triMan1	4
TCEAL2	0.11976	0.876908		6	23	1	cerSim1	1	triMan1	1
SAP30L	0.119853	0.876908		5	25	0	NA	0	NA	0
AGTR2	0.120496	0.876908		6	26	1	cavPor3	0	NA	1
RNF20	0.120528	0.876908		7	37	0	NA	0	NA	0
CEACAM8	0.120719	0.876908		4	22	2	speTri2;loxAfr3	4	hetGla2;panHod1;bisBis1;capHir1	2
GTF2A1L	0.120871	0.876908		6	38	0	NA	0	NA	0
C20orf96	0.12142	0.876908		7	35	0	NA	0	NA	0
C5orf52	0.121596	0.876908		4	23	4	octDeg1;cerSim1;pteAle1;loxAfr3	9	otoGar3;perManBai1;hetGla2;orcOrc1;balAcu1;felCat8;odoRosDiv1;eptFus1;myoDav1	4
DTNBP1	0.121724	0.876908		7	37	0	NA	0	NA	0
HIST2H2AB	0.121872	0.876908		8	39	2	pteAle1;pteVam1	0	NA	1
SRD5A3	0.122173	0.876908		7	28	0	NA	0	NA	0
AURKC	0.1222	0.876908		7	37	0	NA	0	NA	0
MURC	0.123128	0.876908		7	37	0	NA	0	NA	0
MBIP	0.123236	0.876908		7	36	0	NA	0	NA	0
CBR1	0.123447	0.876908		7	35	1	loxAfr3	0	NA	1
CES4A	0.123494	0.876908		7	34	4	equCab2;cerSim1;pteAle1;pteVam1	11	rheMac3;papAnu2;rhiRox1;turTru2;orcOrc1;canFam3;musFur1;odoRosDiv1;eptFus1;myoDav1;myoLuc2	2
F5	0.123801	0.876908		5	28	4	speTri2;cavPor3;octDeg1;equCab2	19	panPan1;rheMac3;macFas5;papAnu2;chlSab2;rhiRox1;calJac3;micOch1;mm10;vicPac2;camFer1;balAcu1;bosTau8;bisBis1;felCat8;musFur1;odoRosDiv1;myoDav1;myoLuc2	3
CHRNA2	0.123978	0.876908		7	36	0	NA	0	NA	0
UPP2	0.124006	0.876908		7	36	4	speTri2;equCab2;cerSim1;loxAfr3	11	chlSab2;calJac3;nanGal1;ochPri3;felCat8;canFam3;musFur1;odoRosDiv1;lepWed1;myoDav1;triMan1	3
CC2D1A	0.124021	0.876908		4	34	0	NA	1	panTro4	0
SHROOM4	0.124137	0.876908		7	31	0	NA	0	NA	0
GALNT11	0.124945	0.876908		7	33	0	NA	0	NA	0
GRAMD2	0.125063	0.876908		8	36	0	NA	0	NA	0
GABRE	0.12515	0.876908		7	34	0	NA	2	rn6;nanGal1	0
PRR15L	0.125629	0.876908		7	40	0	NA	0	NA	0
ZNF273	0.125632	0.876908		5	22	2	octDeg1;loxAfr3	3	chlSab2;tarSyr2;odoRosDiv1	2
PAPD7	0.125643	0.876908		6	38	0	NA	0	NA	0
WI2_3308P17.2	0.125686	0.876908		6	24	2	pteAle1;pteVam1	3	tarSyr2;musFur1;odoRosDiv1	1
SPATC1	0.125728	0.876908		8	33	0	NA	3	mm10;rn6;nanGal1	0
PTX4	0.125752	0.876908		8	38	2	cerSim1;loxAfr3	8	nanGal1;ochPri3;turTru2;orcOrc1;balAcu1;odoRosDiv1;lepWed1;conCri1	2
MRPL41	0.126146	0.876908		6	29	1	equCab2	0	NA	1
HSD17B2	0.126339	0.876908		6	35	0	NA	0	NA	0
ASB6	0.126401	0.876908		8	38	0	NA	0	NA	0
LOXHD1	0.126404	0.876908		4	31	0	NA	0	NA	0
ZBTB11	0.126452	0.876908		6	38	0	NA	0	NA	0
AKNAD1	0.126524	0.876908		8	40	2	pteAle1;pteVam1	1	nanGal1	1
CBL	0.126794	0.876908		7	34	0	NA	0	NA	0
TRPT1	0.127346	0.876908		7	39	0	NA	0	NA	0
ZNF441	0.127475	0.876908		4	23	2	octDeg1;cerSim1	12	perManBai1;nanGal1;vicPac2;camFer1;orcOrc1;bisBis1;canFam3;musFur1;odoRosDiv1;lepWed1;eptFus1;myoDav1	2
ATRN	0.127618	0.876908		8	32	1	equCab2	0	NA	1
EPHA6	0.127793	0.876908		5	26	0	NA	0	NA	0
CENPI	0.127914	0.876908		7	32	1	cavPor3	1	balAcu1	1
YWHAB	0.128133	0.876908		7	39	1	octDeg1	0	NA	1
EHBP1L1	0.128312	0.876908		6	33	6	speTri2;cavPor3;octDeg1;cerSim1;pteAle1;pteVam1	25	saiBol1;tarSyr2;otoGar3;micOch1;perManBai1;mm10;rn6;nanGal1;hetGla2;vicPac2;turTru2;orcOrc1;balAcu1;panHod1;bosTau8;bisBis1;capHir1;felCat8;canFam3;musFur1;odoRosDiv1;lepWed1;myoDav1;myoLuc2;conCri1	4
PTTG1IP	0.128417	0.876908		7	30	0	NA	0	NA	0
NUAK1	0.128446	0.876908		7	35	0	NA	0	NA	0
CBWD1	0.128906	0.876908		7	32	0	NA	0	NA	0
ALDH1B1	0.12963	0.876908		7	37	4	cavPor3;equCab2;pteAle1;loxAfr3	7	hetGla2;oryCun2;camFer1;panHod1;capHir1;lepWed1;triMan1	4
ALOX12B	0.129841	0.876908		8	35	0	NA	1	balAcu1	0
SLCO1B7	0.13051	0.876908		5	25	0	NA	0	NA	0
DNER	0.130592	0.876908		7	30	0	NA	0	NA	0
FAN1	0.130604	0.876908		6	37	0	NA	0	NA	0
PINX1	0.130701	0.876908		8	38	0	NA	0	NA	0
ETV3L	0.130708	0.876908		7	35	1	pteAle1	1	micOch1	1
PRR27	0.13088	0.876908		7	34	2	cavPor3;loxAfr3	4	panPan1;odoRosDiv1;myoDav1;myoLuc2	2
NTHL1	0.131441	0.876908		8	34	0	NA	0	NA	0
KRTAP6_3	0.131514	0.876908		7	34	1	cerSim1	4	vicPac2;camFer1;turTru2;orcOrc1	1
NUDT22	0.131714	0.876908		8	38	0	NA	0	NA	0
CERS5	0.131771	0.876908		8	38	0	NA	0	NA	0
CCL14	0.132318	0.876908		8	33	1	octDeg1	0	NA	1
MISP	0.132393	0.876908		5	32	2	cavPor3;octDeg1	1	hetGla2	1
HGFAC	0.132465	0.876908		7	32	0	NA	1	capHir1	0
RBM44	0.132468	0.876908		4	35	0	NA	0	NA	0
UGT1A9	0.13295	0.876908		6	23	0	NA	0	NA	0
C7orf34	0.133068	0.876908		5	37	2	speTri2;cerSim1	5	micOch1;nanGal1;myoDav1;myoLuc2;conCri1	2
CMA1	0.134122	0.876908		8	36	3	equCab2;pteAle1;pteVam1	2	capHir1;eptFus1	2
ALDH1L2	0.13446	0.876908		4	39	0	NA	0	NA	0
FBXL13	0.134561	0.876908		5	32	1	cerSim1	2	hetGla2;orcOrc1	1
RNASEH2B	0.134686	0.876908		7	37	3	speTri2;cavPor3;octDeg1	9	rheMac3;macFas5;papAnu2;chlSab2;rhiRox1;calJac3;saiBol1;hetGla2;ochPri3	2
COQ4	0.135805	0.876908		7	40	0	NA	0	NA	0
DNTTIP2	0.136684	0.876908		8	38	1	equCab2	0	NA	1
ROBO4	0.137851	0.876908		8	30	0	NA	0	NA	0
UAP1L1	0.137906	0.876908		7	29	0	NA	0	NA	0
CD300E	0.138143	0.876908		7	30	1	loxAfr3	2	calJac3;saiBol1	1
AP3B1	0.138235	0.876908		6	33	0	NA	0	NA	0
LY6G6E	0.138449	0.876908		8	39	2	pteAle1;pteVam1	1	orcOrc1	1
SMIM9	0.138551	0.876908		6	38	1	cavPor3	3	mm10;rn6;canFam3	1
SYCN	0.138758	0.876908		7	35	3	cavPor3;equCab2;loxAfr3	3	hetGla2;capHir1;triMan1	3
C1orf68	0.139131	0.876908		7	34	1	pteVam1	3	papAnu2;rn6;panHod1	1
C1orf162	0.139229	0.876908		8	39	1	octDeg1	0	NA	1
UBR5	0.139815	0.876908		6	34	1	cavPor3	0	NA	1
ACADSB	0.14026	0.876908		8	34	0	NA	0	NA	0
CDH23	0.140286	0.876908		5	28	1	pteAle1	2	rn6;balAcu1	1
TTC36	0.140512	0.876908		7	31	2	pteAle1;pteVam1	0	NA	1
ASIP	0.14071	0.876908		8	34	2	cavPor3;cerSim1	1	saiBol1	2
CD38	0.140764	0.876908		6	35	0	NA	0	NA	0
NINJ2	0.140819	0.876908		5	40	1	cerSim1	2	vicPac2;camFer1	1
TAS2R60	0.140834	0.876908		7	37	4	speTri2;equCab2;cerSim1;pteAle1	11	calJac3;camFer1;balAcu1;felCat8;canFam3;musFur1;odoRosDiv1;eptFus1;myoLuc2;conCri1;triMan1	3
C1S	0.141897	0.876908		8	39	1	loxAfr3	0	NA	1
POLR2M	0.14199	0.876908		8	37	1	cerSim1	0	NA	1
PEG3	0.142232	0.876908		7	34	5	cavPor3;equCab2;cerSim1;pteAle1;pteVam1	13	otoGar3;camFer1;turTru2;orcOrc1;bosTau8;felCat8;canFam3;musFur1;odoRosDiv1;lepWed1;eptFus1;myoDav1;myoLuc2	3
PPDPF	0.142371	0.876908		7	34	1	cavPor3	1	ochPri3	1
CYLC2	0.142688	0.876908		6	26	4	equCab2;cerSim1;pteAle1;loxAfr3	4	macFas5;papAnu2;ochPri3;vicPac2	3
TCTEX1D2	0.142862	0.876908		6	26	0	NA	0	NA	0
C3orf36	0.142924	0.876908		7	38	5	octDeg1;equCab2;cerSim1;pteVam1;loxAfr3	22	papAnu2;calJac3;saiBol1;tarSyr2;otoGar3;micOch1;perManBai1;rn6;nanGal1;oryCun2;turTru2;orcOrc1;balAcu1;panHod1;bisBis1;capHir1;felCat8;canFam3;musFur1;myoLuc2;conCri1;chrAsi1	4
ARID3B	0.142962	0.876908		7	37	0	NA	0	NA	0
ZSCAN16	0.143202	0.876908		6	35	2	cavPor3;pteAle1	4	micOch1;perManBai1;nanGal1;hetGla2	2
ACCSL	0.143441	0.876908		7	38	2	cerSim1;loxAfr3	6	tarSyr2;perManBai1;turTru2;orcOrc1;canFam3;lepWed1	2
AC007040.11	0.143488	0.876908		8	39	0	NA	0	NA	0
MOS	0.143767	0.876908		8	34	0	NA	0	NA	0
UPF3B	0.144293	0.876908		6	37	0	NA	0	NA	0
CCDC74A	0.144393	0.876908		5	24	2	cavPor3;octDeg1	2	rhiRox1;hetGla2	1
RP11_477N12.3	0.144536	0.876908		6	33	3	cavPor3;equCab2;cerSim1	4	hetGla2;myoDav1;myoLuc2;conCri1	2
ZNF736	0.144755	0.876908		5	29	3	speTri2;pteAle1;loxAfr3	5	tarSyr2;panHod1;capHir1;odoRosDiv1;myoDav1	3
HMGCS2	0.145035	0.876908		7	36	2	pteAle1;pteVam1	2	turTru2;orcOrc1	1
DSC1	0.145371	0.876908		7	34	0	NA	1	orcOrc1	0
FAM122B	0.145392	0.876908		8	37	1	speTri2	1	perManBai1	1
SERPINA1	0.14541	0.876908		8	38	0	NA	0	NA	0
FAM91A1	0.145616	0.876908		8	38	0	NA	0	NA	0
ZNF416	0.145999	0.876908		4	28	4	cavPor3;octDeg1;cerSim1;pteVam1	16	tarSyr2;perManBai1;mm10;hetGla2;oryCun2;ochPri3;turTru2;orcOrc1;balAcu1;panHod1;bosTau8;bisBis1;capHir1;felCat8;odoRosDiv1;lepWed1	3
WDR90	0.146276	0.876908		7	33	1	loxAfr3	2	tarSyr2;hetGla2	1
CLCNKB	0.147162	0.876908		8	36	0	NA	0	NA	0
KIAA0586	0.14773	0.876908		7	32	0	NA	1	calJac3	0
KRT9	0.147857	0.876908		6	34	3	equCab2;cerSim1;loxAfr3	4	ponAbe2;nanGal1;ochPri3;chrAsi1	2
ASPHD1	0.147936	0.876908		7	38	0	NA	0	NA	0
LRRC10	0.148217	0.876908		7	40	0	NA	0	NA	0
TAS2R10	0.148272	0.876908		7	34	4	octDeg1;cerSim1;pteAle1;pteVam1	2	nanGal1;triMan1	3
FAM111B	0.148273	0.876908		6	25	3	speTri2;cavPor3;cerSim1	3	chlSab2;calJac3;saiBol1	3
NTSR2	0.148482	0.876908		7	32	5	cavPor3;octDeg1;pteAle1;pteVam1;loxAfr3	6	camFer1;eptFus1;myoDav1;myoLuc2;conCri1;triMan1	3
GGN	0.148817	0.876908		5	23	0	NA	0	NA	0
PDHA2	0.148994	0.876908		7	36	1	speTri2	3	orcOrc1;balAcu1;canFam3	1
CEP295	0.149291	0.876908		7	36	2	octDeg1;pteAle1	4	calJac3;oryCun2;ochPri3;felCat8	2
EDDM3B	0.149531	0.876908		8	34	0	NA	0	NA	0
TRAF3IP1	0.149995	0.876908		7	27	0	NA	0	NA	0
TFE3	0.150234	0.876908		6	33	0	NA	0	NA	0
DSN1	0.150514	0.876908		6	32	0	NA	0	NA	0
CD68	0.150569	0.876908		8	39	0	NA	0	NA	0
HNRNPLL	0.150647	0.876908		6	37	0	NA	0	NA	0
HOXA10	0.150722	0.876908		5	25	1	equCab2	2	panPan1;rn6	1
CHEK2	0.151095	0.876908		7	34	0	NA	0	NA	0
USO1	0.151595	0.876908		6	35	0	NA	0	NA	0
SERPINA9	0.151609	0.876908		8	38	2	speTri2;equCab2	7	turTru2;orcOrc1;balAcu1;panHod1;bosTau8;capHir1;triMan1	2
FAM173B	0.151811	0.876908		8	38	0	NA	0	NA	0
PCNXL2	0.151933	0.876908		5	29	0	NA	0	NA	0
GSKIP	0.152682	0.876908		8	39	0	NA	0	NA	0
RASGRP4	0.152692	0.876908		7	38	0	NA	0	NA	0
DMTN	0.152947	0.876908		6	39	1	cavPor3	0	NA	1
CHCHD6	0.153414	0.876908		5	36	0	NA	0	NA	0
PEG10	0.153484	0.876908		7	37	0	NA	0	NA	0
ALKBH1	0.15367	0.876908		7	36	0	NA	0	NA	0
KRTAP13_2	0.154111	0.876908		7	32	1	loxAfr3	0	NA	1
AVPR1A	0.154776	0.876908		7	30	1	pteAle1	0	NA	1
PTPRQ	0.154876	0.876908		5	28	1	loxAfr3	0	NA	1
GKN1	0.155085	0.876908		7	40	0	NA	0	NA	0
CCDC151	0.155089	0.876908		5	35	0	NA	0	NA	0
TLR5	0.155284	0.876908		6	38	1	cavPor3	2	odoRosDiv1;lepWed1	1
TMEM61	0.155458	0.876908		8	37	2	cavPor3;octDeg1	2	otoGar3;hetGla2	1
STRC	0.155943	0.876908		7	35	1	cavPor3	1	panPan1	1
STK17A	0.156454	0.876908		8	30	2	pteAle1;pteVam1	0	NA	1
MPHOSPH9	0.156687	0.876908		6	31	0	NA	0	NA	0
ST5	0.156824	0.876908		8	37	0	NA	0	NA	0
KRTAP9_9	0.156971	0.876908		4	21	2	cavPor3;pteAle1	1	odoRosDiv1	2
C9orf170	0.157184	0.876908		6	36	5	speTri2;cavPor3;octDeg1;equCab2;pteAle1	26	rheMac3;macFas5;papAnu2;chlSab2;rhiRox1;tarSyr2;otoGar3;micOch1;perManBai1;mm10;rn6;ochPri3;orcOrc1;balAcu1;panHod1;bosTau8;bisBis1;capHir1;canFam3;musFur1;odoRosDiv1;lepWed1;eptFus1;myoDav1;myoLuc2;conCri1	4
SCARF1	0.157361	0.876908		4	25	0	NA	0	NA	0
SLCO2B1	0.157511	0.876908		7	36	0	NA	0	NA	0
HAVCR1	0.158087	0.876908		7	34	6	speTri2;cavPor3;equCab2;cerSim1;pteAle1;pteVam1	13	rheMac3;otoGar3;oryCun2;ochPri3;camFer1;bisBis1;felCat8;canFam3;musFur1;odoRosDiv1;lepWed1;myoDav1;conCri1	4
C16orf87	0.158165	0.876908		6	36	0	NA	0	NA	0
MBOAT7	0.158344	0.876908		7	31	0	NA	0	NA	0
NCAN	0.158423	0.876908		8	29	4	cavPor3;equCab2;pteAle1;loxAfr3	9	nanGal1;bosTau8;bisBis1;felCat8;canFam3;musFur1;odoRosDiv1;lepWed1;conCri1	4
GID4	0.159565	0.876908		5	21	0	NA	0	NA	0
MS4A10	0.159657	0.876908		6	35	3	equCab2;cerSim1;pteAle1	2	macFas5;conCri1	2
LRRC74B	0.159856	0.876908		7	25	2	equCab2;cerSim1	3	orcOrc1;balAcu1;chrAsi1	1
FABP9	0.159914	0.876908		8	40	2	cerSim1;pteAle1	0	NA	2
SNCG	0.159956	0.876908		7	38	0	NA	0	NA	0
CALCA	0.160341	0.876908		6	33	1	cerSim1	2	orcOrc1;balAcu1	1
HK3	0.160527	0.876908		7	40	1	loxAfr3	1	turTru2	1
SMG5	0.1612	0.876908		6	37	0	NA	0	NA	0
UGT2A3	0.161251	0.876908		4	22	2	cerSim1;pteVam1	3	turTru2;orcOrc1;musFur1	2
CDKL2	0.161671	0.876908		7	36	1	cerSim1	0	NA	1
CLDN25	0.161734	0.876908		8	34	1	loxAfr3	4	saiBol1;turTru2;orcOrc1;balAcu1	1
CREB3L4	0.162648	0.876908		7	39	0	NA	0	NA	0
TTC22	0.163113	0.876908		7	31	0	NA	0	NA	0
SH3D19	0.163854	0.876908		6	33	1	speTri2	0	NA	1
CLLU1	0.164126	0.876908		8	37	5	speTri2;cavPor3;octDeg1;equCab2;cerSim1	25	panPan1;rheMac3;macFas5;papAnu2;chlSab2;rhiRox1;calJac3;saiBol1;otoGar3;micOch1;mm10;rn6;nanGal1;hetGla2;oryCun2;ochPri3;vicPac2;camFer1;turTru2;orcOrc1;canFam3;musFur1;eptFus1;myoLuc2;conCri1	3
COPZ2	0.164445	0.876908		8	36	0	NA	0	NA	0
DDX31	0.164508	0.876908		7	35	0	NA	0	NA	0
FAM177B	0.164578	0.876908		7	34	3	octDeg1;pteAle1;pteVam1	4	mm10;rn6;myoDav1;myoLuc2	2
CLIP2	0.164702	0.876908		5	30	0	NA	1	balAcu1	0
PCF11	0.164815	0.876908		8	37	0	NA	1	myoDav1	0
IFIH1	0.165023	0.876908		8	35	1	pteVam1	0	NA	1
RP11_447L10.1	0.165164	0.876908		6	26	0	NA	0	NA	0
ABCA8	0.165279	0.876908		7	27	2	cavPor3;cerSim1	2	lepWed1;conCri1	2
SLC22A7	0.165287	0.876908		7	38	0	NA	1	canFam3	0
LIPF	0.165871	0.876908		7	37	1	pteAle1	2	capHir1;musFur1	1
IGLL5	0.166014	0.876908		4	24	1	cavPor3	3	calJac3;saiBol1;bisBis1	1
DEFB114	0.16654	0.876908		8	35	2	cavPor3;octDeg1	3	micOch1;perManBai1;mm10	1
ADAR	0.166577	0.876908		7	38	1	pteVam1	0	NA	1
MGC50722	0.166693	0.876908		6	32	6	speTri2;cavPor3;equCab2;cerSim1;pteAle1;pteVam1	8	otoGar3;nanGal1;camFer1;turTru2;felCat8;eptFus1;myoDav1;triMan1	4
FOXR2	0.166722	0.876908		4	27	2	equCab2;pteAle1	3	nanGal1;oryCun2;felCat8	2
FEM1A	0.167858	0.876908		8	30	0	NA	0	NA	0
CCDC86	0.16831	0.876908		7	38	0	NA	0	NA	0
CSRNP1	0.168492	0.876908		8	39	1	loxAfr3	0	NA	1
HTATSF1	0.168588	0.876908		5	34	1	loxAfr3	0	NA	1
ACSL6	0.168732	0.876908		6	35	0	NA	0	NA	0
TLCD2	0.169217	0.876908		8	36	4	speTri2;equCab2;pteAle1;pteVam1	3	calJac3;nanGal1;triMan1	3
CDH26	0.16954	0.876908		6	34	4	speTri2;cavPor3;octDeg1;pteAle1	8	rhiRox1;calJac3;saiBol1;hetGla2;oryCun2;ochPri3;camFer1;musFur1	3
SYT9	0.170168	0.876908		8	35	0	NA	0	NA	0
ANKRD66	0.17028	0.876908		7	36	0	NA	2	turTru2;orcOrc1	0
CYP4F12	0.170998	0.876908		5	27	1	equCab2	3	mm10;nanGal1;bosTau8	1
PQLC1	0.171062	0.876908		7	33	0	NA	0	NA	0
GPRASP1	0.171332	0.876908		4	28	2	pteAle1;pteVam1	6	tarSyr2;micOch1;perManBai1;balAcu1;panHod1;eptFus1	1
ANAPC15	0.171964	0.876908		7	35	1	speTri2	6	saiBol1;perManBai1;orcOrc1;canFam3;odoRosDiv1;lepWed1	1
EPB41L3	0.172161	0.876908		7	36	0	NA	0	NA	0
MAGEB3	0.172188	0.876908		6	38	2	octDeg1;pteVam1	3	tarSyr2;turTru2;panHod1	2
ZBED9	0.172359	0.876908		6	29	3	cavPor3;octDeg1;pteAle1	6	micOch1;mm10;hetGla2;oryCun2;ochPri3;chrAsi1	2
SLC15A1	0.172435	0.876908		6	36	0	NA	0	NA	0
CEP112	0.172531	0.876908		6	31	0	NA	0	NA	0
DCSTAMP	0.172704	0.876908		7	39	0	NA	0	NA	0
TFDP1	0.173336	0.876908		6	30	0	NA	0	NA	0
EVA1A	0.173931	0.876908		6	35	0	NA	0	NA	0
MAD2L1	0.174121	0.876908		6	33	1	loxAfr3	1	canFam3	1
RARRES1	0.174271	0.876908		6	31	1	cavPor3	0	NA	1
ARHGAP23	0.17435	0.876908		6	28	1	equCab2	0	NA	1
AC002365.5	0.174944	0.876908		5	28	2	cavPor3;pteAle1	4	ponAbe2;tarSyr2;perManBai1;bosTau8	2
GINM1	0.174997	0.876908		7	36	0	NA	0	NA	0
PRAMEF20	0.175111	0.876908		4	22	3	octDeg1;equCab2;pteVam1	6	tarSyr2;mm10;nanGal1;vicPac2;panHod1;capHir1	3
FAM183A	0.175512	0.876908		7	36	1	speTri2	5	tarSyr2;perManBai1;mm10;rn6;nanGal1	1
CYP3A4	0.176296	0.876908		4	23	1	speTri2	1	camFer1	1
KSR1	0.176582	0.876908		7	36	6	speTri2;octDeg1;equCab2;cerSim1;pteAle1;loxAfr3	24	calJac3;saiBol1;tarSyr2;otoGar3;micOch1;perManBai1;mm10;nanGal1;ochPri3;vicPac2;camFer1;balAcu1;bosTau8;bisBis1;felCat8;canFam3;musFur1;odoRosDiv1;eptFus1;myoDav1;myoLuc2;conCri1;triMan1;chrAsi1	5
ABCG8	0.176824	0.876908		8	35	1	loxAfr3	1	triMan1	1
RELB	0.176901	0.876908		4	25	1	pteAle1	0	NA	1
FHOD3	0.177077	0.876908		5	27	0	NA	0	NA	0
C5orf63	0.177537	0.876908		7	39	0	NA	0	NA	0
FMO1	0.177709	0.876908		7	36	0	NA	2	turTru2;orcOrc1	0
PJA1	0.177806	0.876908		6	33	0	NA	0	NA	0
ELMSAN1	0.177975	0.876908		6	31	0	NA	0	NA	0
SEC14L4	0.178146	0.876908		7	36	0	NA	1	triMan1	0
FDCSP	0.178186	0.876908		7	36	1	loxAfr3	2	orcOrc1;conCri1	1
C12orf45	0.178887	0.876908		7	31	2	cavPor3;octDeg1	0	NA	1
MFAP3	0.179009	0.876908		7	37	0	NA	0	NA	0
CD163	0.179074	0.876908		6	33	0	NA	0	NA	0
ASB16	0.179527	0.876908		7	29	2	cavPor3;octDeg1	2	nanGal1;chrAsi1	1
AC010879.1	0.180053	0.876908		7	24	0	NA	0	NA	0
TMEM54	0.180107	0.876908		7	38	0	NA	0	NA	0
RAD9B	0.180335	0.876908		8	36	0	NA	0	NA	0
TSTD2	0.180407	0.876908		7	39	0	NA	0	NA	0
CCDC96	0.1805	0.876908		6	22	0	NA	0	NA	0
KIF19	0.180928	0.876908		6	31	2	cavPor3;octDeg1	1	myoDav1	1
GPRC6A	0.181756	0.876908		7	40	2	cavPor3;octDeg1	9	mm10;ochPri3;turTru2;orcOrc1;balAcu1;panHod1;bosTau8;bisBis1;capHir1	1
TMEM60	0.182324	0.876908		7	38	1	speTri2	0	NA	1
AQP6	0.182368	0.876908		8	39	2	pteAle1;pteVam1	0	NA	1
ELP5	0.182583	0.876908		7	37	0	NA	0	NA	0
CTD_2132N18.3	0.183265	0.876908		8	39	0	NA	0	NA	0
HIST1H4L	0.183275	0.876908		7	35	1	cavPor3	2	perManBai1;nanGal1	1
CHAMP1	0.183513	0.876908		5	28	0	NA	0	NA	0
SENP6	0.183723	0.876908		5	36	0	NA	0	NA	0
TLL1	0.183751	0.876908		5	25	0	NA	0	NA	0
MAPT	0.183798	0.876908		8	35	2	speTri2;octDeg1	1	conCri1	2
PDLIM4	0.183798	0.876908		7	39	0	NA	0	NA	0
IGSF23	0.184265	0.876908		5	37	4	cavPor3;equCab2;cerSim1;loxAfr3	9	rheMac3;chlSab2;rhiRox1;nanGal1;hetGla2;oryCun2;turTru2;orcOrc1;capHir1	3
RP4_576H24.4	0.185031	0.876908		4	23	0	NA	1	perManBai1	0
ZNF514	0.185257	0.876908		6	31	2	cavPor3;octDeg1	4	mm10;rn6;oryCun2;ochPri3	1
RP11_449H3.3	0.185414	0.876908		8	35	0	NA	0	NA	0
IFIT2	0.185471	0.876908		5	39	1	cerSim1	3	turTru2;orcOrc1;balAcu1	1
TTC23	0.18561	0.876908		7	37	1	pteAle1	0	NA	1
C6orf52	0.185622	0.876908		6	35	0	NA	1	mm10	0
ARHGEF6	0.186006	0.876908		5	33	1	cavPor3	0	NA	1
AFMID	0.186008	0.876908		7	31	0	NA	0	NA	0
ZNF142	0.186177	0.876908		8	32	6	speTri2;cavPor3;octDeg1;equCab2;cerSim1;loxAfr3	22	saiBol1;tarSyr2;otoGar3;micOch1;perManBai1;mm10;rn6;nanGal1;hetGla2;ochPri3;turTru2;orcOrc1;balAcu1;bosTau8;felCat8;canFam3;musFur1;odoRosDiv1;eptFus1;myoDav1;myoLuc2;conCri1	4
CTD_2135J3.4	0.186184	0.876908		6	30	1	pteAle1	1	myoDav1	1
LMNTD1	0.186274	0.876908		7	33	0	NA	0	NA	0
LRRC29	0.186629	0.876908		8	39	1	cerSim1	4	papAnu2;orcOrc1;odoRosDiv1;lepWed1	1
APOL6	0.187071	0.876908		7	39	0	NA	2	rn6;ochPri3	0
AKR1C2	0.18714	0.876908		6	22	2	cerSim1;loxAfr3	2	micOch1;vicPac2	2
SLC6A4	0.187235	0.876908		8	38	0	NA	0	NA	0
AC092881.1	0.187287	0.876908		8	40	7	speTri2;cavPor3;octDeg1;equCab2;pteAle1;pteVam1;loxAfr3	27	panTro4;panPan1;rheMac3;macFas5;papAnu2;calJac3;tarSyr2;otoGar3;micOch1;perManBai1;mm10;rn6;nanGal1;oryCun2;ochPri3;vicPac2;camFer1;balAcu1;panHod1;capHir1;felCat8;canFam3;lepWed1;myoDav1;myoLuc2;conCri1;triMan1	5
FCGR1A	0.187635	0.876908		8	36	0	NA	2	perManBai1;orcOrc1	0
ADAM9	0.188687	0.876908		7	35	0	NA	0	NA	0
SLC2A10	0.189272	0.876908		6	33	0	NA	0	NA	0
ALMS1	0.189379	0.876908		4	28	4	cavPor3;octDeg1;equCab2;pteAle1	15	chlSab2;otoGar3;micOch1;perManBai1;mm10;rn6;hetGla2;ochPri3;camFer1;orcOrc1;panHod1;bosTau8;bisBis1;capHir1;myoDav1	3
LCE1E	0.189698	0.876908		6	27	2	octDeg1;loxAfr3	1	capHir1	2
REG3A	0.189767	0.876908		7	32	1	speTri2	0	NA	1
C14orf39	0.189783	0.876908		7	35	1	cavPor3	0	NA	1
C10orf67	0.189858	0.876908		8	35	0	NA	0	NA	0
PRDM16	0.18988	0.876908		5	23	1	speTri2	0	NA	1
MVP	0.190261	0.876908		6	37	2	pteAle1;loxAfr3	1	chrAsi1	2
KCNT2	0.190499	0.876908		6	26	0	NA	1	myoDav1	0
CYFIP2	0.190647	0.876908		6	34	0	NA	0	NA	0
MAMLD1	0.190903	0.876908		8	30	1	speTri2	0	NA	1
THEM4	0.190996	0.876908		5	37	0	NA	1	bosTau8	0
ADAMTS13	0.191163	0.876908		4	27	3	cavPor3;octDeg1;loxAfr3	5	felCat8;odoRosDiv1;myoDav1;triMan1;chrAsi1	2
TTC13	0.191421	0.876908		7	34	0	NA	0	NA	0
LUC7L2	0.191528	0.876908		6	37	1	octDeg1	0	NA	1
TMEM89	0.191583	0.876908		7	37	0	NA	0	NA	0
TRPV2	0.19185	0.876908		7	32	1	cavPor3	0	NA	1
CHST7	0.192044	0.876908		7	22	0	NA	0	NA	0
THEMIS	0.192071	0.876908		7	35	0	NA	0	NA	0
FXYD5	0.192323	0.876908		8	34	2	pteAle1;pteVam1	2	otoGar3;oryCun2	1
DLGAP5	0.192382	0.876908		7	34	0	NA	1	mm10	0
ZNF140	0.192812	0.876908		8	33	1	octDeg1	1	tarSyr2	1
EXT1	0.192893	0.876908		6	35	0	NA	0	NA	0
ERICH3	0.193023	0.876908		7	33	4	cavPor3;octDeg1;equCab2;cerSim1	14	micOch1;perManBai1;mm10;rn6;nanGal1;orcOrc1;balAcu1;panHod1;bosTau8;bisBis1;felCat8;musFur1;myoDav1;chrAsi1	2
C19orf44	0.193694	0.876908		7	34	0	NA	1	perManBai1	0
ASPSCR1	0.193833	0.876908		7	35	1	speTri2	0	NA	1
PHLDA1	0.194048	0.876908		5	24	0	NA	0	NA	0
NLRP12	0.194808	0.876908		7	29	3	cavPor3;octDeg1;loxAfr3	3	hetGla2;turTru2;orcOrc1	2
PPP3R2	0.194945	0.876908		8	39	0	NA	2	turTru2;orcOrc1	0
KRTAP26_1	0.194976	0.876908		6	36	0	NA	0	NA	0
CYP2A13	0.195171	0.876908		4	25	1	pteAle1	3	turTru2;orcOrc1;balAcu1	1
FAM149B1	0.195438	0.876908		6	39	0	NA	0	NA	0
HBM	0.195757	0.876908		7	32	3	cavPor3;octDeg1;cerSim1	4	rheMac3;micOch1;perManBai1;mm10	2
CNTF	0.195785	0.876908		8	40	0	NA	0	NA	0
EBP	0.196086	0.876908		8	35	1	loxAfr3	1	panHod1	1
DYDC2	0.196276	0.876908		8	38	1	equCab2	5	panHod1;bisBis1;capHir1;canFam3;odoRosDiv1	1
SLC18A2	0.196558	0.876908		7	33	0	NA	0	NA	0
SLC47A2	0.196562	0.876908		7	30	4	speTri2;cavPor3;octDeg1;pteAle1	4	tarSyr2;nanGal1;hetGla2;myoDav1	3
SPIN2A	0.196778	0.876908		5	23	1	octDeg1	1	rhiRox1	1
ZNF839	0.197101	0.876908		6	35	0	NA	4	calJac3;saiBol1;micOch1;myoLuc2	0
MUC21	0.197145	0.876908		5	24	3	speTri2;pteAle1;pteVam1	9	panTro4;chlSab2;calJac3;tarSyr2;rn6;hetGla2;turTru2;bisBis1;myoDav1	2
KRTAP19_5	0.197546	0.876908		8	40	3	pteAle1;pteVam1;loxAfr3	1	ochPri3	2
FANCD2	0.197889	0.876908		6	29	1	cerSim1	3	panTro4;rheMac3;rhiRox1	1
CTD_2140B24.4	0.198035	0.876908		6	24	4	speTri2;pteAle1;pteVam1;loxAfr3	5	saiBol1;hetGla2;canFam3;eptFus1;myoLuc2	3
LILRA2	0.19804	0.876908		6	28	5	cavPor3;octDeg1;cerSim1;pteAle1;pteVam1	10	calJac3;tarSyr2;otoGar3;perManBai1;mm10;rn6;nanGal1;oryCun2;felCat8;canFam3	3
TLR8	0.198308	0.876908		7	38	0	NA	0	NA	0
CCDC155	0.198326	0.876908		7	33	0	NA	0	NA	0
C5orf66	0.198519	0.876908		7	38	7	speTri2;cavPor3;octDeg1;equCab2;cerSim1;pteAle1;pteVam1	24	ponAbe2;rheMac3;macFas5;papAnu2;chlSab2;rhiRox1;calJac3;saiBol1;tarSyr2;otoGar3;perManBai1;mm10;hetGla2;camFer1;turTru2;orcOrc1;balAcu1;bosTau8;bisBis1;capHir1;felCat8;canFam3;eptFus1;myoLuc2	4
ADPRM	0.198522	0.876908		8	39	0	NA	0	NA	0
FOPNL	0.198927	0.876908		8	36	0	NA	0	NA	0
TSSK2	0.199017	0.876908		8	38	2	cavPor3;octDeg1	1	hetGla2	1
IQCF3	0.199055	0.876908		7	36	1	equCab2	0	NA	1
C11orf73	0.1992	0.876908		8	37	0	NA	0	NA	0
TSPAN32	0.20011	0.876908		5	27	0	NA	0	NA	0
RESP18	0.200595	0.876908		7	36	3	cavPor3;pteAle1;pteVam1	6	calJac3;saiBol1;otoGar3;musFur1;odoRosDiv1;eptFus1	2
BDH1	0.200683	0.876908		6	33	0	NA	2	orcOrc1;balAcu1	0
TRBV28	0.200821	0.876908		6	30	1	equCab2	2	bosTau8;capHir1	1
ZFP28	0.200908	0.876908		6	29	0	NA	0	NA	0
EPB41L4A	0.201034	0.876908		7	34	0	NA	1	canFam3	0
LAT	0.202164	0.876908		5	40	0	NA	0	NA	0
SUGT1	0.202504	0.876908		6	37	1	octDeg1	1	myoDav1	1
GBP5	0.202642	0.876908		6	29	1	cavPor3	3	odoRosDiv1;lepWed1;triMan1	1
KIF18B	0.202658	0.876908		8	40	1	cavPor3	3	mm10;panHod1;capHir1	1
RSL1D1	0.202723	0.876908		7	37	0	NA	0	NA	0
RFWD3	0.202791	0.876908		7	34	0	NA	0	NA	0
NAA16	0.202914	0.876908		7	34	2	cavPor3;octDeg1	1	hetGla2	1
NMRAL1	0.203202	0.876908		7	37	1	octDeg1	0	NA	1
DCAF6	0.203825	0.876908		6	37	0	NA	0	NA	0
CIC	0.204601	0.876908		7	36	0	NA	1	balAcu1	0
DPRX	0.204886	0.876908		4	27	1	loxAfr3	4	panHod1;bosTau8;capHir1;triMan1	1
TAPBP	0.205058	0.876908		8	36	0	NA	0	NA	0
MAN1B1	0.205088	0.876908		5	23	0	NA	0	NA	0
UBXN8	0.20523	0.876908		7	30	0	NA	1	balAcu1	0
LCE1C	0.205241	0.876908		6	25	3	speTri2;cavPor3;loxAfr3	2	rheMac3;bosTau8	3
PCDHA3	0.20541	0.876908		6	22	0	NA	0	NA	0
ARHGEF11	0.206042	0.876908		8	35	0	NA	0	NA	0
RPN2	0.206218	0.876908		8	37	0	NA	0	NA	0
OASL	0.206614	0.876908		7	35	1	speTri2	1	capHir1	1
ST3GAL3	0.206969	0.876908		5	32	0	NA	0	NA	0
CTD_2369P2.10	0.207165	0.876908		8	38	0	NA	0	NA	0
FHIT	0.207189	0.876908		7	33	1	octDeg1	1	otoGar3	1
LY96	0.207252	0.876908		7	39	0	NA	0	NA	0
F11	0.207579	0.876908		7	37	1	pteAle1	2	myoDav1;myoLuc2	1
DDC	0.208466	0.876908		7	33	0	NA	0	NA	0
STATH	0.208687	0.876908		6	28	1	loxAfr3	1	balAcu1	1
SCGB3A2	0.208763	0.876908		8	38	1	cavPor3	1	canFam3	1
MZT2B	0.208894	0.876908		7	27	1	cerSim1	3	rhiRox1;mm10;rn6	1
XKR9	0.209002	0.876908		6	38	1	cavPor3	0	NA	1
ZNF525	0.209106	0.876908		4	24	4	equCab2;cerSim1;pteVam1;loxAfr3	12	rheMac3;papAnu2;calJac3;saiBol1;tarSyr2;otoGar3;perManBai1;mm10;balAcu1;bosTau8;canFam3;triMan1	3
CDKAL1	0.209596	0.876908		5	30	0	NA	0	NA	0
HK2	0.209685	0.876908		7	35	0	NA	0	NA	0
FAM13A	0.210299	0.876908		7	33	0	NA	0	NA	0
SAA4	0.210737	0.876908		4	33	2	cavPor3;cerSim1	4	vicPac2;myoLuc2;conCri1;chrAsi1	2
ACBD7	0.211208	0.876908		8	37	1	speTri2	1	balAcu1	1
CD59	0.211208	0.876908		8	38	0	NA	0	NA	0
PGBD1	0.211444	0.876908		7	35	1	pteVam1	4	perManBai1;mm10;rn6;nanGal1	1
MYSM1	0.211711	0.876908		8	38	0	NA	0	NA	0
C22orf15	0.211855	0.876908		8	38	1	loxAfr3	3	turTru2;bosTau8;conCri1	1
TMEM236	0.211909	0.876908		7	36	0	NA	0	NA	0
RLN2	0.212737	0.876908		7	34	3	pteAle1;pteVam1;loxAfr3	3	nanGal1;conCri1;triMan1	2
ADH7	0.212898	0.876908		6	33	3	cavPor3;cerSim1;loxAfr3	10	vicPac2;turTru2;panHod1;bisBis1;capHir1;felCat8;canFam3;musFur1;odoRosDiv1;chrAsi1	3
SPRR2B	0.21294	0.876908		5	28	1	pteVam1	0	NA	1
SNX22	0.213101	0.876908		6	33	0	NA	0	NA	0
EXD3	0.213309	0.876908		8	25	5	speTri2;cavPor3;octDeg1;pteAle1;loxAfr3	9	otoGar3;micOch1;perManBai1;mm10;rn6;nanGal1;hetGla2;musFur1;odoRosDiv1	4
BOLA1	0.213332	0.876908		6	38	0	NA	0	NA	0
SLC30A8	0.213734	0.876908		7	36	2	cavPor3;octDeg1	2	hetGla2;bisBis1	1
GBP3	0.213762	0.876908		6	32	1	cavPor3	1	mm10	1
NAP1L1	0.213933	0.876908		7	36	1	speTri2	0	NA	1
CD47	0.213952	0.876908		7	37	0	NA	0	NA	0
CAMK4	0.214032	0.876908		7	28	1	equCab2	0	NA	1
SCN1A	0.214209	0.876908		6	35	0	NA	0	NA	0
GSTM2	0.214233	0.876908		6	21	0	NA	1	tarSyr2	0
TCTN1	0.214252	0.876908		7	37	0	NA	1	panPan1	0
GCC1	0.214825	0.876908		8	38	0	NA	0	NA	0
PARP9	0.215059	0.876908		6	37	1	loxAfr3	2	triMan1;chrAsi1	1
TMPRSS11B	0.21559	0.876908		6	33	3	speTri2;cerSim1;loxAfr3	11	micOch1;rn6;nanGal1;panHod1;bosTau8;bisBis1;capHir1;felCat8;canFam3;lepWed1;triMan1	3
APOL5	0.215768	0.876908		7	34	6	speTri2;cavPor3;equCab2;pteAle1;pteVam1;loxAfr3	22	ponAbe2;chlSab2;saiBol1;tarSyr2;otoGar3;perManBai1;mm10;rn6;nanGal1;hetGla2;ochPri3;vicPac2;camFer1;turTru2;orcOrc1;bosTau8;capHir1;felCat8;odoRosDiv1;lepWed1;triMan1;chrAsi1	5
CCNB3	0.215787	0.876908		6	29	6	speTri2;cavPor3;octDeg1;equCab2;cerSim1;pteAle1	21	rheMac3;macFas5;papAnu2;chlSab2;saiBol1;tarSyr2;otoGar3;micOch1;perManBai1;mm10;rn6;hetGla2;camFer1;orcOrc1;balAcu1;felCat8;canFam3;musFur1;odoRosDiv1;lepWed1;conCri1	4
KBTBD8	0.215993	0.876908		4	38	1	octDeg1	2	perManBai1;panHod1	1
AD000671.6	0.216101	0.876908		8	38	8	speTri2;cavPor3;octDeg1;equCab2;cerSim1;pteAle1;pteVam1;loxAfr3	22	tarSyr2;otoGar3;micOch1;perManBai1;mm10;rn6;nanGal1;hetGla2;oryCun2;ochPri3;panHod1;bosTau8;bisBis1;capHir1;canFam3;musFur1;lepWed1;eptFus1;myoDav1;myoLuc2;triMan1;chrAsi1	5
ASB13	0.216241	0.876908		8	33	0	NA	1	rhiRox1	0
SDHAF1	0.216486	0.876908		7	38	0	NA	0	NA	0
NXF5	0.216614	0.876908		8	30	1	cavPor3	2	ponAbe2;saiBol1	1
TEX13B	0.216618	0.876908		6	33	2	equCab2;cerSim1	10	rhiRox1;mm10;rn6;ochPri3;vicPac2;camFer1;turTru2;orcOrc1;myoDav1;conCri1	1
DHRS2	0.216816	0.876908		6	38	4	speTri2;cavPor3;octDeg1;loxAfr3	13	micOch1;rn6;hetGla2;vicPac2;camFer1;turTru2;panHod1;bosTau8;bisBis1;capHir1;lepWed1;eptFus1;triMan1	3
C5orf58	0.216839	0.876908		7	39	0	NA	0	NA	0
TNFRSF11A	0.216947	0.876908		8	32	0	NA	0	NA	0
XRCC6	0.216956	0.876908		7	34	0	NA	0	NA	0
ARSE	0.217012	0.876908		5	22	1	speTri2	0	NA	1
HILPDA	0.217088	0.876908		7	37	0	NA	2	bosTau8;bisBis1	0
PCDHGA6	0.217124	0.876908		7	36	1	speTri2	1	canFam3	1
ACOT6	0.217497	0.876908		8	39	1	cavPor3	1	ochPri3	1
OVGP1	0.217679	0.876908		7	34	4	speTri2;equCab2;pteAle1;pteVam1	3	rn6;hetGla2;canFam3	3
CSRNP3	0.217876	0.876908		8	36	1	pteAle1	0	NA	1
ZDHHC23	0.218035	0.876908		8	39	0	NA	0	NA	0
CUL9	0.218306	0.876908		6	33	1	pteAle1	1	perManBai1	1
LTB4R	0.219224	0.876908		8	34	0	NA	3	turTru2;orcOrc1;balAcu1	0
EFCAB14	0.219233	0.876908		7	37	1	equCab2	5	vicPac2;camFer1;eptFus1;myoDav1;myoLuc2	1
NPW	0.219233	0.876908		8	24	1	pteAle1	0	NA	1
BUB1B	0.219611	0.876908		6	36	0	NA	0	NA	0
PLEKHO2	0.219935	0.876908		8	36	1	octDeg1	0	NA	1
DYRK1A	0.220026	0.876908		7	36	0	NA	1	felCat8	0
ZBED2	0.220756	0.876908		7	40	3	speTri2;cavPor3;octDeg1	9	micOch1;perManBai1;mm10;rn6;nanGal1;ochPri3;balAcu1;conCri1;triMan1	2
RBM26	0.220797	0.876908		5	36	0	NA	0	NA	0
PDE12	0.220837	0.876908		7	37	0	NA	0	NA	0
KLRB1	0.221066	0.876908		6	25	1	cavPor3	0	NA	1
VWA7	0.22114	0.876908		7	36	2	pteAle1;pteVam1	2	odoRosDiv1;lepWed1	1
PROC	0.221324	0.876908		6	25	1	cavPor3	1	camFer1	1
PRR23C	0.221641	0.876908		6	34	1	loxAfr3	3	nanGal1;turTru2;eptFus1	1
ZC3HAV1L	0.221968	0.876908		5	24	0	NA	0	NA	0
IFIT1B	0.222041	0.876908		5	27	3	cavPor3;equCab2;cerSim1	8	panTro4;calJac3;saiBol1;camFer1;turTru2;felCat8;canFam3;musFur1	2
RAB6B	0.222095	0.876908		7	38	0	NA	0	NA	0
PDE4C	0.222107	0.876908		7	32	1	cavPor3	1	ochPri3	1
TSC22D2	0.222112	0.876908		4	24	0	NA	0	NA	0
C5orf55	0.222187	0.876908		4	26	3	speTri2;octDeg1;cerSim1	14	rheMac3;calJac3;otoGar3;micOch1;perManBai1;mm10;rn6;hetGla2;ochPri3;turTru2;orcOrc1;balAcu1;bosTau8;myoDav1	3
NOS1AP	0.222338	0.876908		5	32	0	NA	0	NA	0
TOM1L2	0.222359	0.876908		7	36	0	NA	0	NA	0
ALB	0.222517	0.876908		7	40	1	speTri2	1	myoDav1	1
ATRIP	0.222667	0.876908		8	37	0	NA	0	NA	0
SPACA7	0.223059	0.876908		6	32	2	cavPor3;octDeg1	2	hetGla2;panHod1	1
LA16c_306E5.2	0.223117	0.876908		7	32	0	NA	0	NA	0
KCNA6	0.223146	0.876908		5	32	0	NA	0	NA	0
SRR	0.223712	0.876908		7	38	0	NA	0	NA	0
CD300LF	0.224011	0.876908		4	36	0	NA	0	NA	0
ISG15	0.224226	0.876908		8	37	0	NA	0	NA	0
RETNLB	0.224272	0.876908		6	38	3	cavPor3;pteAle1;loxAfr3	10	ponAbe2;calJac3;tarSyr2;ochPri3;balAcu1;panHod1;bosTau8;bisBis1;capHir1;felCat8	3
TTLL2	0.224369	0.876908		6	28	5	speTri2;cavPor3;octDeg1;equCab2;cerSim1	6	micOch1;nanGal1;hetGla2;felCat8;musFur1;triMan1	3
TECTA	0.225002	0.876908		6	35	0	NA	0	NA	0
ZRANB3	0.22523	0.876908		7	32	0	NA	3	panPan1;capHir1;felCat8	0
RPS6KA6	0.225297	0.876908		7	31	1	cavPor3	2	ponAbe2;otoGar3	1
MYOC	0.225385	0.876908		6	34	0	NA	0	NA	0
KRTAP19_2	0.225755	0.876908		8	34	1	octDeg1	0	NA	1
SMC1A	0.225888	0.876908		6	36	0	NA	1	balAcu1	0
HIST1H2BB	0.225937	0.876908		8	35	1	equCab2	1	otoGar3	1
EEF1A1	0.226427	0.876908		6	35	1	loxAfr3	1	turTru2	1
ABCD2	0.22648	0.876908		7	33	0	NA	0	NA	0
LCN8	0.226511	0.876908		8	34	1	loxAfr3	3	calJac3;turTru2;orcOrc1	1
FRMPD3	0.226867	0.876908		7	31	1	loxAfr3	1	rn6	1
DLG4	0.226937	0.876908		7	38	0	NA	0	NA	0
NMUR2	0.226974	0.876908		7	33	1	cavPor3	0	NA	1
FANCA	0.227011	0.876908		7	30	0	NA	1	bisBis1	0
IL20RA	0.227225	0.876908		8	39	1	equCab2	0	NA	1
FTCD	0.227448	0.876908		7	30	0	NA	0	NA	0
NUMA1	0.227605	0.876908		7	38	1	loxAfr3	1	turTru2	1
PPA2	0.227776	0.876908		8	37	0	NA	0	NA	0
LGR5	0.227979	0.876908		7	34	0	NA	0	NA	0
VSX1	0.228372	0.876908		6	25	1	pteAle1	0	NA	1
ACAA1	0.228484	0.876908		8	34	1	cavPor3	0	NA	1
IL26	0.228526	0.876908		8	34	2	equCab2;loxAfr3	9	tarSyr2;micOch1;perManBai1;mm10;nanGal1;hetGla2;ochPri3;balAcu1;bosTau8	2
GIMAP4	0.228694	0.876908		5	27	1	cerSim1	1	musFur1	1
GM2A	0.229309	0.876908		8	37	0	NA	0	NA	0
HCFC1R1	0.229312	0.876908		8	39	0	NA	0	NA	0
CPEB3	0.229408	0.876908		7	22	0	NA	0	NA	0
ADCY1	0.229654	0.876908		6	27	0	NA	0	NA	0
LLGL2	0.229673	0.876908		7	37	1	loxAfr3	1	turTru2	1
KCNH7	0.229695	0.876908		8	34	0	NA	0	NA	0
PSTK	0.229735	0.876908		8	37	0	NA	0	NA	0
BDKRB1	0.230276	0.876908		7	40	1	cavPor3	0	NA	1
C11orf24	0.230431	0.876908		6	32	0	NA	0	NA	0
RRP15	0.230497	0.876908		7	38	0	NA	0	NA	0
SH2D4B	0.230682	0.876908		6	36	0	NA	0	NA	0
ATP8B1	0.23087	0.876908		5	34	0	NA	0	NA	0
KRTAP20_4	0.231031	0.876908		5	26	2	octDeg1;cerSim1	6	rheMac3;macFas5;papAnu2;chlSab2;rhiRox1;felCat8	2
KCTD17	0.231061	0.876908		4	28	0	NA	0	NA	0
NCR3	0.231218	0.876908		6	38	1	speTri2	3	vicPac2;camFer1;chrAsi1	1
DKKL1	0.231632	0.876908		8	39	0	NA	0	NA	0
CD300C	0.231701	0.876908		5	26	2	pteAle1;pteVam1	3	tarSyr2;rn6;myoDav1	1
PIGP	0.231865	0.876908		8	36	1	octDeg1	0	NA	1
CPA2	0.232078	0.876908		8	39	2	equCab2;cerSim1	9	ochPri3;camFer1;turTru2;orcOrc1;balAcu1;panHod1;bosTau8;bisBis1;capHir1	1
POLA1	0.232436	0.876908		5	33	0	NA	1	balAcu1	0
HRG	0.232536	0.876908		4	35	1	cavPor3	4	turTru2;orcOrc1;balAcu1;eptFus1	1
FAT2	0.233354	0.876908		7	28	0	NA	0	NA	0
FMO6P	0.233429	0.876908		8	40	4	cavPor3;octDeg1;equCab2;cerSim1	10	calJac3;saiBol1;tarSyr2;otoGar3;hetGla2;ochPri3;turTru2;orcOrc1;balAcu1;odoRosDiv1	2
SCGB2A2	0.234596	0.876908		6	23	1	loxAfr3	1	musFur1	1
ZWINT	0.234783	0.876908		7	33	0	NA	0	NA	0
ARHGEF10	0.234823	0.876908		5	27	0	NA	1	capHir1	0
CREG1	0.234873	0.876908		5	28	0	NA	0	NA	0
CCDC83	0.235004	0.876908		7	35	2	cavPor3;cerSim1	1	turTru2	2
SH2D4A	0.235593	0.876908		8	34	0	NA	1	vicPac2	0
FBXL21	0.235936	0.876908		8	39	1	loxAfr3	3	oryCun2;ochPri3;odoRosDiv1	1
KRTAP19_6	0.236125	0.876908		7	30	3	speTri2;cavPor3;equCab2	6	panPan1;mm10;ochPri3;camFer1;felCat8;triMan1	3
HBG1	0.236265	0.876908		5	31	2	octDeg1;equCab2	5	perManBai1;vicPac2;camFer1;turTru2;felCat8	2
IFNA7	0.236683	0.876908		5	26	1	loxAfr3	7	tarSyr2;rn6;camFer1;capHir1;musFur1;odoRosDiv1;myoLuc2	1
PTPRB	0.236705	0.876908		6	36	0	NA	0	NA	0
ZNF26	0.236893	0.876908		6	36	0	NA	1	tarSyr2	0
FFAR3	0.237588	0.876908		7	38	1	pteAle1	3	turTru2;orcOrc1;balAcu1	1
FXR1	0.237722	0.876908		7	39	0	NA	0	NA	0
SIPA1L3	0.238768	0.876908		6	24	0	NA	0	NA	0
CDHR3	0.238998	0.876908		7	35	1	cerSim1	7	rheMac3;macFas5;papAnu2;chlSab2;rhiRox1;rn6;bosTau8	1
PPP4R2	0.239481	0.876908		8	39	0	NA	1	balAcu1	0
TTC25	0.239543	0.876908		6	34	0	NA	0	NA	0
BIK	0.239691	0.876908		7	37	0	NA	0	NA	0
GTF2H3	0.239906	0.876908		5	35	1	cavPor3	1	chrAsi1	1
MLC1	0.240426	0.876908		7	31	0	NA	0	NA	0
C11orf84	0.240449	0.876908		8	39	0	NA	0	NA	0
CYP2C8	0.240598	0.876908		5	24	1	loxAfr3	2	tarSyr2;hetGla2	1
HAUS7	0.24073	0.876908		8	37	0	NA	0	NA	0
CD164L2	0.240858	0.876908		8	39	0	NA	0	NA	0
MZT2A	0.241004	0.876908		7	27	1	cerSim1	4	rhiRox1;micOch1;mm10;rn6	1
C20orf141	0.242119	0.876908		7	38	1	cavPor3	1	odoRosDiv1	1
CD74	0.24221	0.876908		8	40	0	NA	0	NA	0
SUPT16H	0.242362	0.876908		8	37	0	NA	0	NA	0
RP11_849H4.2	0.2425	0.876908		8	38	0	NA	0	NA	0
MT_ND6	0.24254	0.876908		8	31	5	speTri2;cavPor3;octDeg1;pteAle1;loxAfr3	11	rhiRox1;calJac3;tarSyr2;mm10;rn6;hetGla2;oryCun2;camFer1;capHir1;canFam3;myoLuc2	4
BAIAP3	0.242886	0.876908		7	31	1	loxAfr3	1	capHir1	1
SAMD15	0.242925	0.876908		7	35	3	speTri2;cerSim1;pteAle1	12	micOch1;rn6;nanGal1;turTru2;balAcu1;bosTau8;bisBis1;musFur1;odoRosDiv1;lepWed1;myoDav1;conCri1	3
ABCG5	0.242942	0.876908		7	35	1	loxAfr3	1	papAnu2	1
PA2G4	0.24302	0.876908		7	37	0	NA	0	NA	0
ZSWIM4	0.243631	0.876908		6	30	1	cavPor3	1	ochPri3	1
TCL1B	0.243698	0.876908		6	33	4	cavPor3;octDeg1;pteAle1;pteVam1	3	hetGla2;oryCun2;chrAsi1	2
CPO	0.243723	0.876908		8	36	3	cavPor3;equCab2;pteVam1	8	micOch1;perManBai1;mm10;rn6;nanGal1;hetGla2;orcOrc1;balAcu1	3
GTF2IRD2	0.243846	0.876908		4	21	1	cavPor3	0	NA	1
FBXW2	0.243978	0.876908		8	36	0	NA	0	NA	0
SNX32	0.243991	0.876908		8	40	4	speTri2;cavPor3;octDeg1;loxAfr3	11	hetGla2;oryCun2;ochPri3;vicPac2;panHod1;bosTau8;bisBis1;capHir1;eptFus1;myoDav1;myoLuc2	3
MBP	0.244267	0.876908		7	37	0	NA	0	NA	0
TRIP11	0.244423	0.876908		6	35	1	speTri2	0	NA	1
C14orf177	0.244648	0.876908		7	37	5	octDeg1;equCab2;cerSim1;pteAle1;loxAfr3	22	calJac3;otoGar3;perManBai1;mm10;rn6;ochPri3;camFer1;orcOrc1;balAcu1;panHod1;bosTau8;bisBis1;capHir1;felCat8;canFam3;musFur1;eptFus1;myoDav1;myoLuc2;conCri1;triMan1;chrAsi1	4
ZNF408	0.244776	0.876908		7	35	1	cavPor3	2	rn6;hetGla2	1
VSIG10L	0.245309	0.876908		4	29	2	cerSim1;pteAle1	5	panPan1;rhiRox1;panHod1;capHir1;myoDav1	2
C1orf87	0.245549	0.876908		7	32	2	cavPor3;octDeg1	3	balAcu1;felCat8;musFur1	1
RP11_569G13.3	0.245968	0.876908		6	34	6	cavPor3;octDeg1;equCab2;cerSim1;pteAle1;pteVam1	19	ponAbe2;calJac3;saiBol1;micOch1;perManBai1;mm10;rn6;nanGal1;hetGla2;vicPac2;camFer1;orcOrc1;balAcu1;felCat8;canFam3;odoRosDiv1;eptFus1;myoDav1;conCri1	3
HAO2	0.246368	0.876908		8	37	1	cavPor3	0	NA	1
PPP1CB	0.246461	0.876908		6	40	0	NA	0	NA	0
MTF1	0.24691	0.876908		7	37	0	NA	1	rhiRox1	0
IFT43	0.247422	0.876908		8	35	0	NA	0	NA	0
HIST1H2BO	0.247445	0.876908		7	30	1	loxAfr3	3	otoGar3;camFer1;myoDav1	1
AKAP14	0.247461	0.876908		6	36	0	NA	0	NA	0
NME3	0.247866	0.876908		5	24	1	cavPor3	2	hetGla2;canFam3	1
AC114494.1	0.24789	0.876908		7	38	6	speTri2;cavPor3;equCab2;cerSim1;pteAle1;pteVam1	19	chlSab2;calJac3;saiBol1;micOch1;mm10;rn6;nanGal1;hetGla2;oryCun2;orcOrc1;balAcu1;panHod1;bosTau8;bisBis1;capHir1;odoRosDiv1;eptFus1;myoDav1;myoLuc2	4
F2RL2	0.247931	0.876908		8	38	1	octDeg1	0	NA	1
AP000866.2	0.248024	0.876908		8	38	4	speTri2;octDeg1;equCab2;loxAfr3	14	calJac3;saiBol1;tarSyr2;otoGar3;micOch1;perManBai1;mm10;rn6;nanGal1;hetGla2;oryCun2;ochPri3;musFur1;eptFus1	4
CCDC85A	0.248365	0.876908		8	34	1	loxAfr3	1	triMan1	1
EPHA1	0.24843	0.876908		7	38	0	NA	0	NA	0
THAP4	0.248518	0.876908		7	34	0	NA	1	turTru2	0
AFG3L2	0.24856	0.876908		6	34	0	NA	0	NA	0
LAG3	0.248626	0.876908		8	31	0	NA	0	NA	0
TMEM56_RWDD3	0.248627	0.876908		8	35	0	NA	0	NA	0
P2RY4	0.248634	0.876908		7	35	1	cavPor3	6	calJac3;ochPri3;turTru2;orcOrc1;panHod1;canFam3	1
KANSL2	0.248654	0.876908		7	35	0	NA	0	NA	0
RFWD2	0.24937	0.876908		5	37	0	NA	0	NA	0
ERO1LB	0.249402	0.876908		8	31	1	cavPor3	0	NA	1
NKAP	0.249655	0.876908		6	29	0	NA	0	NA	0
OSGIN2	0.249979	0.876908		8	40	0	NA	0	NA	0
SLCO1B3	0.250227	0.876908		5	34	0	NA	0	NA	0
RP11_20I23.1	0.250275	0.876908		8	38	0	NA	1	chlSab2	0
PNN	0.250294	0.876908		6	37	1	speTri2	1	turTru2	1
CYP2E1	0.250976	0.876908		7	28	2	pteAle1;loxAfr3	2	hetGla2;chrAsi1	2
SPAG8	0.250995	0.876908		8	38	1	equCab2	1	oryCun2	1
TTF1	0.25106	0.876908		6	35	1	speTri2	1	balAcu1	1
CD80	0.251116	0.876908		8	37	0	NA	0	NA	0
AARS2	0.251381	0.876908		7	36	0	NA	0	NA	0
SLC45A4	0.251405	0.876908		7	30	0	NA	0	NA	0
LAD1	0.251506	0.876908		7	32	1	octDeg1	2	micOch1;perManBai1	1
DNAH9	0.251579	0.876908		4	29	0	NA	1	oryCun2	0
LIG3	0.251813	0.876908		7	39	0	NA	0	NA	0
COL24A1	0.252379	0.876908		5	26	0	NA	1	myoDav1	0
PCNT	0.25257	0.876908		7	35	3	speTri2;cavPor3;equCab2	14	panTro4;otoGar3;micOch1;perManBai1;mm10;rn6;nanGal1;vicPac2;camFer1;orcOrc1;balAcu1;canFam3;musFur1;odoRosDiv1	3
BAD	0.252823	0.876908		8	34	0	NA	0	NA	0
VIT	0.252938	0.876908		7	37	0	NA	0	NA	0
ZNF222	0.253055	0.876908		5	24	2	octDeg1;loxAfr3	7	micOch1;perManBai1;nanGal1;orcOrc1;balAcu1;bosTau8;conCri1	2
KLHL4	0.253158	0.876908		6	22	0	NA	0	NA	0
TMC6	0.253223	0.876908		7	32	0	NA	2	camFer1;myoDav1	0
ZNF358	0.25346	0.876908		5	29	0	NA	1	myoDav1	0
PZP	0.253818	0.876908		6	23	5	octDeg1;equCab2;pteAle1;pteVam1;loxAfr3	6	mm10;canFam3;musFur1;odoRosDiv1;lepWed1;triMan1	4
TIMD4	0.253914	0.876908		6	36	1	loxAfr3	0	NA	1
C20orf173	0.2541	0.876908		8	40	4	speTri2;cavPor3;octDeg1;loxAfr3	7	micOch1;nanGal1;hetGla2;oryCun2;ochPri3;musFur1;conCri1	3
REG4	0.254203	0.876908		6	36	1	equCab2	3	otoGar3;balAcu1;triMan1	1
SRC	0.25504	0.876908		7	38	0	NA	0	NA	0
RAB40B	0.255209	0.876908		8	35	1	speTri2	1	camFer1	1
C6	0.255246	0.876908		6	35	1	octDeg1	1	vicPac2	1
POU2F3	0.255417	0.876908		7	37	0	NA	0	NA	0
C6orf58	0.255496	0.876908		6	34	1	cerSim1	5	papAnu2;mm10;bosTau8;capHir1;triMan1	1
GAB3	0.255622	0.876908		7	30	0	NA	0	NA	0
GRID2IP	0.256068	0.876908		5	24	0	NA	1	turTru2	0
ADH1B	0.256099	0.876908		4	25	1	cavPor3	0	NA	1
URGCP_MRPS24	0.256334	0.876908		6	33	1	speTri2	5	calJac3;saiBol1;turTru2;orcOrc1;balAcu1	1
NLRP8	0.256605	0.876908		6	28	4	cavPor3;equCab2;pteAle1;pteVam1	5	otoGar3;hetGla2;vicPac2;camFer1;capHir1	3
CCDC82	0.256855	0.876908		7	37	0	NA	0	NA	0
EIF3A	0.256896	0.876908		8	34	1	pteAle1	1	myoLuc2	1
GPATCH1	0.256923	0.876908		7	31	2	cavPor3;octDeg1	1	hetGla2	1
MT_ND5	0.257056	0.876908		8	30	3	speTri2;pteAle1;pteVam1	3	rhiRox1;calJac3;myoLuc2	2
RNF32	0.257518	0.876908		8	34	0	NA	0	NA	0
TMOD1	0.25752	0.876908		7	38	0	NA	0	NA	0
MAGEB10	0.257815	0.876908		6	26	3	speTri2;cavPor3;octDeg1	6	micOch1;perManBai1;mm10;nanGal1;hetGla2;vicPac2	2
NAV3	0.257874	0.876908		6	30	1	pteAle1	1	rn6	1
COX6B2	0.257916	0.876908		6	26	1	cavPor3	0	NA	1
PHYH	0.258074	0.876908		7	32	0	NA	1	papAnu2	0
SCLY	0.25835	0.876908		6	33	0	NA	0	NA	0
UGT2B11	0.258415	0.876908		6	29	4	octDeg1;equCab2;cerSim1;pteAle1	9	rheMac3;rhiRox1;tarSyr2;hetGla2;turTru2;panHod1;bisBis1;felCat8;myoLuc2	3
SPRR2A	0.258774	0.876908		7	32	2	pteVam1;loxAfr3	1	chrAsi1	2
IL36RN	0.258939	0.876908		7	39	1	pteVam1	0	NA	1
KRTAP21_1	0.259882	0.876908		8	33	1	cavPor3	1	turTru2	1
PDCD1	0.259975	0.876908		5	29	0	NA	0	NA	0
TIMM21	0.260003	0.876908		8	37	0	NA	0	NA	0
GRIP2	0.260648	0.876908		5	30	0	NA	0	NA	0
PLCZ1	0.260971	0.876908		8	36	6	speTri2;octDeg1;equCab2;pteAle1;pteVam1;loxAfr3	13	otoGar3;micOch1;perManBai1;mm10;rn6;nanGal1;hetGla2;oryCun2;bosTau8;bisBis1;capHir1;eptFus1;triMan1	5
PLRG1	0.260998	0.876908		7	40	0	NA	0	NA	0
CD33	0.261331	0.876908		4	24	0	NA	1	camFer1	0
TMEM257	0.26134	0.876908		6	36	4	speTri2;octDeg1;cerSim1;pteAle1	22	tarSyr2;micOch1;perManBai1;mm10;rn6;hetGla2;oryCun2;ochPri3;camFer1;turTru2;orcOrc1;balAcu1;panHod1;bosTau8;bisBis1;capHir1;canFam3;musFur1;odoRosDiv1;eptFus1;myoDav1;myoLuc2	4
IGLV5_48	0.261447	0.876908		4	25	1	speTri2	6	oryCun2;ochPri3;musFur1;lepWed1;triMan1;chrAsi1	1
C11orf44	0.261953	0.876908		6	36	6	speTri2;cavPor3;octDeg1;equCab2;cerSim1;pteAle1	26	rheMac3;macFas5;papAnu2;calJac3;saiBol1;tarSyr2;otoGar3;micOch1;mm10;rn6;nanGal1;hetGla2;oryCun2;ochPri3;vicPac2;camFer1;orcOrc1;balAcu1;panHod1;capHir1;felCat8;canFam3;musFur1;myoDav1;myoLuc2;conCri1	4
CD1D	0.261974	0.876908		5	28	1	pteAle1	2	nanGal1;lepWed1	1
PRAMEF11	0.262073	0.876908		6	24	2	pteAle1;pteVam1	5	ponAbe2;vicPac2;canFam3;musFur1;odoRosDiv1	1
DEFB115	0.262263	0.876908		5	30	1	pteAle1	2	nanGal1;odoRosDiv1	1
HNRNPH3	0.262322	0.876908		7	39	1	octDeg1	1	panHod1	1
ENPEP	0.262452	0.876908		7	35	0	NA	1	myoDav1	0
DTX3L	0.262491	0.876908		7	35	1	loxAfr3	1	chlSab2	1
ZNF85	0.26284	0.876908		6	24	1	cerSim1	3	panPan1;capHir1;musFur1	1
SCML1	0.263349	0.876908		8	35	0	NA	2	tarSyr2;nanGal1	0
ERICH4	0.263501	0.876908		6	34	0	NA	0	NA	0
TNXB	0.263547	0.876908		5	24	2	octDeg1;pteAle1	11	perManBai1;mm10;nanGal1;camFer1;turTru2;orcOrc1;panHod1;capHir1;myoDav1;conCri1;chrAsi1	2
KDM6B	0.263877	0.876908		6	26	0	NA	1	panPan1	0
KIAA0922	0.263975	0.876908		6	30	0	NA	0	NA	0
ZNF530	0.264014	0.876908		5	24	5	speTri2;cavPor3;equCab2;pteAle1;loxAfr3	12	saiBol1;perManBai1;mm10;rn6;ochPri3;vicPac2;camFer1;turTru2;orcOrc1;balAcu1;felCat8;triMan1	5
PM20D1	0.264151	0.876908		6	37	0	NA	2	calJac3;saiBol1	0
ZNF185	0.264589	0.876908		6	32	1	speTri2	1	rn6	1
GPATCH4	0.264795	0.876908		6	40	0	NA	0	NA	0
HJURP	0.265124	0.876908		8	40	0	NA	0	NA	0
FAM65A	0.265398	0.876908		7	33	6	cavPor3;octDeg1;equCab2;cerSim1;pteAle1;loxAfr3	18	panPan1;otoGar3;nanGal1;ochPri3;camFer1;turTru2;orcOrc1;balAcu1;capHir1;canFam3;musFur1;odoRosDiv1;lepWed1;eptFus1;myoDav1;myoLuc2;conCri1;triMan1	4
HTR3C	0.265824	0.876908		8	33	5	speTri2;cavPor3;equCab2;cerSim1;pteVam1	14	papAnu2;chlSab2;perManBai1;mm10;rn6;hetGla2;orcOrc1;balAcu1;panHod1;bosTau8;bisBis1;capHir1;odoRosDiv1;lepWed1	4
SLAMF1	0.266115	0.876908		8	36	0	NA	0	NA	0
FANK1	0.266217	0.876908		8	37	0	NA	0	NA	0
MAP4	0.266444	0.876908		8	36	0	NA	7	panTro4;balAcu1;panHod1;bosTau8;bisBis1;capHir1;myoDav1	0
MYOF	0.26709	0.876908		4	33	0	NA	1	papAnu2	0
LGALS7	0.267281	0.876908		5	22	0	NA	0	NA	0
DNMT3B	0.267402	0.876908		6	39	0	NA	0	NA	0
PPAPDC1A	0.267597	0.876908		7	36	0	NA	0	NA	0
UBAP1	0.267728	0.876908		8	38	0	NA	0	NA	0
SAG	0.26798	0.876908		7	35	0	NA	0	NA	0
CPA3	0.268374	0.876908		8	39	3	equCab2;pteAle1;pteVam1	4	oryCun2;camFer1;turTru2;eptFus1	2
WFDC13	0.268477	0.876908		8	36	1	pteAle1	1	ochPri3	1
ADNP2	0.268536	0.876908		6	35	0	NA	0	NA	0
HLA_DMB	0.268597	0.876908		5	37	0	NA	0	NA	0
IFI44	0.269321	0.876908		7	35	3	cavPor3;octDeg1;pteAle1	6	saiBol1;otoGar3;hetGla2;odoRosDiv1;lepWed1;chrAsi1	2
PIGR	0.269607	0.876908		8	39	0	NA	0	NA	0
CD83	0.270365	0.876908		7	36	0	NA	0	NA	0
C3orf38	0.270463	0.876908		7	38	0	NA	0	NA	0
RHPN2	0.270562	0.876908		6	36	0	NA	1	tarSyr2	0
FXYD4	0.270832	0.876908		7	38	0	NA	0	NA	0
TRIM34	0.270851	0.876908		6	35	1	pteAle1	2	balAcu1;chrAsi1	1
CTD_2528L19.4	0.271004	0.876908		4	23	1	pteVam1	2	tarSyr2;rn6	1
LRRC71	0.271107	0.876908		4	29	0	NA	0	NA	0
IDNK	0.271206	0.876908		7	37	0	NA	0	NA	0
ZNF790	0.271221	0.876908		4	29	3	cavPor3;cerSim1;pteAle1	7	turTru2;bisBis1;capHir1;eptFus1;myoLuc2;conCri1;triMan1	3
PPP2R2A	0.271502	0.876908		8	38	0	NA	0	NA	0
FBXL22	0.271734	0.876908		6	34	5	speTri2;cerSim1;pteAle1;pteVam1;loxAfr3	20	rheMac3;macFas5;papAnu2;tarSyr2;micOch1;perManBai1;hetGla2;ochPri3;vicPac2;camFer1;balAcu1;panHod1;bosTau8;bisBis1;capHir1;canFam3;musFur1;odoRosDiv1;lepWed1;triMan1	4
SLC43A1	0.272075	0.876908		8	34	1	speTri2	0	NA	1
CKAP2	0.272077	0.876908		7	35	0	NA	0	NA	0
POM121	0.272151	0.876908		8	32	1	speTri2	0	NA	1
CTH	0.272193	0.876908		7	34	0	NA	0	NA	0
SLC22A16	0.272294	0.876908		5	31	1	octDeg1	1	perManBai1	1
AP4B1	0.272322	0.876908		8	39	0	NA	0	NA	0
SMIM21	0.272834	0.876908		7	39	5	speTri2;cavPor3;octDeg1;equCab2;cerSim1	21	papAnu2;calJac3;saiBol1;otoGar3;micOch1;mm10;nanGal1;hetGla2;oryCun2;ochPri3;vicPac2;camFer1;turTru2;orcOrc1;balAcu1;panHod1;bosTau8;bisBis1;capHir1;canFam3;odoRosDiv1	3
ZSCAN18	0.272988	0.876908		5	34	2	equCab2;cerSim1	6	nanGal1;hetGla2;turTru2;orcOrc1;balAcu1;capHir1	1
RNF213	0.273188	0.876908		7	24	0	NA	2	calJac3;balAcu1	0
RAB36	0.273464	0.876908		7	38	0	NA	0	NA	0
RP11_322N21.2	0.273824	0.876908		8	40	0	NA	0	NA	0
PAX4	0.274002	0.876908		7	38	0	NA	0	NA	0
MRGPRD	0.27411	0.876908		7	34	1	pteAle1	5	turTru2;orcOrc1;panHod1;felCat8;lepWed1	1
PARP3	0.27416	0.876908		8	38	3	cerSim1;pteAle1;pteVam1	6	vicPac2;camFer1;bosTau8;bisBis1;lepWed1;triMan1	2
LRP2	0.274396	0.876908		7	30	0	NA	0	NA	0
ZNF785	0.274612	0.876908		7	29	6	speTri2;cavPor3;octDeg1;equCab2;pteAle1;pteVam1	8	rhiRox1;otoGar3;hetGla2;orcOrc1;felCat8;eptFus1;myoDav1;myoLuc2	4
USP28	0.274674	0.876908		6	36	0	NA	0	NA	0
FAM216A	0.274872	0.876908		7	37	1	pteAle1	1	nanGal1	1
FOXD4L3	0.274925	0.876908		7	25	0	NA	1	turTru2	0
FOXD4L6	0.274925	0.876908		7	25	0	NA	1	turTru2	0
CCDC122	0.275119	0.876908		7	39	1	speTri2	0	NA	1
ERCC6	0.275341	0.876908		8	36	1	equCab2	0	NA	1
GPR75	0.275492	0.876908		8	38	1	octDeg1	1	canFam3	1
GFRA4	0.275511	0.876908		4	22	1	speTri2	0	NA	1
PSMB11	0.275541	0.876908		8	39	0	NA	0	NA	0
MAGEB16	0.276267	0.876908		7	28	3	cavPor3;octDeg1;pteAle1	7	rheMac3;macFas5;chlSab2;saiBol1;tarSyr2;otoGar3;hetGla2	2
DDX43	0.276495	0.876908		7	34	0	NA	0	NA	0
ZNF429	0.27651	0.876908		5	22	1	cavPor3	6	papAnu2;saiBol1;vicPac2;bosTau8;canFam3;musFur1	1
PPP3CB	0.276597	0.876908		6	36	0	NA	0	NA	0
RBFA	0.277037	0.876908		7	37	0	NA	1	ochPri3	0
IRF7	0.277066	0.876908		6	32	3	speTri2;pteAle1;pteVam1	13	perManBai1;mm10;nanGal1;hetGla2;ochPri3;turTru2;orcOrc1;balAcu1;panHod1;bosTau8;bisBis1;musFur1;eptFus1	2
ZBTB48	0.277318	0.876908		7	36	1	pteAle1	1	turTru2	1
LONP2	0.27776	0.876908		7	35	0	NA	0	NA	0
MPV17L2	0.277891	0.876908		8	36	0	NA	0	NA	0
PCSK1N	0.278128	0.876908		6	27	0	NA	1	panPan1	0
ZNF2	0.278364	0.876908		8	40	0	NA	0	NA	0
IL13	0.278444	0.876908		8	40	0	NA	0	NA	0
ICA1	0.278479	0.876908		6	36	0	NA	0	NA	0
NBN	0.278663	0.876908		5	35	0	NA	0	NA	0
MT1A	0.279141	0.876908		5	24	1	cavPor3	3	tarSyr2;nanGal1;myoDav1	1
KRTAP12_3	0.279427	0.876908		8	37	1	cavPor3	1	otoGar3	1
CCNO	0.279592	0.876908		8	36	0	NA	0	NA	0
TMPRSS13	0.2796	0.876908		8	38	0	NA	0	NA	0
RP11_156P1.2	0.279746	0.876908		6	35	0	NA	0	NA	0
HYAL2	0.280171	0.876908		8	40	0	NA	0	NA	0
TMEM123	0.280297	0.876908		7	37	0	NA	0	NA	0
A2M	0.280412	0.876908		5	35	1	equCab2	0	NA	1
TEX11	0.280459	0.876908		6	26	2	cavPor3;loxAfr3	2	hetGla2;chrAsi1	2
QRFPR	0.280718	0.876908		6	37	1	pteAle1	3	orcOrc1;balAcu1;myoDav1	1
PDE1A	0.28095	0.876908		7	34	0	NA	0	NA	0
RNASE9	0.280953	0.876908		6	37	1	pteAle1	5	turTru2;orcOrc1;balAcu1;musFur1;chrAsi1	1
CAPNS1	0.280968	0.876908		7	30	0	NA	0	NA	0
ARHGEF35	0.281221	0.876908		6	30	0	NA	0	NA	0
NUP98	0.281255	0.876908		7	32	1	equCab2	0	NA	1
KIAA1671	0.281379	0.876908		6	33	0	NA	0	NA	0
FEV	0.282344	0.876908		4	22	0	NA	1	camFer1	0
LGALS3	0.282609	0.876908		6	39	0	NA	0	NA	0
TNP2	0.282665	0.876908		8	38	1	octDeg1	3	turTru2;orcOrc1;balAcu1	1
RAB44	0.283187	0.876908		7	33	6	speTri2;cavPor3;equCab2;cerSim1;pteAle1;loxAfr3	19	saiBol1;tarSyr2;otoGar3;micOch1;perManBai1;mm10;rn6;nanGal1;hetGla2;vicPac2;turTru2;orcOrc1;balAcu1;panHod1;capHir1;musFur1;odoRosDiv1;myoDav1;triMan1	5
LRRC8C	0.283307	0.876908		7	38	0	NA	0	NA	0
INADL	0.283441	0.876908		6	28	0	NA	0	NA	0
LRRC15	0.283457	0.876908		8	40	0	NA	0	NA	0
ANKRD49	0.283505	0.876908		7	38	1	octDeg1	0	NA	1
LSP1	0.283609	0.876908		7	30	0	NA	2	ponAbe2;otoGar3	0
LAIR1	0.283634	0.876908		7	26	1	cerSim1	2	rn6;vicPac2	1
ZNF266	0.283668	0.876908		5	29	2	cavPor3;octDeg1	9	perManBai1;mm10;camFer1;turTru2;orcOrc1;bosTau8;bisBis1;myoDav1;myoLuc2	1
ANKRD27	0.283787	0.876908		7	33	1	pteAle1	1	ponAbe2	1
GBP1	0.284106	0.876908		7	24	0	NA	0	NA	0
ADM	0.28422	0.876908		8	38	0	NA	0	NA	0
RFX4	0.284229	0.876908		8	37	0	NA	0	NA	0
ZNF768	0.284346	0.876908		7	35	0	NA	0	NA	0
ERCC6L2	0.284633	0.876908		5	35	0	NA	0	NA	0
ZNF786	0.285212	0.876908		6	31	2	octDeg1;equCab2	3	hetGla2;triMan1;chrAsi1	2
TATDN1	0.285415	0.876908		8	39	0	NA	0	NA	0
C2orf66	0.285462	0.876908		8	37	1	loxAfr3	4	calJac3;otoGar3;felCat8;conCri1	1
FOXD4L4	0.28578	0.876908		7	25	0	NA	1	turTru2	0
ZBTB49	0.285829	0.876908		8	36	0	NA	0	NA	0
SCAPER	0.285843	0.876908		7	32	0	NA	0	NA	0
PDLIM2	0.285922	0.876908		8	29	1	cerSim1	3	turTru2;musFur1;chrAsi1	1
SLC25A51	0.286317	0.876908		8	36	1	speTri2	1	papAnu2	1
SLC25A4	0.286591	0.876908		7	38	0	NA	0	NA	0
KRTAP4_4	0.287421	0.876908		6	24	1	cerSim1	2	panPan1;balAcu1	1
MYBPC2	0.287572	0.876908		5	27	1	loxAfr3	0	NA	1
ANKRD12	0.288314	0.876908		8	37	1	loxAfr3	4	panPan1;perManBai1;vicPac2;turTru2	1
GRN	0.28845	0.876908		8	36	0	NA	0	NA	0
MYBPHL	0.288684	0.876908		8	38	2	cerSim1;loxAfr3	6	vicPac2;turTru2;orcOrc1;balAcu1;odoRosDiv1;triMan1	2
SPX	0.288763	0.876908		8	32	1	pteAle1	1	bisBis1	1
TTC32	0.288783	0.876908		8	36	0	NA	0	NA	0
MRGPRG	0.289327	0.876908		6	26	2	equCab2;cerSim1	0	NA	1
CASC1	0.289573	0.876908		8	32	0	NA	0	NA	0
RP11_934B9.3	0.289596	0.876908		7	40	4	octDeg1;equCab2;cerSim1;loxAfr3	7	papAnu2;calJac3;nanGal1;hetGla2;camFer1;musFur1;chrAsi1	3
TACR2	0.290203	0.876908		8	38	0	NA	0	NA	0
CCZ1B	0.290481	0.876908		8	35	0	NA	0	NA	0
HSH2D	0.290508	0.876908		7	36	3	octDeg1;pteAle1;pteVam1	3	otoGar3;hetGla2;musFur1	2
EMB	0.29065	0.876908		7	37	1	loxAfr3	1	triMan1	1
PHLDB2	0.29069	0.876908		7	35	0	NA	0	NA	0
DEFB112	0.290803	0.876908		5	32	2	octDeg1;pteAle1	4	tarSyr2;perManBai1;mm10;hetGla2	2
LMNTD2	0.290854	0.876908		8	27	2	equCab2;loxAfr3	4	nanGal1;panHod1;capHir1;eptFus1	2
COL3A1	0.291022	0.876908		7	37	0	NA	0	NA	0
PRSS46	0.291083	0.876908		8	39	1	octDeg1	2	turTru2;orcOrc1	1
C1orf159	0.291432	0.876908		8	32	2	pteAle1;pteVam1	0	NA	1
JMJD1C	0.291524	0.876908		6	38	0	NA	0	NA	0
GPR97	0.291563	0.876908		6	33	0	NA	0	NA	0
EFTUD2	0.291728	0.876908		7	36	0	NA	0	NA	0
SLPI	0.292288	0.876908		7	35	0	NA	1	oryCun2	0
KISS1	0.292433	0.876908		8	30	2	pteAle1;pteVam1	3	papAnu2;canFam3;eptFus1	1
ABTB2	0.29251	0.876908		5	33	0	NA	0	NA	0
CFAP70	0.292809	0.876908		5	36	5	cavPor3;octDeg1;equCab2;cerSim1;pteAle1	19	tarSyr2;perManBai1;mm10;rn6;nanGal1;hetGla2;oryCun2;ochPri3;turTru2;orcOrc1;panHod1;bosTau8;felCat8;canFam3;odoRosDiv1;lepWed1;eptFus1;myoLuc2;conCri1	3
KRTAP22_2	0.293225	0.876908		8	34	1	equCab2	2	ponAbe2;felCat8	1
ATXN7L3	0.293647	0.876908		7	37	1	pteAle1	1	turTru2	1
DNAH11	0.294007	0.876908		7	28	6	cavPor3;octDeg1;equCab2;cerSim1;pteAle1;pteVam1	13	otoGar3;rn6;hetGla2;vicPac2;orcOrc1;balAcu1;felCat8;canFam3;musFur1;odoRosDiv1;eptFus1;myoDav1;conCri1	3
DNAJC28	0.294321	0.876908		7	39	0	NA	0	NA	0
RBAK_RBAKDN	0.294457	0.876908		6	32	0	NA	0	NA	0
GIF	0.294557	0.876908		8	36	0	NA	0	NA	0
ZNF793	0.29477	0.876908		6	29	0	NA	2	perManBai1;ochPri3	0
C17orf61_PLSCR3	0.295102	0.876908		8	38	0	NA	0	NA	0
PRAC2	0.2956	0.876908		6	37	3	octDeg1;cerSim1;pteAle1	20	rheMac3;macFas5;papAnu2;chlSab2;rhiRox1;calJac3;otoGar3;perManBai1;mm10;hetGla2;oryCun2;ochPri3;turTru2;orcOrc1;bosTau8;bisBis1;canFam3;odoRosDiv1;lepWed1;conCri1	3
TIMM13	0.295755	0.876908		7	33	1	cavPor3	1	balAcu1	1
MTHFD2L	0.295865	0.876908		7	34	1	cavPor3	2	nanGal1;ochPri3	1
F9	0.296117	0.876908		7	39	0	NA	0	NA	0
CHMP7	0.296162	0.876908		6	37	0	NA	0	NA	0
KIF12	0.296255	0.876908		7	39	0	NA	0	NA	0
MCOLN1	0.296367	0.876908		8	36	1	equCab2	1	camFer1	1
EPHB6	0.296626	0.876908		4	31	1	pteVam1	1	papAnu2	1
TOB1	0.296659	0.876908		8	39	0	NA	0	NA	0
POLD3	0.296667	0.876908		7	38	0	NA	0	NA	0
AGAP1	0.296697	0.876908		7	29	0	NA	1	panHod1	0
LUZP2	0.29688	0.876908		6	30	0	NA	1	ponAbe2	0
PREX1	0.296987	0.876908		5	32	1	equCab2	1	capHir1	1
WNK3	0.297136	0.876908		7	32	0	NA	0	NA	0
ZNF563	0.297152	0.876908		4	21	2	cerSim1;pteAle1	4	vicPac2;turTru2;orcOrc1;bisBis1	2
PARM1	0.297725	0.876908		7	34	0	NA	0	NA	0
RFX2	0.297733	0.876908		5	33	0	NA	0	NA	0
WWC2	0.297745	0.876908		6	34	0	NA	0	NA	0
CEP104	0.297963	0.876908		6	31	0	NA	0	NA	0
BTN2A2	0.298099	0.876908		6	31	4	speTri2;cavPor3;equCab2;cerSim1	4	hetGla2;camFer1;canFam3;odoRosDiv1	3
MALRD1	0.298154	0.876908		6	23	1	pteAle1	4	panTro4;oryCun2;ochPri3;canFam3	1
IRS4	0.298802	0.876908		5	21	1	loxAfr3	1	turTru2	1
UBD	0.299109	0.876908		6	26	2	cavPor3;octDeg1	1	felCat8	1
FZD10	0.299202	0.876908		4	24	0	NA	0	NA	0
GJB7	0.299553	0.876908		8	37	2	speTri2;cavPor3	7	ponAbe2;papAnu2;rhiRox1;otoGar3;perManBai1;mm10;ochPri3	2
C1QTNF3_AMACR	0.299786	0.876908		6	37	0	NA	0	NA	0
ZNF649	0.30011	0.876908		6	23	3	cavPor3;pteAle1;loxAfr3	11	rheMac3;macFas5;papAnu2;chlSab2;rhiRox1;tarSyr2;mm10;oryCun2;odoRosDiv1;lepWed1;myoDav1	3
RP11_644F5.10	0.300618	0.876908		7	35	0	NA	0	NA	0
PLAUR	0.300698	0.876908		7	37	0	NA	0	NA	0
STK19	0.300845	0.876908		8	35	0	NA	0	NA	0
CCDC28A	0.300957	0.876908		5	40	0	NA	0	NA	0
WWP1	0.301023	0.876908		7	30	0	NA	0	NA	0
TMPRSS7	0.301498	0.876908		6	35	0	NA	1	papAnu2	0
HIST1H3D	0.301729	0.876908		7	31	1	cavPor3	1	otoGar3	1
ZNF443	0.302063	0.876908		4	22	3	equCab2;pteAle1;loxAfr3	17	panPan1;papAnu2;chlSab2;calJac3;perManBai1;mm10;nanGal1;camFer1;orcOrc1;balAcu1;panHod1;bosTau8;felCat8;canFam3;odoRosDiv1;lepWed1;myoDav1	3
USP24	0.302094	0.876908		6	35	1	pteAle1	1	panHod1	1
UGT2B17	0.302154	0.876908		5	23	2	cerSim1;loxAfr3	5	tarSyr2;hetGla2;oryCun2;vicPac2;turTru2	2
CYP4A22	0.302228	0.876908		6	21	2	cerSim1;loxAfr3	3	capHir1;felCat8;myoDav1	2
C17orf53	0.302529	0.876908		7	39	1	cavPor3	0	NA	1
TMEM52	0.302538	0.876908		6	36	0	NA	0	NA	0
DEFB113	0.302582	0.876908		7	34	0	NA	0	NA	0
VWDE	0.302619	0.876908		7	35	4	cerSim1;pteAle1;pteVam1;loxAfr3	11	panPan1;oryCun2;orcOrc1;balAcu1;panHod1;bosTau8;bisBis1;capHir1;myoLuc2;conCri1;triMan1	3
BLOC1S1	0.302721	0.876908		7	35	0	NA	0	NA	0
REPIN1	0.30309	0.876908		8	26	0	NA	0	NA	0
ARHGEF5	0.303246	0.876908		6	37	0	NA	1	rn6	0
DEFB118	0.30327	0.876908		8	36	1	speTri2	1	felCat8	1
AHCTF1	0.303347	0.876908		7	36	0	NA	0	NA	0
MMP26	0.303438	0.876908		4	24	1	pteAle1	2	mm10;myoLuc2	1
IL31RA	0.303438	0.876908		8	35	0	NA	0	NA	0
ENOSF1	0.30362	0.876908		6	35	1	pteAle1	2	rn6;myoDav1	1
CELSR3	0.303625	0.876908		4	27	1	loxAfr3	2	camFer1;turTru2	1
L1TD1	0.303831	0.876908		4	31	2	cerSim1;pteAle1	14	rheMac3;macFas5;papAnu2;chlSab2;calJac3;saiBol1;nanGal1;oryCun2;ochPri3;vicPac2;camFer1;balAcu1;bisBis1;myoDav1	2
ZNF41	0.304432	0.876908		4	33	1	octDeg1	3	papAnu2;mm10;chrAsi1	1
TPSG1	0.304614	0.876908		6	29	4	speTri2;cavPor3;octDeg1;loxAfr3	5	tarSyr2;hetGla2;ochPri3;canFam3;odoRosDiv1	3
TLE6	0.30492	0.876908		6	33	1	pteAle1	0	NA	1
RP1L1	0.305181	0.876908		5	26	4	cavPor3;equCab2;cerSim1;pteAle1	14	rheMac3;macFas5;papAnu2;chlSab2;rhiRox1;calJac3;mm10;hetGla2;oryCun2;turTru2;orcOrc1;balAcu1;myoDav1;myoLuc2	3
FCER2	0.305208	0.876908		7	29	0	NA	0	NA	0
ARL13A	0.305209	0.876908		6	34	2	cavPor3;octDeg1	1	canFam3	1
TAS2R31	0.30524	0.876908		5	31	3	octDeg1;equCab2;loxAfr3	9	tarSyr2;perManBai1;mm10;vicPac2;panHod1;bisBis1;capHir1;lepWed1;triMan1	3
KRT8	0.305474	0.876908		6	33	2	speTri2;cerSim1	12	mm10;rn6;hetGla2;oryCun2;ochPri3;camFer1;turTru2;orcOrc1;balAcu1;musFur1;eptFus1;myoDav1	2
GS1_259H13.10	0.305719	0.876908		6	31	6	speTri2;cavPor3;octDeg1;equCab2;cerSim1;pteAle1	26	rheMac3;macFas5;papAnu2;chlSab2;rhiRox1;saiBol1;tarSyr2;otoGar3;mm10;nanGal1;ochPri3;camFer1;turTru2;orcOrc1;balAcu1;panHod1;bosTau8;bisBis1;capHir1;felCat8;canFam3;musFur1;odoRosDiv1;lepWed1;eptFus1;myoLuc2	4
TMEM155	0.305829	0.876908		8	37	7	speTri2;octDeg1;equCab2;cerSim1;pteAle1;pteVam1;loxAfr3	21	otoGar3;micOch1;perManBai1;rn6;nanGal1;hetGla2;oryCun2;vicPac2;camFer1;orcOrc1;panHod1;bisBis1;capHir1;canFam3;musFur1;odoRosDiv1;lepWed1;eptFus1;myoDav1;conCri1;triMan1	5
C8orf22	0.306107	0.876908		7	29	1	loxAfr3	1	conCri1	1
LILRA1	0.306172	0.876908		6	24	4	cavPor3;octDeg1;equCab2;pteAle1	8	rheMac3;chlSab2;tarSyr2;micOch1;perManBai1;rn6;oryCun2;balAcu1	3
SCN10A	0.306262	0.876908		6	33	0	NA	0	NA	0
DEFB107A	0.306279	0.876908		5	28	0	NA	1	nanGal1	0
DEFB107B	0.306279	0.876908		5	28	0	NA	1	nanGal1	0
PSMC3	0.306474	0.876908		8	37	0	NA	0	NA	0
JAK1	0.306583	0.876908		7	34	0	NA	0	NA	0
HIST1H3H	0.306601	0.876908		7	29	1	equCab2	3	otoGar3;micOch1;rn6	1
TBC1D8	0.306614	0.876908		8	32	1	cavPor3	0	NA	1
ZFP2	0.306823	0.876908		7	40	1	loxAfr3	2	turTru2;chrAsi1	1
RBM25	0.306913	0.876908		7	35	0	NA	1	rn6	0
SPINK2	0.307062	0.876908		7	31	0	NA	0	NA	0
XXbac_BPG32J3.20	0.307552	0.876908		8	38	2	pteAle1;pteVam1	2	chlSab2;orcOrc1	1
LILRA5	0.307775	0.876908		7	23	4	speTri2;cavPor3;equCab2;loxAfr3	6	rheMac3;calJac3;rn6;capHir1;canFam3;musFur1	4
TMEM217	0.308223	0.876908		8	37	0	NA	0	NA	0
SLC25A33	0.308232	0.876908		6	34	0	NA	0	NA	0
BAG6	0.308543	0.876908		7	37	0	NA	0	NA	0
MS4A3	0.308576	0.876908		7	35	4	cavPor3;octDeg1;pteAle1;loxAfr3	6	hetGla2;ochPri3;balAcu1;panHod1;myoDav1;myoLuc2	3
RNF2	0.308682	0.876908		7	37	0	NA	0	NA	0
VHL	0.308775	0.876908		6	32	0	NA	0	NA	0
CD300LB	0.308891	0.876908		6	36	0	NA	0	NA	0
[truncated: 11,287 more rows]
