# Supplementary material for: Vision-related convergent gene losses reveal SERPINE3’s unknown role in the eye
Source: eLife. 2022 Jun 21;11:e77999. doi: 10.7554/eLife.77999 (PMC9355568; doi:10.7554/eLife.77999)
Supplement: Figure 1—source data 5. [file elife-77999-fig1-data5.xls]

## Sheet: Figure 1 - Source data 5
Figure 1 - Source data 5: List of candidate genes of the forward genomics screen based on a visual acuity threshold < 1.5
For comparison, we also tested a less stringent visual acuity cutoff (va <1.5) for defining the phenotype and rerun the screen with otherwise identical conditions. All seven genes that passed the filtered were also retrieved with the treshold va < 1.
SERPINE3 was retrieved as the 1st-ranked candidate in this screen.
Gene symbol	P-value in Forward Genomics screen	Corrected P-value	Filter: P-value in Forward Genomics screen < 0.05	#Low-acuity species	#High-acuity species	#Losses in low-acuity species	Low-acuity species that have lost the gene	#Losses in high-acuity species	High-acuity species with losses	#Losses in low-acuity lineages	Filter: Loss > 2 low-acuity lineages
SERPINE3	3.47187e-08	0.000410362	YES	13	31	7	nanGal1;hetGla2;eptFus1;myoDav1;myoLuc2;conCri1;chrAsi1	0	NA	5	YES
USP54	6.24315e-08	0.000410362	YES	14	29	0	NA	0	NA	0	NO
SAPCD1	1.55243e-07	0.000680274	YES	14	33	7	nanGal1;hetGla2;eptFus1;myoDav1;myoLuc2;conCri1;chrAsi1	0	NA	5	YES
SGK494	9.70442e-06	0.0318936	YES	14	33	4	nanGal1;hetGla2;conCri1;chrAsi1	0	NA	4	YES
GUCA1B	1.51467e-05	0.0331865	YES	12	30	3	hetGla2;conCri1;chrAsi1	0	NA	3	YES
OPTC	1.49375e-05	0.0331865	YES	14	29	6	eptFus1;myoDav1;myoLuc2;conCri1;triMan1;chrAsi1	1	loxAfr3	4	YES
KLK12	3.07087e-05	0.0408631	YES	11	30	2	hetGla2;triMan1	0	NA	2	NO
PKD1L2	3.10841e-05	0.0408631	YES	12	31	6	nanGal1;hetGla2;eptFus1;myoDav1;myoLuc2;chrAsi1	4	turTru2;orcOrc1;balAcu1;odoRosDiv1	4	YES
SLC35C2	2.23875e-05	0.0408631	YES	14	30	0	NA	0	NA	0	NO
TSACC	2.71506e-05	0.0408631	YES	12	33	5	hetGla2;myoDav1;myoLuc2;conCri1;chrAsi1	0	NA	4	YES
C4orf17	4.28167e-05	0.0511698		10	29	0	NA	0	NA	0
IL36G	6.85482e-05	0.0750945		13	32	4	pteAle1;pteVam1;eptFus1;myoDav1	0	NA	1
CRYBA4	8.87869e-05	0.0778129		14	31	4	myoDav1;myoLuc2;conCri1;chrAsi1	0	NA	3
UTS2	8.20187e-05	0.0778129		13	34	2	hetGla2;conCri1	0	NA	2
ZNF214	8.4453e-05	0.0778129		11	32	7	perManBai1;mm10;rn6;nanGal1;hetGla2;myoDav1;myoLuc2	0	NA	3
HBB	0.000105708	0.0817433		12	30	1	triMan1	0	NA	1
PDZD9	0.000102198	0.0817433		13	32	1	hetGla2	0	NA	1
TRIT1	0.000139778	0.102084		12	34	0	NA	0	NA	0
RXFP2	0.000156466	0.108258		13	31	2	triMan1;chrAsi1	0	NA	2
IL22RA2	0.000184513	0.115505		13	34	0	NA	0	NA	0
NMRK1	0.000181997	0.115505		14	31	0	NA	0	NA	0
HMGB4	0.000208569	0.115998		14	33	0	NA	0	NA	0
LRRC70	0.000211772	0.115998		14	32	12	micOch1;perManBai1;mm10;rn6;nanGal1;hetGla2;pteAle1;pteVam1;eptFus1;myoDav1;myoLuc2;conCri1	5	otoGar3;cavPor3;octDeg1;oryCun2;ochPri3	4
PODXL	0.000206216	0.115998		13	30	3	conCri1;triMan1;chrAsi1	1	canFam3	3
ARR3	0.000226815	0.119268		12	33	8	micOch1;nanGal1;hetGla2;eptFus1;myoDav1;conCri1;triMan1;chrAsi1	2	cavPor3;loxAfr3	6
ALDH3A1	0.000248641	0.12106		12	27	2	hetGla2;triMan1	1	loxAfr3	2
TMEM138	0.0002401	0.12106		14	34	0	NA	0	NA	0
LRIT2	0.000271188	0.127323		14	31	8	nanGal1;hetGla2;eptFus1;myoDav1;myoLuc2;conCri1;triMan1;chrAsi1	2	cerSim1;loxAfr3	6
DKFZP686J19100	0.000298188	0.130666		14	32	6	nanGal1;hetGla2;eptFus1;myoDav1;myoLuc2;chrAsi1	2	turTru2;orcOrc1	4
SIKE1	0.000292227	0.130666		11	33	0	NA	0	NA	0
C10orf90	0.000329963	0.131445		12	31	1	myoDav1	0	NA	1
RTFDC1	0.000322896	0.131445		13	33	1	hetGla2	0	NA	1
ZNF425	0.000314379	0.131445		8	24	7	perManBai1;mm10;hetGla2;pteAle1;eptFus1;myoLuc2;conCri1	4	cavPor3;orcOrc1;panHod1;bosTau8	4
C12orf43	0.000418506	0.134901		12	33	0	NA	0	NA	0
C12orf50	0.000422243	0.134901		11	33	0	NA	0	NA	0
C2orf40	0.000512115	0.134901		13	31	0	NA	0	NA	0
CHAC1	0.000555309	0.134901		13	31	0	NA	0	NA	0
CPNE1	0.000549856	0.134901		13	30	0	NA	0	NA	0
DPPA2	0.000464004	0.134901		10	32	3	eptFus1;myoDav1;myoLuc2	0	NA	1
ENTPD3	0.000554477	0.134901		12	30	0	NA	0	NA	0
IGIP	0.00053354	0.134901		14	34	0	NA	0	NA	0
IZUMO2	0.000557333	0.134901		13	30	1	hetGla2	0	NA	1
KCTD18	0.000574659	0.134901		13	29	2	hetGla2;pteAle1	0	NA	2
KLHL33	0.000375004	0.134901		14	31	0	NA	0	NA	0
PPY	0.000549587	0.134901		13	34	1	triMan1	0	NA	1
PRIMPOL	0.000437471	0.134901		12	32	0	NA	0	NA	0
PTPN18	0.000468216	0.134901		14	25	6	pteAle1;pteVam1;eptFus1;myoDav1;myoLuc2;chrAsi1	2	felCat8;musFur1	2
RASSF6	0.000430697	0.134901		13	31	1	hetGla2	0	NA	1
RGS18	0.000415928	0.134901		12	30	0	NA	0	NA	0
SCN7A	0.000565228	0.134901		10	25	0	NA	0	NA	0
SHARPIN	0.000401767	0.134901		12	28	0	NA	0	NA	0
SLC36A3	0.000468217	0.134901		12	32	4	nanGal1;hetGla2;triMan1;chrAsi1	1	loxAfr3	4
TAS2R1	0.000552748	0.134901		13	30	3	hetGla2;conCri1;triMan1	1	orcOrc1	3
TGDS	0.000467336	0.134901		11	33	0	NA	0	NA	0
USP32	0.00034993	0.134901		13	31	0	NA	0	NA	0
ZNF2	0.000476535	0.134901		14	34	0	NA	0	NA	0
CCDC137	0.000607318	0.137828		12	29	0	NA	0	NA	0
CRB1	0.000608095	0.137828		13	29	5	hetGla2;eptFus1;myoLuc2;conCri1;chrAsi1	0	NA	4
DUSP21	0.00066023	0.139218		14	31	1	hetGla2	0	NA	1
FAM71F1	0.000677767	0.139218		13	33	0	NA	0	NA	0
LACTBL1	0.00062511	0.139218		10	18	3	nanGal1;hetGla2;chrAsi1	0	NA	3
PDE6H	0.000649579	0.139218		14	30	1	nanGal1	0	NA	1
ZNF483	0.000677237	0.139218		12	34	2	hetGla2;chrAsi1	0	NA	2
ZYG11A	0.000677118	0.139218		11	31	0	NA	0	NA	0
RBP3	0.000691852	0.139587		9	32	2	nanGal1;eptFus1	0	NA	2
UTS2R	0.000700803	0.139587		8	27	1	hetGla2	0	NA	1
SUSD3	0.000729729	0.143179		13	31	0	NA	0	NA	0
ARL1	0.000819894	0.143711		14	34	0	NA	0	NA	0
C19orf81	0.00079996	0.143711		10	26	0	NA	0	NA	0
CABS1	0.000814408	0.143711		14	31	1	hetGla2	0	NA	1
HIGD1B	0.000819894	0.143711		14	34	0	NA	0	NA	0
RNF133	0.000819894	0.143711		14	34	0	NA	0	NA	0
RTBDN	0.000803492	0.143711		14	32	2	conCri1;chrAsi1	0	NA	2
TMC8	0.00081752	0.143711		9	26	0	NA	0	NA	0
TMEM190	0.000794211	0.143711		10	26	0	NA	0	NA	0
NOXRED1	0.000862157	0.146997		14	34	1	hetGla2	0	NA	1
TMEM210	0.000861726	0.146997		11	29	1	hetGla2	0	NA	1
TPRKB	0.000872186	0.146997		11	31	1	hetGla2	0	NA	1
GSTO2	0.000922649	0.153533		14	33	0	NA	0	NA	0
ARHGAP33	0.00133479	0.153886		11	24	0	NA	0	NA	0
ASB12	0.00146443	0.153886		13	33	0	NA	0	NA	0
BLNK	0.00131984	0.153886		13	27	0	NA	0	NA	0
BTBD18	0.00114996	0.153886		13	32	0	NA	0	NA	0
C16orf54	0.00129716	0.153886		14	31	0	NA	0	NA	0
C1orf185	0.00145495	0.153886		12	32	1	hetGla2	0	NA	1
C3orf62	0.000981084	0.153886		11	33	0	NA	0	NA	0
C7orf62	0.00102695	0.153886		13	33	0	NA	0	NA	0
CALR3	0.00121595	0.153886		14	23	1	hetGla2	0	NA	1
CDKL3	0.00141447	0.153886		13	32	0	NA	0	NA	0
CDNF	0.00103928	0.153886		14	32	0	NA	0	NA	0
CFAP97	0.00103782	0.153886		13	34	0	NA	0	NA	0
CGN	0.00131555	0.153886		13	30	1	hetGla2	0	NA	1
CPVL	0.00104159	0.153886		14	32	0	NA	0	NA	0
CTD_2616J11.11	0.00106065	0.153886		12	29	1	hetGla2	0	NA	1
CTD_3088G3.8	0.00123604	0.153886		13	22	11	micOch1;mm10;rn6;nanGal1;pteAle1;eptFus1;myoDav1;myoLuc2;conCri1;triMan1;chrAsi1	7	calJac3;otoGar3;speTri2;cavPor3;octDeg1;ochPri3;camFer1	5
DOCK9	0.00123146	0.153886		12	28	0	NA	0	NA	0
FGF2	0.00117042	0.153886		8	21	0	NA	0	NA	0
GJA10	0.00124722	0.153886		14	30	7	nanGal1;hetGla2;eptFus1;myoDav1;myoLuc2;conCri1;chrAsi1	1	lepWed1	5
H1F0	0.00118308	0.153886		14	31	0	NA	0	NA	0
HAGHL	0.00141921	0.153886		12	28	4	hetGla2;myoDav1;triMan1;chrAsi1	3	tarSyr2;otoGar3;loxAfr3	4
HIST1H1T	0.00137385	0.153886		13	34	1	hetGla2	0	NA	1
HMGCLL1	0.00130341	0.153886		13	31	0	NA	0	NA	0
HSF2BP	0.00140211	0.153886		10	29	0	NA	0	NA	0
ICAM3	0.000989969	0.153886		12	31	5	perManBai1;mm10;rn6;nanGal1;conCri1	0	NA	2
IP6K3	0.00136253	0.153886		12	32	1	hetGla2	0	NA	1
KIAA0141	0.00114584	0.153886		13	32	0	NA	0	NA	0
KIF13A	0.00121154	0.153886		9	29	0	NA	0	NA	0
LIMD1	0.00128259	0.153886		12	28	1	hetGla2	0	NA	1
MKRN3	0.00132525	0.153886		11	32	6	micOch1;perManBai1;mm10;hetGla2;eptFus1;myoLuc2	0	NA	3
PDCD2L	0.00145226	0.153886		11	32	0	NA	0	NA	0
PKD2L2	0.00131853	0.153886		13	31	0	NA	0	NA	0
PLAC8L1	0.00126987	0.153886		14	31	0	NA	0	NA	0
PRSS36	0.00126245	0.153886		11	26	5	micOch1;mm10;rn6;nanGal1;hetGla2	0	NA	2
2001-09-01	0.00140295	0.153886		14	30	1	hetGla2	0	NA	1
SERPIND1	0.00144659	0.153886		13	30	0	NA	0	NA	0
SLC10A3	0.00103069	0.153886		12	31	1	hetGla2	0	NA	1
STX2	0.00107101	0.153886		10	32	0	NA	0	NA	0
SUV39H2	0.00117753	0.153886		13	32	0	NA	0	NA	0
TEKT5	0.00141928	0.153886		13	29	2	nanGal1;hetGla2	0	NA	2
TNFAIP3	0.00120459	0.153886		13	32	1	hetGla2	0	NA	1
TNP1	0.00102695	0.153886		13	33	0	NA	0	NA	0
UBE2E2	0.00138811	0.153886		8	29	1	chrAsi1	0	NA	1
UBE2U	0.00111407	0.153886		11	33	2	nanGal1;hetGla2	0	NA	2
URB1	0.00127804	0.153886		10	27	0	NA	0	NA	0
VEGFC	0.000945885	0.153886		13	32	0	NA	0	NA	0
WNT8B	0.00147494	0.153886		14	29	0	NA	0	NA	0
ALG6	0.00159533	0.157446		11	31	0	NA	0	NA	0
CD200R1	0.00159856	0.157446		8	29	0	NA	0	NA	0
CKLF_CMTM1	0.00158286	0.157446		11	30	0	NA	0	NA	0
F11	0.00163712	0.157446		12	32	3	pteAle1;myoDav1;myoLuc2	0	NA	1
FAM71D	0.00161992	0.157446		14	33	1	hetGla2	0	NA	1
GFPT2	0.00167674	0.157446		14	28	1	hetGla2	0	NA	1
KCNK2	0.00166848	0.157446		13	29	0	NA	0	NA	0
KRT77	0.00161286	0.157446		13	31	1	triMan1	0	NA	1
LRRIQ3	0.0015394	0.157446		12	30	1	hetGla2	0	NA	1
MATN2	0.00160068	0.157446		13	29	0	NA	0	NA	0
MTNR1B	0.00166801	0.157446		12	28	3	nanGal1;hetGla2;chrAsi1	3	calJac3;orcOrc1;balAcu1	3
NXPE2	0.00167206	0.157446		11	29	6	pteAle1;eptFus1;myoDav1;myoLuc2;conCri1;triMan1	6	orcOrc1;balAcu1;felCat8;canFam3;musFur1;lepWed1	3
OTOL1	0.00154015	0.157446		10	31	0	NA	0	NA	0
TRIML1	0.00159158	0.157446		12	27	0	NA	0	NA	0
GLIPR1L2	0.00172668	0.160985		13	30	0	NA	0	NA	0
GNAT2	0.0017544	0.161577		13	34	2	hetGla2;chrAsi1	0	NA	2
GOT1L1	0.0017576	0.161577		13	32	0	NA	0	NA	0
MAN2C1	0.00178022	0.162519		12	30	3	eptFus1;myoDav1;myoLuc2	0	NA	1
FAM132B	0.00179459	0.162701		10	18	1	hetGla2	0	NA	1
SPICE1	0.00181591	0.163507		11	33	0	NA	0	NA	0
ARMC12	0.00185958	0.165176		10	31	0	NA	0	NA	0
ZNF34	0.00185793	0.165176		7	25	2	mm10;nanGal1	0	NA	1
C1orf74	0.0019079	0.167209		13	33	0	NA	0	NA	0
NOL7	0.0018995	0.167209		12	29	0	NA	0	NA	0
C15orf27	0.00193116	0.16761		12	26	0	NA	0	NA	0
ST20_MTHFS	0.00193799	0.16761		11	33	0	NA	0	NA	0
HTR3E	0.0019646	0.168097		8	28	6	mm10;rn6;hetGla2;pteAle1;triMan1;chrAsi1	6	rheMac3;macFas5;tarSyr2;speTri2;cavPor3;balAcu1	5
PPEF1	0.00196919	0.168097		12	25	0	NA	0	NA	0
ARSJ	0.00200612	0.170145		10	30	0	NA	0	NA	0
BCL2A1	0.00205585	0.172612		8	34	3	perManBai1;mm10;nanGal1	0	NA	1
FABP2	0.00206147	0.172612		11	31	0	NA	0	NA	0
GJE1	0.00210456	0.173363		13	34	4	nanGal1;hetGla2;conCri1;chrAsi1	3	rhiRox1;saiBol1;otoGar3	4
SLC26A8	0.00211	0.173363		12	31	0	NA	0	NA	0
TMEM91	0.00210909	0.173363		13	30	4	eptFus1;myoDav1;myoLuc2;conCri1	0	NA	2
TEX2	0.00213121	0.174018		13	31	1	hetGla2	0	NA	1
CPN1	0.00219888	0.178435		11	27	0	NA	0	NA	0
ASAH2	0.00222872	0.179747		10	29	0	NA	0	NA	0
C11orf65	0.00225331	0.180622		12	31	1	hetGla2	0	NA	1
C11orf80	0.00229759	0.183056		11	23	1	hetGla2	0	NA	1
C2orf61	0.00233456	0.183773		14	31	1	hetGla2	0	NA	1
GRP	0.00232386	0.183773		12	25	0	NA	0	NA	0
CRYBB3	0.00236357	0.183846		13	29	3	myoDav1;conCri1;chrAsi1	0	NA	3
GUCY2F	0.00237744	0.183846		13	30	7	nanGal1;hetGla2;eptFus1;myoDav1;myoLuc2;triMan1;chrAsi1	2	speTri2;musFur1	5
PRMT2	0.00235752	0.183846		13	30	1	hetGla2	0	NA	1
ATP1B1	0.00244072	0.186545		13	33	1	hetGla2	0	NA	1
DHRS1	0.00243206	0.186545		13	33	2	hetGla2;triMan1	1	cerSim1	2
DCXR	0.00245666	0.186678		9	25	0	NA	0	NA	0
GGPS1	0.00252685	0.190908		14	33	0	NA	0	NA	0
FRMPD2	0.002613	0.195231		11	28	4	eptFus1;myoDav1;myoLuc2;triMan1	1	canFam3	2
PBDC1	0.00261378	0.195231		9	24	0	NA	0	NA	0
CCDC94	0.00265917	0.1975		11	23	3	pteAle1;pteVam1;eptFus1	0	NA	1
SLC14A2	0.00267565	0.197607		12	29	1	triMan1	0	NA	1
MIOX	0.0027022	0.198454		12	26	0	NA	0	NA	0
ARHGEF12	0.00276846	0.20219		10	27	1	hetGla2	0	NA	1
WFDC10A	0.00279298	0.202854		9	23	1	hetGla2	0	NA	1
PALLD	0.00281014	0.202979		13	24	1	hetGla2	0	NA	1
MPP4	0.00285232	0.20376		13	29	2	nanGal1;hetGla2	0	NA	2
NDST4	0.00286746	0.20376		9	27	1	pteAle1	0	NA	1
RBAK	0.00286597	0.20376		12	30	0	NA	0	NA	0
HIST1H2BN	0.00290626	0.205407		11	28	0	NA	0	NA	0
PBRM1	0.00292242	0.205444		10	30	1	pteAle1	0	NA	1
SCD	0.0029567	0.206748		13	32	1	hetGla2	0	NA	1
IZUMO3	0.00299019	0.207985		11	29	0	NA	0	NA	0
PROCA1	0.00306778	0.212258		12	32	1	hetGla2	0	NA	1
MIP	0.00311249	0.214224		14	34	2	conCri1;chrAsi1	0	NA	2
ADAM32	0.00313958	0.214675		11	22	1	hetGla2	0	NA	1
RLN2	0.00315171	0.214675		12	29	5	nanGal1;pteAle1;pteVam1;conCri1;triMan1	1	loxAfr3	4
TMPRSS12	0.00318537	0.21585		11	32	1	hetGla2	0	NA	1
SLC30A10	0.00323494	0.218085		8	19	0	NA	0	NA	0
BTBD7	0.00344139	0.226753		10	29	1	hetGla2	0	NA	1
CRISP1	0.00344977	0.226753		12	32	2	hetGla2;pteAle1	2	cavPor3;octDeg1	2
CRYGS	0.00342443	0.226753		14	33	3	nanGal1;conCri1;chrAsi1	0	NA	3
FADS2	0.00343906	0.226753		9	27	0	NA	0	NA	0
RP11_146B14.1	0.00344966	0.226753		12	31	0	NA	0	NA	0
PPFIBP1	0.0034973	0.228734		12	28	0	NA	0	NA	0
CRTAM	0.00354597	0.229591		11	30	0	NA	0	NA	0
SPRR2B	0.0035628	0.229591		12	21	1	pteVam1	0	NA	1
ZSCAN31	0.0035373	0.229591		9	30	8	perManBai1;mm10;rn6;nanGal1;hetGla2;pteVam1;triMan1;chrAsi1	4	speTri2;octDeg1;oryCun2;loxAfr3	5
MAGEB1	0.00360384	0.231103		11	30	4	nanGal1;hetGla2;myoDav1;myoLuc2	1	ochPri3	3
HHIPL2	0.00363067	0.231693		11	28	5	hetGla2;pteAle1;pteVam1;eptFus1;myoLuc2	3	cavPor3;turTru2;orcOrc1	2
CRYBA1	0.00367701	0.2322		13	33	3	nanGal1;conCri1;chrAsi1	0	NA	3
GRK7	0.00370926	0.2322		13	32	7	micOch1;perManBai1;mm10;rn6;nanGal1;hetGla2;myoDav1	0	NA	3
SEL1L2	0.00369755	0.2322		11	25	1	hetGla2	0	NA	1
SLC52A3	0.00370548	0.2322		13	33	0	NA	0	NA	0
GSG1	0.00375236	0.232682		14	33	1	conCri1	0	NA	1
IL5	0.00374065	0.232682		14	34	0	NA	0	NA	0
CCDC102B	0.00379783	0.234395		10	29	3	micOch1;perManBai1;mm10	1	ochPri3	1
TMEM202	0.00387764	0.238203		11	28	1	triMan1	0	NA	1
FMO3	0.00390446	0.238735		8	30	2	triMan1;chrAsi1	1	tarSyr2	2
SLC18B1	0.00394899	0.24034		13	29	1	triMan1	0	NA	1
P2RX5_TAX1BP3	0.00403233	0.243161		11	29	0	NA	0	NA	0
TREML1	0.00402699	0.243161		11	32	2	rn6;hetGla2	1	octDeg1	2
FAM64A	0.00408361	0.243664		14	33	0	NA	0	NA	0
RTL1	0.00405937	0.243664		7	26	1	hetGla2	1	ochPri3	1
STX10	0.00409629	0.243664		12	32	6	micOch1;perManBai1;mm10;rn6;hetGla2;conCri1	2	cavPor3;octDeg1	3
NLRC3	0.0041657	0.24618		13	23	1	hetGla2	0	NA	1
SPTBN5	0.00417603	0.24618		14	25	7	rn6;nanGal1;hetGla2;eptFus1;myoDav1;myoLuc2;conCri1	4	camFer1;turTru2;orcOrc1;balAcu1	4
KIAA1407	0.00420174	0.24659		13	31	2	eptFus1;myoDav1	0	NA	1
GRHL3	0.00422732	0.246988		14	32	0	NA	0	NA	0
EPHX2	0.00429545	0.249858		10	29	0	NA	0	NA	0
RBM23	0.00440399	0.255044		13	33	5	perManBai1;mm10;rn6;nanGal1;chrAsi1	2	cavPor3;octDeg1	2
PLGRKT	0.00447102	0.256664		14	32	1	triMan1	0	NA	1
RNF111	0.00445999	0.256664		14	32	0	NA	0	NA	0
CRYGN	0.00451908	0.258295		12	31	5	nanGal1;hetGla2;eptFus1;myoDav1;triMan1	2	ponAbe2;calJac3	4
BLM	0.00456173	0.258731		10	28	0	NA	0	NA	0
HIST4H4	0.00456607	0.258731		13	33	4	pteAle1;pteVam1;myoDav1;myoLuc2	1	camFer1	1
CAMK2G	0.0046612	0.259645		14	31	0	NA	0	NA	0
EFCAB6	0.00465466	0.259645		9	28	2	nanGal1;hetGla2	1	orcOrc1	2
IL7R	0.00464999	0.259645		12	32	0	NA	0	NA	0
KRTAP1_5	0.00464037	0.259645		12	26	3	micOch1;pteAle1;pteVam1	0	NA	2
MGST1	0.00468822	0.260048		14	30	1	triMan1	0	NA	1
HCLS1	0.00485975	0.266193		13	32	0	NA	0	NA	0
KRTAP2_3	0.00485408	0.266193		13	26	4	pteAle1;pteVam1;eptFus1;triMan1	0	NA	2
TNFSF8	0.0048441	0.266193		13	32	0	NA	0	NA	0
IL12RB2	0.00493578	0.267119		13	31	1	hetGla2	0	NA	1
KCNRG	0.00489736	0.267119		14	32	2	hetGla2;triMan1	3	otoGar3;cavPor3;octDeg1	2
POLR2I	0.00493763	0.267119		13	34	0	NA	0	NA	0
NRIP1	0.0049857	0.268615		12	31	0	NA	0	NA	0
B3GNT6	0.00501451	0.269064		12	23	5	pteAle1;pteVam1;eptFus1;myoDav1;conCri1	2	turTru2;orcOrc1	2
LRP2BP	0.00513676	0.274504		14	31	1	hetGla2	0	NA	1
CASP8	0.00530638	0.275725		11	33	2	eptFus1;myoDav1	0	NA	1
CCL28	0.00527877	0.275725		12	33	0	NA	0	NA	0
DPPA3	0.00527602	0.275725		8	22	1	mm10	0	NA	1
FGD6	0.00521878	0.275725		11	30	0	NA	0	NA	0
IRAK4	0.0052666	0.275725		13	31	0	NA	0	NA	0
TKTL2	0.00529142	0.275725		13	32	3	nanGal1;hetGla2;conCri1	2	turTru2;orcOrc1	3
UXT	0.00530643	0.275725		13	31	0	NA	0	NA	0
GPX1	0.00534995	0.276892		12	29	0	NA	0	NA	0
AF165138.7	0.00538587	0.277657		14	34	8	perManBai1;nanGal1;hetGla2;eptFus1;myoDav1;myoLuc2;conCri1;chrAsi1	1	cavPor3	5
CEP63	0.00542647	0.278658		12	29	1	triMan1	0	NA	1
CAPN11	0.00547478	0.280045		11	32	1	hetGla2	1	canFam3	1
LRTOMT	0.0054979	0.280137		14	32	0	NA	0	NA	0
ARPC2	0.00551978	0.280166		14	33	1	hetGla2	0	NA	1
MRPS23	0.00557445	0.281853		14	33	0	NA	0	NA	0
FITM2	0.00564426	0.283204		12	31	0	NA	0	NA	0
GZMK	0.00563843	0.283204		11	34	3	nanGal1;conCri1;chrAsi1	0	NA	3
MAPKBP1	0.00578141	0.288983		13	30	0	NA	0	NA	0
DDIT4L	0.00583678	0.289548		13	33	1	hetGla2	0	NA	1
PSTPIP1	0.00581915	0.289548		13	30	0	NA	0	NA	0
PRSS54	0.00586021	0.289618		13	33	1	hetGla2	0	NA	1
KANK2	0.00590508	0.290041		13	24	2	nanGal1;hetGla2	0	NA	2
SPAG6	0.0059129	0.290041		10	33	4	nanGal1;hetGla2;eptFus1;myoLuc2	2	cavPor3;octDeg1	3
PFKFB1	0.00601859	0.294128		12	26	1	triMan1	0	NA	1
SPATC1L	0.00608041	0.296049		12	25	1	hetGla2	0	NA	1
HACL1	0.00620313	0.300909		14	29	1	hetGla2	0	NA	1
FEZF1	0.00633604	0.301788		13	29	0	NA	0	NA	0
LYZL1	0.00625635	0.301788		13	30	4	nanGal1;hetGla2;myoDav1;myoLuc2	0	NA	3
PDE3A	0.00632019	0.301788		10	19	0	NA	0	NA	0
PDE8B	0.0063293	0.301788		14	28	0	NA	0	NA	0
SLC51B	0.00628153	0.301788		12	34	0	NA	0	NA	0
MKL2	0.00641504	0.303353		12	28	1	triMan1	0	NA	1
SLAMF6	0.00640509	0.303353		13	32	1	triMan1	0	NA	1
PLSCR2	0.00648708	0.30566		8	29	1	hetGla2	1	bisBis1	1
NDST3	0.00654493	0.307284		10	27	1	eptFus1	0	NA	1
CKLF	0.00668286	0.312644		13	32	0	NA	0	NA	0
ADORA2A	0.00707646	0.316419		10	30	0	NA	0	NA	0
ARL16	0.00689458	0.316419		10	30	1	chrAsi1	0	NA	1
DHX30	0.00696823	0.316419		12	29	0	NA	0	NA	0
EGFL6	0.00698688	0.316419		14	26	1	conCri1	1	orcOrc1	1
MMRN2	0.00704439	0.316419		10	23	0	NA	0	NA	0
NMUR1	0.00705932	0.316419		14	31	1	hetGla2	0	NA	1
PPP1R37	0.00685129	0.316419		12	25	1	triMan1	0	NA	1
SPECC1L_ADORA2A	0.00707646	0.316419		10	30	0	NA	0	NA	0
TMEM234	0.00684511	0.316419		13	33	0	NA	0	NA	0
TRIM38	0.00680062	0.316419		9	32	2	nanGal1;hetGla2	1	canFam3	2
VNN1	0.00695972	0.316419		13	32	0	NA	0	NA	0
ZFP69	0.00704559	0.316419		12	33	1	chrAsi1	0	NA	1
ZNF155	0.00689275	0.316419		7	20	6	micOch1;perManBai1;nanGal1;hetGla2;eptFus1;triMan1	2	oryCun2;panHod1	4
C1orf56	0.00712274	0.317409		12	30	1	hetGla2	1	equCab2	1
ALG14	0.00717433	0.317782		13	26	0	NA	0	NA	0
ZNF432	0.00717946	0.317782		11	24	4	mm10;hetGla2;conCri1;triMan1	1	loxAfr3	4
ECH1	0.00733846	0.32373		13	27	0	NA	0	NA	0
KRT12	0.00751274	0.330309		14	32	3	nanGal1;conCri1;chrAsi1	0	NA	3
PLEKHS1	0.00756862	0.331657		14	34	1	conCri1	0	NA	1
RDH13	0.00782859	0.340684		11	32	0	NA	0	NA	0
RTN2	0.00785238	0.340684		13	33	1	hetGla2	0	NA	1
SLC7A4	0.00782127	0.340684		10	29	0	NA	0	NA	0
FAM83A	0.00790649	0.341904		13	24	1	hetGla2	0	NA	1
CST3	0.00805448	0.346027		11	18	0	NA	0	NA	0
PRR32	0.00804155	0.346027		10	27	2	hetGla2;pteAle1	2	cavPor3;octDeg1	2
IPCEF1	0.00811482	0.347017		12	32	0	NA	0	NA	0
TRPM1	0.00813032	0.347017		9	29	1	myoDav1	0	NA	1
CES2	0.00820896	0.347795		14	30	6	pteAle1;pteVam1;eptFus1;myoDav1;myoLuc2;triMan1	3	oryCun2;vicPac2;camFer1	2
CRYBA2	0.00825358	0.347795		14	31	4	eptFus1;myoLuc2;conCri1;chrAsi1	0	NA	3
DDX53	0.00818881	0.347795		11	24	6	micOch1;perManBai1;mm10;rn6;nanGal1;hetGla2	2	orcOrc1;felCat8	2
GABRR3	0.00828084	0.347795		12	29	6	nanGal1;hetGla2;eptFus1;myoDav1;myoLuc2;conCri1	4	orcOrc1;cerSim1;canFam3;lepWed1	4
TRIM27	0.00826662	0.347795		10	24	2	eptFus1;myoLuc2	0	NA	1
AC007906.1	0.00840213	0.351711		14	34	0	NA	0	NA	0
PPM1N	0.00842759	0.351711		11	25	3	nanGal1;myoLuc2;conCri1	1	camFer1	3
DYTN	0.00872023	0.362772		13	33	5	rn6;nanGal1;hetGla2;pteAle1;triMan1	4	ponAbe2;bisBis1;capHir1;canFam3	4
CENPU	0.00889698	0.368958		12	32	0	NA	0	NA	0
NELFE	0.00895083	0.370024		13	33	0	NA	0	NA	0
ABCB5	0.00911534	0.370933		11	27	3	micOch1;nanGal1;hetGla2	2	orcOrc1;balAcu1	2
CCDC175	0.00914486	0.370933		10	33	1	hetGla2	0	NA	1
CRISP2	0.00907802	0.370933		11	31	1	hetGla2	0	NA	1
INSL6	0.00917034	0.370933		13	31	1	hetGla2	0	NA	1
IQCA1P1	0.00910894	0.370933		10	32	1	hetGla2	3	turTru2;orcOrc1;balAcu1	1
RNF151	0.00909968	0.370933		14	31	0	NA	0	NA	0
SMIM24	0.00900154	0.370933		13	26	0	NA	0	NA	0
INSL3	0.00925191	0.373085		13	24	0	NA	0	NA	0
ZNF599	0.00939408	0.377659		12	29	6	micOch1;perManBai1;rn6;hetGla2;pteAle1;pteVam1	3	panPan1;cavPor3;octDeg1	3
SDR42E1	0.00945732	0.379042		14	33	2	pteAle1;pteVam1	0	NA	1
GSTM4	0.00955947	0.381972		10	24	2	hetGla2;conCri1	0	NA	2
PPP1R3G	0.00959247	0.382129		11	19	1	hetGla2	0	NA	1
CCL26	0.00975296	0.384503		13	29	3	nanGal1;hetGla2;triMan1	2	tarSyr2;ochPri3	3
COQ3	0.00976608	0.384503		12	32	0	NA	0	NA	0
TICAM2	0.00976906	0.384503		14	33	0	NA	0	NA	0
ZNF280B	0.00968538	0.384503		7	33	0	NA	0	NA	0
B3GNTL1	0.0099858	0.384966		11	23	0	NA	0	NA	0
CYP2A6	0.00991314	0.384966		8	20	4	mm10;pteAle1;pteVam1;conCri1	3	turTru2;orcOrc1;balAcu1	3
JARID2	0.00995902	0.384966		13	23	0	NA	0	NA	0
LEKR1	0.00994315	0.384966		13	30	1	hetGla2	0	NA	1
PRKAG3	0.00990016	0.384966		13	32	0	NA	0	NA	0
ROS1	0.00982567	0.384966		12	27	1	hetGla2	0	NA	1
USP50	0.00990408	0.384966		13	31	2	nanGal1;hetGla2	2	calJac3;saiBol1	2
LYZL2	0.0100298	0.385531		9	32	3	nanGal1;hetGla2;myoLuc2	1	panPan1	3
SPRR2E	0.0101023	0.387188		10	22	1	nanGal1	1	lepWed1	1
SLC19A3	0.0101448	0.387686		12	32	0	NA	0	NA	0
LGR4	0.0102071	0.388936		13	31	1	hetGla2	0	NA	1
NAT9	0.0102471	0.38933		14	34	0	NA	0	NA	0
S100A6	0.0103005	0.390233		14	33	2	hetGla2;pteVam1	4	panHod1;bosTau8;bisBis1;capHir1	2
LDLRAD2	0.0104334	0.394133		13	25	4	eptFus1;myoDav1;triMan1;chrAsi1	1	orcOrc1	3
TEX101	0.0105214	0.396317		12	32	0	NA	0	NA	0
ETAA1	0.010755	0.402897		13	29	2	nanGal1;hetGla2	0	NA	2
TEDDM1	0.0107574	0.402897		13	24	1	hetGla2	0	NA	1
GRIFIN	0.0109149	0.406575		11	28	3	nanGal1;eptFus1;chrAsi1	0	NA	3
HIGD1C	0.0109175	0.406575		11	31	1	hetGla2	3	otoGar3;turTru2;orcOrc1	1
ZSCAN16	0.011145	0.413878		10	31	5	micOch1;perManBai1;nanGal1;hetGla2;pteAle1	1	cavPor3	3
SEBOX	0.0113643	0.420833		14	34	5	nanGal1;hetGla2;conCri1;triMan1;chrAsi1	4	ponAbe2;calJac3;saiBol1;loxAfr3	5
AKAP7	0.0114981	0.420855		12	30	0	NA	0	NA	0
AQP6	0.011589	0.420855		14	33	2	pteAle1;pteVam1	0	NA	1
COX18	0.0115672	0.420855		12	32	1	hetGla2	0	NA	1
GPA33	0.0114102	0.420855		11	28	1	conCri1	0	NA	1
NPBWR1	0.0115101	0.420855		12	20	1	triMan1	0	NA	1
PFN4	0.0115492	0.420855		14	33	3	hetGla2;eptFus1;myoLuc2	0	NA	2
SLC47A1	0.0114835	0.420855		8	29	1	triMan1	1	calJac3	1
TXNRD3	0.011819	0.428022		13	25	1	hetGla2	0	NA	1
GLRA4	0.0118583	0.428267		14	32	1	triMan1	0	NA	1
ROM1	0.0121965	0.439275		13	33	2	nanGal1;conCri1	0	NA	2
RPP21	0.0123053	0.441983		13	31	1	triMan1	0	NA	1
PPP1R36	0.0124781	0.446966		13	28	0	NA	0	NA	0
SERINC4	0.0126562	0.452116		14	33	4	nanGal1;conCri1;triMan1;chrAsi1	3	cavPor3;octDeg1;balAcu1	4
CH507_9B2.5	0.012774	0.453858		11	31	1	pteAle1	0	NA	1
PWP2	0.012774	0.453858		11	31	1	pteAle1	0	NA	1
ATP1A4	0.0129538	0.459003		11	31	2	nanGal1;hetGla2	2	orcOrc1;balAcu1	2
GCSAM	0.0130783	0.46093		14	32	0	NA	0	NA	0
LY6G5C	0.0130521	0.46093		14	33	2	micOch1;hetGla2	0	NA	2
RGAG1	0.0131489	0.46218		13	30	5	eptFus1;myoDav1;myoLuc2;conCri1;triMan1	1	calJac3	3
FAM227B	0.0132867	0.465292		13	23	1	hetGla2	0	NA	1
NT5C1B_RDH14	0.0133082	0.465292		14	32	1	hetGla2	3	cavPor3;turTru2;orcOrc1	1
CXorf65	0.0133855	0.466752		14	31	1	nanGal1	0	NA	1
DEFB104B	0.0135566	0.467758		11	27	4	micOch1;perManBai1;rn6;nanGal1	1	tarSyr2	1
FAM118B	0.013537	0.467758		12	30	0	NA	0	NA	0
NUDT16	0.0135353	0.467758		9	21	0	NA	0	NA	0
SCP2D1	0.0134847	0.467758		14	34	1	conCri1	0	NA	1
BSG	0.0137324	0.470153		12	30	0	NA	0	NA	0
DPYD	0.0137962	0.470153		8	28	0	NA	0	NA	0
HIST1H2BG	0.013758	0.470153		14	31	0	NA	0	NA	0
NT5C1B	0.013768	0.470153		14	33	1	hetGla2	2	turTru2;orcOrc1	1
RDH16	0.0138319	0.470153		11	27	5	nanGal1;pteAle1;pteVam1;conCri1;triMan1	1	orcOrc1	4
WDR11	0.0138406	0.470153		11	30	0	NA	0	NA	0
C7orf72	0.0139707	0.472129		10	26	1	hetGla2	0	NA	1
MAML1	0.0139661	0.472129		11	27	0	NA	0	NA	0
CYB5R2	0.0142884	0.479171		14	34	1	hetGla2	0	NA	1
NPFFR2	0.0142812	0.479171		13	31	1	hetGla2	1	canFam3	1
ZNF585A	0.0142836	0.479171		7	21	3	rn6;myoDav1;myoLuc2	0	NA	2
LCTL	0.0144514	0.483406		14	30	3	nanGal1;hetGla2;chrAsi1	1	vicPac2	3
MS4A6A	0.0145993	0.487112		11	22	1	triMan1	0	NA	1
BFSP2	0.0148734	0.495001		13	27	3	nanGal1;conCri1;chrAsi1	0	NA	3
PPP1R15B	0.0149537	0.496416		11	28	0	NA	0	NA	0
KCNK1	0.0151752	0.502501		9	19	0	NA	0	NA	0
LYG2	0.0152942	0.50517		14	32	2	pteAle1;pteVam1	1	orcOrc1	1
EPHA6	0.0159209	0.523241		10	21	0	NA	0	NA	0
MREG	0.0159028	0.523241		11	31	0	NA	0	NA	0
CABP5	0.0160365	0.525725		11	33	1	conCri1	0	NA	1
CDK5RAP2	0.0162221	0.530486		12	29	4	pteAle1;eptFus1;myoDav1;myoLuc2	0	NA	1
IRGC	0.0164637	0.537052		11	28	1	hetGla2	2	turTru2;orcOrc1	1
C1orf105	0.0166189	0.53908		11	33	2	nanGal1;hetGla2	3	turTru2;orcOrc1;balAcu1	2
JSRP1	0.0166092	0.53908		14	22	0	NA	0	NA	0
PCDHGA11	0.0166489	0.53908		13	28	1	hetGla2	0	NA	1
GPX5	0.0168963	0.544824		11	31	1	hetGla2	0	NA	1
TRPV4	0.0169092	0.544824		9	26	0	NA	0	NA	0
HEATR9	0.0170222	0.547125		13	28	1	nanGal1	0	NA	1
ZNF215	0.0171232	0.549027		13	31	5	micOch1;mm10;nanGal1;hetGla2;triMan1	3	tarSyr2;octDeg1;oryCun2	3
C17orf64	0.0172843	0.551503		13	34	1	hetGla2	0	NA	1
FAM208B	0.0172658	0.551503		12	29	3	eptFus1;myoDav1;myoLuc2	0	NA	1
ODF3L1	0.0174443	0.553918		14	31	1	hetGla2	0	NA	1
WDR64	0.0174098	0.553918		10	26	0	NA	0	NA	0
BTF3	0.0176638	0.558081		12	29	0	NA	0	NA	0
GPR158	0.0176944	0.558081		11	27	0	NA	0	NA	0
PQLC1	0.0177394	0.558081		12	28	0	NA	0	NA	0
TMEM5	0.0177452	0.558081		9	31	0	NA	0	NA	0
CD1D	0.0179259	0.56108		8	25	2	nanGal1;pteAle1	1	lepWed1	2
MEP1A	0.0179068	0.56108		12	31	0	NA	0	NA	0
ZFP30	0.0179793	0.561416		10	32	2	myoLuc2;chrAsi1	2	calJac3;saiBol1	2
SOHLH2	0.0180621	0.562665		12	33	0	NA	0	NA	0
GPR62	0.0183448	0.563461		10	22	1	myoLuc2	0	NA	1
GRAMD4	0.0182238	0.563461		9	22	1	myoDav1	0	NA	1
HBA1	0.0183368	0.563461		11	23	1	triMan1	0	NA	1
LETM2	0.0182417	0.563461		14	30	2	nanGal1;hetGla2	0	NA	2
PLEKHB2	0.0183411	0.563461		9	26	0	NA	0	NA	0
XPO6	0.0182676	0.563461		11	29	0	NA	0	NA	0
CEACAM20	0.0184061	0.564026		11	27	5	pteAle1;eptFus1;myoDav1;conCri1;triMan1	2	octDeg1;musFur1	3
ATP10A	0.0186651	0.570631		9	24	1	myoDav1	0	NA	1
CEBPZ	0.0187599	0.5722		14	30	1	hetGla2	0	NA	1
LCN12	0.0190035	0.578288		10	24	2	nanGal1;hetGla2	0	NA	2
ANKLE1	0.0192372	0.582702		12	29	3	micOch1;perManBai1;conCri1	1	tarSyr2	2
CYP19A1	0.0192352	0.582702		13	32	0	NA	0	NA	0
ANKRD33	0.0195348	0.589001		13	28	3	nanGal1;myoDav1;chrAsi1	0	NA	3
LDHC	0.0195263	0.589001		10	28	0	NA	0	NA	0
KCNK17	0.0196889	0.592289		9	29	2	mm10;hetGla2	0	NA	2
C19orf84	0.0197497	0.592762		11	33	0	NA	0	NA	0
SPAG11B	0.0199015	0.595935		12	31	2	perManBai1;hetGla2	1	tarSyr2	2
TTC23L	0.0199461	0.595935		13	29	2	myoDav1;myoLuc2	0	NA	1
PCED1B	0.020151	0.600693		13	30	0	NA	0	NA	0
CCT6B	0.0203092	0.601395		12	28	2	nanGal1;hetGla2	2	calJac3;balAcu1	2
COPRS	0.0202471	0.601395		10	32	2	perManBai1;nanGal1	0	NA	1
GAA	0.0203118	0.601395		11	28	0	NA	0	NA	0
CRYBB1	0.0203586	0.601424		13	28	4	myoDav1;myoLuc2;conCri1;chrAsi1	0	NA	3
CPLX3	0.0205969	0.605775		13	32	1	chrAsi1	0	NA	1
FAM63A	0.0206441	0.605775		12	33	0	NA	0	NA	0
RPGRIP1L	0.0206056	0.605775		12	33	0	NA	0	NA	0
FAM200B	0.0207289	0.606908		10	32	10	micOch1;perManBai1;mm10;hetGla2;pteAle1;pteVam1;eptFus1;myoLuc2;conCri1;triMan1	10	speTri2;cavPor3;octDeg1;oryCun2;vicPac2;camFer1;turTru2;capHir1;felCat8;musFur1	5
KRT6A	0.0208141	0.608048		7	20	1	nanGal1	0	NA	1
NCBP2L	0.0209797	0.611527		13	33	6	perManBai1;mm10;rn6;nanGal1;hetGla2;conCri1	5	otoGar3;speTri2;ochPri3;camFer1;bosTau8	3
ASB15	0.0210899	0.612027		13	30	1	conCri1	0	NA	1
PTPRT	0.0210735	0.612027		12	23	0	NA	0	NA	0
C7orf31	0.0211818	0.612514		14	33	1	hetGla2	1	balAcu1	1
FUT1	0.0211999	0.612514		13	32	3	hetGla2;pteAle1;pteVam1	1	lepWed1	2
GRK4	0.0213837	0.614017		13	27	1	hetGla2	1	orcOrc1	1
SERPINB8	0.021392	0.614017		12	31	1	pteAle1	0	NA	1
ZNF696	0.021352	0.614017		8	29	5	perManBai1;mm10;rn6;nanGal1;pteAle1	2	cavPor3;octDeg1	2
MAGEB18	0.0215186	0.6151		13	29	3	nanGal1;hetGla2;triMan1	2	cavPor3;octDeg1	3
TCEAL1	0.0215234	0.6151		14	31	1	hetGla2	0	NA	1
C6orf201	0.0217467	0.61549		11	27	2	rn6;hetGla2	0	NA	2
FAM71B	0.0217649	0.61549		11	33	1	triMan1	1	loxAfr3	1
LYZ	0.0216457	0.61549		12	32	2	micOch1;hetGla2	0	NA	2
SCEL	0.0216221	0.61549		14	30	11	perManBai1;mm10;nanGal1;hetGla2;pteAle1;pteVam1;eptFus1;myoDav1;myoLuc2;conCri1;triMan1	10	cavPor3;oryCun2;ochPri3;camFer1;orcOrc1;balAcu1;felCat8;canFam3;musFur1;loxAfr3	5
SPATA45	0.0217711	0.61549		14	32	1	hetGla2	1	orcOrc1	1
CDX4	0.0218606	0.61571		8	21	0	NA	0	NA	0
DCLRE1C	0.0218726	0.61571		12	30	1	triMan1	0	NA	1
CTD_3222D19.2	0.021932	0.616065		13	26	0	NA	0	NA	0
ANKRD53	0.0221093	0.61972		13	33	2	nanGal1;hetGla2	0	NA	2
GJA9	0.0222238	0.621604		13	34	10	perManBai1;mm10;rn6;nanGal1;hetGla2;eptFus1;myoDav1;myoLuc2;conCri1;chrAsi1	5	papAnu2;cavPor3;octDeg1;ochPri3;lepWed1	5
LCT	0.0225854	0.629042		11	25	1	triMan1	0	NA	1
STXBP2	0.0225447	0.629042		11	32	1	pteAle1	0	NA	1
C7orf61	0.0230049	0.636679		12	32	1	hetGla2	1	octDeg1	1
SLC22A6	0.0229309	0.636679		12	33	1	pteAle1	0	NA	1
ZNF773	0.0229916	0.636679		7	22	2	eptFus1;triMan1	1	camFer1	2
SCGB1D1	0.0231353	0.638943		7	30	0	NA	1	canFam3	0
FAM111A	0.0234085	0.645132		8	28	4	rn6;nanGal1;conCri1;triMan1	5	panPan1;tarSyr2;turTru2;bosTau8;bisBis1	3
ZNF138	0.0234579	0.645141		9	24	2	pteAle1;pteVam1	3	panPan1;balAcu1;felCat8	1
HSD17B13	0.0235301	0.645776		8	30	0	NA	0	NA	0
GPR111	0.0236565	0.647892		14	31	1	triMan1	0	NA	1
CCNI2	0.0237094	0.647991		12	26	8	micOch1;perManBai1;mm10;rn6;nanGal1;myoDav1;myoLuc2;conCri1	5	otoGar3;vicPac2;camFer1;panHod1;musFur1	3
TEX37	0.0237683	0.648253		12	31	1	hetGla2	1	balAcu1	1
HSD11B1L	0.0238922	0.650283		10	26	4	perManBai1;mm10;hetGla2;eptFus1	2	cavPor3;octDeg1	3
C4orf19	0.0241095	0.654843		14	32	0	NA	0	NA	0
INMT	0.0242148	0.656345		11	32	6	nanGal1;pteAle1;eptFus1;myoDav1;myoLuc2;triMan1	7	rhiRox1;tarSyr2;balAcu1;cerSim1;felCat8;odoRosDiv1;lepWed1	3
BICD1	0.0242711	0.656518		12	29	0	NA	0	NA	0
GSAP	0.0243431	0.657113		11	25	0	NA	0	NA	0
GJA8	0.0248026	0.668144		9	32	1	chrAsi1	0	NA	1
AREG	0.0248618	0.668266		12	33	0	NA	0	NA	0
CLEC2B	0.0250104	0.668266		8	29	3	hetGla2;conCri1;chrAsi1	1	octDeg1	3
ELSPBP1	0.0250068	0.668266		9	30	5	perManBai1;mm10;rn6;nanGal1;conCri1	3	turTru2;orcOrc1;balAcu1	2
ZBTB32	0.0249249	0.668266		14	34	0	NA	0	NA	0
EDN3	0.0251647	0.671025		13	30	0	NA	0	NA	0
TRPM8	0.0253652	0.675002		10	28	0	NA	0	NA	0
FAM3B	0.0254408	0.675646		11	29	1	pteAle1	0	NA	1
ALPK1	0.0255893	0.67822		9	29	0	NA	0	NA	0
MYO1B	0.0260787	0.689801		11	26	1	pteAle1	0	NA	1
ANKRD10	0.026349	0.693409		12	27	0	NA	0	NA	0
C11orf84	0.026373	0.693409		14	33	0	NA	0	NA	0
PCDHA5	0.0263734	0.693409		8	18	1	triMan1	2	orcOrc1;balAcu1	1
BEST1	0.0264704	0.694379		12	30	3	nanGal1;hetGla2;myoLuc2	0	NA	3
LY6G5B	0.0265688	0.694379		14	34	2	micOch1;perManBai1	0	NA	1
P2RX5	0.0265164	0.694379		13	30	0	NA	0	NA	0
2012-09-01	0.0266356	0.694746		14	29	0	NA	0	NA	0
GSTA4	0.0267404	0.695396		13	33	2	mm10;rn6	0	NA	1
SEC24D	0.0267663	0.695396		10	27	0	NA	0	NA	0
C3orf33	0.0269112	0.69778		13	31	0	NA	0	NA	0
SPATS1	0.0271694	0.703089		12	33	0	NA	0	NA	0
C3orf67	0.0272237	0.703109		12	32	0	NA	0	NA	0
DEFB135	0.0273642	0.705351		13	26	0	NA	0	NA	0
KRBA1	0.0275955	0.709922		12	32	2	triMan1;chrAsi1	2	orcOrc1;loxAfr3	2
CDK4	0.0277208	0.710109		14	33	0	NA	0	NA	0
DNMT1	0.0276738	0.710109		11	29	0	NA	0	NA	0
PIN4	0.0278188	0.710109		13	27	0	NA	0	NA	0
PRSS56	0.0278065	0.710109		14	26	3	nanGal1;conCri1;chrAsi1	0	NA	3
ZNF548	0.0281778	0.717878		7	24	6	micOch1;perManBai1;mm10;pteAle1;myoDav1;myoLuc2	5	balAcu1;felCat8;canFam3;musFur1;odoRosDiv1	2
KLK8	0.0286451	0.728372		13	34	1	triMan1	3	turTru2;orcOrc1;balAcu1	1
LRRC63	0.0287266	0.729034		10	31	1	hetGla2	1	equCab2	1
AWAT2	0.0289913	0.730115		14	32	5	pteVam1;eptFus1;myoLuc2;triMan1;chrAsi1	1	loxAfr3	3
BRCC3	0.0289121	0.730115		14	29	0	NA	0	NA	0
FAM180B	0.0289416	0.730115		14	34	5	micOch1;perManBai1;mm10;rn6;conCri1	0	NA	2
SLC22A13	0.0288492	0.730115		13	28	2	hetGla2;triMan1	8	rhiRox1;turTru2;orcOrc1;balAcu1;panHod1;bosTau8;bisBis1;capHir1	2
MS4A12	0.0291937	0.733352		12	28	3	pteAle1;pteVam1;myoLuc2	1	balAcu1	1
PKIB	0.0292315	0.733352		14	32	0	NA	0	NA	0
SELP	0.0294003	0.736184		13	30	2	eptFus1;conCri1	0	NA	2
LELP1	0.0294785	0.736739		13	31	1	nanGal1	1	orcOrc1	1
QRFP	0.0295844	0.737981		14	34	0	NA	0	NA	0
CACNA1E	0.0298441	0.73971		9	20	0	NA	0	NA	0
CCL1	0.0297442	0.73971		13	33	3	eptFus1;myoDav1;myoLuc2	0	NA	1
FABP6	0.0298592	0.73971		14	33	2	pteAle1;pteVam1	0	NA	1
TTC6	0.0298787	0.73971		11	26	1	hetGla2	0	NA	1
RIPK4	0.0299463	0.73999		10	26	0	NA	0	NA	0
PRR30	0.0300442	0.741015		13	31	2	mm10;hetGla2	1	tarSyr2	2
ALOX15	0.0302807	0.741285		11	28	3	nanGal1;hetGla2;triMan1	3	vicPac2;orcOrc1;equCab2	3
BTC	0.0302	0.741285		10	32	0	NA	0	NA	0
PPP1R32	0.0302507	0.741285		11	30	1	hetGla2	1	cavPor3	1
TRPC3	0.0302516	0.741285		11	29	0	NA	0	NA	0
C6orf222	0.0308439	0.741429		14	32	4	eptFus1;myoDav1;myoLuc2;conCri1	0	NA	2
C6orf226	0.0307168	0.741429		13	28	0	NA	0	NA	0
CLEC19A	0.0308506	0.741429		14	33	5	mm10;rn6;hetGla2;pteVam1;conCri1	3	cavPor3;octDeg1;ochPri3	4
DEFB104A	0.0307011	0.741429		10	27	2	micOch1;perManBai1	1	tarSyr2	1
DEFB134	0.030832	0.741429		8	28	1	mm10	0	NA	1
GABRD	0.0304324	0.741429		10	28	0	NA	0	NA	0
HBQ1	0.0306447	0.741429		11	27	3	mm10;rn6;triMan1	0	NA	2
SDR16C5	0.0307322	0.741429		13	32	2	pteAle1;pteVam1	0	NA	1
TOM1	0.0308031	0.741429		11	28	0	NA	0	NA	0
VARS2	0.0307523	0.741429		10	31	0	NA	0	NA	0
NXPE4	0.0309718	0.742984		7	32	1	conCri1	6	panHod1;bosTau8;bisBis1;capHir1;felCat8;musFur1	1
BEX5	0.0318849	0.743657		9	28	2	mm10;nanGal1	0	NA	1
C22orf29	0.0314651	0.743657		11	32	11	micOch1;perManBai1;mm10;rn6;nanGal1;hetGla2;pteAle1;pteVam1;eptFus1;myoDav1;conCri1	15	tarSyr2;otoGar3;cavPor3;octDeg1;vicPac2;camFer1;panHod1;bosTau8;capHir1;equCab2;felCat8;canFam3;musFur1;odoRosDiv1;lepWed1	4
C3AR1	0.0316893	0.743657		14	34	1	conCri1	0	NA	1
CISD1	0.031591	0.743657		14	32	0	NA	0	NA	0
FCRL6	0.0312889	0.743657		12	28	10	micOch1;perManBai1;rn6;nanGal1;hetGla2;pteVam1;eptFus1;myoDav1;myoLuc2;conCri1	8	tarSyr2;otoGar3;octDeg1;ochPri3;camFer1;turTru2;orcOrc1;musFur1	4
GSDMB	0.0314876	0.743657		12	33	10	mm10;rn6;nanGal1;hetGla2;pteVam1;eptFus1;myoDav1;myoLuc2;conCri1;triMan1	22	rheMac3;macFas5;papAnu2;chlSab2;rhiRox1;calJac3;saiBol1;otoGar3;speTri2;cavPor3;octDeg1;oryCun2;ochPri3;vicPac2;turTru2;orcOrc1;balAcu1;felCat8;canFam3;musFur1;odoRosDiv1;lepWed1	5
HEPACAM2	0.031886	0.743657		13	32	0	NA	0	NA	0
KIAA1524	0.0318828	0.743657		13	32	0	NA	0	NA	0
PCSK4	0.0311372	0.743657		12	23	1	hetGla2	1	panPan1	1
PGBD2	0.0315091	0.743657		9	26	4	perManBai1;mm10;eptFus1;myoDav1	0	NA	2
PLAC1	0.031905	0.743657		13	32	0	NA	0	NA	0
PTGR2	0.0314057	0.743657		14	33	2	pteAle1;pteVam1	0	NA	1
SLC35G6	0.03185	0.743657		12	32	2	eptFus1;myoLuc2	1	vicPac2	1
TAF7L	0.0311442	0.743657		13	31	3	nanGal1;hetGla2;conCri1	2	octDeg1;felCat8	3
TIFAB	0.0312668	0.743657		13	34	2	hetGla2;triMan1	0	NA	2
TMEM120B	0.0317436	0.743657		12	25	1	conCri1	0	NA	1
LBHD1	0.0319753	0.743976		13	33	8	micOch1;nanGal1;hetGla2;eptFus1;myoDav1;myoLuc2;conCri1;chrAsi1	8	rheMac3;macFas5;papAnu2;chlSab2;rhiRox1;speTri2;cavPor3;octDeg1	5
ANGPTL3	0.0321363	0.746402		12	29	0	NA	0	NA	0
GRTP1	0.032297	0.748813		11	26	0	NA	0	NA	0
TMEM244	0.0324734	0.751576		13	32	9	micOch1;perManBai1;mm10;hetGla2;pteAle1;eptFus1;conCri1;triMan1;chrAsi1	3	otoGar3;canFam3;odoRosDiv1	6
APMAP	0.0325688	0.75246		13	31	2	pteAle1;pteVam1	0	NA	1
AQP3	0.0328109	0.752578		13	34	0	NA	0	NA	0
ARHGEF4	0.0330569	0.752578		13	27	4	eptFus1;myoDav1;myoLuc2;chrAsi1	0	NA	2
CHST9	0.033027	0.752578		12	33	0	NA	0	NA	0
DENND1C	0.0333754	0.752578		12	29	0	NA	0	NA	0
GDPD2	0.0331781	0.752578		14	33	0	NA	0	NA	0
KLF11	0.0328079	0.752578		13	33	0	NA	0	NA	0
LRRC30	0.0328083	0.752578		13	33	0	NA	0	NA	0
NCOA7	0.0332502	0.752578		13	33	0	NA	0	NA	0
NPS	0.0332997	0.752578		13	32	0	NA	1	orcOrc1	0
PCDHA4	0.033082	0.752578		9	20	1	triMan1	0	NA	1
PLCG2	0.0330187	0.752578		13	25	0	NA	0	NA	0
TEK	0.0332422	0.752578		13	28	0	NA	0	NA	0
TIMM50	0.0327357	0.752578		13	34	0	NA	0	NA	0
TMEM173	0.0333323	0.752578		14	33	0	NA	0	NA	0
DDHD2	0.0335451	0.753818		12	29	0	NA	0	NA	0
GLB1L3	0.0335407	0.753818		11	25	1	nanGal1	0	NA	1
ACRV1	0.0356493	0.754326		12	32	0	NA	0	NA	0
AKAP2	0.0352139	0.754326		13	30	0	NA	0	NA	0
APBB2	0.0352474	0.754326		12	30	0	NA	0	NA	0
ARHGAP36	0.0346762	0.754326		14	30	2	pteAle1;pteVam1	0	NA	1
BBX	0.0344196	0.754326		13	32	0	NA	0	NA	0
C18orf21	0.0339511	0.754326		11	30	0	NA	0	NA	0
C1orf177	0.0349171	0.754326		14	34	2	nanGal1;hetGla2	2	turTru2;balAcu1	2
CCR9	0.0341148	0.754326		12	34	0	NA	0	NA	0
CD164	0.0356762	0.754326		14	31	0	NA	0	NA	0
CPA5	0.0356231	0.754326		13	33	1	hetGla2	0	NA	1
DDX58	0.0345003	0.754326		12	30	2	conCri1;chrAsi1	3	turTru2;orcOrc1;balAcu1	2
EFHB	0.0352325	0.754326		11	24	0	NA	0	NA	0
GABRR2	0.0351302	0.754326		13	32	2	nanGal1;chrAsi1	0	NA	2
GLIPR1	0.0339957	0.754326		13	32	0	NA	0	NA	0
HRSP12	0.0353927	0.754326		14	33	0	NA	0	NA	0
IGSF1	0.0343632	0.754326		13	26	1	myoDav1	0	NA	1
KIAA1217	0.0340434	0.754326		11	28	0	NA	0	NA	0
KIFC1	0.0342261	0.754326		13	28	0	NA	0	NA	0
KRT72	0.0340299	0.754326		12	26	0	NA	0	NA	0
KRTAP10_8	0.0354682	0.754326		10	23	7	rn6;hetGla2;pteVam1;eptFus1;myoLuc2;triMan1;chrAsi1	4	turTru2;orcOrc1;cerSim1;loxAfr3	5
LAMP1	0.0354076	0.754326		13	33	3	eptFus1;myoDav1;myoLuc2	0	NA	1
MGAT4C	0.0343413	0.754326		12	33	0	NA	0	NA	0
MGAT5B	0.0347841	0.754326		10	23	0	NA	0	NA	0
NANOS3	0.033893	0.754326		14	32	0	NA	0	NA	0
NOVA1	0.0356907	0.754326		10	29	0	NA	0	NA	0
NPL	0.0336558	0.754326		12	32	0	NA	0	NA	0
NR1I3	0.0349513	0.754326		14	34	3	eptFus1;myoDav1;conCri1	3	turTru2;orcOrc1;balAcu1	2
NXT2	0.0347367	0.754326		13	32	0	NA	0	NA	0
OBP2A	0.0344477	0.754326		9	21	3	pteAle1;pteVam1;triMan1	6	panTro4;rhiRox1;canFam3;musFur1;odoRosDiv1;lepWed1	2
PNPLA7	0.0347781	0.754326		7	23	1	hetGla2	5	ponAbe2;otoGar3;turTru2;orcOrc1;balAcu1	1
PTAFR	0.0349014	0.754326		14	32	0	NA	0	NA	0
SETD2	0.0348182	0.754326		10	25	1	pteAle1	0	NA	1
SLC25A21	0.0338436	0.754326		14	30	0	NA	0	NA	0
SLC39A14	0.0354178	0.754326		13	31	0	NA	0	NA	0
SPAG11A	0.0353736	0.754326		11	31	3	micOch1;perManBai1;hetGla2	1	tarSyr2	2
SPINK9	0.0337881	0.754326		9	34	5	perManBai1;mm10;hetGla2;pteAle1;pteVam1	6	otoGar3;octDeg1;vicPac2;camFer1;turTru2;orcOrc1	3
TSC1	0.0346365	0.754326		11	30	0	NA	0	NA	0
RAD51AP1	0.0357699	0.754785		13	32	0	NA	0	NA	0
COMMD3_BMI1	0.0359243	0.756829		13	32	0	NA	0	NA	0
DNAI1	0.0362179	0.761793		13	31	0	NA	0	NA	0
CTSW	0.0363592	0.763544		13	31	0	NA	0	NA	0
TULP1	0.0364706	0.764661		11	29	1	triMan1	0	NA	1
DNMT3B	0.0367718	0.764978		13	32	0	NA	0	NA	0
IQCE	0.0366078	0.764978		8	25	2	nanGal1;chrAsi1	2	tarSyr2;otoGar3	2
LIN7B	0.0367306	0.764978		11	28	0	NA	0	NA	0
PODXL2	0.0367767	0.764978		14	27	0	NA	0	NA	0
USP33	0.0365544	0.764978		13	31	0	NA	0	NA	0
AP1G2	0.0369768	0.767926		13	34	1	triMan1	0	NA	1
CLCA2	0.0371149	0.769579		13	29	2	pteAle1;pteVam1	1	ochPri3	1
MANSC1	0.0372554	0.769892		13	33	0	NA	0	NA	0
MC3R	0.0373182	0.769892		12	31	0	NA	0	NA	0
PRPF4	0.0373643	0.769892		12	30	1	pteAle1	0	NA	1
VIL1	0.0373422	0.769892		12	29	0	NA	0	NA	0
SLC7A6	0.0374721	0.770904		12	31	0	NA	0	NA	0
TCL1B	0.0375418	0.771132		8	31	4	hetGla2;pteAle1;pteVam1;chrAsi1	3	cavPor3;octDeg1;oryCun2	3
COMMD3	0.0377169	0.77352		13	31	1	conCri1	0	NA	1
BCKDHB	0.0378021	0.77406		10	28	0	NA	0	NA	0
CD96	0.038	0.776903		10	30	1	hetGla2	3	calJac3;turTru2;orcOrc1	1
DMRT1	0.0381457	0.778671		11	23	2	myoDav1;myoLuc2	0	NA	1
FOLR2	0.0383092	0.780795		13	33	4	nanGal1;hetGla2;eptFus1;conCri1	3	cavPor3;octDeg1;ochPri3	4
AMDHD1	0.0384612	0.78147		13	33	1	pteAle1	0	NA	1
TMCO5A	0.0384196	0.78147		13	31	1	hetGla2	0	NA	1
ACOT13	0.039856	0.786881		14	30	0	NA	0	NA	0
ACRBP	0.0399314	0.786881		13	31	0	NA	0	NA	0
ALDH8A1	0.0400438	0.786881		13	32	1	pteAle1	0	NA	1
ASB18	0.0393246	0.786881		13	22	1	conCri1	0	NA	1
ASCL4	0.039728	0.786881		12	26	1	hetGla2	0	NA	1
ERICH4	0.0402562	0.786881		12	28	0	NA	0	NA	0
EXOC1	0.0392024	0.786881		12	30	0	NA	0	NA	0
FAM177B	0.0394334	0.786881		13	28	6	mm10;rn6;pteAle1;pteVam1;myoDav1;myoLuc2	1	octDeg1	2
GPR84	0.0391315	0.786881		14	34	2	pteAle1;pteVam1	0	NA	1
HES2	0.0388164	0.786881		10	24	0	NA	0	NA	0
HIST1H3E	0.0393754	0.786881		10	26	0	NA	0	NA	0
KAAG1	0.0402838	0.786881		13	30	2	myoLuc2;chrAsi1	6	saiBol1;vicPac2;camFer1;turTru2;orcOrc1;balAcu1	2
KRTAP12_2	0.0401906	0.786881		7	27	2	pteAle1;chrAsi1	6	rheMac3;macFas5;papAnu2;chlSab2;otoGar3;lepWed1	2
LCA5	0.0397153	0.786881		13	30	0	NA	0	NA	0
LYZL4	0.0396081	0.786881		13	32	1	hetGla2	0	NA	1
PALM2_AKAP2	0.0397284	0.786881		13	30	1	mm10	0	NA	1
PHGR1	0.0400721	0.786881		14	29	5	eptFus1;myoDav1;myoLuc2;conCri1;chrAsi1	2	orcOrc1;balAcu1	3
PYCR1	0.0399109	0.786881		13	31	0	NA	0	NA	0
RAD51D	0.038965	0.786881		13	30	0	NA	0	NA	0
SERPINB12	0.0398194	0.786881		13	31	1	triMan1	1	balAcu1	1
SLC25A29	0.0401832	0.786881		12	28	0	NA	0	NA	0
STAT3	0.0401573	0.786881		13	29	0	NA	0	NA	0
UHRF1BP1	0.039883	0.786881		13	32	0	NA	0	NA	0
ZAR1L	0.039483	0.786881		10	29	1	chrAsi1	0	NA	1
ZC3H12B	0.0397206	0.786881		11	31	0	NA	0	NA	0
ZKSCAN3	0.0397287	0.786881		9	25	1	pteAle1	1	cavPor3	1
IFNG	0.0403454	0.786915		14	34	0	NA	0	NA	0
WDSUB1	0.0405453	0.789642		13	30	0	NA	0	NA	0
ANKRD35	0.0410291	0.794086		13	28	1	triMan1	0	NA	1
APLN	0.0412567	0.794086		13	30	9	micOch1;mm10;rn6;nanGal1;hetGla2;myoDav1;conCri1;triMan1;chrAsi1	14	octDeg1;oryCun2;ochPri3;vicPac2;camFer1;orcOrc1;balAcu1;panHod1;bosTau8;capHir1;equCab2;cerSim1;musFur1;loxAfr3	6
C21orf91	0.0411434	0.794086		13	33	0	NA	0	NA	0
HRH1	0.0411434	0.794086		13	33	0	NA	0	NA	0
IL18BP	0.041133	0.794086		14	33	0	NA	0	NA	0
NFE2L1	0.0410471	0.794086		14	33	0	NA	0	NA	0
OTUD6A	0.0408956	0.794086		14	24	1	nanGal1	0	NA	1
VCAN	0.0412017	0.794086		13	32	1	conCri1	1	tarSyr2	1
TEX22	0.0413243	0.794224		9	21	1	hetGla2	0	NA	1
A1CF	0.571025	0.794951		11	31	0	NA	0	NA	0
A3GALT2	0.402845	0.794951		13	23	0	NA	1	bosTau8	0
A4GALT	0.343341	0.794951		12	30	1	myoDav1	0	NA	1
A4GNT	0.506144	0.794951		13	33	0	NA	0	NA	0
AACS	0.332398	0.794951		9	28	0	NA	1	papAnu2	0
AADAC	0.118269	0.794951		10	27	4	nanGal1;pteVam1;eptFus1;triMan1	2	balAcu1;felCat8	3
AAED1	0.574561	0.794951		11	18	0	NA	1	otoGar3	0
AAGAB	0.432463	0.794951		13	32	0	NA	0	NA	0
AAK1	0.581093	0.794951		10	32	1	conCri1	1	camFer1	1
AANAT	0.216815	0.794951		11	32	1	triMan1	2	orcOrc1;balAcu1	1
AARD	0.116874	0.794951		10	23	2	hetGla2;chrAsi1	2	tarSyr2;otoGar3	2
AASDH	0.504876	0.794951		12	31	0	NA	0	NA	0
AASDHPPT	0.515839	0.794951		13	32	0	NA	0	NA	0
AASS	0.52324	0.794951		11	31	0	NA	0	NA	0
AATF	0.342092	0.794951		14	31	0	NA	0	NA	0
ABCA1	0.381558	0.794951		14	29	1	myoDav1	0	NA	1
ABCA12	0.481219	0.794951		12	29	0	NA	0	NA	0
ABCA13	0.529801	0.794951		9	26	2	rn6;triMan1	6	rheMac3;oryCun2;ochPri3;orcOrc1;balAcu1;loxAfr3	2
ABCA4	0.20069	0.794951		9	30	1	chrAsi1	1	speTri2	1
ABCA5	0.527145	0.794951		12	27	0	NA	1	rheMac3	0
ABCA6	0.227172	0.794951		11	28	3	eptFus1;myoDav1;myoLuc2	2	balAcu1;capHir1	1
ABCA7	0.613387	0.794951		11	25	4	perManBai1;nanGal1;hetGla2;myoDav1	10	octDeg1;vicPac2;camFer1;turTru2;orcOrc1;balAcu1;cerSim1;felCat8;odoRosDiv1;lepWed1	3
ABCA9	0.13699	0.794951		11	26	2	myoDav1;triMan1	6	calJac3;saiBol1;otoGar3;oryCun2;vicPac2;camFer1	2
ABCB11	0.526169	0.794951		13	28	0	NA	0	NA	0
ABCB6	0.533677	0.794951		12	31	0	NA	1	turTru2	0
ABCB7	0.304379	0.794951		12	27	0	NA	0	NA	0
ABCB8	0.0509704	0.794951		13	32	0	NA	0	NA	0
ABCB9	0.507519	0.794951		11	30	0	NA	0	NA	0
ABCC1	0.438868	0.794951		12	30	1	rn6	0	NA	1
ABCC10	0.575385	0.794951		12	32	0	NA	0	NA	0
ABCC11	0.0922076	0.794951		9	30	7	perManBai1;mm10;rn6;nanGal1;hetGla2;pteAle1;myoDav1	6	speTri2;cavPor3;octDeg1;vicPac2;orcOrc1;balAcu1	3
ABCC12	0.295059	0.794951		12	33	6	mm10;rn6;hetGla2;pteAle1;pteVam1;conCri1	18	calJac3;saiBol1;otoGar3;speTri2;camFer1;turTru2;orcOrc1;balAcu1;panHod1;bosTau8;bisBis1;capHir1;equCab2;felCat8;musFur1;odoRosDiv1;lepWed1;loxAfr3	4
ABCC2	0.47557	0.794951		12	27	0	NA	0	NA	0
ABCC3	0.535164	0.794951		12	33	0	NA	0	NA	0
ABCC5	0.592488	0.794951		10	29	0	NA	0	NA	0
ABCC8	0.512546	0.794951		11	28	0	NA	1	turTru2	0
ABCC9	0.616874	0.794951		10	24	0	NA	0	NA	0
ABCD1	0.47133	0.794951		14	26	0	NA	0	NA	0
ABCD3	0.603304	0.794951		10	33	0	NA	1	rheMac3	0
ABCD4	0.565361	0.794951		12	33	0	NA	0	NA	0
ABCF1	0.498177	0.794951		13	28	0	NA	1	papAnu2	0
ABCF2	0.503845	0.794951		13	32	0	NA	1	rheMac3	0
ABCG1	0.525032	0.794951		12	30	0	NA	0	NA	0
ABCG2	0.352918	0.794951		9	28	1	myoDav1	0	NA	1
ABCG4	0.509507	0.794951		13	32	0	NA	0	NA	0
ABHD1	0.25795	0.794951		14	33	2	triMan1;chrAsi1	5	papAnu2;turTru2;orcOrc1;musFur1;odoRosDiv1	2
ABHD11	0.352013	0.794951		13	31	0	NA	0	NA	0
ABHD12	0.561719	0.794951		13	30	0	NA	0	NA	0
ABHD12B	0.51958	0.794951		12	32	0	NA	1	turTru2	0
ABHD13	0.530971	0.794951		13	33	0	NA	1	panHod1	0
ABHD15	0.300562	0.794951		11	25	0	NA	0	NA	0
ABHD16B	0.118409	0.794951		11	20	0	NA	1	orcOrc1	0
ABHD17A	0.500504	0.794951		14	27	0	NA	0	NA	0
ABHD6	0.569601	0.794951		13	32	0	NA	0	NA	0
ABHD8	0.542603	0.794951		11	29	0	NA	0	NA	0
ABI1	0.187159	0.794951		14	32	0	NA	0	NA	0
ABI2	0.569618	0.794951		13	32	0	NA	0	NA	0
ABI3BP	0.337105	0.794951		10	28	6	micOch1;perManBai1;mm10;rn6;nanGal1;hetGla2	5	panTro4;speTri2;cavPor3;octDeg1;turTru2	2
ABL1	0.501342	0.794951		13	26	0	NA	0	NA	0
ABL2	0.599925	0.794951		13	30	0	NA	0	NA	0
ABR	0.501437	0.794951		11	28	0	NA	0	NA	0
ABRA	0.532678	0.794951		13	33	0	NA	1	capHir1	0
ABT1	0.455508	0.794951		14	34	0	NA	0	NA	0
AC002365.5	0.274674	0.794951		7	26	2	perManBai1;pteAle1	4	ponAbe2;tarSyr2;cavPor3;bosTau8	2
AC004381.6	0.3743	0.794951		14	30	3	perManBai1;eptFus1;myoLuc2	1	octDeg1	2
AC004754.3	0.158101	0.794951		11	29	0	NA	0	NA	0
AC005480.1	0.463111	0.794951		13	27	13	micOch1;perManBai1;mm10;rn6;nanGal1;hetGla2;pteAle1;pteVam1;eptFus1;myoDav1;myoLuc2;conCri1;chrAsi1	19	calJac3;tarSyr2;otoGar3;speTri2;cavPor3;ochPri3;vicPac2;camFer1;turTru2;orcOrc1;balAcu1;panHod1;bisBis1;equCab2;cerSim1;felCat8;canFam3;musFur1;lepWed1	5
AC006157.1	0.532266	0.794951		14	30	0	NA	0	NA	0
AC006157.2	0.573885	0.794951		14	32	0	NA	1	camFer1	0
AC006449.2	0.387223	0.794951		13	31	8	perManBai1;mm10;nanGal1;hetGla2;pteAle1;pteVam1;triMan1;chrAsi1	20	rheMac3;macFas5;papAnu2;chlSab2;rhiRox1;calJac3;otoGar3;speTri2;cavPor3;octDeg1;vicPac2;camFer1;turTru2;orcOrc1;balAcu1;equCab2;canFam3;musFur1;odoRosDiv1;lepWed1	5
AC006547.14	0.534884	0.794951		12	26	2	micOch1;perManBai1	0	NA	1
AC009336.19	0.553929	0.794951		11	21	0	NA	0	NA	0
AC010287.1	0.52218	0.794951		10	31	10	micOch1;perManBai1;mm10;nanGal1;hetGla2;pteAle1;pteVam1;eptFus1;myoDav1;myoLuc2	21	papAnu2;chlSab2;rhiRox1;calJac3;saiBol1;tarSyr2;otoGar3;octDeg1;oryCun2;ochPri3;vicPac2;turTru2;orcOrc1;balAcu1;panHod1;bosTau8;bisBis1;capHir1;equCab2;musFur1;odoRosDiv1	3
AC010642.1	0.401366	0.794951		9	31	2	pteAle1;pteVam1	21	rheMac3;macFas5;papAnu2;chlSab2;rhiRox1;calJac3;saiBol1;tarSyr2;otoGar3;octDeg1;oryCun2;ochPri3;orcOrc1;balAcu1;panHod1;bosTau8;bisBis1;equCab2;felCat8;musFur1;lepWed1	1
AC010889.1	0.457827	0.794951		13	20	1	myoDav1	0	NA	1
AC013412.1	0.413596	0.794951		14	28	0	NA	0	NA	0
AC037459.4	0.378299	0.794951		14	31	0	NA	0	NA	0
AC044839.1	0.51928	0.794951		12	33	9	perManBai1;mm10;rn6;nanGal1;pteVam1;eptFus1;myoDav1;myoLuc2;conCri1	22	rheMac3;macFas5;papAnu2;chlSab2;rhiRox1;calJac3;saiBol1;speTri2;cavPor3;octDeg1;ochPri3;vicPac2;camFer1;turTru2;orcOrc1;balAcu1;bisBis1;equCab2;felCat8;musFur1;odoRosDiv1;lepWed1	3
AC069063.2	0.205459	0.794951		10	31	7	micOch1;perManBai1;mm10;nanGal1;hetGla2;myoLuc2;conCri1	4	otoGar3;octDeg1;ochPri3;odoRosDiv1	4
AC087762.1	0.614111	0.794951		7	30	7	mm10;rn6;nanGal1;hetGla2;pteAle1;myoDav1;conCri1	25	panPan1;ponAbe2;rheMac3;macFas5;papAnu2;chlSab2;rhiRox1;calJac3;saiBol1;tarSyr2;otoGar3;cavPor3;octDeg1;oryCun2;ochPri3;vicPac2;camFer1;orcOrc1;balAcu1;panHod1;capHir1;cerSim1;canFam3;musFur1;lepWed1	4
AC092835.2	0.42526	0.794951		13	32	1	mm10	0	NA	1
AC104532.2	0.576609	0.794951		12	27	0	NA	1	otoGar3	0
AC110615.1	0.137861	0.794951		14	33	4	nanGal1;pteAle1;pteVam1;myoLuc2	9	ochPri3;vicPac2;camFer1;turTru2;orcOrc1;balAcu1;bosTau8;bisBis1;capHir1	2
AC114494.1	0.338483	0.794951		12	33	10	micOch1;mm10;rn6;nanGal1;hetGla2;pteAle1;pteVam1;eptFus1;myoDav1;myoLuc2	15	chlSab2;calJac3;saiBol1;speTri2;cavPor3;oryCun2;orcOrc1;balAcu1;panHod1;bosTau8;bisBis1;capHir1;equCab2;cerSim1;odoRosDiv1	3
AC129492.1	0.182688	0.794951		13	30	7	pteAle1;eptFus1;myoDav1;myoLuc2;conCri1;triMan1;chrAsi1	14	vicPac2;turTru2;orcOrc1;balAcu1;panHod1;bosTau8;bisBis1;capHir1;equCab2;cerSim1;musFur1;odoRosDiv1;lepWed1;loxAfr3	4
AC135068.1	0.443056	0.794951		11	21	0	NA	1	ponAbe2	0
ACACA	0.52308	0.794951		14	30	0	NA	1	turTru2	0
ACACB	0.450402	0.794951		13	21	1	myoDav1	0	NA	1
ACAD10	0.553004	0.794951		13	24	2	pteAle1;pteVam1	5	felCat8;canFam3;musFur1;odoRosDiv1;lepWed1	1
ACAD11	0.266556	0.794951		11	27	1	pteVam1	0	NA	1
ACAD9	0.0853072	0.794951		7	25	0	NA	0	NA	0
ACADM	0.609736	0.794951		12	27	0	NA	0	NA	0
ACADS	0.418022	0.794951		13	32	0	NA	0	NA	0
ACADSB	0.174127	0.794951		12	30	0	NA	0	NA	0
ACADVL	0.50781	0.794951		14	32	0	NA	1	turTru2	0
ACAP1	0.539438	0.794951		14	28	0	NA	0	NA	0
ACAP2	0.468784	0.794951		13	29	1	myoLuc2	1	turTru2	1
ACAP3	0.372963	0.794951		10	21	1	myoDav1	0	NA	1
ACBD3	0.500292	0.794951		12	32	0	NA	0	NA	0
ACBD4	0.572536	0.794951		13	34	0	NA	1	turTru2	0
ACBD5	0.542235	0.794951		12	29	0	NA	0	NA	0
ACCS	0.404519	0.794951		12	30	1	pteVam1	0	NA	1
ACD	0.342956	0.794951		13	33	5	perManBai1;mm10;rn6;nanGal1;hetGla2	4	speTri2;cavPor3;octDeg1;oryCun2	2
ACE2	0.444189	0.794951		13	27	0	NA	0	NA	0
ACER1	0.611662	0.794951		14	29	0	NA	0	NA	0
ACER2	0.31281	0.794951		13	30	1	eptFus1	0	NA	1
ACER3	0.390188	0.794951		11	29	0	NA	0	NA	0
ACHE	0.442624	0.794951		14	30	0	NA	0	NA	0
ACIN1	0.396877	0.794951		13	30	0	NA	0	NA	0
ACKR1	0.374597	0.794951		13	33	0	NA	0	NA	0
ACKR2	0.543165	0.794951		13	32	0	NA	0	NA	0
ACKR4	0.507985	0.794951		14	34	0	NA	1	turTru2	0
ACLY	0.509974	0.794951		14	29	0	NA	1	turTru2	0
ACMSD	0.114021	0.794951		13	31	1	pteAle1	0	NA	1
ACN9	0.613116	0.794951		12	31	0	NA	0	NA	0
ACO1	0.544657	0.794951		10	28	0	NA	0	NA	0
ACO2	0.400004	0.794951		13	28	0	NA	0	NA	0
ACOT1	0.542775	0.794951		11	18	0	NA	1	lepWed1	0
ACOT4	0.45698	0.794951		8	22	0	NA	1	calJac3	0
ACOX1	0.442086	0.794951		14	29	0	NA	0	NA	0
ACOX2	0.397865	0.794951		12	32	0	NA	0	NA	0
ACOX3	0.568509	0.794951		9	23	0	NA	1	chlSab2	0
ACP5	0.51136	0.794951		12	27	0	NA	1	turTru2	0
ACP6	0.525907	0.794951		14	33	0	NA	0	NA	0
ACPP	0.393595	0.794951		13	32	0	NA	0	NA	0
ACSBG1	0.0568465	0.794951		11	30	2	pteVam1;myoLuc2	0	NA	1
ACSF2	0.506884	0.794951		12	33	0	NA	0	NA	0
ACSF3	0.537246	0.794951		12	28	0	NA	0	NA	0
ACSL1	0.595645	0.794951		12	32	0	NA	0	NA	0
ACSL3	0.507104	0.794951		13	32	0	NA	1	bosTau8	0
ACSL4	0.587465	0.794951		12	29	0	NA	0	NA	0
ACSL5	0.437304	0.794951		14	31	1	rn6	0	NA	1
ACSL6	0.226495	0.794951		12	29	0	NA	0	NA	0
ACSM1	0.173268	0.794951		10	19	0	NA	0	NA	0
ACSM2A	0.606571	0.794951		12	25	2	pteAle1;myoDav1	1	cerSim1	1
ACSM5	0.236782	0.794951		11	30	2	myoDav1;myoLuc2	2	turTru2;orcOrc1	1
ACSS1	0.55485	0.794951		12	30	0	NA	0	NA	0
ACSS2	0.500888	0.794951		14	31	0	NA	0	NA	0
ACSS3	0.53222	0.794951		12	30	0	NA	0	NA	0
ACTA2	0.439917	0.794951		13	33	0	NA	0	NA	0
ACTB	0.505342	0.794951		12	31	0	NA	1	rheMac3	0
ACTBL2	0.451177	0.794951		11	32	0	NA	1	orcOrc1	0
ACTG2	0.522906	0.794951		14	32	0	NA	0	NA	0
ACTL6B	0.531525	0.794951		14	31	0	NA	0	NA	0
ACTL7A	0.574751	0.794951		14	33	0	NA	0	NA	0
ACTL8	0.0695813	0.794951		11	31	3	micOch1;mm10;rn6	0	NA	1
ACTN2	0.483439	0.794951		10	31	0	NA	0	NA	0
ACTN3	0.434807	0.794951		14	31	0	NA	0	NA	0
ACTR10	0.0624496	0.794951		13	29	1	conCri1	0	NA	1
ACTR1B	0.5079	0.794951		14	33	0	NA	0	NA	0
ACTR2	0.500278	0.794951		12	29	0	NA	0	NA	0
ACTR5	0.522809	0.794951		11	25	0	NA	0	NA	0
ACTR6	0.507016	0.794951		14	32	0	NA	0	NA	0
ACVR2B	0.414197	0.794951		12	32	0	NA	0	NA	0
ACVRL1	0.560833	0.794951		14	31	0	NA	1	capHir1	0
ACY1	0.551877	0.794951		14	32	0	NA	0	NA	0
AD000671.6	0.481428	0.794951		14	32	13	micOch1;perManBai1;mm10;rn6;nanGal1;hetGla2;pteAle1;pteVam1;eptFus1;myoDav1;myoLuc2;triMan1;chrAsi1	17	tarSyr2;otoGar3;speTri2;cavPor3;octDeg1;oryCun2;ochPri3;panHod1;bosTau8;bisBis1;capHir1;equCab2;cerSim1;canFam3;musFur1;lepWed1;loxAfr3	5
ADA	0.277261	0.794951		13	31	1	triMan1	1	rheMac3	1
ADAD1	0.578701	0.794951		14	29	0	NA	0	NA	0
ADAD2	0.269977	0.794951		12	31	0	NA	1	bisBis1	0
ADAL	0.4404	0.794951		13	30	0	NA	0	NA	0
ADAM10	0.573767	0.794951		13	29	0	NA	0	NA	0
ADAM11	0.52496	0.794951		11	29	0	NA	1	odoRosDiv1	0
ADAM12	0.302676	0.794951		11	28	1	myoDav1	0	NA	1
ADAM15	0.501256	0.794951		12	32	0	NA	0	NA	0
ADAM18	0.237845	0.794951		9	22	1	hetGla2	1	rheMac3	1
ADAM19	0.531541	0.794951		13	30	0	NA	0	NA	0
ADAM20	0.522539	0.794951		11	28	0	NA	1	orcOrc1	0
ADAM22	0.446166	0.794951		13	26	0	NA	0	NA	0
ADAM23	0.262571	0.794951		12	29	0	NA	0	NA	0
ADAM29	0.0718409	0.794951		11	29	2	hetGla2;pteVam1	0	NA	2
ADAM33	0.0563263	0.794951		11	28	0	NA	0	NA	0
ADAM7	0.562725	0.794951		11	31	0	NA	1	orcOrc1	0
ADAM8	0.457775	0.794951		13	22	0	NA	0	NA	0
ADAMDEC1	0.409256	0.794951		14	31	0	NA	0	NA	0
ADAMTS12	0.616203	0.794951		8	22	0	NA	0	NA	0
ADAMTS13	0.55989	0.794951		9	22	3	myoDav1;triMan1;chrAsi1	5	cavPor3;octDeg1;felCat8;odoRosDiv1;loxAfr3	3
ADAMTS14	0.541965	0.794951		11	31	0	NA	0	NA	0
ADAMTS16	0.577304	0.794951		10	25	0	NA	0	NA	0
ADAMTS17	0.0470521	0.794951		10	24	0	NA	0	NA	0
ADAMTS18	0.5928	0.794951		12	29	0	NA	0	NA	0
ADAMTS2	0.589993	0.794951		12	28	0	NA	0	NA	0
ADAMTS5	0.502669	0.794951		11	25	0	NA	1	papAnu2	0
ADAMTS6	0.434069	0.794951		13	27	0	NA	0	NA	0
ADAMTS9	0.405433	0.794951		12	28	0	NA	0	NA	0
ADAMTSL1	0.100986	0.794951		13	27	3	rn6;hetGla2;myoDav1	0	NA	3
ADAMTSL3	0.524716	0.794951		8	23	0	NA	0	NA	0
ADAP2	0.460845	0.794951		13	31	1	rn6	0	NA	1
ADAR	0.226108	0.794951		14	31	1	pteVam1	0	NA	1
ADAT1	0.526693	0.794951		14	30	0	NA	0	NA	0
ADAT2	0.489432	0.794951		14	31	0	NA	0	NA	0
ADCK4	0.314554	0.794951		13	31	0	NA	0	NA	0
ADCK5	0.520348	0.794951		12	30	0	NA	0	NA	0
ADCY2	0.501676	0.794951		11	24	0	NA	0	NA	0
ADCY4	0.498413	0.794951		13	31	0	NA	0	NA	0
ADCY7	0.0475095	0.794951		11	26	0	NA	0	NA	0
ADCY8	0.311124	0.794951		11	20	0	NA	0	NA	0
ADCY9	0.613829	0.794951		12	29	0	NA	0	NA	0
ADCYAP1	0.500291	0.794951		13	31	0	NA	0	NA	0
ADD2	0.432347	0.794951		13	33	0	NA	0	NA	0
ADD3	0.574134	0.794951		12	32	0	NA	0	NA	0
ADH1A	0.306065	0.794951		7	23	1	eptFus1	2	rheMac3;balAcu1	1
ADH5	0.525228	0.794951		11	29	0	NA	0	NA	0
ADHFE1	0.533182	0.794951		13	30	0	NA	0	NA	0
ADIG	0.236042	0.794951		14	33	2	nanGal1;hetGla2	1	cavPor3	2
ADIPOR1	0.524011	0.794951		13	32	0	NA	1	capHir1	0
ADIPOR2	0.507881	0.794951		14	32	0	NA	1	turTru2	0
ADIRF	0.266496	0.794951		12	33	0	NA	0	NA	0
ADM	0.571316	0.794951		14	32	0	NA	0	NA	0
ADM5	0.182849	0.794951		12	32	11	micOch1;perManBai1;mm10;nanGal1;hetGla2;pteAle1;myoDav1;myoLuc2;conCri1;triMan1;chrAsi1	17	calJac3;otoGar3;speTri2;oryCun2;ochPri3;vicPac2;orcOrc1;balAcu1;panHod1;bosTau8;bisBis1;capHir1;equCab2;cerSim1;felCat8;musFur1;loxAfr3	6
ADNP	0.510138	0.794951		12	33	0	NA	1	orcOrc1	0
ADNP2	0.356067	0.794951		9	32	0	NA	0	NA	0
ADORA2B	0.0885396	0.794951		12	24	0	NA	0	NA	0
ADORA3	0.570737	0.794951		13	32	0	NA	0	NA	0
ADPGK	0.515971	0.794951		13	32	0	NA	1	panTro4	0
ADPRH	0.320049	0.794951		13	33	0	NA	0	NA	0
ADPRHL1	0.506722	0.794951		12	30	0	NA	0	NA	0
ADPRM	0.570738	0.794951		13	34	0	NA	0	NA	0
ADRBK1	0.526617	0.794951		12	27	0	NA	0	NA	0
ADRBK2	0.0861311	0.794951		11	27	0	NA	0	NA	0
ADRM1	0.544777	0.794951		13	30	0	NA	1	odoRosDiv1	0
ADSS	0.463223	0.794951		13	31	0	NA	0	NA	0
ADSSL1	0.490042	0.794951		12	28	0	NA	1	turTru2	0
AEBP1	0.1003	0.794951		13	25	0	NA	0	NA	0
AEN	0.531372	0.794951		13	30	0	NA	1	papAnu2	0
AES	0.509766	0.794951		13	20	0	NA	0	NA	0
AFAP1	0.507193	0.794951		11	30	0	NA	0	NA	0
AFAP1L2	0.578133	0.794951		13	32	0	NA	0	NA	0
AFF2	0.56294	0.794951		10	25	0	NA	0	NA	0
AFF3	0.543235	0.794951		10	22	2	rn6;myoDav1	4	rheMac3;oryCun2;ochPri3;camFer1	2
AFF4	0.129099	0.794951		12	31	0	NA	0	NA	0
AFG3L2	0.549286	0.794951		12	28	0	NA	0	NA	0
AFM	0.153756	0.794951		10	31	3	hetGla2;conCri1;triMan1	1	loxAfr3	3
AFMID	0.0674901	0.794951		11	27	0	NA	0	NA	0
AGAP1	0.594461	0.794951		10	26	0	NA	1	panHod1	0
AGAP2	0.537242	0.794951		12	29	0	NA	0	NA	0
AGAP3	0.614922	0.794951		12	31	0	NA	1	felCat8	0
AGBL1	0.0955969	0.794951		12	25	1	pteAle1	0	NA	1
AGBL2	0.149494	0.794951		12	29	0	NA	0	NA	0
AGBL3	0.257813	0.794951		11	29	1	nanGal1	2	orcOrc1;balAcu1	1
AGBL4	0.436039	0.794951		12	23	1	myoDav1	0	NA	1
AGER	0.374374	0.794951		14	34	0	NA	0	NA	0
AGFG2	0.504982	0.794951		13	32	1	micOch1	0	NA	1
AGK	0.198897	0.794951		13	29	0	NA	0	NA	0
AGL	0.507964	0.794951		11	30	0	NA	0	NA	0
AGMO	0.160553	0.794951		11	29	1	hetGla2	2	cavPor3;octDeg1	1
AGO2	0.521297	0.794951		11	27	0	NA	0	NA	0
AGO4	0.606046	0.794951		12	30	0	NA	1	panHod1	0
AGPAT1	0.524916	0.794951		13	34	0	NA	0	NA	0
AGPAT4	0.465063	0.794951		10	27	1	myoDav1	0	NA	1
AGPS	0.504023	0.794951		12	25	0	NA	0	NA	0
AGR3	0.108092	0.794951		12	31	2	nanGal1;hetGla2	4	vicPac2;felCat8;odoRosDiv1;lepWed1	2
AGRN	0.476898	0.794951		11	22	1	myoDav1	0	NA	1
AGRP	0.507985	0.794951		14	34	0	NA	1	turTru2	0
AGTRAP	0.0577271	0.794951		13	33	0	NA	0	NA	0
AGXT	0.585378	0.794951		12	27	0	NA	1	capHir1	0
AHDC1	0.576362	0.794951		11	21	0	NA	1	vicPac2	0
AHI1	0.45962	0.794951		12	24	0	NA	0	NA	0
AHR	0.491706	0.794951		12	29	0	NA	0	NA	0
AHSA1	0.432978	0.794951		13	33	0	NA	0	NA	0
AHSA2	0.075315	0.794951		13	34	2	triMan1;chrAsi1	2	canFam3;musFur1	2
AHSP	0.161926	0.794951		13	33	0	NA	0	NA	0
AIDA	0.50335	0.794951		12	31	0	NA	0	NA	0
AIFM1	0.546388	0.794951		13	26	0	NA	1	saiBol1	0
AIM1	0.55923	0.794951		13	30	0	NA	0	NA	0
AIM1L	0.58714	0.794951		11	28	2	pteAle1;pteVam1	8	tarSyr2;balAcu1;panHod1;bosTau8;bisBis1;felCat8;odoRosDiv1;lepWed1	1
AIM2	0.140005	0.794951		8	25	3	hetGla2;conCri1;triMan1	9	tarSyr2;cavPor3;oryCun2;ochPri3;felCat8;canFam3;musFur1;odoRosDiv1;lepWed1	3
AIPL1	0.584496	0.794951		9	29	0	NA	0	NA	0
AIRE	0.571542	0.794951		9	20	0	NA	0	NA	0
AJAP1	0.531687	0.794951		7	24	0	NA	0	NA	0
AK4	0.500206	0.794951		12	32	0	NA	1	rheMac3	0
AK6	0.506573	0.794951		12	33	0	NA	0	NA	0
AK7	0.351799	0.794951		12	26	0	NA	0	NA	0
AKAP10	0.406074	0.794951		11	31	0	NA	0	NA	0
AKAP12	0.436673	0.794951		14	33	1	myoDav1	0	NA	1
AKAP3	0.549176	0.794951		13	32	0	NA	1	oryCun2	0
AKAP4	0.598548	0.794951		12	24	0	NA	1	calJac3	0
AKAP5	0.384227	0.794951		13	33	0	NA	0	NA	0
AKAP6	0.403565	0.794951		12	28	0	NA	0	NA	0
AKAP8	0.377695	0.794951		14	32	0	NA	0	NA	0
AKAP8L	0.419208	0.794951		14	32	0	NA	0	NA	0
AKAP9	0.170442	0.794951		9	26	1	myoDav1	0	NA	1
AKIP1	0.428474	0.794951		13	32	0	NA	0	NA	0
AKIRIN1	0.557545	0.794951		12	23	0	NA	0	NA	0
AKIRIN2	0.550872	0.794951		11	22	0	NA	0	NA	0
AKNA	0.296775	0.794951		12	27	0	NA	2	panTro4;speTri2	0
AKNAD1	0.311161	0.794951		14	34	3	nanGal1;pteAle1;pteVam1	0	NA	2
AKR1C3	0.542349	0.794951		9	27	2	triMan1;chrAsi1	3	vicPac2;canFam3;loxAfr3	2
AKR1C4	0.464428	0.794951		7	18	1	nanGal1	3	papAnu2;chlSab2;camFer1	1
AKR1D1	0.466567	0.794951		12	29	0	NA	0	NA	0
AKR7A2	0.458913	0.794951		10	21	0	NA	0	NA	0
AKT1S1	0.378163	0.794951		12	24	0	NA	0	NA	0
AKT2	0.459547	0.794951		13	30	0	NA	1	bisBis1	0
AKT3	0.500313	0.794951		10	30	0	NA	0	NA	0
AL049794.1	0.0620935	0.794951		12	31	12	micOch1;perManBai1;mm10;rn6;nanGal1;hetGla2;pteAle1;pteVam1;eptFus1;myoDav1;myoLuc2;conCri1	19	calJac3;speTri2;cavPor3;octDeg1;oryCun2;turTru2;orcOrc1;balAcu1;panHod1;bosTau8;bisBis1;capHir1;equCab2;cerSim1;felCat8;canFam3;musFur1;odoRosDiv1;lepWed1	4
AL109659.1	0.416055	0.794951		11	32	8	micOch1;perManBai1;mm10;rn6;hetGla2;pteAle1;pteVam1;conCri1	18	calJac3;saiBol1;speTri2;octDeg1;ochPri3;orcOrc1;balAcu1;panHod1;bosTau8;bisBis1;capHir1;equCab2;cerSim1;felCat8;canFam3;musFur1;odoRosDiv1;lepWed1	4
AL109927.1	0.589856	0.794951		14	34	7	rn6;nanGal1;pteAle1;pteVam1;eptFus1;myoLuc2;conCri1	27	rheMac3;macFas5;papAnu2;chlSab2;rhiRox1;calJac3;saiBol1;tarSyr2;otoGar3;speTri2;cavPor3;vicPac2;camFer1;turTru2;orcOrc1;balAcu1;panHod1;bosTau8;bisBis1;capHir1;equCab2;cerSim1;felCat8;canFam3;musFur1;odoRosDiv1;lepWed1	3
AL356289.1	0.339901	0.794951		9	28	9	micOch1;perManBai1;mm10;rn6;nanGal1;hetGla2;eptFus1;myoLuc2;conCri1	22	panPan1;ponAbe2;macFas5;papAnu2;rhiRox1;tarSyr2;cavPor3;octDeg1;vicPac2;camFer1;orcOrc1;balAcu1;panHod1;bisBis1;capHir1;equCab2;cerSim1;felCat8;canFam3;musFur1;odoRosDiv1;lepWed1	4
AL357140.1	0.321464	0.794951		14	31	11	perManBai1;mm10;nanGal1;hetGla2;pteAle1;pteVam1;myoDav1;myoLuc2;conCri1;triMan1;chrAsi1	24	rheMac3;macFas5;papAnu2;saiBol1;tarSyr2;otoGar3;speTri2;cavPor3;octDeg1;vicPac2;camFer1;turTru2;orcOrc1;balAcu1;panHod1;bosTau8;bisBis1;capHir1;felCat8;canFam3;musFur1;odoRosDiv1;lepWed1;loxAfr3	6
AL358852.1	0.279626	0.794951		10	25	6	micOch1;mm10;rn6;hetGla2;eptFus1;triMan1	7	panTro4;panPan1;calJac3;saiBol1;octDeg1;canFam3;lepWed1	4
ALAD	0.572171	0.794951		14	34	0	NA	1	vicPac2	0
ALAS1	0.440241	0.794951		11	31	0	NA	0	NA	0
ALAS2	0.391154	0.794951		14	30	1	rn6	0	NA	1
ALDH16A1	0.498923	0.794951		12	30	0	NA	0	NA	0
ALDH1A1	0.437625	0.794951		13	29	0	NA	0	NA	0
ALDH1A3	0.3537	0.794951		11	27	0	NA	0	NA	0
ALDH1B1	0.506188	0.794951		13	31	3	hetGla2;pteAle1;triMan1	8	cavPor3;oryCun2;camFer1;panHod1;capHir1;equCab2;lepWed1;loxAfr3	3
ALDH1L1	0.177652	0.794951		10	23	1	rn6	0	NA	1
ALDH2	0.555061	0.794951		14	30	0	NA	0	NA	0
ALDH3A2	0.0917271	0.794951		13	32	0	NA	0	NA	0
ALDH3B1	0.240155	0.794951		10	24	0	NA	0	NA	0
ALDH4A1	0.52069	0.794951		11	30	0	NA	0	NA	0
ALDH6A1	0.414302	0.794951		14	32	1	myoLuc2	1	rhiRox1	1
ALDH7A1	0.237661	0.794951		14	28	2	pteAle1;conCri1	0	NA	2
ALDH9A1	0.53337	0.794951		13	31	0	NA	0	NA	0
ALDOA	0.502205	0.794951		13	30	0	NA	0	NA	0
ALDOB	0.392302	0.794951		13	34	0	NA	0	NA	0
ALG11	0.432073	0.794951		14	34	0	NA	0	NA	0
ALG13	0.266449	0.794951		12	28	1	pteAle1	0	NA	1
ALG2	0.517514	0.794951		14	32	0	NA	0	NA	0
ALG8	0.506662	0.794951		12	32	0	NA	0	NA	0
ALKBH1	0.61787	0.794951		14	29	0	NA	0	NA	0
ALKBH2	0.50792	0.794951		14	33	0	NA	0	NA	0
ALKBH4	0.507755	0.794951		12	31	0	NA	0	NA	0
ALKBH5	0.567384	0.794951		11	22	0	NA	0	NA	0
ALKBH7	0.535013	0.794951		10	28	0	NA	0	NA	0
ALKBH8	0.500676	0.794951		11	28	0	NA	0	NA	0
ALLC	0.133486	0.794951		11	31	1	hetGla2	4	calJac3;turTru2;orcOrc1;balAcu1	1
ALMS1	0.239756	0.794951		9	23	7	micOch1;perManBai1;mm10;rn6;hetGla2;pteAle1;myoDav1	12	chlSab2;otoGar3;cavPor3;octDeg1;ochPri3;camFer1;orcOrc1;panHod1;bosTau8;bisBis1;capHir1;equCab2	3
ALOX12	0.525591	0.794951		12	32	0	NA	0	NA	0
ALOX15B	0.071318	0.794951		8	27	1	hetGla2	3	calJac3;vicPac2;balAcu1	1
ALOX5	0.503724	0.794951		12	26	0	NA	0	NA	0
ALOX5AP	0.569583	0.794951		12	32	0	NA	0	NA	0
ALPI	0.546422	0.794951		10	30	0	NA	1	vicPac2	0
ALPK2	0.186665	0.794951		10	28	1	micOch1	0	NA	1
ALPP	0.592313	0.794951		9	23	2	micOch1;mm10	4	macFas5;panHod1;bisBis1;equCab2	1
ALPPL2	0.551528	0.794951		7	20	2	micOch1;mm10	4	rheMac3;cavPor3;bosTau8;equCab2	1
ALS2	0.399192	0.794951		11	29	1	pteAle1	0	NA	1
ALS2CL	0.552794	0.794951		11	28	0	NA	0	NA	0
ALS2CR11	0.421315	0.794951		11	26	0	NA	0	NA	0
ALS2CR12	0.175762	0.794951		13	32	0	NA	0	NA	0
ALX4	0.445343	0.794951		13	21	0	NA	0	NA	0
AMBP	0.569084	0.794951		13	30	0	NA	0	NA	0
AMBRA1	0.475796	0.794951		13	27	1	myoDav1	0	NA	1
AMD1	0.160313	0.794951		14	30	0	NA	0	NA	0
AMDHD2	0.519446	0.794951		14	30	0	NA	0	NA	0
AMELX	0.429973	0.794951		13	28	0	NA	0	NA	0
AMELY	0.41296	0.794951		14	28	0	NA	0	NA	0
AMER1	0.475959	0.794951		14	32	0	NA	0	NA	0
AMER3	0.0425145	0.794951		11	28	0	NA	0	NA	0
AMFR	0.522674	0.794951		12	31	0	NA	0	NA	0
AMHR2	0.502954	0.794951		14	30	0	NA	0	NA	0
AMICA1	0.176659	0.794951		13	31	0	NA	0	NA	0
AMIGO1	0.432208	0.794951		13	34	0	NA	0	NA	0
AMIGO2	0.551321	0.794951		13	33	0	NA	0	NA	0
AMMECR1	0.417304	0.794951		12	18	0	NA	0	NA	0
AMOT	0.394219	0.794951		13	30	1	rn6	0	NA	1
AMOTL1	0.560827	0.794951		11	30	0	NA	1	camFer1	0
AMPD1	0.150876	0.794951		13	30	0	NA	0	NA	0
AMPD2	0.51155	0.794951		12	32	0	NA	0	NA	0
AMPH	0.554106	0.794951		11	29	0	NA	0	NA	0
AMTN	0.591347	0.794951		13	33	0	NA	0	NA	0
AMY2B	0.37115	0.794951		9	27	0	NA	1	canFam3	0
AMZ1	0.0581064	0.794951		11	25	1	eptFus1	0	NA	1
ANAPC1	0.536477	0.794951		9	24	0	NA	1	panPan1	0
ANAPC16	0.127503	0.794951		14	34	0	NA	0	NA	0
ANAPC2	0.540869	0.794951		12	23	0	NA	0	NA	0
ANAPC4	0.593018	0.794951		11	29	0	NA	0	NA	0
ANAPC5	0.539496	0.794951		12	30	0	NA	0	NA	0
ANAPC7	0.541827	0.794951		13	30	0	NA	0	NA	0
ANGEL2	0.439236	0.794951		13	34	0	NA	0	NA	0
ANGPT1	0.458381	0.794951		13	30	0	NA	0	NA	0
ANGPT2	0.538371	0.794951		12	34	0	NA	0	NA	0
ANGPT4	0.514113	0.794951		12	29	0	NA	1	saiBol1	0
ANGPTL2	0.402182	0.794951		11	29	1	myoDav1	0	NA	1
ANGPTL4	0.559664	0.794951		11	26	0	NA	0	NA	0
ANGPTL5	0.0475576	0.794951		13	31	4	micOch1;mm10;rn6;conCri1	0	NA	2
ANGPTL6	0.0702842	0.794951		10	24	0	NA	0	NA	0
ANK1	0.485145	0.794951		11	29	0	NA	1	capHir1	0
ANK2	0.522814	0.794951		8	29	0	NA	6	rheMac3;macFas5;papAnu2;chlSab2;rhiRox1;calJac3	0
ANKAR	0.263722	0.794951		12	26	1	nanGal1	1	panPan1	1
ANKDD1A	0.261803	0.794951		12	25	0	NA	2	orcOrc1;balAcu1	0
ANKDD1B	0.280411	0.794951		14	33	6	perManBai1;eptFus1;myoDav1;myoLuc2;conCri1;chrAsi1	8	tarSyr2;vicPac2;orcOrc1;balAcu1;panHod1;bosTau8;bisBis1;canFam3	4
ANKFN1	0.442704	0.794951		12	30	1	rn6	0	NA	1
ANKFY1	0.527176	0.794951		13	30	0	NA	1	papAnu2	0
ANKIB1	0.510227	0.794951		12	31	0	NA	0	NA	0
ANKLE2	0.505172	0.794951		12	28	0	NA	1	turTru2	0
ANKMY2	0.52136	0.794951		14	34	0	NA	1	papAnu2	0
ANKRD1	0.500295	0.794951		13	32	0	NA	0	NA	0
ANKRD13A	0.499546	0.794951		12	30	0	NA	1	panPan1	0
ANKRD13B	0.510352	0.794951		13	29	0	NA	0	NA	0
ANKRD13D	0.440483	0.794951		12	30	0	NA	1	ochPri3	0
ANKRD2	0.476723	0.794951		13	33	0	NA	1	turTru2	0
ANKRD23	0.0683669	0.794951		14	33	3	pteAle1;pteVam1;triMan1	5	turTru2;orcOrc1;balAcu1;odoRosDiv1;lepWed1	2
ANKRD27	0.32504	0.794951		11	29	1	pteAle1	1	ponAbe2	1
ANKRD28	0.507845	0.794951		14	30	0	NA	0	NA	0
ANKRD31	0.130395	0.794951		11	26	2	rn6;chrAsi1	1	vicPac2	2
ANKRD32	0.589153	0.794951		14	30	0	NA	0	NA	0
ANKRD34A	0.582761	0.794951		13	30	0	NA	0	NA	0
ANKRD39	0.561053	0.794951		14	32	0	NA	0	NA	0
ANKRD40	0.507789	0.794951		13	33	0	NA	0	NA	0
ANKRD45	0.45628	0.794951		11	30	0	NA	0	NA	0
ANKRD52	0.506769	0.794951		12	33	0	NA	0	NA	0
ANKRD55	0.435833	0.794951		11	28	0	NA	1	macFas5	0
ANKRD6	0.0660074	0.794951		11	32	0	NA	0	NA	0
ANKRD61	0.579944	0.794951		14	34	0	NA	1	turTru2	0
ANKS1B	0.305244	0.794951		8	27	1	rn6	1	panPan1	1
ANKS3	0.535093	0.794951		13	29	0	NA	1	capHir1	0
ANKS6	0.534779	0.794951		12	31	0	NA	1	ponAbe2	0
ANKUB1	0.541137	0.794951		12	34	1	perManBai1	1	canFam3	1
ANLN	0.480797	0.794951		12	33	0	NA	0	NA	0
ANO1	0.426676	0.794951		10	27	0	NA	0	NA	0
ANO10	0.456577	0.794951		12	32	0	NA	0	NA	0
ANO4	0.500887	0.794951		13	32	0	NA	1	panPan1	0
ANO5	0.310902	0.794951		12	27	0	NA	0	NA	0
ANO8	0.574004	0.794951		10	19	0	NA	2	turTru2;capHir1	0
ANO9	0.384873	0.794951		11	18	0	NA	2	turTru2;orcOrc1	0
ANP32A	0.584122	0.794951		13	31	0	NA	0	NA	0
ANP32B	0.372933	0.794951		12	31	0	NA	0	NA	0
ANP32E	0.32472	0.794951		13	32	0	NA	0	NA	0
ANPEP	0.343249	0.794951		13	28	1	myoDav1	1	bisBis1	1
ANTXR1	0.50735	0.794951		11	29	0	NA	0	NA	0
ANTXRL	0.384098	0.794951		9	21	1	nanGal1	3	ponAbe2;canFam3;musFur1	1
ANXA1	0.403374	0.794951		12	29	0	NA	0	NA	0
ANXA11	0.523592	0.794951		13	27	0	NA	1	calJac3	0
ANXA13	0.439786	0.794951		13	32	1	mm10	0	NA	1
ANXA2	0.572083	0.794951		14	32	0	NA	1	vicPac2	0
ANXA6	0.501886	0.794951		11	30	0	NA	1	chlSab2	0
ANXA8L1	0.207508	0.794951		9	32	0	NA	1	rhiRox1	0
ANXA9	0.151329	0.794951		13	31	1	triMan1	3	turTru2;orcOrc1;balAcu1	1
AOAH	0.441643	0.794951		12	31	0	NA	0	NA	0
AOC1	0.194828	0.794951		11	27	0	NA	0	NA	0
AOC2	0.0734189	0.794951		12	30	3	rn6;hetGla2;triMan1	3	tarSyr2;cavPor3;octDeg1	3
AOC3	0.509616	0.794951		12	29	0	NA	1	rheMac3	0
AOX1	0.278452	0.794951		9	25	1	pteAle1	2	felCat8;canFam3	1
AP1AR	0.507736	0.794951		12	34	0	NA	0	NA	0
AP1B1	0.510292	0.794951		13	29	0	NA	0	NA	0
AP1G1	0.442654	0.794951		13	29	1	rn6	0	NA	1
AP1M1	0.561821	0.794951		14	32	0	NA	0	NA	0
AP1M2	0.467298	0.794951		13	27	1	myoLuc2	0	NA	1
AP2A1	0.518051	0.794951		11	26	0	NA	1	capHir1	0
AP2A2	0.518573	0.794951		10	26	0	NA	0	NA	0
AP2B1	0.509956	0.794951		11	25	0	NA	0	NA	0
AP2M1	0.5079	0.794951		14	33	0	NA	0	NA	0
AP3B1	0.506809	0.794951		12	27	0	NA	0	NA	0
AP3D1	0.508999	0.794951		11	27	0	NA	1	turTru2	0
AP3M2	0.367302	0.794951		14	32	1	pteAle1	0	NA	1
AP4B1	0.452013	0.794951		14	33	0	NA	0	NA	0
AP5B1	0.527199	0.794951		12	29	0	NA	0	NA	0
AP5M1	0.47257	0.794951		13	32	0	NA	0	NA	0
APAF1	0.483406	0.794951		12	26	0	NA	0	NA	0
APBA1	0.603577	0.794951		9	20	0	NA	0	NA	0
APBA2	0.496673	0.794951		12	27	0	NA	1	rheMac3	0
APBA3	0.333045	0.794951		13	23	0	NA	0	NA	0
APBB1	0.607911	0.794951		12	31	0	NA	0	NA	0
APC	0.507699	0.794951		13	32	0	NA	0	NA	0
APCDD1	0.520339	0.794951		13	31	0	NA	1	papAnu2	0
APCDD1L	0.547541	0.794951		11	27	1	mm10	4	oryCun2;ochPri3;turTru2;balAcu1	1
APCS	0.177364	0.794951		10	32	2	nanGal1;pteAle1	3	vicPac2;camFer1;canFam3	2
APEH	0.303269	0.794951		12	33	0	NA	0	NA	0
APH1A	0.507985	0.794951		14	34	0	NA	0	NA	0
APH1B	0.525628	0.794951		12	33	0	NA	0	NA	0
APIP	0.500849	0.794951		13	33	0	NA	1	papAnu2	0
APITD1	0.142477	0.794951		14	33	0	NA	0	NA	0
APLP1	0.303108	0.794951		14	30	0	NA	0	NA	0
APOA1	0.446075	0.794951		13	30	0	NA	0	NA	0
APOA2	0.187659	0.794951		14	34	1	eptFus1	0	NA	1
APOA4	0.458665	0.794951		13	32	0	NA	0	NA	0
APOB	0.137557	0.794951		14	30	0	NA	0	NA	0
APOBEC1	0.430145	0.794951		10	30	0	NA	0	NA	0
APOBEC3C	0.529578	0.794951		7	22	0	NA	2	rheMac3;lepWed1	0
APOBEC3H	0.0490948	0.794951		11	32	1	eptFus1	0	NA	1
APOBR	0.170206	0.794951		13	22	2	hetGla2;myoLuc2	0	NA	2
APOC4	0.509744	0.794951		13	30	2	pteAle1;pteVam1	0	NA	1
APOC4_APOC2	0.507763	0.794951		13	31	0	NA	0	NA	0
APOE	0.563176	0.794951		13	22	0	NA	0	NA	0
APOF	0.327857	0.794951		14	34	0	NA	0	NA	0
APOL2	0.331803	0.794951		9	21	2	hetGla2;chrAsi1	2	papAnu2;calJac3	2
APOL5	0.444315	0.794951		12	29	9	perManBai1;mm10;rn6;nanGal1;hetGla2;pteAle1;pteVam1;triMan1;chrAsi1	19	ponAbe2;chlSab2;saiBol1;tarSyr2;otoGar3;speTri2;cavPor3;ochPri3;vicPac2;camFer1;turTru2;orcOrc1;bosTau8;capHir1;equCab2;felCat8;odoRosDiv1;lepWed1;loxAfr3	5
APOM	0.57039	0.794951		13	33	0	NA	0	NA	0
APOO	0.599936	0.794951		13	28	0	NA	0	NA	0
APOOL	0.503808	0.794951		13	24	0	NA	0	NA	0
APOPT1	0.460579	0.794951		8	20	0	NA	0	NA	0
APPBP2	0.396599	0.794951		13	25	0	NA	0	NA	0
APPL1	0.295938	0.794951		11	30	1	nanGal1	0	NA	1
APPL2	0.549588	0.794951		12	30	0	NA	1	panHod1	0
AQP1	0.542453	0.794951		12	33	0	NA	0	NA	0
AQP10	0.210493	0.794951		10	33	4	micOch1;perManBai1;mm10;triMan1	9	vicPac2;camFer1;turTru2;orcOrc1;balAcu1;bosTau8;bisBis1;cerSim1;lepWed1	2
AQP2	0.410868	0.794951		14	32	0	NA	0	NA	0
AQP4	0.569599	0.794951		12	33	0	NA	0	NA	0
AQP5	0.0651215	0.794951		10	25	0	NA	0	NA	0
AQP7	0.521351	0.794951		13	33	0	NA	1	panPan1	0
AQP8	0.0719211	0.794951		11	33	0	NA	0	NA	0
AQP9	0.385607	0.794951		13	33	0	NA	0	NA	0
AQPEP	0.50685	0.794951		12	31	0	NA	0	NA	0
AQR	0.0654685	0.794951		12	30	1	triMan1	0	NA	1
AR	0.367162	0.794951		10	21	1	conCri1	1	rheMac3	1
ARAP1	0.517684	0.794951		11	33	0	NA	0	NA	0
ARAP2	0.358891	0.794951		12	28	0	NA	0	NA	0
ARAP3	0.520041	0.794951		13	28	0	NA	0	NA	0
ARF4	0.419668	0.794951		12	33	0	NA	0	NA	0
ARF5	0.507899	0.794951		14	33	0	NA	0	NA	0
ARFGAP1	0.0559332	0.794951		11	32	0	NA	0	NA	0
ARFGAP3	0.450163	0.794951		11	26	1	rn6	0	NA	1
ARFGEF1	0.604264	0.794951		11	30	0	NA	1	ochPri3	0
ARGLU1	0.06013	0.794951		14	33	0	NA	0	NA	0
ARHGAP1	0.121354	0.794951		14	31	0	NA	0	NA	0
ARHGAP12	0.510917	0.794951		10	29	0	NA	1	panTro4	0
ARHGAP15	0.509705	0.794951		11	29	0	NA	0	NA	0
ARHGAP17	0.409814	0.794951		10	29	0	NA	0	NA	0
ARHGAP18	0.501796	0.794951		12	29	0	NA	1	panPan1	0
ARHGAP19_SLIT1	0.549671	0.794951		11	30	0	NA	0	NA	0
ARHGAP20	0.128318	0.794951		11	26	1	pteAle1	0	NA	1
ARHGAP21	0.447073	0.794951		11	30	0	NA	1	panPan1	0
ARHGAP22	0.385006	0.794951		13	24	1	chrAsi1	1	rheMac3	1
ARHGAP24	0.500221	0.794951		14	33	0	NA	0	NA	0
ARHGAP25	0.514671	0.794951		13	30	0	NA	0	NA	0
ARHGAP26	0.327188	0.794951		9	27	0	NA	0	NA	0
ARHGAP28	0.424046	0.794951		11	33	0	NA	0	NA	0
ARHGAP29	0.493466	0.794951		13	31	0	NA	0	NA	0
ARHGAP30	0.433579	0.794951		14	32	0	NA	0	NA	0
ARHGAP31	0.503254	0.794951		12	29	0	NA	0	NA	0
ARHGAP32	0.52704	0.794951		14	28	0	NA	6	panTro4;panPan1;ponAbe2;papAnu2;chlSab2;saiBol1	0
ARHGAP35	0.411104	0.794951		14	31	0	NA	0	NA	0
ARHGAP39	0.536273	0.794951		10	29	0	NA	0	NA	0
ARHGAP5	0.192052	0.794951		11	29	0	NA	0	NA	0
ARHGAP8	0.574096	0.794951		9	27	0	NA	4	turTru2;orcOrc1;balAcu1;odoRosDiv1	0
ARHGAP9	0.0938228	0.794951		13	30	0	NA	0	NA	0
ARHGDIA	0.395976	0.794951		14	31	0	NA	0	NA	0
ARHGDIG	0.383656	0.794951		12	28	0	NA	0	NA	0
ARHGEF1	0.49927	0.794951		12	24	0	NA	0	NA	0
ARHGEF10	0.308518	0.794951		8	24	0	NA	1	capHir1	0
ARHGEF10L	0.589914	0.794951		10	25	0	NA	0	NA	0
ARHGEF11	0.235161	0.794951		13	30	0	NA	0	NA	0
ARHGEF15	0.518853	0.794951		14	28	1	myoDav1	0	NA	1
ARHGEF16	0.502583	0.794951		9	25	0	NA	1	chlSab2	0
ARHGEF18	0.596048	0.794951		12	22	0	NA	0	NA	0
ARHGEF19	0.597204	0.794951		11	22	0	NA	1	camFer1	0
ARHGEF2	0.582789	0.794951		12	28	0	NA	0	NA	0
ARHGEF3	0.550751	0.794951		13	30	0	NA	0	NA	0
ARHGEF39	0.50074	0.794951		14	34	0	NA	0	NA	0
ARHGEF40	0.584719	0.794951		13	31	0	NA	2	camFer1;turTru2	0
ARHGEF5	0.55516	0.794951		13	30	1	rn6	0	NA	1
ARHGEF7	0.568656	0.794951		10	28	0	NA	0	NA	0
ARID2	0.504412	0.794951		14	32	0	NA	0	NA	0
ARID3C	0.569578	0.794951		12	29	0	NA	1	panHod1	0
ARID4A	0.319045	0.794951		12	32	0	NA	0	NA	0
ARID4B	0.499925	0.794951		11	32	0	NA	0	NA	0
ARID5A	0.591992	0.794951		14	30	0	NA	0	NA	0
ARID5B	0.441304	0.794951		13	31	0	NA	0	NA	0
ARIH2	0.500679	0.794951		12	30	0	NA	0	NA	0
ARL11	0.109616	0.794951		12	31	0	NA	0	NA	0
ARL13A	0.446691	0.794951		9	31	0	NA	3	cavPor3;octDeg1;canFam3	0
ARL14	0.0530133	0.794951		14	33	1	conCri1	0	NA	1
ARL14EP	0.570138	0.794951		13	33	0	NA	0	NA	0
ARL15	0.273006	0.794951		11	29	0	NA	0	NA	0
ARL2	0.503993	0.794951		14	29	0	NA	0	NA	0
ARL2_SNX15	0.495394	0.794951		14	32	0	NA	0	NA	0
ARL3	0.565542	0.794951		13	32	0	NA	0	NA	0
ARL4A	0.500838	0.794951		14	31	0	NA	1	papAnu2	0
ARL4C	0.386123	0.794951		13	27	2	rn6;myoLuc2	0	NA	2
ARL4D	0.553401	0.794951		12	31	0	NA	0	NA	0
ARL5B	0.402436	0.794951		14	26	0	NA	0	NA	0
ARL5C	0.4952	0.794951		13	34	1	conCri1	12	rheMac3;macFas5;papAnu2;chlSab2;rhiRox1;calJac3;tarSyr2;oryCun2;ochPri3;orcOrc1;balAcu1;bosTau8	1
ARL6IP4	0.313501	0.794951		14	30	4	perManBai1;mm10;nanGal1;pteAle1	9	rhiRox1;calJac3;otoGar3;speTri2;oryCun2;ochPri3;camFer1;balAcu1;odoRosDiv1	2
ARL8B	0.532694	0.794951		8	25	0	NA	0	NA	0
ARMC10	0.535323	0.794951		13	33	0	NA	0	NA	0
ARMC5	0.216915	0.794951		12	24	0	NA	0	NA	0
ARMC6	0.549539	0.794951		12	32	0	NA	0	NA	0
ARMC8	0.500358	0.794951		13	31	0	NA	0	NA	0
ARMC9	0.460354	0.794951		10	31	0	NA	0	NA	0
ARMCX2	0.296721	0.794951		12	31	0	NA	0	NA	0
ARMCX5	0.144792	0.794951		12	29	2	hetGla2;triMan1	3	papAnu2;cavPor3;octDeg1	2
ARNT	0.418742	0.794951		13	30	0	NA	0	NA	0
ARPC1A	0.507493	0.794951		13	29	0	NA	1	turTru2	0
ARPC3	0.501182	0.794951		14	30	0	NA	0	NA	0
ARPC4	0.436933	0.794951		13	29	0	NA	0	NA	0
ARPC4_TTLL3	0.373586	0.794951		14	29	0	NA	0	NA	0
ARPC5L	0.521824	0.794951		12	28	0	NA	0	NA	0
ARPIN	0.55009	0.794951		12	32	0	NA	0	NA	0
ARPP19	0.504216	0.794951		14	33	0	NA	0	NA	0
ARRB1	0.472119	0.794951		11	28	0	NA	0	NA	0
ARRDC5	0.478785	0.794951		13	29	0	NA	0	NA	0
ARSA	0.564053	0.794951		13	30	0	NA	0	NA	0
ARSG	0.5061	0.794951		12	31	0	NA	0	NA	0
ARSK	0.488745	0.794951		13	33	0	NA	1	panPan1	0
ART4	0.535983	0.794951		14	32	0	NA	0	NA	0
ART5	0.539903	0.794951		14	34	0	NA	0	NA	0
ARV1	0.0943666	0.794951		14	33	0	NA	0	NA	0
AS3MT	0.0774727	0.794951		14	30	5	hetGla2;pteAle1;myoDav1;myoLuc2;chrAsi1	4	calJac3;tarSyr2;cavPor3;orcOrc1	3
ASAH2B	0.505084	0.794951		12	30	0	NA	1	panTro4	0
ASAP2	0.537375	0.794951		11	28	0	NA	0	NA	0
ASAP3	0.577064	0.794951		14	27	0	NA	2	camFer1;orcOrc1	0
ASB1	0.386364	0.794951		12	30	0	NA	0	NA	0
ASB10	0.530371	0.794951		13	30	0	NA	0	NA	0
ASB14	0.572279	0.794951		13	33	0	NA	2	calJac3;ochPri3	0
ASB16	0.616368	0.794951		13	23	2	nanGal1;chrAsi1	2	cavPor3;octDeg1	2
ASB17	0.236371	0.794951		13	34	1	nanGal1	0	NA	1
ASCC2	0.44139	0.794951		14	30	0	NA	0	NA	0
ASCC3	0.580191	0.794951		11	24	0	NA	0	NA	0
ASCL1	0.392782	0.794951		12	20	0	NA	0	NA	0
ASCL3	0.507985	0.794951		14	34	0	NA	0	NA	0
ASCL5	0.57906	0.794951		10	20	0	NA	1	turTru2	0
ASF1A	0.564029	0.794951		14	33	0	NA	0	NA	0
ASGR2	0.395275	0.794951		11	31	0	NA	0	NA	0
ASH1L	0.557433	0.794951		12	30	0	NA	1	panPan1	0
ASH2L	0.551672	0.794951		12	31	0	NA	0	NA	0
ASIC3	0.414514	0.794951		14	27	0	NA	0	NA	0
ASIC4	0.537727	0.794951		12	28	0	NA	0	NA	0
ASNA1	0.573248	0.794951		12	32	0	NA	0	NA	0
ASNS	0.538581	0.794951		13	30	0	NA	0	NA	0
ASNSD1	0.359603	0.794951		12	34	1	mm10	0	NA	1
ASPA	0.453137	0.794951		14	27	1	myoDav1	0	NA	1
ASPDH	0.377291	0.794951		13	29	1	pteAle1	0	NA	1
ASPG	0.0835108	0.794951		9	28	1	pteAle1	1	calJac3	1
ASPH	0.426484	0.794951		9	30	0	NA	1	cavPor3	0
ASPM	0.546404	0.794951		11	29	2	eptFus1;myoLuc2	2	vicPac2;felCat8	1
ASPN	0.501491	0.794951		14	29	0	NA	0	NA	0
ASPRV1	0.250897	0.794951		13	34	0	NA	0	NA	0
ASRGL1	0.358344	0.794951		10	29	0	NA	0	NA	0
ASS1	0.501625	0.794951		12	28	0	NA	1	rheMac3	0
ASTE1	0.576305	0.794951		14	31	0	NA	0	NA	0
ASTL	0.332731	0.794951		12	31	1	conCri1	1	oryCun2	1
ASUN	0.481392	0.794951		13	27	1	myoDav1	1	rheMac3	1
ASXL2	0.536902	0.794951		12	29	0	NA	1	capHir1	0
ASXL3	0.186863	0.794951		8	23	0	NA	0	NA	0
ATAD1	0.500941	0.794951		13	32	0	NA	0	NA	0
ATAD3A	0.407494	0.794951		10	23	0	NA	0	NA	0
ATAD5	0.201434	0.794951		10	26	2	nanGal1;hetGla2	2	cavPor3;canFam3	2
ATCAY	0.507598	0.794951		13	29	0	NA	0	NA	0
ATE1	0.53029	0.794951		13	30	0	NA	0	NA	0
ATF3	0.134829	0.794951		13	32	0	NA	0	NA	0
ATF4	0.499543	0.794951		14	31	0	NA	0	NA	0
ATF5	0.541925	0.794951		9	25	0	NA	0	NA	0
ATF6	0.384803	0.794951		12	28	0	NA	0	NA	0
ATF6B	0.451011	0.794951		13	30	0	NA	0	NA	0
ATF7IP	0.523488	0.794951		13	27	0	NA	0	NA	0
ATF7IP2	0.0486766	0.794951		13	30	0	NA	0	NA	0
ATG13	0.540159	0.794951		12	33	0	NA	0	NA	0
ATG16L2	0.509303	0.794951		13	27	0	NA	0	NA	0
ATG2B	0.550216	0.794951		13	27	0	NA	1	panPan1	0
ATG3	0.572585	0.794951		14	33	0	NA	0	NA	0
ATG4B	0.501603	0.794951		12	31	0	NA	0	NA	0
ATG4C	0.499314	0.794951		13	31	0	NA	1	rheMac3	0
ATG4D	0.457523	0.794951		13	27	0	NA	0	NA	0
ATG5	0.445058	0.794951		14	29	0	NA	0	NA	0
ATG9A	0.285986	0.794951		14	33	1	eptFus1	0	NA	1
ATIC	0.523655	0.794951		13	30	0	NA	0	NA	0
ATL1	0.500703	0.794951		14	32	0	NA	0	NA	0
ATM	0.279352	0.794951		9	25	1	myoDav1	0	NA	1
ATN1	0.482143	0.794951		12	26	0	NA	2	panPan1;turTru2	0
ATOH7	0.500707	0.794951		10	25	0	NA	0	NA	0
ATOH8	0.506643	0.794951		11	20	0	NA	0	NA	0
ATP10D	0.490184	0.794951		10	27	1	mm10	0	NA	1
ATP11A	0.587649	0.794951		12	28	0	NA	1	balAcu1	0
ATP11AUN	0.528983	0.794951		11	31	9	micOch1;perManBai1;mm10;rn6;hetGla2;pteAle1;pteVam1;myoDav1;myoLuc2	16	papAnu2;calJac3;otoGar3;speTri2;cavPor3;vicPac2;camFer1;turTru2;orcOrc1;balAcu1;panHod1;capHir1;equCab2;cerSim1;felCat8;odoRosDiv1	3
ATP11B	0.423562	0.794951		13	25	0	NA	0	NA	0
ATP12A	0.522429	0.794951		12	30	0	NA	1	turTru2	0
ATP13A3	0.56655	0.794951		13	28	0	NA	0	NA	0
ATP13A4	0.13544	0.794951		11	29	0	NA	0	NA	0
ATP13A5	0.604751	0.794951		12	26	0	NA	3	turTru2;orcOrc1;balAcu1	0
ATP1A2	0.473019	0.794951		14	31	0	NA	0	NA	0
ATP1B2	0.574712	0.794951		14	33	0	NA	0	NA	0
ATP2A1	0.452986	0.794951		13	28	1	rn6	0	NA	1
ATP2A2	0.507545	0.794951		12	30	0	NA	0	NA	0
ATP2A3	0.500869	0.794951		11	28	0	NA	0	NA	0
ATP2B3	0.527385	0.794951		11	27	0	NA	1	panHod1	0
ATP2C1	0.566223	0.794951		10	31	0	NA	0	NA	0
ATP2C2	0.500847	0.794951		11	30	0	NA	0	NA	0
ATP4A	0.547771	0.794951		12	25	0	NA	1	ponAbe2	0
ATP4B	0.543283	0.794951		11	33	0	NA	0	NA	0
ATP5A1	0.602088	0.794951		14	32	0	NA	0	NA	0
ATP5B	0.436589	0.794951		14	27	0	NA	0	NA	0
ATP5D	0.526601	0.794951		12	24	0	NA	0	NA	0
ATP5EP2	0.47159	0.794951		8	29	8	micOch1;perManBai1;mm10;nanGal1;hetGla2;pteVam1;myoDav1;triMan1	26	rheMac3;macFas5;papAnu2;chlSab2;rhiRox1;calJac3;tarSyr2;otoGar3;speTri2;cavPor3;oryCun2;ochPri3;vicPac2;camFer1;turTru2;orcOrc1;panHod1;bosTau8;capHir1;equCab2;cerSim1;felCat8;canFam3;musFur1;lepWed1;loxAfr3	4
ATP5G2	0.572771	0.794951		14	32	0	NA	0	NA	0
ATP5H	0.501605	0.794951		11	34	0	NA	0	NA	0
ATP5I	0.559976	0.794951		10	26	0	NA	0	NA	0
ATP5J2_PTCD1	0.47497	0.794951		13	30	0	NA	2	turTru2;balAcu1	0
ATP5L2	0.45603	0.794951		11	25	11	micOch1;perManBai1;mm10;rn6;hetGla2;pteAle1;eptFus1;myoDav1;conCri1;triMan1;chrAsi1	21	macFas5;papAnu2;chlSab2;tarSyr2;otoGar3;cavPor3;octDeg1;ochPri3;camFer1;orcOrc1;balAcu1;panHod1;bosTau8;capHir1;equCab2;cerSim1;felCat8;canFam3;musFur1;odoRosDiv1;loxAfr3	6
ATP5S	0.183971	0.794951		14	34	0	NA	0	NA	0
ATP5SL	0.0615966	0.794951		13	30	0	NA	0	NA	0
ATP6AP1	0.567373	0.794951		14	28	0	NA	0	NA	0
ATP6AP1L	0.440367	0.794951		14	34	0	NA	1	balAcu1	0
ATP6V0A2	0.524238	0.794951		13	29	0	NA	1	panHod1	0
ATP6V0C	0.539247	0.794951		14	33	0	NA	1	capHir1	0
ATP6V0D2	0.616122	0.794951		14	31	0	NA	0	NA	0
ATP6V0E2	0.428931	0.794951		12	30	0	NA	0	NA	0
ATP6V1A	0.518787	0.794951		13	32	0	NA	1	turTru2	0
ATP6V1B2	0.534767	0.794951		13	32	0	NA	0	NA	0
ATP6V1C1	0.431917	0.794951		13	33	0	NA	0	NA	0
ATP6V1C2	0.489344	0.794951		13	30	0	NA	0	NA	0
ATP6V1D	0.508389	0.794951		14	33	0	NA	0	NA	0
ATP6V1E2	0.141275	0.794951		14	34	0	NA	0	NA	0
ATP6V1F	0.147674	0.794951		14	31	0	NA	0	NA	0
ATP6V1G3	0.080854	0.794951		12	34	1	triMan1	1	calJac3	1
ATP6V1H	0.528061	0.794951		13	33	0	NA	0	NA	0
ATP7B	0.585032	0.794951		13	29	0	NA	0	NA	0
ATP8A1	0.454496	0.794951		13	28	0	NA	0	NA	0
ATP8B2	0.084838	0.794951		14	28	0	NA	0	NA	0
ATP8B3	0.547726	0.794951		12	19	0	NA	4	rheMac3;calJac3;turTru2;orcOrc1	0
ATP8B4	0.570938	0.794951		9	28	0	NA	0	NA	0
ATP9A	0.456002	0.794951		11	24	0	NA	0	NA	0
ATP9B	0.492881	0.794951		11	26	1	myoDav1	0	NA	1
ATR	0.295726	0.794951		11	28	0	NA	0	NA	0
ATRAID	0.5079	0.794951		14	33	0	NA	0	NA	0
ATRIP	0.0587059	0.794951		14	31	0	NA	0	NA	0
ATRX	0.5952	0.794951		11	24	0	NA	2	rheMac3;balAcu1	0
ATXN10	0.597262	0.794951		11	28	0	NA	0	NA	0
ATXN1L	0.516395	0.794951		13	32	0	NA	1	rhiRox1	0
ATXN2	0.47198	0.794951		12	32	0	NA	1	papAnu2	0
ATXN2L	0.411012	0.794951		14	31	0	NA	0	NA	0
ATXN7L1	0.500301	0.794951		13	34	0	NA	0	NA	0
ATXN7L2	0.555107	0.794951		12	31	0	NA	2	panPan1;ponAbe2	0
ATXN7L3	0.331815	0.794951		12	32	1	pteAle1	1	turTru2	1
AUNIP	0.463515	0.794951		14	32	0	NA	0	NA	0
AUP1	0.466335	0.794951		14	34	0	NA	0	NA	0
AURKA	0.500268	0.794951		13	31	0	NA	0	NA	0
AURKAIP1	0.386965	0.794951		12	31	0	NA	0	NA	0
AURKB	0.436378	0.794951		14	30	1	myoDav1	0	NA	1
AVIL	0.508131	0.794951		11	33	0	NA	0	NA	0
AVPI1	0.543015	0.794951		14	31	0	NA	0	NA	0
AVPR1A	0.184043	0.794951		10	27	1	pteAle1	0	NA	1
AXDND1	0.509296	0.794951		9	25	0	NA	1	rheMac3	0
AXIN1	0.592737	0.794951		12	27	0	NA	2	camFer1;panHod1	0
AXIN2	0.418897	0.794951		10	25	0	NA	0	NA	0
AXL	0.425948	0.794951		11	29	0	NA	1	saiBol1	0
AZI2	0.432793	0.794951		13	33	0	NA	0	NA	0
AZIN2	0.557897	0.794951		12	30	1	rn6	1	ochPri3	1
B3GALNT1	0.501283	0.794951		14	32	0	NA	0	NA	0
B3GALT4	0.551103	0.794951		12	27	0	NA	2	turTru2;felCat8	0
B3GALT5	0.451783	0.794951		14	31	1	micOch1	0	NA	1
B3GALTL	0.501809	0.794951		11	31	0	NA	0	NA	0
B3GAT2	0.492508	0.794951		10	24	0	NA	0	NA	0
B3GAT3	0.544994	0.794951		14	31	0	NA	1	capHir1	0
B3GNT1	0.529727	0.794951		14	31	0	NA	2	turTru2;capHir1	0
B3GNT3	0.29236	0.794951		13	23	1	triMan1	4	vicPac2;turTru2;orcOrc1;balAcu1	1
B3GNT4	0.161881	0.794951		12	32	2	nanGal1;conCri1	3	cavPor3;octDeg1;odoRosDiv1	2
B3GNT5	0.507948	0.794951		14	33	0	NA	1	turTru2	0
B3GNT7	0.590811	0.794951		12	31	0	NA	1	balAcu1	0
B3GNT9	0.515812	0.794951		13	26	0	NA	1	turTru2	0
B4GALNT2	0.513553	0.794951		11	28	0	NA	1	turTru2	0
B4GALNT3	0.501889	0.794951		11	29	0	NA	0	NA	0
B4GALNT4	0.598466	0.794951		9	21	0	NA	1	rhiRox1	0
B4GALT5	0.514102	0.794951		13	32	0	NA	1	calJac3	0
B4GALT6	0.533571	0.794951		13	33	0	NA	0	NA	0
B4GALT7	0.571688	0.794951		13	32	0	NA	0	NA	0
B9D1	0.568289	0.794951		11	31	0	NA	0	NA	0
B9D2	0.507897	0.794951		14	33	0	NA	0	NA	0
BAALC	0.0491597	0.794951		7	18	0	NA	0	NA	0
BAAT	0.062822	0.794951		11	31	4	pteAle1;pteVam1;myoLuc2;conCri1	10	camFer1;orcOrc1;balAcu1;panHod1;bosTau8;bisBis1;capHir1;musFur1;odoRosDiv1;lepWed1	2
BACH2	0.50036	0.794951		13	26	0	NA	0	NA	0
BAG2	0.439312	0.794951		14	33	0	NA	0	NA	0
BAG3	0.514342	0.794951		14	30	0	NA	0	NA	0
BAG4	0.537752	0.794951		13	32	0	NA	1	capHir1	0
BAG5	0.389481	0.794951		12	31	0	NA	0	NA	0
BAHCC1	0.58456	0.794951		9	23	1	rn6	6	panPan1;vicPac2;camFer1;turTru2;capHir1;felCat8	1
BAI2	0.527249	0.794951		12	30	0	NA	1	capHir1	0
BAI3	0.178386	0.794951		11	27	1	nanGal1	0	NA	1
BAIAP2	0.596657	0.794951		9	29	0	NA	0	NA	0
BAIAP2L1	0.12286	0.794951		11	30	1	pteAle1	0	NA	1
BAK1	0.543943	0.794951		13	32	0	NA	1	ponAbe2	0
BAMBI	0.432543	0.794951		14	34	0	NA	0	NA	0
BANF2	0.574074	0.794951		12	33	0	NA	0	NA	0
BANK1	0.203306	0.794951		10	28	0	NA	0	NA	0
BANP	0.537367	0.794951		12	30	0	NA	0	NA	0
BAP1	0.507789	0.794951		13	33	0	NA	0	NA	0
BARHL1	0.441197	0.794951		11	24	0	NA	1	turTru2	0
BARHL2	0.586428	0.794951		12	26	0	NA	0	NA	0
BARX2	0.532688	0.794951		12	26	0	NA	0	NA	0
BASP1	0.499816	0.794951		8	21	1	rn6	1	bosTau8	1
BATF2	0.251645	0.794951		13	33	0	NA	0	NA	0
BAX	0.509367	0.794951		12	29	0	NA	0	NA	0
BAZ1A	0.50031	0.794951		12	31	0	NA	0	NA	0
BAZ1B	0.495576	0.794951		13	27	0	NA	0	NA	0
BAZ2A	0.392711	0.794951		14	32	1	mm10	1	turTru2	1
BAZ2B	0.518971	0.794951		12	33	0	NA	1	ponAbe2	0
BBIP1	0.114187	0.794951		14	33	0	NA	0	NA	0
BBS1	0.549056	0.794951		14	30	0	NA	0	NA	0
BBS10	0.508149	0.794951		14	33	0	NA	3	papAnu2;turTru2;bosTau8	0
BBS2	0.549364	0.794951		12	30	0	NA	0	NA	0
BBS5	0.522317	0.794951		13	32	0	NA	1	turTru2	0
BBS7	0.500728	0.794951		13	30	0	NA	0	NA	0
BBS9	0.118903	0.794951		10	26	1	hetGla2	0	NA	1
BCAN	0.138225	0.794951		12	27	0	NA	0	NA	0
BCAR1	0.580427	0.794951		13	29	0	NA	0	NA	0
BCAS1	0.441467	0.794951		11	29	0	NA	1	felCat8	0
BCAS2	0.402151	0.794951		14	32	1	eptFus1	0	NA	1
BCAS3	0.314226	0.794951		12	25	0	NA	0	NA	0
BCAT2	0.505814	0.794951		11	31	0	NA	1	panTro4	0
BCCIP	0.431766	0.794951		14	33	0	NA	0	NA	0
BCKDHA	0.552468	0.794951		14	33	0	NA	1	panHod1	0
BCL11A	0.435694	0.794951		13	30	0	NA	0	NA	0
BCL2	0.498638	0.794951		13	25	0	NA	0	NA	0
BCL2L11	0.39448	0.794951		14	32	0	NA	0	NA	0
BCL2L12	0.246142	0.794951		13	32	0	NA	0	NA	0
BCL2L13	0.411242	0.794951		11	26	0	NA	0	NA	0
BCL2L15	0.258689	0.794951		14	33	0	NA	0	NA	0
BCL2L2_PABPN1	0.473181	0.794951		14	32	0	NA	1	chlSab2	0
BCL3	0.509879	0.794951		11	26	0	NA	0	NA	0
BCL6	0.500724	0.794951		14	32	0	NA	0	NA	0
BCL7B	0.586827	0.794951		14	32	0	NA	1	balAcu1	0
BCL7C	0.41945	0.794951		14	29	1	pteVam1	0	NA	1
BCL9L	0.531802	0.794951		13	26	0	NA	1	panPan1	0
BCLAF1	0.500221	0.794951		13	34	0	NA	0	NA	0
BCO1	0.0935544	0.794951		12	31	0	NA	0	NA	0
BCO2	0.543165	0.794951		12	34	2	triMan1;chrAsi1	1	loxAfr3	2
BCOR	0.240509	0.794951		11	26	0	NA	0	NA	0
BCORL1	0.257967	0.794951		14	27	0	NA	1	panHod1	0
BCS1L	0.393255	0.794951		14	33	0	NA	0	NA	0
BDH1	0.300043	0.794951		12	27	0	NA	2	orcOrc1;balAcu1	0
BDH2	0.394688	0.794951		12	33	0	NA	0	NA	0
BDKRB2	0.473455	0.794951		14	32	0	NA	0	NA	0
BDP1	0.455215	0.794951		11	28	9	micOch1;perManBai1;rn6;nanGal1;hetGla2;pteAle1;myoDav1;myoLuc2;conCri1	13	tarSyr2;cavPor3;octDeg1;ochPri3;vicPac2;camFer1;orcOrc1;balAcu1;bosTau8;capHir1;equCab2;odoRosDiv1;lepWed1	4
BEAN1	0.583416	0.794951		11	26	0	NA	0	NA	0
BEGAIN	0.106243	0.794951		9	20	1	eptFus1	0	NA	1
BEND2	0.163234	0.794951		8	19	3	mm10;nanGal1;hetGla2	6	otoGar3;speTri2;cavPor3;octDeg1;vicPac2;bosTau8	2
BEND3	0.462058	0.794951		14	29	0	NA	2	panPan1;rheMac3	0
BEND4	0.507452	0.794951		13	32	0	NA	0	NA	0
BEND5	0.500304	0.794951		13	32	0	NA	0	NA	0
BEST2	0.548437	0.794951		11	28	0	NA	0	NA	0
BEST3	0.571383	0.794951		14	33	0	NA	0	NA	0
BEST4	0.473528	0.794951		13	34	1	mm10	0	NA	1
BEX1	0.255774	0.794951		10	27	1	eptFus1	0	NA	1
BFAR	0.453244	0.794951		13	31	1	myoLuc2	1	turTru2	1
BFSP1	0.0982661	0.794951		12	28	2	nanGal1;conCri1	0	NA	2
BHLHA15	0.500453	0.794951		11	25	0	NA	0	NA	0
BHLHA9	0.525707	0.794951		10	20	0	NA	1	turTru2	0
BHLHB9	0.46661	0.794951		14	28	0	NA	1	calJac3	0
BHLHE40	0.512784	0.794951		10	32	0	NA	0	NA	0
BHMG1	0.0747168	0.794951		12	31	2	eptFus1;chrAsi1	0	NA	2
BICC1	0.485269	0.794951		12	28	0	NA	0	NA	0
BICD2	0.50047	0.794951		14	30	0	NA	0	NA	0
BID	0.507724	0.794951		13	33	0	NA	1	turTru2	0
BIK	0.484399	0.794951		10	34	0	NA	0	NA	0
BIN1	0.569071	0.794951		11	24	0	NA	0	NA	0
BIN2	0.528338	0.794951		11	31	0	NA	0	NA	0
BIRC2	0.514824	0.794951		13	30	0	NA	1	turTru2	0
BIRC3	0.4002	0.794951		13	25	0	NA	0	NA	0
BIRC6	0.201231	0.794951		13	23	1	conCri1	0	NA	1
BIRC7	0.196599	0.794951		10	30	3	nanGal1;hetGla2;chrAsi1	2	ochPri3;loxAfr3	3
BIVM	0.37917	0.794951		12	30	0	NA	0	NA	0
BLK	0.13128	0.794951		10	30	0	NA	0	NA	0
BLOC1S2	0.526707	0.794951		13	31	0	NA	0	NA	0
BLOC1S4	0.593203	0.794951		9	23	0	NA	1	capHir1	0
BLOC1S6	0.526703	0.794951		13	32	0	NA	1	panHod1	0
BLVRB	0.385354	0.794951		12	31	0	NA	0	NA	0
BMP1	0.385995	0.794951		12	31	0	NA	0	NA	0
BMP15	0.611003	0.794951		13	24	1	nanGal1	2	otoGar3;ochPri3	1
BMP2	0.307028	0.794951		12	26	0	NA	0	NA	0
BMP2K	0.525193	0.794951		14	32	2	rn6;pteVam1	0	NA	2
BMP4	0.435486	0.794951		13	30	1	myoDav1	0	NA	1
BMPER	0.0539738	0.794951		11	30	1	eptFus1	0	NA	1
BMPR1A	0.500284	0.794951		13	33	0	NA	1	rheMac3	0
BMPR1B	0.503827	0.794951		12	29	0	NA	1	papAnu2	0
BMPR2	0.501215	0.794951		12	31	0	NA	2	panPan1;rhiRox1	0
BMS1	0.275389	0.794951		9	27	0	NA	0	NA	0
BNC1	0.538147	0.794951		10	33	0	NA	0	NA	0
BNC2	0.417841	0.794951		13	32	0	NA	0	NA	0
BNIP3	0.384343	0.794951		13	32	1	myoLuc2	0	NA	1
BNIPL	0.568193	0.794951		14	30	0	NA	0	NA	0
BOD1	0.274231	0.794951		11	20	0	NA	0	NA	0
BOD1L1	0.378589	0.794951		13	27	2	rn6;hetGla2	2	cavPor3;turTru2	2
BOK	0.547615	0.794951		10	22	0	NA	1	canFam3	0
BOLA2B	0.305545	0.794951		14	34	5	perManBai1;mm10;rn6;eptFus1;myoLuc2	2	speTri2;camFer1	2
BOP1	0.555875	0.794951		12	29	0	NA	1	panHod1	0
BORA	0.249025	0.794951		14	32	0	NA	0	NA	0
BPHL	0.450083	0.794951		12	33	0	NA	0	NA	0
BPIFA3	0.30605	0.794951		13	31	0	NA	0	NA	0
BPIFB1	0.566809	0.794951		12	28	0	NA	1	tarSyr2	0
BPIFB2	0.272467	0.794951		13	30	1	conCri1	2	turTru2;orcOrc1	1
BPIFB3	0.464301	0.794951		12	29	0	NA	3	rhiRox1;turTru2;orcOrc1	0
BPIFB4	0.59859	0.794951		12	25	0	NA	2	turTru2;orcOrc1	0
BPIFC	0.18995	0.794951		14	31	0	NA	0	NA	0
BPTF	0.555228	0.794951		12	28	0	NA	2	vicPac2;felCat8	0
BRAF	0.446276	0.794951		12	30	0	NA	0	NA	0
BRAP	0.493285	0.794951		14	30	0	NA	0	NA	0
BRCA2	0.493924	0.794951		10	30	1	chrAsi1	4	papAnu2;octDeg1;balAcu1;felCat8	1
BRD1	0.59772	0.794951		11	24	0	NA	0	NA	0
BRD2	0.544855	0.794951		13	32	0	NA	0	NA	0
BRD7	0.499971	0.794951		13	33	0	NA	1	rheMac3	0
BRD9	0.553303	0.794951		11	25	0	NA	0	NA	0
BRDT	0.570637	0.794951		9	30	1	myoDav1	0	NA	1
BRF2	0.545482	0.794951		13	31	0	NA	1	capHir1	0
BRICD5	0.339672	0.794951		14	32	0	NA	0	NA	0
BRINP2	0.445095	0.794951		13	27	1	rn6	0	NA	1
BRINP3	0.441127	0.794951		11	24	1	myoDav1	0	NA	1
BRIP1	0.398692	0.794951		13	27	0	NA	0	NA	0
BRIX1	0.21314	0.794951		12	30	0	NA	0	NA	0
BRMS1L	0.500671	0.794951		13	33	0	NA	0	NA	0
BRPF1	0.609315	0.794951		13	32	0	NA	0	NA	0
BRPF3	0.565964	0.794951		12	32	0	NA	0	NA	0
BRSK2	0.519467	0.794951		7	22	0	NA	0	NA	0
BRWD1	0.50305	0.794951		9	30	0	NA	0	NA	0
BRWD3	0.440636	0.794951		11	23	0	NA	0	NA	0
BSCL2	0.339164	0.794951		12	31	0	NA	1	turTru2	0
BSN	0.321661	0.794951		13	26	1	eptFus1	0	NA	1
BSND	0.495506	0.794951		12	29	0	NA	0	NA	0
BST1	0.513927	0.794951		12	32	0	NA	1	odoRosDiv1	0
BTAF1	0.454299	0.794951		12	29	0	NA	1	papAnu2	0
BTBD10	0.590527	0.794951		11	34	0	NA	0	NA	0
BTBD16	0.143696	0.794951		11	31	0	NA	0	NA	0
BTBD17	0.517913	0.794951		10	19	0	NA	2	papAnu2;bisBis1	0
BTBD19	0.507859	0.794951		12	32	0	NA	0	NA	0
BTBD3	0.542131	0.794951		13	27	0	NA	0	NA	0
BTBD8	0.0881553	0.794951		11	33	1	chrAsi1	0	NA	1
BTF3L4	0.55216	0.794951		14	30	0	NA	0	NA	0
BTG4	0.112434	0.794951		14	31	0	NA	0	NA	0
BTK	0.453208	0.794951		14	29	0	NA	0	NA	0
BTN1A1	0.507669	0.794951		12	32	0	NA	0	NA	0
BTN2A1	0.0951312	0.794951		9	26	9	micOch1;perManBai1;mm10;nanGal1;hetGla2;eptFus1;myoDav1;triMan1;chrAsi1	5	cavPor3;oryCun2;equCab2;cerSim1;loxAfr3	5
BTNL2	0.530992	0.794951		10	28	3	pteAle1;pteVam1;myoDav1	5	chlSab2;calJac3;tarSyr2;cerSim1;loxAfr3	1
BTNL9	0.407996	0.794951		12	19	2	rn6;triMan1	1	turTru2	2
BUB3	0.50034	0.794951		13	32	0	NA	1	rheMac3	0
BUD13	0.336822	0.794951		12	30	3	conCri1;triMan1;chrAsi1	9	tarSyr2;otoGar3;orcOrc1;balAcu1;canFam3;musFur1;odoRosDiv1;lepWed1;loxAfr3	3
BVES	0.441919	0.794951		12	33	0	NA	0	NA	0
BYSL	0.508993	0.794951		14	29	0	NA	0	NA	0
BZRAP1	0.502707	0.794951		13	24	0	NA	0	NA	0
BZW1	0.534303	0.794951		14	30	0	NA	0	NA	0
BZW2	0.419337	0.794951		12	32	0	NA	0	NA	0
C10orf10	0.0876058	0.794951		13	33	1	chrAsi1	0	NA	1
C10orf107	0.500218	0.794951		13	33	0	NA	1	rheMac3	0
C10orf11	0.307119	0.794951		12	26	0	NA	0	NA	0
C10orf113	0.124327	0.794951		11	30	10	micOch1;perManBai1;mm10;rn6;hetGla2;pteAle1;eptFus1;myoDav1;myoLuc2;conCri1	18	ponAbe2;calJac3;saiBol1;tarSyr2;otoGar3;speTri2;oryCun2;ochPri3;vicPac2;orcOrc1;bosTau8;bisBis1;capHir1;equCab2;cerSim1;felCat8;odoRosDiv1;lepWed1	4
C10orf120	0.377872	0.794951		10	33	0	NA	0	NA	0
C10orf128	0.24803	0.794951		13	30	1	hetGla2	1	orcOrc1	1
C10orf131	0.540888	0.794951		14	31	1	hetGla2	5	otoGar3;bosTau8;bisBis1;capHir1;cerSim1	1
C10orf32	0.542213	0.794951		14	31	0	NA	0	NA	0
C10orf32_ASMT	0.542213	0.794951		14	31	0	NA	0	NA	0
C10orf53	0.518763	0.794951		13	31	0	NA	0	NA	0
C10orf71	0.414654	0.794951		12	28	1	myoDav1	0	NA	1
C10orf76	0.411792	0.794951		11	23	0	NA	0	NA	0
C10orf88	0.500846	0.794951		8	28	0	NA	0	NA	0
C11orf1	0.511382	0.794951		13	33	0	NA	0	NA	0
C11orf16	0.432233	0.794951		14	34	0	NA	6	rheMac3;macFas5;papAnu2;chlSab2;rhiRox1;lepWed1	0
C11orf21	0.515517	0.794951		9	30	8	micOch1;perManBai1;mm10;nanGal1;hetGla2;pteAle1;pteVam1;eptFus1	19	papAnu2;tarSyr2;speTri2;cavPor3;octDeg1;ochPri3;vicPac2;camFer1;turTru2;orcOrc1;balAcu1;panHod1;bosTau8;capHir1;cerSim1;canFam3;musFur1;odoRosDiv1;lepWed1	3
C11orf24	0.462333	0.794951		10	28	0	NA	0	NA	0
C11orf30	0.502845	0.794951		14	31	0	NA	1	turTru2	0
C11orf31	0.466242	0.794951		13	30	0	NA	1	bisBis1	0
C11orf42	0.588347	0.794951		14	31	0	NA	0	NA	0
C11orf44	0.451831	0.794951		10	32	9	micOch1;mm10;rn6;nanGal1;hetGla2;pteAle1;myoDav1;myoLuc2;conCri1	23	rheMac3;macFas5;papAnu2;calJac3;saiBol1;tarSyr2;otoGar3;speTri2;cavPor3;octDeg1;oryCun2;ochPri3;vicPac2;camFer1;orcOrc1;balAcu1;panHod1;capHir1;equCab2;cerSim1;felCat8;canFam3;musFur1	4
C11orf49	0.405308	0.794951		13	31	0	NA	0	NA	0
C11orf53	0.378984	0.794951		14	28	0	NA	0	NA	0
C11orf54	0.501948	0.794951		13	34	0	NA	0	NA	0
C11orf57	0.526829	0.794951		14	31	0	NA	0	NA	0
C11orf63	0.34756	0.794951		14	30	2	eptFus1;myoDav1	1	panPan1	1
C11orf71	0.217644	0.794951		8	28	0	NA	0	NA	0
C11orf74	0.498349	0.794951		12	32	0	NA	0	NA	0
C11orf86	0.571664	0.794951		12	31	0	NA	1	capHir1	0
C11orf87	0.393651	0.794951		12	25	0	NA	0	NA	0
C11orf88	0.599004	0.794951		13	34	0	NA	3	felCat8;musFur1;odoRosDiv1	0
C11orf91	0.45892	0.794951		13	20	0	NA	1	tarSyr2	0
C12orf29	0.539646	0.794951		13	31	0	NA	1	turTru2	0
C12orf4	0.0536636	0.794951		13	33	0	NA	0	NA	0
C12orf42	0.0444605	0.794951		12	29	6	nanGal1;hetGla2;eptFus1;myoDav1;myoLuc2;triMan1	7	octDeg1;balAcu1;panHod1;bosTau8;bisBis1;capHir1;canFam3	4
C12orf45	0.576446	0.794951		12	26	0	NA	2	cavPor3;octDeg1	0
C12orf54	0.0998807	0.794951		13	28	0	NA	2	panPan1;rhiRox1	0
C12orf56	0.557262	0.794951		11	28	0	NA	2	orcOrc1;odoRosDiv1	0
C12orf57	0.543961	0.794951		14	33	0	NA	0	NA	0
C12orf60	0.209533	0.794951		13	33	2	nanGal1;pteAle1	6	panPan1;calJac3;tarSyr2;octDeg1;turTru2;lepWed1	2
C12orf65	0.498718	0.794951		14	30	0	NA	0	NA	0
C12orf66	0.382985	0.794951		13	33	0	NA	0	NA	0
C12orf73	0.5909	0.794951		14	34	1	mm10	0	NA	1
C12orf76	0.403904	0.794951		12	32	1	micOch1	1	loxAfr3	1
C14orf119	0.53592	0.794951		13	33	0	NA	0	NA	0
C14orf142	0.503598	0.794951		13	34	0	NA	0	NA	0
C14orf166	0.554022	0.794951		14	31	0	NA	0	NA	0
C14orf169	0.238913	0.794951		11	22	0	NA	0	NA	0
C14orf180	0.442668	0.794951		10	26	0	NA	0	NA	0
C14orf2	0.157558	0.794951		14	33	0	NA	0	NA	0
C14orf28	0.423319	0.794951		13	34	0	NA	0	NA	0
C14orf79	0.137594	0.794951		12	27	2	myoDav1;conCri1	2	otoGar3;ochPri3	2
C14orf80	0.524832	0.794951		9	27	0	NA	1	camFer1	0
C14orf93	0.507891	0.794951		14	30	0	NA	0	NA	0
C15orf26	0.50061	0.794951		8	33	0	NA	1	papAnu2	0
C15orf39	0.0880774	0.794951		11	30	0	NA	1	bosTau8	0
C15orf40	0.0585128	0.794951		10	26	1	myoDav1	0	NA	1
C15orf43	0.500807	0.794951		11	30	0	NA	1	panPan1	0
C15orf52	0.544735	0.794951		14	33	0	NA	2	orcOrc1;capHir1	0
C15orf54	0.216412	0.794951		12	31	10	mm10;rn6;nanGal1;hetGla2;pteAle1;eptFus1;myoDav1;myoLuc2;conCri1;chrAsi1	25	rheMac3;macFas5;papAnu2;chlSab2;rhiRox1;calJac3;saiBol1;otoGar3;speTri2;cavPor3;octDeg1;oryCun2;ochPri3;vicPac2;camFer1;orcOrc1;balAcu1;bisBis1;equCab2;cerSim1;felCat8;canFam3;musFur1;odoRosDiv1;loxAfr3	5
C15orf56	0.520739	0.794951		11	31	5	micOch1;perManBai1;nanGal1;eptFus1;conCri1	18	rhiRox1;saiBol1;tarSyr2;otoGar3;speTri2;octDeg1;oryCun2;ochPri3;turTru2;orcOrc1;panHod1;bosTau8;bisBis1;capHir1;cerSim1;canFam3;musFur1;lepWed1	3
C15orf61	0.58689	0.794951		7	22	0	NA	0	NA	0
C16orf13	0.569532	0.794951		13	30	0	NA	0	NA	0
C16orf45	0.531872	0.794951		13	31	0	NA	1	panPan1	0
C16orf46	0.505293	0.794951		14	34	0	NA	0	NA	0
C16orf59	0.523861	0.794951		13	32	0	NA	0	NA	0
C16orf62	0.500701	0.794951		10	29	0	NA	0	NA	0
C16orf70	0.579179	0.794951		14	31	0	NA	0	NA	0
C16orf71	0.327813	0.794951		13	31	0	NA	1	macFas5	0
C16orf74	0.501319	0.794951		14	31	0	NA	1	panPan1	0
C16orf78	0.26358	0.794951		12	32	0	NA	2	turTru2;orcOrc1	0
C16orf89	0.538673	0.794951		14	33	0	NA	2	rhiRox1;orcOrc1	0
C16orf90	0.0940423	0.794951		14	32	1	hetGla2	3	orcOrc1;balAcu1;panHod1	1
C16orf93	0.538879	0.794951		14	33	0	NA	0	NA	0
C16orf95	0.537307	0.794951		11	22	1	eptFus1	2	saiBol1;cavPor3	1
C16orf96	0.460367	0.794951		13	30	7	hetGla2;pteAle1;eptFus1;myoDav1;myoLuc2;conCri1;triMan1	18	panPan1;ponAbe2;calJac3;tarSyr2;octDeg1;oryCun2;ochPri3;vicPac2;camFer1;turTru2;orcOrc1;equCab2;cerSim1;felCat8;canFam3;musFur1;odoRosDiv1;loxAfr3	4
C17orf102	0.269444	0.794951		12	30	8	micOch1;perManBai1;nanGal1;hetGla2;eptFus1;myoDav1;myoLuc2;conCri1	9	ponAbe2;rhiRox1;calJac3;otoGar3;speTri2;cavPor3;octDeg1;ochPri3;vicPac2	4
C17orf104	0.54459	0.794951		14	33	0	NA	0	NA	0
C17orf107	0.227668	0.794951		12	29	1	nanGal1	2	calJac3;turTru2	1
C17orf47	0.128537	0.794951		12	32	2	rn6;myoDav1	0	NA	2
C17orf58	0.507086	0.794951		14	28	0	NA	0	NA	0
C17orf59	0.249227	0.794951		13	28	0	NA	0	NA	0
C17orf67	0.0623727	0.794951		13	31	1	triMan1	1	ponAbe2	1
C17orf70	0.593741	0.794951		10	31	0	NA	0	NA	0
C17orf74	0.510866	0.794951		12	28	0	NA	1	turTru2	0
C17orf75	0.0715751	0.794951		14	30	0	NA	0	NA	0
C17orf82	0.35029	0.794951		14	29	12	micOch1;perManBai1;mm10;rn6;nanGal1;pteAle1;pteVam1;myoDav1;myoLuc2;conCri1;triMan1;chrAsi1	20	rheMac3;macFas5;papAnu2;rhiRox1;calJac3;otoGar3;speTri2;cavPor3;oryCun2;vicPac2;panHod1;bosTau8;bisBis1;equCab2;cerSim1;felCat8;musFur1;odoRosDiv1;lepWed1;loxAfr3	5
C17orf85	0.435038	0.794951		13	30	1	myoDav1	0	NA	1
C17orf89	0.519071	0.794951		11	22	0	NA	1	turTru2	0
C17orf96	0.533732	0.794951		10	19	0	NA	1	panPan1	0
C17orf99	0.501009	0.794951		13	33	3	pteAle1;pteVam1;triMan1	14	calJac3;otoGar3;speTri2;vicPac2;camFer1;turTru2;orcOrc1;balAcu1;panHod1;bosTau8;bisBis1;capHir1;equCab2;felCat8	2
C18orf25	0.523648	0.794951		14	31	0	NA	0	NA	0
C18orf42	0.606919	0.794951		14	30	0	NA	0	NA	0
C18orf54	0.311903	0.794951		14	32	1	chrAsi1	0	NA	1
C18orf63	0.0547067	0.794951		12	31	0	NA	0	NA	0
C18orf8	0.566517	0.794951		13	30	0	NA	1	canFam3	0
C19orf12	0.252083	0.794951		11	32	0	NA	0	NA	0
C19orf18	0.310981	0.794951		9	30	0	NA	0	NA	0
C19orf24	0.440827	0.794951		14	21	0	NA	0	NA	0
C19orf25	0.326491	0.794951		13	28	0	NA	0	NA	0
C19orf26	0.279833	0.794951		14	25	1	conCri1	0	NA	1
C19orf33	0.0916432	0.794951		13	28	2	pteAle1;eptFus1	1	turTru2	1
C19orf43	0.522688	0.794951		13	24	0	NA	0	NA	0
C19orf45	0.19133	0.794951		9	25	0	NA	3	turTru2;orcOrc1;balAcu1	0
C19orf48	0.615795	0.794951		11	32	4	perManBai1;eptFus1;myoDav1;conCri1	11	papAnu2;calJac3;tarSyr2;otoGar3;cavPor3;octDeg1;ochPri3;turTru2;panHod1;cerSim1;loxAfr3	3
C19orf53	0.281992	0.794951		14	30	0	NA	0	NA	0
C19orf54	0.122187	0.794951		11	34	0	NA	0	NA	0
C19orf57	0.203095	0.794951		13	29	2	conCri1;triMan1	3	panPan1;ochPri3;loxAfr3	2
C19orf66	0.568884	0.794951		14	33	0	NA	0	NA	0
C19orf71	0.458354	0.794951		13	29	0	NA	1	turTru2	0
C19orf73	0.250831	0.794951		13	26	6	rn6;hetGla2;pteAle1;pteVam1;eptFus1;conCri1	10	otoGar3;cavPor3;octDeg1;ochPri3;turTru2;orcOrc1;balAcu1;bosTau8;bisBis1;musFur1	4
C19orf80	0.39491	0.794951		13	32	1	myoLuc2	0	NA	1
C1D	0.0534966	0.794951		14	32	0	NA	0	NA	0
C1QB	0.507593	0.794951		12	32	0	NA	0	NA	0
C1QBP	0.565867	0.794951		12	23	0	NA	1	rhiRox1	0
C1QC	0.617473	0.794951		14	33	0	NA	0	NA	0
C1QL4	0.50087	0.794951		13	25	0	NA	0	NA	0
C1QTNF1	0.407843	0.794951		14	31	0	NA	0	NA	0
C1QTNF2	0.249335	0.794951		14	30	0	NA	0	NA	0
C1QTNF6	0.51277	0.794951		12	30	0	NA	0	NA	0
C1QTNF8	0.318051	0.794951		12	24	6	perManBai1;mm10;rn6;nanGal1;hetGla2;triMan1	6	cavPor3;octDeg1;balAcu1;canFam3;odoRosDiv1;loxAfr3	3
C1QTNF9	0.501117	0.794951		14	33	0	NA	2	panPan1;rhiRox1	0
C1QTNF9B	0.502382	0.794951		14	32	0	NA	0	NA	0
C1R	0.511424	0.794951		13	28	0	NA	2	macFas5;papAnu2	0
C1orf100	0.272653	0.794951		12	33	1	nanGal1	0	NA	1
C1orf101	0.119677	0.794951		7	28	0	NA	0	NA	0
C1orf110	0.574594	0.794951		10	32	0	NA	2	orcOrc1;balAcu1	0
C1orf111	0.573072	0.794951		14	34	0	NA	0	NA	0
C1orf112	0.155159	0.794951		10	30	0	NA	0	NA	0
C1orf116	0.312386	0.794951		11	31	0	NA	1	vicPac2	0
C1orf131	0.502176	0.794951		13	32	0	NA	1	papAnu2	0
C1orf141	0.411185	0.794951		13	31	0	NA	3	vicPac2;turTru2;orcOrc1	0
C1orf146	0.119546	0.794951		14	32	0	NA	0	NA	0
C1orf159	0.283002	0.794951		11	29	2	pteAle1;pteVam1	0	NA	1
C1orf168	0.248215	0.794951		11	30	1	nanGal1	0	NA	1
C1orf174	0.508	0.794951		12	30	0	NA	0	NA	0
C1orf186	0.471474	0.794951		13	33	4	micOch1;perManBai1;mm10;nanGal1	2	oryCun2;ochPri3	1
C1orf194	0.508647	0.794951		14	32	0	NA	0	NA	0
C1orf210	0.583768	0.794951		14	33	0	NA	0	NA	0
C1orf216	0.478996	0.794951		14	34	0	NA	0	NA	0
C1orf226	0.551217	0.794951		14	34	0	NA	0	NA	0
C1orf228	0.450903	0.794951		12	23	0	NA	1	lepWed1	0
C1orf234	0.276924	0.794951		13	32	0	NA	0	NA	0
C1orf27	0.0726694	0.794951		12	31	0	NA	0	NA	0
C1orf35	0.048753	0.794951		12	28	3	eptFus1;myoDav1;myoLuc2	0	NA	1
C1orf50	0.513256	0.794951		14	32	0	NA	0	NA	0
C1orf52	0.54122	0.794951		11	31	0	NA	1	capHir1	0
C1orf64	0.178567	0.794951		13	32	1	perManBai1	0	NA	1
C1orf68	0.565753	0.794951		13	28	2	rn6;pteVam1	2	papAnu2;panHod1	2
C1orf86	0.423721	0.794951		10	22	0	NA	1	turTru2	0
C1orf94	0.254447	0.794951		13	28	0	NA	0	NA	0
C1orf95	0.504862	0.794951		8	18	0	NA	0	NA	0
C2	0.504101	0.794951		14	33	0	NA	0	NA	0
C20orf144	0.370578	0.794951		11	22	1	myoLuc2	1	bisBis1	1
C20orf173	0.609894	0.794951		14	34	4	micOch1;nanGal1;hetGla2;conCri1	7	speTri2;cavPor3;octDeg1;oryCun2;ochPri3;musFur1;loxAfr3	3
C20orf194	0.511749	0.794951		9	30	0	NA	1	turTru2	0
C20orf202	0.372818	0.794951		12	31	0	NA	0	NA	0
C21orf2	0.225185	0.794951		12	30	0	NA	0	NA	0
C21orf33	0.571389	0.794951		10	28	0	NA	0	NA	0
C21orf58	0.598909	0.794951		13	33	0	NA	2	otoGar3;canFam3	0
C21orf62	0.145664	0.794951		12	33	1	micOch1	0	NA	1
C22orf23	0.403927	0.794951		14	31	0	NA	0	NA	0
C22orf31	0.260431	0.794951		14	33	5	micOch1;perManBai1;mm10;rn6;conCri1	3	octDeg1;turTru2;orcOrc1	2
C22orf39	0.582141	0.794951		14	29	0	NA	0	NA	0
C22orf46	0.0491246	0.794951		14	34	0	NA	1	calJac3	0
C2CD2	0.144679	0.794951		11	29	1	nanGal1	0	NA	1
C2CD2L	0.571561	0.794951		14	32	0	NA	0	NA	0
C2CD3	0.337102	0.794951		14	30	0	NA	0	NA	0
C2CD5	0.500399	0.794951		11	31	0	NA	0	NA	0
C2orf16	0.180807	0.794951		8	21	4	micOch1;mm10;hetGla2;myoDav1	4	papAnu2;cavPor3;orcOrc1;panHod1	3
C2orf42	0.500783	0.794951		12	29	0	NA	1	macFas5	0
C2orf43	0.418057	0.794951		13	30	0	NA	0	NA	0
C2orf44	0.555387	0.794951		14	34	0	NA	0	NA	0
C2orf50	0.260333	0.794951		10	32	2	pteAle1;myoLuc2	6	oryCun2;turTru2;orcOrc1;balAcu1;capHir1;odoRosDiv1	1
C2orf54	0.591898	0.794951		13	29	0	NA	4	turTru2;orcOrc1;balAcu1;lepWed1	0
C2orf57	0.41839	0.794951		11	30	3	nanGal1;hetGla2;triMan1	9	oryCun2;vicPac2;camFer1;turTru2;orcOrc1;balAcu1;panHod1;bosTau8;loxAfr3	3
C2orf68	0.50309	0.794951		13	26	0	NA	0	NA	0
C2orf69	0.605207	0.794951		11	25	0	NA	0	NA	0
C2orf70	0.0948131	0.794951		14	33	0	NA	2	turTru2;orcOrc1	0
C2orf71	0.50965	0.794951		13	30	0	NA	0	NA	0
C2orf73	0.409608	0.794951		13	32	0	NA	0	NA	0
C2orf74	0.516975	0.794951		12	32	0	NA	1	orcOrc1	0
C2orf78	0.446316	0.794951		8	29	4	mm10;rn6;hetGla2;myoLuc2	7	calJac3;tarSyr2;speTri2;cavPor3;octDeg1;ochPri3;orcOrc1	3
C2orf80	0.429659	0.794951		14	33	0	NA	0	NA	0
C2orf88	0.303899	0.794951		14	34	1	eptFus1	0	NA	1
C2orf91	0.500001	0.794951		12	30	9	micOch1;mm10;rn6;hetGla2;pteAle1;pteVam1;eptFus1;myoDav1;conCri1	19	ponAbe2;rheMac3;macFas5;otoGar3;speTri2;cavPor3;octDeg1;ochPri3;vicPac2;camFer1;orcOrc1;balAcu1;panHod1;bosTau8;equCab2;felCat8;canFam3;musFur1;lepWed1	4
C3orf14	0.487258	0.794951		14	33	0	NA	0	NA	0
C3orf18	0.550805	0.794951		12	34	0	NA	0	NA	0
C3orf20	0.235033	0.794951		13	28	1	hetGla2	1	turTru2	1
C3orf22	0.0482339	0.794951		12	29	3	nanGal1;myoDav1;myoLuc2	0	NA	2
C3orf52	0.136007	0.794951		14	24	0	NA	0	NA	0
C3orf56	0.245918	0.794951		7	21	5	perManBai1;rn6;pteAle1;myoDav1;conCri1	4	balAcu1;bosTau8;cerSim1;musFur1	3
C3orf58	0.500573	0.794951		11	26	0	NA	0	NA	0
C3orf84	0.068171	0.794951		14	31	0	NA	0	NA	0
C4A	0.124418	0.794951		8	22	2	mm10;myoDav1	0	NA	2
C4BPA	0.50333	0.794951		8	26	0	NA	1	papAnu2	0
C4orf26	0.607161	0.794951		14	33	0	NA	1	balAcu1	0
C4orf27	0.556097	0.794951		14	33	0	NA	2	calJac3;saiBol1	0
C4orf33	0.0807226	0.794951		11	31	1	nanGal1	0	NA	1
C4orf45	0.507868	0.794951		13	32	0	NA	0	NA	0
C4orf46	0.0592837	0.794951		13	30	1	hetGla2	0	NA	1
C4orf47	0.159432	0.794951		13	29	0	NA	0	NA	0
C4orf50	0.355308	0.794951		10	28	0	NA	1	canFam3	0
C4orf51	0.0738966	0.794951		14	33	4	micOch1;nanGal1;hetGla2;conCri1	6	turTru2;orcOrc1;balAcu1;cerSim1;canFam3;odoRosDiv1	3
C5	0.587003	0.794951		11	28	0	NA	2	rheMac3;equCab2	0
C5AR1	0.446173	0.794951		12	32	0	NA	0	NA	0
C5orf22	0.457715	0.794951		14	30	1	myoDav1	0	NA	1
C5orf34	0.479474	0.794951		12	29	0	NA	0	NA	0
C5orf42	0.441679	0.794951		12	26	2	pteAle1;myoDav1	0	NA	1
C5orf45	0.220854	0.794951		13	32	1	myoDav1	2	papAnu2;ochPri3	1
C5orf49	0.144972	0.794951		10	20	0	NA	0	NA	0
C5orf51	0.489344	0.794951		12	32	0	NA	0	NA	0
C5orf55	0.360495	0.794951		7	23	6	micOch1;perManBai1;mm10;rn6;hetGla2;myoDav1	11	rheMac3;calJac3;otoGar3;speTri2;octDeg1;ochPri3;turTru2;orcOrc1;balAcu1;bosTau8;cerSim1	3
C5orf56	0.396684	0.794951		12	32	6	micOch1;nanGal1;hetGla2;pteAle1;myoDav1;myoLuc2	9	otoGar3;speTri2;oryCun2;ochPri3;vicPac2;camFer1;orcOrc1;balAcu1;panHod1	3
C5orf66	0.486014	0.794951		12	33	7	perManBai1;mm10;hetGla2;pteAle1;pteVam1;eptFus1;myoLuc2	24	ponAbe2;rheMac3;macFas5;papAnu2;chlSab2;rhiRox1;calJac3;saiBol1;tarSyr2;otoGar3;speTri2;cavPor3;octDeg1;camFer1;turTru2;orcOrc1;balAcu1;bosTau8;bisBis1;capHir1;equCab2;cerSim1;felCat8;canFam3	3
C6orf1	0.293491	0.794951		10	30	7	perManBai1;mm10;rn6;nanGal1;hetGla2;pteAle1;conCri1	14	panTro4;panPan1;papAnu2;rhiRox1;speTri2;ochPri3;vicPac2;panHod1;bosTau8;bisBis1;equCab2;felCat8;canFam3;odoRosDiv1	4
C6orf106	0.604539	0.794951		13	32	0	NA	0	NA	0
C6orf118	0.338455	0.794951		9	28	0	NA	0	NA	0
C6orf120	0.505199	0.794951		11	27	0	NA	0	NA	0
C6orf136	0.346172	0.794951		13	33	0	NA	0	NA	0
C6orf141	0.361324	0.794951		11	24	1	myoDav1	0	NA	1
C6orf15	0.318156	0.794951		11	33	2	eptFus1;myoDav1	1	canFam3	1
C6orf163	0.177896	0.794951		14	33	0	NA	0	NA	0
C6orf211	0.0669877	0.794951		14	33	0	NA	0	NA	0
C6orf223	0.532097	0.794951		11	34	9	mm10;rn6;nanGal1;hetGla2;eptFus1;myoDav1;conCri1;triMan1;chrAsi1	25	macFas5;papAnu2;chlSab2;rhiRox1;saiBol1;otoGar3;speTri2;cavPor3;octDeg1;oryCun2;ochPri3;camFer1;turTru2;orcOrc1;balAcu1;panHod1;bosTau8;bisBis1;equCab2;cerSim1;felCat8;musFur1;odoRosDiv1;lepWed1;loxAfr3	6
C6orf25	0.543476	0.794951		14	32	0	NA	0	NA	0
C6orf48	0.514421	0.794951		11	34	6	mm10;hetGla2;pteAle1;myoDav1;conCri1;triMan1	16	rheMac3;macFas5;papAnu2;rhiRox1;calJac3;cavPor3;octDeg1;camFer1;turTru2;orcOrc1;panHod1;capHir1;cerSim1;felCat8;canFam3;odoRosDiv1	5
C6orf57	0.553899	0.794951		13	33	0	NA	0	NA	0
C6orf58	0.516915	0.794951		9	31	2	mm10;triMan1	4	papAnu2;bosTau8;capHir1;cerSim1	2
C6orf89	0.507877	0.794951		13	29	0	NA	0	NA	0
C7orf25	0.153327	0.794951		13	33	0	NA	0	NA	0
C7orf34	0.0715641	0.794951		10	32	5	micOch1;nanGal1;myoDav1;myoLuc2;conCri1	2	speTri2;cerSim1	3
C7orf43	0.33608	0.794951		13	23	0	NA	0	NA	0
C7orf50	0.595381	0.794951		10	23	0	NA	0	NA	0
C7orf57	0.504169	0.794951		11	31	0	NA	1	panPan1	0
C8orf37	0.500316	0.794951		10	27	0	NA	0	NA	0
C8orf44_SGK3	0.579367	0.794951		11	28	0	NA	0	NA	0
C8orf58	0.476447	0.794951		13	29	0	NA	0	NA	0
C8orf59	0.5018	0.794951		14	31	0	NA	0	NA	0
C8orf74	0.478497	0.794951		11	29	0	NA	1	papAnu2	0
C8orf76	0.393536	0.794951		12	28	0	NA	0	NA	0
C8orf87	0.403891	0.794951		9	31	8	micOch1;perManBai1;mm10;rn6;nanGal1;hetGla2;pteAle1;eptFus1	16	rheMac3;macFas5;papAnu2;chlSab2;rhiRox1;calJac3;saiBol1;speTri2;cavPor3;octDeg1;panHod1;bosTau8;bisBis1;capHir1;equCab2;canFam3	3
C8orf89	0.143876	0.794951		13	31	0	NA	0	NA	0
C9	0.618092	0.794951		13	32	0	NA	3	rheMac3;tarSyr2;octDeg1	0
C9orf114	0.572423	0.794951		14	29	0	NA	0	NA	0
C9orf139	0.258351	0.794951		9	29	7	micOch1;mm10;rn6;nanGal1;hetGla2;pteAle1;pteVam1	18	rheMac3;macFas5;papAnu2;chlSab2;otoGar3;speTri2;octDeg1;ochPri3;vicPac2;turTru2;orcOrc1;balAcu1;panHod1;capHir1;cerSim1;felCat8;canFam3;musFur1	3
C9orf153	0.101763	0.794951		12	31	1	rn6	0	NA	1
C9orf16	0.491462	0.794951		14	27	0	NA	0	NA	0
C9orf163	0.392398	0.794951		10	31	9	perManBai1;mm10;nanGal1;hetGla2;eptFus1;myoDav1;myoLuc2;conCri1;triMan1	24	rhiRox1;calJac3;saiBol1;tarSyr2;otoGar3;speTri2;cavPor3;octDeg1;vicPac2;camFer1;turTru2;orcOrc1;balAcu1;panHod1;bosTau8;bisBis1;capHir1;equCab2;cerSim1;felCat8;canFam3;odoRosDiv1;lepWed1;loxAfr3	5
C9orf171	0.579342	0.794951		12	29	0	NA	0	NA	0
C9orf173	0.450559	0.794951		11	25	1	nanGal1	3	vicPac2;orcOrc1;balAcu1	1
C9orf24	0.0645503	0.794951		13	29	1	nanGal1	0	NA	1
C9orf41	0.54327	0.794951		13	33	0	NA	0	NA	0
C9orf43	0.0456773	0.794951		14	33	2	hetGla2;conCri1	1	loxAfr3	2
C9orf47	0.231674	0.794951		10	21	6	perManBai1;mm10;rn6;pteAle1;eptFus1;conCri1	6	calJac3;otoGar3;octDeg1;camFer1;bisBis1;equCab2	3
C9orf50	0.376607	0.794951		12	22	2	rn6;nanGal1	3	otoGar3;orcOrc1;lepWed1	1
C9orf62	0.236419	0.794951		8	29	7	micOch1;perManBai1;mm10;rn6;nanGal1;pteAle1;triMan1	20	panTro4;panPan1;ponAbe2;rheMac3;macFas5;papAnu2;rhiRox1;calJac3;saiBol1;otoGar3;cavPor3;vicPac2;turTru2;orcOrc1;panHod1;capHir1;equCab2;cerSim1;musFur1;odoRosDiv1	3
C9orf72	0.472972	0.794951		13	31	0	NA	1	panPan1	0
C9orf85	0.564458	0.794951		13	34	0	NA	0	NA	0
C9orf89	0.0940057	0.794951		12	31	0	NA	0	NA	0
C9orf9	0.573021	0.794951		13	31	0	NA	1	orcOrc1	0
C9orf91	0.523135	0.794951		13	34	0	NA	0	NA	0
CA1	0.189365	0.794951		7	30	0	NA	1	calJac3	0
CA11	0.544104	0.794951		12	30	0	NA	0	NA	0
CA14	0.393528	0.794951		14	33	0	NA	0	NA	0
CA5B	0.46429	0.794951		13	28	0	NA	0	NA	0
CA6	0.418642	0.794951		12	30	0	NA	0	NA	0
CA8	0.570575	0.794951		10	31	0	NA	0	NA	0
CA9	0.0449697	0.794951		14	33	0	NA	0	NA	0
CAAP1	0.286034	0.794951		12	28	0	NA	0	NA	0
CAB39L	0.551776	0.794951		12	31	0	NA	1	panHod1	0
CABIN1	0.533871	0.794951		7	26	0	NA	1	panHod1	0
CABP4	0.546001	0.794951		13	30	0	NA	0	NA	0
CABP7	0.542117	0.794951		13	33	0	NA	1	capHir1	0
CACHD1	0.441378	0.794951		14	30	0	NA	0	NA	0
CACNA1C	0.54056	0.794951		13	21	1	nanGal1	1	camFer1	1
CACNA1D	0.519168	0.794951		12	26	0	NA	1	papAnu2	0
CACNA1F	0.26563	0.794951		13	27	2	nanGal1;chrAsi1	0	NA	2
CACNA1G	0.507959	0.794951		11	27	0	NA	1	turTru2	0
CACNA1H	0.447911	0.794951		11	22	1	myoDav1	2	turTru2;bosTau8	1
CACNA1S	0.468535	0.794951		11	23	0	NA	0	NA	0
CACNA2D1	0.498416	0.794951		12	25	0	NA	1	rheMac3	0
CACNA2D2	0.519012	0.794951		12	28	0	NA	1	camFer1	0
CACNA2D3	0.518605	0.794951		12	23	0	NA	1	rheMac3	0
CACNA2D4	0.214424	0.794951		10	26	2	nanGal1;chrAsi1	6	turTru2;orcOrc1;balAcu1;panHod1;bosTau8;capHir1	2
CACNB1	0.462427	0.794951		12	30	0	NA	1	ponAbe2	0
CACNG2	0.509144	0.794951		12	23	0	NA	1	turTru2	0
CACNG7	0.500268	0.794951		10	32	0	NA	0	NA	0
CACYBP	0.576102	0.794951		13	34	0	NA	1	saiBol1	0
CAD	0.313293	0.794951		14	28	1	pteVam1	0	NA	1
CADM4	0.509918	0.794951		13	33	0	NA	0	NA	0
CADPS2	0.502815	0.794951		11	25	0	NA	1	rheMac3	0
CALB1	0.517054	0.794951		13	33	0	NA	0	NA	0
CALB2	0.437037	0.794951		13	28	0	NA	0	NA	0
CALCB	0.432968	0.794951		13	33	0	NA	0	NA	0
CALCOCO2	0.339886	0.794951		13	30	1	mm10	0	NA	1
CALCR	0.562494	0.794951		13	32	0	NA	0	NA	0
CALCRL	0.509667	0.794951		12	33	0	NA	1	turTru2	0
CALD1	0.416714	0.794951		10	28	4	micOch1;perManBai1;rn6;pteAle1	6	saiBol1;camFer1;balAcu1;felCat8;odoRosDiv1;lepWed1	2
CALHM1	0.509131	0.794951		14	30	0	NA	1	turTru2	0
CALHM3	0.496301	0.794951		11	30	0	NA	0	NA	0
CALM2	0.481381	0.794951		14	33	1	rn6	0	NA	1
CALML3	0.43138	0.794951		13	33	1	pteVam1	7	tarSyr2;otoGar3;vicPac2;camFer1;orcOrc1;panHod1;capHir1	1
CALML6	0.509666	0.794951		11	29	7	micOch1;perManBai1;mm10;rn6;nanGal1;conCri1;triMan1	7	cavPor3;octDeg1;vicPac2;camFer1;panHod1;capHir1;equCab2	3
CALR	0.602827	0.794951		14	33	0	NA	0	NA	0
CAMK1	0.573431	0.794951		13	31	0	NA	0	NA	0
CAMK1D	0.608287	0.794951		13	25	0	NA	0	NA	0
CAMK1G	0.043121	0.794951		11	29	0	NA	0	NA	0
CAMK2A	0.486967	0.794951		13	30	0	NA	0	NA	0
CAMK2B	0.596668	0.794951		11	27	0	NA	0	NA	0
CAMK2N1	0.501469	0.794951		10	25	0	NA	0	NA	0
CAMK2N2	0.417272	0.794951		12	18	0	NA	0	NA	0
CAMK4	0.608916	0.794951		12	23	0	NA	1	equCab2	0
CAMKK2	0.150697	0.794951		11	26	0	NA	0	NA	0
CAMKV	0.57337	0.794951		13	32	0	NA	0	NA	0
CAMLG	0.550146	0.794951		11	33	0	NA	0	NA	0
CAMP	0.545947	0.794951		10	31	0	NA	3	turTru2;orcOrc1;capHir1	0
CAMSAP1	0.558346	0.794951		10	29	0	NA	1	vicPac2	0
CAMSAP2	0.436033	0.794951		10	27	0	NA	0	NA	0
CAMSAP3	0.523493	0.794951		11	20	0	NA	0	NA	0
CAMTA2	0.604209	0.794951		14	33	0	NA	1	panHod1	0
CAND2	0.604512	0.794951		13	25	0	NA	0	NA	0
CANT1	0.507258	0.794951		9	31	0	NA	1	turTru2	0
CANX	0.369272	0.794951		13	30	0	NA	0	NA	0
CAP1	0.302296	0.794951		12	31	1	nanGal1	0	NA	1
CAPN1	0.454074	0.794951		11	28	1	myoDav1	1	capHir1	1
CAPN10	0.559753	0.794951		11	27	0	NA	1	vicPac2	0
CAPN14	0.345749	0.794951		12	31	8	micOch1;perManBai1;mm10;rn6;nanGal1;conCri1;triMan1;chrAsi1	8	saiBol1;tarSyr2;cavPor3;oryCun2;ochPri3;orcOrc1;balAcu1;loxAfr3	4
CAPN15	0.545321	0.794951		11	22	0	NA	0	NA	0
CAPN3	0.507562	0.794951		11	30	0	NA	0	NA	0
CAPN7	0.515662	0.794951		11	30	0	NA	0	NA	0
CAPN8	0.160289	0.794951		10	25	1	pteAle1	6	cavPor3;turTru2;orcOrc1;felCat8;musFur1;odoRosDiv1	1
CAPN9	0.432414	0.794951		9	29	0	NA	1	orcOrc1	0
CAPNS1	0.316385	0.794951		11	26	0	NA	0	NA	0
CAPRIN1	0.506962	0.794951		13	30	0	NA	1	bosTau8	0
CAPRIN2	0.430966	0.794951		13	31	1	rn6	1	papAnu2	1
CAPS	0.478238	0.794951		14	33	1	rn6	0	NA	1
CAPS2	0.518208	0.794951		11	30	0	NA	1	balAcu1	0
CAPSL	0.487687	0.794951		14	33	0	NA	0	NA	0
CAPZA1	0.531019	0.794951		12	29	0	NA	0	NA	0
CARD10	0.151255	0.794951		13	27	0	NA	0	NA	0
CARD11	0.357813	0.794951		9	27	0	NA	2	chlSab2;camFer1	0
CARD14	0.415659	0.794951		10	26	0	NA	2	turTru2;orcOrc1	0
CARD18	0.0767291	0.794951		7	19	3	hetGla2;pteAle1;eptFus1	5	speTri2;canFam3;musFur1;odoRosDiv1;lepWed1	2
CARD6	0.534446	0.794951		12	32	1	hetGla2	8	panPan1;cavPor3;vicPac2;camFer1;turTru2;orcOrc1;balAcu1;equCab2	1
CARF	0.480965	0.794951		12	29	0	NA	1	rheMac3	0
CARKD	0.245598	0.794951		12	29	0	NA	1	canFam3	0
CARM1	0.44313	0.794951		12	30	0	NA	0	NA	0
CARS	0.278674	0.794951		10	26	0	NA	0	NA	0
CARS2	0.444066	0.794951		12	22	0	NA	0	NA	0
CASC10	0.487236	0.794951		12	29	8	micOch1;perManBai1;mm10;rn6;nanGal1;pteVam1;eptFus1;myoLuc2	12	otoGar3;speTri2;camFer1;turTru2;orcOrc1;panHod1;bosTau8;bisBis1;capHir1;cerSim1;musFur1;lepWed1	2
CASC3	0.513374	0.794951		13	29	0	NA	0	NA	0
CASC5	0.113029	0.794951		11	29	5	perManBai1;eptFus1;myoLuc2;triMan1;chrAsi1	0	NA	4
CASD1	0.542731	0.794951		12	32	0	NA	0	NA	0
CASKIN2	0.530868	0.794951		13	26	0	NA	0	NA	0
CASP1	0.584571	0.794951		10	26	0	NA	1	tarSyr2	0
CASP12	0.350831	0.794951		13	25	2	nanGal1;triMan1	4	speTri2;oryCun2;balAcu1;cerSim1	2
CASP16	0.600441	0.794951		13	34	1	myoLuc2	6	cavPor3;octDeg1;turTru2;orcOrc1;balAcu1;odoRosDiv1	1
CASP3	0.497372	0.794951		13	32	0	NA	0	NA	0
CASP4	0.0883428	0.794951		11	26	2	perManBai1;chrAsi1	0	NA	2
CASP6	0.11798	0.794951		10	31	0	NA	0	NA	0
CASQ1	0.507897	0.794951		14	33	0	NA	0	NA	0
CASQ2	0.507791	0.794951		13	33	0	NA	0	NA	0
CASS4	0.0962252	0.794951		13	30	0	NA	0	NA	0
CAST	0.562409	0.794951		12	32	0	NA	1	panTro4	0
CAT	0.398498	0.794951		13	32	1	myoLuc2	0	NA	1
CATIP	0.494796	0.794951		10	26	0	NA	1	panPan1	0
CATSPER3	0.397135	0.794951		14	30	0	NA	1	rhiRox1	0
CATSPERD	0.519943	0.794951		11	21	2	perManBai1;nanGal1	2	speTri2;panHod1	1
CATSPERG	0.537828	0.794951		9	27	0	NA	0	NA	0
CAV2	0.533935	0.794951		12	25	0	NA	0	NA	0
CBFA2T3	0.530697	0.794951		13	26	0	NA	0	NA	0
CBFB	0.566571	0.794951		12	20	0	NA	0	NA	0
CBL	0.37114	0.794951		11	30	0	NA	0	NA	0
CBLC	0.479959	0.794951		11	21	0	NA	1	panHod1	0
CBLL1	0.502274	0.794951		14	29	0	NA	0	NA	0
CBLN1	0.506148	0.794951		8	23	0	NA	1	turTru2	0
CBLN2	0.436315	0.794951		10	22	0	NA	0	NA	0
CBLN3	0.507165	0.794951		14	34	0	NA	0	NA	0
CBR3	0.569811	0.794951		13	27	0	NA	0	NA	0
CBWD1	0.411095	0.794951		11	28	0	NA	0	NA	0
CBWD5	0.501753	0.794951		11	25	0	NA	0	NA	0
CBX1	0.500223	0.794951		14	34	0	NA	0	NA	0
CBX3	0.500406	0.794951		13	30	0	NA	0	NA	0
CBX4	0.483149	0.794951		8	23	1	rn6	0	NA	1
CBX6	0.601876	0.794951		11	23	0	NA	1	panPan1	0
CBX7	0.507649	0.794951		11	28	0	NA	1	bisBis1	0
CBX8	0.091734	0.794951		12	30	1	chrAsi1	0	NA	1
CBY3	0.12903	0.794951		12	23	0	NA	0	NA	0
CC2D1A	0.259366	0.794951		12	26	0	NA	1	panTro4	0
CC2D1B	0.501224	0.794951		13	32	0	NA	1	chlSab2	0
CC2D2A	0.351177	0.794951		8	30	1	rn6	0	NA	1
[truncated: 11,150 more rows]
