# Supplementary material for: Vision-related convergent gene losses reveal SERPINE3’s unknown role in the eye
Source: eLife. 2022 Jun 21;11:e77999. doi: 10.7554/eLife.77999 (PMC9355568; doi:10.7554/eLife.77999)
Supplement: Figure 1—source data 6. [file elife-77999-fig1-data6.xls]

## Sheet: Figure 1 - Source data 6
Figure 1 - Source data 6: List of candidate genes of the forward genomics screen based on visual acuity threshold < 0.5
For comparison, we also tested a more stringent visual acuity cutoff (va <0.5) for defining the phenotype and rerun the screen with otherwise identical conditions. With the final filtering settings (column L), we retrieve 40 genes, of which 23 are shared with the final candidate gene set with va<1.
Of the genes passing our filters, SERPINE3 is 8th-ranked.
Gene symbol	P-value in Forward Genomics screen	Corrected P-value	Filter: P-value in Forward Genomics screen < 0.05	#Low-acuity species	#High-acuity species	#Losses in low-acuity species	Low-acuity species that have lost the gene	#Losses in high-acuity species	High-acuity species with losses	#Losses in low-acuity lineages	Filter: Loss > 2 low-acuity lineages
TSACC	8.49194e-20	1.12068e-15	YES	6	39	5	hetGla2;myoDav1;myoLuc2;conCri1;chrAsi1	0	NA	4	YES
LACTBL1	4.46348e-14	2.94523e-10	YES	5	23	3	nanGal1;hetGla2;chrAsi1	0	NA	3	YES
CRYBA4	8.10703e-14	3.56628e-10	YES	6	39	4	myoDav1;myoLuc2;conCri1;chrAsi1	0	NA	3	YES
CCL28	3.3491e-13	1.10495e-09	YES	5	40	0	NA	0	NA	0	NO
CRYBB1	1.27128e-11	3.35541e-08	YES	6	35	4	myoDav1;myoLuc2;conCri1;chrAsi1	0	NA	3	YES
GZMK	1.61747e-11	3.55762e-08	YES	4	41	3	nanGal1;conCri1;chrAsi1	0	NA	3	YES
BEST1	2.03163e-11	3.8302e-08	YES	5	37	3	nanGal1;hetGla2;myoLuc2	0	NA	3	YES
AF165138.7	2.83323e-10	4.67376e-07	YES	6	42	6	nanGal1;hetGla2;myoDav1;myoLuc2;conCri1;chrAsi1	3	perManBai1;cavPor3;eptFus1	5	YES
SERPINE3	3.94414e-10	5.78342e-07	YES	6	38	6	nanGal1;hetGla2;myoDav1;myoLuc2;conCri1;chrAsi1	1	eptFus1	5	YES
LYZL1	7.92445e-10	1.04579e-06	YES	6	37	4	nanGal1;hetGla2;myoDav1;myoLuc2	0	NA	3	YES
SHQ1	1.34391e-09	1.61232e-06	YES	4	36	0	NA	0	NA	0	NO
SGK494	1.48999e-09	1.63861e-06	YES	6	41	4	nanGal1;hetGla2;conCri1;chrAsi1	0	NA	4	YES
PEX13	3.82081e-08	2.65385e-05	YES	5	38	0	NA	0	NA	0	NO
EFCAB6	2.70859e-09	2.74964e-06	YES	3	34	2	nanGal1;hetGla2	1	orcOrc1	2	NO
MCEE	5.19949e-08	2.85907e-05	YES	5	40	2	myoDav1;myoLuc2	0	NA	1	NO
HRSP12	5.08758e-08	2.85907e-05	YES	6	41	0	NA	0	NA	0	NO
AGTRAP	4.22694e-09	3.9845e-06	YES	5	41	0	NA	0	NA	0	NO
MAATS1	6.8732e-09	6.04704e-06	YES	4	36	0	NA	0	NA	0	NO
TTC23L	7.67768e-09	6.33264e-06	YES	6	36	2	myoDav1;myoLuc2	0	NA	1	NO
ZKSCAN5	1.13084e-08	8.77862e-06	YES	6	36	0	NA	0	NA	0	NO
GUCA1B	2.07862e-08	1.52398e-05	YES	6	36	3	hetGla2;conCri1;chrAsi1	0	NA	3	YES
IGSF11	4.28196e-08	2.69091e-05	YES	5	37	2	myoLuc2;conCri1	0	NA	2	NO
VWCE	4.23404e-08	2.69091e-05	YES	4	33	0	NA	0	NA	0	NO
MST1	4.5754e-08	2.74462e-05	YES	5	37	0	NA	0	NA	0	NO
LYZL2	9.65547e-08	5.09693e-05	YES	3	38	3	nanGal1;hetGla2;myoLuc2	1	panPan1	3	YES
BIRC7	1.11287e-07	5.43947e-05	YES	3	37	3	nanGal1;hetGla2;chrAsi1	2	ochPri3;loxAfr3	3	YES
LRRK2	1.10448e-07	5.43947e-05	YES	3	30	0	NA	0	NA	0	NO
TOR1AIP1	1.3649e-07	6.43306e-05	YES	3	36	1	myoLuc2	0	NA	1	NO
GJA8	1.55352e-07	7.06958e-05	YES	3	38	1	chrAsi1	0	NA	1	NO
CLIP1	1.65165e-07	7.26561e-05	YES	6	40	1	conCri1	0	NA	1	NO
FADS3	1.91297e-07	7.6749e-05	YES	4	36	0	NA	0	NA	0	NO
LRRC18	1.97732e-07	7.6749e-05	YES	6	42	0	NA	0	NA	0	NO
ZBTB6	1.97732e-07	7.6749e-05	YES	6	42	0	NA	0	NA	0	NO
ZNF366	1.94944e-07	7.6749e-05	YES	5	38	0	NA	0	NA	0	NO
MAGEB1	2.22225e-07	8.37916e-05	YES	6	35	4	nanGal1;hetGla2;myoDav1;myoLuc2	1	ochPri3	3	YES
NFKBIB	2.73174e-07	0.000100141	YES	6	41	0	NA	0	NA	0	NO
ZNF214	2.93143e-07	0.000104557	YES	6	37	4	nanGal1;hetGla2;myoDav1;myoLuc2	3	perManBai1;mm10;rn6	3	YES
SMAD9	3.11877e-07	0.000108312	YES	4	37	1	myoLuc2	0	NA	1	NO
MOV10	3.31402e-07	0.000112141	YES	4	38	0	NA	0	NA	0	NO
EPG5	6.20263e-07	0.000199649	YES	4	36	1	myoLuc2	0	NA	1	NO
TWF2	6.08098e-07	0.000199649	YES	6	40	1	myoDav1	0	NA	1	NO
DLD	7.29122e-07	0.000229101	YES	4	39	0	NA	0	NA	0	NO
FAM167B	8.11686e-07	0.000243451	YES	5	41	0	NA	0	NA	0	NO
PPP4C	8.03526e-07	0.000243451	YES	6	41	0	NA	0	NA	0	NO
SLC26A3	8.39709e-07	0.000246259	YES	6	37	0	NA	0	NA	0	NO
TEFM	8.73647e-07	0.000250642	YES	5	38	1	myoLuc2	0	NA	1	NO
FNBP1	9.51567e-07	0.00026607	YES	5	33	1	myoDav1	0	NA	1	NO
PDE6H	1.00807e-06	0.00026607	YES	6	38	1	nanGal1	0	NA	1	NO
JADE1	1.00737e-06	0.00026607	YES	4	39	0	NA	0	NA	0	NO
RPL28	9.75331e-07	0.00026607	YES	4	39	0	NA	0	NA	0	NO
SLC40A1	1.0679e-06	0.000276335	YES	5	40	0	NA	0	NA	0	NO
PLA2G3	1.15332e-06	0.0002927	YES	5	40	0	NA	0	NA	0	NO
LDOC1L	1.30419e-06	0.000324744	YES	4	38	0	NA	0	NA	0	NO
ZBTB14	1.35109e-06	0.000330193	YES	5	39	0	NA	0	NA	0	NO
UBE2U	1.41705e-06	0.000340015	YES	5	39	2	nanGal1;hetGla2	0	NA	2	NO
CEP192	1.49176e-06	0.000345521	YES	5	36	1	myoLuc2	0	NA	1	NO
SLC6A2	1.49236e-06	0.000345521	YES	4	37	0	NA	0	NA	0	NO
RNF183	1.55982e-06	0.000354913	YES	6	40	2	myoDav1;myoLuc2	0	NA	1	NO
ARL16	1.61107e-06	0.000360361	YES	4	36	1	chrAsi1	0	NA	1	NO
TSR2	1.65687e-06	0.000364429	YES	5	37	0	NA	0	NA	0	NO
SPAG6	1.69955e-06	0.000367687	YES	3	40	3	nanGal1;hetGla2;myoLuc2	3	cavPor3;octDeg1;eptFus1	3	YES
EXOSC3	1.86159e-06	0.000389959	YES	5	38	1	myoLuc2	0	NA	1	NO
SP6	1.85276e-06	0.000389959	YES	5	38	0	NA	0	NA	0	NO
GPR180	1.91757e-06	0.00039541	YES	5	41	0	NA	0	NA	0	NO
HINT3	1.98909e-06	0.000397727	YES	4	34	0	NA	0	NA	0	NO
TRIML1	1.98072e-06	0.000397727	YES	6	33	0	NA	0	NA	0	NO
CCHCR1	2.11477e-06	0.000412406	YES	5	35	1	myoDav1	0	NA	1	NO
GNAI2	2.125e-06	0.000412406	YES	5	41	0	NA	0	NA	0	NO
CCDC106	2.23493e-06	0.000427454	YES	4	35	1	myoDav1	0	NA	1	NO
ANO5	2.31517e-06	0.000436476	YES	4	35	0	NA	0	NA	0	NO
GTPBP3	2.37712e-06	0.000441842	YES	5	37	0	NA	0	NA	0	NO
MGEA5	2.41379e-06	0.000442428	YES	6	33	0	NA	0	NA	0	NO
PRPF19	2.46674e-06	0.000445939	YES	5	42	0	NA	0	NA	0	NO
CLASRP	2.5402e-06	0.000448827	YES	4	31	0	NA	0	NA	0	NO
CNTN1	2.55108e-06	0.000448827	YES	5	36	0	NA	0	NA	0	NO
PRKD1	2.58474e-06	0.000448827	YES	4	34	0	NA	0	NA	0	NO
NSFL1C	2.75033e-06	0.000471379	YES	5	40	0	NA	0	NA	0	NO
ERLEC1	2.80678e-06	0.000474885	YES	5	37	0	NA	0	NA	0	NO
SLIT2	2.89934e-06	0.000484337	YES	5	35	0	NA	0	NA	0	NO
MFI2	3.15074e-06	0.000515534	YES	5	41	0	NA	0	NA	0	NO
SLC35G1	3.16422e-06	0.000515534	YES	5	41	0	NA	0	NA	0	NO
ERRFI1	3.25011e-06	0.000523069	YES	5	36	0	NA	0	NA	0	NO
GBA2	3.45244e-06	0.000542403	YES	5	40	0	NA	0	NA	0	NO
VIM	3.42026e-06	0.000542403	YES	5	35	0	NA	0	NA	0	NO
CDH9	3.71103e-06	0.00057617	YES	4	29	0	NA	0	NA	0	NO
DSC3	3.75872e-06	0.000576788	YES	5	38	1	myoLuc2	0	NA	1	NO
SAPCD1	4.00971e-06	0.000586203	YES	6	41	6	nanGal1;hetGla2;myoDav1;myoLuc2;conCri1;chrAsi1	1	eptFus1	5	YES
POFUT2	3.88983e-06	0.000586203	YES	5	36	1	myoLuc2	0	NA	1	NO
TMEM184C	3.96223e-06	0.000586203	YES	6	36	1	myoLuc2	0	NA	1	NO
APEH	4.04141e-06	0.000586203	YES	5	40	0	NA	0	NA	0	NO
PMVK	4.04216e-06	0.000586203	YES	5	40	0	NA	0	NA	0	NO
TTC39C	4.17847e-06	0.000593333	YES	5	38	1	myoDav1	0	NA	1	NO
NTRK3	4.18125e-06	0.000593333	YES	4	34	0	NA	0	NA	0	NO
ADAM12	4.24219e-06	0.000595576	YES	4	35	1	myoDav1	0	NA	1	NO
ENTHD2	4.2986e-06	0.000597144	YES	4	32	0	NA	0	NA	0	NO
PRSS36	4.36742e-06	0.000600383	YES	4	33	2	nanGal1;hetGla2	3	micOch1;mm10;rn6	2	NO
KIAA1279	4.57067e-06	0.000621847	YES	5	38	0	NA	0	NA	0	NO
MAST1	4.70978e-06	0.000634235	YES	4	27	0	NA	0	NA	0	NO
GRIFIN	4.99043e-06	0.000655309	YES	3	36	2	nanGal1;chrAsi1	1	eptFus1	2	NO
HOXB13	5.14563e-06	0.000655309	YES	5	39	0	NA	0	NA	0	NO
LMNB2	5.02931e-06	0.000655309	YES	4	28	0	NA	0	NA	0	NO
N4BP1	5.16422e-06	0.000655309	YES	5	39	0	NA	0	NA	0	NO
OCRL	5.09395e-06	0.000655309	YES	5	37	0	NA	0	NA	0	NO
SLC38A3	5.16422e-06	0.000655309	YES	5	39	0	NA	0	NA	0	NO
C19orf81	5.44883e-06	0.00067838	YES	3	33	0	NA	0	NA	0	NO
FAP	5.41018e-06	0.00067838	YES	5	37	0	NA	0	NA	0	NO
FOXJ2	5.64068e-06	0.000683529	YES	5	34	0	NA	0	NA	0	NO
HOXB6	5.64557e-06	0.000683529	YES	5	34	0	NA	0	NA	0	NO
PNMT	5.57125e-06	0.000683529	YES	5	34	0	NA	0	NA	0	NO
RAN	5.7363e-06	0.0006882	YES	5	33	0	NA	0	NA	0	NO
PTGES	6.08449e-06	0.000723397	YES	5	38	0	NA	0	NA	0	NO
UNC79	6.15179e-06	0.000724868	YES	5	29	0	NA	0	NA	0	NO
TRIT1	6.27926e-06	0.000733339	YES	5	41	0	NA	0	NA	0	NO
GAS2L2	6.34495e-06	0.000734512	YES	5	33	0	NA	0	NA	0	NO
ETFA	6.40123e-06	0.000734583	YES	5	38	0	NA	0	NA	0	NO
CRYGS	6.55623e-06	0.000737754	YES	6	41	3	nanGal1;conCri1;chrAsi1	0	NA	3	YES
KANK2	6.53335e-06	0.000737754	YES	5	32	2	nanGal1;hetGla2	0	NA	2	NO
NOS1	6.65248e-06	0.000737754	YES	5	31	1	myoLuc2	0	NA	1	NO
TBRG4	6.60185e-06	0.000737754	YES	5	38	0	NA	0	NA	0	NO
BMP2	7.0809e-06	0.000772286	YES	5	33	0	NA	0	NA	0	NO
HEY1	7.03735e-06	0.000772286	YES	5	40	0	NA	0	NA	0	NO
C10orf11	7.41853e-06	0.000797088	YES	5	33	0	NA	0	NA	0	NO
RIC8A	7.4291e-06	0.000797088	YES	5	38	0	NA	0	NA	0	NO
C3orf22	7.59115e-06	0.000807906	YES	5	36	3	nanGal1;myoDav1;myoLuc2	0	NA	2	NO
CRYBA1	7.67809e-06	0.000810622	YES	6	40	3	nanGal1;conCri1;chrAsi1	0	NA	3	YES
IL5RA	7.78806e-06	0.000815707	YES	4	40	0	NA	0	NA	0	NO
CDKL3	7.93632e-06	0.00082469	YES	5	40	0	NA	0	NA	0	NO
SLC16A8	8.41873e-06	0.000867984	YES	4	25	1	chrAsi1	0	NA	1	NO
SLC17A7	8.49634e-06	0.000869196	YES	5	37	0	NA	0	NA	0	NO
LCN12	8.62421e-06	0.00087549	YES	3	31	2	nanGal1;hetGla2	0	NA	2	NO
ADCY8	9.25864e-06	0.00093272	YES	4	27	0	NA	0	NA	0	NO
C7orf34	9.42886e-06	0.000938624	YES	5	37	4	nanGal1;myoDav1;myoLuc2;conCri1	3	speTri2;micOch1;cerSim1	3	YES
GNAT2	9.4595e-06	0.000938624	YES	6	41	2	hetGla2;chrAsi1	0	NA	2	NO
BCAS3	9.58785e-06	0.00094426	YES	5	32	0	NA	0	NA	0	NO
TRAPPC12	1.00298e-05	0.000980471	YES	3	32	1	myoDav1	0	NA	1	NO
NIPSNAP1	1.0163e-05	0.000985021	YES	5	38	1	myoDav1	0	NA	1	NO
CARD10	1.02256e-05	0.000985021	YES	5	35	0	NA	0	NA	0	NO
HSPB6	1.07686e-05	0.0010224	YES	5	36	0	NA	0	NA	0	NO
NLGN1	1.0763e-05	0.0010224	YES	5	36	0	NA	0	NA	0	NO
CCDC6	1.09931e-05	0.00103626	YES	4	27	0	NA	0	NA	0	NO
BCOR	1.16339e-05	0.00108889	YES	5	32	0	NA	0	NA	0	NO
MIP	1.31312e-05	0.00122037	YES	6	42	2	conCri1;chrAsi1	0	NA	2	NO
PVRL2	1.34224e-05	0.00123011	YES	5	35	0	NA	0	NA	0	NO
RASSF7	1.3377e-05	0.00123011	YES	5	35	0	NA	0	NA	0	NO
OVOL3	1.38834e-05	0.00126358	YES	6	41	2	myoDav1;myoLuc2	2	turTru2;orcOrc1	1	NO
IL11	1.44651e-05	0.00130751	YES	4	35	1	myoDav1	0	NA	1	NO
ALDH3B1	1.52332e-05	0.00136757	YES	4	30	0	NA	0	NA	0	NO
TMEM210	1.53687e-05	0.00137041	YES	3	37	1	hetGla2	0	NA	1	NO
FAM185A	1.60914e-05	0.00141853	YES	5	30	0	NA	0	NA	0	NO
ZFP36L1	1.61233e-05	0.00141853	YES	5	35	0	NA	0	NA	0	NO
IMPAD1	1.63338e-05	0.00142753	YES	4	24	0	NA	0	NA	0	NO
GCH1	1.70181e-05	0.00147755	YES	5	32	1	myoDav1	0	NA	1	NO
IGFBP6	1.76562e-05	0.00152293	YES	5	34	1	myoDav1	0	NA	1	NO
HMMR	1.77747e-05	0.0015232	YES	6	35	2	myoDav1;myoLuc2	0	NA	1	NO
IL2RB	1.7899e-05	0.00152396	YES	6	37	2	myoDav1;myoLuc2	0	NA	1	NO
UNC119	1.83597e-05	0.00155316	YES	4	29	0	NA	0	NA	0	NO
ZYG11A	1.94972e-05	0.00163888	YES	5	37	0	NA	0	NA	0	NO
INA	2.19873e-05	0.0018365	YES	5	29	0	NA	0	NA	0	NO
RTBDN	2.27737e-05	0.0018784	YES	6	40	2	conCri1;chrAsi1	0	NA	2	NO
EMX2	2.26336e-05	0.0018784	YES	5	29	0	NA	0	NA	0	NO
GJA10	2.40298e-05	0.00196009	YES	6	38	6	nanGal1;hetGla2;myoDav1;myoLuc2;conCri1;chrAsi1	2	lepWed1;eptFus1	5	YES
PAPPA	2.40611e-05	0.00196009	YES	5	31	0	NA	0	NA	0	NO
MMP15	2.61494e-05	0.00209922	YES	5	33	1	myoDav1	0	NA	1	NO
FCGRT	2.62107e-05	0.00209922	YES	5	34	0	NA	0	NA	0	NO
KCTD8	2.62462e-05	0.00209922	YES	5	28	0	NA	0	NA	0	NO
KRT12	2.7452e-05	0.00218243	YES	6	40	3	nanGal1;conCri1;chrAsi1	0	NA	3	YES
TEX40	2.85412e-05	0.0022227	YES	6	39	2	myoDav1;myoLuc2	0	NA	1	NO
SVEP1	2.88006e-05	0.0022227	YES	5	33	0	NA	0	NA	0	NO
TMC8	2.83506e-05	0.0022227	YES	3	32	0	NA	0	NA	0	NO
TMEM138	2.82438e-05	0.0022227	YES	6	42	0	NA	0	NA	0	NO
UBFD1	2.87533e-05	0.0022227	YES	5	29	0	NA	0	NA	0	NO
CRYBB3	2.99407e-05	0.00225787	YES	6	36	3	myoDav1;conCri1;chrAsi1	0	NA	3	YES
AZU1	2.98477e-05	0.00225787	YES	4	26	3	hetGla2;myoDav1;myoLuc2	3	musFur1;odoRosDiv1;lepWed1	2	NO
CD93	2.95265e-05	0.00225787	YES	5	41	1	myoLuc2	0	NA	1	NO
PDE5A	2.98589e-05	0.00225787	YES	3	36	0	NA	0	NA	0	NO
STOML1	3.01356e-05	0.00225966	YES	6	42	2	myoDav1;myoLuc2	0	NA	1	NO
TMEM102	3.0673e-05	0.00228696	YES	5	32	0	NA	0	NA	0	NO
ATM	3.13158e-05	0.00232177	YES	4	30	1	myoDav1	0	NA	1	NO
OPTC	3.1709e-05	0.00233778	YES	6	37	4	myoDav1;myoLuc2;conCri1;chrAsi1	3	eptFus1;loxAfr3;triMan1	3	YES
UTS2	3.21717e-05	0.00235872	YES	5	42	2	hetGla2;conCri1	0	NA	2	NO
COQ3	3.23597e-05	0.00235939	YES	6	38	0	NA	0	NA	0	NO
TTC38	3.26215e-05	0.00236541	YES	4	32	1	myoDav1	0	NA	1	NO
ZBTB41	3.3249e-05	0.00239775	YES	5	34	0	NA	0	NA	0	NO
UTS2R	3.39157e-05	0.00240836	YES	3	32	1	hetGla2	0	NA	1	NO
GPX1	3.37302e-05	0.00240836	YES	4	37	0	NA	0	NA	0	NO
TTLL12	3.39438e-05	0.00240836	YES	4	39	0	NA	0	NA	0	NO
RABL6	3.43279e-05	0.00242259	YES	4	35	1	myoDav1	0	NA	1	NO
MPP4	3.46374e-05	0.00243144	YES	6	36	2	nanGal1;hetGla2	0	NA	2	NO
SDR42E2	3.57228e-05	0.00249436	YES	5	34	0	NA	0	NA	0	NO
ITPR3	3.63804e-05	0.00252691	YES	4	32	1	myoDav1	0	NA	1	NO
NUCB1	3.79607e-05	0.00262287	YES	5	32	0	NA	0	NA	0	NO
PTPRG	3.83203e-05	0.00263392	YES	4	30	0	NA	0	NA	0	NO
GCSH	3.86649e-05	0.00264384	YES	4	26	0	NA	0	NA	0	NO
PKD1L2	3.89786e-05	0.00265155	YES	5	38	5	nanGal1;hetGla2;myoDav1;myoLuc2;chrAsi1	5	turTru2;orcOrc1;balAcu1;odoRosDiv1;eptFus1	4	YES
ZC3H8	4.13625e-05	0.00279705	YES	5	41	1	chrAsi1	0	NA	1	NO
KIF13A	4.16812e-05	0.00279705	YES	3	35	0	NA	0	NA	0	NO
SF3B1	4.17533e-05	0.00279705	YES	5	35	0	NA	0	NA	0	NO
BCAN	4.21838e-05	0.00281161	YES	5	34	0	NA	0	NA	0	NO
C7orf43	4.33188e-05	0.00287276	YES	5	31	0	NA	0	NA	0	NO
CKLF_CMTM1	4.50389e-05	0.00297189	YES	4	37	0	NA	0	NA	0	NO
C3orf62	4.5515e-05	0.00298836	YES	4	40	0	NA	0	NA	0	NO
SFMBT1	4.62542e-05	0.00302187	YES	5	37	0	NA	0	NA	0	NO
BFSP2	4.68953e-05	0.00304866	YES	6	34	3	nanGal1;conCri1;chrAsi1	0	NA	3	YES
MPHOSPH10	4.78881e-05	0.00309794	YES	6	38	2	myoDav1;myoLuc2	0	NA	1	NO
IGFBP7	4.81464e-05	0.00309945	YES	4	22	0	NA	0	NA	0	NO
SPTBN5	4.91672e-05	0.0031498	YES	6	33	5	nanGal1;hetGla2;myoDav1;myoLuc2;conCri1	6	rn6;camFer1;turTru2;orcOrc1;balAcu1;eptFus1	4	YES
ZNF672	4.9779e-05	0.00315834	YES	3	32	2	myoLuc2;conCri1	3	cavPor3;octDeg1;ochPri3	2	NO
RETN	4.96694e-05	0.00315834	YES	4	38	1	myoDav1	0	NA	1	NO
C11orf80	5.14279e-05	0.00324734	YES	5	29	1	hetGla2	0	NA	1	NO
NEFL	5.6175e-05	0.0035302	YES	5	36	0	NA	0	NA	0	NO
TEKT5	6.11622e-05	0.00381635	YES	6	36	2	nanGal1;hetGla2	0	NA	2	NO
GRAMD1C	6.13069e-05	0.00381635	YES	4	31	0	NA	0	NA	0	NO
IL22RA2	6.23832e-05	0.00386512	YES	6	41	0	NA	0	NA	0	NO
ADORA2B	6.38181e-05	0.00393555	YES	4	32	0	NA	0	NA	0	NO
U2AF2	6.45155e-05	0.00396005	YES	5	27	1	myoDav1	0	NA	1	NO
STX2	6.79219e-05	0.00414984	YES	4	38	0	NA	0	NA	0	NO
TEDDM1	6.91188e-05	0.00420351	YES	6	31	1	hetGla2	0	NA	1	NO
SLC9A4	7.16785e-05	0.00433918	YES	5	34	1	myoDav1	0	NA	1	NO
ERICH4	7.25253e-05	0.00437039	YES	5	35	0	NA	0	NA	0	NO
SCNN1A	7.33464e-05	0.00439979	YES	5	30	0	NA	0	NA	0	NO
SH2B3	7.40813e-05	0.00442376	YES	4	24	0	NA	0	NA	0	NO
RSPH4A	7.51614e-05	0.00446804	YES	5	40	0	NA	0	NA	0	NO
OVOL2	7.76878e-05	0.00459752	YES	5	29	0	NA	0	NA	0	NO
DFFB	8.01704e-05	0.00472325	YES	5	37	0	NA	0	NA	0	NO
UMOD	8.10403e-05	0.00475328	YES	6	36	2	myoDav1;myoLuc2	0	NA	1	NO
GLB1L3	8.31566e-05	0.00485583	YES	5	31	1	nanGal1	0	NA	1	NO
DKFZP686J19100	8.49013e-05	0.00489723	YES	6	40	5	nanGal1;hetGla2;myoDav1;myoLuc2;chrAsi1	3	turTru2;orcOrc1;eptFus1	4	YES
GUCY1B3	8.49788e-05	0.00489723	YES	6	38	0	NA	0	NA	0	NO
SIKE1	8.45366e-05	0.00489723	YES	5	39	0	NA	0	NA	0	NO
WFDC10A	8.9258e-05	0.00512147	YES	3	29	1	hetGla2	0	NA	1	NO
GSG1	8.97545e-05	0.00512767	YES	6	41	1	conCri1	0	NA	1	NO
IZUMO2	9.04623e-05	0.00514583	YES	5	38	1	hetGla2	0	NA	1	NO
TMEM190	9.30835e-05	0.0052722	YES	3	33	0	NA	0	NA	0	NO
CYTH2	0.000103277	0.00582455	YES	5	38	1	myoDav1	0	NA	1	NO
TREH	0.00010754	0.00601359	YES	4	38	2	hetGla2;myoLuc2	2	odoRosDiv1;lepWed1	2	NO
USP50	0.000107262	0.00601359	YES	6	38	2	nanGal1;hetGla2	2	calJac3;saiBol1	2	NO
CRYBB2	0.000108052	0.00601673	YES	5	35	1	chrAsi1	0	NA	1	NO
ZBTB32	0.000109996	0.00609925	YES	6	42	0	NA	0	NA	0	NO
STK35	0.000110772	0.00611654	YES	5	30	1	myoDav1	0	NA	1	NO
CABS1	0.000111313	0.00612082	YES	6	39	1	hetGla2	0	NA	1	NO
CRB1	0.000112264	0.00614748	YES	5	37	4	hetGla2;myoLuc2;conCri1;chrAsi1	1	eptFus1	4	YES
CRYGC	0.000113615	0.00619575	YES	5	36	1	nanGal1	0	NA	1	NO
DMRT1	0.000116615	0.00631038	YES	6	28	2	myoDav1;myoLuc2	0	NA	1	NO
C4orf17	0.000116673	0.00631038	YES	4	35	0	NA	0	NA	0	NO
HEATR5A	0.000117478	0.00632796	YES	5	29	1	nanGal1	0	NA	1	NO
ANGPTL6	0.000118608	0.00636289	YES	5	29	0	NA	0	NA	0	NO
GPA33	0.000121639	0.00647285	YES	5	34	1	conCri1	0	NA	1	NO
PHRF1	0.000121216	0.00647285	YES	5	33	1	myoLuc2	0	NA	1	NO
A4GALT	0.000127372	0.00672371	YES	5	37	1	myoDav1	0	NA	1	NO
ZNF648	0.000126994	0.00672371	YES	3	33	2	myoDav1;myoLuc2	2	cavPor3;octDeg1	1	NO
ROM1	0.000132101	0.00691798	YES	5	41	2	nanGal1;conCri1	0	NA	2	NO
CTD_2616J11.11	0.000131937	0.00691798	YES	4	37	1	hetGla2	0	NA	1	NO
TKTL2	0.000134083	0.00699405	YES	5	40	3	nanGal1;hetGla2;conCri1	2	turTru2;orcOrc1	3	YES
ZNF483	0.000137067	0.00712154	YES	5	41	2	hetGla2;chrAsi1	0	NA	2	NO
LRP2BP	0.000146733	0.00759386	YES	6	39	1	hetGla2	0	NA	1	NO
KCNT2	0.000158212	0.00815595	YES	3	29	1	myoDav1	0	NA	1	NO
CABP5	0.000159452	0.00818791	YES	4	40	1	conCri1	0	NA	1	NO
NT5C1B_RDH14	0.000160501	0.0082098	YES	6	40	1	hetGla2	3	cavPor3;turTru2;orcOrc1	1	NO
ATRIP	0.000167943	0.00855731	YES	6	39	0	NA	0	NA	0	NO
HUNK	0.000168868	0.00857136	YES	5	32	1	nanGal1	0	NA	1	NO
CPNE1	0.00017131	0.008662	YES	6	37	0	NA	0	NA	0	NO
TRIM38	0.00017285	0.00870652	YES	5	36	2	nanGal1;hetGla2	1	canFam3	2	NO
TIMM50	0.000176696	0.0088664	YES	6	41	0	NA	0	NA	0	NO
NQO2	0.000182612	0.00912855	YES	5	37	0	NA	0	NA	0	NO
BRAF	0.000183963	0.00916135	YES	5	37	0	NA	0	NA	0	NO
PPP1R12B	0.000190558	0.00945409	YES	5	35	1	myoDav1	0	NA	1	NO
LRIT2	0.00019363	0.00957056	YES	6	39	6	nanGal1;hetGla2;myoDav1;myoLuc2;conCri1;chrAsi1	4	cerSim1;eptFus1;loxAfr3;triMan1	5	YES
C12orf43	0.000199371	0.00981753	YES	5	40	0	NA	0	NA	0	NO
CYGB	0.000202134	0.0099045	YES	5	29	0	NA	0	NA	0	NO
RARRES2	0.000202638	0.0099045	YES	5	37	0	NA	0	NA	0	NO
GPR89B	0.000204773	0.00997191	YES	6	28	0	NA	0	NA	0	NO
IHH	0.000207647	0.0100747	YES	5	24	0	NA	0	NA	0	NO
GJE1	0.000228541	0.0110097	YES	6	41	4	nanGal1;hetGla2;conCri1;chrAsi1	3	rhiRox1;saiBol1;otoGar3	4	YES
GPRIN3	0.000229138	0.0110097	YES	5	38	2	hetGla2;myoLuc2	0	NA	2	NO
HSF2BP	0.000229421	0.0110097	YES	5	34	0	NA	0	NA	0	NO
H1FOO	0.000236135	0.0112909	YES	6	32	2	myoDav1;myoLuc2	1	micOch1	1	NO
GABRR2	0.000240748	0.0114699	YES	6	39	2	nanGal1;chrAsi1	0	NA	2	NO
STAP2	0.000243832	0.011575	YES	5	32	0	NA	0	NA	0	NO
SLC36A3	0.000249907	0.0118209	YES	4	40	3	nanGal1;hetGla2;chrAsi1	2	loxAfr3;triMan1	3	YES
C10orf90	0.000258695	0.0121286	YES	5	38	1	myoDav1	0	NA	1	NO
DHTKD1	0.000257681	0.0121286	YES	4	34	1	nanGal1	0	NA	1	NO
PDE8A	0.00025917	0.0121286	YES	3	34	0	NA	0	NA	0	NO
CXorf65	0.000268099	0.0125021	YES	6	39	1	nanGal1	0	NA	1	NO
RET	0.000284084	0.0132009	YES	5	37	0	NA	0	NA	0	NO
SYNE4	0.00029571	0.0136929	YES	6	41	2	conCri1;chrAsi1	2	bisBis1;loxAfr3	2	NO
EPOR	0.000304043	0.0140295	YES	5	36	0	NA	1	tarSyr2	0	NO
GRK7	0.000308444	0.0141187	YES	6	39	3	nanGal1;hetGla2;myoDav1	4	micOch1;perManBai1;mm10;rn6	3	YES
CEP70	0.000307776	0.0141187	YES	4	34	0	NA	0	NA	0	NO
RGS18	0.000309185	0.0141187	YES	6	36	0	NA	0	NA	0	NO
C6orf141	0.000326172	0.0148431	YES	4	31	1	myoDav1	0	NA	1	NO
TIRAP	0.000344343	0.0156162	YES	5	38	0	NA	0	NA	0	NO
SPAG4	0.000351052	0.0158658	YES	5	36	2	nanGal1;chrAsi1	0	NA	2	NO
PDCD2L	0.000370259	0.0166768	YES	5	38	0	NA	0	NA	0	NO
PXMP2	0.000374549	0.0168127	YES	5	23	0	NA	0	NA	0	NO
CFAP97	0.000387951	0.0173552	YES	5	42	0	NA	0	NA	0	NO
AGO2	0.000389792	0.0173786	YES	4	34	0	NA	0	NA	0	NO
CCDC114	0.000409348	0.0181891	YES	5	31	1	myoDav1	1	bosTau8	1	NO
SEBOX	0.000419951	0.0185976	YES	6	42	4	nanGal1;hetGla2;conCri1;chrAsi1	5	ponAbe2;calJac3;saiBol1;loxAfr3;triMan1	4	YES
CACNA2D4	0.000425158	0.0187027	YES	3	33	2	nanGal1;chrAsi1	6	turTru2;orcOrc1;balAcu1;panHod1;bosTau8;capHir1	2	NO
TSEN54	0.00042428	0.0187027	YES	6	36	1	myoLuc2	0	NA	1	NO
ALG6	0.000430458	0.0188104	YES	6	36	0	NA	0	NA	0	NO
HIST1H2BN	0.000430043	0.0188104	YES	4	35	0	NA	0	NA	0	NO
MATN2	0.000436432	0.0190086	YES	6	36	0	NA	0	NA	0	NO
ARAP2	0.000438299	0.0190271	YES	4	36	0	NA	0	NA	0	NO
TGDS	0.000443222	0.0191777	YES	4	40	0	NA	0	NA	0	NO
DPYD	0.000452074	0.0194968	YES	3	33	0	NA	0	NA	0	NO
RSAD2	0.000459124	0.0197364	YES	3	33	0	NA	0	NA	0	NO
AC004754.3	0.000478874	0.0205185	YES	5	35	0	NA	0	NA	0	NO
IQCE	0.0005285	0.0225716	YES	4	29	2	nanGal1;chrAsi1	2	tarSyr2;otoGar3	2	NO
NT5C1B	0.000533457	0.0227098	YES	6	41	1	hetGla2	2	turTru2;orcOrc1	1	NO
RPS17	0.000582314	0.02471	YES	4	39	1	myoDav1	0	NA	1	NO
PDZD9	0.000587996	0.0248711	YES	5	40	1	hetGla2	0	NA	1	NO
FAM71F1	0.000611444	0.0257803	YES	5	41	0	NA	0	NA	0	NO
AQP8	0.000640626	0.0269247	YES	4	40	0	NA	0	NA	0	NO
PRSS56	0.000648557	0.0271714	YES	6	34	3	nanGal1;conCri1;chrAsi1	0	NA	3	YES
WDR33	0.000651537	0.0272099	YES	5	41	0	NA	0	NA	0	NO
PPM1N	0.000668561	0.0278328	YES	4	32	3	nanGal1;myoLuc2;conCri1	1	camFer1	3	YES
ATP1A4	0.000675737	0.0280431	YES	6	36	2	nanGal1;hetGla2	2	orcOrc1;balAcu1	2	NO
AGRN	0.000680574	0.0281553	YES	4	29	1	myoDav1	0	NA	1	NO
MIPEP	0.000700439	0.0288865	YES	5	32	0	NA	0	NA	0	NO
RPN1	0.000737081	0.030303	YES	6	34	1	myoDav1	0	NA	1	NO
RASGRF1	0.000740576	0.0303521	YES	3	32	1	myoDav1	0	NA	1	NO
C1orf185	0.000743245	0.0303672	YES	5	39	1	hetGla2	0	NA	1	NO
DHX30	0.000767481	0.0312606	YES	4	37	0	NA	0	NA	0	NO
LCTL	0.000777725	0.0315804	YES	6	38	3	nanGal1;hetGla2;chrAsi1	1	vicPac2	3	YES
SIDT1	0.000781274	0.0316272	YES	3	37	1	myoLuc2	0	NA	1	NO
TMEM63A	0.000787373	0.0317766	YES	4	37	0	NA	0	NA	0	NO
PCNX	0.000792278	0.0318771	YES	5	33	0	NA	0	NA	0	NO
ACTBL2	0.000803046	0.0322121	YES	4	39	0	NA	1	orcOrc1	0	NO
TM6SF1	0.000841363	0.0336469	YES	4	38	1	myoLuc2	0	NA	1	NO
HMGB4	0.000843972	0.0336492	YES	6	41	0	NA	0	NA	0	NO
TPBG	0.00086064	0.0342105	YES	5	32	0	NA	0	NA	0	NO
KHDC1	0.000877138	0.034554	YES	5	34	3	nanGal1;hetGla2;chrAsi1	10	cavPor3;octDeg1;turTru2;orcOrc1;bosTau8;bisBis1;cerSim1;felCat8;canFam3;musFur1	3	YES
PHKA2	0.000874847	0.034554	YES	6	35	1	myoLuc2	0	NA	1	NO
ASAH2	0.000874968	0.034554	YES	4	35	0	NA	0	NA	0	NO
MED13L	0.000898453	0.0352883	YES	6	37	0	NA	0	NA	0	NO
MIXL1	0.000913341	0.0357667	YES	3	22	0	NA	0	NA	0	NO
RP11_477N12.3	0.000942252	0.0366811	YES	5	34	4	hetGla2;myoDav1;myoLuc2;conCri1	3	cavPor3;equCab2;cerSim1	3	YES
CCNE1	0.000940775	0.0366811	YES	4	37	0	NA	0	NA	0	NO
CGREF1	0.000951902	0.0369478	YES	6	38	0	NA	0	NA	0	NO
MMRN2	0.000975689	0.03776	YES	4	29	0	NA	0	NA	0	NO
RPS9	0.000989904	0.0381981	YES	6	37	1	myoDav1	0	NA	1	NO
ABHD15	0.00100873	0.0388112	YES	5	31	0	NA	0	NA	0	NO
AEBP1	0.00102038	0.0391452	YES	5	33	0	NA	0	NA	0	NO
CEBPZ	0.00102415	0.0391759	YES	6	38	1	hetGla2	0	NA	1	NO
ZFP30	0.00106525	0.0405134	YES	5	37	2	myoLuc2;chrAsi1	2	calJac3;saiBol1	2	NO
ISOC2	0.00106327	0.0405134	YES	4	37	1	nanGal1	0	NA	1	NO
ZMYM6	0.00107193	0.0405808	YES	5	36	1	chrAsi1	0	NA	1	NO
FGF2	0.00107317	0.0405808	YES	3	26	0	NA	0	NA	0	NO
IL16	0.00110226	0.0415614	YES	4	34	0	NA	0	NA	0	NO
TSR3	0.00110656	0.0416046	YES	3	36	0	NA	0	NA	0	NO
ARHGAP33	0.00111811	0.0419196	YES	6	29	0	NA	0	NA	0	NO
GOT1L1	0.00114556	0.0428272	YES	5	40	0	NA	0	NA	0	NO
PLSCR2	0.00116171	0.0432649	YES	3	34	1	hetGla2	1	bisBis1	1	NO
POLH	0.00116383	0.0432649	YES	6	37	1	nanGal1	0	NA	1	NO
AFMID	0.00118042	0.0437548	YES	4	34	0	NA	0	NA	0	NO
MTX1	0.00118695	0.0437548	YES	5	30	0	NA	0	NA	0	NO
VEGFC	0.00118684	0.0437548	YES	6	39	0	NA	0	NA	0	NO
RGR	0.00120573	0.0440356	YES	6	41	1	chrAsi1	0	NA	1	NO
ROS1	0.00120792	0.0440356	YES	5	34	1	hetGla2	0	NA	1	NO
SSC4D	0.00120652	0.0440356	YES	5	24	1	myoDav1	0	NA	1	NO
TCP11	0.00120724	0.0440356	YES	6	39	1	chrAsi1	0	NA	1	NO
ADAMTSL1	0.00125151	0.0454993	YES	6	34	2	hetGla2;myoDav1	1	rn6	2	NO
SLC10A3	0.00126059	0.0456913	YES	5	38	1	hetGla2	0	NA	1	NO
WNT6	0.00126372	0.0456913	YES	5	32	0	NA	0	NA	0	NO
GPBP1L1	0.00127437	0.0459504	YES	6	38	1	nanGal1	0	NA	1	NO
LRRIQ3	0.0012897	0.0463764	YES	5	37	1	hetGla2	0	NA	1	NO
ZNF546	0.00131907	0.0473038	YES	3	26	2	conCri1;chrAsi1	2	bosTau8;bisBis1	2	NO
FAM227A	0.00135264	0.0483762	YES	3	34	0	NA	1	rn6	0	NO
C19orf12	0.00137643	0.0490939	YES	5	38	0	NA	0	NA	0	NO
TAF10	0.00138629	0.0493122	YES	5	27	1	myoDav1	0	NA	1	NO
MTG2	0.00140482	0.049837	YES	5	42	0	NA	0	NA	0	NO
NOXRED1	0.00142113	0.0502805		6	42	1	hetGla2	0	NA	1
HES2	0.00142735	0.0503655		3	31	0	NA	0	NA	0
SEL1L2	0.00145035	0.0510408		4	32	1	hetGla2	0	NA	1
MTNR1B	0.00147953	0.0519291		4	36	3	nanGal1;hetGla2;chrAsi1	3	calJac3;orcOrc1;balAcu1	3
PDE3A	0.00150825	0.0527966		4	25	0	NA	0	NA	0
OTUD6A	0.00153076	0.053443		6	32	1	nanGal1	0	NA	1
UBE2O	0.00154165	0.0535692		4	36	2	nanGal1;myoLuc2	0	NA	2
HEATR9	0.00154249	0.0535692		6	35	1	nanGal1	0	NA	1
LKAAEAR1	0.00156374	0.0541647		3	25	1	nanGal1	0	NA	1
ARL1	0.00161793	0.0554592		6	42	0	NA	0	NA	0
HIGD1B	0.00161793	0.0554592		6	42	0	NA	0	NA	0
RAD51L3_RFFL	0.00161018	0.0554592		5	35	0	NA	0	NA	0
RNF133	0.00161793	0.0554592		6	42	0	NA	0	NA	0
AGBL3	0.00162305	0.0554906		5	35	1	nanGal1	2	orcOrc1;balAcu1	1
SMC4	0.00163819	0.0558636		5	37	1	nanGal1	0	NA	1
DUSP21	0.00167828	0.0570832		6	39	1	hetGla2	0	NA	1
C4orf33	0.00169422	0.0574772		4	38	1	nanGal1	0	NA	1
ZNF581	0.00172218	0.0582759		4	35	1	nanGal1	4	micOch1;perManBai1;mm10;rn6	1
SLC17A3	0.00174541	0.0589108		5	34	0	NA	3	turTru2;orcOrc1;balAcu1	0
RAB34	0.00175548	0.0590996		5	39	0	NA	0	NA	0
BTBD8	0.0017662	0.0591587		4	40	1	chrAsi1	0	NA	1
RP11_766F14.2	0.00176462	0.0591587		4	34	0	NA	0	NA	0
KIAA0141	0.00177132	0.05918		6	39	0	NA	0	NA	0
C6orf118	0.00179338	0.0596818		3	34	0	NA	0	NA	0
ENTPD3	0.00179991	0.0596818		5	37	0	NA	0	NA	0
GSTO2	0.00179633	0.0596818		6	41	0	NA	0	NA	0
IL18RAP	0.00180587	0.0597294		6	39	1	chrAsi1	0	NA	1
SUV39H2	0.00186012	0.0613702		5	40	0	NA	0	NA	0
RTFDC1	0.00190048	0.0623896		6	40	1	hetGla2	0	NA	1
TRPM1	0.00189753	0.0623896		4	34	1	myoDav1	0	NA	1
ARR3	0.00190828	0.0624901		5	40	5	nanGal1;hetGla2;myoDav1;conCri1;chrAsi1	5	micOch1;cavPor3;eptFus1;loxAfr3;triMan1	5
C19orf84	0.00194634	0.0635788		4	40	0	NA	0	NA	0
HIST1H1T	0.00196801	0.064128		5	42	1	hetGla2	0	NA	1
C3orf84	0.00197611	0.0642335		6	39	0	NA	0	NA	0
LEFTY1	0.00200169	0.0642734		3	25	2	myoLuc2;chrAsi1	1	musFur1	2
C7orf62	0.00199303	0.0642734		6	40	0	NA	0	NA	0
CDNF	0.00199496	0.0642734		6	40	0	NA	0	NA	0
CPVL	0.00200015	0.0642734		6	40	0	NA	0	NA	0
TNP1	0.00199303	0.0642734		6	40	0	NA	0	NA	0
GIMAP1	0.0020214	0.0647486		4	26	1	myoLuc2	1	panHod1	1
ZNF79	0.00205277	0.0653879		5	36	4	nanGal1;hetGla2;myoDav1;myoLuc2	6	speTri2;mm10;rn6;cavPor3;oryCun2;ochPri3	3
BFSP1	0.00206072	0.0653879		4	36	2	nanGal1;conCri1	0	NA	2
NXNL1	0.00206688	0.0653879		4	33	2	nanGal1;chrAsi1	1	odoRosDiv1	2
IP6K3	0.00207109	0.0653879		5	39	1	hetGla2	0	NA	1
RP11_192H23.4	0.00206367	0.0653879		6	42	1	nanGal1	0	NA	1
NME6	0.00204707	0.0653879		5	39	0	NA	0	NA	0
FAM71A	0.00208427	0.065647		4	39	1	chrAsi1	1	orcOrc1	1
C1orf101	0.00210734	0.0662158		4	31	0	NA	0	NA	0
PLAGL2	0.00211522	0.0663052		5	42	0	NA	0	NA	0
ZSCAN16	0.00212302	0.0663921		4	37	2	nanGal1;hetGla2	4	micOch1;perManBai1;cavPor3;pteAle1	2
SIGLECL1	0.00213313	0.0664353		5	38	2	hetGla2;conCri1	3	tarSyr2;cavPor3;octDeg1	2
EWSR1	0.00213659	0.0664353		5	39	0	NA	0	NA	0
KLHL33	0.0021395	0.0664353		6	39	0	NA	0	NA	0
C9orf24	0.00215402	0.0664623		5	37	1	nanGal1	0	NA	1
SCAF4	0.00214609	0.0664623		5	31	1	myoLuc2	0	NA	1
TEX2	0.00215784	0.0664623		5	39	1	hetGla2	0	NA	1
NUP93	0.00216051	0.0664623		6	39	0	NA	0	NA	0
C14orf79	0.00218019	0.0667799		5	34	2	myoDav1;conCri1	2	otoGar3;ochPri3	2
SHARPIN	0.00218096	0.0667799		5	35	0	NA	0	NA	0
SLC26A8	0.00220806	0.067453		5	38	0	NA	0	NA	0
BTBD18	0.00221326	0.0674558		6	39	0	NA	0	NA	0
C15orf40	0.00222032	0.067515		4	32	1	myoDav1	0	NA	1
LELP1	0.00223037	0.0676648		6	38	1	nanGal1	1	orcOrc1	1
H1F0	0.00224381	0.0679163		6	39	0	NA	0	NA	0
CNST	0.0022862	0.0690412		3	35	1	nanGal1	0	NA	1
TNFAIP3	0.00229415	0.0691231		6	39	1	hetGla2	0	NA	1
C7orf72	0.00231704	0.0694784		4	32	1	hetGla2	0	NA	1
ANKRD10	0.0023428	0.0694784		5	34	0	NA	0	NA	0
ARV1	0.00233474	0.0694784		6	41	0	NA	0	NA	0
C12orf50	0.00234238	0.0694784		6	38	0	NA	0	NA	0
EGFR	0.0023417	0.0694784		4	33	0	NA	0	NA	0
IZUMO3	0.00234199	0.0694784		4	36	0	NA	0	NA	0
PLAC8L1	0.00232404	0.0694784		6	39	0	NA	0	NA	0
RASSF6	0.00235021	0.0695419		6	38	1	hetGla2	0	NA	1
CXCR1	0.00235563	0.0695465		5	37	1	myoLuc2	0	NA	1
LGR4	0.00237257	0.0698903		6	38	1	hetGla2	0	NA	1
RLBP1	0.0023819	0.0700089		5	37	1	myoDav1	0	NA	1
C2orf61	0.00240572	0.0703953		6	39	1	hetGla2	0	NA	1
C16orf54	0.00240529	0.0703953		6	39	0	NA	0	NA	0
IQCA1P1	0.0024145	0.070496		4	38	1	hetGla2	3	turTru2;orcOrc1;balAcu1	1
NMUR1	0.00242538	0.0706574		6	39	1	hetGla2	0	NA	1
ITGB3BP	0.00244131	0.0709648		6	38	0	NA	0	NA	0
HMGCLL1	0.00245932	0.0712778		6	38	0	NA	0	NA	0
PKD2L2	0.00246288	0.0712778		6	38	0	NA	0	NA	0
CNGB1	0.00255539	0.0734162		4	36	1	myoDav1	0	NA	1
PCDHGA11	0.00254407	0.0734162		6	35	1	hetGla2	0	NA	1
GRB10	0.00256457	0.0734162		5	35	0	NA	0	NA	0
SLC35C2	0.00256459	0.0734162		6	38	0	NA	0	NA	0
WNT7B	0.00256252	0.0734162		4	29	0	NA	0	NA	0
CYB5D2	0.00257513	0.0735585		5	33	0	NA	0	NA	0
ZNF34	0.00259624	0.0738418		5	27	1	nanGal1	1	mm10	1
ALDH3A2	0.00259148	0.0738418		5	40	0	NA	0	NA	0
DHRS7	0.00261792	0.0742984		5	40	0	NA	0	NA	0
RCN2	0.00264787	0.0749869		5	38	0	NA	0	NA	0
SLC39A2	0.00265847	0.0751259		6	38	0	NA	0	NA	0
CAPN11	0.00270278	0.076215		6	37	1	hetGla2	1	canFam3	1
SERPIND1	0.00273093	0.0768445		6	37	0	NA	0	NA	0
WNT8B	0.00274094	0.0769621		6	37	0	NA	0	NA	0
ZP3	0.00278679	0.0777532		6	39	1	chrAsi1	0	NA	1
KLRC4_KLRK1	0.00278416	0.0777532		4	35	0	NA	0	NA	0
KLRK1	0.00278416	0.0777532		4	35	0	NA	0	NA	0
SLC5A11	0.00283306	0.0788774		5	36	0	NA	0	NA	0
CGN	0.00291404	0.0809613		6	37	1	hetGla2	0	NA	1
NOL7	0.00292477	0.0810887		5	36	0	NA	0	NA	0
C1orf105	0.0029543	0.0815645		6	38	2	nanGal1;hetGla2	3	turTru2;orcOrc1;balAcu1	2
AGBL2	0.00294947	0.0815645		6	35	0	NA	0	NA	0
CRCP	0.00296468	0.0816802		6	35	0	NA	0	NA	0
CCDC185	0.00298338	0.0817106		4	33	3	nanGal1;hetGla2;conCri1	2	cavPor3;octDeg1	3
PARP15	0.00298872	0.0817106		4	30	3	nanGal1;hetGla2;myoLuc2	10	speTri2;micOch1;perManBai1;mm10;rn6;octDeg1;oryCun2;ochPri3;vicPac2;camFer1	3
ZBTB47	0.00299055	0.0817106		6	29	1	myoLuc2	2	bosTau8;felCat8	1
FAM198A	0.00297716	0.0817106		6	37	0	NA	0	NA	0
AHDC1	0.00300054	0.0818142		4	28	0	NA	1	vicPac2	0
GFPT2	0.00304714	0.0829137		6	36	1	hetGla2	0	NA	1
KCNK2	0.003073	0.0834453		6	36	0	NA	0	NA	0
IGIP	0.00308242	0.083529		6	42	0	NA	0	NA	0
PRMT2	0.00309146	0.0836024		5	38	1	hetGla2	0	NA	1
ARHGEF12	0.00309879	0.0836294		5	32	1	hetGla2	0	NA	1
DPYS	0.0031153	0.0837325		5	38	1	myoLuc2	0	NA	1
DLG1	0.00311001	0.0837325		6	33	0	NA	0	NA	0
GUCY2F	0.00313296	0.0838736		6	37	5	nanGal1;hetGla2;myoDav1;myoLuc2;chrAsi1	4	speTri2;musFur1;eptFus1;triMan1	4
LETM2	0.00313403	0.0838736		6	38	2	nanGal1;hetGla2	0	NA	2
RARRES3	0.0031586	0.0838736		3	22	2	nanGal1;chrAsi1	0	NA	2
ATP1B1	0.00315067	0.0838736		6	40	1	hetGla2	0	NA	1
C11orf65	0.00314083	0.0838736		5	38	1	hetGla2	0	NA	1
INTS4	0.00315869	0.0838736		5	33	1	myoLuc2	0	NA	1
2001-09-01	0.00317411	0.0841138		6	38	1	hetGla2	0	NA	1
ARHGAP26	0.00318475	0.0842268		4	32	0	NA	0	NA	0
TPRKB	0.00334054	0.0881702		6	36	1	hetGla2	0	NA	1
SYCP3	0.00340779	0.0897658		5	39	0	NA	0	NA	0
B3GAT2	0.00343598	0.0903279		5	29	0	NA	0	NA	0
RNF112	0.00346638	0.090946		4	27	0	NA	0	NA	0
PRSS54	0.00353785	0.0926368		6	40	1	hetGla2	0	NA	1
FAM132B	0.00359283	0.0938903		4	24	1	hetGla2	0	NA	1
NPC1L1	0.0036024	0.0939542		5	31	0	NA	1	cerSim1	0
GSTM4	0.00362447	0.0941577		4	30	2	hetGla2;conCri1	0	NA	2
PRKAG3	0.00361775	0.0941577		6	39	0	NA	0	NA	0
IMPG1	0.00364839	0.0945426		6	39	4	nanGal1;hetGla2;conCri1;chrAsi1	7	otoGar3;cavPor3;vicPac2;turTru2;orcOrc1;panHod1;capHir1	4
REXO1	0.00365361	0.0945426		6	31	1	hetGla2	3	panTro4;panPan1;octDeg1	1
LGR5	0.00369403	0.0954015		5	36	0	NA	0	NA	0
BTBD7	0.00370569	0.0955156		4	35	1	hetGla2	0	NA	1
WDR88	0.00372094	0.0957218		5	32	1	myoLuc2	0	NA	1
LIMD1	0.00373632	0.0959304		5	35	1	hetGla2	0	NA	1
PHGR1	0.00376159	0.0963917		6	37	4	myoDav1;myoLuc2;conCri1;chrAsi1	3	orcOrc1;balAcu1;eptFus1	3
TOR4A	0.00377728	0.0966062		3	26	0	NA	0	NA	0
ANKRD33	0.00381103	0.0972807		6	35	3	nanGal1;myoDav1;chrAsi1	0	NA	3
CDK4	0.00383772	0.097773		6	41	0	NA	0	NA	0
DYX1C1	0.00386034	0.0979709		5	33	1	nanGal1	0	NA	1
FAM98C	0.00385337	0.0979709		5	27	0	NA	0	NA	0
PLEKHS1	0.00389629	0.0986231		6	42	1	conCri1	0	NA	1
QPCTL	0.00390098	0.0986231		6	39	1	chrAsi1	0	NA	1
ZFP69	0.00392575	0.0990595		6	39	1	chrAsi1	0	NA	1
EPPIN_WFDC6	0.00395356	0.0994074		6	40	3	nanGal1;hetGla2;conCri1	1	canFam3	3
HIST2H3D	0.0039546	0.0994074		5	38	1	myoDav1	0	NA	1
CLHC1	0.00396349	0.0994414		6	34	0	NA	0	NA	0
SPATA32	0.00400181	0.100212		6	39	2	nanGal1;hetGla2	1	oryCun2	2
MIOX	0.00407562	0.101867		5	33	0	NA	0	NA	0
DOCK9	0.00410131	0.102138		5	35	0	NA	0	NA	0
GABRD	0.00410365	0.102138		4	34	0	NA	0	NA	0
SPG11	0.00410968	0.102138		5	30	0	NA	0	NA	0
TRMT1L	0.00414481	0.10279		5	36	1	nanGal1	0	NA	1
KCNAB2	0.00415147	0.10279		4	32	0	NA	0	NA	0
EPSTI1	0.00420867	0.104011		5	37	1	nanGal1	0	NA	1
KIF16B	0.00424858	0.104801		5	33	0	NA	1	panHod1	0
DZANK1	0.00429684	0.105794		6	36	0	NA	1	bosTau8	0
BLNK	0.00430962	0.105911		5	35	0	NA	0	NA	0
IL36A	0.00433717	0.10639		5	34	2	myoDav1;chrAsi1	2	saiBol1;turTru2	2
COX18	0.00442206	0.10817		5	39	1	hetGla2	0	NA	1
PALLD	0.00442615	0.10817		5	32	1	hetGla2	0	NA	1
LBHD1	0.00444442	0.108416		6	40	6	nanGal1;hetGla2;myoDav1;myoLuc2;conCri1;chrAsi1	10	rheMac3;macFas5;papAnu2;chlSab2;rhiRox1;speTri2;micOch1;cavPor3;octDeg1;eptFus1	5
CLEC2B	0.00445352	0.108437		5	32	3	hetGla2;conCri1;chrAsi1	1	octDeg1	3
RNF135	0.00448772	0.108868		4	27	2	hetGla2;conCri1	3	turTru2;balAcu1;felCat8	2
SYCE1L	0.00448156	0.108868		5	33	1	hetGla2	0	NA	1
ACRBP	0.00454601	0.11008		6	38	0	NA	0	NA	0
LIG1	0.00456405	0.110315		5	37	1	myoDav1	0	NA	1
LAYN	0.00458424	0.1106		6	39	1	chrAsi1	0	NA	1
CH17_140K24.8	0.00463309	0.111371		6	39	3	nanGal1;myoLuc2;chrAsi1	3	equCab2;cerSim1;triMan1	3
ARPC4_TTLL3	0.00462563	0.111371		6	37	0	NA	0	NA	0
PPP1R18	0.00468022	0.1123		5	30	0	NA	0	NA	0
ABCB5	0.00471608	0.112955		5	33	2	nanGal1;hetGla2	3	micOch1;orcOrc1;balAcu1	2
LRRC14	0.00481872	0.115204		5	41	1	chrAsi1	0	NA	1
C7orf61	0.00484751	0.115545		5	39	1	hetGla2	1	octDeg1	1
SYMPK	0.00485924	0.115545		4	37	1	myoDav1	0	NA	1
SLC30A10	0.00485168	0.115545		4	23	0	NA	0	NA	0
NRXN2	0.00499469	0.118384		5	32	1	myoDav1	0	NA	1
SEMA3B	0.00499656	0.118384		5	37	1	myoDav1	0	NA	1
SCD	0.0050177	0.118671		6	39	1	hetGla2	0	NA	1
TMEM44	0.00508246	0.119988		5	37	0	NA	0	NA	0
CALR3	0.00510154	0.120009		6	31	1	hetGla2	0	NA	1
DXO	0.00509547	0.120009		5	42	1	nanGal1	0	NA	1
TRIM44	0.00512519	0.120074		4	27	1	conCri1	0	NA	1
ASB12	0.00514072	0.120074		6	40	0	NA	0	NA	0
PFKFB2	0.00513077	0.120074		5	41	0	NA	0	NA	0
SMCO1	0.00513736	0.120074		6	41	0	NA	0	NA	0
EYS	0.00517701	0.120496		4	28	4	hetGla2;myoLuc2;conCri1;chrAsi1	10	ponAbe2;micOch1;mm10;rn6;octDeg1;oryCun2;bosTau8;capHir1;musFur1;eptFus1	4
FHDC1	0.00516983	0.120496		5	33	0	NA	0	NA	0
LENEP	0.00519598	0.120724		5	40	0	NA	0	NA	0
CKB	0.00525801	0.121951		5	30	0	NA	0	NA	0
CHST1	0.00530518	0.122614		5	35	1	myoDav1	1	panHod1	1
C1D	0.00530357	0.122614		6	40	0	NA	0	NA	0
CREG2	0.00537744	0.124067		5	24	1	myoDav1	1	rhiRox1	1
BLK	0.00539584	0.124274		4	36	0	NA	0	NA	0
AS3MT	0.00544814	0.124992		6	38	4	hetGla2;myoDav1;myoLuc2;chrAsi1	5	calJac3;tarSyr2;cavPor3;orcOrc1;pteAle1	3
CCDC54	0.00545544	0.124992		5	40	2	nanGal1;hetGla2	3	orcOrc1;balAcu1;felCat8	2
SIVA1	0.00545413	0.124992		4	32	0	NA	0	NA	0
CES1	0.00546668	0.125033		5	27	2	nanGal1;hetGla2	1	orcOrc1	2
C2CD2	0.00551112	0.125831		4	36	1	nanGal1	0	NA	1
PLA2G12A	0.00552428	0.125913		4	34	0	NA	0	NA	0
TPD52L3	0.00560185	0.126711		6	38	4	nanGal1;hetGla2;conCri1;chrAsi1	4	calJac3;saiBol1;cavPor3;octDeg1	4
CCT6B	0.00558198	0.126711		5	35	2	nanGal1;hetGla2	2	calJac3;balAcu1	2
TACR3	0.00560728	0.126711		4	34	1	nanGal1	0	NA	1
TUBB1	0.00559829	0.126711		5	40	0	NA	0	NA	0
TYMS	0.00559974	0.126711		4	33	0	NA	0	NA	0
FAAH	0.00562869	0.126856		6	37	1	myoLuc2	0	NA	1
GCSAM	0.00564255	0.126856		6	40	0	NA	0	NA	0
RCAN3	0.00564116	0.126856		5	39	0	NA	0	NA	0
IDO1	0.00566646	0.127177		5	39	1	chrAsi1	0	NA	1
ZNF304	0.00573041	0.12826		5	40	2	nanGal1;hetGla2	5	speTri2;mm10;rn6;cavPor3;balAcu1	2
GTSF1L	0.00573415	0.12826		4	40	1	nanGal1	1	calJac3	1
ARMC12	0.00582067	0.129975		4	37	0	NA	0	NA	0
RIPPLY2	0.00585227	0.130021		5	30	1	nanGal1	0	NA	1
TAP2	0.0058468	0.130021		4	25	1	nanGal1	0	NA	1
FAM118B	0.00584053	0.130021		6	36	0	NA	0	NA	0
PPEF1	0.00587286	0.130259		6	31	0	NA	0	NA	0
DCP1B	0.00595155	0.131783		6	33	1	chrAsi1	0	NA	1
CLNS1A	0.00602444	0.133173		6	39	0	NA	0	NA	0
TNFRSF9	0.00603917	0.133276		6	39	1	conCri1	0	NA	1
GRK4	0.00610019	0.134398		5	35	1	hetGla2	1	orcOrc1	1
TEX11	0.0061349	0.134713		3	29	2	hetGla2;chrAsi1	2	cavPor3;loxAfr3	2
DHX37	0.00612576	0.134713		5	35	1	myoDav1	0	NA	1
BPIFC	0.00622447	0.136397		6	39	0	NA	0	NA	0
GORAB	0.00623227	0.136397		6	38	0	NA	0	NA	0
DDIT4L	0.0062444	0.136412		5	41	1	hetGla2	0	NA	1
TBXA2R	0.00625362	0.136412		5	34	0	NA	0	NA	0
GAL	0.00626571	0.13645		4	31	0	NA	0	NA	0
CCL1	0.00628034	0.136477		6	40	2	myoDav1;myoLuc2	1	eptFus1	1
WASF1	0.00628764	0.136477		5	38	0	NA	0	NA	0
SNRPN	0.00630951	0.136727		5	39	1	chrAsi1	0	NA	1
CLTCL1	0.00633601	0.136852		4	31	3	nanGal1;hetGla2;chrAsi1	7	otoGar3;perManBai1;rn6;vicPac2;equCab2;cerSim1;loxAfr3	3
PYY	0.00633242	0.136852		5	34	1	myoLuc2	0	NA	1
DEFB119	0.00635095	0.13695		5	40	0	NA	0	NA	0
RDH8	0.00639267	0.137625		6	37	0	NA	0	NA	0
CENPBD1	0.00647305	0.13912		4	38	3	nanGal1;myoLuc2;conCri1	8	speTri2;micOch1;perManBai1;mm10;cavPor3;octDeg1;oryCun2;pteVam1	3
FRMPD3	0.00648319	0.13912		6	32	0	NA	2	rn6;loxAfr3	0
PLA2R1	0.00650206	0.139298		5	38	0	NA	0	NA	0
GJA9	0.00654162	0.13948		6	41	6	nanGal1;hetGla2;myoDav1;myoLuc2;conCri1;chrAsi1	9	papAnu2;perManBai1;mm10;rn6;cavPor3;octDeg1;ochPri3;lepWed1;eptFus1	5
RP11_244H3.4	0.00653444	0.13948		5	37	2	myoDav1;chrAsi1	0	NA	2
KIAA1217	0.00654226	0.13948		4	35	0	NA	0	NA	0
KIF21B	0.00666383	0.141843		5	29	1	myoDav1	0	NA	1
RP11_795F19.5	0.00669737	0.142327		4	30	0	NA	0	NA	0
IRGC	0.0067852	0.14335		5	34	1	hetGla2	2	turTru2;orcOrc1	1
EFHB	0.00678896	0.14335		5	30	0	NA	0	NA	0
PHF21B	0.00676185	0.14335		4	31	0	NA	0	NA	0
PSMA8	0.00677025	0.14335		5	39	0	NA	0	NA	0
RTL1	0.00681118	0.14359		4	29	1	hetGla2	1	ochPri3	1
PCED1A	0.00684584	0.14407		6	42	1	chrAsi1	0	NA	1
MTMR7	0.00685579	0.14407		6	36	0	NA	0	NA	0
ARSJ	0.00689758	0.144718		4	36	0	NA	0	NA	0
LGSN	0.00699584	0.146546		6	34	3	nanGal1;conCri1;chrAsi1	1	papAnu2	3
PPP1R32	0.00709131	0.148311		4	37	1	hetGla2	1	cavPor3	1
PPP4R1	0.00721301	0.150573		5	36	1	nanGal1	0	NA	1
TXNL4A	0.00722228	0.150573		5	37	0	NA	0	NA	0
RIMBP3B	0.0072561	0.151039		5	28	0	NA	0	NA	0
SNRPD2	0.0072917	0.151303		6	42	1	chrAsi1	0	NA	1
FSBP	0.00728457	0.151303		6	41	0	NA	0	NA	0
CH25H	0.00731536	0.151555		6	39	1	nanGal1	0	NA	1
ATP6V1E2	0.00735246	0.152085		6	42	0	NA	0	NA	0
WDR62	0.0074317	0.153484		6	37	0	NA	0	NA	0
SEC61A2	0.00749012	0.154449		6	41	0	NA	0	NA	0
HACL1	0.00750315	0.154476		6	37	1	hetGla2	0	NA	1
GPKOW	0.00757881	0.155791		4	34	0	NA	0	NA	0
GPHB5	0.00766074	0.156508		6	41	1	nanGal1	0	NA	1
APITD1	0.00766115	0.156508		6	41	0	NA	0	NA	0
MUSTN1	0.00765623	0.156508		6	41	0	NA	0	NA	0
TMEM98	0.00765493	0.156508		6	41	0	NA	0	NA	0
KLHL23	0.00771638	0.157393		6	41	0	NA	0	NA	0
WDR5B	0.00779354	0.158721		6	41	0	NA	0	NA	0
ENTPD2	0.00785342	0.159694		4	33	0	NA	1	orcOrc1	0
C6orf211	0.00789361	0.160265		6	41	0	NA	0	NA	0
BAG1	0.00793163	0.160789		5	25	0	NA	0	NA	0
ITFG3	0.00794972	0.160909		5	35	1	chrAsi1	0	NA	1
TMEM18	0.0079634	0.160939		5	36	1	nanGal1	0	NA	1
GGPS1	0.00799847	0.161154		6	41	0	NA	0	NA	0
ZNF629	0.00799497	0.161154		4	36	0	NA	0	NA	0
C1orf177	0.00805526	0.161804		6	42	2	nanGal1;hetGla2	2	turTru2;balAcu1	2
GABRR1	0.0080498	0.161804		6	41	1	chrAsi1	0	NA	1
MON2	0.00817241	0.163908		6	35	0	NA	0	NA	0
FTHL17	0.00821346	0.16412		6	30	1	nanGal1	1	oryCun2	1
SCP2D1	0.00827006	0.16412		6	42	1	conCri1	0	NA	1
FAM154A	0.00825351	0.16412		6	40	0	NA	0	NA	0
GNA14	0.00825348	0.16412		6	40	0	NA	0	NA	0
SMIM5	0.00825819	0.16412		6	40	0	NA	0	NA	0
UBE2K	0.00825348	0.16412		6	40	0	NA	0	NA	0
WDR77	0.00825344	0.16412		6	40	0	NA	0	NA	0
DDX58	0.00828858	0.164241		6	36	2	conCri1;chrAsi1	3	turTru2;orcOrc1;balAcu1	2
SAMD7	0.00836139	0.165435		6	39	1	chrAsi1	0	NA	1
GCA	0.00846383	0.166303		6	40	1	chrAsi1	0	NA	1
INSL6	0.00842265	0.166303		5	39	1	hetGla2	0	NA	1
LEKR1	0.00844818	0.166303		6	37	1	hetGla2	0	NA	1
FIGLA	0.00846827	0.166303		6	35	0	NA	0	NA	0
SCARB2	0.00845848	0.166303		4	35	0	NA	0	NA	0
DRG1	0.00853284	0.166827		6	39	0	NA	0	NA	0
RAB14	0.00851181	0.166827		6	40	0	NA	0	NA	0
SERTAD4	0.00852075	0.166827		5	40	0	NA	0	NA	0
MAP4K2	0.00863048	0.168486		4	30	0	NA	0	NA	0
PDXK	0.00866097	0.168831		5	35	1	nanGal1	0	NA	1
LRRC63	0.00867846	0.168923		5	36	1	hetGla2	1	equCab2	1
DECR1	0.00871348	0.169106		6	39	1	nanGal1	0	NA	1
IPCEF1	0.00871141	0.169106		4	40	0	NA	0	NA	0
GABRR3	0.00879037	0.169148		5	36	5	nanGal1;hetGla2;myoDav1;myoLuc2;conCri1	5	orcOrc1;cerSim1;canFam3;lepWed1;eptFus1	4
TUBB	0.00877944	0.169148		5	38	1	nanGal1	0	NA	1
ZNF211	0.0087463	0.169148		3	33	1	myoDav1	5	turTru2;orcOrc1;balAcu1;pteVam1;eptFus1	1
C7orf25	0.00874963	0.169148		6	40	0	NA	0	NA	0
PTK2	0.00879254	0.169148		4	34	0	NA	0	NA	0
RP3_468K18.7	0.00878621	0.169148		6	39	0	NA	0	NA	0
IZUMO1R	0.0088061	0.169162		5	34	0	NA	0	NA	0
ATP6V1F	0.00889646	0.170649		6	39	0	NA	0	NA	0
RABL3	0.0089238	0.170777		6	39	0	NA	0	NA	0
TEX101	0.00892901	0.170777		5	39	0	NA	0	NA	0
CCDC137	0.00896217	0.171004		4	37	0	NA	0	NA	0
CWC25	0.00896678	0.171004		6	39	0	NA	0	NA	0
UNC13D	0.00900825	0.171547		4	38	1	myoDav1	1	capHir1	1
SF3B4	0.00904844	0.172064		5	38	1	chrAsi1	0	NA	1
CKLF	0.00907625	0.172344		5	40	0	NA	0	NA	0
DRAM2	0.00909402	0.172434		6	39	0	NA	0	NA	0
N4BP3	0.00914719	0.173193		5	38	0	NA	0	NA	0
BCL2L10	0.00917682	0.173505		5	34	1	myoLuc2	4	turTru2;orcOrc1;canFam3;loxAfr3	1
PCSK4	0.0091939	0.173579		6	29	1	hetGla2	1	panPan1	1
RGS11	0.00920714	0.173581		5	32	3	nanGal1;hetGla2;chrAsi1	5	micOch1;perManBai1;mm10;cavPor3;loxAfr3	3
PEX11G	0.00923747	0.173904		6	39	0	NA	0	NA	0
CBX8	0.00926149	0.174108		5	37	1	chrAsi1	0	NA	1
PROX2	0.00935191	0.175558		6	40	1	myoLuc2	0	NA	1
CYP51A1	0.00936697	0.175591		6	39	0	NA	0	NA	0
CBY3	0.00940225	0.175978		4	31	0	NA	0	NA	0
PDE7A	0.00941429	0.175978		5	37	0	NA	0	NA	0
GGCX	0.00944635	0.176259		5	41	1	myoLuc2	0	NA	1
CNGA1	0.00945605	0.176259		6	38	0	NA	0	NA	0
TEX13B	0.00951366	0.176741		5	34	2	myoDav1;conCri1	10	rhiRox1;mm10;rn6;ochPri3;vicPac2;camFer1;turTru2;orcOrc1;equCab2;cerSim1	2
ZNF613	0.00957565	0.176741		3	35	2	nanGal1;chrAsi1	2	mm10;cavPor3	2
ADAM32	0.00956601	0.176741		4	29	1	hetGla2	0	NA	1
GOLGA5	0.00955883	0.176741		6	39	0	NA	0	NA	0
RPS19	0.00954924	0.176741		6	39	0	NA	0	NA	0
ZFAND3	0.00952544	0.176741		5	39	0	NA	0	NA	0
ZNF248	0.00951517	0.176741		5	33	0	NA	0	NA	0
TMEM45A	0.00966807	0.177949		6	38	1	nanGal1	0	NA	1
TMEM116	0.00966205	0.177949		6	38	0	NA	0	NA	0
DIO2	0.00969277	0.178155		6	36	0	NA	0	NA	0
NLN	0.00973319	0.178649		6	38	1	nanGal1	0	NA	1
FAM71D	0.00974777	0.178668		6	41	1	hetGla2	0	NA	1
MROH9	0.00976383	0.178715		5	32	0	NA	0	NA	0
C1orf27	0.00981112	0.179083		6	37	0	NA	0	NA	0
KIAA1143	0.00979769	0.179083		5	37	0	NA	0	NA	0
AMD1	0.00982837	0.179151		6	38	0	NA	0	NA	0
IFNB1	0.00989506	0.180117		6	41	0	NA	0	NA	0
ATP10A	0.00993475	0.180154		5	28	1	myoDav1	0	NA	1
FAM208B	0.00993801	0.180154		5	36	2	myoDav1;myoLuc2	1	eptFus1	1
TEX43	0.0099216	0.180154		5	38	1	nanGal1	0	NA	1
INSR	0.00997747	0.180621		5	33	0	NA	0	NA	0
FAM193B	0.0100002	0.180784		6	37	0	NA	0	NA	0
C10orf10	0.0100636	0.181241		5	41	1	chrAsi1	0	NA	1
NLRC3	0.0100667	0.181241		5	31	1	hetGla2	0	NA	1
AKAP7	0.0100554	0.181241		5	37	0	NA	0	NA	0
CYP19A1	0.010159	0.182654		5	40	0	NA	0	NA	0
RTN2	0.0101896	0.182754		5	41	1	hetGla2	0	NA	1
TNFSF11	0.0101922	0.182754		6	38	0	NA	0	NA	0
ALPK1	0.0102646	0.183304		4	34	0	NA	0	NA	0
CRYZ	0.010264	0.183304		6	38	0	NA	0	NA	0
SASS6	0.0102382	0.183304		6	37	0	NA	0	NA	0
ASB15	0.0103133	0.183921		5	38	1	conCri1	0	NA	1
TRIM17	0.010327	0.183921		4	34	1	nanGal1	3	otoGar3;turTru2;orcOrc1	1
EXOSC8	0.0104035	0.184312		6	40	0	NA	0	NA	0
LRRC9	0.0104019	0.184312		6	37	0	NA	0	NA	0
PRKAA2	0.010388	0.184312		6	40	0	NA	0	NA	0
SLC37A1	0.0104048	0.184312		5	35	0	NA	0	NA	0
MLF1	0.0104445	0.184767		6	41	1	chrAsi1	0	NA	1
ATP13A4	0.010522	0.185889		5	35	0	NA	0	NA	0
STX10	0.0106281	0.187512		5	39	2	hetGla2;conCri1	6	micOch1;perManBai1;mm10;rn6;cavPor3;octDeg1	2
ADM5	0.010659	0.187555		6	38	6	nanGal1;hetGla2;myoDav1;myoLuc2;conCri1;chrAsi1	22	calJac3;otoGar3;speTri2;micOch1;perManBai1;mm10;oryCun2;ochPri3;vicPac2;orcOrc1;balAcu1;panHod1;bosTau8;bisBis1;capHir1;equCab2;cerSim1;felCat8;musFur1;pteAle1;loxAfr3;triMan1	5
GLYAT	0.0106579	0.187555		6	37	0	NA	0	NA	0
MEPCE	0.0106985	0.187833		5	33	1	myoLuc2	1	camFer1	1
PLBD2	0.0107718	0.187833		4	36	1	conCri1	0	NA	1
SYNJ2BP	0.0107744	0.187833		6	38	1	chrAsi1	0	NA	1
TTLL9	0.0107313	0.187833		6	39	1	nanGal1	0	NA	1
NFKBID	0.0107317	0.187833		6	40	0	NA	0	NA	0
OXSR1	0.0107662	0.187833		4	35	0	NA	0	NA	0
ZC3H12B	0.0107205	0.187833		5	37	0	NA	0	NA	0
COG3	0.0107928	0.187906		5	35	0	NA	0	NA	0
PPP1R3G	0.0108393	0.187972		4	26	1	hetGla2	0	NA	1
UBE2E2	0.0108388	0.187972		4	33	1	chrAsi1	0	NA	1
C18orf21	0.0108307	0.187972		4	37	0	NA	0	NA	0
CCDC105	0.0109056	0.188816		5	33	1	nanGal1	0	NA	1
AOC1	0.0109452	0.188816		4	34	0	NA	0	NA	0
SLC35E4	0.010928	0.188816		5	36	0	NA	0	NA	0
TMEM110_MUSTN1	0.0109421	0.188816		6	36	0	NA	0	NA	0
FEM1C	0.0109929	0.18939		6	38	0	NA	0	NA	0
C4orf47	0.011034	0.189604		6	36	0	NA	0	NA	0
MRAP2	0.0110225	0.189604		5	39	0	NA	0	NA	0
C19orf54	0.0111239	0.190405		4	41	0	NA	0	NA	0
XRRA1	0.0111036	0.190405		6	35	0	NA	0	NA	0
ZNF277	0.0111126	0.190405		6	36	0	NA	0	NA	0
CCNI2	0.0111884	0.191013		5	33	4	nanGal1;myoDav1;myoLuc2;conCri1	9	otoGar3;micOch1;perManBai1;mm10;rn6;vicPac2;camFer1;panHod1;musFur1	3
SLC1A7	0.0111759	0.191013		5	34	1	nanGal1	0	NA	1
GNG8	0.0112944	0.192573		5	34	0	NA	1	tarSyr2	0
ETAA1	0.0113228	0.19281		6	36	2	nanGal1;hetGla2	0	NA	2
SYNJ2BP_COX16	0.0113864	0.193642		5	36	1	chrAsi1	0	NA	1
DCTN1	0.0114524	0.194264		6	36	0	NA	0	NA	0
HOXD1	0.0114498	0.194264		3	27	0	NA	0	NA	0
TBX22	0.0114832	0.194286		4	32	1	chrAsi1	0	NA	1
CNOT11	0.0114799	0.194286		5	26	0	NA	0	NA	0
TNFSF4	0.0115089	0.194473		6	38	0	NA	0	NA	0
GPN2	0.0115301	0.194581		6	36	0	NA	0	NA	0
GIMAP5	0.0115779	0.194947		4	32	0	NA	0	NA	0
RRAD	0.0115813	0.194947		5	35	0	NA	0	NA	0
EPPIN	0.0117286	0.197175		6	40	2	nanGal1;conCri1	1	canFam3	2
CRISP2	0.0117597	0.197195		5	37	1	hetGla2	0	NA	1
PGK2	0.0117551	0.197195		4	34	0	NA	0	NA	0
MAGEF1	0.0118034	0.197676		6	37	6	nanGal1;hetGla2;myoDav1;myoLuc2;conCri1;chrAsi1	17	tarSyr2;otoGar3;micOch1;mm10;rn6;octDeg1;oryCun2;ochPri3;vicPac2;camFer1;orcOrc1;balAcu1;equCab2;cerSim1;eptFus1;loxAfr3;triMan1	5
TTC3	0.0118491	0.197941		6	33	1	hetGla2	2	cavPor3;octDeg1	1
GUCY2C	0.0118388	0.197941		5	35	0	NA	0	NA	0
NRSN2	0.0118761	0.197999		6	41	1	myoLuc2	0	NA	1
MPC1	0.0118827	0.197999		3	26	0	NA	0	NA	0
KLHDC7A	0.011972	0.199236		4	34	0	NA	0	NA	0
IL15RA	0.0120117	0.199395		5	39	0	NA	0	NA	0
TSC1	0.0120111	0.199395		5	36	0	NA	0	NA	0
CLPB	0.0120508	0.199791		6	35	0	NA	0	NA	0
CRNKL1	0.0120848	0.199853		6	40	0	NA	0	NA	0
POLR2I	0.0120822	0.199853		6	41	0	NA	0	NA	0
PRKRIP1	0.0121321	0.200316		6	35	0	NA	0	NA	0
PRPF6	0.0121509	0.200316		4	33	0	NA	0	NA	0
RBM12B	0.0121607	0.200316		5	39	0	NA	0	NA	0
TRIM16L	0.0121735	0.200316		6	36	0	NA	0	NA	0
GPR62	0.01223	0.200746		5	27	1	myoLuc2	0	NA	1
KDELR2	0.0122264	0.200746		5	40	0	NA	0	NA	0
FLNB	0.0122801	0.201318		5	37	0	NA	0	NA	0
PRR15	0.0123454	0.201637		6	35	1	chrAsi1	0	NA	1
OSGEPL1	0.0123241	0.201637		5	40	0	NA	0	NA	0
URB1	0.0123375	0.201637		5	32	0	NA	0	NA	0
EPCAM	0.012448	0.202628		6	35	1	nanGal1	0	NA	1
C9orf153	0.0124351	0.202628		4	39	0	NA	1	rn6	0
CARS2	0.0124521	0.202628		5	29	0	NA	0	NA	0
FBXO16	0.0124696	0.202662		6	40	0	NA	0	NA	0
ABI1	0.012563	0.203929		6	40	0	NA	0	NA	0
HAGHL	0.012638	0.204394		4	36	3	hetGla2;myoDav1;chrAsi1	4	tarSyr2;otoGar3;loxAfr3;triMan1	3
METTL7B	0.0126381	0.204394		5	39	2	myoDav1;conCri1	1	odoRosDiv1	2
ZAR1L	0.0126159	0.204394		6	33	1	chrAsi1	0	NA	1
SPTLC1	0.0127147	0.205381		5	33	0	NA	0	NA	0
CASP4	0.0128331	0.207039		5	32	1	chrAsi1	1	perManBai1	1
CEP72	0.0129315	0.208213		5	33	2	nanGal1;hetGla2	2	octDeg1;orcOrc1	2
ADRBK2	0.0129374	0.208213		5	33	0	NA	0	NA	0
BRIX1	0.0129949	0.20863		5	37	0	NA	0	NA	0
KNSTRN	0.0129875	0.20863		6	36	0	NA	0	NA	0
BAI3	0.0131128	0.210127		5	33	1	nanGal1	0	NA	1
CCDC175	0.0131359	0.210127		5	38	1	hetGla2	0	NA	1
SPATC1L	0.0131266	0.210127		5	32	1	hetGla2	0	NA	1
SPATA16	0.0133216	0.21284		5	34	0	NA	0	NA	0
RASSF4	0.0133644	0.213265		5	39	0	NA	0	NA	0
ANKLE1	0.01339	0.213415		4	37	1	conCri1	3	tarSyr2;micOch1;perManBai1	1
GPX5	0.0134353	0.213429		5	37	1	hetGla2	0	NA	1
GRAP	0.0134244	0.213429		6	34	1	chrAsi1	0	NA	1
MBOAT1	0.0134394	0.213429		6	34	0	NA	0	NA	0
TXNRD3	0.0135622	0.214937		6	32	1	hetGla2	0	NA	1
SVIP	0.0135669	0.214937		5	33	0	NA	0	NA	0
UBAP2L	0.0135941	0.215109		6	33	0	NA	0	NA	0
GOLGA2	0.013657	0.215651		6	39	2	myoDav1;chrAsi1	0	NA	2
ACTR10	0.013661	0.215651		5	37	1	conCri1	0	NA	1
SYT10	0.0137252	0.216405		4	36	0	NA	0	NA	0
MRPL1	0.013806	0.21742		6	35	0	NA	0	NA	0
ARPC2	0.0139086	0.218456		6	41	1	hetGla2	0	NA	1
JARID2	0.0138949	0.218456		6	30	0	NA	0	NA	0
VAV3	0.0139215	0.218456		6	33	0	NA	0	NA	0
HORMAD2	0.0139515	0.218564		6	37	1	chrAsi1	0	NA	1
C1orf74	0.0139615	0.218564		5	41	0	NA	0	NA	0
PALB2	0.0140532	0.219479		6	38	3	nanGal1;myoDav1;conCri1	4	micOch1;perManBai1;mm10;rn6	3
NUDT8	0.0140389	0.219479		3	31	0	NA	0	NA	0
TTC6	0.0142112	0.221685		4	33	1	hetGla2	0	NA	1
GRAMD4	0.0142468	0.221978		4	27	1	myoDav1	0	NA	1
MANSC1	0.0143696	0.223627		5	41	0	NA	0	NA	0
ACSBG2	0.0144883	0.224944		4	33	1	hetGla2	1	otoGar3	1
AGK	0.0144883	0.224944		6	36	0	NA	0	NA	0
BRCC3	0.0145128	0.225059		6	37	0	NA	0	NA	0
ARHGEF4	0.0145502	0.225172		6	34	3	myoDav1;myoLuc2;chrAsi1	1	eptFus1	2
TXNDC11	0.0145542	0.225172		6	38	1	chrAsi1	0	NA	1
C12orf66	0.014633	0.225862		5	41	0	NA	0	NA	0
VASH2	0.014633	0.225862		5	41	0	NA	0	NA	0
OXER1	0.0148105	0.227666		5	36	3	nanGal1;hetGla2;conCri1	12	otoGar3;speTri2;micOch1;perManBai1;mm10;rn6;cavPor3;octDeg1;oryCun2;turTru2;orcOrc1;balAcu1	3
MYL1	0.0148184	0.227666		5	40	0	NA	0	NA	0
ST6GALNAC5	0.0148189	0.227666		5	32	0	NA	0	NA	0
TWSG1	0.0148069	0.227666		5	40	0	NA	0	NA	0
BSG	0.0148409	0.227738		5	37	0	NA	0	NA	0
ANO1	0.0149139	0.228167		4	33	0	NA	0	NA	0
NOP2	0.0149207	0.228167		6	41	0	NA	0	NA	0
PXYLP1	0.0149038	0.228167		5	40	0	NA	0	NA	0
PCDHGB7	0.0149727	0.228698		3	28	1	nanGal1	0	NA	1
HSD17B11	0.01506	0.229766		5	34	0	NA	0	NA	0
BCL2A1	0.0151173	0.229978		3	39	1	nanGal1	2	perManBai1;mm10	1
CXorf38	0.0151262	0.229978		5	31	0	NA	0	NA	0
PDE10A	0.0151098	0.229978		5	37	0	NA	0	NA	0
CCL26	0.0151821	0.230297		5	37	2	nanGal1;hetGla2	3	tarSyr2;ochPri3;triMan1	2
MT1M	0.0151756	0.230297		4	27	2	nanGal1;myoDav1	3	calJac3;tarSyr2;micOch1	2
FAM83A	0.0154802	0.234011		6	31	1	hetGla2	0	NA	1
PPP1R2	0.0154658	0.234011		5	36	0	NA	0	NA	0
WDR11	0.0154481	0.234011		6	35	0	NA	0	NA	0
BNIP3	0.0155936	0.235396		5	40	1	myoLuc2	0	NA	1
IFITM10	0.0156075	0.235396		4	27	0	NA	0	NA	0
GSTA4	0.015685	0.236296		5	41	0	NA	2	mm10;rn6	0
CYB5R2	0.0157265	0.236651		6	42	1	hetGla2	0	NA	1
AC110615.1	0.0157815	0.236666		6	41	2	nanGal1;myoLuc2	11	ochPri3;vicPac2;camFer1;turTru2;orcOrc1;balAcu1;bosTau8;bisBis1;capHir1;pteAle1;pteVam1	2
ALDH3A1	0.0157591	0.236666		5	34	1	hetGla2	2	loxAfr3;triMan1	1
C17orf64	0.0157993	0.236666		6	41	1	hetGla2	0	NA	1
USP47	0.0157982	0.236666		5	39	0	NA	0	NA	0
FAM83C	0.0159277	0.23832		6	39	0	NA	0	NA	0
ZIC4	0.0159517	0.238408		6	33	0	NA	0	NA	0
JAK3	0.0160148	0.239081		5	33	1	myoDav1	0	NA	1
PGPEP1L	0.0160401	0.239188		6	38	2	myoLuc2;conCri1	2	calJac3;felCat8	2
MILR1	0.0162279	0.241716		5	36	3	hetGla2;conCri1;chrAsi1	8	speTri2;perManBai1;mm10;cavPor3;octDeg1;oryCun2;ochPri3;odoRosDiv1	3
SOHLH2	0.0162842	0.24228		5	40	0	NA	0	NA	0
NECAB1	0.016323	0.242584		6	30	0	NA	0	NA	0
LRRC43	0.0163624	0.242634		5	34	1	nanGal1	0	NA	1
RACGAP1	0.0163631	0.242634		6	35	1	nanGal1	0	NA	1
FAM227B	0.0163839	0.242669		6	30	1	hetGla2	0	NA	1
FAM150B	0.0164253	0.24277		4	28	0	NA	0	NA	0
PLAC1	0.0164275	0.24277		6	39	0	NA	0	NA	0
AURKAIP1	0.016502	0.243598		5	38	0	NA	0	NA	0
TMPRSS12	0.0166415	0.244315		6	37	1	hetGla2	0	NA	1
ZNF660	0.0166801	0.244315		6	40	1	nanGal1	1	perManBai1	1
ACPP	0.0166757	0.244315		5	40	0	NA	0	NA	0
HPCAL4	0.0166279	0.244315		5	38	0	NA	0	NA	0
LIF	0.0166182	0.244315		6	38	0	NA	0	NA	0
PTGES3L	0.0166731	0.244315		6	41	0	NA	0	NA	0
RAI1	0.0166556	0.244315		4	30	0	NA	0	NA	0
MTL5	0.0167173	0.244587		4	31	0	NA	0	NA	0
PBDC1	0.0167494	0.244786		4	29	0	NA	0	NA	0
WFDC1	0.0167748	0.244886		5	22	0	NA	0	NA	0
AGR3	0.0168773	0.245168		5	38	2	nanGal1;hetGla2	4	vicPac2;felCat8;odoRosDiv1;lepWed1	2
DTD2	0.0168188	0.245168		6	39	1	nanGal1	0	NA	1
NANOS3	0.016887	0.245168		6	40	0	NA	0	NA	0
RTCB	0.0168648	0.245168		5	37	0	NA	0	NA	0
SRP54	0.0168615	0.245168		5	39	0	NA	0	NA	0
HDAC6	0.0169745	0.246168		4	35	1	myoDav1	3	camFer1;bosTau8;capHir1	1
PROCA1	0.0170111	0.246427		6	38	1	hetGla2	0	NA	1
CCR9	0.0170676	0.246434		5	41	0	NA	0	NA	0
HSD17B1	0.0170311	0.246434		4	33	0	NA	0	NA	0
KIAA1524	0.0170513	0.246434		5	40	0	NA	0	NA	0
TMEM120B	0.0170923	0.246521		6	31	1	conCri1	0	NA	1
C3AR1	0.0171123	0.24654		6	42	1	conCri1	0	NA	1
ZCCHC14	0.0171584	0.246935		5	27	0	NA	0	NA	0
DDX46	0.0172021	0.247294		6	34	0	NA	0	NA	0
CENPU	0.0172795	0.248137		6	38	0	NA	0	NA	0
TUT1	0.0173381	0.248708		5	38	0	NA	0	NA	0
DHX16	0.0173786	0.249017		5	38	1	myoDav1	1	capHir1	1
ACER3	0.0175908	0.251785		5	35	0	NA	0	NA	0
SLAMF9	0.0176305	0.25208		5	39	2	nanGal1;hetGla2	6	panPan1;tarSyr2;turTru2;orcOrc1;balAcu1;felCat8	2
BMP1	0.0177399	0.253096		5	38	0	NA	0	NA	0
CELF4	0.0177298	0.253096		5	24	0	NA	0	NA	0
FAM229B	0.0177678	0.25322		5	41	0	NA	0	NA	0
C1orf56	0.0181675	0.255054		4	38	1	hetGla2	1	equCab2	1
CERK	0.0181556	0.255054		3	29	1	myoDav1	0	NA	1
IGSF5	0.0181864	0.255054		6	37	1	myoLuc2	2	rhiRox1;saiBol1	1
TSPAN31	0.0181698	0.255054		6	42	1	myoLuc2	0	NA	1
AQP3	0.0181694	0.255054		6	41	0	NA	0	NA	0
CAMK1G	0.0181161	0.255054		5	35	0	NA	0	NA	0
CFB	0.0181698	0.255054		6	42	0	NA	0	NA	0
EMC4	0.0181698	0.255054		6	42	0	NA	0	NA	0
GDPD2	0.0181291	0.255054		6	41	0	NA	0	NA	0
KCNE2	0.0181698	0.255054		6	42	0	NA	0	NA	0
RPRD1A	0.0180422	0.255054		6	41	0	NA	0	NA	0
SH3BP4	0.0181278	0.255054		5	37	0	NA	0	NA	0
TMEM159	0.0179907	0.255054		5	42	0	NA	0	NA	0
TMEM173	0.0181859	0.255054		6	41	0	NA	0	NA	0
ZBTB37	0.0181698	0.255054		6	42	0	NA	0	NA	0
C7orf31	0.0182648	0.255881		6	41	1	hetGla2	1	balAcu1	1
TALDO1	0.0182896	0.255957		5	37	0	NA	0	NA	0
DOHH	0.0183437	0.256171		5	26	1	myoDav1	0	NA	1
CCL25	0.0183362	0.256171		6	40	0	NA	0	NA	0
GJA9_MYCBP	0.0184213	0.256983		6	41	6	nanGal1;hetGla2;myoDav1;myoLuc2;conCri1;chrAsi1	9	papAnu2;perManBai1;mm10;rn6;cavPor3;octDeg1;ochPri3;lepWed1;eptFus1	5
TBL3	0.0185056	0.257646		5	38	0	NA	0	NA	0
USP33	0.0185079	0.257646		5	39	0	NA	0	NA	0
ZSCAN9	0.0185707	0.257976		3	32	2	hetGla2;conCri1	8	speTri2;mm10;ochPri3;panHod1;capHir1;canFam3;odoRosDiv1;lepWed1	2
CACNA1E	0.0185538	0.257976		5	24	0	NA	0	NA	0
CRYBA2	0.0185959	0.258055		6	39	3	myoLuc2;conCri1;chrAsi1	1	eptFus1	3
PPP6R2	0.0187058	0.259307		6	31	1	conCri1	0	NA	1
ZNF501	0.0189361	0.260541		4	35	3	hetGla2;myoDav1;chrAsi1	5	mm10;cavPor3;oryCun2;panHod1;eptFus1	3
TMEM91	0.0190786	0.260541		6	37	3	myoDav1;myoLuc2;conCri1	1	eptFus1	2
KIAA1107	0.0192263	0.260541		6	41	1	myoLuc2	0	NA	1
PPP1R11	0.0192263	0.260541		6	41	1	myoLuc2	0	NA	1
UBAP1L	0.0191069	0.260541		3	28	1	chrAsi1	1	bosTau8	1
ALDOB	0.0192554	0.260541		6	41	0	NA	0	NA	0
BCS1L	0.0192269	0.260541		6	41	0	NA	0	NA	0
CA14	0.0192311	0.260541		6	41	0	NA	0	NA	0
CCDC12	0.019227	0.260541		6	41	0	NA	0	NA	0
ENPP1	0.0188437	0.260541		5	35	0	NA	0	NA	0
FAM178B	0.0192263	0.260541		6	41	0	NA	0	NA	0
GPR3	0.019227	0.260541		6	41	0	NA	0	NA	0
HINT2	0.0192273	0.260541		6	41	0	NA	0	NA	0
IDH3G	0.019227	0.260541		6	41	0	NA	0	NA	0
KIAA1671	0.0188475	0.260541		5	34	0	NA	0	NA	0
MSI2	0.0188869	0.260541		5	34	0	NA	0	NA	0
NDC80	0.0192669	0.260541		6	39	0	NA	0	NA	0
NTN4	0.0192164	0.260541		6	41	0	NA	0	NA	0
PDE6B	0.019113	0.260541		4	27	0	NA	0	NA	0
PDHB	0.0190208	0.260541		6	40	0	NA	0	NA	0
PTAFR	0.0192686	0.260541		6	40	0	NA	0	NA	0
TMEM55A	0.019227	0.260541		6	41	0	NA	0	NA	0
YTHDF1	0.0188751	0.260541		5	38	0	NA	0	NA	0
ZDHHC12	0.0191192	0.260541		6	41	0	NA	0	NA	0
ETV5	0.0193818	0.261803		6	41	1	myoLuc2	0	NA	1
CEP85	0.0194113	0.261933		6	40	0	NA	0	NA	0
CLEC7A	0.0194414	0.262072		6	41	0	NA	0	NA	0
HIGD1C	0.0195102	0.262463		5	37	1	hetGla2	3	otoGar3;turTru2;orcOrc1	1
AK7	0.0194957	0.262463		6	32	0	NA	0	NA	0
ICAM3	0.0196502	0.262976		5	38	2	nanGal1;conCri1	3	perManBai1;mm10;rn6	2
FAM177B	0.0196766	0.262976		5	36	2	myoDav1;myoLuc2	5	mm10;rn6;octDeg1;pteAle1;pteVam1	1
KIF2C	0.0196052	0.262976		6	39	1	nanGal1	0	NA	1
NUDT6	0.0196242	0.262976		4	31	1	nanGal1	0	NA	1
ASB1	0.0196879	0.262976		5	37	0	NA	0	NA	0
PYCR1	0.0196495	0.262976		5	39	0	NA	0	NA	0
SLC25A38	0.0195685	0.262976		6	40	0	NA	0	NA	0
LRRIQ4	0.0197883	0.26405		6	36	1	myoDav1	0	NA	1
APLN	0.0198174	0.264084		6	37	5	nanGal1;hetGla2;myoDav1;conCri1;chrAsi1	18	micOch1;mm10;rn6;octDeg1;oryCun2;ochPri3;vicPac2;camFer1;orcOrc1;balAcu1;panHod1;bosTau8;capHir1;equCab2;cerSim1;musFur1;loxAfr3;triMan1	5
HIST1H2BG	0.0198308	0.264084		6	39	0	NA	0	NA	0
ANKRD53	0.0198725	0.264181		5	41	2	nanGal1;hetGla2	0	NA	2
AKAP6	0.0199239	0.264181		5	35	0	NA	0	NA	0
HERPUD2	0.0198934	0.264181		6	39	0	NA	0	NA	0
RAD51D	0.0199363	0.264181		5	38	0	NA	0	NA	0
SMIM13	0.0199382	0.264181		6	32	0	NA	0	NA	0
MAGEB4	0.0201082	0.264437		4	31	4	nanGal1;hetGla2;myoLuc2;chrAsi1	14	otoGar3;speTri2;perManBai1;rn6;cavPor3;camFer1;orcOrc1;equCab2;felCat8;canFam3;musFur1;odoRosDiv1;lepWed1;triMan1	4
C4orf51	0.0201431	0.264437		6	41	3	nanGal1;hetGla2;conCri1	7	micOch1;turTru2;orcOrc1;balAcu1;cerSim1;canFam3;odoRosDiv1	3
DDX53	0.0200142	0.264437		5	30	2	nanGal1;hetGla2	6	micOch1;perManBai1;mm10;rn6;orcOrc1;felCat8	2
WDR27	0.0201515	0.264437		4	32	2	nanGal1;myoLuc2	7	perManBai1;vicPac2;camFer1;orcOrc1;balAcu1;panHod1;musFur1	2
PIEZO2	0.020052	0.264437		5	26	1	myoLuc2	1	camFer1	1
SDC1	0.0203492	0.264437		6	40	1	myoLuc2	0	NA	1
BCL2L11	0.0203379	0.264437		6	40	0	NA	0	NA	0
CD164	0.0203353	0.264437		6	39	0	NA	0	NA	0
CDH10	0.0201464	0.264437		5	30	0	NA	0	NA	0
FBXO34	0.0203783	0.264437		6	40	0	NA	0	NA	0
GNB2L1	0.0202895	0.264437		6	40	0	NA	0	NA	0
LIN7C	0.0203485	0.264437		6	40	0	NA	0	NA	0
MYEF2	0.0200469	0.264437		6	41	0	NA	0	NA	0
NMT1	0.0201619	0.264437		6	39	0	NA	0	NA	0
RASL11A	0.0203674	0.264437		6	40	0	NA	0	NA	0
RMDN2	0.0201694	0.264437		6	39	0	NA	0	NA	0
RP11_73M18.2	0.0202441	0.264437		4	36	0	NA	0	NA	0
RPS27A	0.0201014	0.264437		6	40	0	NA	0	NA	0
RPS6KB2	0.0202377	0.264437		6	40	0	NA	0	NA	0
TIGD4	0.0203488	0.264437		6	40	0	NA	0	NA	0
XXbac_BPG116M5.17	0.0203477	0.264437		6	40	0	NA	0	NA	0
USH2A	0.0204812	0.265511		5	29	2	nanGal1;chrAsi1	2	papAnu2;micOch1	2
KRT6A	0.0206016	0.26681		3	24	1	nanGal1	0	NA	1
ARHGDIG	0.0206464	0.267005		5	35	0	NA	0	NA	0
OTOA	0.0206571	0.267005		4	35	0	NA	0	NA	0
ELSPBP1	0.0207273	0.26765		4	35	2	nanGal1;conCri1	6	perManBai1;mm10;rn6;turTru2;orcOrc1;balAcu1	2
COMMD3_BMI1	0.02078	0.268068		6	39	0	NA	0	NA	0
DENND1A	0.0208086	0.268174		5	31	0	NA	0	NA	0
ADAM33	0.0209381	0.269056		4	35	0	NA	0	NA	0
MAP2K1	0.0209214	0.269056		6	39	0	NA	0	NA	0
RIMBP3C	0.0209205	0.269056		5	30	0	NA	0	NA	0
PVR	0.0209701	0.269205		6	31	1	myoLuc2	0	NA	1
NKAIN1	0.0211433	0.271165		6	39	0	NA	0	NA	0
CNOT6L	0.0212042	0.271681		6	35	0	NA	0	NA	0
LNP1	0.0212403	0.27188		5	39	1	nanGal1	4	panTro4;panPan1;rhiRox1;calJac3	1
COA1	0.0213123	0.272009		4	36	2	hetGla2;chrAsi1	3	speTri2;oryCun2;felCat8	2
EIF2B4	0.0213053	0.272009		6	38	0	NA	0	NA	0
SNX11	0.0212953	0.272009		6	42	0	NA	0	NA	0
C19orf80	0.0214542	0.272206		6	39	1	myoLuc2	0	NA	1
ARHGDIA	0.0214254	0.272206		6	39	0	NA	0	NA	0
CSNK1A1	0.0215393	0.272206		6	39	0	NA	0	NA	0
FRS3	0.0215425	0.272206		6	39	0	NA	0	NA	0
HCRTR2	0.0213598	0.272206		6	38	0	NA	0	NA	0
KLHL8	0.0214306	0.272206		6	39	0	NA	0	NA	0
MPEG1	0.021409	0.272206		6	38	0	NA	0	NA	0
SERPINB5	0.0215703	0.272206		6	39	0	NA	0	NA	0
SLC35B4	0.0215752	0.272206		6	39	0	NA	0	NA	0
TMEM186	0.0215434	0.272206		6	39	0	NA	0	NA	0
UBE2M	0.0215406	0.272206		6	39	0	NA	0	NA	0
ZNF32	0.0215229	0.272206		6	39	0	NA	0	NA	0
COMMD3	0.0216232	0.272292		6	38	1	conCri1	0	NA	1
LNPEP	0.0216054	0.272292		6	38	0	NA	0	NA	0
ODF3L1	0.0216889	0.272599		6	39	1	hetGla2	0	NA	1
IQUB	0.0216695	0.272599		5	34	0	NA	0	NA	0
DENND5B	0.0217306	0.272862		5	33	0	NA	0	NA	0
MANSC4	0.0217777	0.272934		6	39	1	hetGla2	0	NA	1
TEX264	0.0217677	0.272934		6	37	0	NA	0	NA	0
C18orf63	0.0219276	0.2739		5	38	0	NA	0	NA	0
CENPJ	0.0219215	0.2739		6	38	0	NA	0	NA	0
PDE4D	0.0219377	0.2739		4	34	0	NA	0	NA	0
SPATA3	0.0219337	0.2739		6	38	0	NA	0	NA	0
GCM1	0.0219874	0.27426		6	38	0	NA	0	NA	0
CYP2R1	0.0220202	0.274411		6	38	0	NA	0	NA	0
ZC3HAV1	0.0221553	0.275833		6	35	0	NA	0	NA	0
RORC	0.0221793	0.275872		6	39	0	NA	0	NA	0
LYZ	0.0222656	0.276164		5	39	1	hetGla2	1	micOch1	1
TEX37	0.0222388	0.276164		6	37	1	hetGla2	1	balAcu1	1
PIN4	0.0222619	0.276164		5	35	0	NA	0	NA	0
METTL20	0.0223182	0.276287		6	40	1	hetGla2	1	cavPor3	1
BPIFB3	0.0223382	0.276287		5	36	0	NA	3	rhiRox1;turTru2;orcOrc1	0
PTAR1	0.0223382	0.276287		6	39	0	NA	0	NA	0
MAML1	0.0223714	0.276438		5	33	0	NA	0	NA	0
ACOT13	0.0226673	0.279571		6	38	0	NA	0	NA	0
C22orf23	0.0226568	0.279571		6	39	0	NA	0	NA	0
B3GNT4	0.0227469	0.279596		4	40	2	nanGal1;conCri1	3	cavPor3;octDeg1;odoRosDiv1	2
TM9SF4	0.022805	0.279596		6	38	1	myoLuc2	0	NA	1
KCND3	0.0228371	0.279596		6	38	0	NA	0	NA	0
LPAR1	0.022793	0.279596		6	38	0	NA	0	NA	0
LYPLA2	0.0228031	0.279596		6	38	0	NA	0	NA	0
PCSK7	0.0228389	0.279596		6	38	0	NA	0	NA	0
RORB	0.022837	0.279596		6	38	0	NA	0	NA	0
SIM1	0.0227932	0.279596		6	38	0	NA	0	NA	0
ZNF891	0.0229914	0.27973		5	37	4	nanGal1;hetGla2;myoDav1;conCri1	9	tarSyr2;speTri2;oryCun2;felCat8;canFam3;musFur1;odoRosDiv1;lepWed1;eptFus1	4
NCBP2L	0.022936	0.27973		6	40	3	nanGal1;hetGla2;conCri1	8	otoGar3;speTri2;perManBai1;mm10;rn6;ochPri3;camFer1;bosTau8	3
ZP4	0.0229903	0.27973		5	38	2	conCri1;chrAsi1	1	mm10	2
CCDC38	0.0229348	0.27973		6	38	1	conCri1	0	NA	1
DPT	0.0229251	0.27973		6	39	0	NA	0	NA	0
LCA5	0.0229982	0.27973		6	37	0	NA	0	NA	0
OBSL1	0.0229875	0.27973		5	35	0	NA	0	NA	0
ZNF333	0.0230419	0.280004		5	33	3	nanGal1;hetGla2;myoDav1	3	otoGar3;speTri2;cavPor3	3
FAM63A	0.0230849	0.280268		6	39	0	NA	0	NA	0
DBX1	0.0231321	0.280583		5	31	1	myoDav1	1	ponAbe2	1
EHBP1L1	0.0233831	0.281277		6	33	5	nanGal1;hetGla2;myoDav1;myoLuc2;conCri1	26	saiBol1;tarSyr2;otoGar3;speTri2;micOch1;perManBai1;mm10;rn6;cavPor3;octDeg1;vicPac2;turTru2;orcOrc1;balAcu1;panHod1;bosTau8;bisBis1;capHir1;cerSim1;felCat8;canFam3;musFur1;odoRosDiv1;lepWed1;pteAle1;pteVam1	4
NEMF	0.0232932	0.281277		6	34	1	nanGal1	0	NA	1
ARFGAP1	0.0233021	0.281277		5	38	0	NA	0	NA	0
B3GNTL1	0.0233403	0.281277		5	29	0	NA	0	NA	0
C1QTNF1	0.0233747	0.281277		6	39	0	NA	0	NA	0
OS9	0.0233185	0.281277		5	37	0	NA	0	NA	0
PCDHGC5	0.0232878	0.281277		6	37	0	NA	0	NA	0
PLK1	0.0234025	0.281277		5	38	0	NA	0	NA	0
PPP1R8	0.023354	0.281277		6	40	0	NA	0	NA	0
WDSUB1	0.0233684	0.281277		6	37	0	NA	0	NA	0
FAM179B	0.0235218	0.281942		6	35	2	nanGal1;conCri1	1	equCab2	2
CD40	0.0235122	0.281942		6	37	0	NA	0	NA	0
PORCN	0.0234803	0.281942		6	37	0	NA	0	NA	0
C9orf43	0.0236601	0.282504		6	41	2	hetGla2;conCri1	1	loxAfr3	2
FAM221B	0.0236621	0.282504		5	39	2	nanGal1;chrAsi1	3	rn6;balAcu1;felCat8	2
QRFPR	0.0236485	0.282504		5	38	1	myoDav1	3	orcOrc1;balAcu1;pteAle1	1
FNDC1	0.0236758	0.282504		3	29	0	NA	3	micOch1;oryCun2;ochPri3	0
TRIP12	0.0236361	0.282504		6	38	0	NA	0	NA	0
AKAP8L	0.0238499	0.284324		6	40	0	NA	0	NA	0
C21orf2	0.0239265	0.28498		5	37	0	NA	0	NA	0
OAS3	0.023959	0.28511		5	34	2	nanGal1;hetGla2	3	camFer1;bosTau8;lepWed1	2
CDH22	0.0239987	0.285325		4	22	1	myoLuc2	0	NA	1
HIST1H3E	0.0241311	0.286642		6	30	0	NA	0	NA	0
PDE1C	0.0241943	0.287134		6	33	0	NA	0	NA	0
PKD2L1	0.0242749	0.287474		6	37	2	hetGla2;chrAsi1	3	turTru2;orcOrc1;balAcu1	2
MAN2C1	0.0242862	0.287474		6	36	2	myoDav1;myoLuc2	1	eptFus1	1
DENND2D	0.0242883	0.287474		6	41	0	NA	0	NA	0
EME2	0.0245211	0.289759		4	30	2	nanGal1;hetGla2	4	turTru2;orcOrc1;balAcu1;loxAfr3	2
CDRT1	0.0245254	0.289759		5	36	1	hetGla2	0	NA	1
SPAG11B	0.0246364	0.29081		5	38	1	hetGla2	2	tarSyr2;perManBai1	1
SPATA45	0.024682	0.291089		6	40	1	hetGla2	1	orcOrc1	1
HIST1H2BL	0.0247148	0.291216		5	30	1	chrAsi1	0	NA	1
LAPTM4A	0.0247601	0.291489		6	40	0	NA	0	NA	0
PICK1	0.0248734	0.292561		4	37	0	NA	0	NA	0
DHX9	0.0249612	0.293333		6	41	1	nanGal1	0	NA	1
FAM135A	0.0250557	0.294182		6	35	0	NA	0	NA	0
MTRR	0.0251343	0.294842		4	37	0	NA	0	NA	0
TIMELESS	0.0251887	0.295218		5	42	1	nanGal1	2	turTru2;orcOrc1	1
RBM23	0.0252356	0.295505		5	41	2	nanGal1;chrAsi1	5	perManBai1;mm10;rn6;cavPor3;octDeg1	2
CNR2	0.0253498	0.296579		6	40	1	myoLuc2	0	NA	1
LRRC27	0.0254336	0.296984		5	34	2	nanGal1;hetGla2	5	oryCun2;ochPri3;turTru2;orcOrc1;balAcu1	2
ELOVL4	0.0254448	0.296984		6	40	0	NA	0	NA	0
EPB41	0.0254519	0.296984		6	36	0	NA	0	NA	0
LARS2	0.0255104	0.297404		6	36	0	NA	0	NA	0
RIMKLA	0.0255683	0.297815		6	41	0	NA	0	NA	0
CAT	0.0257117	0.299221		6	39	1	myoLuc2	0	NA	1
ZNF227	0.0257649	0.299577		6	38	3	nanGal1;conCri1;chrAsi1	5	perManBai1;rn6;oryCun2;ochPri3;loxAfr3	3
OTOS	0.0258827	0.300416		6	36	1	conCri1	0	NA	1
RP11_176H8.1	0.0258666	0.300416		6	41	1	nanGal1	0	NA	1
NXPE4	0.0260055	0.301048		3	36	1	conCri1	6	panHod1;bosTau8;bisBis1;capHir1;felCat8;musFur1	1
CARS	0.0259737	0.301048		4	32	0	NA	0	NA	0
SELV	0.025991	0.301048		4	29	0	NA	0	NA	0
LYPD6B	0.0260349	0.301124		6	34	0	NA	0	NA	0
LY86	0.0261197	0.301841		6	35	0	NA	0	NA	0
FGF8	0.0262373	0.302934		6	35	0	NA	0	NA	0
HLA_DQA1	0.0264277	0.304599		5	32	1	chrAsi1	0	NA	1
DEFB135	0.026411	0.304599		5	34	0	NA	0	NA	0
PIAS1	0.0264647	0.304747		6	38	1	nanGal1	0	NA	1
RAB8B	0.0264867	0.304747		6	40	0	NA	0	NA	0
KRTAP6_1	0.0265373	0.305034		5	33	1	myoDav1	0	NA	1
AKIP1	0.0265578	0.305034		6	39	0	NA	0	NA	0
C12orf42	0.0266593	0.305094		5	36	4	nanGal1;hetGla2;myoDav1;myoLuc2	9	octDeg1;balAcu1;panHod1;bosTau8;bisBis1;capHir1;canFam3;eptFus1;triMan1	3
ASB17	0.0266081	0.305094		6	41	1	nanGal1	0	NA	1
SPP1	0.0266457	0.305094		6	40	1	chrAsi1	0	NA	1
ARL5B	0.0266761	0.305094		6	34	0	NA	0	NA	0
LAMC1	0.0266787	0.305094		6	35	0	NA	0	NA	0
TBC1D15	0.0267172	0.305271		6	36	0	NA	0	NA	0
PFN4	0.0267923	0.305864		6	41	2	hetGla2;myoLuc2	1	eptFus1	2
PDZRN4	0.0269758	0.307692		6	35	1	myoLuc2	0	NA	1
C11orf44	0.0270376	0.308131		5	37	5	nanGal1;hetGla2;myoDav1;myoLuc2;conCri1	27	rheMac3;macFas5;papAnu2;calJac3;saiBol1;tarSyr2;otoGar3;speTri2;micOch1;mm10;rn6;cavPor3;octDeg1;oryCun2;ochPri3;vicPac2;camFer1;orcOrc1;balAcu1;panHod1;capHir1;equCab2;cerSim1;felCat8;canFam3;musFur1;pteAle1	4
ACO2	0.0271243	0.30832		6	35	0	NA	0	NA	0
CCDC130	0.0271109	0.30832		6	35	0	NA	0	NA	0
GCN1L1	0.0270838	0.30832		6	35	0	NA	0	NA	0
MT_ND4L	0.0272328	0.309228		4	39	1	myoLuc2	1	otoGar3	1
FIGF	0.0272511	0.309228		6	36	0	NA	0	NA	0
ERAP2	0.0273402	0.309973		5	41	3	nanGal1;hetGla2;chrAsi1	8	perManBai1;mm10;rn6;cavPor3;octDeg1;oryCun2;ochPri3;felCat8	3
IQCF2	0.0274184	0.310593		5	40	0	NA	0	NA	0
FAM160A1	0.0274796	0.310927		6	37	1	myoLuc2	1	panPan1	1
ACVR2B	0.027495	0.310927		5	39	0	NA	0	NA	0
ADAMTS9	0.0275366	0.311131		6	34	0	NA	0	NA	0
RNF151	0.0275679	0.311218		6	39	0	NA	0	NA	0
COPRS	0.0276811	0.312229		5	37	1	nanGal1	1	perManBai1	1
PROM2	0.0277382	0.312339		6	35	1	myoLuc2	0	NA	1
INTS10	0.0277307	0.312339		5	35	0	NA	0	NA	0
TMEM185B	0.0277791	0.312533		6	38	0	NA	0	NA	0
VMP1	0.0278959	0.31358		6	37	1	myoLuc2	0	NA	1
COX6B2	0.0279226	0.313612		4	28	0	NA	1	cavPor3	0
MED16	0.0280284	0.314533		6	31	0	NA	0	NA	0
ZGRF1	0.028093	0.31499		6	35	6	nanGal1;hetGla2;myoDav1;myoLuc2;conCri1;chrAsi1	16	tarSyr2;otoGar3;speTri2;micOch1;perManBai1;mm10;rn6;cavPor3;vicPac2;camFer1;canFam3;musFur1;odoRosDiv1;lepWed1;pteAle1;pteVam1	5
RAPGEFL1	0.0282624	0.316621		5	29	0	NA	0	NA	0
GABPB2	0.0283276	0.317081		6	34	1	conCri1	0	NA	1
U2AF1L4	0.0283892	0.317233		6	41	4	hetGla2;myoDav1;myoLuc2;conCri1	6	tarSyr2;otoGar3;cavPor3;octDeg1;ochPri3;eptFus1	3
GLIPR1L2	0.0283807	0.317233		6	37	0	NA	0	NA	0
SIRPB1	0.0284204	0.317313		4	26	0	NA	1	cavPor3	0
IFI6	0.0285	0.317664		6	37	3	nanGal1;hetGla2;conCri1	8	speTri2;micOch1;perManBai1;mm10;rn6;cavPor3;octDeg1;ochPri3	3
TCEAL1	0.0284773	0.317664		6	39	1	hetGla2	0	NA	1
AARD	0.0285723	0.318202		6	27	2	hetGla2;chrAsi1	2	tarSyr2;otoGar3	2
SLC4A2	0.0286026	0.31827		5	36	1	nanGal1	0	NA	1
DGKI	0.0286615	0.318657		4	35	0	NA	0	NA	0
KIAA1919	0.0287717	0.319345		6	39	0	NA	0	NA	0
MSN	0.0287483	0.319345		6	34	0	NA	0	NA	0
PIGQ	0.0291986	0.32381		5	31	0	NA	0	NA	0
BTF3	0.0292796	0.324435		5	36	0	NA	0	NA	0
KIF1B	0.0293365	0.324529		6	34	1	myoLuc2	0	NA	1
RNMT	0.0293372	0.324529		6	39	0	NA	0	NA	0
BPIFA3	0.029373	0.324652		6	38	0	NA	0	NA	0
ZNF133	0.0294695	0.325446		5	35	1	myoDav1	1	mm10	1
PXDN	0.0295298	0.325841		4	27	0	NA	0	NA	0
SEMA3E	0.0297102	0.327557		6	33	0	NA	0	NA	0
MAP1S	0.0297849	0.327559		5	29	2	nanGal1;hetGla2	2	cavPor3;octDeg1	2
HERC2	0.0297714	0.327559		5	30	1	myoDav1	1	camFer1	1
SETD7	0.0297357	0.327559		6	39	0	NA	0	NA	0
TMLHE	0.0298618	0.328068		6	28	2	myoLuc2;conCri1	1	pteAle1	2
LBP	0.0298809	0.328068		4	38	1	myoLuc2	0	NA	1
ARL14	0.0299068	0.32808		6	41	1	conCri1	0	NA	1
MCM5	0.0299889	0.328707		6	34	0	NA	0	NA	0
GSTP1	0.0300897	0.329539		5	35	0	NA	0	NA	0
GPR158	0.0301238	0.329639		5	33	0	NA	0	NA	0
WDR72	0.0302769	0.331039		6	33	0	NA	0	NA	0
ENTHD1	0.0303623	0.331424		5	34	1	nanGal1	0	NA	1
NCR1	0.0303417	0.331424		3	30	0	NA	0	NA	0
NDUFAF7	0.0304331	0.331922		6	42	0	NA	1	ochPri3	0
PGPEP1	0.0306088	0.333563		6	37	0	NA	0	NA	0
ITSN1	0.0309617	0.33713		3	35	1	myoDav1	0	NA	1
C3orf30	0.0311881	0.338478		5	39	2	myoDav1;conCri1	14	rheMac3;macFas5;papAnu2;chlSab2;tarSyr2;speTri2;mm10;rn6;panHod1;bosTau8;bisBis1;capHir1;equCab2;cerSim1	2
CACNA1F	0.0311837	0.338478		6	34	2	nanGal1;chrAsi1	0	NA	2
LARGE	0.0311583	0.338478		6	31	0	NA	0	NA	0
WSCD2	0.0311837	0.338478		6	32	0	NA	0	NA	0
KRT17	0.0312827	0.339226		5	41	0	NA	0	NA	0
SMARCD1	0.0314296	0.340539		6	39	1	myoLuc2	0	NA	1
NCF2	0.0314619	0.340609		6	41	1	myoLuc2	0	NA	1
TSTD1	0.0316036	0.341863		5	38	1	myoLuc2	1	eptFus1	1
ACAP3	0.0318646	0.344404		4	27	1	myoDav1	0	NA	1
KRR1	0.0320125	0.345436		6	41	2	myoDav1;myoLuc2	0	NA	1
THADA	0.0319904	0.345436		6	32	0	NA	1	pteAle1	0
MAVS	0.0322198	0.347106		6	39	2	myoDav1;chrAsi1	0	NA	2
MYLIP	0.0322028	0.347106		6	37	0	NA	0	NA	0
GBGT1	0.0325278	0.350138		4	41	1	hetGla2	2	rn6;ochPri3	1
KCNAB3	0.0326941	0.351642		6	39	0	NA	0	NA	0
DKK4	0.0327732	0.352206		6	42	2	myoDav1;myoLuc2	1	eptFus1	1
FAM193A	0.0328436	0.352675		5	33	0	NA	0	NA	0
LONP2	0.0330173	0.353963		5	37	0	NA	0	NA	0
MS4A7	0.0329964	0.353963		5	35	0	NA	0	NA	0
MGAT4D	0.0333098	0.35681		6	34	2	nanGal1;hetGla2	4	calJac3;turTru2;orcOrc1;felCat8	2
GLIPR1	0.0334303	0.35781		5	40	0	NA	0	NA	0
CBR1	0.0334761	0.35801		5	37	0	NA	1	loxAfr3	0
SLFN11	0.0335633	0.358652		4	28	1	nanGal1	0	NA	1
ARGLU1	0.0336224	0.358993		6	41	0	NA	0	NA	0
ALLC	0.0338694	0.361338		3	39	1	hetGla2	4	calJac3;turTru2;orcOrc1;balAcu1	1
OIT3	0.0339012	0.361385		6	37	1	myoLuc2	0	NA	1
FOXN4	0.0339793	0.361925		4	39	1	hetGla2	1	vicPac2	1
INPP5D	0.0341269	0.363204		6	31	0	NA	0	NA	0
SHBG	0.0344375	0.366035		6	42	2	nanGal1;chrAsi1	4	equCab2;cerSim1;pteAle1;pteVam1	2
CISD3	0.0344484	0.366035		6	40	0	NA	0	NA	0
FAM186B	0.034558	0.366609		6	42	1	hetGla2	3	turTru2;orcOrc1;balAcu1	1
SCN3A	0.0345569	0.366609		5	35	1	nanGal1	0	NA	1
HEPN1	0.0348293	0.369191		6	40	4	nanGal1;hetGla2;myoLuc2;chrAsi1	10	otoGar3;micOch1;perManBai1;cavPor3;octDeg1;oryCun2;cerSim1;felCat8;canFam3;musFur1	4
C1orf100	0.0349031	0.369676		5	40	1	nanGal1	0	NA	1
GPR64	0.0349738	0.370128		6	34	0	NA	0	NA	0
C11orf49	0.0350599	0.370445		6	38	0	NA	0	NA	0
ICK	0.0350329	0.370445		5	40	0	NA	0	NA	0
JAM3	0.0353764	0.373191		6	40	0	NA	0	NA	0
LMLN	0.0353558	0.373191		6	34	0	NA	0	NA	0
AC069063.2	0.0354877	0.373352		5	36	4	nanGal1;hetGla2;myoLuc2;conCri1	7	otoGar3;micOch1;perManBai1;mm10;octDeg1;ochPri3;odoRosDiv1	4
CXorf58	0.0354669	0.373352		6	34	1	hetGla2	0	NA	1
ATP8B2	0.0355048	0.373352		6	36	0	NA	0	NA	0
GJA5	0.0354366	0.373352		5	40	0	NA	0	NA	0
SIT1	0.035537	0.373393		6	42	0	NA	0	NA	0
DHX29	0.035705	0.374859		6	38	0	NA	0	NA	0
SNRPB	0.0359667	0.377307		5	40	0	NA	0	NA	0
PARVA	0.036156	0.378785		3	25	1	nanGal1	0	NA	1
ZNF384	0.036165	0.378785		5	40	0	NA	0	NA	0
MICAL2	0.0363434	0.380352		5	40	0	NA	0	NA	0
CPLX3	0.036465	0.38102		6	39	1	chrAsi1	0	NA	1
UBXN11	0.0364583	0.38102		6	37	1	myoLuc2	0	NA	1
PTGER1	0.0366645	0.382802		5	25	0	NA	0	NA	0
DGKZ	0.0368478	0.384412		6	35	0	NA	0	NA	0
HGS	0.0371673	0.387438		4	33	0	NA	0	NA	0
CD96	0.0374379	0.389951		4	36	1	hetGla2	3	calJac3;turTru2;orcOrc1	1
PNPLA7	0.037599	0.391321		3	27	1	hetGla2	5	ponAbe2;otoGar3;turTru2;orcOrc1;balAcu1	1
RIT2	0.0376765	0.391817		5	36	1	nanGal1	1	balAcu1	1
RBM12	0.0377716	0.392498		5	39	1	chrAsi1	1	speTri2	1
FGD2	0.0378647	0.392538		5	33	1	hetGla2	0	NA	1
SMC2	0.0378618	0.392538		4	32	1	nanGal1	0	NA	1
RNF8	0.0378609	0.392538		6	37	0	NA	0	NA	0
MCOLN3	0.0380151	0.393538		6	41	1	nanGal1	0	NA	1
CCDC33	0.0380208	0.393538		6	35	0	NA	5	balAcu1;panHod1;bosTau8;bisBis1;capHir1	0
PIEZO1	0.0380802	0.393844		3	31	2	myoLuc2;chrAsi1	2	capHir1;pteAle1	2
BEX5	0.0381942	0.394714		5	32	1	nanGal1	1	mm10	1
CD244	0.0382348	0.394823		5	40	1	nanGal1	0	NA	1
FAM71E2	0.038276	0.39494		3	29	2	nanGal1;hetGla2	7	ponAbe2;rheMac3;macFas5;papAnu2;octDeg1;orcOrc1;equCab2	2
PODXL2	0.0384082	0.395994		6	35	0	NA	0	NA	0
AREG	0.0384873	0.3965		6	39	0	NA	0	NA	0
ARID4A	0.0385761	0.397105		5	39	0	NA	0	NA	0
PRKAR2A	0.0386792	0.397856		3	24	1	hetGla2	0	NA	1
FAM166B	0.0387347	0.398117		5	40	1	hetGla2	2	cavPor3;cerSim1	1
HERC6	0.0388944	0.399362		3	29	1	nanGal1	2	orcOrc1;balAcu1	1
ANXA1	0.0389371	0.399362		6	35	0	NA	0	NA	0
BATF2	0.0389467	0.399362		5	41	0	NA	0	NA	0
EHD3	0.039051	0.400121		6	41	0	NA	0	NA	0
TTC31	0.0392692	0.402044		6	41	3	nanGal1;hetGla2;chrAsi1	13	perManBai1;mm10;rn6;octDeg1;oryCun2;ochPri3;turTru2;orcOrc1;balAcu1;panHod1;bosTau8;bisBis1;capHir1	3
GPR179	0.0393313	0.402368		5	34	2	nanGal1;conCri1	3	calJac3;micOch1;musFur1	2
NUP155	0.0398899	0.407452		6	34	1	myoLuc2	0	NA	1
PCNXL2	0.0398899	0.407452		5	29	0	NA	0	NA	0
PSMD8	0.039935	0.407596		6	39	0	NA	0	NA	0
LRRC70	0.0401687	0.409665		6	40	5	nanGal1;hetGla2;myoDav1;myoLuc2;conCri1	12	otoGar3;micOch1;perManBai1;mm10;rn6;cavPor3;octDeg1;oryCun2;ochPri3;pteAle1;pteVam1;eptFus1	4
TXNDC2	0.0402501	0.409869		5	36	2	hetGla2;conCri1	8	rheMac3;macFas5;papAnu2;chlSab2;rhiRox1;calJac3;speTri2;camFer1	2
CLDN17	0.0402508	0.409869		4	39	0	NA	0	NA	0
JSRP1	0.0403169	0.410225		6	30	0	NA	0	NA	0
PRSS38	0.0404222	0.41098		3	38	0	NA	0	NA	0
GSAP	0.0404992	0.411191		6	30	0	NA	0	NA	0
ZFYVE21	0.0405053	0.411191		6	35	0	NA	0	NA	0
FAM170A	0.0406114	0.411952		5	42	0	NA	0	NA	0
FGFR4	0.0407885	0.41343		6	40	0	NA	0	NA	0
ADD2	0.0408848	0.414088		6	40	0	NA	0	NA	0
C1orf168	0.0410172	0.415111		5	36	1	nanGal1	0	NA	1
SLC1A5	0.0411673	0.41631		5	30	0	NA	0	NA	0
UBA1	0.0412201	0.416525		6	38	1	myoLuc2	0	NA	1
SLC20A1	0.0414934	0.418966		6	39	0	NA	0	NA	0
LY6G5C	0.0415383	0.419099		6	41	1	hetGla2	1	micOch1	1
C4orf46	0.0416116	0.419197		5	38	1	hetGla2	0	NA	1
ZC3H10	0.04158	0.419197		6	41	1	myoLuc2	0	NA	1
ERGIC2	0.0416976	0.419744		6	38	0	NA	0	NA	0
RP1_139D8.6	0.0419824	0.422287		4	41	0	NA	0	NA	0
MAGEB5	0.0420473	0.42248		6	33	3	hetGla2;myoDav1;myoLuc2	9	tarSyr2;speTri2;cavPor3;octDeg1;ochPri3;turTru2;orcOrc1;felCat8;triMan1	2
KRTAP27_1	0.0420655	0.42248		6	37	0	NA	1	rhiRox1	0
PRTFDC1	0.0421111	0.422616		6	39	2	hetGla2;myoDav1	4	cavPor3;bosTau8;bisBis1;triMan1	2
CKAP2L	0.0421527	0.422713		6	39	0	NA	0	NA	0
PRDM11	0.0425754	0.426626		6	36	0	NA	0	NA	0
VSIG4	0.0426299	0.426849		5	34	1	chrAsi1	1	otoGar3	1
DSC2	0.042689	0.427116		6	36	0	NA	0	NA	0
ART5	0.0428617	0.42852		6	42	0	NA	0	NA	0
SMS	0.0430143	0.429394		6	39	0	NA	0	NA	0
TIMP1	0.0429974	0.429394		6	37	0	NA	0	NA	0
ASIC3	0.0430614	0.429539		6	35	0	NA	0	NA	0
ALDH6A1	0.0431004	0.429604		6	40	1	myoLuc2	1	rhiRox1	1
PLCG2	0.0433084	0.431351		5	33	0	NA	0	NA	0
TMCO5A	0.0434341	0.432278		6	38	1	hetGla2	0	NA	1
ADAMTS13	0.0439396	0.436979		4	27	2	myoDav1;chrAsi1	6	cavPor3;octDeg1;felCat8;odoRosDiv1;loxAfr3;triMan1	2
PODXL	0.0445025	0.441251		6	37	2	conCri1;chrAsi1	2	canFam3;triMan1	2
NUP210L	0.0445029	0.441251		6	28	1	hetGla2	0	NA	1
ABHD16B	0.0444791	0.441251		4	27	0	NA	1	orcOrc1	0
IQCF6	0.0444905	0.441251		5	41	0	NA	0	NA	0
RP11_315D16.2	0.0445434	0.441321		4	34	1	hetGla2	2	cavPor3;octDeg1	1
ALOX15B	0.0446166	0.441701		4	31	1	hetGla2	3	calJac3;vicPac2;balAcu1	1
SCML2	0.0446487	0.441701		5	32	1	myoLuc2	2	perManBai1;rn6	1
CISH	0.044837	0.443231		6	41	0	NA	0	NA	0
SLC27A3	0.0450276	0.444782		4	30	0	NA	0	NA	0
LCE2D	0.045106	0.445224		5	30	2	nanGal1;conCri1	2	rhiRox1;micOch1	2
SCGN	0.0451447	0.445272		6	34	1	myoLuc2	0	NA	1
CPA5	0.0452025	0.445339		6	40	1	hetGla2	0	NA	1
MINOS1	0.045219	0.445339		6	39	0	NA	0	NA	0
DAK	0.045332	0.44612		6	38	1	myoLuc2	0	NA	1
CCDC154	0.0453679	0.44614		5	36	1	nanGal1	3	chlSab2;turTru2;orcOrc1	1
KANK1	0.0454113	0.446234		5	39	0	NA	0	NA	0
GAPT	0.0454817	0.446594		4	40	0	NA	0	NA	0
LAMP3	0.0456702	0.448112		6	40	0	NA	0	NA	0
MAP3K14	0.0457663	0.448721		5	41	0	NA	0	NA	0
DRD3	0.0458247	0.44896		6	39	0	NA	0	NA	0
CPE	0.0460019	0.450362		5	25	0	NA	2	rhiRox1;rn6	0
ZNF44	0.0461617	0.451257		5	24	3	myoLuc2;conCri1;chrAsi1	7	panPan1;perManBai1;mm10;octDeg1;balAcu1;equCab2;odoRosDiv1	3
MMEL1	0.0461452	0.451257		3	32	0	NA	0	NA	0
ZHX2	0.0464297	0.45354		5	34	0	NA	0	NA	0
HPS5	0.046483	0.453725		5	35	0	NA	0	NA	0
TRH	0.0466129	0.454657		6	31	1	hetGla2	1	balAcu1	1
PYGM	0.0467146	0.455312		6	37	0	NA	0	NA	0
RBM25	0.0469752	0.457514		5	37	0	NA	1	rn6	0
SLC39A8	0.0471346	0.45839		6	34	1	myoDav1	0	NA	1
ABCD1	0.047106	0.45839		6	34	0	NA	0	NA	0
C4orf19	0.0473182	0.459674		6	40	0	NA	0	NA	0
CCDC151	0.0473363	0.459674		5	35	0	NA	0	NA	0
CDC25B	0.0475399	0.461312		6	41	0	NA	0	NA	0
ZSWIM2	0.0475865	0.461424		6	35	1	hetGla2	0	NA	1
SPAG11A	0.0476339	0.461545		5	37	1	hetGla2	3	tarSyr2;micOch1;perManBai1	1
KRT14	0.047793	0.462747		5	38	0	NA	1	ponAbe2	0
RDH5	0.0478404	0.462866		6	41	2	nanGal1;chrAsi1	0	NA	2
THEGL	0.0479013	0.463116		4	31	0	NA	0	NA	0
CD302	0.0484987	0.468548		6	42	0	NA	0	NA	0
SERINC4	0.0485829	0.469019		6	41	3	nanGal1;conCri1;chrAsi1	4	cavPor3;octDeg1;balAcu1;triMan1	3
TRIO	0.0487838	0.470613		3	23	1	myoLuc2	1	papAnu2	1
KLK1	0.0495765	0.477912		5	37	1	chrAsi1	0	NA	1
FZD6	0.0496852	0.47861		6	39	0	NA	0	NA	0
GZF1	0.0497655	0.478684		6	37	0	NA	0	NA	0
RP11_463D19.2	0.0497389	0.478684		6	36	0	NA	0	NA	0
CCDC60	0.0501165	0.48171		4	35	0	NA	0	NA	0
LCN6	0.0502336	0.482484		4	34	0	NA	2	panTro4;panPan1	0
PRSS57	0.0507584	0.486303		6	34	2	nanGal1;hetGla2	3	micOch1;cavPor3;octDeg1	2
TMEM254	0.050762	0.486303		6	35	1	conCri1	0	NA	1
FREM1	0.0507494	0.486303		5	35	0	NA	0	NA	0
S100PBP	0.0507786	0.486303		6	40	0	NA	0	NA	0
PLB1	0.0509426	0.487509		5	35	1	conCri1	0	NA	1
C11orf84	0.0509785	0.487509		6	41	0	NA	0	NA	0
NME7	0.0510885	0.488208		4	38	0	NA	0	NA	0
ZNF318	0.0513525	0.490375		5	40	0	NA	0	NA	0
LIPJ	0.0514297	0.490757		3	34	2	nanGal1;hetGla2	6	panTro4;ponAbe2;calJac3;tarSyr2;speTri2;musFur1	2
RRM2B	0.0514772	0.490856		6	37	0	NA	0	NA	0
SEMA4F	0.0516105	0.491772		6	37	0	NA	0	NA	0
ALDH2	0.0517482	0.492728		6	38	0	NA	0	NA	0
BCL3	0.0518891	0.493714		5	32	0	NA	0	NA	0
DCAF16	0.0523359	0.497606		6	41	3	nanGal1;hetGla2;chrAsi1	7	otoGar3;micOch1;perManBai1;mm10;rn6;cavPor3;octDeg1	3
C22orf46	0.0524856	0.49867		6	42	0	NA	1	calJac3	0
MAP6	0.0526441	0.499816		5	32	1	myoLuc2	2	rhiRox1;oryCun2	1
TOMM20L	0.0527227	0.500202		5	30	2	nanGal1;hetGla2	4	calJac3;octDeg1;turTru2;orcOrc1	2
TIGD6	0.05305	0.502946		5	41	5	hetGla2;myoDav1;myoLuc2;conCri1;chrAsi1	19	ponAbe2;calJac3;saiBol1;tarSyr2;micOch1;perManBai1;mm10;rn6;cavPor3;octDeg1;oryCun2;ochPri3;turTru2;orcOrc1;panHod1;bosTau8;bisBis1;capHir1;eptFus1	4
PPEF2	0.0532841	0.502997		5	37	2	nanGal1;conCri1	1	cavPor3	2
IZUMO4	0.0532145	0.502997		6	30	2	myoDav1;myoLuc2	1	eptFus1	1
LCE2B	0.0531373	0.502997		3	22	1	conCri1	1	triMan1	1
NIPSNAP3B	0.0532343	0.502997		5	34	1	nanGal1	2	calJac3;saiBol1	1
NUDT16L1	0.0532828	0.502997		5	30	0	NA	0	NA	0
ZWINT	0.0531802	0.502997		5	35	0	NA	0	NA	0
SPATS1	0.0533881	0.503619		5	40	0	NA	0	NA	0
ERAS	0.0535636	0.504913		6	41	1	chrAsi1	1	oryCun2	1
RIF1	0.0541203	0.509797		4	41	0	NA	2	rn6;felCat8	0
ATAD5	0.054201	0.509829		6	30	2	nanGal1;hetGla2	2	cavPor3;canFam3	2
ST13	0.0541722	0.509829		6	33	0	NA	0	NA	0
KAZN	0.0545915	0.513136		4	30	1	myoDav1	1	felCat8	1
TROVE2	0.0548646	0.515336		6	40	0	NA	0	NA	0
ADIG	0.0549056	0.515355		6	41	2	nanGal1;hetGla2	1	cavPor3	2
RAPGEF5	0.0550566	0.516405		6	37	0	NA	0	NA	0
TRAM1L1	0.0551733	0.517132		3	29	1	myoLuc2	1	vicPac2	1
C6orf222	0.0559614	0.522448		6	40	3	myoDav1;myoLuc2;conCri1	1	eptFus1	2
COL8A1	0.0559425	0.522448		6	41	1	myoLuc2	0	NA	1
CSTF2T	0.0559177	0.522448		5	37	1	myoLuc2	0	NA	1
MNT	0.0559779	0.522448		5	29	0	NA	0	NA	0
SAMHD1	0.0559236	0.522448		4	32	0	NA	0	NA	0
SLC10A6	0.0559098	0.522448		5	37	0	NA	0	NA	0
ZNF106	0.0561691	0.523861		5	37	1	myoDav1	2	ponAbe2;rn6	1
KIAA0226	0.0565993	0.527501		6	37	2	nanGal1;hetGla2	5	micOch1;perManBai1;mm10;cavPor3;octDeg1	2
SRRM1	0.0566791	0.527872		6	38	1	myoLuc2	0	NA	1
NOL8	0.0568689	0.529214		6	35	1	hetGla2	1	bosTau8	1
PPP1R13L	0.0569035	0.529214		4	30	1	hetGla2	2	octDeg1;bisBis1	1
LIPT1	0.0569534	0.529306		5	40	1	myoLuc2	1	eptFus1	1
TDRD15	0.0571103	0.53039		5	38	1	chrAsi1	5	tarSyr2;vicPac2;turTru2;orcOrc1;balAcu1	1
HPS4	0.0572486	0.531301		6	40	1	chrAsi1	1	bisBis1	1
TKTL1	0.0574897	0.533069		5	34	1	nanGal1	1	micOch1	1
CHAF1A	0.0575199	0.533069		5	34	0	NA	0	NA	0
RP11_849H4.2	0.0575869	0.533316		6	40	0	NA	0	NA	0
PRR30	0.0578328	0.534842		6	38	1	hetGla2	2	tarSyr2;mm10	1
PDZD2	0.0578293	0.534842		6	36	0	NA	0	NA	0
PAPLN	0.0579727	0.535761		4	35	0	NA	2	vicPac2;capHir1	0
CTD_3222D19.2	0.0584132	0.539076		5	34	0	NA	0	NA	0
PLCB3	0.058403	0.539076		6	35	0	NA	0	NA	0
GSTM5	0.0585141	0.539619		4	32	1	hetGla2	2	mm10;musFur1	1
C1orf228	0.0585538	0.539619		5	30	0	NA	1	lepWed1	0
RGS20	0.058615	0.539806		6	31	1	hetGla2	1	speTri2	1
ARL11	0.0587278	0.540467		5	38	0	NA	0	NA	0
RETSAT	0.0588398	0.541121		6	36	1	myoLuc2	1	odoRosDiv1	1
EEA1	0.0589568	0.54182		6	31	0	NA	0	NA	0
MROH5	0.0591374	0.543101		3	34	3	nanGal1;hetGla2;chrAsi1	18	panPan1;calJac3;saiBol1;tarSyr2;speTri2;micOch1;mm10;rn6;octDeg1;ochPri3;turTru2;orcOrc1;balAcu1;panHod1;cerSim1;odoRosDiv1;loxAfr3;triMan1	3
HMGN5	0.0593318	0.544507		6	32	1	hetGla2	1	octDeg1	1
ZNF226	0.0594002	0.544756		5	41	1	nanGal1	4	panPan1;perManBai1;oryCun2;ochPri3	1
TRIM68	0.0594447	0.544786		4	38	1	chrAsi1	2	micOch1;cavPor3	1
TAS2R1	0.0594923	0.544844		6	37	2	hetGla2;conCri1	2	orcOrc1;triMan1	2
PRR27	0.0596	0.545452		5	36	2	myoDav1;myoLuc2	4	panPan1;cavPor3;odoRosDiv1;loxAfr3	1
MROH2B	0.0596939	0.545932		5	35	0	NA	2	turTru2;orcOrc1	0
THNSL2	0.0601484	0.549293		5	36	1	nanGal1	0	NA	1
SPATA33	0.0601552	0.549293		4	37	0	NA	1	cerSim1	0
SRP72	0.0601862	0.549293		6	32	0	NA	0	NA	0
HINFP	0.0602301	0.549314		6	42	0	NA	0	NA	0
APBB2	0.0605997	0.552253		6	36	0	NA	0	NA	0
FAM220A	0.0606361	0.552253		5	38	0	NA	2	bosTau8;bisBis1	0
ASPRV1	0.0608278	0.553617		6	41	0	NA	0	NA	0
KIAA1731NL	0.0610202	0.554985		3	39	2	hetGla2;chrAsi1	8	calJac3;perManBai1;cavPor3;ochPri3;orcOrc1;balAcu1;odoRosDiv1;lepWed1	2
LYZL4	0.0611109	0.555428		6	39	1	hetGla2	0	NA	1
LIM2	0.0612406	0.556223		5	39	0	NA	0	NA	0
ASB18	0.061314	0.556507		5	30	1	conCri1	0	NA	1
CNGB3	0.0615878	0.558365		5	39	2	nanGal1;chrAsi1	1	balAcu1	2
FAM205A	0.0616034	0.558365		3	32	1	hetGla2	8	panPan1;calJac3;vicPac2;camFer1;orcOrc1;felCat8;canFam3;odoRosDiv1	1
RP4_559A3.7	0.0617361	0.558801		3	22	2	nanGal1;chrAsi1	1	vicPac2	2
DPPA2	0.0617138	0.558801		5	37	2	myoDav1;myoLuc2	1	eptFus1	1
LMBRD1	0.062177	0.562405		4	35	0	NA	0	NA	0
NIPAL1	0.0623624	0.563696		5	39	1	myoDav1	0	NA	1
ZNF280B	0.0625479	0.564986		4	36	0	NA	0	NA	0
FAM122C	0.0628077	0.566945		6	35	2	hetGla2;myoDav1	2	cavPor3;octDeg1	2
EPHX1	0.0629244	0.56761		6	36	1	myoDav1	0	NA	1
OLFM4	0.0631671	0.56941		6	39	0	NA	1	ochPri3	0
CDK3	0.0634116	0.569631		4	40	2	hetGla2;conCri1	3	rn6;cavPor3;octDeg1	2
TEN1_CDK3	0.0634116	0.569631		4	40	2	hetGla2;conCri1	3	rn6;cavPor3;octDeg1	2
GNL1	0.0633857	0.569631		6	40	1	myoDav1	0	NA	1
KCNK17	0.0634927	0.569631		4	34	1	hetGla2	1	mm10	1
LRRC69	0.063537	0.569631		6	39	1	hetGla2	0	NA	1
PADI6	0.0632349	0.569631		6	38	1	chrAsi1	1	bisBis1	1
GABRQ	0.0635146	0.569631		6	36	0	NA	0	NA	0
HAUS5	0.0632794	0.569631		6	41	0	NA	0	NA	0
MTMR8	0.0641481	0.57472		4	31	3	nanGal1;hetGla2;myoLuc2	10	otoGar3;micOch1;perManBai1;mm10;rn6;octDeg1;ochPri3;vicPac2;felCat8;canFam3	3
SAA4	0.0642321	0.575082		5	32	3	myoLuc2;conCri1;chrAsi1	3	cavPor3;vicPac2;cerSim1	3
RECK	0.06438	0.575723		6	34	1	myoDav1	0	NA	1
SRRM2	0.064391	0.575723		5	37	0	NA	0	NA	0
MIR3654	0.0645098	0.576396		6	40	1	myoLuc2	1	bisBis1	1
ARL4C	0.0648311	0.578092		6	34	1	myoLuc2	1	rn6	1
GPR31	0.0647973	0.578092		3	36	1	hetGla2	2	otoGar3;oryCun2	1
WNK4	0.0648106	0.578092		5	37	0	NA	1	panPan1	0
PPP1R15B	0.0651057	0.580148		5	34	0	NA	0	NA	0
TNFRSF21	0.0651558	0.580203		5	38	0	NA	0	NA	0
HAUS6	0.0655439	0.583265		5	36	0	NA	0	NA	0
ADAM23	0.0656137	0.583493		5	36	0	NA	0	NA	0
RGL3	0.0657393	0.584217		5	32	1	hetGla2	0	NA	1
AC135068.1	0.0658208	0.584547		5	27	0	NA	1	ponAbe2	0
DCDC1	0.0658683	0.584576		6	39	2	nanGal1;hetGla2	4	calJac3;tarSyr2;cavPor3;ochPri3	2
PKHD1	0.0662131	0.587241		5	32	0	NA	1	rn6	0
DDX51	0.0662743	0.587389		3	22	0	NA	0	NA	0
NPFFR2	0.0663214	0.587412		6	38	1	hetGla2	1	canFam3	1
PDE6C	0.0664002	0.587715		6	37	1	chrAsi1	0	NA	1
NOX1	0.0665295	0.588465		5	35	1	conCri1	2	orcOrc1;balAcu1	1
HHLA1	0.0665987	0.588683		4	36	1	myoDav1	2	cavPor3;pteAle1	1
FUBP1	0.0666922	0.589114		6	40	0	NA	0	NA	0
BBIP1	0.0667904	0.589588		6	41	0	NA	0	NA	0
PTGDS	0.0670655	0.59162		5	32	0	NA	0	NA	0
C9orf50	0.0678559	0.598193		5	29	1	nanGal1	4	otoGar3;rn6;orcOrc1;lepWed1	1
TEX22	0.0680783	0.599752		4	26	1	hetGla2	0	NA	1
AC005477.1	0.0681606	0.600077		5	38	5	nanGal1;hetGla2;myoDav1;myoLuc2;conCri1	22	saiBol1;otoGar3;speTri2;mm10;cavPor3;octDeg1;oryCun2;ochPri3;vicPac2;camFer1;orcOrc1;balAcu1;panHod1;capHir1;cerSim1;felCat8;canFam3;musFur1;odoRosDiv1;lepWed1;pteAle1;eptFus1	4
INSL5	0.0686927	0.600754		6	41	3	myoDav1;myoLuc2;conCri1	8	rn6;balAcu1;felCat8;canFam3;musFur1;odoRosDiv1;lepWed1;eptFus1	2
FAM170B	0.0685793	0.600754		6	36	2	myoDav1;myoLuc2	1	saiBol1	1
IQCH	0.0686415	0.600754		6	35	1	hetGla2	1	vicPac2	1
NPVF	0.0685193	0.600754		6	41	2	myoDav1;myoLuc2	1	eptFus1	1
CUL9	0.0685795	0.600754		5	34	0	NA	2	perManBai1;pteAle1	0
GOLIM4	0.0686749	0.600754		6	37	0	NA	0	NA	0
GRINA	0.0686804	0.600754		5	35	0	NA	0	NA	0
OAS2	0.0684181	0.600754		5	37	0	NA	2	turTru2;orcOrc1	0
PLVAP	0.0683692	0.600754		4	34	0	NA	0	NA	0
PLXNA3	0.068623	0.600754		5	32	0	NA	1	camFer1	0
KIAA1875	0.0689102	0.601719		4	34	2	hetGla2;myoLuc2	10	ponAbe2;rheMac3;macFas5;rhiRox1;tarSyr2;speTri2;balAcu1;panHod1;pteAle1;pteVam1	2
PTPRM	0.0689183	0.601719		6	34	0	NA	1	panHod1	0
VIPR1	0.0689398	0.601719		6	38	0	NA	0	NA	0
FBXW10	0.0690049	0.601889		5	35	1	hetGla2	1	vicPac2	1
ST20_MTHFS	0.0694193	0.605104		3	41	0	NA	0	NA	0
ZZEF1	0.0694891	0.605312		6	37	1	myoLuc2	3	camFer1;panHod1;felCat8	1
EFCAB8	0.0695539	0.605476		5	37	2	nanGal1;hetGla2	5	chlSab2;vicPac2;camFer1;turTru2;orcOrc1	2
SPARCL1	0.0696008	0.605486		6	41	0	NA	0	NA	0
FAM24B	0.0696963	0.605917		4	39	1	conCri1	0	NA	1
SFMBT2	0.0698307	0.606686		6	30	1	chrAsi1	0	NA	1
RSPH10B	0.0698898	0.6068		6	31	1	myoLuc2	0	NA	1
WDHD1	0.0703352	0.610265		6	37	0	NA	1	panPan1	0
BANK1	0.0704067	0.610484		4	34	0	NA	0	NA	0
FAM189A1	0.0706976	0.612604		5	33	0	NA	0	NA	0
SPOCD1	0.0707597	0.61274		5	37	5	nanGal1;hetGla2;myoDav1;myoLuc2;conCri1	22	calJac3;saiBol1;micOch1;perManBai1;octDeg1;oryCun2;ochPri3;vicPac2;camFer1;turTru2;orcOrc1;balAcu1;panHod1;capHir1;equCab2;cerSim1;felCat8;musFur1;odoRosDiv1;pteAle1;pteVam1;eptFus1	4
GPR128	0.0708098	0.612772		6	35	0	NA	2	orcOrc1;balAcu1	0
SPANXN3	0.070877	0.612952		3	28	3	nanGal1;myoLuc2;conCri1	13	tarSyr2;perManBai1;mm10;cavPor3;oryCun2;orcOrc1;panHod1;bosTau8;capHir1;felCat8;canFam3;musFur1;lepWed1	3
CYLC1	0.0709886	0.613515		5	29	1	hetGla2	8	panPan1;calJac3;orcOrc1;panHod1;bosTau8;capHir1;cerSim1;musFur1	1
LRRC72	0.071153	0.613729		6	39	3	nanGal1;hetGla2;myoDav1	0	NA	3
SLC17A9	0.0711247	0.613729		5	38	1	hetGla2	1	ochPri3	1
PALM2_AKAP2	0.071081	0.613729		6	37	0	NA	1	mm10	0
SYCP2	0.0712513	0.614176		5	33	2	nanGal1;chrAsi1	2	panPan1;micOch1	2
XYLB	0.0714086	0.61513		6	33	0	NA	0	NA	0
NFE2L2	0.0725677	0.624707		6	41	1	conCri1	0	NA	1
CIB1	0.0728684	0.626887		6	41	0	NA	0	NA	0
FASTKD3	0.0731165	0.628202		6	38	0	NA	0	NA	0
SYCE2	0.0730711	0.628202		5	37	0	NA	1	oryCun2	0
AL357140.1	0.073987	0.635267		6	39	6	nanGal1;hetGla2;myoDav1;myoLuc2;conCri1;chrAsi1	29	rheMac3;macFas5;papAnu2;saiBol1;tarSyr2;otoGar3;speTri2;perManBai1;mm10;cavPor3;octDeg1;vicPac2;camFer1;turTru2;orcOrc1;balAcu1;panHod1;bosTau8;bisBis1;capHir1;felCat8;canFam3;musFur1;odoRosDiv1;lepWed1;pteAle1;pteVam1;loxAfr3;triMan1	5
AMICA1	0.0740649	0.635523		6	38	0	NA	0	NA	0
CLNK	0.0742354	0.636572		5	32	0	NA	1	otoGar3	0
GPR55	0.0743341	0.637005		6	42	0	NA	0	NA	0
GRM4	0.0744733	0.637784		5	34	0	NA	1	calJac3	0
GGA2	0.0747134	0.639425		6	37	1	chrAsi1	0	NA	1
LTB	0.0748407	0.640099		4	41	0	NA	0	NA	0
CD47	0.0755538	0.64578		6	38	0	NA	0	NA	0
HIST4H4	0.075613	0.645867		6	40	2	myoDav1;myoLuc2	3	camFer1;pteAle1;pteVam1	1
REG3G	0.0756772	0.645911		5	34	2	nanGal1;hetGla2	4	tarSyr2;speTri2;camFer1;orcOrc1	2
RSPH10B2	0.075716	0.645911		6	31	1	myoLuc2	1	rhiRox1	1
EMR3	0.0757673	0.645931		6	28	1	nanGal1	0	NA	1
TGM4	0.0760388	0.646674		4	39	4	hetGla2;myoLuc2;conCri1;chrAsi1	22	calJac3;otoGar3;speTri2;oryCun2;ochPri3;vicPac2;camFer1;turTru2;balAcu1;panHod1;bosTau8;bisBis1;capHir1;cerSim1;felCat8;canFam3;musFur1;odoRosDiv1;lepWed1;pteAle1;loxAfr3;triMan1	4
FMO3	0.0760994	0.646674		3	35	1	chrAsi1	2	tarSyr2;triMan1	1
RAX2	0.0759477	0.646674		6	30	1	hetGla2	4	rn6;cavPor3;octDeg1;ochPri3	1
YWHAH	0.0760624	0.646674		6	42	1	chrAsi1	0	NA	1
CASS4	0.0760719	0.646674		6	37	0	NA	0	NA	0
SLIT3	0.076261	0.64763		4	31	1	myoLuc2	0	NA	1
KLK12	0.0764933	0.649185		4	37	1	hetGla2	1	triMan1	1
CTU2	0.0768423	0.651727		5	37	0	NA	0	NA	0
NYX	0.0769645	0.652345		3	28	0	NA	0	NA	0
KIF27	0.0771325	0.653349		5	33	1	nanGal1	2	panPan1;cavPor3	1
KIF19	0.0775454	0.656425		5	32	1	myoDav1	2	cavPor3;octDeg1	1
GRIA1	0.0776797	0.657141		5	33	0	NA	1	odoRosDiv1	0
AP1M2	0.0777854	0.657613		6	34	1	myoLuc2	0	NA	1
ALOX15	0.0779057	0.658209		5	34	2	nanGal1;hetGla2	4	vicPac2;orcOrc1;equCab2;triMan1	2
FAM104A	0.0786143	0.663771		6	34	0	NA	0	NA	0
HES3	0.0789725	0.666369		5	28	1	nanGal1	0	NA	1
LAMP1	0.0792211	0.668039		5	41	2	myoDav1;myoLuc2	1	eptFus1	1
TMEM207	0.0793806	0.668956		6	39	0	NA	1	panPan1	0
TCEAL7	0.079643	0.669458		6	38	1	hetGla2	2	cavPor3;octDeg1	1
CFAP126	0.0795708	0.669458		6	41	0	NA	0	NA	0
DOPEY2	0.0795511	0.669458		3	33	0	NA	1	rn6	0
GRM7	0.07962	0.669458		6	30	0	NA	0	NA	0
RARS2	0.0797586	0.670003		6	40	0	NA	0	NA	0
DUSP11	0.0798527	0.670288		5	36	0	NA	0	NA	0
TLDC2	0.0798942	0.670288		6	38	0	NA	0	NA	0
TTF2	0.0801477	0.671988		6	35	1	chrAsi1	0	NA	1
ZAP70	0.080557	0.674386		4	30	1	chrAsi1	1	oryCun2	1
IL12RB1	0.0806381	0.674386		4	33	0	NA	0	NA	0
MINOS1_NBL1	0.080548	0.674386		6	37	0	NA	0	NA	0
NBL1	0.0806361	0.674386		6	37	0	NA	0	NA	0
TNRC6C	0.0809044	0.676185		4	34	1	myoDav1	4	camFer1;panHod1;capHir1;cerSim1	1
DDX17	0.0810387	0.676878		6	37	0	NA	0	NA	0
RNF149	0.0811996	0.677793		3	23	1	hetGla2	1	octDeg1	1
IL4	0.0815337	0.680152		6	40	0	NA	1	triMan1	0
C21orf62	0.0817487	0.681079		5	40	0	NA	1	micOch1	0
GALC	0.0817617	0.681079		6	36	0	NA	0	NA	0
GOLGB1	0.0817997	0.681079		4	39	0	NA	0	NA	0
ZNF597	0.0821587	0.683206		6	41	4	myoDav1;myoLuc2;conCri1;chrAsi1	6	orcOrc1;balAcu1;bisBis1;capHir1;eptFus1;loxAfr3	3
BBS9	0.0821264	0.683206		4	32	1	hetGla2	0	NA	1
CCDC121	0.0824927	0.685552		6	40	3	hetGla2;myoDav1;myoLuc2	6	perManBai1;rn6;cavPor3;octDeg1;bosTau8;eptFus1	2
MYOZ3	0.082725	0.687049		6	40	0	NA	0	NA	0
UMAD1	0.0828284	0.687476		6	40	0	NA	0	NA	0
ZNF862	0.0829681	0.687545		5	38	2	nanGal1;chrAsi1	3	mm10;octDeg1;musFur1	2
CLOCK	0.0830068	0.687545		6	38	0	NA	0	NA	0
RNF212	0.0830404	0.687545		4	37	0	NA	2	mm10;odoRosDiv1	0
SPAG16	0.0830451	0.687545		4	30	0	NA	0	NA	0
ERCC6	0.0835444	0.691245		6	38	0	NA	1	equCab2	0
PCGF2	0.0838766	0.693558		6	36	0	NA	0	NA	0
CYSRT1	0.0839487	0.69372		4	36	0	NA	1	octDeg1	0
ZNF222	0.0843826	0.69543		3	26	2	nanGal1;conCri1	7	micOch1;perManBai1;octDeg1;orcOrc1;balAcu1;bosTau8;loxAfr3	2
MMP10	0.084261	0.69543		5	36	2	myoDav1;myoLuc2	9	tarSyr2;vicPac2;camFer1;panHod1;capHir1;equCab2;cerSim1;canFam3;musFur1	1
GPATCH11	0.0843869	0.69543		5	39	0	NA	0	NA	0
MAEL	0.0844191	0.69543		6	39	0	NA	0	NA	0
PAIP1	0.0843983	0.69543		5	40	0	NA	0	NA	0
ARHGAP5	0.0845061	0.695713		5	35	0	NA	0	NA	0
XRCC3	0.0846781	0.696694		3	37	0	NA	0	NA	0
MOK	0.0848119	0.69736		4	37	1	hetGla2	0	NA	1
LCE3E	0.0850493	0.698877		5	32	1	conCri1	1	otoGar3	1
RBP7	0.0851808	0.699344		5	36	3	nanGal1;hetGla2;conCri1	6	cavPor3;oryCun2;ochPri3;panHod1;cerSim1;triMan1	3
URM1	0.0852122	0.699344		5	39	0	NA	0	NA	0
SLC5A9	0.0854184	0.700601		6	42	1	nanGal1	0	NA	1
C21orf58	0.0855057	0.700881		5	41	0	NA	2	otoGar3;canFam3	0
MYO5C	0.0856697	0.701789		5	35	0	NA	0	NA	0
TAS2R9	0.0857858	0.701821		3	32	2	nanGal1;hetGla2	8	panPan1;tarSyr2;otoGar3;octDeg1;panHod1;bosTau8;bisBis1;capHir1	2
EREG	0.0857469	0.701821		6	40	0	NA	0	NA	0
PHC2	0.0858331	0.701821		6	40	0	NA	1	ponAbe2	0
AKNA	0.0864097	0.706098		6	33	0	NA	2	panTro4;speTri2	0
C3orf52	0.0867419	0.708375		6	32	0	NA	0	NA	0
C16orf90	0.0868313	0.708666		6	40	1	hetGla2	3	orcOrc1;balAcu1;panHod1	1
FAM173A	0.0869216	0.708964		4	30	0	NA	0	NA	0
PTGDR2	0.087312	0.711709		4	28	0	NA	0	NA	0
CACNB1	0.0874403	0.712315		5	37	0	NA	1	ponAbe2	0
EIF2B1	0.0876725	0.713765		6	41	0	NA	0	NA	0
RIMBP2	0.0878299	0.714606		5	25	0	NA	1	panHod1	0
NMRK1	0.0879512	0.715152		6	39	0	NA	0	NA	0
CLEC4G	0.0887943	0.721281		5	33	1	myoDav1	2	otoGar3;rn6	1
GMEB2	0.0889721	0.721281		6	33	1	conCri1	0	NA	1
DGCR8	0.0889782	0.721281		6	38	0	NA	0	NA	0
LSS	0.0889383	0.721281		5	36	0	NA	0	NA	0
NEB	0.0888586	0.721281		4	23	0	NA	1	pteAle1	0
DIS3	0.0891624	0.722331		6	38	0	NA	1	ponAbe2	0
GPR33	0.0896066	0.725484		4	41	1	myoLuc2	3	ponAbe2;rn6;turTru2	1
BEND2	0.0897877	0.726504		4	23	2	nanGal1;hetGla2	7	otoGar3;speTri2;mm10;cavPor3;octDeg1;vicPac2;bosTau8	2
USP11	0.090159	0.728615		6	38	1	myoDav1	1	ponAbe2	1
CDK18	0.0901377	0.728615		5	34	0	NA	0	NA	0
SCN7A	0.0902213	0.728672		4	31	0	NA	0	NA	0
ASB16	0.0903764	0.729478		5	31	2	nanGal1;chrAsi1	2	cavPor3;octDeg1	2
KIF2B	0.0905616	0.729635		4	33	1	hetGla2	2	calJac3;orcOrc1	1
ARHGAP17	0.0905368	0.729635		5	34	0	NA	0	NA	0
GPR83	0.0905282	0.729635		4	32	0	NA	0	NA	0
IMP3	0.0907723	0.730886		5	40	1	myoDav1	0	NA	1
PUS1	0.0910491	0.732667		6	39	0	NA	0	NA	0
CRISP1	0.0913574	0.734701		6	38	1	hetGla2	3	cavPor3;octDeg1;pteAle1	1
ZNF449	0.0916074	0.735814		5	34	1	myoLuc2	1	odoRosDiv1	1
CD74	0.0915969	0.735814		6	42	0	NA	0	NA	0
FYTTD1	0.0918023	0.736931		5	39	0	NA	0	NA	0
AL049794.1	0.0929696	0.737541		5	38	5	nanGal1;hetGla2;myoDav1;myoLuc2;conCri1	26	calJac3;speTri2;micOch1;perManBai1;mm10;rn6;cavPor3;octDeg1;oryCun2;turTru2;orcOrc1;balAcu1;panHod1;bosTau8;bisBis1;capHir1;equCab2;cerSim1;felCat8;canFam3;musFur1;odoRosDiv1;lepWed1;pteAle1;pteVam1;eptFus1	4
FAM71C	0.0922517	0.737541		6	40	4	nanGal1;hetGla2;myoDav1;myoLuc2	13	micOch1;perManBai1;mm10;rn6;octDeg1;vicPac2;camFer1;balAcu1;bosTau8;bisBis1;equCab2;cerSim1;eptFus1	3
IQCF1	0.0931447	0.737541		5	39	2	nanGal1;hetGla2	2	calJac3;capHir1	2
SMIM10	0.0926102	0.737541		5	34	2	nanGal1;myoLuc2	5	calJac3;saiBol1;cavPor3;octDeg1;oryCun2	2
CDRT4	0.0929061	0.737541		6	40	1	hetGla2	1	camFer1	1
E2F2	0.0932194	0.737541		6	41	2	myoDav1;myoLuc2	18	otoGar3;vicPac2;camFer1;turTru2;orcOrc1;balAcu1;panHod1;bosTau8;bisBis1;capHir1;equCab2;felCat8;canFam3;odoRosDiv1;lepWed1;pteAle1;loxAfr3;triMan1	1
KCNE4	0.092638	0.737541		6	40	1	myoLuc2	0	NA	1
KLC1	0.0927547	0.737541		5	40	1	myoDav1	0	NA	1
LMNTD2	0.0934486	0.737541		3	32	1	nanGal1	5	panHod1;capHir1;equCab2;eptFus1;loxAfr3	1
PRG2	0.0928123	0.737541		3	37	1	hetGla2	6	turTru2;orcOrc1;panHod1;bosTau8;capHir1;equCab2	1
TM4SF5	0.0931737	0.737541		5	39	1	nanGal1	1	pteAle1	1
ZNF250	0.0932878	0.737541		3	29	1	chrAsi1	1	capHir1	1
ADAD2	0.0923394	0.737541		5	38	0	NA	1	bisBis1	0
C14orf2	0.0929906	0.737541		6	41	0	NA	0	NA	0
C2orf70	0.093119	0.737541		6	41	0	NA	2	turTru2;orcOrc1	0
CEP57	0.0926872	0.737541		5	40	0	NA	0	NA	0
CPSF2	0.0927745	0.737541		5	40	0	NA	0	NA	0
EXOC3L2	0.0926525	0.737541		5	28	0	NA	0	NA	0
GRHPR	0.093209	0.737541		6	40	0	NA	0	NA	0
MRPS22	0.0934897	0.737541		5	39	0	NA	0	NA	0
MS4A2	0.092536	0.737541		6	39	0	NA	0	NA	0
MYRIP	0.0932653	0.737541		6	36	0	NA	0	NA	0
PLA2G4F	0.093499	0.737541		5	40	0	NA	1	calJac3	0
PPWD1	0.0933565	0.737541		5	39	0	NA	0	NA	0
RNF103	0.0931548	0.737541		6	38	0	NA	0	NA	0
SLC30A3	0.0922791	0.737541		6	42	0	NA	0	NA	0
SRP14	0.0921664	0.737541		5	40	0	NA	0	NA	0
WAPAL	0.0922036	0.737541		6	37	0	NA	0	NA	0
ZSCAN10	0.0927491	0.737541		4	36	0	NA	0	NA	0
KAAG1	0.0938374	0.739326		5	38	2	myoLuc2;chrAsi1	6	saiBol1;vicPac2;camFer1;turTru2;orcOrc1;balAcu1	2
NR1I3	0.0938236	0.739326		6	42	2	myoDav1;conCri1	4	turTru2;orcOrc1;balAcu1;eptFus1	2
ASCL4	0.0939685	0.739918		4	34	1	hetGla2	0	NA	1
PILRB	0.0943485	0.741141		4	27	1	nanGal1	1	perManBai1	1
SENP2	0.0943096	0.741141		6	38	1	chrAsi1	0	NA	1
STAG3L5P_PVRIG2P_PILRB	0.0943485	0.741141		4	27	1	nanGal1	1	perManBai1	1
SERGEF	0.0942735	0.741141		6	37	0	NA	0	NA	0
ABCC11	0.0944253	0.741303		3	36	3	nanGal1;hetGla2;myoDav1	10	speTri2;perManBai1;mm10;rn6;cavPor3;octDeg1;vicPac2;orcOrc1;balAcu1;pteAle1	3
CCDC115	0.0949017	0.744158		5	38	0	NA	0	NA	0
CCDC160	0.0949016	0.744158		5	37	0	NA	0	NA	0
ZHX1_C8orf76	0.0950546	0.744915		6	37	0	NA	0	NA	0
FLOT1	0.0952929	0.746339		6	41	0	NA	0	NA	0
RPAP2	0.0954145	0.746847		5	39	1	myoDav1	0	NA	1
CLEC19A	0.0957596	0.747775		6	41	2	hetGla2;conCri1	6	mm10;rn6;cavPor3;octDeg1;ochPri3;pteVam1	2
COPB2	0.0957113	0.747775		4	36	0	NA	1	rn6	0
DPH5	0.0957293	0.747775		6	40	0	NA	0	NA	0
SAG	0.0956366	0.747775		6	36	0	NA	0	NA	0
UTS2B	0.0958982	0.747972		6	40	1	conCri1	3	calJac3;saiBol1;pteAle1	1
PGAP1	0.0958824	0.747972		4	33	0	NA	0	NA	0
CCT5	0.095958	0.747997		5	37	0	NA	0	NA	0
DOK6	0.0960799	0.748025		5	38	1	myoDav1	0	NA	1
EIF3D	0.0960206	0.748025		5	38	0	NA	0	NA	0
OCA2	0.0961884	0.748025		5	27	0	NA	0	NA	0
TRPC4AP	0.0961422	0.748025		5	38	0	NA	0	NA	0
MRAP	0.0964983	0.749746		4	40	1	conCri1	4	felCat8;canFam3;musFur1;lepWed1	1
MON1A	0.0965234	0.749746		5	41	0	NA	0	NA	0
CAPN1	0.0967928	0.749849		4	35	1	myoDav1	1	capHir1	1
TRIM22	0.0968751	0.749849		4	29	1	nanGal1	5	mm10;panHod1;bosTau8;cerSim1;felCat8	1
ACSM1	0.0966567	0.749849		5	24	0	NA	0	NA	0
NOTCH3	0.0967518	0.749849		5	30	0	NA	1	bisBis1	0
RP11_432B6.3	0.0968775	0.749849		6	37	0	NA	0	NA	0
SH3BGR	0.0967794	0.749849		4	36	0	NA	0	NA	0
RP11_38C17.1	0.0969412	0.749902		5	37	1	myoDav1	0	NA	1
CSN1S1	0.0970497	0.750302		5	37	3	hetGla2;myoDav1;myoLuc2	5	calJac3;saiBol1;mm10;panHod1;bosTau8	2
LRRC23	0.0972701	0.751565		6	40	0	NA	0	NA	0
NFE2L1	0.0975805	0.753523		6	41	0	NA	0	NA	0
NFATC3	0.0977224	0.753736		5	36	0	NA	0	NA	0
P2RX5	0.0977148	0.753736		5	38	0	NA	0	NA	0
CLDND2	0.0985567	0.754082		4	36	1	hetGla2	3	tarSyr2;vicPac2;musFur1	1
FAM180B	0.0982788	0.754082		6	42	1	conCri1	4	micOch1;perManBai1;mm10;rn6	1
NXF3	0.0979313	0.754082		4	27	1	myoDav1	4	panHod1;felCat8;canFam3;odoRosDiv1	1
S100A6	0.0978705	0.754082		6	41	1	hetGla2	5	panHod1;bosTau8;bisBis1;capHir1;pteVam1	1
VWA9	0.0987386	0.754082		6	42	1	myoDav1	0	NA	1
WDR55	0.0987386	0.754082		6	42	1	myoDav1	0	NA	1
ACADS	0.0982192	0.754082		6	39	0	NA	0	NA	0
ALG11	0.0987386	0.754082		6	42	0	NA	0	NA	0
BCCIP	0.0982962	0.754082		6	41	0	NA	0	NA	0
FAM71E1	0.0985373	0.754082		4	37	0	NA	0	NA	0
SLC34A2	0.0980382	0.754082		5	38	0	NA	0	NA	0
SPO11	0.098202	0.754082		6	40	0	NA	0	NA	0
TM4SF19	0.0987386	0.754082		6	42	0	NA	0	NA	0
TM4SF19_TCTEX1D2	0.0987386	0.754082		6	42	0	NA	0	NA	0
TMEM184B	0.0981789	0.754082		5	38	0	NA	0	NA	0
TMEM216	0.0987386	0.754082		6	42	0	NA	0	NA	0
ZBTB38	0.0981256	0.754082		6	37	0	NA	0	NA	0
ZNF432	0.0988514	0.754507		6	29	2	hetGla2;conCri1	3	mm10;loxAfr3;triMan1	2
HYPM	0.0998489	0.75747		5	33	2	hetGla2;myoLuc2	6	octDeg1;turTru2;panHod1;bosTau8;capHir1;loxAfr3	2
POM121L2	0.100202	0.75747		5	39	2	hetGla2;chrAsi1	10	tarSyr2;otoGar3;micOch1;perManBai1;mm10;rn6;turTru2;orcOrc1;balAcu1;canFam3	2
AGMO	0.10061	0.75747		5	35	1	hetGla2	2	cavPor3;octDeg1	1
AKAP9	0.0994201	0.75747		4	31	1	myoDav1	0	NA	1
BRD4	0.0997864	0.75747		4	22	1	myoDav1	1	rhiRox1	1
CPT2	0.101306	0.75747		6	41	1	myoDav1	0	NA	1
MRPL30	0.0996749	0.75747		5	37	1	myoDav1	0	NA	1
SHC4	0.0995197	0.75747		6	37	1	myoDav1	0	NA	1
SLC7A6OS	0.101237	0.75747		6	41	1	myoDav1	0	NA	1
YTHDC1	0.101155	0.75747		5	31	1	myoDav1	0	NA	1
ZKSCAN1	0.101306	0.75747		6	41	1	myoDav1	0	NA	1
AMIGO1	0.101306	0.75747		6	41	0	NA	0	NA	0
ATP6V0E2	0.100991	0.75747		5	37	0	NA	0	NA	0
ATP6V1C1	0.100917	0.75747		6	40	0	NA	0	NA	0
C21orf91	0.100865	0.75747		6	40	0	NA	0	NA	0
CEPT1	0.101237	0.75747		6	41	0	NA	0	NA	0
CPEB4	0.101238	0.75747		6	41	0	NA	0	NA	0
CRTAP	0.100176	0.75747		5	27	0	NA	1	chlSab2	0
CWF19L1	0.101164	0.75747		6	41	0	NA	0	NA	0
HRH1	0.100865	0.75747		6	40	0	NA	0	NA	0
LCK	0.100967	0.75747		5	37	0	NA	0	NA	0
LIN7B	0.100096	0.75747		4	35	0	NA	0	NA	0
MEF2BNB	0.100994	0.75747		6	41	0	NA	0	NA	0
MRPL50	0.101133	0.75747		6	41	0	NA	0	NA	0
MUM1L1	0.100362	0.75747		5	34	0	NA	0	NA	0
PEX6	0.0994382	0.75747		5	31	0	NA	0	NA	0
PIGC	0.101306	0.75747		6	41	0	NA	0	NA	0
POLR1D	0.101306	0.75747		6	41	0	NA	0	NA	0
SGSH	0.101153	0.75747		4	35	0	NA	0	NA	0
SSUH2	0.100735	0.75747		6	37	0	NA	1	calJac3	0
TIPRL	0.101238	0.75747		6	41	0	NA	0	NA	0
TPP1	0.0997065	0.75747		6	41	0	NA	0	NA	0
TXN	0.101237	0.75747		6	41	0	NA	0	NA	0
UHRF1BP1	0.100987	0.75747		6	39	0	NA	0	NA	0
VPS11	0.100848	0.75747		6	40	0	NA	0	NA	0
ZFYVE27	0.0999286	0.75747		6	41	0	NA	0	NA	0
ZNF491	0.102923	0.757589		5	29	4	nanGal1;hetGla2;myoLuc2;conCri1	18	panTro4;rheMac3;papAnu2;chlSab2;rhiRox1;calJac3;speTri2;perManBai1;mm10;rn6;octDeg1;turTru2;equCab2;cerSim1;felCat8;canFam3;odoRosDiv1;pteVam1	4
TIGD7	0.102573	0.757589		4	40	3	nanGal1;hetGla2;myoLuc2	8	micOch1;perManBai1;mm10;rn6;cavPor3;octDeg1;oryCun2;loxAfr3	3
ZNF19	0.102143	0.757589		5	38	3	hetGla2;conCri1;chrAsi1	7	saiBol1;mm10;rn6;octDeg1;ochPri3;camFer1;lepWed1	3
ALMS1	0.102104	0.757589		3	29	2	hetGla2;myoDav1	17	chlSab2;otoGar3;micOch1;perManBai1;mm10;rn6;cavPor3;octDeg1;ochPri3;camFer1;orcOrc1;panHod1;bosTau8;bisBis1;capHir1;equCab2;pteAle1	2
CD1E	0.103285	0.757589		5	33	2	conCri1;chrAsi1	2	tarSyr2;camFer1	2
LCE2A	0.103745	0.757589		4	29	2	conCri1;chrAsi1	0	NA	2
CMTM1	0.101809	0.757589		5	35	1	hetGla2	1	octDeg1	1
G0S2	0.102388	0.757589		5	35	1	myoDav1	0	NA	1
HSPA1L	0.103879	0.757589		6	40	1	myoDav1	0	NA	1
KATNBL1	0.103811	0.757589		6	40	1	myoDav1	0	NA	1
METTL18	0.101599	0.757589		6	41	1	myoDav1	0	NA	1
NPHP3	0.103879	0.757589		5	38	1	nanGal1	0	NA	1
NUDT21	0.102175	0.757589		6	41	1	myoDav1	0	NA	1
OVCH2	0.102009	0.757589		4	37	1	nanGal1	4	calJac3;saiBol1;otoGar3;orcOrc1	1
SH2D1B	0.102661	0.757589		4	39	1	myoDav1	1	eptFus1	1
SRSF7	0.103737	0.757589		6	40	1	myoDav1	0	NA	1
AAGAB	0.102891	0.757589		6	39	0	NA	0	NA	0
AHSA1	0.103881	0.757589		6	40	0	NA	0	NA	0
ARHGAP30	0.103811	0.757589		6	40	0	NA	0	NA	0
AZI2	0.1039	0.757589		6	40	0	NA	0	NA	0
CALCB	0.10388	0.757589		6	40	0	NA	0	NA	0
CASP6	0.10215	0.757589		4	37	0	NA	0	NA	0
CCSER2	0.103514	0.757589		6	39	0	NA	0	NA	0
CD226	0.103159	0.757589		6	37	0	NA	0	NA	0
COQ7	0.103604	0.757589		6	40	0	NA	0	NA	0
CSN3	0.103428	0.757589		6	40	0	NA	0	NA	0
ELOVL6	0.103811	0.757589		6	40	0	NA	0	NA	0
FAM135B	0.103461	0.757589		5	32	0	NA	0	NA	0
FHL1	0.103963	0.757589		6	40	0	NA	0	NA	0
FOXRED1	0.103811	0.757589		6	40	0	NA	0	NA	0
FRMD6	0.103879	0.757589		6	40	0	NA	0	NA	0
KCNK4	0.101771	0.757589		5	30	0	NA	0	NA	0
MRPL11	0.103775	0.757589		6	40	0	NA	0	NA	0
NEURL2	0.103567	0.757589		6	40	0	NA	0	NA	0
PCYOX1	0.103806	0.757589		6	40	0	NA	0	NA	0
PI4KB	0.102732	0.757589		5	39	0	NA	0	NA	0
PRDX2	0.102217	0.757589		6	40	0	NA	0	NA	0
PSME1	0.103962	0.757589		6	40	0	NA	0	NA	0
RAB8A	0.103481	0.757589		6	40	0	NA	0	NA	0
RIBC1	0.102215	0.757589		6	38	0	NA	0	NA	0
SH2D3C	0.103538	0.757589		6	40	0	NA	0	NA	0
TAF11	0.103775	0.757589		6	40	0	NA	0	NA	0
TMEM171	0.103785	0.757589		6	40	0	NA	0	NA	0
TRBC2	0.102726	0.757589		4	27	0	NA	3	camFer1;musFur1;lepWed1	0
UQCRQ	0.102545	0.757589		6	41	0	NA	0	NA	0
WBSCR28	0.102693	0.757589		6	37	0	NA	0	NA	0
FBN3	0.104085	0.757935		6	32	5	nanGal1;hetGla2;myoDav1;myoLuc2;conCri1	7	micOch1;perManBai1;mm10;rn6;cavPor3;ochPri3;eptFus1	4
DRGX	0.104125	0.757935		6	41	1	myoDav1	0	NA	1
APOF	0.104383	0.759396		6	42	0	NA	0	NA	0
CHRNA6	0.104539	0.760111		5	42	1	hetGla2	0	NA	1
PHOSPHO1	0.10468	0.760425		6	39	1	myoDav1	0	NA	1
PQLC1	0.104697	0.760425		5	35	0	NA	0	NA	0
IFNE	0.105214	0.761467		5	37	2	hetGla2;conCri1	3	calJac3;cavPor3;musFur1	2
SPRR1A	0.106112	0.761467		6	39	2	conCri1;chrAsi1	2	octDeg1;musFur1	2
CAP1	0.10709	0.761467		5	38	1	nanGal1	0	NA	1
CEACAM8	0.107362	0.761467		3	23	1	hetGla2	5	speTri2;panHod1;bisBis1;capHir1;loxAfr3	1
CNOT3	0.107126	0.761467		4	33	1	conCri1	2	turTru2;orcOrc1	1
GDPGP1	0.106632	0.761467		6	40	1	myoDav1	0	NA	1
GTF2A1	0.106456	0.761467		6	39	1	myoDav1	0	NA	1
HEXIM2	0.105923	0.761467		6	41	1	hetGla2	2	cavPor3;octDeg1	1
KCP	0.1069	0.761467		5	32	1	hetGla2	1	rhiRox1	1
KIAA0319	0.106783	0.761467		3	30	1	myoLuc2	5	speTri2;felCat8;musFur1;eptFus1;triMan1	1
LRRN4	0.107356	0.761467		4	29	1	hetGla2	1	turTru2	1
LYAR	0.106385	0.761467		6	39	1	myoDav1	0	NA	1
MAK16	0.105508	0.761467		6	38	1	myoDav1	0	NA	1
MCMBP	0.106462	0.761467		6	39	1	myoDav1	0	NA	1
PIP5K1A	0.10572	0.761467		6	38	1	myoDav1	0	NA	1
RPL18	0.105893	0.761467		6	38	1	myoDav1	0	NA	1
SLC35G6	0.107021	0.761467		5	39	1	myoLuc2	2	vicPac2;eptFus1	1
SRP9	0.10626	0.761467		6	38	1	myoDav1	0	NA	1
TMEM179B	0.107282	0.761467		6	41	1	hetGla2	1	octDeg1	1
TTC33	0.106426	0.761467		6	39	1	myoDav1	0	NA	1
UBE3D	0.106502	0.761467		4	38	1	hetGla2	5	speTri2;micOch1;perManBai1;mm10;oryCun2	1
C5orf49	0.106174	0.761467		4	26	0	NA	0	NA	0
CCKBR	0.106538	0.761467		6	39	0	NA	0	NA	0
CDKL1	0.106687	0.761467		6	39	0	NA	0	NA	0
CNGA4	0.107275	0.761467		6	39	0	NA	2	turTru2;orcOrc1	0
DLK2	0.106214	0.761467		6	39	0	NA	0	NA	0
EHMT1	0.10666	0.761467		3	34	0	NA	0	NA	0
EMC3	0.106388	0.761467		6	39	0	NA	0	NA	0
FAM78A	0.10509	0.761467		6	41	0	NA	0	NA	0
FZD4	0.106562	0.761467		6	39	0	NA	0	NA	0
HDAC11	0.107123	0.761467		6	38	0	NA	0	NA	0
HIST1H2AB	0.106558	0.761467		6	39	0	NA	0	NA	0
IFNAR1	0.106663	0.761467		6	39	0	NA	1	felCat8	0
ITGB8	0.106532	0.761467		6	39	0	NA	0	NA	0
KLF3	0.106473	0.761467		6	39	0	NA	0	NA	0
LY6G5B	0.107215	0.761467		6	42	0	NA	2	micOch1;perManBai1	0
MAP10	0.10692	0.761467		5	31	0	NA	4	rn6;octDeg1;oryCun2;orcOrc1	0
MSRB3	0.10655	0.761467		6	39	0	NA	0	NA	0
NAMPT	0.10653	0.761467		6	39	0	NA	0	NA	0
NR0B2	0.106533	0.761467		6	39	0	NA	0	NA	0
RAB5C	0.10738	0.761467		6	38	0	NA	0	NA	0
SLC25A15	0.105612	0.761467		4	35	0	NA	1	tarSyr2	0
TMEM150A	0.106534	0.761467		6	39	0	NA	0	NA	0
TOX	0.106172	0.761467		6	38	0	NA	0	NA	0
TJP1	0.107463	0.761649		4	32	0	NA	0	NA	0
PLA2G2C	0.107544	0.76181		5	41	2	hetGla2;conCri1	6	calJac3;saiBol1;speTri2;turTru2;felCat8;lepWed1	2
FAM171B	0.107761	0.762534		5	37	1	myoDav1	1	micOch1	1
AKAP2	0.107726	0.762534		6	37	0	NA	0	NA	0
EML4	0.107981	0.76327		6	40	0	NA	0	NA	0
NR6A1	0.107971	0.76327		6	39	0	NA	0	NA	0
CCDC116	0.108588	0.763314		5	37	2	hetGla2;myoDav1	0	NA	2
MRGPRX2	0.108547	0.763314		5	39	2	hetGla2;conCri1	5	speTri2;cavPor3;orcOrc1;balAcu1;triMan1	2
HEATR4	0.109106	0.763314		6	37	1	nanGal1	0	NA	1
PDSS2	0.10809	0.763314		5	33	1	myoDav1	0	NA	1
SEZ6L2	0.108987	0.763314		6	37	1	myoDav1	0	NA	1
TESC	0.109017	0.763314		6	38	1	myoDav1	0	NA	1
ADAMTS6	0.109314	0.763314		6	34	0	NA	0	NA	0
BCL2L15	0.109268	0.763314		6	41	0	NA	0	NA	0
CCDC69	0.108611	0.763314		5	38	0	NA	0	NA	0
CDS2	0.109263	0.763314		6	38	0	NA	0	NA	0
FCF1	0.109042	0.763314		6	38	0	NA	0	NA	0
LRTOMT	0.108882	0.763314		6	40	0	NA	0	NA	0
MAPKAP1	0.109159	0.763314		6	38	0	NA	0	NA	0
METAP2	0.108196	0.763314		6	38	0	NA	0	NA	0
NR4A2	0.109176	0.763314		6	38	0	NA	0	NA	0
PIGR	0.108555	0.763314		6	41	0	NA	0	NA	0
PSMC6	0.109048	0.763314		6	38	0	NA	0	NA	0
SF1	0.108967	0.763314		6	37	0	NA	0	NA	0
STK40	0.109189	0.763314		6	38	0	NA	0	NA	0
TMEM26	0.108606	0.763314		5	32	0	NA	0	NA	0
TSGA10IP	0.108201	0.763314		6	37	0	NA	1	camFer1	0
VARS2	0.108534	0.763314		4	37	0	NA	0	NA	0
WDR1	0.109318	0.763314		5	37	0	NA	0	NA	0
ANGPTL2	0.109518	0.763792		5	35	1	myoDav1	0	NA	1
DNASE2B	0.109584	0.763792		6	40	1	myoDav1	0	NA	1
SLC2A1	0.109521	0.763792		6	38	1	myoDav1	0	NA	1
FOXD4	0.109618	0.763792		5	28	0	NA	0	NA	0
C17orf85	0.1102	0.764578		6	37	1	myoDav1	0	NA	1
IGSF3	0.110363	0.764578		5	37	1	myoDav1	0	NA	1
IQCC	0.11022	0.764578		6	41	1	hetGla2	2	papAnu2;tarSyr2	1
TNFRSF14	0.110282	0.764578		3	31	1	hetGla2	7	vicPac2;camFer1;turTru2;orcOrc1;panHod1;bosTau8;bisBis1	1
ATP1A2	0.110001	0.764578		6	39	0	NA	0	NA	0
CLUL1	0.110285	0.764578		6	36	0	NA	0	NA	0
FAM102B	0.110368	0.764578		6	37	0	NA	0	NA	0
HOXA1	0.109992	0.764578		6	38	0	NA	0	NA	0
OXTR	0.110358	0.764578		5	34	0	NA	0	NA	0
PTGFRN	0.110321	0.764578		5	33	0	NA	0	NA	0
RCOR2	0.109809	0.764578		6	39	0	NA	0	NA	0
CACNA1H	0.110548	0.764626		4	29	1	myoDav1	2	turTru2;bosTau8	1
DOK2	0.110476	0.764626		6	37	1	myoDav1	0	NA	1
SOCS2	0.110514	0.764626		6	37	0	NA	0	NA	0
MAGEB18	0.111549	0.765394		6	36	2	nanGal1;hetGla2	3	cavPor3;octDeg1;triMan1	2
BMP4	0.112266	0.765394		6	37	1	myoDav1	0	NA	1
DEFB106B	0.112245	0.765394		4	37	2	myoDav1;myoLuc2	1	cerSim1	1
LPCAT2	0.112283	0.765394		6	33	1	myoDav1	0	NA	1
NOTCH2	0.111515	0.765394		5	36	1	myoLuc2	1	capHir1	1
SLX1A_SULT1A3	0.112199	0.765394		5	36	1	nanGal1	2	rhiRox1;tarSyr2	1
SORT1	0.111456	0.765394		6	37	1	myoDav1	0	NA	1
SULT1A3	0.111271	0.765394		5	36	1	nanGal1	2	rhiRox1;tarSyr2	1
TLN1	0.111251	0.765394		5	38	1	myoDav1	2	balAcu1;pteAle1	1
COPA	0.112023	0.765394		6	36	0	NA	0	NA	0
CYTH1	0.110831	0.765394		5	38	0	NA	0	NA	0
HIPK4	0.111974	0.765394		5	37	0	NA	0	NA	0
HSCB	0.111775	0.765394		6	37	0	NA	0	NA	0
KCTD16	0.112056	0.765394		6	37	0	NA	0	NA	0
KY	0.112005	0.765394		6	37	0	NA	0	NA	0
LARP1	0.11224	0.765394		4	38	0	NA	0	NA	0
OXA1L	0.111824	0.765394		6	38	0	NA	0	NA	0
PCDHGA3	0.110991	0.765394		5	36	0	NA	0	NA	0
PPCS	0.112107	0.765394		6	37	0	NA	0	NA	0
PRDX1	0.111782	0.765394		6	37	0	NA	0	NA	0
PTPN1	0.110727	0.765394		6	41	0	NA	0	NA	0
RPS3A	0.112161	0.765394		4	39	0	NA	0	NA	0
SBK2	0.111316	0.765394		4	32	0	NA	0	NA	0
SLC25A41	0.111805	0.765394		5	35	0	NA	4	calJac3;turTru2;orcOrc1;odoRosDiv1	0
SNPH	0.112006	0.765394		6	37	0	NA	0	NA	0
SPACA3	0.110837	0.765394		6	37	0	NA	0	NA	0
WEE1	0.112173	0.765394		3	24	0	NA	1	oryCun2	0
ZNF235	0.111537	0.765394		5	37	0	NA	0	NA	0
XPNPEP1	0.112427	0.765977		6	37	0	NA	0	NA	0
CFC1	0.112618	0.766885		4	33	0	NA	0	NA	0
AURKB	0.112896	0.767128		6	38	1	myoDav1	0	NA	1
DGCR6L	0.11307	0.767128		5	36	1	chrAsi1	0	NA	1
FIG4	0.113165	0.767128		4	36	1	hetGla2	1	octDeg1	1
KRTAP11_1	0.11321	0.767128		5	39	1	myoDav1	0	NA	1
RFX8	0.113323	0.767128		6	37	1	hetGla2	3	panPan1;turTru2;orcOrc1	1
SMC1B	0.113468	0.767128		5	38	1	nanGal1	0	NA	1
ADPRH	0.113359	0.767128		5	41	0	NA	0	NA	0
BCL11A	0.113193	0.767128		6	37	0	NA	0	NA	0
COMMD1	0.113098	0.767128		5	38	0	NA	0	NA	0
GCOM1	0.113068	0.767128		6	36	0	NA	0	NA	0
PML	0.113464	0.767128		6	38	0	NA	0	NA	0
PRPSAP1	0.113424	0.767128		6	35	0	NA	0	NA	0
TEC	0.112995	0.767128		6	40	0	NA	0	NA	0
ZNF280D	0.113295	0.767128		6	36	0	NA	0	NA	0
IFIT5	0.11367	0.767346		5	36	1	hetGla2	2	octDeg1;ochPri3	1
RNF145	0.113669	0.767346		6	37	1	myoDav1	0	NA	1
HPD	0.113674	0.767346		6	39	0	NA	0	NA	0
DEFB106A	0.113913	0.768566		4	37	2	myoDav1;myoLuc2	1	cerSim1	1
KRTAP25_1	0.114154	0.769035		3	38	2	nanGal1;hetGla2	19	calJac3;saiBol1;tarSyr2;otoGar3;speTri2;micOch1;perManBai1;mm10;rn6;octDeg1;ochPri3;vicPac2;turTru2;orcOrc1;balAcu1;cerSim1;pteAle1;eptFus1;loxAfr3	2
CKMT1B	0.115148	0.769035		6	37	1	myoDav1	0	NA	1
COBL	0.114656	0.769035		4	35	1	hetGla2	1	vicPac2	1
GPCPD1	0.114708	0.769035		5	38	1	myoDav1	1	rhiRox1	1
AC007906.1	0.115068	0.769035		6	42	0	NA	0	NA	0
ALDH1A1	0.11473	0.769035		6	36	0	NA	0	NA	0
ARPC4	0.114552	0.769035		6	36	0	NA	0	NA	0
ATP5B	0.114754	0.769035		6	35	0	NA	0	NA	0
CHPF	0.115005	0.769035		6	36	0	NA	0	NA	0
CTDSPL	0.114679	0.769035		6	35	0	NA	0	NA	0
ERC1	0.114462	0.769035		5	32	0	NA	0	NA	0
FRYL	0.11496	0.769035		6	36	0	NA	0	NA	0
GNMT	0.114988	0.769035		6	36	0	NA	0	NA	0
KIAA1109	0.114421	0.769035		3	34	0	NA	0	NA	0
KIF20A	0.1151	0.769035		6	39	0	NA	0	NA	0
KLHL29	0.114992	0.769035		6	36	0	NA	0	NA	0
LRRN3	0.115147	0.769035		6	37	0	NA	0	NA	0
MAGI2	0.114769	0.769035		6	35	0	NA	0	NA	0
MTHFD1	0.114397	0.769035		5	37	0	NA	0	NA	0
RHOT1	0.114921	0.769035		6	35	0	NA	0	NA	0
OTUD4	0.115278	0.769488		5	38	0	NA	0	NA	0
TMEM56_RWDD3	0.115333	0.769488		4	39	0	NA	0	NA	0
C2orf78	0.11549	0.76955		3	34	2	hetGla2;myoLuc2	9	calJac3;tarSyr2;speTri2;mm10;rn6;cavPor3;octDeg1;ochPri3;orcOrc1	2
CBLN2	0.115517	0.76955		4	28	0	NA	0	NA	0
ZRSR2	0.115489	0.76955		6	36	0	NA	0	NA	0
SAA2	0.11602	0.771284		5	31	2	hetGla2;conCri1	4	ponAbe2;perManBai1;cavPor3;vicPac2	2
CDC42EP4	0.11607	0.771284		6	35	0	NA	0	NA	0
MYZAP	0.116039	0.771284		6	35	0	NA	0	NA	0
RGS4	0.115994	0.771284		6	36	0	NA	0	NA	0
WDR48	0.11585	0.771284		6	35	0	NA	0	NA	0
CPNE7	0.116131	0.771304		4	34	2	hetGla2;conCri1	6	oryCun2;ochPri3;vicPac2;orcOrc1;balAcu1;pteAle1	2
SH2B1	0.116216	0.771478		6	36	1	myoDav1	0	NA	1
LDLRAD2	0.116412	0.771619		5	33	2	myoDav1;chrAsi1	3	orcOrc1;eptFus1;triMan1	2
KCTD18	0.116298	0.771619		6	36	1	hetGla2	1	pteAle1	1
DDHD2	0.116388	0.771619		6	35	0	NA	0	NA	0
FAM49B	0.116566	0.771974		6	41	0	NA	0	NA	0
SGOL1	0.116583	0.771974		6	36	0	NA	0	NA	0
CCL15	0.117131	0.774051		4	41	1	nanGal1	2	ochPri3;orcOrc1	1
CCL15_CCL14	0.117131	0.774051		4	41	1	nanGal1	2	ochPri3;orcOrc1	1
PLEKHH2	0.11698	0.774051		6	34	1	myoDav1	0	NA	1
[truncated: 11,201 more rows]
