# Supplementary material for: Vision-related convergent gene losses reveal SERPINE3’s unknown role in the eye
Source: eLife. 2022 Jun 21;11:e77999. doi: 10.7554/eLife.77999 (PMC9355568; doi:10.7554/eLife.77999)
Supplement: Figure 1—source data 7. [file elife-77999-fig1-data7.xls]

## Sheet: Figure 1 - Source data 7
Figure 1 - Source data 7: List of candidate genes of the forward genomics screen based on the molecular loss signature of known vision genes
The screen was rerun by defining trait-loss species as the 5 species that had lost most known vision genes with otherwise identical conditions. With the final filtering settings (column L), we retrieve 31 genes, of which 14 are shared with the final candidate gene set with visual acuity <1.
Of the genes passing our filters, SERPINE3 is 5th-ranked.
Gene symbol	P-value in Forward Genomics screen	Corrected P-value	Filter: P-value in Forward Genomics screen < 0.05	#Trait-loss species	#Trait-preserving species	#Losses in trait-loss species	Trait-loss species that have lost the gene	#Losses in trait-preserving species	Trait-preserving species with losses	#Losses in trait-loss lineages	Filter: Loss > 2 trait-loss lineages
DKK4	1.52962e-09	7.61192e-06	YES	10	38	3	eptFus1;myoDav1;myoLuc2	0	NA	1	NO
ZNF131	1.97617e-09	7.61192e-06	YES	9	32	0	NA	0	NA	0	NO
MMAA	3.54827e-09	7.61192e-06	YES	9	36	0	NA	0	NA	0	NO
F10	6.9433e-09	7.61192e-06	YES	5	33	0	NA	0	NA	0	NO
GINS3	8.05235e-09	7.61192e-06	YES	9	36	0	NA	0	NA	0	NO
CLCN6	8.29521e-09	7.61192e-06	YES	8	37	0	NA	0	NA	0	NO
RP11_411B6,6	8.4561e-09	7.61192e-06	YES	10	35	0	NA	0	NA	0	NO
SLC16A13	8.8035e-09	7.61192e-06	YES	10	38	0	NA	0	NA	0	NO
MRPL35	8.91302e-09	7.61192e-06	YES	8	37	0	NA	0	NA	0	NO
TARBP2	9.53503e-09	7.61192e-06	YES	8	35	0	NA	0	NA	0	NO
SYT11	9.77264e-09	7.61192e-06	YES	10	36	0	NA	0	NA	0	NO
FNDC9	1.06723e-08	7.61192e-06	YES	9	38	0	NA	0	NA	0	NO
PLEKHN1	1.25045e-08	7.61192e-06	YES	8	29	1	capHir1	0	NA	1	NO
B3GAT3	1.36696e-08	7.61192e-06	YES	10	35	1	capHir1	0	NA	1	NO
FAM107A	1.3839e-08	7.61192e-06	YES	9	36	0	NA	0	NA	0	NO
ISLR	1.43583e-08	7.61192e-06	YES	10	35	0	NA	0	NA	0	NO
ACO1	1.63135e-08	7.61192e-06	YES	7	31	0	NA	0	NA	0	NO
ARMC6	1.75773e-08	7.61192e-06	YES	9	35	0	NA	0	NA	0	NO
TGFB2	1.84154e-08	7.61192e-06	YES	9	37	0	NA	0	NA	0	NO
PHKG1	2.00248e-08	7.61192e-06	YES	8	35	0	NA	0	NA	0	NO
ANGPT2	2.01528e-08	7.61192e-06	YES	8	38	0	NA	0	NA	0	NO
CCL19	2.11004e-08	7.61192e-06	YES	9	37	0	NA	0	NA	0	NO
ZNF276	2.29661e-08	7.61192e-06	YES	8	36	0	NA	0	NA	0	NO
OPTC	2.30246e-08	7.61192e-06	YES	9	34	6	eptFus1;myoDav1;myoLuc2;conCri1;triMan1;chrAsi1	1	loxAfr3	3	YES
CTSH	2.35751e-08	7.61192e-06	YES	6	35	0	NA	0	NA	0	NO
GAST	2.36065e-08	7.61192e-06	YES	9	35	1	capHir1	0	NA	1	NO
C5AR1	2.4141e-08	7.61192e-06	YES	9	35	0	NA	0	NA	0	NO
LRRC28	2.61024e-08	7.61192e-06	YES	9	36	0	NA	0	NA	0	NO
SLC25A34	2.65666e-08	7.61192e-06	YES	8	33	2	nanGal1;capHir1	0	NA	2	NO
SIGLEC1	2.66516e-08	7.61192e-06	YES	9	35	0	NA	0	NA	0	NO
SMPD3	2.81508e-08	7.61192e-06	YES	10	34	1	capHir1	0	NA	1	NO
FAM187A	2.93177e-08	7.61192e-06	YES	10	38	0	NA	0	NA	0	NO
GLRX	2.93177e-08	7.61192e-06	YES	10	38	1	capHir1	0	NA	1	NO
UCP2	2.93177e-08	7.61192e-06	YES	10	38	1	capHir1	0	NA	1	NO
TLR3	2.93177e-08	7.61192e-06	YES	10	38	0	NA	0	NA	0	NO
KCTD11	2.93177e-08	7.61192e-06	YES	10	38	0	NA	0	NA	0	NO
IP6K1	2.93177e-08	7.61192e-06	YES	10	38	0	NA	0	NA	0	NO
SRI	2.93177e-08	7.61192e-06	YES	10	38	0	NA	0	NA	0	NO
SPIRE1	2.9331e-08	7.61192e-06	YES	8	35	0	NA	0	NA	0	NO
TRMU	3.03414e-08	7.61192e-06	YES	8	34	0	NA	0	NA	0	NO
NLE1	3.03503e-08	7.61192e-06	YES	9	36	1	capHir1	0	NA	1	NO
MPG	3.03706e-08	7.61192e-06	YES	9	36	0	NA	0	NA	0	NO
ZSWIM1	3.09512e-08	7.61192e-06	YES	10	36	0	NA	0	NA	0	NO
IPPK	3.11973e-08	7.61192e-06	YES	8	31	1	capHir1	0	NA	1	NO
ACTN2	3.14741e-08	7.61192e-06	YES	7	34	0	NA	0	NA	0	NO
NR1D2	3.16693e-08	7.61192e-06	YES	8	35	1	capHir1	0	NA	1	NO
STX3	3.23219e-08	7.61192e-06	YES	9	34	0	NA	0	NA	0	NO
DGCR6	3.26623e-08	7.61192e-06	YES	8	32	1	capHir1	0	NA	1	NO
RPLP0	3.33372e-08	7.61192e-06	YES	9	36	0	NA	0	NA	0	NO
PROSC	3.34764e-08	7.61192e-06	YES	10	35	0	NA	0	NA	0	NO
EMC9	3.38058e-08	7.61192e-06	YES	10	38	0	NA	0	NA	0	NO
VIMP	3.47173e-08	7.61192e-06	YES	7	35	0	NA	0	NA	0	NO
SDCBP2	3.55937e-08	7.61192e-06	YES	8	35	0	NA	0	NA	0	NO
TREML2	3.63265e-08	7.61192e-06	YES	6	36	0	NA	0	NA	0	NO
KRTAP2_1	3.65458e-08	7.61192e-06	YES	6	30	0	NA	0	NA	0	NO
IPO4	3.93011e-08	7.61192e-06	YES	10	35	0	NA	0	NA	0	NO
LRRC3C	3.97733e-08	7.61192e-06	YES	8	38	0	NA	0	NA	0	NO
EPM2AIP1	4.00228e-08	7.61192e-06	YES	10	36	0	NA	0	NA	0	NO
TMA7	4.02164e-08	7.61192e-06	YES	9	38	0	NA	0	NA	0	NO
NDUFAF3	4.02164e-08	7.61192e-06	YES	9	38	0	NA	0	NA	0	NO
C12orf57	4.06084e-08	7.61192e-06	YES	10	37	0	NA	0	NA	0	NO
KIAA0355	4.08997e-08	7.61192e-06	YES	10	37	0	NA	0	NA	0	NO
FEN1	4.09055e-08	7.61192e-06	YES	10	37	0	NA	0	NA	0	NO
NRROS	4.09177e-08	7.61192e-06	YES	10	37	0	NA	0	NA	0	NO
NABP2	4.09177e-08	7.61192e-06	YES	10	37	0	NA	0	NA	0	NO
SLC38A7	4.09181e-08	7.61192e-06	YES	10	37	0	NA	0	NA	0	NO
PPIL1	4.09241e-08	7.61192e-06	YES	10	37	0	NA	0	NA	0	NO
PAQR8	4.10131e-08	7.61192e-06	YES	10	36	1	capHir1	0	NA	1	NO
PREB	4.10328e-08	7.61192e-06	YES	10	37	0	NA	0	NA	0	NO
FFAR1	4.15964e-08	7.61192e-06	YES	9	33	1	capHir1	0	NA	1	NO
JMJD7_PLA2G4B	4.22644e-08	7.61192e-06	YES	9	33	0	NA	0	NA	0	NO
CSF3	4.26187e-08	7.61192e-06	YES	10	36	0	NA	0	NA	0	NO
TMEM201	4.33528e-08	7.61192e-06	YES	9	35	0	NA	0	NA	0	NO
CLEC3A	4.3588e-08	7.61192e-06	YES	10	37	0	NA	0	NA	0	NO
MFGE8	4.36228e-08	7.61192e-06	YES	7	36	0	NA	0	NA	0	NO
MPC2	4.53872e-08	7.61192e-06	YES	9	32	0	NA	0	NA	0	NO
IL34	4.55892e-08	7.61192e-06	YES	9	35	1	capHir1	0	NA	1	NO
MSH6	4.61514e-08	7.61192e-06	YES	10	37	0	NA	0	NA	0	NO
ITGA11	4.68861e-08	7.61192e-06	YES	7	31	0	NA	0	NA	0	NO
NOC2L	4.69909e-08	7.61192e-06	YES	8	30	0	NA	0	NA	0	NO
AQP1	4.71049e-08	7.61192e-06	YES	9	36	0	NA	0	NA	0	NO
PDZD3	4.73759e-08	7.61192e-06	YES	8	37	1	capHir1	0	NA	1	NO
SYT5	4.9933e-08	7.83363e-06	YES	9	35	1	capHir1	0	NA	1	NO
IGSF8	4.99449e-08	7.83363e-06	YES	10	32	0	NA	0	NA	0	NO
SNX7	5.11221e-08	7.83693e-06	YES	8	33	1	capHir1	0	NA	1	NO
PRR19	5.21459e-08	7.83693e-06	YES	10	36	0	NA	0	NA	0	NO
ITGA3	5.33644e-08	7.83693e-06	YES	10	35	1	capHir1	0	NA	1	NO
SQRDL	5.39187e-08	7.83693e-06	YES	10	34	0	NA	0	NA	0	NO
ALKBH7	5.47222e-08	7.83693e-06	YES	6	32	0	NA	0	NA	0	NO
FAIM2	5.56638e-08	7.83693e-06	YES	9	37	0	NA	0	NA	0	NO
LTA	5.61628e-08	7.83693e-06	YES	9	37	0	NA	0	NA	0	NO
SEC61B	5.65906e-08	7.83693e-06	YES	10	36	0	NA	0	NA	0	NO
SDR39U1	5.66073e-08	7.83693e-06	YES	10	36	0	NA	0	NA	0	NO
STK16	5.66079e-08	7.83693e-06	YES	10	36	0	NA	0	NA	0	NO
C6orf25	5.69722e-08	7.83693e-06	YES	10	36	0	NA	0	NA	0	NO
UFD1L	5.7104e-08	7.83693e-06	YES	10	36	0	NA	0	NA	0	NO
NMNAT3	5.89298e-08	7.93195e-06	YES	9	35	0	NA	0	NA	0	NO
CLP1	5.98403e-08	7.93195e-06	YES	10	37	0	NA	0	NA	0	NO
MMP3	6.0079e-08	7.93195e-06	YES	9	36	1	capHir1	0	NA	1	NO
BNC1	6.02045e-08	7.93195e-06	YES	7	36	0	NA	0	NA	0	NO
CCDC89	6.11684e-08	7.97915e-06	YES	10	35	0	NA	0	NA	0	NO
LDLRAD3	6.20179e-08	8.01064e-06	YES	10	36	1	capHir1	0	NA	1	NO
GPR37	6.51631e-08	8.18108e-06	YES	8	37	0	NA	0	NA	0	NO
OTX2	6.51803e-08	8.18108e-06	YES	8	37	0	NA	0	NA	0	NO
UQCRC1	6.52002e-08	8.18108e-06	YES	8	37	0	NA	0	NA	0	NO
PTCH2	6.60663e-08	8.21154e-06	YES	9	37	0	NA	0	NA	0	NO
SERINC5	7.06042e-08	8.63768e-06	YES	10	33	0	NA	0	NA	0	NO
ABCA6	7.09982e-08	8.63768e-06	YES	7	32	4	capHir1;eptFus1;myoDav1;myoLuc2	1	balAcu1	2	NO
KCNJ16	7.32365e-08	8.63768e-06	YES	10	34	0	NA	0	NA	0	NO
CEP97	7.32637e-08	8.63768e-06	YES	7	33	0	NA	0	NA	0	NO
ODF3L1	7.46029e-08	8.63768e-06	YES	10	35	1	hetGla2	0	NA	1	NO
HOXC5	7.51724e-08	8.63768e-06	YES	10	35	1	capHir1	0	NA	1	NO
GDAP1L1	7.56729e-08	8.63768e-06	YES	10	35	0	NA	0	NA	0	NO
SRRM2	7.65487e-08	8.63768e-06	YES	8	34	0	NA	0	NA	0	NO
PFKM	7.77559e-08	8.63768e-06	YES	9	36	1	capHir1	0	NA	1	NO
TMEFF2	7.77603e-08	8.63768e-06	YES	10	35	0	NA	0	NA	0	NO
COG4	7.80339e-08	8.63768e-06	YES	9	34	0	NA	0	NA	0	NO
AVPI1	7.89507e-08	8.63768e-06	YES	10	35	0	NA	0	NA	0	NO
CNTFR	7.90339e-08	8.63768e-06	YES	10	35	0	NA	0	NA	0	NO
ACVRL1	7.92666e-08	8.63768e-06	YES	10	35	1	capHir1	0	NA	1	NO
GATA3	7.93793e-08	8.63768e-06	YES	10	35	1	capHir1	0	NA	1	NO
ZBTB2	7.99846e-08	8.63768e-06	YES	10	35	1	capHir1	0	NA	1	NO
SLC9A8	8.5227e-08	9.12899e-06	YES	9	31	0	NA	0	NA	0	NO
FICD	8.77056e-08	9.18188e-06	YES	10	35	0	NA	0	NA	0	NO
BANP	8.80086e-08	9.18188e-06	YES	9	33	0	NA	0	NA	0	NO
RPUSD4	8.87888e-08	9.18188e-06	YES	10	36	0	NA	0	NA	0	NO
DLX3	8.88422e-08	9.18188e-06	YES	9	31	1	capHir1	0	NA	1	NO
C1orf52	8.92054e-08	9.18188e-06	YES	8	34	1	capHir1	0	NA	1	NO
PADI2	9.07814e-08	9.21548e-06	YES	7	33	1	capHir1	0	NA	1	NO
ZNF688	9.09307e-08	9.21548e-06	YES	8	36	0	NA	0	NA	0	NO
CTU2	9.43533e-08	9.48935e-06	YES	8	34	0	NA	0	NA	0	NO
TRIM50	9.69789e-08	9.67952e-06	YES	10	34	1	capHir1	0	NA	1	NO
BRF2	9.77614e-08	9.68426e-06	YES	9	35	1	capHir1	0	NA	1	NO
NETO2	1.04905e-07	1.02618e-05	YES	7	35	0	NA	0	NA	0	NO
KCNB2	1.05357e-07	1.02618e-05	YES	10	33	0	NA	0	NA	0	NO
C9orf41	1.07237e-07	1.02618e-05	YES	10	36	0	NA	0	NA	0	NO
KLF15	1.08902e-07	1.02618e-05	YES	10	34	1	capHir1	0	NA	1	NO
UBE2E3	1.09637e-07	1.02618e-05	YES	10	34	0	NA	0	NA	0	NO
TSC22D1	1.09765e-07	1.02618e-05	YES	10	34	0	NA	0	NA	0	NO
OIP5	1.09875e-07	1.02618e-05	YES	9	35	0	NA	0	NA	0	NO
EPS15L1	1.10388e-07	1.02618e-05	YES	10	34	0	NA	0	NA	0	NO
ACBD5	1.10602e-07	1.02618e-05	YES	10	31	0	NA	0	NA	0	NO
KLHL7	1.13327e-07	1.04148e-05	YES	10	34	0	NA	0	NA	0	NO
GJB3	1.14681e-07	1.04148e-05	YES	10	34	1	capHir1	0	NA	1	NO
SLC35F2	1.17201e-07	1.04148e-05	YES	9	35	0	NA	0	NA	0	NO
AGAP2	1.17461e-07	1.04148e-05	YES	8	33	0	NA	0	NA	0	NO
CXCR3	1.17729e-07	1.04148e-05	YES	10	34	0	NA	0	NA	0	NO
ZNF202	1.18009e-07	1.04148e-05	YES	10	34	0	NA	0	NA	0	NO
TRIM2	1.18444e-07	1.04148e-05	YES	10	34	1	capHir1	0	NA	1	NO
P2RX1	1.18575e-07	1.04148e-05	YES	10	34	0	NA	0	NA	0	NO
MEOX2	1.19615e-07	1.04366e-05	YES	9	34	1	capHir1	0	NA	1	NO
KIAA0513	1.25873e-07	1.07928e-05	YES	10	33	0	NA	0	NA	0	NO
ZFP91	1.25893e-07	1.07928e-05	YES	10	33	0	NA	0	NA	0	NO
RRP12	1.26155e-07	1.07928e-05	YES	9	32	0	NA	0	NA	0	NO
PIP4K2C	1.27165e-07	1.0809e-05	YES	10	34	0	NA	0	NA	0	NO
C16orf59	1.28421e-07	1.08458e-05	YES	9	36	0	NA	0	NA	0	NO
EPN2	1.34494e-07	1.12863e-05	YES	9	30	0	NA	0	NA	0	NO
CDYL	1.41047e-07	1.17614e-05	YES	9	32	0	NA	0	NA	0	NO
GZMB	1.45445e-07	1.20272e-05	YES	10	37	0	NA	0	NA	0	NO
LOXL3	1.46061e-07	1.20272e-05	YES	10	34	0	NA	0	NA	0	NO
CCKAR	1.49515e-07	1.22351e-05	YES	10	38	0	NA	0	NA	0	NO
FOXN1	1.60507e-07	1.30535e-05	YES	10	38	0	NA	0	NA	0	NO
CSTF2	1.70102e-07	1.36322e-05	YES	10	36	1	capHir1	0	NA	1	NO
SLC27A4	1.70158e-07	1.36322e-05	YES	10	33	0	NA	0	NA	0	NO
SORL1	1.70991e-07	1.36322e-05	YES	9	27	0	NA	0	NA	0	NO
ACSF3	1.7176e-07	1.36322e-05	YES	9	31	0	NA	0	NA	0	NO
TENM3	1.78513e-07	1.39996e-05	YES	8	31	0	NA	0	NA	0	NO
BAG4	1.79498e-07	1.39996e-05	YES	10	35	1	capHir1	0	NA	1	NO
TRADD	1.81004e-07	1.39996e-05	YES	10	34	1	capHir1	0	NA	1	NO
KRT80	1.81258e-07	1.39996e-05	YES	8	32	0	NA	0	NA	0	NO
EML3	1.81702e-07	1.39996e-05	YES	9	37	0	NA	0	NA	0	NO
RPS15	1.86453e-07	1.42821e-05	YES	9	33	0	NA	0	NA	0	NO
MAP4K4	1.88519e-07	1.43569e-05	YES	9	32	1	capHir1	0	NA	1	NO
CHST3	1.9024e-07	1.44047e-05	YES	9	34	1	capHir1	0	NA	1	NO
RBPJL	1.92715e-07	1.45087e-05	YES	10	34	0	NA	0	NA	0	NO
EPHB3	1.95128e-07	1.46069e-05	YES	9	31	0	NA	0	NA	0	NO
ADIPOR1	1.97289e-07	1.46194e-05	YES	10	35	1	capHir1	0	NA	1	NO
NTNG1	1.97514e-07	1.46194e-05	YES	9	34	0	NA	0	NA	0	NO
NUP160	2.00976e-07	1.47697e-05	YES	9	29	0	NA	0	NA	0	NO
PEX1	2.01787e-07	1.47697e-05	YES	9	33	0	NA	0	NA	0	NO
REV3L	2.04954e-07	1.49002e-05	YES	10	31	0	NA	0	NA	0	NO
MYBL2	2.05833e-07	1.49002e-05	YES	9	34	1	capHir1	0	NA	1	NO
MEIS1	2.14772e-07	1.53629e-05	YES	10	32	0	NA	0	NA	0	NO
CPLX2	2.15077e-07	1.53629e-05	YES	10	32	0	NA	0	NA	0	NO
TMEM88	2.15723e-07	1.53629e-05	YES	9	34	0	NA	0	NA	0	NO
FAM207A	2.34952e-07	1.66345e-05	YES	8	31	1	capHir1	0	NA	1	NO
CA11	2.36103e-07	1.66345e-05	YES	9	33	0	NA	0	NA	0	NO
TRIM35	2.383e-07	1.67e-05	YES	8	31	0	NA	0	NA	0	NO
VGLL3	2.43407e-07	1.69676e-05	YES	9	34	0	NA	0	NA	0	NO
SLC25A42	2.61242e-07	1.80514e-05	YES	10	32	0	NA	0	NA	0	NO
FLCN	2.61694e-07	1.80514e-05	YES	10	34	0	NA	0	NA	0	NO
GADD45GIP1	2.66681e-07	1.81511e-05	YES	10	30	0	NA	0	NA	0	NO
CDC14A	2.67555e-07	1.81511e-05	YES	8	31	0	NA	0	NA	0	NO
NCAPG	2.69474e-07	1.81511e-05	YES	9	34	0	NA	0	NA	0	NO
KCNG1	2.70438e-07	1.81511e-05	YES	8	31	0	NA	0	NA	0	NO
CELF5	2.71785e-07	1.81511e-05	YES	10	24	0	NA	0	NA	0	NO
WDTC1	2.72931e-07	1.81511e-05	YES	10	32	0	NA	0	NA	0	NO
ASXL2	2.73805e-07	1.81511e-05	YES	10	31	1	capHir1	0	NA	1	NO
WDR24	2.75318e-07	1.81511e-05	YES	9	33	1	capHir1	0	NA	1	NO
MSX2	2.75539e-07	1.81511e-05	YES	7	29	1	capHir1	0	NA	1	NO
CREB3L2	2.86237e-07	1.8762e-05	YES	10	32	1	capHir1	0	NA	1	NO
SLC26A6	2.93819e-07	1.91637e-05	YES	8	32	0	NA	0	NA	0	NO
PPAP2C	3.19424e-07	2.06939e-05	YES	10	33	0	NA	0	NA	0	NO
SEPT6	3.20421e-07	2.06939e-05	YES	10	31	0	NA	0	NA	0	NO
C17orf70	3.24802e-07	2.0856e-05	YES	7	34	0	NA	0	NA	0	NO
FAM129C	3.26098e-07	2.0856e-05	YES	7	32	0	NA	0	NA	0	NO
TTF2	3.27947e-07	2.0873e-05	YES	9	32	1	chrAsi1	0	NA	1	NO
OSBPL10	3.38153e-07	2.14191e-05	YES	9	32	0	NA	0	NA	0	NO
C9orf171	3.80723e-07	2.40001e-05	YES	9	32	0	NA	0	NA	0	NO
SH3GL1	3.86831e-07	2.42691e-05	YES	10	32	0	NA	0	NA	0	NO
RASA4	3.92664e-07	2.45183e-05	YES	9	25	1	capHir1	0	NA	1	NO
ALG2	4.07863e-07	2.53471e-05	YES	10	36	0	NA	0	NA	0	NO
CABP7	4.12214e-07	2.54973e-05	YES	9	37	1	capHir1	0	NA	1	NO
TXLNA	4.15824e-07	2.56004e-05	YES	9	31	0	NA	0	NA	0	NO
ZMYND15	4.30283e-07	2.63076e-05	YES	9	37	0	NA	0	NA	0	NO
CCDC97	4.3206e-07	2.63076e-05	YES	10	34	0	NA	0	NA	0	NO
BTBD3	4.33301e-07	2.63076e-05	YES	10	30	0	NA	0	NA	0	NO
NF2	4.44875e-07	2.68864e-05	YES	8	30	0	NA	0	NA	0	NO
SZT2	4.52611e-07	2.7229e-05	YES	8	35	1	capHir1	0	NA	1	NO
CECR5	4.66322e-07	2.79263e-05	YES	9	28	0	NA	0	NA	0	NO
FAM171A1	4.73149e-07	2.8207e-05	YES	8	34	0	NA	0	NA	0	NO
KCNV2	4.95959e-07	2.94336e-05	YES	9	30	0	NA	0	NA	0	NO
CBX2	5.18865e-07	3.06549e-05	YES	9	35	1	capHir1	0	NA	1	NO
PSMD1	5.32485e-07	3.13192e-05	YES	9	30	1	capHir1	0	NA	1	NO
MAGI1	5.38546e-07	3.15348e-05	YES	8	30	0	NA	0	NA	0	NO
GOPC	5.52109e-07	3.2186e-05	YES	9	30	0	NA	0	NA	0	NO
PIGG	5.5465e-07	3.21917e-05	YES	8	31	0	NA	0	NA	0	NO
KCNG4	5.97186e-07	3.43878e-05	YES	10	34	0	NA	0	NA	0	NO
CLCF1	5.97708e-07	3.43878e-05	YES	10	34	0	NA	0	NA	0	NO
NFE2L2	6.68842e-07	3.8313e-05	YES	10	37	1	conCri1	0	NA	1	NO
PLEKHA5	6.79052e-07	3.87295e-05	YES	8	30	0	NA	0	NA	0	NO
KDM4B	7.27195e-07	4.12965e-05	YES	9	27	0	NA	0	NA	0	NO
HLA_DRB5	7.52613e-07	4.25565e-05	YES	8	26	2	capHir1;triMan1	0	NA	2	NO
PAX8	7.58746e-07	4.272e-05	YES	10	32	0	NA	0	NA	0	NO
ZNF592	7.75198e-07	4.34606e-05	YES	7	34	1	capHir1	1	rhiRox1	1	NO
LRIT2	7.85746e-07	4.38652e-05	YES	9	36	8	nanGal1;hetGla2;eptFus1;myoDav1;myoLuc2;conCri1;triMan1;chrAsi1	2	cerSim1;loxAfr3	5	YES
SFI1	8.53819e-07	4.74644e-05	YES	9	33	2	capHir1;conCri1	0	NA	2	NO
SLC9A5	8.77008e-07	4.85486e-05	YES	10	33	0	NA	0	NA	0	NO
HIBADH	9.42741e-07	5.19691e-05	YES	10	33	0	NA	0	NA	0	NO
SENP2	9.70598e-07	5.32818e-05	YES	10	34	1	chrAsi1	0	NA	1	NO
AP2A1	1.06443e-06	5.81903e-05	YES	8	29	1	capHir1	0	NA	1	NO
ALS2CL	1.143e-06	6.20524e-05	YES	8	31	0	NA	0	NA	0	NO
FKBP8	1.1445e-06	6.20524e-05	YES	9	36	1	capHir1	0	NA	1	NO
NOC4L	1.34683e-06	7.2165e-05	YES	9	26	0	NA	0	NA	0	NO
FAM186B	1.34686e-06	7.2165e-05	YES	10	38	1	hetGla2	3	turTru2;orcOrc1;balAcu1	1	NO
CHMP1B	1.34745e-06	7.2165e-05	YES	8	38	0	NA	0	NA	0	NO
CHRNA4	1.4101e-06	7.5215e-05	YES	8	32	1	capHir1	0	NA	1	NO
RBCK1	1.45527e-06	7.7311e-05	YES	10	33	0	NA	0	NA	0	NO
PCDHGA7	1.47532e-06	7.80616e-05	YES	8	33	0	NA	0	NA	0	NO
BBS1	1.5358e-06	8.09369e-05	YES	10	34	0	NA	0	NA	0	NO
TNNT1	1.60947e-06	8.44813e-05	YES	7	29	0	NA	0	NA	0	NO
KRBOX4	1.64631e-06	8.6072e-05	YES	6	24	0	NA	2	mm10;rn6	0	NO
ATP6AP1	1.68373e-06	8.76803e-05	YES	10	32	0	NA	0	NA	0	NO
APOE	1.73407e-06	8.99464e-05	YES	9	26	0	NA	0	NA	0	NO
MDGA1	1.77262e-06	9.15854e-05	YES	8	30	1	capHir1	0	NA	1	NO
HIP1	1.84595e-06	9.50013e-05	YES	8	30	0	NA	0	NA	0	NO
DGCR6L	1.89454e-06	9.71229e-05	YES	9	32	1	chrAsi1	0	NA	1	NO
NFE2	1.92657e-06	9.8244e-05	YES	10	38	0	NA	0	NA	0	NO
SRRM4	1.93132e-06	9.8244e-05	YES	10	33	0	NA	0	NA	0	NO
ZNF668	2.41722e-06	0.000122488	YES	10	33	1	capHir1	0	NA	1	NO
FBLN1	2.64182e-06	0.000133356	YES	8	31	0	NA	0	NA	0	NO
GUCA1B	2.70521e-06	0.000136035	YES	9	33	3	hetGla2;conCri1;chrAsi1	0	NA	3	YES
FLT3LG	2.75612e-06	0.000138068	YES	8	24	0	NA	0	NA	0	NO
ATP6V0C	2.83988e-06	0.000141725	YES	10	37	1	capHir1	0	NA	1	NO
EZR	2.85955e-06	0.000142168	YES	7	35	0	NA	0	NA	0	NO
TMPRSS6	3.09079e-06	0.000152571	YES	6	26	0	NA	0	NA	0	NO
EFNB3	3.09196e-06	0.000152571	YES	9	34	1	capHir1	0	NA	1	NO
ICAM4	3.71869e-06	0.000182812	YES	10	36	0	NA	0	NA	0	NO
XRCC3	3.80809e-06	0.000186512	YES	7	33	0	NA	0	NA	0	NO
PCDHAC1	3.9918e-06	0.000194785	YES	10	35	4	hetGla2;capHir1;triMan1;chrAsi1	3	oryCun2;canFam3;loxAfr3	3	YES
DIAPH3	4.14559e-06	0.000201543	YES	8	25	1	capHir1	0	NA	1	NO
MBTPS1	4.25401e-06	0.000206053	YES	9	31	0	NA	0	NA	0	NO
KCTD15	4.68928e-06	0.000226305	YES	10	36	0	NA	0	NA	0	NO
OTOP2	5.05599e-06	0.000243112	YES	9	37	1	capHir1	0	NA	1	NO
SERBP1	5.12977e-06	0.000245212	YES	8	33	0	NA	0	NA	0	NO
KCNQ2	5.13689e-06	0.000245212	YES	8	24	0	NA	0	NA	0	NO
LASP1	5.30201e-06	0.00025218	YES	10	38	1	capHir1	0	NA	1	NO
DLEC1	6.72583e-06	0.000318751	YES	9	27	1	capHir1	0	NA	1	NO
ZC3H7B	6.93543e-06	0.000326789	YES	8	28	0	NA	0	NA	0	NO
THBS3	6.94505e-06	0.000326789	YES	10	35	0	NA	1	balAcu1	0	NO
DMPK	7.33161e-06	0.000343751	YES	9	33	0	NA	0	NA	0	NO
PDCL	7.85926e-06	0.000367184	YES	10	37	0	NA	0	NA	0	NO
CDHR2	7.94902e-06	0.000370065	YES	9	35	1	capHir1	0	NA	1	NO
BEST2	8.07139e-06	0.000374439	YES	8	31	0	NA	0	NA	0	NO
UNC5B	8.15248e-06	0.000376873	YES	10	36	1	capHir1	1	felCat8	1	NO
SERPING1	8.38389e-06	0.000386216	YES	10	34	0	NA	0	NA	0	NO
CTD_3074O7,11	8.61399e-06	0.000395433	YES	8	34	0	NA	0	NA	0	NO
RNF123	9.33514e-06	0.00042705	YES	10	32	1	capHir1	1	oryCun2	1	NO
C17orf64	9.86781e-06	0.000449856	YES	10	37	1	hetGla2	0	NA	1	NO
MED25	9.93301e-06	0.000451267	YES	7	32	1	capHir1	0	NA	1	NO
CDR2	1.00097e-05	0.00045319	YES	10	32	1	capHir1	1	panPan1	1	NO
TLE2	1.05432e-05	0.00047571	YES	10	29	0	NA	0	NA	0	NO
EIF2B2	1.10165e-05	0.000495367	YES	10	37	0	NA	0	NA	0	NO
DHX16	1.15613e-05	0.000518097	YES	9	34	2	capHir1;myoDav1	0	NA	2	NO
PSMC1	1.1652e-05	0.000520389	YES	7	36	0	NA	0	NA	0	NO
CXCL17	1.23785e-05	0.00055097	YES	10	32	2	nanGal1;capHir1	0	NA	2	NO
TNIP3	1.28125e-05	0.000568366	YES	9	31	0	NA	0	NA	0	NO
IFIT3	1.31639e-05	0.000581993	YES	9	33	1	capHir1	1	orcOrc1	1	NO
PPEF2	1.33913e-05	0.00059007	YES	9	33	2	nanGal1;conCri1	1	cavPor3	2	NO
PREX1	1.43157e-05	0.000628696	YES	8	29	1	capHir1	1	equCab2	1	NO
PYY	1.44509e-05	0.000632528	YES	8	31	1	myoLuc2	0	NA	1	NO
GCC1	1.47826e-05	0.000644904	YES	10	36	0	NA	0	NA	0	NO
BCAS2	1.49561e-05	0.00065032	YES	10	36	1	eptFus1	0	NA	1	NO
UNC93B1	1.53911e-05	0.000667031	YES	8	32	0	NA	0	NA	0	NO
FBXO15	1.61167e-05	0.000696187	YES	9	33	0	NA	0	NA	0	NO
TFAP4	1.77227e-05	0.000763062	YES	10	36	0	NA	0	NA	0	NO
POLG	1.78441e-05	0.000765786	YES	8	34	1	capHir1	0	NA	1	NO
SERPINE3	1.89359e-05	0.00081	YES	10	34	7	nanGal1;hetGla2;eptFus1;myoDav1;myoLuc2;conCri1;chrAsi1	0	NA	5	YES
LRWD1	1.9957e-05	0.000850919	YES	10	35	2	micOch1;capHir1	0	NA	2	NO
PDCD1	2.0236e-05	0.00086003	YES	6	28	0	NA	0	NA	0	NO
TIMM8A	2.12217e-05	0.00089715	YES	9	33	1	capHir1	1	rn6	1	NO
ALPK1	2.12456e-05	0.00089715	YES	7	31	0	NA	0	NA	0	NO
IL17RE	2.14102e-05	0.000901211	YES	9	29	1	conCri1	0	NA	1	NO
PLA2G2E	2.25148e-05	0.000944689	YES	10	35	0	NA	0	NA	0	NO
EMC10	2.33449e-05	0.00097641	YES	6	30	0	NA	0	NA	0	NO
UCN3	2.53235e-05	0.00105581	YES	10	35	1	capHir1	0	NA	1	NO
FAM161B	2.63603e-05	0.00109557	YES	10	34	0	NA	0	NA	0	NO
TMEM165	2.79988e-05	0.00116001	YES	6	28	0	NA	0	NA	0	NO
ANKS3	2.88447e-05	0.00119131	YES	9	33	1	capHir1	0	NA	1	NO
BHMG1	2.90358e-05	0.00119546	YES	10	33	2	eptFus1;chrAsi1	0	NA	2	NO
SLC6A8	3.14019e-05	0.00128885	YES	9	30	1	capHir1	0	NA	1	NO
KRT15	3.16428e-05	0.00129305	YES	10	35	0	NA	0	NA	0	NO
LACTBL1	3.17883e-05	0.00129305	YES	7	21	3	nanGal1;hetGla2;chrAsi1	0	NA	3	YES
NUMBL	3.17987e-05	0.00129305	YES	8	30	0	NA	0	NA	0	NO
PLXNB3	3.2074e-05	0.00130023	YES	7	30	1	capHir1	0	NA	1	NO
VMAC	3.21911e-05	0.00130098	YES	9	28	0	NA	1	otoGar3	0	NO
PDE6H	3.47609e-05	0.00140053	YES	9	35	1	nanGal1	0	NA	1	NO
NAP1L1	3.57506e-05	0.00143602	YES	10	33	0	NA	1	speTri2	0	NO
TGM5	3.70248e-05	0.00148268	YES	9	37	0	NA	1	orcOrc1	0	NO
C5orf34	3.85321e-05	0.00153836	YES	9	32	0	NA	0	NA	0	NO
MCTP1	3.87883e-05	0.00154094	YES	10	32	0	NA	0	NA	0	NO
SPO11	3.88305e-05	0.00154094	YES	10	36	0	NA	0	NA	0	NO
ARR3	4.15107e-05	0.00164235	YES	9	36	8	micOch1;nanGal1;hetGla2;eptFus1;myoDav1;conCri1;triMan1;chrAsi1	2	cavPor3;loxAfr3	6	YES
PDE12	4.17892e-05	0.00164842	YES	10	34	0	NA	0	NA	0	NO
ATP4B	4.43596e-05	0.00174459	YES	8	36	0	NA	0	NA	0	NO
EGLN2	5.25408e-05	0.00206019	YES	10	34	0	NA	1	balAcu1	0	NO
UNC13D	5.4016e-05	0.00211175	YES	8	34	2	capHir1;myoDav1	0	NA	2	NO
OBFC1	5.58707e-05	0.00217215	YES	10	36	0	NA	0	NA	0	NO
TUBB4A	5.58907e-05	0.00217215	YES	9	28	1	capHir1	0	NA	1	NO
ALDH3A1	6.01849e-05	0.00233216	YES	8	31	2	hetGla2;triMan1	1	loxAfr3	2	NO
DIAPH2	6.04572e-05	0.00233585	YES	9	27	1	capHir1	1	felCat8	1	NO
ECHDC2	6.30578e-05	0.0024292	YES	9	34	0	NA	0	NA	0	NO
C11orf86	6.37481e-05	0.00244863	YES	9	34	1	capHir1	0	NA	1	NO
TRIM26	6.57982e-05	0.00252003	YES	9	35	0	NA	0	NA	0	NO
ANKRD61	6.73656e-05	0.00257258	YES	10	38	0	NA	1	turTru2	0	NO
EPHA1	6.9639e-05	0.00264693	YES	10	35	0	NA	0	NA	0	NO
FLNA	6.97143e-05	0.00264693	YES	10	28	1	capHir1	1	panPan1	1	NO
SPDYC	7.0037e-05	0.00265058	YES	7	32	3	hetGla2;capHir1;conCri1	7	speTri2;perManBai1;mm10;rn6;cavPor3;octDeg1;ochPri3	3	YES
HKDC1	7.02127e-05	0.00265058	YES	10	33	0	NA	0	NA	0	NO
KAT2B	8.10505e-05	0.00305097	YES	10	32	1	capHir1	1	perManBai1	1	NO
ALDH16A1	8.28767e-05	0.00310654	YES	9	33	0	NA	0	NA	0	NO
POU5F1	8.29983e-05	0.00310654	YES	10	32	1	micOch1	0	NA	1	NO
HIST1H2AM	8.37385e-05	0.00312537	YES	8	32	0	NA	0	NA	0	NO
GSG1	8.40219e-05	0.00312709	YES	9	38	1	conCri1	0	NA	1	NO
VSTM4	8.54067e-05	0.00316967	YES	8	30	1	capHir1	0	NA	1	NO
SMIM22	8.61697e-05	0.00318901	YES	10	38	0	NA	0	NA	0	NO
PHLDB1	8.79803e-05	0.00324689	YES	5	36	0	NA	1	bisBis1	0	NO
CRLS1	9.04831e-05	0.00332993	YES	5	24	1	capHir1	2	rhiRox1;musFur1	1	NO
DIS3L2	9.53028e-05	0.00349753	YES	9	24	0	NA	0	NA	0	NO
CENPA	9.86494e-05	0.00361029	YES	8	32	0	NA	0	NA	0	NO
PLA2G4B	0.000100644	0.00367308	YES	9	32	0	NA	0	NA	0	NO
PPARGC1B	0.00010363	0.0037716	YES	10	35	1	capHir1	0	NA	1	NO
GRIN3B	0.000104057	0.00377673	YES	9	23	1	capHir1	2	turTru2;orcOrc1	1	NO
PHF21A	0.000105043	0.00380203	YES	10	34	0	NA	0	NA	0	NO
CSTF2T	0.000106863	0.00385731	YES	9	33	1	myoLuc2	0	NA	1	NO
AARS2	0.00010898	0.00392297	YES	10	33	0	NA	0	NA	0	NO
CLDN7	0.00010928	0.00392306	YES	10	33	1	capHir1	0	NA	1	NO
PIK3R4	0.000110378	0.00395172	YES	9	32	1	capHir1	0	NA	1	NO
LIPE	0.000114195	0.0040773	YES	9	30	0	NA	0	NA	0	NO
ULK2	0.000115615	0.00411684	YES	10	27	2	hetGla2;capHir1	0	NA	2	NO
C16orf46	0.000116054	0.00412133	YES	10	38	0	NA	0	NA	0	NO
TBCD	0.000116848	0.00413836	YES	7	30	0	NA	0	NA	0	NO
DLG4	0.000117841	0.00415346	YES	10	35	0	NA	0	NA	0	NO
UGT1A8	0.000118036	0.00415346	YES	8	34	0	NA	0	NA	0	NO
DIXDC1	0.00011822	0.00415346	YES	10	34	0	NA	0	NA	0	NO
DYSF	0.000118827	0.00416367	YES	9	28	0	NA	0	NA	0	NO
FNIP2	0.000120444	0.00420914	YES	10	29	0	NA	0	NA	0	NO
TIFAB	0.000126275	0.00440125	YES	9	38	2	hetGla2;triMan1	0	NA	2	NO
RBP4	0.00013162	0.00457239	YES	10	33	0	NA	0	NA	0	NO
TEKT5	0.000131879	0.00457239	YES	9	33	2	nanGal1;hetGla2	0	NA	2	NO
MCEMP1	0.000133241	0.00460747	YES	8	35	0	NA	0	NA	0	NO
CCNY	0.000139985	0.00482802	YES	10	31	0	NA	0	NA	0	NO
PRSS36	0.000151301	0.00520469	YES	7	30	3	micOch1;nanGal1;hetGla2	2	mm10;rn6	3	YES
BNC2	0.000153971	0.00527108	YES	10	35	0	NA	0	NA	0	NO
EVX1	0.000154032	0.00527108	YES	8	28	0	NA	0	NA	0	NO
GBGT1	0.000162524	0.00554729	YES	8	37	1	hetGla2	2	rn6;ochPri3	1	NO
SYAP1	0.000164835	0.00561164	YES	9	32	0	NA	0	NA	0	NO
DGCR8	0.00016568	0.00562586	YES	10	34	0	NA	0	NA	0	NO
TRIM46	0.000172983	0.00585875	YES	9	33	0	NA	0	NA	0	NO
SNAPC2	0.000181197	0.00612121	YES	10	36	2	hetGla2;capHir1	5	cavPor3;octDeg1;ochPri3;equCab2;cerSim1	2	NO
SLC4A8	0.000190443	0.0064171	YES	10	32	0	NA	0	NA	0	NO
IGSF9	0.000215863	0.00725509	YES	10	33	1	capHir1	0	NA	1	NO
PDZD2	0.000220933	0.0074066	YES	10	32	0	NA	0	NA	0	NO
TMEM8C	0.000228899	0.00765416	YES	7	32	1	capHir1	0	NA	1	NO
ZDHHC14	0.000240391	0.00801811	YES	9	32	0	NA	0	NA	0	NO
SF3A2	0.000244956	0.00814974	YES	9	29	1	capHir1	0	NA	1	NO
PLXNA2	0.000247181	0.00820305	YES	7	27	0	NA	0	NA	0	NO
DDX24	0.000256032	0.00847542	YES	8	33	0	NA	0	NA	0	NO
KLK1	0.000257669	0.00850826	YES	9	33	1	chrAsi1	0	NA	1	NO
DOT1L	0.000270077	0.00889567	YES	10	25	1	capHir1	0	NA	1	NO
WNT4	0.000274055	0.00900418	YES	8	33	1	capHir1	0	NA	1	NO
FRMD4A	0.000275343	0.00902399	YES	9	25	1	capHir1	2	panPan1;rn6	1	NO
TSACC	0.000278347	0.00909981	YES	9	36	5	hetGla2;myoDav1;myoLuc2;conCri1;chrAsi1	0	NA	4	YES
CD97	0.000279318	0.00910895	YES	9	30	2	myoDav1;myoLuc2	4	turTru2;orcOrc1;balAcu1;cerSim1	1	NO
PPM1N	0.000288487	0.00938474	YES	6	30	3	nanGal1;myoLuc2;conCri1	1	camFer1	3	YES
ABCG8	0.000289564	0.00939658	YES	10	33	1	triMan1	1	loxAfr3	1	NO
CHFR	0.000299329	0.00968004	YES	10	34	0	NA	0	NA	0	NO
ANKS1A	0.000299769	0.00968004	YES	6	30	0	NA	0	NA	0	NO
HGS	0.00030066	0.00968506	YES	8	29	0	NA	0	NA	0	NO
SAMD4A	0.000318397	0.0102314	YES	10	34	0	NA	0	NA	0	NO
RBM15	0.000321514	0.0103064	YES	9	37	0	NA	0	NA	0	NO
ZNF648	0.000324594	0.0103619	YES	6	30	2	myoDav1;myoLuc2	2	cavPor3;octDeg1	1	NO
ATP13A1	0.000324818	0.0103619	YES	10	36	0	NA	0	NA	0	NO
DMRTB1	0.000330896	0.0105303	YES	9	22	0	NA	0	NA	0	NO
MTNR1B	0.000338868	0.010758	YES	7	33	3	nanGal1;hetGla2;chrAsi1	3	calJac3;orcOrc1;balAcu1	3	YES
TOX2	0.000342732	0.0108546	YES	10	32	0	NA	0	NA	0	NO
SPTBN5	0.000345119	0.0109039	YES	9	30	6	nanGal1;hetGla2;eptFus1;myoDav1;myoLuc2;conCri1	5	rn6;camFer1;turTru2;orcOrc1;balAcu1	4	YES
PCDHA4	0.000349855	0.0110271	YES	6	23	1	triMan1	0	NA	1	NO
RBP3	0.000357459	0.0112088	YES	5	36	2	nanGal1;eptFus1	0	NA	2	NO
GRIFIN	0.000357863	0.0112088	YES	6	33	3	nanGal1;eptFus1;chrAsi1	0	NA	3	YES
CELF2	0.000358917	0.0112088	YES	9	33	0	NA	0	NA	0	NO
SLC25A33	0.000359023	0.0112088	YES	10	30	0	NA	0	NA	0	NO
KRTAP23_1	0.000373416	0.0116306	YES	9	37	6	micOch1;hetGla2;capHir1;eptFus1;triMan1;chrAsi1	9	perManBai1;mm10;rn6;ochPri3;orcOrc1;felCat8;canFam3;odoRosDiv1;pteVam1	5	YES
MBLAC2	0.000376003	0.0116609	YES	8	36	0	NA	0	NA	0	NO
ADCY9	0.000376158	0.0116609	YES	9	32	0	NA	0	NA	0	NO
CCDC8	0.000381655	0.0118035	YES	5	33	1	hetGla2	2	mm10;camFer1	1	NO
GGT7	0.000382867	0.0118133	YES	10	35	0	NA	0	NA	0	NO
LIPF	0.000384409	0.0118332	YES	9	35	1	capHir1	2	musFur1;pteAle1	1	NO
DEFB103B	0.000391548	0.0120248	YES	9	33	0	NA	0	NA	0	NO
ST5	0.000406556	0.0124567	YES	10	35	0	NA	0	NA	0	NO
DCAF5	0.000410827	0.0125584	YES	10	34	2	capHir1;myoDav1	0	NA	2	NO
LPPR2	0.000426725	0.0130141	YES	10	35	0	NA	0	NA	0	NO
NADK	0.000433193	0.0131809	YES	10	33	0	NA	0	NA	0	NO
NRXN2	0.000435875	0.0132319	YES	9	28	1	myoDav1	0	NA	1	NO
WDR33	0.000439973	0.0133256	YES	9	37	0	NA	0	NA	0	NO
PRSS12	0.000448953	0.0135664	YES	9	35	0	NA	1	speTri2	0	NO
MRPS26	0.000461087	0.0139012	YES	8	31	1	capHir1	0	NA	1	NO
ANKRD35	0.000473749	0.0142503	YES	9	32	1	triMan1	0	NA	1	NO
C15orf59	0.000484776	0.0145488	YES	9	34	1	capHir1	0	NA	1	NO
IGDCC3	0.000486348	0.0145628	YES	9	32	0	NA	0	NA	0	NO
TUSC2	0.000493183	0.014734	YES	10	33	0	NA	0	NA	0	NO
NR4A1	0.000499694	0.0148647	YES	10	35	0	NA	0	NA	0	NO
NOTCH2	0.000499815	0.0148647	YES	9	32	2	capHir1;myoLuc2	0	NA	2	NO
HTR1D	0.000501342	0.0148765	YES	10	37	0	NA	0	NA	0	NO
SOGA1	0.00052687	0.0155989	YES	10	32	0	NA	0	NA	0	NO
RILP	0.000542949	0.0160389	YES	8	30	1	capHir1	0	NA	1	NO
SGK494	0.000546951	0.016121	YES	10	37	4	nanGal1;hetGla2;conCri1;chrAsi1	0	NA	4	YES
BSND	0.000559163	0.0164441	YES	9	32	0	NA	0	NA	0	NO
PITPNM3	0.000568037	0.0166679	YES	8	34	0	NA	0	NA	0	NO
PRSS53	0.000573837	0.0167872	YES	10	38	0	NA	0	NA	0	NO
MVB12A	0.000574651	0.0167872	YES	10	34	0	NA	0	NA	0	NO
TMC8	0.000581196	0.0169408	YES	5	30	0	NA	0	NA	0	NO
ZNF212	0.000587097	0.0170751	YES	10	34	0	NA	0	NA	0	NO
TAF6	0.000605937	0.0175842	YES	9	33	0	NA	1	ochPri3	0	NO
DENND4B	0.000616688	0.0178568	YES	8	33	0	NA	1	canFam3	0	NO
CEP131	0.000621724	0.0179632	YES	6	28	0	NA	0	NA	0	NO
MYO5B	0.00062908	0.0181074	YES	7	30	2	hetGla2;capHir1	1	felCat8	2	NO
CD247	0.000629465	0.0181074	YES	9	30	1	capHir1	0	NA	1	NO
TRAF7	0.00064591	0.01854	YES	9	33	0	NA	0	NA	0	NO
MT1X	0.000651599	0.0186626	YES	5	29	1	nanGal1	0	NA	1	NO
EML2	0.00066141	0.0189026	YES	9	30	0	NA	0	NA	0	NO
SLC26A9	0.000665559	0.01898	YES	9	34	1	capHir1	0	NA	1	NO
ACTN1	0.000672128	0.0191259	YES	9	32	1	capHir1	0	NA	1	NO
CILP	0.000674371	0.0191483	YES	10	34	0	NA	0	NA	0	NO
TTYH2	0.000678756	0.0192314	YES	10	32	0	NA	0	NA	0	NO
NCL	0.000685867	0.0193912	YES	7	26	0	NA	0	NA	0	NO
MAGEB2	0.00070348	0.0198386	YES	9	34	2	hetGla2;capHir1	3	cavPor3;octDeg1;camFer1	2	NO
UPB1	0.000704704	0.0198386	YES	9	30	0	NA	0	NA	0	NO
CAMP	0.000736314	0.0206843	YES	7	34	1	capHir1	2	turTru2;orcOrc1	1	NO
KANK2	0.000744923	0.0208575	YES	8	29	2	nanGal1;hetGla2	0	NA	2	NO
C10orf131	0.000745646	0.0208575	YES	10	35	2	hetGla2;capHir1	4	otoGar3;bosTau8;bisBis1;cerSim1	2	NO
WNT3A	0.000759883	0.0211709	YES	7	31	1	capHir1	0	NA	1	NO
TROVE2	0.000760065	0.0211709	YES	10	36	0	NA	0	NA	0	NO
C11orf42	0.000768707	0.0213665	YES	10	35	0	NA	0	NA	0	NO
HIST2H3D	0.000773083	0.0214429	YES	9	34	1	myoDav1	0	NA	1	NO
SUGP1	0.000779937	0.0215875	YES	10	32	0	NA	0	NA	0	NO
DMRT1	0.000786647	0.0217276	YES	8	26	2	myoDav1;myoLuc2	0	NA	1	NO
KAT2A	0.000802906	0.0221303	YES	10	33	0	NA	0	NA	0	NO
GMEB2	0.000827523	0.0227612	YES	10	29	1	conCri1	0	NA	1	NO
KLHL40	0.000849294	0.0233113	YES	9	28	0	NA	0	NA	0	NO
C19orf81	0.000860923	0.0235814	YES	6	30	0	NA	0	NA	0	NO
PLBD2	0.00086682	0.0236937	YES	7	33	1	conCri1	0	NA	1	NO
RP5_966M1,6	0.000878096	0.0239413	YES	9	37	0	NA	0	NA	0	NO
TMC4	0.000879513	0.0239413	YES	9	29	1	myoLuc2	0	NA	1	NO
COL27A1	0.000882562	0.0239748	YES	7	30	0	NA	0	NA	0	NO
C17orf78	0.00088672	0.0240241	YES	9	33	3	micOch1;nanGal1;capHir1	10	perManBai1;mm10;rn6;octDeg1;oryCun2;ochPri3;turTru2;equCab2;odoRosDiv1;lepWed1	3	YES
TRRAP	0.000888024	0.0240241	YES	8	30	1	capHir1	0	NA	1	NO
LOXL4	0.000893748	0.0240552	YES	9	33	0	NA	0	NA	0	NO
ZNF710	0.000894211	0.0240552	YES	7	31	1	capHir1	0	NA	1	NO
PI3	0.000894652	0.0240552	YES	7	33	0	NA	2	mm10;rn6	0	NO
MSS51	0.00090025	0.0241564	YES	10	36	1	triMan1	3	turTru2;orcOrc1;balAcu1	1	NO
GRIK5	0.000904828	0.0242299	YES	9	26	0	NA	0	NA	0	NO
SAPCD1	0.000924198	0.0246825	YES	10	37	7	nanGal1;hetGla2;eptFus1;myoDav1;myoLuc2;conCri1;chrAsi1	0	NA	5	YES
CRB1	0.000925478	0.0246825	YES	9	33	5	hetGla2;eptFus1;myoLuc2;conCri1;chrAsi1	0	NA	4	YES
TCP11X2	0.00093686	0.0249356	YES	6	25	1	capHir1	3	felCat8;canFam3;odoRosDiv1	1	NO
CHAC1	0.000945134	0.0250698	YES	8	36	0	NA	0	NA	0	NO
C2orf40	0.000946071	0.0250698	YES	8	36	0	NA	0	NA	0	NO
EPB41L3	0.000947611	0.0250698	YES	8	35	0	NA	0	NA	0	NO
SRM	0.000954143	0.025192	YES	9	29	0	NA	0	NA	0	NO
MYEOV2	0.000963542	0.0253893	YES	9	27	0	NA	0	NA	0	NO
B3GNTL1	0.000996196	0.0261974	YES	7	27	0	NA	0	NA	0	NO
TMEM190	0.00100248	0.0263101	YES	5	31	0	NA	0	NA	0	NO
DMRT3	0.00100491	0.0263214	YES	5	21	1	capHir1	0	NA	1	NO
NHLH1	0.0010213	0.0266978	YES	8	33	0	NA	0	NA	0	NO
MRPL43	0.00102891	0.0268432	YES	10	35	0	NA	0	NA	0	NO
FAM200B	0.00103317	0.0269011	YES	7	35	7	micOch1;hetGla2;capHir1;eptFus1;myoLuc2;conCri1;triMan1	13	speTri2;perManBai1;mm10;cavPor3;octDeg1;oryCun2;vicPac2;camFer1;turTru2;felCat8;musFur1;pteAle1;pteVam1	6	YES
SLC25A47	0.00103552	0.0269093	YES	9	35	1	capHir1	0	NA	1	NO
CACNA2D4	0.00108517	0.0281438	YES	7	29	3	nanGal1;capHir1;chrAsi1	5	turTru2;orcOrc1;balAcu1;panHod1;bosTau8	3	YES
TONSL	0.00109443	0.0283284	YES	8	28	0	NA	0	NA	0	NO
PRAF2	0.0010991	0.0283935	YES	9	31	1	capHir1	0	NA	1	NO
IP6K3	0.00110519	0.0284948	YES	7	37	1	hetGla2	0	NA	1	NO
PKD1L2	0.0011259	0.0289721	YES	8	35	6	nanGal1;hetGla2;eptFus1;myoDav1;myoLuc2;chrAsi1	4	turTru2;orcOrc1;balAcu1;odoRosDiv1	4	YES
TPH2	0.00113628	0.029129	YES	10	34	1	capHir1	0	NA	1	NO
ATP2B2	0.00113783	0.029129	YES	9	27	0	NA	0	NA	0	NO
RAD50	0.00113863	0.029129	YES	10	28	1	capHir1	0	NA	1	NO
PDZRN3	0.00116844	0.0298338	YES	8	20	1	capHir1	1	camFer1	1	NO
AF196779,12	0.00118983	0.0303212	YES	8	31	0	NA	0	NA	0	NO
NUAK2	0.00126032	0.0320555	YES	10	33	1	capHir1	0	NA	1	NO
TRIML1	0.001271	0.0322647	YES	9	30	0	NA	0	NA	0	NO
ERICH5	0.00130182	0.0329836	YES	9	34	2	hetGla2;conCri1	3	perManBai1;equCab2;canFam3	2	NO
ABCC6	0.00130788	0.0330735	YES	8	24	0	NA	0	NA	0	NO
KDM4D	0.00132423	0.0334229	YES	7	26	2	capHir1;myoDav1	0	NA	2	NO
KCND1	0.00135631	0.0340724	YES	10	34	0	NA	0	NA	0	NO
TMEM210	0.00135678	0.0340724	YES	6	34	1	hetGla2	0	NA	1	NO
SZRD1	0.00135772	0.0340724	YES	10	34	1	capHir1	0	NA	1	NO
UTP18	0.00136271	0.0341324	YES	6	29	0	NA	0	NA	0	NO
LYZL1	0.00140542	0.0351356	YES	10	33	4	nanGal1;hetGla2;myoDav1;myoLuc2	0	NA	3	YES
CRYBA4	0.00142866	0.0356489	YES	10	35	4	myoDav1;myoLuc2;conCri1;chrAsi1	0	NA	3	YES
PTPRT	0.00144279	0.0359333	YES	9	26	0	NA	0	NA	0	NO
FAM132B	0.00145145	0.0359793	YES	6	22	1	hetGla2	0	NA	1	NO
ASTN2	0.00145228	0.0359793	YES	10	26	0	NA	0	NA	0	NO
C11orf80	0.00145283	0.0359793	YES	7	27	1	hetGla2	0	NA	1	NO
OASL	0.00146595	0.0362362	YES	8	34	1	capHir1	1	speTri2	1	NO
ARL10	0.00147792	0.0364636	YES	7	27	0	NA	0	NA	0	NO
AC069063,2	0.00148907	0.03667	YES	8	33	5	micOch1;nanGal1;hetGla2;myoLuc2;conCri1	6	otoGar3;perManBai1;mm10;octDeg1;ochPri3;odoRosDiv1	5	YES
NFIC	0.00152034	0.0373703	YES	8	29	0	NA	0	NA	0	NO
EPS15	0.00153726	0.0377159	YES	7	33	0	NA	0	NA	0	NO
EGFL6	0.00170872	0.0418447	YES	9	31	1	conCri1	1	orcOrc1	1	NO
SERGEF	0.00173296	0.0423595	YES	10	33	0	NA	0	NA	0	NO
SLC9A3R1	0.0017391	0.042397	YES	9	31	0	NA	0	NA	0	NO
NLRP8	0.00174093	0.042397	YES	5	29	2	hetGla2;capHir1	7	otoGar3;cavPor3;vicPac2;camFer1;equCab2;pteAle1;pteVam1	2	NO
CRYBA2	0.00176491	0.0429016	YES	9	36	4	eptFus1;myoLuc2;conCri1;chrAsi1	0	NA	3	YES
SYCN	0.00179052	0.0434441	YES	10	32	3	hetGla2;capHir1;triMan1	3	cavPor3;equCab2;loxAfr3	3	YES
PINLYP	0.00179668	0.0435134	YES	8	38	0	NA	1	bisBis1	0	NO
MAN2B2	0.00181236	0.0438125	YES	6	23	1	capHir1	3	bisBis1;equCab2;felCat8	1	NO
AFF1	0.00182062	0.0439316	YES	10	24	0	NA	0	NA	0	NO
FAM151A	0.00182991	0.0440751	YES	9	35	0	NA	0	NA	0	NO
MEN1	0.00183469	0.0441095	YES	8	33	0	NA	0	NA	0	NO
GIMAP5	0.00187478	0.0449912	YES	5	31	0	NA	0	NA	0	NO
EXOSC4	0.00188776	0.0452204	YES	7	33	0	NA	0	NA	0	NO
ROM1	0.00193564	0.0462833	YES	8	38	2	nanGal1;conCri1	0	NA	2	NO
DKFZP686J19100	0.00194343	0.0463853	YES	10	36	6	nanGal1;hetGla2;eptFus1;myoDav1;myoLuc2;chrAsi1	2	turTru2;orcOrc1	4	YES
ITLN2	0.0019942	0.0475111	YES	6	24	4	capHir1;conCri1;triMan1;chrAsi1	10	ponAbe2;rheMac3;macFas5;papAnu2;chlSab2;perManBai1;balAcu1;equCab2;felCat8;odoRosDiv1	3	YES
EYS	0.00200636	0.0477144	YES	8	24	7	micOch1;hetGla2;capHir1;eptFus1;myoLuc2;conCri1;chrAsi1	7	ponAbe2;mm10;rn6;octDeg1;oryCun2;bosTau8;musFur1	6	YES
GATC	0.00203631	0.0483395	YES	9	38	1	capHir1	1	pteVam1	1	NO
CRYBB1	0.00204152	0.0483759	YES	10	31	4	myoDav1;myoLuc2;conCri1;chrAsi1	0	NA	3	YES
DENND1C	0.0020603	0.0487333	YES	8	33	0	NA	0	NA	0	NO
CTD_2616J11,11	0.00207381	0.0488936	YES	7	34	1	hetGla2	0	NA	1	NO
ABRA	0.0020745	0.0488936	YES	10	36	1	capHir1	0	NA	1	NO
C2orf50	0.00208621	0.0490818	YES	7	35	2	capHir1;myoLuc2	6	oryCun2;turTru2;orcOrc1;balAcu1;odoRosDiv1;pteAle1	2	NO
PIN1	0.00209842	0.0492811	YES	9	36	0	NA	0	NA	0	NO
WFDC10A	0.00224229	0.0525662		5	27	1	hetGla2	0	NA	1
ANKRD34A	0.00226782	0.0530702		9	34	0	NA	0	NA	0
LIMD1	0.0023051	0.0537725		8	32	1	hetGla2	0	NA	1
ABHD8	0.00230599	0.0537725		8	32	0	NA	0	NA	0
CARD14	0.00231173	0.0538109		8	28	0	NA	2	turTru2;orcOrc1	0
DLK1	0.00232308	0.0539799		9	30	0	NA	0	NA	0
MRPL15	0.00233088	0.0540657		9	33	0	NA	0	NA	0
IGIP	0.00237779	0.0550569		10	38	0	NA	0	NA	0
KCNH4	0.00238241	0.0550671		9	33	0	NA	0	NA	0
SERPIND1	0.00238897	0.055122		9	34	0	NA	0	NA	0
WNT8B	0.00240825	0.0554697		9	34	0	NA	0	NA	0
KRTAP21_3	0.00252	0.0579423		6	34	4	micOch1;nanGal1;hetGla2;eptFus1	14	rheMac3;papAnu2;chlSab2;rhiRox1;calJac3;saiBol1;otoGar3;speTri2;mm10;rn6;octDeg1;oryCun2;vicPac2;camFer1	4
C1orf122	0.00254032	0.0583078		9	26	1	capHir1	0	NA	1
DPPA2	0.00254834	0.0583393		8	34	3	eptFus1;myoDav1;myoLuc2	0	NA	1
LAMP1	0.00255417	0.0583393		8	38	3	eptFus1;myoDav1;myoLuc2	0	NA	1
USP54	0.00255497	0.0583393		10	33	0	NA	0	NA	0
RNF207	0.00256364	0.0583582		7	31	2	hetGla2;capHir1	1	cavPor3	2
L1CAM	0.00256466	0.0583582		9	32	0	NA	0	NA	0
PLXNB1	0.00258303	0.0586748		7	30	0	NA	0	NA	0
GLB1L3	0.00259665	0.0588827		7	29	1	nanGal1	0	NA	1
ANKLE1	0.00262018	0.0592279		8	33	2	micOch1;conCri1	2	tarSyr2;perManBai1	2
PRSS56	0.00262086	0.0592279		9	31	3	nanGal1;conCri1;chrAsi1	0	NA	3
CGN	0.00263811	0.0595156		9	34	1	hetGla2	0	NA	1
ZNF214	0.00264529	0.0595756		8	35	4	nanGal1;hetGla2;myoDav1;myoLuc2	3	perManBai1;mm10;rn6	3
ARHGAP33	0.00268783	0.0604304		8	27	0	NA	0	NA	0
SLC35C2	0.00273777	0.0614483		10	34	0	NA	0	NA	0
SOX10	0.00277307	0.0621346		8	28	0	NA	0	NA	0
LRP1	0.00279377	0.0624797		8	32	1	capHir1	1	turTru2	1
SEMA6A	0.00279795	0.0624797		10	33	0	NA	0	NA	0
LIN7B	0.00296499	0.0660976		7	32	0	NA	0	NA	0
MAST2	0.00297418	0.0661906		10	26	0	NA	0	NA	0
SFMBT2	0.0030286	0.0672881		10	26	1	chrAsi1	0	NA	1
NOL7	0.00305025	0.067655		8	33	0	NA	0	NA	0
ZNF280B	0.00306827	0.0678903		7	33	0	NA	0	NA	0
SHC1	0.00307117	0.0678903		10	36	0	NA	0	NA	0
BLZF1	0.00308514	0.068085		10	33	0	NA	1	ochPri3	0
RPP25	0.00311951	0.0687283		9	34	0	NA	0	NA	0
MAGEB1	0.00312683	0.0687746		8	33	4	nanGal1;hetGla2;myoDav1;myoLuc2	1	ochPri3	3
LDLRAD2	0.00315317	0.0692383		8	30	4	eptFus1;myoDav1;triMan1;chrAsi1	1	orcOrc1	2
PLCZ1	0.00318774	0.069881		9	35	6	micOch1;nanGal1;hetGla2;capHir1;eptFus1;triMan1	13	otoGar3;speTri2;perManBai1;mm10;rn6;octDeg1;oryCun2;bosTau8;bisBis1;equCab2;pteAle1;pteVam1;loxAfr3	6
ADAMTS7	0.00324022	0.0709135		7	22	1	capHir1	3	panTro4;balAcu1;felCat8	1
FXR2	0.00332788	0.0727112		10	33	0	NA	0	NA	0
GLIPR2	0.00335141	0.0731041		9	36	0	NA	0	NA	0
SEL1L	0.0033788	0.0735796		9	33	0	NA	0	NA	0
EIF4EBP1	0.00339388	0.0737861		8	35	0	NA	0	NA	0
MRPL17	0.00342111	0.0742556		10	35	1	eptFus1	0	NA	1
LCN12	0.00350645	0.075947		5	29	2	nanGal1;hetGla2	0	NA	2
C7orf34	0.00351057	0.075947		8	34	5	micOch1;nanGal1;myoDav1;myoLuc2;conCri1	2	speTri2;cerSim1	4
JSRP1	0.00356219	0.0767528		9	27	0	NA	0	NA	0
DACT1	0.00356273	0.0767528		8	25	0	NA	0	NA	0
GRK7	0.00356529	0.0767528		9	36	4	micOch1;nanGal1;hetGla2;myoDav1	3	perManBai1;mm10;rn6	4
STAB1	0.00357909	0.0769242		9	34	1	capHir1	0	NA	1
DFNB31	0.00359195	0.0769857		9	25	1	capHir1	0	NA	1
SLC36A3	0.00359364	0.0769857		8	36	4	nanGal1;hetGla2;triMan1;chrAsi1	1	loxAfr3	3
PCDHGA4	0.00364907	0.0780462		10	33	0	NA	0	NA	0
ARHGEF10	0.00367307	0.0784322		5	27	1	capHir1	0	NA	1
OTUD6A	0.00372591	0.079347		9	29	1	nanGal1	0	NA	1
MT1M	0.00372795	0.079347		6	25	3	micOch1;nanGal1;myoDav1	2	calJac3;tarSyr2	3
RTL1	0.00396369	0.0842285		6	27	1	hetGla2	1	ochPri3	1
OPRD1	0.00401399	0.0851599		8	25	0	NA	0	NA	0
CTTN	0.00402205	0.0851938		7	34	0	NA	0	NA	0
PPFIBP1	0.00403789	0.085392		9	31	0	NA	0	NA	0
HDAC11	0.00405753	0.0856699		9	35	0	NA	0	NA	0
EHD3	0.00409882	0.086297		10	37	0	NA	0	NA	0
MRPS30	0.00410033	0.086297		9	30	1	capHir1	0	NA	1
DVL2	0.00410884	0.0863381		10	34	2	nanGal1;capHir1	1	turTru2	2
RGAG1	0.004161	0.0872948		9	34	5	eptFus1;myoDav1;myoLuc2;conCri1;triMan1	1	calJac3	3
GJA10	0.00418128	0.0874845		10	34	7	nanGal1;hetGla2;eptFus1;myoDav1;myoLuc2;conCri1;chrAsi1	1	lepWed1	5
C10orf90	0.00418332	0.0874845		9	34	1	myoDav1	0	NA	1
MIOX	0.00422989	0.0883183		8	30	0	NA	0	NA	0
BSG	0.0042427	0.0884456		9	33	0	NA	0	NA	0
PODXL	0.00428418	0.0891692		9	34	3	conCri1;triMan1;chrAsi1	1	canFam3	2
RPRD2	0.00434685	0.0902582		8	30	0	NA	0	NA	0
TSGA10IP	0.0043502	0.0902582		9	34	0	NA	1	camFer1	0
REV1	0.00439064	0.090954		10	34	0	NA	1	calJac3	0
CDKL3	0.00449091	0.092885		9	36	0	NA	0	NA	0
PALLD	0.00452133	0.0933675		8	29	1	hetGla2	0	NA	1
ZNF85	0.00453302	0.0934151		7	23	1	capHir1	3	panPan1;cerSim1;musFur1	1
GUCY2F	0.00453781	0.0934151		10	33	7	nanGal1;hetGla2;eptFus1;myoDav1;myoLuc2;triMan1;chrAsi1	2	speTri2;musFur1	4
GAB2	0.00455852	0.093695		9	37	0	NA	0	NA	0
MYO1C	0.00459359	0.0942688		10	32	0	NA	0	NA	0
LAMB3	0.00460128	0.0942798		8	32	0	NA	0	NA	0
PCGF2	0.0046213	0.0945429		9	33	0	NA	0	NA	0
KLK12	0.00466455	0.0952798		8	33	2	hetGla2;triMan1	0	NA	2
FNDC1	0.00468981	0.0956474		5	27	1	micOch1	2	oryCun2;ochPri3	1
WDR6	0.00472074	0.0961294		10	35	0	NA	0	NA	0
ETS2	0.00474712	0.0965174		9	34	0	NA	1	vicPac2	0
TAF10	0.0047808	0.0970525		7	25	1	myoDav1	0	NA	1
C3orf22	0.00483134	0.0979276		7	34	3	nanGal1;myoDav1;myoLuc2	0	NA	2
ABCB5	0.00492442	0.0996609		8	30	3	micOch1;nanGal1;hetGla2	2	orcOrc1;balAcu1	3
TBC1D24	0.00493776	0.0997775		10	35	0	NA	0	NA	0
CCZ1B	0.00502293	0.101343		10	33	0	NA	0	NA	0
ZNF483	0.00514956	0.103739		8	38	2	hetGla2;chrAsi1	0	NA	2
LBHD1	0.00515811	0.103753		10	36	8	micOch1;nanGal1;hetGla2;eptFus1;myoDav1;myoLuc2;conCri1;chrAsi1	8	rheMac3;macFas5;papAnu2;chlSab2;rhiRox1;speTri2;cavPor3;octDeg1	6
ASB12	0.00525308	0.105502		10	36	0	NA	0	NA	0
C8orf33	0.00527668	0.105815		7	25	1	capHir1	2	tarSyr2;camFer1	1
CAPN1	0.00530844	0.10629		8	31	2	capHir1;myoDav1	0	NA	2
HDAC6	0.00538634	0.107686		7	32	2	capHir1;myoDav1	2	camFer1;bosTau8	2
UTS2	0.00541852	0.108165		9	38	2	hetGla2;conCri1	0	NA	2
ELAC2	0.00543465	0.108323		9	33	0	NA	0	NA	0
PLCB3	0.00544385	0.108343		10	31	0	NA	0	NA	0
RASA4B	0.00546979	0.108694		10	28	1	capHir1	1	tarSyr2	1
CHTF18	0.0055111	0.109351		8	29	1	capHir1	0	NA	1
MED12L	0.00552468	0.109455		9	30	0	NA	0	NA	0
ANKRD33	0.00555977	0.109985		9	32	3	nanGal1;myoDav1;chrAsi1	0	NA	3
TSR3	0.00557866	0.110193		6	33	0	NA	0	NA	0
MAN2C1	0.00568338	0.112094		10	32	3	eptFus1;myoDav1;myoLuc2	0	NA	1
ZSCAN9	0.00570771	0.112238		5	30	3	hetGla2;capHir1;conCri1	7	speTri2;mm10;ochPri3;panHod1;canFam3;odoRosDiv1;lepWed1	3
TSTD1	0.00570774	0.112238		8	35	2	eptFus1;myoLuc2	0	NA	1
SGSM1	0.00572461	0.112243		6	33	0	NA	0	NA	0
RAB21	0.00572501	0.112243		6	23	0	NA	0	NA	0
DNHD1	0.00573776	0.112325		10	35	2	hetGla2;myoDav1	3	otoGar3;vicPac2;canFam3	2
WDR46	0.00575433	0.112483		10	37	0	NA	0	NA	0
SPAG6	0.0058538	0.114257		7	36	4	nanGal1;hetGla2;eptFus1;myoLuc2	2	cavPor3;octDeg1	3
RSPH6A	0.00587027	0.114409		9	23	1	capHir1	0	NA	1
ICA1	0.00596773	0.116137		10	32	0	NA	0	NA	0
C9orf24	0.00598285	0.11626		8	34	1	nanGal1	0	NA	1
PRSS57	0.00600449	0.116508		10	30	3	micOch1;nanGal1;hetGla2	2	cavPor3;octDeg1	3
FOXN4	0.00601334	0.116509		8	35	1	hetGla2	1	vicPac2	1
WBSCR16	0.00606952	0.117424		8	21	0	NA	1	equCab2	0
CYB5D2	0.00611297	0.118078		7	31	0	NA	0	NA	0
RLTPR	0.00612122	0.118078		9	21	0	NA	0	NA	0
KRT79	0.00618198	0.119075		10	34	0	NA	3	turTru2;orcOrc1;balAcu1	0
ZNF750	0.00621254	0.119489		9	35	0	NA	0	NA	0
BEST1	0.00625389	0.119995		8	34	3	nanGal1;hetGla2;myoLuc2	0	NA	3
PDZD9	0.00625707	0.119995		9	36	1	hetGla2	0	NA	1
ST20_MTHFS	0.00631983	0.121019		7	37	0	NA	0	NA	0
GPX1	0.0063288	0.121019		7	34	0	NA	0	NA	0
NR0B1	0.00644544	0.12307		8	32	2	eptFus1;myoLuc2	0	NA	1
AC110615,1	0.00646227	0.123213		10	37	3	nanGal1;capHir1;myoLuc2	10	ochPri3;vicPac2;camFer1;turTru2;orcOrc1;balAcu1;bosTau8;bisBis1;pteAle1;pteVam1	3
XRCC1	0.00649559	0.123555		8	30	1	capHir1	0	NA	1
PXMP2	0.00649893	0.123555		7	21	0	NA	0	NA	0
CRYBA1	0.00656054	0.124546		9	37	3	nanGal1;conCri1;chrAsi1	0	NA	3
TRIT1	0.00658562	0.124843		9	37	0	NA	0	NA	0
IL16	0.0066492	0.125867		6	32	0	NA	0	NA	0
LELP1	0.0066895	0.126448		9	35	1	nanGal1	1	orcOrc1	1
TAS2R1	0.00673066	0.127044		10	33	3	hetGla2;conCri1;triMan1	1	orcOrc1	3
MGST1	0.00677581	0.127713		9	35	1	triMan1	0	NA	1
HSPA1B	0.00691884	0.130222		5	28	1	capHir1	0	NA	1
KLHDC7B	0.00695051	0.130468		8	31	0	NA	0	NA	0
SNRNP200	0.00695172	0.130468		10	34	1	myoDav1	0	NA	1
NCOR2	0.00699391	0.130938		7	24	1	capHir1	0	NA	1
IQCE	0.00699659	0.130938		5	28	2	nanGal1;chrAsi1	2	tarSyr2;otoGar3	2
LARP7	0.00717726	0.134128		8	36	1	capHir1	2	panPan1;felCat8	1
FGF2	0.00725142	0.135322		5	24	0	NA	0	NA	0
XXbac_BPG32J3,19	0.00727685	0.135605		10	36	1	capHir1	0	NA	1
GRK4	0.00732413	0.136259		8	32	1	hetGla2	1	orcOrc1	1
CPNE1	0.00733266	0.136259		10	33	0	NA	0	NA	0
RP11_477N12,3	0.00741591	0.137612		7	32	4	hetGla2;myoDav1;myoLuc2;conCri1	3	cavPor3;equCab2;cerSim1	3
GSTM4	0.0074288	0.137657		5	29	2	hetGla2;conCri1	0	NA	2
MYLK3	0.00746976	0.138222		5	34	0	NA	0	NA	0
ETAA1	0.0075149	0.138781		10	32	2	nanGal1;hetGla2	0	NA	2
CABS1	0.00752105	0.138781		10	35	1	hetGla2	0	NA	1
RXFP2	0.00756223	0.139238		10	34	2	triMan1;chrAsi1	0	NA	1
ALX3	0.00756696	0.139238		7	25	0	NA	0	NA	0
C4orf17	0.00758134	0.139255		7	32	0	NA	0	NA	0
UNC93A	0.00759436	0.139255		7	25	0	NA	1	mm10	0
ZNF345	0.00760387	0.139255		5	30	3	nanGal1;capHir1;eptFus1	2	bosTau8;lepWed1	3
TAS2R5	0.00761016	0.139255		10	33	5	micOch1;nanGal1;capHir1;conCri1;triMan1	12	otoGar3;perManBai1;mm10;rn6;oryCun2;ochPri3;camFer1;bosTau8;equCab2;cerSim1;felCat8;odoRosDiv1	5
MAP3K6	0.00763044	0.139433		9	32	0	NA	0	NA	0
DPP6	0.00766467	0.139864		6	20	0	NA	0	NA	0
LENG1	0.00775631	0.141341		9	34	1	capHir1	0	NA	1
IZUMO2	0.00778016	0.14158		9	34	1	hetGla2	0	NA	1
VRK3	0.00792507	0.144018		10	36	1	chrAsi1	0	NA	1
TMEM91	0.00794209	0.144128		9	34	4	eptFus1;myoDav1;myoLuc2;conCri1	0	NA	2
SYCE1L	0.00798079	0.144631		8	30	1	hetGla2	0	NA	1
ZNF526	0.00808008	0.146172		9	32	0	NA	0	NA	0
MS4A7	0.00808798	0.146172		9	31	0	NA	0	NA	0
TKTL1	0.00818025	0.147459		9	30	2	micOch1;nanGal1	0	NA	2
GTF3C5	0.00818162	0.147459		9	33	0	NA	0	NA	0
CNGA4	0.00819797	0.147467		10	35	0	NA	2	turTru2;orcOrc1	0
EPHA8	0.00820444	0.147467		10	31	0	NA	0	NA	0
MPP4	0.00833009	0.149522		10	32	2	nanGal1;hetGla2	0	NA	2
SMYD2	0.00834625	0.149608		9	33	1	myoLuc2	0	NA	1
BAK1	0.00848568	0.151901		9	36	0	NA	1	ponAbe2	0
SLC30A8	0.00854213	0.152556		10	33	1	hetGla2	3	cavPor3;octDeg1;bisBis1	1
PPEF1	0.00854547	0.152556		10	27	0	NA	0	NA	0
IRGC	0.00856428	0.152685		8	31	1	hetGla2	2	turTru2;orcOrc1	1
MAGEB18	0.00863487	0.153736		10	32	3	nanGal1;hetGla2;triMan1	2	cavPor3;octDeg1	3
FEZF1	0.00865665	0.153915		8	34	0	NA	0	NA	0
C21orf62	0.00881102	0.156449		8	37	1	micOch1	0	NA	1
OMA1	0.00893892	0.158351		10	35	0	NA	0	NA	0
MKL2	0.00894217	0.158351		9	31	1	triMan1	0	NA	1
LYZ	0.00896325	0.158511		8	36	2	micOch1;hetGla2	0	NA	2
IL22RA2	0.00908057	0.160371		10	37	0	NA	0	NA	0
TMEM131	0.00911771	0.160811		10	31	0	NA	1	rhiRox1	0
PDE3A	0.00921935	0.162189		6	23	0	NA	0	NA	0
DHX30	0.00922048	0.162189		7	34	0	NA	0	NA	0
GRB10	0.00927133	0.162866		7	33	0	NA	0	NA	0
C5orf49	0.00932392	0.163572		7	23	0	NA	0	NA	0
PPP1R37	0.00941286	0.164913		7	30	1	triMan1	0	NA	1
ARHGEF2	0.00945794	0.165483		9	31	0	NA	0	NA	0
EPHB4	0.0095677	0.167181		10	37	1	capHir1	0	NA	1
ARHGEF12	0.00960583	0.167625		9	28	1	hetGla2	0	NA	1
GJE1	0.00962059	0.16766		10	37	4	nanGal1;hetGla2;conCri1;chrAsi1	3	rhiRox1;saiBol1;otoGar3	4
NFATC4	0.00972054	0.169178		9	32	0	NA	0	NA	0
FAN1	0.00973885	0.169274		9	34	0	NA	0	NA	0
ZFP69B	0.00986698	0.171275		5	33	2	nanGal1;capHir1	3	octDeg1;oryCun2;panHod1	2
CRYGS	0.00992021	0.171972		10	37	3	nanGal1;conCri1;chrAsi1	0	NA	3
TMEM138	0.00998976	0.17295		10	38	0	NA	0	NA	0
TMSB4X	0.0100056	0.172998		9	31	0	NA	0	NA	0
RGS18	0.0100423	0.173403		10	32	0	NA	0	NA	0
ALG14	0.010162	0.174953		9	30	0	NA	0	NA	0
CTD_3088G3,8	0.0101631	0.174953		10	25	8	micOch1;nanGal1;eptFus1;myoDav1;myoLuc2;conCri1;triMan1;chrAsi1	10	calJac3;otoGar3;speTri2;mm10;rn6;cavPor3;octDeg1;ochPri3;camFer1;pteAle1	5
USP20	0.0101719	0.174953		9	29	1	capHir1	0	NA	1
SIKE1	0.0102342	0.175795		9	35	0	NA	0	NA	0
CRB2	0.0102653	0.176101		8	20	1	capHir1	0	NA	1
KCNK1	0.0102882	0.176263		5	23	0	NA	0	NA	0
USH2A	0.010321	0.176596		8	26	3	micOch1;nanGal1;chrAsi1	1	papAnu2	3
IPCEF1	0.0104246	0.178058		8	36	0	NA	0	NA	0
POMT1	0.0104335	0.178058		8	34	0	NA	0	NA	0
GRIK3	0.0104644	0.178355		7	32	0	NA	0	NA	0
ANGPTL6	0.0105748	0.179799		8	26	0	NA	0	NA	0
PLXNA4	0.0105764	0.179799		6	29	1	myoLuc2	0	NA	1
CRYGN	0.0106205	0.180094		9	34	5	nanGal1;hetGla2;eptFus1;myoDav1;triMan1	2	ponAbe2;calJac3	4
CTD_3222D19,2	0.0106211	0.180094		8	31	0	NA	0	NA	0
RNF32	0.0106375	0.18014		8	34	0	NA	0	NA	0
SLC30A10	0.0106651	0.180375		5	22	0	NA	0	NA	0
IL27RA	0.0106879	0.180529		8	31	0	NA	0	NA	0
ZYG11A	0.0107404	0.181184		8	34	0	NA	0	NA	0
FAM83A	0.0108277	0.182423		9	28	1	hetGla2	0	NA	1
NLRC3	0.0108558	0.182663		8	28	1	hetGla2	0	NA	1
DNAH5	0.0109087	0.183319		7	22	1	capHir1	0	NA	1
HDLBP	0.0109409	0.183625		9	30	0	NA	0	NA	0
SLC25A48	0.0110637	0.185451		10	36	0	NA	0	NA	0
CES1	0.0111591	0.186812		8	24	2	nanGal1;hetGla2	1	orcOrc1	2
SPRR2E	0.0112007	0.187227		7	25	1	nanGal1	1	lepWed1	1
OXT	0.0112218	0.187227		6	25	0	NA	0	NA	0
ZNHIT1	0.0112265	0.187227		10	35	0	NA	0	NA	0
PTGDS	0.0112543	0.187452		8	29	0	NA	0	NA	0
GZMK	0.0113521	0.188844		8	37	3	nanGal1;conCri1;chrAsi1	0	NA	3
PRSS54	0.0113734	0.188959		10	36	1	hetGla2	0	NA	1
BRSK1	0.0115322	0.191168		7	26	1	capHir1	1	felCat8	1
WNT7B	0.0115354	0.191168		6	27	0	NA	0	NA	0
CENPU	0.0116297	0.192489		9	35	0	NA	0	NA	0
AQP2	0.0118101	0.19523		9	37	0	NA	0	NA	0
TAP2	0.0119226	0.196773		5	24	1	nanGal1	0	NA	1
FAM171B	0.0119333	0.196773		8	34	2	micOch1;myoDav1	0	NA	2
MMP21	0.0119807	0.197307		6	28	1	capHir1	7	octDeg1;vicPac2;camFer1;turTru2;orcOrc1;balAcu1;bosTau8	1
ZNF597	0.0120104	0.197549		10	37	6	capHir1;eptFus1;myoDav1;myoLuc2;conCri1;chrAsi1	4	orcOrc1;balAcu1;bisBis1;loxAfr3	4
RHO	0.0121749	0.200005		9	36	1	micOch1	0	NA	1
UBE2U	0.0122177	0.200459		8	36	2	nanGal1;hetGla2	0	NA	2
PLSCR2	0.0124043	0.203017		5	32	1	hetGla2	1	bisBis1	1
COL2A1	0.0124045	0.203017		10	37	1	capHir1	1	turTru2	1
IRAK1BP1	0.0124578	0.203637		8	34	0	NA	0	NA	0
SLC25A39	0.0125215	0.204424		10	36	1	myoDav1	0	NA	1
ADAMTSL4	0.0126345	0.206015		9	33	0	NA	0	NA	0
BTBD7	0.0126999	0.206824		8	31	1	hetGla2	0	NA	1
PPP1R3G	0.0127216	0.206923		7	23	1	hetGla2	0	NA	1
LRTOMT	0.0127757	0.207466		10	36	0	NA	0	NA	0
HUNK	0.0127865	0.207466		6	31	1	nanGal1	0	NA	1
RTBDN	0.012954	0.209637		10	36	2	conCri1;chrAsi1	0	NA	2
WNK2	0.0129636	0.209637		9	34	3	nanGal1;capHir1;myoDav1	12	panTro4;rheMac3;macFas5;papAnu2;chlSab2;rhiRox1;calJac3;saiBol1;tarSyr2;otoGar3;camFer1;musFur1	3
ADAM30	0.0129681	0.209637		6	28	1	capHir1	6	cavPor3;octDeg1;ochPri3;orcOrc1;felCat8;canFam3	1
C12orf43	0.0130371	0.210495		9	36	0	NA	0	NA	0
ARHGAP44	0.0130618	0.210635		8	30	0	NA	0	NA	0
HBB	0.0131173	0.211273		8	34	1	triMan1	0	NA	1
SPAG4	0.0131336	0.211277		8	33	2	nanGal1;chrAsi1	0	NA	2
ZNF432	0.013219	0.21239		8	27	3	hetGla2;conCri1;triMan1	2	mm10;loxAfr3	3
PARVG	0.013388	0.214845		7	32	1	capHir1	1	turTru2	1
INSL3	0.013526	0.216794		9	28	0	NA	0	NA	0
KIF21B	0.0135968	0.217446		7	27	1	myoDav1	0	NA	1
CCDC138	0.0136099	0.217446		8	32	0	NA	0	NA	0
HMGB4	0.0136162	0.217446		10	37	0	NA	0	NA	0
MIP	0.0136587	0.217641		10	38	2	conCri1;chrAsi1	0	NA	2
METRNL	0.0136614	0.217641		9	35	0	NA	0	NA	0
DYRK1B	0.0136849	0.217751		10	29	0	NA	0	NA	0
EFCAB6	0.0137999	0.219317		6	31	2	nanGal1;hetGla2	1	orcOrc1	2
TRIM38	0.0138939	0.220308		8	33	2	nanGal1;hetGla2	1	canFam3	2
JARID2	0.0138957	0.220308		9	27	0	NA	0	NA	0
CRYBB3	0.0139342	0.220653		10	32	3	myoDav1;conCri1;chrAsi1	0	NA	3
TXNRD3	0.0139792	0.2211		9	29	1	hetGla2	0	NA	1
WDR11	0.0142089	0.224463		8	33	0	NA	0	NA	0
CXorf65	0.0144539	0.227976		10	35	1	nanGal1	0	NA	1
CRYGC	0.0144659	0.227976		9	32	1	nanGal1	0	NA	1
PPP1R18	0.0144846	0.227998		7	28	0	NA	0	NA	0
B3GNT1	0.0146264	0.229955		10	35	1	capHir1	1	turTru2	1
C19orf84	0.0147036	0.230894		6	38	0	NA	0	NA	0
PRKCD	0.014753	0.23139		10	32	0	NA	2	turTru2;orcOrc1	0
LY6G5B	0.0147717	0.23139		10	38	1	micOch1	1	perManBai1	1
BCL2A1	0.0147879	0.23139		5	37	1	nanGal1	2	perManBai1;mm10	1
TSTA3	0.0148211	0.231635		8	34	0	NA	0	NA	0
AKT1	0.014908	0.232717		7	25	0	NA	0	NA	0
CORO7	0.0149959	0.23381		8	31	0	NA	0	NA	0
DYTN	0.0150135	0.23381		10	36	4	nanGal1;hetGla2;capHir1;triMan1	5	ponAbe2;rn6;bisBis1;canFam3;pteAle1	4
CEP72	0.0150501	0.23384		7	31	2	nanGal1;hetGla2	2	octDeg1;orcOrc1	2
PCDHA5	0.015051	0.23384		5	21	1	triMan1	2	orcOrc1;balAcu1	1
PPY	0.0151584	0.235142		10	37	1	triMan1	0	NA	1
RTFDC1	0.0151904	0.235142		9	37	1	hetGla2	0	NA	1
RBMX2	0.0151952	0.235142		10	35	1	capHir1	2	papAnu2;felCat8	1
FTHL17	0.0152061	0.235142		9	27	1	nanGal1	1	oryCun2	1
MUC7	0.0153293	0.236768		6	29	4	nanGal1;capHir1;eptFus1;myoDav1	10	panPan1;rheMac3;saiBol1;mm10;vicPac2;camFer1;bosTau8;cerSim1;canFam3;pteAle1	3
C1orf35	0.0154762	0.238757		8	32	3	eptFus1;myoDav1;myoLuc2	0	NA	1
GABRR3	0.015527	0.239261		8	33	6	nanGal1;hetGla2;eptFus1;myoDav1;myoLuc2;conCri1	4	orcOrc1;cerSim1;canFam3;lepWed1	4
PRIMPOL	0.0157097	0.241318		9	35	0	NA	0	NA	0
C12orf50	0.015721	0.241318		9	35	0	NA	0	NA	0
TRIM27	0.0157221	0.241318		7	27	2	eptFus1;myoLuc2	0	NA	1
NPBWR1	0.0157337	0.241318		8	24	1	triMan1	0	NA	1
KRTAP12_2	0.0157782	0.241719		7	27	1	chrAsi1	7	rheMac3;macFas5;papAnu2;chlSab2;otoGar3;lepWed1;pteAle1	1
DUSP21	0.0158434	0.242435		10	35	1	hetGla2	0	NA	1
HDC	0.015958	0.243634		9	35	0	NA	0	NA	0
MYOD1	0.0159587	0.243634		8	33	1	micOch1	0	NA	1
AKR1B15	0.0161159	0.245749		6	20	3	nanGal1;capHir1;chrAsi1	5	panHod1;equCab2;lepWed1;pteAle1;loxAfr3	3
TKTL2	0.0162118	0.246925		9	36	3	nanGal1;hetGla2;conCri1	2	turTru2;orcOrc1	3
LY6G5C	0.0163127	0.248175		10	37	2	micOch1;hetGla2	0	NA	2
EGFL7	0.0165028	0.250778		6	32	0	NA	0	NA	0
IQCA1P1	0.0165284	0.250877		7	35	1	hetGla2	3	turTru2;orcOrc1;balAcu1	1
DPPA3	0.0165624	0.251105		5	25	0	NA	1	mm10	0
H1FOO	0.0168319	0.254372		9	29	3	micOch1;myoDav1;myoLuc2	0	NA	2
HSPB9	0.0168473	0.254372		10	36	2	conCri1;chrAsi1	3	ponAbe2;rheMac3;rhiRox1	2
CST3	0.0168526	0.254372		8	21	0	NA	0	NA	0
SLIT3	0.0168551	0.254372		7	28	1	myoLuc2	0	NA	1
LKAAEAR1	0.0169113	0.25467		5	23	1	nanGal1	0	NA	1
TLN1	0.0169136	0.25467		9	34	1	myoDav1	2	balAcu1;pteAle1	1
TGDS	0.0169689	0.255211		8	36	0	NA	0	NA	0
HEATR9	0.0171906	0.258252		10	31	1	nanGal1	0	NA	1
RASSF6	0.017228	0.258517		9	35	1	hetGla2	0	NA	1
SPICE1	0.017519	0.262038		8	36	0	NA	0	NA	0
C3orf52	0.0175201	0.262038		9	29	0	NA	0	NA	0
BCAN	0.0175223	0.262038		8	31	0	NA	0	NA	0
HIGD1B	0.0176197	0.262602		10	38	0	NA	0	NA	0
ARL1	0.0176197	0.262602		10	38	0	NA	0	NA	0
RNF133	0.0176197	0.262602		10	38	0	NA	0	NA	0
NOXRED1	0.0178235	0.265339		10	38	1	hetGla2	0	NA	1
KLHL33	0.0178503	0.265437		10	35	0	NA	0	NA	0
SMIM5	0.0178829	0.265623		9	37	0	NA	0	NA	0
IFFO1	0.0179348	0.266093		8	24	1	capHir1	0	NA	1
PRKCSH	0.0179878	0.266579		8	31	0	NA	0	NA	0
GPR179	0.018008	0.266579		8	31	3	micOch1;nanGal1;conCri1	2	calJac3;musFur1	3
FAM71F1	0.0181478	0.268347		9	37	0	NA	0	NA	0
UTS2R	0.0182913	0.270166		6	29	1	hetGla2	0	NA	1
LYZL2	0.0184987	0.272923		7	34	3	nanGal1;hetGla2;myoLuc2	1	panPan1	3
GCSAM	0.0185931	0.27401		10	36	0	NA	0	NA	0
GSTO2	0.0186559	0.274627		10	37	0	NA	0	NA	0
CKLF_CMTM1	0.0187858	0.27623		8	33	0	NA	0	NA	0
VEGFC	0.0188255	0.276506		10	35	0	NA	0	NA	0
MDH1B	0.0188848	0.277069		10	37	0	NA	0	NA	0
VILL	0.0189384	0.277281		10	29	1	hetGla2	2	rhiRox1;odoRosDiv1	1
MOGAT3	0.0189414	0.277281		10	34	5	micOch1;nanGal1;hetGla2;capHir1;triMan1	9	mm10;cavPor3;octDeg1;turTru2;orcOrc1;balAcu1;panHod1;pteAle1;pteVam1	5
KIAA0141	0.0190207	0.278132		10	35	0	NA	0	NA	0
FUCA2	0.0190852	0.278637		9	36	0	NA	0	NA	0
PTPN18	0.0190975	0.278637		9	30	4	eptFus1;myoDav1;myoLuc2;chrAsi1	4	felCat8;musFur1;pteAle1;pteVam1	2
CAPN11	0.0192179	0.280084		9	34	1	hetGla2	1	canFam3	1
CDKN2A	0.0194034	0.282474		9	34	0	NA	1	rn6	0
MYH15	0.0194954	0.2835		8	32	7	micOch1;nanGal1;hetGla2;eptFus1;myoDav1;myoLuc2;conCri1	14	otoGar3;speTri2;perManBai1;mm10;rn6;cavPor3;octDeg1;oryCun2;ochPri3;orcOrc1;balAcu1;musFur1;odoRosDiv1;pteAle1	5
STX2	0.0196054	0.284786		7	35	0	NA	0	NA	0
FAM98C	0.0196449	0.285045		7	25	0	NA	0	NA	0
C7orf62	0.0197408	0.285417		10	36	0	NA	0	NA	0
TNP1	0.0197408	0.285417		10	36	0	NA	0	NA	0
WDR60	0.0197542	0.285417		8	28	1	eptFus1	0	NA	1
CDNF	0.0197571	0.285417		10	36	0	NA	0	NA	0
TENM4	0.0197981	0.285489		9	27	1	myoLuc2	0	NA	1
CPVL	0.0198055	0.285489		10	36	0	NA	0	NA	0
HES2	0.0198516	0.285805		5	29	0	NA	0	NA	0
RNF112	0.0198873	0.285805		6	25	0	NA	0	NA	0
CDC42BPG	0.0198925	0.285805		9	30	1	capHir1	0	NA	1
ANKRD53	0.0199503	0.286077		9	37	2	nanGal1;hetGla2	0	NA	2
GOT1L1	0.0199666	0.286077		9	36	0	NA	0	NA	0
KCNS1	0.0199765	0.286077		6	28	0	NA	0	NA	0
POLR2M	0.0200403	0.286678		9	36	0	NA	1	cerSim1	0
GDF5	0.0201054	0.28718		9	35	1	capHir1	1	saiBol1	1
MKRN3	0.0201189	0.28718		8	35	4	micOch1;hetGla2;eptFus1;myoLuc2	2	perManBai1;mm10	3
HIGD1C	0.0202949	0.289378		8	34	1	hetGla2	3	otoGar3;turTru2;orcOrc1	1
EHMT1	0.020344	0.289765		6	31	0	NA	0	NA	0
BTBD18	0.0203893	0.290096		10	35	0	NA	0	NA	0
SLC27A5	0.0205273	0.291745		5	31	2	triMan1;chrAsi1	1	loxAfr3	1
PKD2L2	0.0206003	0.292467		10	34	0	NA	0	NA	0
PYGM	0.0206808	0.293293		10	33	0	NA	0	NA	0
CSK	0.0207861	0.29447		10	35	0	NA	0	NA	0
C2orf61	0.020874	0.295091		10	35	1	hetGla2	0	NA	1
CCL28	0.0208747	0.295091		9	36	0	NA	0	NA	0
PLCG2	0.0209201	0.295414		9	29	0	NA	0	NA	0
LRRIQ3	0.0209982	0.2962		9	33	1	hetGla2	0	NA	1
CKLF	0.0210452	0.296206		9	36	0	NA	0	NA	0
SUV39H2	0.021065	0.296206		9	36	0	NA	0	NA	0
LRRC16B	0.021066	0.296206		9	32	0	NA	0	NA	0
BTBD1	0.0211365	0.296523		5	20	0	NA	0	NA	0
H1F0	0.0211751	0.296523		10	35	0	NA	0	NA	0
SRRM1	0.0212044	0.296523		10	34	1	myoLuc2	0	NA	1
ENTPD3	0.0212116	0.296523		9	33	0	NA	0	NA	0
HIVEP3	0.0212508	0.296523		9	32	0	NA	0	NA	0
UBB	0.0212588	0.296523		6	29	0	NA	3	panPan1;orcOrc1;odoRosDiv1	0
KRT12	0.0212604	0.296523		10	36	3	nanGal1;conCri1;chrAsi1	0	NA	3
SLC10A3	0.0212686	0.296523		9	34	1	hetGla2	0	NA	1
TNFAIP3	0.0213264	0.296765		10	35	1	hetGla2	0	NA	1
IQCF1	0.021331	0.296765		9	35	3	nanGal1;hetGla2;capHir1	1	calJac3	3
GCK	0.0214056	0.297488		8	30	0	NA	0	NA	0
LGSN	0.0214536	0.297841		9	31	3	nanGal1;conCri1;chrAsi1	1	papAnu2	3
ZFP57	0.0214843	0.297953		7	35	1	nanGal1	0	NA	1
PLAC8L1	0.0217063	0.300716		10	35	0	NA	0	NA	0
37135	0.0217787	0.301397		10	34	1	hetGla2	0	NA	1
TMPRSS11F	0.0218012	0.301397		10	35	0	NA	2	orcOrc1;balAcu1	0
MLLT1	0.0218881	0.302281		10	27	0	NA	1	felCat8	0
FAM198A	0.0221121	0.304559		8	35	0	NA	0	NA	0
CD200R1	0.0221356	0.304559		5	32	0	NA	0	NA	0
HMGCLL1	0.0221496	0.304559		10	34	0	NA	0	NA	0
TPRKB	0.0221685	0.304559		10	32	1	hetGla2	0	NA	1
C7orf61	0.0221687	0.304559		8	36	1	hetGla2	1	octDeg1	1
SHARPIN	0.0222657	0.305135		9	31	0	NA	0	NA	0
ATP10A	0.022267	0.305135		6	27	1	myoDav1	0	NA	1
MYO7A	0.0222801	0.305135		8	26	2	micOch1;triMan1	0	NA	2
C16orf54	0.0223297	0.305497		10	35	0	NA	0	NA	0
SLC37A1	0.0223813	0.305885		8	32	0	NA	0	NA	0
C4orf47	0.0225104	0.307331		9	33	0	NA	0	NA	0
CORO7_PAM16	0.0225716	0.307678		8	27	0	NA	0	NA	0
C1orf74	0.0225825	0.307678		9	37	0	NA	0	NA	0
GPA33	0.0226487	0.308261		8	31	1	conCri1	0	NA	1
FAM111A	0.0227723	0.309318		5	31	3	nanGal1;conCri1;triMan1	6	panPan1;tarSyr2;rn6;turTru2;bosTau8;bisBis1	3
RBAK	0.0227733	0.309318		9	33	0	NA	0	NA	0
PPP6R1	0.0227989	0.309347		6	25	0	NA	0	NA	0
FAM208B	0.0229512	0.311092		9	32	3	eptFus1;myoDav1;myoLuc2	0	NA	1
LCE2D	0.0229871	0.311259		7	28	3	micOch1;nanGal1;conCri1	1	rhiRox1	3
DHRS1	0.0232066	0.313797		10	36	2	hetGla2;triMan1	1	cerSim1	2
EFHB	0.0232221	0.313797		7	28	0	NA	0	NA	0
FAXC	0.0232828	0.314295		8	28	0	NA	0	NA	0
KMT2D	0.0233073	0.314303		10	32	2	nanGal1;capHir1	6	macFas5;mm10;octDeg1;balAcu1;bosTau8;felCat8	2
APLN	0.0233411	0.314437		10	33	8	micOch1;nanGal1;hetGla2;capHir1;myoDav1;conCri1;triMan1;chrAsi1	15	mm10;rn6;octDeg1;oryCun2;ochPri3;vicPac2;camFer1;orcOrc1;balAcu1;panHod1;bosTau8;equCab2;cerSim1;musFur1;loxAfr3	7
EGF	0.0234563	0.31547		8	31	1	capHir1	3	panHod1;bosTau8;bisBis1	1
SEBOX	0.0234686	0.31547		10	38	5	nanGal1;hetGla2;conCri1;triMan1;chrAsi1	4	ponAbe2;calJac3;saiBol1;loxAfr3	4
ASAH2	0.0234897	0.31547		8	31	0	NA	0	NA	0
GPN2	0.0235503	0.315962		9	33	0	NA	0	NA	0
PDE4D	0.0235865	0.316126		8	30	0	NA	0	NA	0
HSF2BP	0.0236297	0.316271		8	31	0	NA	0	NA	0
NXNL1	0.0236453	0.316271		7	30	2	nanGal1;chrAsi1	1	odoRosDiv1	2
SLC16A8	0.0236924	0.31655		6	23	1	chrAsi1	0	NA	1
TRBV28	0.0237143	0.31655		7	29	1	capHir1	2	bosTau8;equCab2	1
CCNI2	0.0239898	0.319905		7	31	5	micOch1;nanGal1;myoDav1;myoLuc2;conCri1	8	otoGar3;perManBai1;mm10;rn6;vicPac2;camFer1;panHod1;musFur1	4
MEF2BNB_MEF2B	0.0240291	0.319984		8	31	0	NA	0	NA	0
CCL26	0.0240443	0.319984		9	33	3	nanGal1;hetGla2;triMan1	2	tarSyr2;ochPri3	3
MATN2	0.0241459	0.321011		9	33	0	NA	0	NA	0
COQ3	0.0241765	0.321093		9	35	0	NA	0	NA	0
PRKRIP1	0.0242683	0.321988		9	32	0	NA	0	NA	0
ALG6	0.0243783	0.323122		9	33	0	NA	0	NA	0
C12orf42	0.024473	0.324052		9	32	7	nanGal1;hetGla2;capHir1;eptFus1;myoDav1;myoLuc2;triMan1	6	octDeg1;balAcu1;panHod1;bosTau8;bisBis1;canFam3	5
CAMK1G	0.0247781	0.327763		8	32	0	NA	0	NA	0
RGR	0.0248218	0.328012		9	38	1	chrAsi1	0	NA	1
GFPT2	0.0249447	0.329305		10	32	1	hetGla2	0	NA	1
PPP1R13B	0.0251162	0.331237		8	32	0	NA	0	NA	0
KCNK2	0.0251482	0.331327		10	32	0	NA	0	NA	0
BFSP2	0.0253101	0.333128		10	30	3	nanGal1;conCri1;chrAsi1	0	NA	3
RRAD	0.0254042	0.334033		8	32	0	NA	0	NA	0
ATP1B1	0.0254841	0.334749		10	36	1	hetGla2	0	NA	1
ZBTB32	0.0255891	0.335707		10	38	0	NA	0	NA	0
PCDHGA10	0.025608	0.335707		10	31	0	NA	0	NA	0
B3GAT2	0.0258343	0.338337		9	25	0	NA	0	NA	0
GUCY2C	0.0260238	0.340209		8	32	0	NA	0	NA	0
PLCXD2	0.0260547	0.340209		10	35	0	NA	0	NA	0
SLC22A13	0.0260547	0.340209		9	32	3	hetGla2;capHir1;triMan1	7	rhiRox1;turTru2;orcOrc1;balAcu1;panHod1;bosTau8;bisBis1	3
AF165138,7	0.0260969	0.340422		10	38	7	nanGal1;hetGla2;eptFus1;myoDav1;myoLuc2;conCri1;chrAsi1	2	perManBai1;cavPor3	5
FOLR2	0.0261675	0.340877		10	36	4	nanGal1;hetGla2;eptFus1;conCri1	3	cavPor3;octDeg1;ochPri3	4
EGR4	0.0261965	0.340877		10	34	0	NA	0	NA	0
CHRNA7	0.0262094	0.340877		8	24	0	NA	0	NA	0
KLK15	0.0263236	0.342025		8	33	0	NA	4	orcOrc1;balAcu1;felCat8;musFur1	0
FGB	0.0263866	0.342506		10	37	0	NA	0	NA	0
SPATA16	0.0265182	0.343876		7	32	0	NA	0	NA	0
PRG2	0.0265992	0.344587		6	34	2	hetGla2;capHir1	5	turTru2;orcOrc1;panHod1;bosTau8;equCab2	2
LRRC66	0.0266687	0.345147		9	37	1	nanGal1	1	cavPor3	1
NAV1	0.0267304	0.345428		7	31	0	NA	1	panTro4	0
FAM200A	0.0267428	0.345428		5	30	4	nanGal1;capHir1;eptFus1;conCri1	9	mm10;vicPac2;camFer1;turTru2;orcOrc1;panHod1;musFur1;pteAle1;loxAfr3	4
NDUFA6	0.0270545	0.349112		9	37	0	NA	0	NA	0
GNAT2	0.0271614	0.349896		9	38	2	hetGla2;chrAsi1	0	NA	2
CXorf57	0.0271684	0.349896		8	31	3	nanGal1;capHir1;triMan1	4	cavPor3;octDeg1;balAcu1;panHod1	3
IMPG1	0.0272549	0.350667		10	35	5	nanGal1;hetGla2;capHir1;conCri1;chrAsi1	6	otoGar3;cavPor3;vicPac2;turTru2;orcOrc1;panHod1	5
INSL6	0.0274968	0.353435		9	35	1	hetGla2	0	NA	1
BIK	0.0276529	0.354899		7	37	0	NA	0	NA	0
ZNF672	0.0276646	0.354899		6	29	2	myoLuc2;conCri1	3	cavPor3;octDeg1;ochPri3	2
PLCD4	0.0279629	0.358256		9	34	1	chrAsi1	1	papAnu2	1
KIAA1407	0.0280442	0.358256		9	35	2	eptFus1;myoDav1	0	NA	1
TTC23L	0.0280626	0.358256		10	32	2	myoDav1;myoLuc2	0	NA	1
FRMPD2	0.0280678	0.358256		8	31	4	eptFus1;myoDav1;myoLuc2;triMan1	1	canFam3	2
HES3	0.0280838	0.358256		8	25	1	nanGal1	0	NA	1
PARD6G	0.0280894	0.358256		6	28	0	NA	0	NA	0
MST1	0.0281757	0.359008		8	34	0	NA	0	NA	0
CCDC33	0.0282619	0.359759		10	31	1	capHir1	4	balAcu1;panHod1;bosTau8;bisBis1	1
CCDC105	0.028314	0.360075		8	30	1	nanGal1	0	NA	1
SVIP	0.0285932	0.363112		8	30	0	NA	0	NA	0
ABCA2	0.028608	0.363112		6	25	1	capHir1	2	panTro4;vicPac2	1
DPEP3	0.0289242	0.366773		9	33	1	triMan1	1	balAcu1	1
GPR62	0.0291045	0.368704		7	25	1	myoLuc2	0	NA	1
DCDC2B	0.0291816	0.369325		10	37	1	triMan1	3	turTru2;orcOrc1;balAcu1	1
NFE2L1	0.0292745	0.370145		10	37	0	NA	0	NA	0
ESRP2	0.0293451	0.370682		8	34	0	NA	0	NA	0
MOV10L1	0.029446	0.371601		7	30	0	NA	0	NA	0
LIME1	0.0295991	0.373175		10	35	8	hetGla2;capHir1;eptFus1;myoDav1;myoLuc2;conCri1;triMan1;chrAsi1	18	otoGar3;speTri2;octDeg1;ochPri3;vicPac2;camFer1;turTru2;orcOrc1;balAcu1;panHod1;bosTau8;bisBis1;equCab2;cerSim1;canFam3;musFur1;odoRosDiv1;lepWed1	5
CALR3	0.029661	0.373598		10	27	1	hetGla2	0	NA	1
ASXL1	0.0297353	0.374176		9	33	1	capHir1	0	NA	1
TEX2	0.0298199	0.374882		9	35	1	hetGla2	0	NA	1
DEFB135	0.0298945	0.375143		8	31	0	NA	0	NA	0
RXFP4	0.0298975	0.375143		9	36	4	micOch1;nanGal1;myoDav1;conCri1	7	rn6;ochPri3;turTru2;orcOrc1;canFam3;musFur1;odoRosDiv1	4
PFN4	0.0299936	0.375991		10	37	3	hetGla2;eptFus1;myoLuc2	0	NA	2
BAI2	0.0301067	0.376639		9	33	1	capHir1	0	NA	1
ANKRD10	0.0301245	0.376639		8	31	0	NA	0	NA	0
C1D	0.0301311	0.376639		10	36	0	NA	0	NA	0
ARHGEF4	0.0301619	0.376666		10	30	4	eptFus1;myoDav1;myoLuc2;chrAsi1	0	NA	2
APCDD1	0.030249	0.377396		10	34	0	NA	1	papAnu2	0
ZIM2	0.0303576	0.378392		9	34	3	hetGla2;capHir1;chrAsi1	4	perManBai1;mm10;rn6;cavPor3	3
DYNC1H1	0.0306139	0.381226		7	27	1	myoDav1	2	vicPac2;pteAle1	1
NFKBIL1	0.030715	0.382125		8	33	0	NA	0	NA	0
ST6GALNAC5	0.0307697	0.382444		8	29	0	NA	0	NA	0
SYT2	0.0309043	0.383756		7	32	0	NA	0	NA	0
HRH1	0.0310899	0.385242		10	36	0	NA	0	NA	0
C21orf91	0.0310899	0.385242		10	36	0	NA	0	NA	0
C5orf66	0.0311118	0.385242		8	37	4	hetGla2;capHir1;eptFus1;myoLuc2	27	ponAbe2;rheMac3;macFas5;papAnu2;chlSab2;rhiRox1;calJac3;saiBol1;tarSyr2;otoGar3;speTri2;perManBai1;mm10;cavPor3;octDeg1;camFer1;turTru2;orcOrc1;balAcu1;bosTau8;bisBis1;equCab2;cerSim1;felCat8;canFam3;pteAle1;pteVam1	3
C11orf65	0.0311568	0.385437		9	34	1	hetGla2	0	NA	1
KIF13A	0.0313588	0.387321		6	32	0	NA	0	NA	0
URB1	0.0313679	0.387321		6	31	0	NA	0	NA	0
ARHGEF5	0.0314807	0.38787		9	34	0	NA	1	rn6	0
DDHD2	0.0315008	0.38787		9	32	0	NA	0	NA	0
IZUMO4	0.0315144	0.38787		10	26	3	eptFus1;myoDav1;myoLuc2	0	NA	1
ELMO3	0.0315301	0.38787		10	36	0	NA	0	NA	0
PRMT2	0.031594	0.38797		9	34	1	hetGla2	0	NA	1
SCD	0.0316285	0.38797		10	35	1	hetGla2	0	NA	1
TICAM2	0.0316537	0.38797		10	37	0	NA	0	NA	0
UHRF1BP1	0.031656	0.38797		10	35	0	NA	0	NA	0
KCNRG	0.0316957	0.388095		10	36	2	hetGla2;triMan1	3	otoGar3;cavPor3;octDeg1	2
ACOT13	0.0317317	0.388176		9	35	0	NA	0	NA	0
DNAAF3	0.0320831	0.391824		7	32	1	capHir1	0	NA	1
FAM71D	0.0320894	0.391824		10	37	1	hetGla2	0	NA	1
SLC14A2	0.0322103	0.392936		9	32	1	triMan1	0	NA	1
SPG11	0.0322509	0.393068		8	27	0	NA	0	NA	0
MVP	0.0322864	0.393136		9	34	1	chrAsi1	2	pteAle1;loxAfr3	1
PVR	0.0323842	0.393963		7	30	1	myoLuc2	0	NA	1
GPBP1L1	0.032444	0.394326		10	34	1	nanGal1	0	NA	1
NMRK1	0.0326244	0.395974		10	35	0	NA	0	NA	0
CCSER2	0.0326397	0.395974		10	35	0	NA	0	NA	0
RIPPLY2	0.0327325	0.396735		7	28	1	nanGal1	0	NA	1
ANG	0.0329175	0.398611		9	36	2	myoLuc2;triMan1	4	octDeg1;canFam3;lepWed1;loxAfr3	2
ZCCHC14	0.0331321	0.40084		8	24	0	NA	0	NA	0
TIMM50	0.0332917	0.402402		10	37	0	NA	0	NA	0
CLPB	0.0333406	0.402623		8	33	0	NA	0	NA	0
SEL1L2	0.0336886	0.405891		8	28	1	hetGla2	0	NA	1
DOCK9	0.0337612	0.405891		9	31	0	NA	0	NA	0
SNTB1	0.0337656	0.405891		8	21	1	capHir1	1	felCat8	1
NPVF	0.0337656	0.405891		10	37	3	eptFus1;myoDav1;myoLuc2	0	NA	1
NAT2	0.0337841	0.405891		7	20	3	nanGal1;myoDav1;triMan1	1	calJac3	3
IL1RL2	0.033796	0.405891		7	32	0	NA	0	NA	0
SLC26A8	0.0338765	0.406487		9	34	0	NA	0	NA	0
MS4A6A	0.033979	0.407345		6	27	1	triMan1	0	NA	1
ZNF346	0.0340195	0.40746		9	36	0	NA	0	NA	0
IL12RB2	0.0341726	0.408923		9	35	1	hetGla2	0	NA	1
DISC1	0.0342341	0.409162		10	30	0	NA	0	NA	0
C1orf105	0.0342547	0.409162		9	35	2	nanGal1;hetGla2	3	turTru2;orcOrc1;balAcu1	2
SYNE2	0.0343295	0.409684		7	27	1	capHir1	2	papAnu2;rn6	1
SLC52A3	0.0344376	0.41052		9	37	0	NA	0	NA	0
BLNK	0.0344647	0.41052		9	31	0	NA	0	NA	0
USP50	0.034493	0.41052		9	35	2	nanGal1;hetGla2	2	calJac3;saiBol1	2
MON1A	0.034578	0.41116		9	37	0	NA	0	NA	0
TUBB6	0.0347246	0.412201		10	33	1	hetGla2	1	turTru2	1
HIST1H2BN	0.0347453	0.412201		7	32	0	NA	0	NA	0
PHF21B	0.0347594	0.412201		6	29	0	NA	0	NA	0
PLEKHG5	0.0347922	0.412219		8	27	0	NA	0	NA	0
IZUMO3	0.0348318	0.412317		8	32	0	NA	0	NA	0
ACD	0.0349128	0.412904		10	36	2	nanGal1;hetGla2	7	speTri2;perManBai1;mm10;rn6;cavPor3;octDeg1;oryCun2	2
IGF2	0.0350518	0.414177		7	29	0	NA	0	NA	0
RPA3	0.0350999	0.414374		9	34	0	NA	0	NA	0
PPP1R15B	0.0351442	0.414525		8	31	0	NA	0	NA	0
SRCAP	0.0352043	0.414863		10	33	0	NA	0	NA	0
FAM83C	0.0353353	0.415603		9	36	0	NA	0	NA	0
FABP2	0.035358	0.415603		8	34	0	NA	0	NA	0
C3orf84	0.0353617	0.415603		10	35	0	NA	0	NA	0
PODXL2	0.0355271	0.417161		9	32	0	NA	0	NA	0
CDT1	0.0355576	0.417161		9	33	0	NA	0	NA	0
HIST1H1T	0.0355897	0.417165		9	38	1	hetGla2	0	NA	1
CRTAM	0.0356689	0.417574		9	32	0	NA	0	NA	0
ABCB8	0.0357124	0.417574		8	37	0	NA	0	NA	0
IL5	0.0357196	0.417574		10	38	0	NA	0	NA	0
POLH	0.0358014	0.418153		10	33	1	nanGal1	0	NA	1
NECAB2	0.035852	0.418153		10	31	0	NA	0	NA	0
CCL1	0.0358792	0.418153		10	36	3	eptFus1;myoDav1;myoLuc2	0	NA	1
PCDHGA11	0.0358961	0.418153		10	31	1	hetGla2	0	NA	1
LRP2BP	0.0362646	0.422072		10	35	1	hetGla2	0	NA	1
GPR155	0.0363237	0.422387		10	34	0	NA	0	NA	0
OTOS	0.0365857	0.425059		9	33	1	conCri1	0	NA	1
PDCD2L	0.0366238	0.425126		8	35	0	NA	0	NA	0
KRBA1	0.0367587	0.426317		8	36	2	triMan1;chrAsi1	2	orcOrc1;loxAfr3	1
GABRR2	0.0367956	0.426369		10	35	2	nanGal1;chrAsi1	0	NA	2
NAV2	0.0369854	0.428192		9	28	1	capHir1	0	NA	1
TSFM	0.0371477	0.429519		9	34	0	NA	0	NA	0
DENND1A	0.0371832	0.429519		8	28	0	NA	0	NA	0
THEGL	0.0372093	0.429519		8	27	0	NA	0	NA	0
HAGHL	0.0372304	0.429519		8	32	4	hetGla2;myoDav1;triMan1;chrAsi1	3	tarSyr2;otoGar3;loxAfr3	3
FAM64A	0.0373127	0.429859		10	37	0	NA	0	NA	0
UXT	0.0373543	0.429859		9	35	0	NA	0	NA	0
C1orf185	0.0373578	0.429859		9	35	1	hetGla2	0	NA	1
PPP6R2	0.0374225	0.430228		9	28	1	conCri1	0	NA	1
VPS72	0.0374937	0.430423		10	33	0	NA	0	NA	0
TAF7L	0.0375279	0.430423		10	34	3	nanGal1;hetGla2;conCri1	2	octDeg1;felCat8	3
TRH	0.0375375	0.430423		8	29	1	hetGla2	1	balAcu1	1
FASN	0.0376236	0.431036		7	30	2	micOch1;myoDav1	0	NA	2
BIRC7	0.0377074	0.431621		5	35	3	nanGal1;hetGla2;chrAsi1	2	ochPri3;loxAfr3	3
ZFP69	0.0377714	0.431978		9	36	1	chrAsi1	0	NA	1
RNF135	0.0379886	0.43371		6	25	2	hetGla2;conCri1	3	turTru2;balAcu1;felCat8	2
SPOCD1	0.037992	0.43371		8	34	8	micOch1;nanGal1;hetGla2;capHir1;eptFus1;myoDav1;myoLuc2;conCri1	19	calJac3;saiBol1;perManBai1;octDeg1;oryCun2;ochPri3;vicPac2;camFer1;turTru2;orcOrc1;balAcu1;panHod1;equCab2;cerSim1;felCat8;musFur1;odoRosDiv1;pteAle1;pteVam1	6
PSMA8	0.0380217	0.43371		9	35	0	NA	0	NA	0
LCE4A	0.0380607	0.43378		6	28	4	micOch1;capHir1;myoDav1;conCri1	6	rhiRox1;tarSyr2;octDeg1;ochPri3;canFam3;pteVam1	4
VWCE	0.0382321	0.434476		6	31	0	NA	0	NA	0
CEP250	0.0382381	0.434476		9	34	1	capHir1	0	NA	1
KRTAP16_1	0.0382422	0.434476		9	29	1	capHir1	0	NA	1
EPHX2	0.0382537	0.434476		7	32	0	NA	0	NA	0
MTFR1	0.0383401	0.435082		10	33	4	capHir1;eptFus1;myoDav1;myoLuc2	1	panHod1	2
RPS17	0.0384335	0.435767		7	36	1	myoDav1	0	NA	1
CACNA1E	0.0384908	0.436042		7	22	0	NA	0	NA	0
NRIP1	0.0386953	0.437981		9	34	0	NA	0	NA	0
CNGA1	0.0387357	0.438063		10	34	0	NA	0	NA	0
SLC5A9	0.0388907	0.439438		10	38	1	nanGal1	0	NA	1
APOBEC3H	0.0389364	0.439577		7	36	1	eptFus1	0	NA	1
RNF111	0.0389913	0.43982		10	36	0	NA	0	NA	0
PLGRKT	0.0390734	0.440067		10	36	1	triMan1	0	NA	1
OTOL1	0.03908	0.440067		8	33	0	NA	0	NA	0
CALY	0.0392807	0.44195		5	20	1	triMan1	0	NA	1
GGA3	0.0394107	0.443034		10	35	0	NA	0	NA	0
ATP1A4	0.039625	0.444791		8	34	2	nanGal1;hetGla2	2	orcOrc1;balAcu1	2
REST	0.0396345	0.444791		8	27	4	capHir1;eptFus1;myoDav1;myoLuc2	1	bisBis1	2
HSD17B1	0.0396842	0.44497		7	30	0	NA	0	NA	0
BEX5	0.0397214	0.445008		7	30	1	nanGal1	1	mm10	1
LCE3E	0.0397715	0.445191		7	30	1	conCri1	1	otoGar3	1
BMPER	0.0398273	0.445342		8	33	1	eptFus1	0	NA	1
CCER1	0.0398526	0.445342		8	33	0	NA	0	NA	0
GRHL3	0.0399929	0.446531		10	36	0	NA	0	NA	0
ACRBP	0.0400662	0.44697		9	35	0	NA	0	NA	0
CBY3	0.0401144	0.44713		7	28	0	NA	0	NA	0
PEAR1	0.0402157	0.447644		9	29	0	NA	0	NA	0
CPN1	0.0402285	0.447644		8	30	0	NA	0	NA	0
SLC18B1	0.0403184	0.448265		9	33	1	triMan1	0	NA	1
CEP63	0.0403722	0.448486		9	32	1	triMan1	0	NA	1
PLEKHS1	0.0404599	0.449082		10	38	1	conCri1	0	NA	1
CABP5	0.0405719	0.449945		7	37	1	conCri1	0	NA	1
SNF8	0.0407575	0.45137		9	31	0	NA	0	NA	0
QPCTL	0.0407741	0.45137		10	35	1	chrAsi1	0	NA	1
OAS3	0.0408032	0.45137		7	32	2	nanGal1;hetGla2	3	camFer1;bosTau8;lepWed1	2
HIST4H4	0.0409128	0.452203		8	38	2	myoDav1;myoLuc2	3	camFer1;pteAle1;pteVam1	1
CYP51A1	0.0410206	0.452513		9	36	0	NA	0	NA	0
HCLS1	0.0410305	0.452513		10	35	0	NA	0	NA	0
TRAPPC12	0.0410442	0.452513		7	28	1	myoDav1	0	NA	1
C16orf96	0.0410782	0.452513		10	33	6	hetGla2;eptFus1;myoDav1;myoLuc2;conCri1;triMan1	19	panPan1;ponAbe2;calJac3;tarSyr2;octDeg1;oryCun2;ochPri3;vicPac2;camFer1;turTru2;orcOrc1;equCab2;cerSim1;felCat8;canFam3;musFur1;odoRosDiv1;pteAle1;loxAfr3	4
EME2	0.0414057	0.455739		6	28	2	nanGal1;hetGla2	4	turTru2;orcOrc1;balAcu1;loxAfr3	2
RLBP1	0.0415202	0.456541		7	35	1	myoDav1	0	NA	1
LETM2	0.0416566	0.456541		10	34	2	nanGal1;hetGla2	0	NA	2
WNT6	0.0416734	0.456541		8	29	0	NA	0	NA	0
AMOTL2	0.0416807	0.456541		9	34	0	NA	0	NA	0
TMPRSS12	0.0416852	0.456541		9	34	1	hetGla2	0	NA	1
IL7R	0.0416864	0.456541		10	34	0	NA	0	NA	0
LCT	0.0418648	0.458114		8	28	1	triMan1	0	NA	1
CAMK2G	0.0421243	0.460571		10	35	0	NA	0	NA	0
KRTAP1_5	0.0421691	0.460678		7	31	1	micOch1	2	pteAle1;pteVam1	1
TNFSF11	0.0422074	0.460715		9	35	0	NA	0	NA	0
FBXO17	0.0422717	0.460867		7	27	2	micOch1;nanGal1	0	NA	2
PRAMEF12	0.0422913	0.460867		5	27	4	nanGal1;hetGla2;capHir1;eptFus1	9	calJac3;tarSyr2;cavPor3;balAcu1;panHod1;bosTau8;bisBis1;equCab2;canFam3	4
TM6SF1	0.0423504	0.460987		7	35	1	myoLuc2	0	NA	1
ARSJ	0.0423723	0.460987		8	32	0	NA	0	NA	0
C6orf226	0.0424111	0.461028		8	33	0	NA	0	NA	0
CRYZ	0.0424942	0.461551		9	35	0	NA	0	NA	0
IRAK4	0.0425789	0.462089		10	34	0	NA	0	NA	0
NME6	0.042752	0.463587		7	37	0	NA	0	NA	0
C7orf72	0.0428948	0.464753		7	29	1	hetGla2	0	NA	1
RNF157	0.0430005	0.465515		8	34	0	NA	2	papAnu2;rn6	0
ANKRD7	0.0431615	0.466874		9	30	3	micOch1;nanGal1;capHir1	6	tarSyr2;cavPor3;bosTau8;bisBis1;equCab2;cerSim1	3
RCN2	0.0431985	0.466891		7	36	0	NA	0	NA	0
SLC5A2	0.0435412	0.470209		9	36	0	NA	0	NA	0
TEX101	0.0436196	0.47067		9	35	0	NA	0	NA	0
TESK1	0.043706	0.471216		9	36	0	NA	0	NA	0
GABRD	0.0437842	0.471348		7	31	0	NA	0	NA	0
ZMYM6NB	0.0438122	0.471348		9	34	1	micOch1	1	canFam3	1
CEBPZ	0.0438256	0.471348		10	34	1	hetGla2	0	NA	1
DDIT4L	0.0439128	0.471901		9	37	1	hetGla2	0	NA	1
TCP11	0.0439769	0.472205		9	36	1	chrAsi1	0	NA	1
SMARCC2	0.0442181	0.474408		8	33	0	NA	0	NA	0
SIVA1	0.0442703	0.474429		7	29	0	NA	0	NA	0
MROH1	0.044292	0.474429		9	27	1	capHir1	2	panTro4;canFam3	1
PLAGL2	0.0444035	0.4746		9	38	0	NA	0	NA	0
PLA2G6	0.0444157	0.4746		9	32	0	NA	0	NA	0
LYZL4	0.0444161	0.4746		10	35	1	hetGla2	0	NA	1
PPP1R36	0.0445982	0.475887		8	33	0	NA	0	NA	0
GGPS1	0.0446607	0.475887		10	37	0	NA	0	NA	0
GPATCH11	0.044681	0.475887		8	36	0	NA	0	NA	0
BLM	0.044681	0.475887		7	31	0	NA	0	NA	0
MAPKBP1	0.0447613	0.476357		10	33	0	NA	0	NA	0
PDE8A	0.0448681	0.477108		6	31	0	NA	0	NA	0
SERINC4	0.0449107	0.477177		10	37	4	nanGal1;conCri1;triMan1;chrAsi1	3	cavPor3;octDeg1;balAcu1	3
FITM2	0.0449644	0.477362		9	34	0	NA	0	NA	0
BSPH1	0.0450194	0.477561		7	29	0	NA	0	NA	0
PSTPIP1	0.0451235	0.47828		10	33	0	NA	0	NA	0
PDE8B	0.045186	0.478557		10	32	0	NA	0	NA	0
KIAA1549L	0.0455147	0.481651		8	32	1	capHir1	0	NA	1
ISY1_RAB43	0.0457251	0.483489		10	30	0	NA	1	camFer1	0
SMIM24	0.0462955	0.489129		10	29	0	NA	0	NA	0
CNOT11	0.046394	0.489776		7	24	0	NA	0	NA	0
NANOS3	0.0464485	0.489959		9	37	0	NA	0	NA	0
INO80B_WBP1	0.046543	0.490149		10	34	0	NA	0	NA	0
CFAP97	0.0465432	0.490149		9	38	0	NA	0	NA	0
HACL1	0.0465781	0.490149		10	33	1	hetGla2	0	NA	1
POLR2I	0.0466215	0.490214		9	38	0	NA	0	NA	0
CLIC6	0.0468456	0.492178		6	21	2	capHir1;chrAsi1	2	chlSab2;cavPor3	2
SIT1	0.0470189	0.493405		10	38	0	NA	0	NA	0
DPPA4	0.0470373	0.493405		10	32	0	NA	1	panPan1	0
ZAR1L	0.0473365	0.496149		8	31	1	chrAsi1	0	NA	1
PDE5A	0.0474737	0.497191		6	33	0	NA	0	NA	0
ARL16	0.0476641	0.498788		7	33	1	chrAsi1	0	NA	1
CTD_2116N17,1	0.0479733	0.501261		10	37	3	capHir1;myoDav1;myoLuc2	3	cavPor3;camFer1;balAcu1	2
NXPE4	0.0479765	0.501261		6	33	2	capHir1;conCri1	5	panHod1;bosTau8;bisBis1;felCat8;musFur1	2
VNN1	0.0481475	0.502315		10	35	0	NA	0	NA	0
ALDH3A2	0.0481536	0.502315		9	36	0	NA	0	NA	0
SSR1	0.0482879	0.503318		9	37	0	NA	0	NA	0
B3GALT5	0.0483411	0.503474		10	35	1	micOch1	0	NA	1
HIST2H2BE	0.0484036	0.503726		10	38	0	NA	0	NA	0
DFFA	0.0485573	0.504681		10	34	0	NA	0	NA	0
DHRS7	0.0485719	0.504681		9	36	0	NA	0	NA	0
SLC5A11	0.0487206	0.505826		7	34	0	NA	0	NA	0
GJA8	0.0488141	0.506398		6	35	1	chrAsi1	0	NA	1
RGS11	0.0490015	0.507564		8	29	4	micOch1;nanGal1;hetGla2;chrAsi1	4	perManBai1;mm10;cavPor3;loxAfr3	4
PPFIA1	0.0490369	0.507564		8	30	0	NA	1	panPan1	0
CYP4A11	0.0490421	0.507564		7	30	2	hetGla2;capHir1	4	equCab2;cerSim1;felCat8;loxAfr3	2
LCTL	0.0491017	0.507782		10	34	3	nanGal1;hetGla2;chrAsi1	1	vicPac2	3
SELV	0.0492295	0.508705		6	27	0	NA	0	NA	0
GPR19	0.0502202	0.518535		10	37	0	NA	0	NA	0
COCH	0.0502747	0.518692		10	37	0	NA	0	NA	0
INTS4	0.05074	0.523082		7	31	1	myoLuc2	0	NA	1
RTN2	0.0508514	0.523821		9	37	1	hetGla2	0	NA	1
INO80B	0.0509103	0.524018		10	34	0	NA	0	NA	0
MMRN2	0.0509881	0.52441		7	26	0	NA	0	NA	0
HMHA1	0.0511189	0.525344		9	26	0	NA	1	orcOrc1	0
LEKR1	0.0512779	0.526568		10	33	1	hetGla2	0	NA	1
DXO	0.0514769	0.528199		9	38	1	nanGal1	0	NA	1
SMARCE1	0.0515674	0.528204		9	34	0	NA	0	NA	0
FMO3	0.0515876	0.528204		6	32	2	triMan1;chrAsi1	1	tarSyr2	1
SLC35G6	0.0515976	0.528204		9	35	2	eptFus1;myoLuc2	1	vicPac2	1
HSD11B1	0.0522773	0.534275		9	35	0	NA	0	NA	0
SLC4A2	0.0522846	0.534275		8	33	1	nanGal1	0	NA	1
CH17_140K24,8	0.0523395	0.534275		10	35	4	nanGal1;myoLuc2;triMan1;chrAsi1	2	equCab2;cerSim1	3
MDN1	0.0523529	0.534275		8	34	0	NA	2	rn6;turTru2	0
ZNF215	0.0524317	0.534665		10	34	4	micOch1;nanGal1;hetGla2;triMan1	4	tarSyr2;mm10;octDeg1;oryCun2	4
RP11_192H23,4	0.052707	0.537057		10	38	1	nanGal1	0	NA	1
LRIF1	0.0527918	0.537427		10	35	0	NA	0	NA	0
RIMBP3B	0.0528371	0.537427		8	25	0	NA	0	NA	0
TNFSF4	0.0528657	0.537427		10	34	0	NA	0	NA	0
TOP1MT	0.0530715	0.539103		6	37	5	hetGla2;capHir1;eptFus1;myoDav1;triMan1	18	calJac3;saiBol1;speTri2;ochPri3;vicPac2;camFer1;turTru2;orcOrc1;bosTau8;bisBis1;felCat8;canFam3;musFur1;odoRosDiv1;lepWed1;pteAle1;pteVam1;loxAfr3	4
KIF1A	0.0531459	0.5393		8	29	0	NA	1	vicPac2	0
PER1	0.0532179	0.5393		9	32	1	capHir1	0	NA	1
MT1E	0.0532222	0.5393		6	28	2	nanGal1;myoDav1	4	mm10;cavPor3;oryCun2;camFer1	2
ALOX15	0.0532546	0.5393		9	30	3	nanGal1;hetGla2;triMan1	3	vicPac2;orcOrc1;equCab2	3
SLC1A7	0.0534105	0.540464		8	31	1	nanGal1	0	NA	1
LRCH1	0.0535264	0.541221		10	33	0	NA	0	NA	0
S100Z	0.0536557	0.541447		10	38	3	eptFus1;myoDav1;myoLuc2	9	rheMac3;macFas5;papAnu2;chlSab2;rhiRox1;turTru2;orcOrc1;musFur1;pteAle1	1
ECH1	0.0536715	0.541447		10	30	0	NA	0	NA	0
RPP21	0.0537098	0.541447		9	35	1	triMan1	0	NA	1
RIMBP3C	0.0537951	0.541447		8	27	0	NA	0	NA	0
SLC51B	0.0538471	0.541447		8	38	0	NA	0	NA	0
GUCA1C	0.0538717	0.541447		9	36	7	nanGal1;hetGla2;capHir1;eptFus1;myoDav1;triMan1;chrAsi1	11	perManBai1;mm10;rn6;cavPor3;octDeg1;oryCun2;vicPac2;camFer1;orcOrc1;panHod1;loxAfr3	5
HIST1H3E	0.0539065	0.541447		7	29	0	NA	0	NA	0
C4orf33	0.0539447	0.541447		8	34	1	nanGal1	0	NA	1
ZNF621	0.0539521	0.541447		10	33	2	micOch1;nanGal1	1	mm10	2
CAMK2B	0.0539597	0.541447		8	30	0	NA	0	NA	0
MYH3	0.0540052	0.54149		10	32	0	NA	1	panPan1	0
C14orf79	0.0541314	0.541525		8	31	2	myoDav1;conCri1	2	otoGar3;ochPri3	2
GGT5	0.0541486	0.541525		8	32	1	capHir1	1	camFer1	1
NEK10	0.0541668	0.541525		10	28	0	NA	0	NA	0
KRT35	0.0541909	0.541525		10	34	0	NA	1	turTru2	0
SLC30A2	0.0542141	0.541525		10	35	1	micOch1	0	NA	1
DAK	0.0543518	0.542488		9	35	1	myoLuc2	0	NA	1
PCDHGB7	0.0544869	0.543425		6	25	1	nanGal1	0	NA	1
RDH8	0.0546801	0.544939		10	33	0	NA	0	NA	0
CCDC185	0.0547861	0.545584		7	30	3	nanGal1;hetGla2;conCri1	2	cavPor3;octDeg1	3
TAF4B	0.0548599	0.545906		8	30	1	nanGal1	0	NA	1
GDF5OS	0.0549061	0.545954		9	36	0	NA	1	ochPri3	0
TAS2R9	0.0549529	0.546007		5	30	3	nanGal1;hetGla2;capHir1	7	panPan1;tarSyr2;otoGar3;octDeg1;panHod1;bosTau8;bisBis1	3
KRTAP26_1	0.0550479	0.546464		7	35	0	NA	0	NA	0
ACSBG2	0.0551116	0.546464		6	31	1	hetGla2	1	otoGar3	1
ROS1	0.0551234	0.546464		9	30	1	hetGla2	0	NA	1
OAS2	0.0556885	0.550899		8	34	0	NA	2	turTru2;orcOrc1	0
LGR4	0.0557172	0.550899		10	34	1	hetGla2	0	NA	1
SPATS1	0.0557334	0.550899		9	36	0	NA	0	NA	0
CXCR1	0.055738	0.550899		8	34	1	myoLuc2	0	NA	1
PFKFB1	0.0558793	0.551881		10	28	1	triMan1	0	NA	1
UBE2E2	0.0560196	0.552852		7	30	1	chrAsi1	0	NA	1
KRT72	0.0561032	0.553263		7	31	0	NA	0	NA	0
GCKR	0.0561542	0.553339		9	34	8	nanGal1;capHir1;eptFus1;myoDav1;myoLuc2;conCri1;triMan1;chrAsi1	15	rhiRox1;tarSyr2;ochPri3;vicPac2;camFer1;orcOrc1;balAcu1;panHod1;bosTau8;bisBis1;felCat8;musFur1;odoRosDiv1;pteAle1;pteVam1	5
ZFP3	0.0561949	0.553339		10	34	0	NA	0	NA	0
GJA9	0.0562403	0.553373		9	38	7	nanGal1;hetGla2;eptFus1;myoDav1;myoLuc2;conCri1;chrAsi1	8	papAnu2;perManBai1;mm10;rn6;cavPor3;octDeg1;ochPri3;lepWed1	5
CCDC148	0.0562914	0.553462		10	34	0	NA	0	NA	0
AGFG2	0.056381	0.553929		9	36	1	micOch1	0	NA	1
CCT6B	0.0567963	0.557113		9	31	2	nanGal1;hetGla2	2	calJac3;balAcu1	2
TMPRSS3	0.0568148	0.557113		9	32	1	micOch1	0	NA	1
SDF4	0.0568456	0.557113		7	31	0	NA	0	NA	0
TREML1	0.0569203	0.557113		7	36	1	hetGla2	2	rn6;octDeg1	1
CRISP2	0.0569496	0.557113		8	34	1	hetGla2	0	NA	1
ADAM28	0.0569587	0.557113		7	33	0	NA	0	NA	0
EPPIN_WFDC6	0.0570863	0.557946		10	36	3	nanGal1;hetGla2;conCri1	1	canFam3	3
C4orf46	0.0571763	0.558412		8	35	1	hetGla2	0	NA	1
IFT57	0.057363	0.559821		10	35	0	NA	0	NA	0
EXOC3L1	0.0574368	0.560126		9	37	0	NA	1	papAnu2	0
COL6A1	0.0575997	0.560975		7	28	0	NA	2	papAnu2;vicPac2	0
LIPT1	0.0576107	0.560975		9	36	2	eptFus1;myoLuc2	0	NA	1
BLID	0.0576696	0.560975		6	34	5	micOch1;nanGal1;hetGla2;capHir1;conCri1	26	ponAbe2;rheMac3;macFas5;papAnu2;rhiRox1;calJac3;saiBol1;tarSyr2;otoGar3;speTri2;perManBai1;mm10;cavPor3;octDeg1;oryCun2;vicPac2;camFer1;bosTau8;bisBis1;equCab2;cerSim1;canFam3;musFur1;odoRosDiv1;lepWed1;pteAle1	5
CASP8	0.0576942	0.560975		9	35	2	eptFus1;myoDav1	0	NA	1
SLC47A1	0.0578365	0.561944		5	32	1	triMan1	1	calJac3	1
TRIM47	0.0578889	0.561987		7	22	2	capHir1;myoDav1	2	balAcu1;panHod1	2
RASGRF1	0.0579263	0.561987		5	30	1	myoDav1	0	NA	1
HRSP12	0.0580086	0.562126		10	37	0	NA	0	NA	0
C14orf169	0.058026	0.562126		8	25	0	NA	0	NA	0
HSPG2	0.0582819	0.564192		9	28	2	nanGal1;capHir1	2	panTro4;vicPac2	2
COMMD3_BMI1	0.0583563	0.564343		10	35	0	NA	0	NA	0
PPBP	0.0583833	0.564343		9	38	0	NA	3	tarSyr2;mm10;ochPri3	0
GAL	0.0588963	0.568583		7	28	0	NA	0	NA	0
YRDC	0.0589082	0.568583		6	20	0	NA	0	NA	0
RNF151	0.0589985	0.568645		10	35	0	NA	0	NA	0
LINS	0.059001	0.568645		9	37	0	NA	0	NA	0
SPAG11B	0.0591576	0.568703		8	35	1	hetGla2	2	tarSyr2;perManBai1	1
DCP1B	0.0591594	0.568703		9	30	1	chrAsi1	0	NA	1
HAUS6	0.0591625	0.568703		8	33	0	NA	0	NA	0
GRIN1	0.0591796	0.568703		7	22	0	NA	0	NA	0
TRIM44	0.0592417	0.568885		7	24	1	conCri1	0	NA	1
SCP2D1	0.0595071	0.571016		10	38	1	conCri1	0	NA	1
GTSE1	0.059638	0.571857		7	29	1	conCri1	1	speTri2	1
COX18	0.0597142	0.572171		9	35	1	hetGla2	0	NA	1
RP11_45M22,4	0.0599271	0.573666		10	37	4	hetGla2;eptFus1;triMan1;chrAsi1	15	octDeg1;vicPac2;camFer1;orcOrc1;balAcu1;equCab2;cerSim1;felCat8;canFam3;musFur1;odoRosDiv1;lepWed1;pteAle1;pteVam1;loxAfr3	3
SEC61A2	0.0599574	0.573666		10	37	0	NA	0	NA	0
ZNF735	0.0602073	0.575504		6	24	3	hetGla2;capHir1;myoDav1	8	panTro4;calJac3;perManBai1;mm10;balAcu1;odoRosDiv1;lepWed1;pteAle1	3
TRMT1L	0.0602547	0.575504		9	32	1	nanGal1	0	NA	1
DDX46	0.0603548	0.575504		9	31	0	NA	0	NA	0
NUDT14	0.0603585	0.575504		7	35	1	eptFus1	1	ochPri3	1
TRABD2A	0.0603836	0.575504		10	34	7	micOch1;nanGal1;capHir1;myoDav1;myoLuc2;triMan1;chrAsi1	16	tarSyr2;otoGar3;speTri2;perManBai1;mm10;rn6;cavPor3;octDeg1;vicPac2;camFer1;orcOrc1;panHod1;bosTau8;bisBis1;pteAle1;pteVam1	5
PFKFB2	0.0604535	0.575504		9	37	0	NA	0	NA	0
TEDDM1	0.0604552	0.575504		10	27	1	hetGla2	0	NA	1
LEFTY1	0.0605219	0.575723		5	23	2	myoLuc2;chrAsi1	1	musFur1	2
PPP4R1	0.0606481	0.576507		8	33	1	nanGal1	0	NA	1
NUDT16L1	0.0608043	0.577536		8	27	0	NA	0	NA	0
ZNF250	0.060844	0.577536		5	27	2	capHir1;chrAsi1	0	NA	2
C4orf51	0.0610254	0.578587		10	37	4	micOch1;nanGal1;hetGla2;conCri1	6	turTru2;orcOrc1;balAcu1;cerSim1;canFam3;odoRosDiv1	4
C1orf101	0.0610426	0.578587		6	29	0	NA	0	NA	0
NR1I3	0.0612862	0.580478		10	38	3	eptFus1;myoDav1;conCri1	3	turTru2;orcOrc1;balAcu1	2
LHFPL5	0.0614107	0.58124		10	36	0	NA	0	NA	0
KIF17	0.0615142	0.581802		9	34	0	NA	1	speTri2	0
AKAP7	0.0616657	0.582746		9	33	0	NA	0	NA	0
ADAM33	0.0617119	0.582746		7	32	0	NA	0	NA	0
DEFB104B	0.0617467	0.582746		9	29	2	micOch1;nanGal1	3	tarSyr2;perManBai1;rn6	2
ZHX1_C8orf76	0.0619802	0.584531		9	34	0	NA	0	NA	0
HOXD1	0.0620856	0.585105		5	25	0	NA	0	NA	0
C15orf52	0.0622481	0.586218		10	37	1	capHir1	1	orcOrc1	1
IGSF11	0.0625183	0.588255		8	34	2	myoLuc2;conCri1	0	NA	2
PLA2G12A	0.0625582	0.588255		7	31	0	NA	0	NA	0
SOHLH2	0.0626421	0.588255		8	37	0	NA	0	NA	0
SPATC1L	0.062643	0.588255		9	28	1	hetGla2	0	NA	1
LY9	0.0627696	0.588522		6	33	3	micOch1;nanGal1;capHir1	9	rheMac3;macFas5;papAnu2;chlSab2;saiBol1;cavPor3;octDeg1;oryCun2;panHod1	3
TUBB1	0.0627992	0.588522		9	36	0	NA	0	NA	0
IFI6	0.0628055	0.588522		8	35	4	micOch1;nanGal1;hetGla2;conCri1	7	speTri2;perManBai1;mm10;rn6;cavPor3;octDeg1;ochPri3	4
HDAC10	0.0630757	0.590634		9	32	1	myoDav1	1	ochPri3	1
PLEKHH3	0.0631919	0.591302		8	22	1	capHir1	0	NA	1
GPR17	0.0634519	0.593314		7	38	0	NA	0	NA	0
UBAP1L	0.0638195	0.596328		5	26	1	chrAsi1	1	bosTau8	1
FGD6	0.0639558	0.597178		9	32	0	NA	0	NA	0
ATP6V1E2	0.0641427	0.598171		10	38	0	NA	0	NA	0
ZNF34	0.064153	0.598171		6	26	1	nanGal1	1	mm10	1
DECR1	0.0642816	0.598947		10	35	1	nanGal1	0	NA	1
B3GNT4	0.0643618	0.59927		7	37	2	nanGal1;conCri1	3	cavPor3;octDeg1;odoRosDiv1	2
NRDE2	0.0644468	0.599637		8	33	1	triMan1	1	canFam3	1
GZMH	0.0645043	0.599749		7	35	3	eptFus1;myoLuc2;triMan1	2	bisBis1;cerSim1	2
KAAG1	0.0645893	0.600116		8	35	2	myoLuc2;chrAsi1	6	saiBol1;vicPac2;camFer1;turTru2;orcOrc1;balAcu1	2
VPREB1	0.0646384	0.600149		8	22	0	NA	1	panHod1	0
STX10	0.0647638	0.600405		9	35	3	micOch1;hetGla2;conCri1	5	perManBai1;mm10;rn6;cavPor3;octDeg1	3
RGAG4	0.0647817	0.600405		7	29	1	chrAsi1	1	speTri2	1
ARPC2	0.064861	0.600405		10	37	1	hetGla2	0	NA	1
ARV1	0.0648829	0.600405		10	37	0	NA	0	NA	0
FAM118B	0.0648938	0.600405		9	33	0	NA	0	NA	0
TMEM98	0.0651292	0.600768		10	37	0	NA	0	NA	0
MUSTN1	0.0651357	0.600768		10	37	0	NA	0	NA	0
DEFB1	0.06514	0.600768		6	32	1	triMan1	0	NA	1
GPHB5	0.0651575	0.600768		10	37	1	nanGal1	0	NA	1
APITD1	0.065161	0.600768		10	37	0	NA	0	NA	0
KLHL23	0.0655818	0.604112		10	37	0	NA	0	NA	0
DEFA6	0.0656155	0.604112		6	20	3	micOch1;triMan1;chrAsi1	4	tarSyr2;perManBai1;cavPor3;cerSim1	2
CCDC116	0.0660029	0.607254		8	34	2	hetGla2;myoDav1	0	NA	2
TREH	0.0663584	0.610099		7	35	2	hetGla2;myoLuc2	2	odoRosDiv1;lepWed1	2
GP1BA	0.0664153	0.610196		7	28	1	micOch1	2	vicPac2;turTru2	1
LCE2A	0.0665828	0.611309		5	28	2	conCri1;chrAsi1	0	NA	2
SYCP3	0.0669189	0.613929		8	36	0	NA	0	NA	0
CCDC54	0.0669613	0.613929		9	36	2	nanGal1;hetGla2	3	orcOrc1;balAcu1;felCat8	2
FAM227B	0.0670853	0.614415		10	26	1	hetGla2	0	NA	1
UBE2K	0.0673344	0.614415		10	36	0	NA	0	NA	0
GNA14	0.0673344	0.614415		10	36	0	NA	0	NA	0
FAM154A	0.067335	0.614415		10	36	0	NA	0	NA	0
WDR77	0.0673352	0.614415		10	36	0	NA	0	NA	0
MAP1S	0.0673377	0.614415		8	26	2	nanGal1;hetGla2	2	cavPor3;octDeg1	2
TAS1R2	0.0673451	0.614415		10	32	1	conCri1	6	turTru2;orcOrc1;balAcu1;felCat8;odoRosDiv1;lepWed1	1
PCNX	0.0673874	0.614415		9	29	0	NA	0	NA	0
PTPRS	0.0676656	0.616524		7	24	0	NA	0	NA	0
FOXR1	0.0680384	0.619492		9	37	0	NA	0	NA	0
OS9	0.0681663	0.620229		9	33	0	NA	0	NA	0
CARS	0.0684455	0.622116		6	30	0	NA	0	NA	0
ZC3H4	0.0684681	0.622116		7	20	1	chrAsi1	1	panPan1	1
ULK1	0.0686965	0.623215		9	29	0	NA	1	turTru2	0
NUP93	0.0687271	0.623215		9	36	0	NA	0	NA	0
PIN4	0.0687311	0.623215		9	31	0	NA	0	NA	0
SPECC1	0.0688591	0.623479		6	31	0	NA	0	NA	0
RABL3	0.0689015	0.623479		10	35	0	NA	0	NA	0
ABHD16B	0.0689358	0.623479		7	24	0	NA	1	orcOrc1	0
C1orf177	0.0689495	0.623479		10	38	2	nanGal1;hetGla2	2	turTru2;balAcu1	2
CCDC175	0.0691559	0.624772		7	36	1	hetGla2	0	NA	1
INSR	0.0692122	0.624772		8	30	0	NA	0	NA	0
ZNF529	0.0692347	0.624772		5	32	3	eptFus1;conCri1;chrAsi1	3	cavPor3;octDeg1;oryCun2	3
SAA1	0.0693994	0.625412		8	30	3	nanGal1;hetGla2;conCri1	4	cavPor3;vicPac2;orcOrc1;bisBis1	3
RAVER1	0.0694384	0.625412		10	32	0	NA	0	NA	0
ZNF280D	0.069481	0.625412		10	32	0	NA	0	NA	0
TBXA2R	0.0695312	0.625412		9	30	0	NA	0	NA	0
TNFRSF21	0.069543	0.625412		8	35	0	NA	0	NA	0
ATP6V1F	0.0697185	0.625859		10	35	0	NA	0	NA	0
TXNL4A	0.0697224	0.625859		9	33	0	NA	0	NA	0
CLEC12A	0.0697708	0.625859		9	30	1	triMan1	0	NA	1
ZNF324	0.0697827	0.625859		5	27	1	triMan1	1	cavPor3	1
HGFAC	0.0699613	0.627034		7	32	1	capHir1	0	NA	1
CWC25	0.0700817	0.627603		10	35	0	NA	0	NA	0
C7orf25	0.0701201	0.627603		10	36	0	NA	0	NA	0
PTGER1	0.0702229	0.628097		7	23	0	NA	0	NA	0
LUZP4	0.0705564	0.630652		7	26	5	nanGal1;hetGla2;eptFus1;myoDav1;myoLuc2	5	papAnu2;mm10;cavPor3;panHod1;bosTau8	3
APOL3	0.0707448	0.631485		9	25	1	nanGal1	2	calJac3;cerSim1	1
POLR2C	0.0707455	0.631485		9	37	0	NA	0	NA	0
RP3_468K18,7	0.0708498	0.631675		10	35	0	NA	0	NA	0
MED16	0.0708627	0.631675		10	27	0	NA	0	NA	0
BTNL2	0.0709284	0.631708		6	32	1	myoDav1	7	chlSab2;calJac3;tarSyr2;cerSim1;pteAle1;pteVam1;loxAfr3	1
PSD4	0.0709623	0.631708		9	34	5	hetGla2;capHir1;conCri1;triMan1;chrAsi1	12	tarSyr2;speTri2;perManBai1;octDeg1;oryCun2;vicPac2;camFer1;bosTau8;bisBis1;pteAle1;pteVam1;loxAfr3	4
ALOX15B	0.0712671	0.633959		5	30	1	hetGla2	3	calJac3;vicPac2;balAcu1	1
ITFG3	0.0713114	0.633959		8	32	1	chrAsi1	0	NA	1
TMEM110_MUSTN1	0.0713996	0.634315		10	32	0	NA	0	NA	0
PODN	0.0715115	0.634882		9	33	0	NA	0	NA	0
ITGB3BP	0.0717559	0.636622		9	35	0	NA	0	NA	0
MCL1	0.0720557	0.637705		5	29	0	NA	1	rn6	0
ASB15	0.0720817	0.637705		9	34	1	conCri1	0	NA	1
GSE1	0.0720885	0.637705		9	30	0	NA	1	camFer1	0
C15orf40	0.0721444	0.637705		7	29	1	myoDav1	0	NA	1
TMEM18	0.0721541	0.637705		9	32	1	nanGal1	0	NA	1
ASB18	0.0722141	0.637705		8	27	1	conCri1	0	NA	1
LRRC27	0.0722168	0.637705		8	31	2	nanGal1;hetGla2	5	oryCun2;ochPri3;turTru2;orcOrc1;balAcu1	2
ATP13A4	0.0722742	0.637784		8	32	0	NA	0	NA	0
TMEM116	0.0724292	0.638415		10	34	0	NA	0	NA	0
TMEM45A	0.0724522	0.638415		10	34	1	nanGal1	0	NA	1
S100A6	0.072491	0.638415		10	37	2	hetGla2;capHir1	4	panHod1;bosTau8;bisBis1;pteVam1	2
GOLGA5	0.0726277	0.639192		10	35	0	NA	0	NA	0
AMZ1	0.0728289	0.640244		8	28	1	eptFus1	0	NA	1
NLN	0.0728445	0.640244		10	34	1	nanGal1	0	NA	1
IL1R1	0.0729062	0.640317		10	36	0	NA	0	NA	0
CRYBB2	0.0729839	0.640317		8	32	1	chrAsi1	0	NA	1
SNX11	0.0729986	0.640317		10	38	0	NA	0	NA	0
RACGAP1	0.0735117	0.644389		9	32	1	nanGal1	0	NA	1
PTK7	0.0737671	0.645507		9	38	0	NA	0	NA	0
OSBP2	0.0738156	0.645507		10	30	0	NA	0	NA	0
RPS19	0.0738205	0.645507		10	35	0	NA	0	NA	0
FOXM1	0.0738801	0.645507		10	36	0	NA	1	bisBis1	0
F12	0.0738842	0.645507		7	32	2	eptFus1;myoLuc2	2	orcOrc1;balAcu1	1
ZFR2	0.0740328	0.646377		6	26	4	capHir1;eptFus1;myoDav1;myoLuc2	4	calJac3;saiBol1;mm10;ochPri3	2
EPCAM	0.0741843	0.647168		9	32	1	nanGal1	0	NA	1
PRKAA2	0.0743178	0.647168		10	36	0	NA	0	NA	0
CD96	0.0743396	0.647168		7	33	1	hetGla2	3	calJac3;turTru2;orcOrc1	1
ACRV1	0.0743482	0.647168		9	35	0	NA	0	NA	0
N4BP3	0.074369	0.647168		9	34	0	NA	0	NA	0
PIEZO1	0.0745227	0.648077		7	27	3	capHir1;myoLuc2;chrAsi1	1	pteAle1	3
MYEF2	0.0748044	0.650097		10	37	0	NA	0	NA	0
GRAMD1C	0.0748673	0.650215		8	27	0	NA	0	NA	0
ZNF277	0.0750382	0.65127		9	33	0	NA	0	NA	0
ZHX2	0.0752139	0.652055		9	30	0	NA	0	NA	0
IFNB1	0.0752547	0.652055		10	37	0	NA	0	NA	0
BLK	0.0752771	0.652055		8	32	0	NA	0	NA	0
ELP4	0.0753825	0.652353		9	36	0	NA	1	rn6	0
AMD1	0.0754907	0.652353		10	34	0	NA	0	NA	0
PDXK	0.0755532	0.652353		9	31	1	nanGal1	0	NA	1
IZUMO1R	0.0755587	0.652353		8	31	0	NA	0	NA	0
HIP1R	0.075559	0.652353		9	31	1	capHir1	1	oryCun2	1
SPZ1	0.0757411	0.653005		9	34	2	nanGal1;hetGla2	4	chlSab2;calJac3;oryCun2;cerSim1	2
CKAP5	0.07576	0.653005		10	32	0	NA	0	NA	0
PRAME	0.0758614	0.653005		8	31	1	triMan1	2	bosTau8;bisBis1	1
KIAA1462	0.0758773	0.653005		8	33	1	triMan1	1	bosTau8	1
TLR10	0.0758824	0.653005		5	36	3	micOch1;nanGal1;hetGla2	3	otoGar3;mm10;musFur1	3
ZNF136	0.0761617	0.654981		8	28	5	micOch1;capHir1;eptFus1;triMan1;chrAsi1	6	perManBai1;mm10;turTru2;bosTau8;odoRosDiv1;pteVam1	4
C2CD2	0.0762739	0.655518		8	32	1	nanGal1	0	NA	1
SASS6	0.0764808	0.656868		10	33	0	NA	0	NA	0
SAP18	0.0765887	0.657012		8	32	0	NA	0	NA	0
MAML1	0.0766184	0.657012		9	29	0	NA	0	NA	0
CLEC2B	0.0766472	0.657012		8	29	3	hetGla2;conCri1;chrAsi1	1	octDeg1	3
LRRC9	0.0767061	0.657089		10	33	0	NA	0	NA	0
MON2	0.0768461	0.657861		9	32	0	NA	0	NA	0
RGL3	0.0769464	0.658291		8	29	1	hetGla2	0	NA	1
CYP19A1	0.0771082	0.659084		9	36	0	NA	0	NA	0
NMUR1	0.0771391	0.659084		10	35	1	hetGla2	0	NA	1
TRPM1	0.0772451	0.659562		7	31	1	myoDav1	0	NA	1
ZNF559_ZNF177	0.0773583	0.660101		5	31	1	capHir1	3	rhiRox1;oryCun2;panHod1	1
DYX1C1	0.0775711	0.661488		7	31	1	nanGal1	0	NA	1
EP300	0.0777665	0.662726		8	30	0	NA	0	NA	0
CYB5R2	0.0781937	0.665935		10	38	1	hetGla2	0	NA	1
KIAA1875	0.0783513	0.666838		5	33	2	hetGla2;myoLuc2	10	ponAbe2;rheMac3;macFas5;rhiRox1;tarSyr2;speTri2;balAcu1;panHod1;pteAle1;pteVam1	2
FAM71E2	0.0784009	0.666838		5	27	2	nanGal1;hetGla2	7	ponAbe2;rheMac3;macFas5;papAnu2;octDeg1;orcOrc1;equCab2	2
KRT1	0.078551	0.667302		8	31	0	NA	0	NA	0
DCTN1	0.0785567	0.667302		10	32	0	NA	0	NA	0
PLEKHB2	0.0786506	0.667572		6	29	0	NA	0	NA	0
KIAA1143	0.0786899	0.667572		9	33	0	NA	0	NA	0
SPATA32	0.078887	0.668813		10	35	2	nanGal1;hetGla2	1	oryCun2	2
RDH16	0.0791077	0.670253		8	30	3	nanGal1;conCri1;triMan1	3	orcOrc1;pteAle1;pteVam1	3
CD244	0.0792295	0.670854		9	36	1	nanGal1	0	NA	1
TMEM234	0.0793928	0.671805		9	37	0	NA	0	NA	0
CISD3	0.0794741	0.672061		9	37	0	NA	0	NA	0
CCDC154	0.0796374	0.672445		7	34	1	nanGal1	3	chlSab2;turTru2;orcOrc1	1
SPATA2L	0.0796458	0.672445		7	31	0	NA	0	NA	0
EXOSC8	0.0796726	0.672445		10	36	0	NA	0	NA	0
DCLRE1C	0.0799528	0.674378		8	34	1	triMan1	0	NA	1
DHTKD1	0.0800743	0.674458		7	31	1	nanGal1	0	NA	1
MCPH1	0.0801134	0.674458		7	31	2	eptFus1;myoDav1	0	NA	1
ADORA2B	0.0801159	0.674458		7	29	0	NA	0	NA	0
C5orf45	0.0803149	0.675632		9	36	1	myoDav1	2	papAnu2;ochPri3	1
ZNF177	0.0803579	0.675632		5	31	1	capHir1	3	rhiRox1;oryCun2;panHod1	1
DPYD	0.0807368	0.678385		6	30	0	NA	0	NA	0
PHF11	0.0809907	0.680085		10	32	1	nanGal1	2	tarSyr2;lepWed1	1
AL049794,1	0.0812236	0.681521		8	35	8	micOch1;nanGal1;hetGla2;capHir1;eptFus1;myoDav1;myoLuc2;conCri1	23	calJac3;speTri2;perManBai1;mm10;rn6;cavPor3;octDeg1;oryCun2;turTru2;orcOrc1;balAcu1;panHod1;bosTau8;bisBis1;equCab2;cerSim1;felCat8;canFam3;musFur1;odoRosDiv1;lepWed1;pteAle1;pteVam1	6
KRT77	0.0812891	0.681521		9	35	1	triMan1	0	NA	1
KNSTRN	0.081317	0.681521		9	33	0	NA	0	NA	0
KCNAB2	0.0814078	0.681849		7	29	0	NA	0	NA	0
AC007906,1	0.081564	0.682723		10	38	0	NA	0	NA	0
PTCD3	0.0816583	0.683078		10	36	0	NA	0	NA	0
GPR111	0.0817768	0.683636		10	35	1	triMan1	0	NA	1
FAM63A	0.081985	0.684638		9	36	0	NA	0	NA	0
BLVRA	0.082046	0.684638		6	27	0	NA	0	NA	0
DZIP1L	0.0820526	0.684638		8	34	4	nanGal1;eptFus1;myoDav1;myoLuc2	1	tarSyr2	2
ISOC2	0.0823668	0.686825		8	33	1	nanGal1	0	NA	1
ABI1	0.0827644	0.689703		10	36	0	NA	0	NA	0
MEP1A	0.0829873	0.691124		9	34	0	NA	0	NA	0
TNK1	0.0830802	0.69146		9	35	0	NA	2	panPan1;turTru2	0
CH25H	0.0837511	0.696604		10	35	1	nanGal1	0	NA	1
MT_ND6	0.084617	0.703362		6	33	3	hetGla2;capHir1;myoLuc2	13	rhiRox1;calJac3;tarSyr2;speTri2;mm10;rn6;cavPor3;octDeg1;oryCun2;camFer1;canFam3;pteAle1;loxAfr3	3
CERK	0.0849627	0.705599		6	26	1	myoDav1	0	NA	1
TTLL9	0.0849932	0.705599		10	35	1	nanGal1	0	NA	1
ARMC5	0.0851374	0.705957		8	28	0	NA	0	NA	0
CMIP	0.0851546	0.705957		9	27	0	NA	0	NA	0
TUBB	0.085197	0.705957		9	34	1	nanGal1	0	NA	1
FBN3	0.0853538	0.706811		9	29	7	micOch1;nanGal1;hetGla2;eptFus1;myoDav1;myoLuc2;conCri1	5	perManBai1;mm10;rn6;cavPor3;ochPri3	5
HSD17B11	0.085691	0.709158		8	31	0	NA	0	NA	0
C1orf56	0.0857454	0.709163		8	34	1	hetGla2	1	equCab2	1
NPFFR2	0.0858592	0.7094		10	34	1	hetGla2	1	canFam3	1
C3AR1	0.0858818	0.7094		10	38	1	conCri1	0	NA	1
SFSWAP	0.0863354	0.7127		9	32	0	NA	2	oryCun2;ochPri3	0
RETN	0.086406	0.712836		8	34	1	myoDav1	0	NA	1
C16orf90	0.0866754	0.714611		9	37	1	hetGla2	3	orcOrc1;balAcu1;panHod1	1
LRRC63	0.0867699	0.714943		8	33	1	hetGla2	1	equCab2	1
VAV3	0.086838	0.714963		10	29	0	NA	0	NA	0
ANK1	0.0868809	0.714963		8	32	1	capHir1	0	NA	1
MNDA	0.0869651	0.714963		5	29	5	micOch1;nanGal1;capHir1;conCri1;triMan1	9	calJac3;otoGar3;perManBai1;balAcu1;panHod1;cerSim1;odoRosDiv1;lepWed1;loxAfr3	5
ATP9B	0.0870328	0.714963		9	28	1	myoDav1	0	NA	1
VEGFA	0.0870437	0.714963		8	22	0	NA	0	NA	0
SPAG11A	0.0871454	0.715352		8	34	2	micOch1;hetGla2	2	tarSyr2;perManBai1	2
FGD2	0.0874051	0.716822		8	30	1	hetGla2	0	NA	1
SIGLECL1	0.0874643	0.716822		9	34	2	hetGla2;conCri1	3	tarSyr2;cavPor3;octDeg1	2
SLC35E4	0.0874876	0.716822		8	33	0	NA	0	NA	0
F2	0.0876215	0.717473		9	31	0	NA	0	NA	0
PRR15	0.0877299	0.717914		9	32	1	chrAsi1	0	NA	1
GLRA4	0.0879684	0.71921		10	36	1	triMan1	0	NA	1
GDPD2	0.0879974	0.71921		10	37	0	NA	0	NA	0
NDST3	0.088095	0.719561		8	29	1	eptFus1	0	NA	1
DLG1	0.088364	0.721311		9	30	0	NA	0	NA	0
AQP3	0.0884785	0.721687		10	37	0	NA	0	NA	0
TMEM173	0.0885197	0.721687		10	37	0	NA	0	NA	0
EID1	0.0887307	0.722961		9	35	0	NA	0	NA	0
STOML1	0.088988	0.724609		10	38	2	myoDav1;myoLuc2	0	NA	1
ZNF248	0.0892318	0.725758		9	29	0	NA	0	NA	0
SLC6A3	0.0892775	0.725758		10	24	0	NA	0	NA	0
COL7A1	0.0892944	0.725758		8	34	0	NA	1	turTru2	0
C6orf201	0.0894551	0.726616		6	32	1	hetGla2	1	rn6	1
HMHB1	0.0895318	0.726791		10	35	9	micOch1;nanGal1;hetGla2;capHir1;eptFus1;myoDav1;myoLuc2;conCri1;triMan1	15	papAnu2;perManBai1;rn6;cavPor3;octDeg1;ochPri3;orcOrc1;balAcu1;equCab2;canFam3;musFur1;odoRosDiv1;lepWed1;pteAle1;loxAfr3	7
CALML6	0.089657	0.727359		7	33	5	micOch1;nanGal1;capHir1;conCri1;triMan1	9	perManBai1;mm10;rn6;cavPor3;octDeg1;vicPac2;camFer1;panHod1;equCab2	5
FLNB	0.0897926	0.728011		9	33	0	NA	0	NA	0
IGSF3	0.0901941	0.730816		9	33	1	myoDav1	0	NA	1
CEACAM20	0.0903101	0.731268		8	30	4	eptFus1;myoDav1;conCri1;triMan1	3	octDeg1;musFur1;pteAle1	3
MED13L	0.0903608	0.731268		10	33	0	NA	0	NA	0
RNF183	0.090695	0.733263		9	37	2	myoDav1;myoLuc2	0	NA	1
CCR9	0.0907187	0.733263		9	37	0	NA	0	NA	0
PPP1R32	0.0909647	0.734599		7	34	1	hetGla2	1	cavPor3	1
PTAFR	0.0909955	0.734599		10	36	0	NA	0	NA	0
DDX53	0.0915609	0.736967		8	27	3	micOch1;nanGal1;hetGla2	5	perManBai1;mm10;rn6;orcOrc1;felCat8	3
FAM134A	0.0915724	0.736967		8	34	0	NA	0	NA	0
RAD51L3_RFFL	0.091575	0.736967		9	31	0	NA	0	NA	0
PHC1	0.0915909	0.736967		9	35	0	NA	1	pteAle1	0
CPLX3	0.0916079	0.736967		9	36	1	chrAsi1	0	NA	1
PRKAR2A	0.0916303	0.736967		5	22	1	hetGla2	0	NA	1
ADAM32	0.0916963	0.736967		8	25	1	hetGla2	0	NA	1
GP2	0.0917363	0.736967		9	33	0	NA	0	NA	0
ZNF660	0.0921291	0.739352		8	38	1	nanGal1	1	perManBai1	1
EPPIN	0.0921454	0.739352		10	36	2	nanGal1;conCri1	1	canFam3	2
ATP8B2	0.0922334	0.739607		9	33	0	NA	0	NA	0
GRAP	0.0923738	0.740283		9	31	1	chrAsi1	0	NA	1
KRTAP2_3	0.0926914	0.742258		9	30	2	eptFus1;triMan1	2	pteAle1;pteVam1	2
TTLL2	0.0927329	0.742258		6	28	4	micOch1;nanGal1;hetGla2;triMan1	7	speTri2;cavPor3;octDeg1;equCab2;cerSim1;felCat8;musFur1	4
KLHDC7A	0.0928258	0.74255		7	31	0	NA	0	NA	0
COPRS	0.0929419	0.743028		8	34	1	nanGal1	1	perManBai1	1
SPATA45	0.0930843	0.743715		10	36	1	hetGla2	1	orcOrc1	1
COMMD3	0.0934351	0.745325		10	34	1	conCri1	0	NA	1
AREG	0.0934673	0.745325		9	36	0	NA	0	NA	0
AOC1	0.093483	0.745325		8	30	0	NA	0	NA	0
MANSC1	0.0935121	0.745325		9	37	0	NA	0	NA	0
PCED1B	0.0936735	0.745607		10	33	0	NA	0	NA	0
EPSTI1	0.0937349	0.745607		9	33	1	nanGal1	0	NA	1
ASCL4	0.0937413	0.745607		8	30	1	hetGla2	0	NA	1
CRNKL1	0.0937892	0.745607		10	36	0	NA	0	NA	0
TOMM20L	0.0938304	0.745607		8	27	2	nanGal1;hetGla2	4	calJac3;octDeg1;turTru2;orcOrc1	2
ATP5L	0.0939405	0.745972		9	37	0	NA	0	NA	0
EDEM2	0.0939896	0.745972		9	37	0	NA	1	turTru2	0
TTC6	0.0941416	0.746728		8	29	1	hetGla2	0	NA	1
ICAM3	0.0945532	0.749103		8	35	2	nanGal1;conCri1	3	perManBai1;mm10;rn6	2
UGT2B7	0.0945548	0.749103		7	26	1	capHir1	4	rheMac3;tarSyr2;orcOrc1;cerSim1	1
TTC24	0.0947	0.749803		10	36	2	micOch1;nanGal1	1	camFer1	2
BLOC1S4	0.0948427	0.750482		6	26	1	capHir1	0	NA	1
CYP2C18	0.0949396	0.750798		6	29	2	capHir1;myoLuc2	9	ponAbe2;rheMac3;macFas5;mm10;vicPac2;turTru2;orcOrc1;balAcu1;loxAfr3	2
BRIP1	0.0951125	0.751504		10	30	0	NA	0	NA	0
TMEM56_RWDD3	0.0951429	0.751504		7	36	0	NA	0	NA	0
BFSP1	0.0952376	0.751801		8	32	2	nanGal1;conCri1	0	NA	2
PCDHB2	0.0953226	0.752021		6	21	0	NA	1	orcOrc1	0
SPTLC1	0.0954403	0.752465		9	29	0	NA	0	NA	0
AGXT	0.0955201	0.752465		9	30	1	capHir1	0	NA	1
PGBD2	0.095568	0.752465		7	28	2	eptFus1;myoDav1	2	perManBai1;mm10	1
NEK4	0.0956074	0.752465		10	35	0	NA	1	balAcu1	0
TBX6	0.0957352	0.753022		10	38	0	NA	0	NA	0
TEX43	0.0958751	0.753337		9	34	1	nanGal1	0	NA	1
IL10	0.0958897	0.753337		10	38	0	NA	0	NA	0
TRIM73	0.0959542	0.753395		10	34	0	NA	0	NA	0
NOX5	0.0961745	0.754675		8	32	3	nanGal1;conCri1;triMan1	9	saiBol1;otoGar3;mm10;rn6;vicPac2;turTru2;orcOrc1;balAcu1;odoRosDiv1	3
TRAF3IP1	0.0962416	0.754752		5	29	0	NA	0	NA	0
C22orf46	0.0963811	0.755396		10	38	0	NA	1	calJac3	0
RAI1	0.0965557	0.755907		7	27	0	NA	0	NA	0
TMEM120B	0.0966315	0.755907		8	29	1	conCri1	0	NA	1
RHOBTB2	0.0967078	0.755907		9	33	0	NA	0	NA	0
USP33	0.0967186	0.755907		9	35	0	NA	0	NA	0
RAB1B	0.0968244	0.755907		9	36	0	NA	0	NA	0
PDE6B	0.0969027	0.755907		7	24	0	NA	0	NA	0
SLA2	0.0969126	0.755907		10	34	0	NA	0	NA	0
GPRIN3	0.0969182	0.755907		9	34	2	hetGla2;myoLuc2	0	NA	2
CD164	0.0969691	0.755907		10	35	0	NA	0	NA	0
CLNS1A	0.09702	0.755907		9	36	0	NA	0	NA	0
MGARP	0.0975767	0.759795		9	35	2	eptFus1;conCri1	0	NA	2
TRIM68	0.0976779	0.760134		8	34	2	micOch1;chrAsi1	1	cavPor3	2
NFKBID	0.0977918	0.760251		10	36	0	NA	0	NA	0
GLTPD2	0.0978084	0.760251		9	32	0	NA	6	rheMac3;macFas5;papAnu2;chlSab2;speTri2;camFer1	0
RP11_176H8,1	0.0980003	0.761294		10	37	1	nanGal1	0	NA	1
ZC3H12B	0.0980709	0.761393		8	34	0	NA	0	NA	0
NCR1	0.0982222	0.762119		7	26	0	NA	0	NA	0
AC044839,1	0.0983326	0.762527		8	37	5	nanGal1;eptFus1;myoDav1;myoLuc2;conCri1	26	rheMac3;macFas5;papAnu2;chlSab2;rhiRox1;calJac3;saiBol1;speTri2;perManBai1;mm10;rn6;cavPor3;octDeg1;ochPri3;vicPac2;camFer1;turTru2;orcOrc1;balAcu1;bisBis1;equCab2;felCat8;musFur1;odoRosDiv1;lepWed1;pteVam1	3
SH3TC1	0.0986794	0.762967		8	20	0	NA	0	NA	0
TMEM86B	0.0986953	0.762967		8	35	1	eptFus1	0	NA	1
MTL5	0.098699	0.762967		7	28	0	NA	0	NA	0
ARL11	0.0987167	0.762967		8	35	0	NA	0	NA	0
CDK4	0.0987944	0.762967		10	37	0	NA	0	NA	0
SPRR2B	0.098826	0.762967		8	25	0	NA	1	pteVam1	0
SPPL2C	0.0989207	0.762967		8	27	0	NA	0	NA	0
TCEAL1	0.0989768	0.762967		10	35	1	hetGla2	0	NA	1
PROCA1	0.0990674	0.762967		10	34	1	hetGla2	0	NA	1
IQUB	0.0990712	0.762967		8	31	0	NA	0	NA	0
LCA5	0.0991589	0.762967		10	33	0	NA	0	NA	0
BRIX1	0.0992185	0.762967		9	33	0	NA	0	NA	0
GP5	0.0992233	0.762967		8	25	1	hetGla2	3	cavPor3;octDeg1;ochPri3	1
ZNF366	0.0992444	0.762967		8	35	0	NA	0	NA	0
AP1G2	0.0992581	0.762967		10	37	1	triMan1	0	NA	1
KCNU1	0.0996073	0.765204		8	25	0	NA	0	NA	0
RAD51D	0.0998734	0.766802		9	34	0	NA	0	NA	0
FAM71A	0.100062	0.767802		7	36	1	chrAsi1	1	orcOrc1	1
SOX13	0.100292	0.769117		10	36	0	NA	0	NA	0
WDSUB1	0.100527	0.77035		10	33	0	NA	0	NA	0
FCHO1	0.100569	0.77035		9	31	1	eptFus1	0	NA	1
FAM71B	0.100648	0.770503		8	36	1	triMan1	1	loxAfr3	1
LZTS3	0.100762	0.770929		9	31	0	NA	0	NA	0
BTF3	0.100877	0.771361		8	33	0	NA	0	NA	0
TIMP1	0.101066	0.772164		9	34	0	NA	0	NA	0
FAM170B	0.101099	0.772164		8	34	2	myoDav1;myoLuc2	1	saiBol1	1
TNFAIP8L3	0.101239	0.77239		8	29	0	NA	0	NA	0
HEATR5A	0.101257	0.77239		9	25	1	nanGal1	0	NA	1
CST9	0.101305	0.77239		5	28	0	NA	2	perManBai1;balAcu1	0
RP11_315D16,2	0.101669	0.774721		7	31	1	hetGla2	2	cavPor3;octDeg1	1
GPR158	0.101866	0.775614		9	29	0	NA	0	NA	0
AGTRAP	0.101904	0.775614		9	37	0	NA	0	NA	0
PASD1	0.102259	0.777642		9	33	6	micOch1;nanGal1;hetGla2;eptFus1;conCri1;chrAsi1	13	speTri2;perManBai1;mm10;cavPor3;octDeg1;oryCun2;ochPri3;turTru2;orcOrc1;bosTau8;cerSim1;felCat8;musFur1	6
MT_ND4L	0.102289	0.777642		7	36	1	myoLuc2	1	otoGar3	1
RFPL4B	0.102384	0.777642		8	28	5	micOch1;hetGla2;capHir1;conCri1;chrAsi1	6	otoGar3;octDeg1;panHod1;bosTau8;bisBis1;loxAfr3	5
HACE1	0.102407	0.777642		9	33	0	NA	0	NA	0
GRAMD4	0.102502	0.777913		6	25	1	myoDav1	0	NA	1
LAYN	0.102905	0.780204		8	37	1	chrAsi1	0	NA	1
ARL14	0.102922	0.780204		10	37	1	conCri1	0	NA	1
CLEC14A	0.103067	0.780856		9	31	0	NA	0	NA	0
B3GNT6	0.103254	0.78182		7	28	3	eptFus1;myoDav1;conCri1	4	turTru2;orcOrc1;pteAle1;pteVam1	2
GJA9_MYCBP	0.103451	0.78217		9	38	7	nanGal1;hetGla2;eptFus1;myoDav1;myoLuc2;conCri1;chrAsi1	8	papAnu2;perManBai1;mm10;rn6;cavPor3;octDeg1;ochPri3;lepWed1	5
SERPINB9	0.103483	0.78217		5	34	2	eptFus1;myoDav1	3	octDeg1;turTru2;orcOrc1	1
LRRC70	0.103524	0.78217		10	36	7	micOch1;nanGal1;hetGla2;eptFus1;myoDav1;myoLuc2;conCri1	10	otoGar3;perManBai1;mm10;rn6;cavPor3;octDeg1;oryCun2;ochPri3;pteAle1;pteVam1	5
TSC1	0.103574	0.78217		8	33	0	NA	0	NA	0
CCDC22	0.103597	0.78217		10	30	0	NA	0	NA	0
METTL7B	0.103859	0.783699		8	36	2	myoDav1;conCri1	1	odoRosDiv1	2
TEX37	0.104062	0.784781		10	33	1	hetGla2	1	balAcu1	1
BAI3	0.104133	0.784868		9	29	1	nanGal1	0	NA	1
KCNB1	0.104202	0.784939		10	32	0	NA	0	NA	0
SCGB1D1	0.104388	0.785896		7	30	0	NA	1	canFam3	0
RPRD1A	0.104456	0.785957		9	38	0	NA	0	NA	0
ZNF79	0.104584	0.786467		7	34	4	nanGal1;hetGla2;myoDav1;myoLuc2	6	speTri2;mm10;rn6;cavPor3;oryCun2;ochPri3	3
MRGPRX2	0.104768	0.787248		9	35	3	hetGla2;conCri1;triMan1	4	speTri2;cavPor3;orcOrc1;balAcu1	3
GBP5	0.104807	0.787248		8	27	1	triMan1	3	cavPor3;odoRosDiv1;lepWed1	1
MOK	0.105135	0.789261		7	34	1	hetGla2	0	NA	1
GLIPR1L2	0.105222	0.789461		10	33	0	NA	0	NA	0
EGFR	0.105339	0.789891		7	30	0	NA	0	NA	0
ATP5SL	0.105535	0.790567		9	34	0	NA	0	NA	0
CCDC38	0.105549	0.790567		10	34	1	conCri1	0	NA	1
OBSL1	0.106045	0.793828		8	32	0	NA	0	NA	0
CXorf66	0.106349	0.795656		10	31	2	micOch1;triMan1	4	speTri2;turTru2;orcOrc1;balAcu1	2
ZNF891	0.106788	0.798488		9	33	5	nanGal1;hetGla2;eptFus1;myoDav1;conCri1	8	tarSyr2;speTri2;oryCun2;felCat8;canFam3;musFur1;odoRosDiv1;lepWed1	4
SH2D1B	0.107038	0.799901		8	35	2	eptFus1;myoDav1	0	NA	1
MMEL1	0.107253	0.801051		5	30	0	NA	0	NA	0
SYNJ2BP_COX16	0.10759	0.80311		8	33	1	chrAsi1	0	NA	1
TAS2R39	0.10765	0.80311		10	36	3	nanGal1;conCri1;triMan1	8	otoGar3;oryCun2;turTru2;orcOrc1;balAcu1;felCat8;musFur1;odoRosDiv1	3
PAPLN	0.107785	0.803329		8	31	1	capHir1	1	vicPac2	1
ZNF3	0.107802	0.803329		9	35	1	myoDav1	1	camFer1	1
ISY1	0.107986	0.804247		8	32	0	NA	0	NA	0
PTRH1	0.108683	0.808983		9	33	0	NA	2	camFer1;musFur1	0
DTD2	0.109016	0.810781		10	35	1	nanGal1	0	NA	1
GABRQ	0.109048	0.810781		10	32	0	NA	0	NA	0
LY86	0.10912	0.81086		10	31	0	NA	0	NA	0
SYCP2	0.109252	0.811387		9	29	3	micOch1;nanGal1;chrAsi1	1	panPan1	3
CPA5	0.109538	0.813049		10	36	1	hetGla2	0	NA	1
LRP1B	0.110066	0.816508		6	20	0	NA	0	NA	0
TULP1	0.110242	0.817354		7	33	1	triMan1	0	NA	1
PEX11G	0.110513	0.818899		10	35	0	NA	0	NA	0
SCNN1A	0.110884	0.821188		8	27	0	NA	0	NA	0
FABP12	0.111097	0.822305		7	34	1	micOch1	2	turTru2;orcOrc1	1
GSAP	0.111336	0.822659		9	27	0	NA	0	NA	0
GPX5	0.111364	0.822659		8	34	1	hetGla2	0	NA	1
SCN5A	0.111382	0.822659		10	28	0	NA	0	NA	0
GABPB2	0.111395	0.822659		10	30	1	conCri1	0	NA	1
NUDT8	0.111763	0.824555		6	28	0	NA	0	NA	0
MRPL4	0.111776	0.824555		9	32	0	NA	0	NA	0
ZNF304	0.112079	0.826327		9	36	2	nanGal1;hetGla2	5	speTri2;mm10;rn6;cavPor3;balAcu1	2
MROH9	0.112372	0.827811		9	28	0	NA	0	NA	0
WBSCR28	0.112406	0.827811		9	34	0	NA	0	NA	0
CAPN8	0.112738	0.829791		7	28	0	NA	7	cavPor3;turTru2;orcOrc1;felCat8;musFur1;odoRosDiv1;pteAle1	0
BPIFC	0.112853	0.829827		10	35	0	NA	0	NA	0
HYAL4	0.112869	0.829827		8	37	0	NA	0	NA	0
FAM150B	0.113004	0.830359		7	25	0	NA	0	NA	0
BTC	0.113235	0.831586		8	34	0	NA	0	NA	0
HS3ST3B1	0.113407	0.832388		9	26	1	myoDav1	0	NA	1
PYCR1	0.11348	0.832462		9	35	0	NA	0	NA	0
ZNF335	0.113713	0.833403		9	34	1	capHir1	0	NA	1
FCRLA	0.113735	0.833403		9	38	0	NA	0	NA	0
SLC4A9	0.114336	0.836898		9	33	1	triMan1	3	turTru2;orcOrc1;balAcu1	1
LACRT	0.114339	0.836898		6	32	1	triMan1	2	perManBai1;mm10	1
ACTR10	0.114742	0.839382		9	33	1	conCri1	0	NA	1
RP11_463C8,4	0.115111	0.841613		10	32	0	NA	0	NA	0
TMEM80	0.115222	0.841959		5	25	0	NA	0	NA	0
TOR4A	0.115452	0.842757		5	24	0	NA	0	NA	0
ARHGAP9	0.115459	0.842757		8	35	0	NA	0	NA	0
SFXN4	0.115544	0.842908		8	29	2	micOch1;hetGla2	1	cavPor3	2
RSPH3	0.115848	0.844456		6	34	0	NA	0	NA	0
KHDC1	0.115884	0.844456		7	32	3	nanGal1;hetGla2;chrAsi1	10	cavPor3;octDeg1;turTru2;orcOrc1;bosTau8;bisBis1;cerSim1;felCat8;canFam3;musFur1	3
ADRBK2	0.116065	0.845307		8	30	0	NA	0	NA	0
C3orf67	0.116192	0.845766		9	35	0	NA	0	NA	0
SLAMF9	0.116303	0.8461		9	35	2	nanGal1;hetGla2	6	panPan1;tarSyr2;turTru2;orcOrc1;balAcu1;felCat8	2
ZNF394	0.116657	0.847736		9	34	0	NA	0	NA	0
KLK8	0.11671	0.847736		9	38	1	triMan1	3	turTru2;orcOrc1;balAcu1	1
FIGLA	0.116728	0.847736		10	31	0	NA	0	NA	0
ZFP30	0.116785	0.847736		8	34	2	myoLuc2;chrAsi1	2	calJac3;saiBol1	2
DEFB104A	0.116955	0.848318		9	28	1	micOch1	2	tarSyr2;perManBai1	1
SEMA3E	0.116994	0.848318		10	29	0	NA	0	NA	0
GPSM1	0.117063	0.848349		7	32	0	NA	0	NA	0
LNPEP	0.117184	0.848524		10	34	0	NA	0	NA	0
OCSTAMP	0.117216	0.848524		9	37	0	NA	0	NA	0
TRIM62	0.11728	0.848524		10	26	0	NA	0	NA	0
CBR3	0.117379	0.848777		9	31	0	NA	0	NA	0
ZNF862	0.117444	0.848781		8	35	2	nanGal1;chrAsi1	3	mm10;octDeg1;musFur1	2
COG3	0.117957	0.851681		9	31	0	NA	0	NA	0
RNMT	0.117978	0.851681		10	35	0	NA	0	NA	0
PDE7A	0.118838	0.851681		9	33	0	NA	0	NA	0
KIAA1217	0.11906	0.851681		8	31	0	NA	0	NA	0
ADAMTS15	0.119074	0.851681		9	33	0	NA	0	NA	0
UGT3A1	0.119081	0.851681		5	29	3	nanGal1;hetGla2;triMan1	3	cavPor3;cerSim1;lepWed1	3
TPD52L3	0.119474	0.851681		10	34	4	nanGal1;hetGla2;conCri1;chrAsi1	4	calJac3;saiBol1;cavPor3;octDeg1	4
AGR3	0.119549	0.851681		8	35	2	nanGal1;hetGla2	4	vicPac2;felCat8;odoRosDiv1;lepWed1	2
TACR3	0.119691	0.851681		7	31	1	nanGal1	0	NA	1
CCNL1	0.119755	0.851681		10	34	0	NA	0	NA	0
TBX22	0.119771	0.851681		8	28	1	chrAsi1	0	NA	1
FAM170A	0.119775	0.851681		9	38	0	NA	0	NA	0
RSPH4A	0.119833	0.851681		9	36	0	NA	0	NA	0
ERG	0.120074	0.851681		9	36	0	NA	0	NA	0
U2AF1L4	0.120079	0.851681		10	37	5	hetGla2;eptFus1;myoDav1;myoLuc2;conCri1	5	tarSyr2;otoGar3;cavPor3;octDeg1;ochPri3	3
RAD23B	0.120503	0.851681		9	33	0	NA	0	NA	0
TIRAP	0.120621	0.851681		8	35	0	NA	0	NA	0
TGM4	0.120622	0.851681		7	36	6	hetGla2;capHir1;myoLuc2;conCri1;triMan1;chrAsi1	20	calJac3;otoGar3;speTri2;oryCun2;ochPri3;vicPac2;camFer1;turTru2;balAcu1;panHod1;bosTau8;bisBis1;cerSim1;felCat8;canFam3;musFur1;odoRosDiv1;lepWed1;pteAle1;loxAfr3	5
SCP2	0.120764	0.851681		10	32	0	NA	0	NA	0
ARGLU1	0.120841	0.851681		10	37	0	NA	0	NA	0
COL4A2	0.120865	0.851681		7	26	1	capHir1	5	panPan1;calJac3;rn6;vicPac2;panHod1	1
CYP2J2	0.120906	0.851681		9	31	1	nanGal1	0	NA	1
SLC7A13	0.120919	0.851681		9	34	5	capHir1;eptFus1;conCri1;triMan1;chrAsi1	15	calJac3;saiBol1;vicPac2;camFer1;orcOrc1;balAcu1;panHod1;bosTau8;bisBis1;equCab2;felCat8;canFam3;musFur1;odoRosDiv1;lepWed1	4
C18orf63	0.120995	0.851681		9	34	0	NA	0	NA	0
GRINA	0.121156	0.851681		8	32	0	NA	0	NA	0
IQCF6	0.121939	0.851681		9	37	0	NA	0	NA	0
ZNF155	0.122274	0.851681		6	21	5	micOch1;nanGal1;hetGla2;eptFus1;triMan1	3	perManBai1;oryCun2;panHod1	5
CYP20A1	0.122436	0.851681		10	29	1	micOch1	0	NA	1
AARD	0.122491	0.851681		8	25	2	hetGla2;chrAsi1	2	tarSyr2;otoGar3	2
PSKH2	0.122756	0.851681		7	36	3	nanGal1;capHir1;eptFus1	13	perManBai1;mm10;rn6;octDeg1;vicPac2;camFer1;orcOrc1;balAcu1;panHod1;bosTau8;bisBis1;pteAle1;pteVam1	3
MINOS1_NBL1	0.123226	0.851681		9	34	0	NA	0	NA	0
NBL1	0.123336	0.851681		9	34	0	NA	0	NA	0
BEGAIN	0.123552	0.851681		7	22	1	eptFus1	0	NA	1
C4orf19	0.123556	0.851681		10	36	0	NA	0	NA	0
PPP1CB	0.123571	0.851681		10	36	0	NA	0	NA	0
DHX9	0.123622	0.851681		10	37	1	nanGal1	0	NA	1
ZC3H8	0.123731	0.851681		9	37	1	chrAsi1	0	NA	1
SLC10A5	0.123975	0.851681		10	37	2	hetGla2;triMan1	4	canFam3;musFur1;odoRosDiv1;lepWed1	2
DIO2	0.124161	0.851681		7	35	0	NA	0	NA	0
OTOA	0.124177	0.851681		6	33	0	NA	0	NA	0
IGSF23	0.124234	0.851681		8	34	3	nanGal1;hetGla2;capHir1	10	rheMac3;chlSab2;rhiRox1;cavPor3;oryCun2;turTru2;orcOrc1;equCab2;cerSim1;loxAfr3	3
MLNR	0.124343	0.851681		6	26	3	micOch1;nanGal1;hetGla2	3	perManBai1;mm10;orcOrc1	3
TRIOBP	0.124389	0.851681		9	37	0	NA	0	NA	0
INMT	0.124574	0.851681		9	34	5	nanGal1;eptFus1;myoDav1;myoLuc2;triMan1	8	rhiRox1;tarSyr2;balAcu1;cerSim1;felCat8;odoRosDiv1;lepWed1;pteAle1	3
FZD6	0.124855	0.851681		10	35	0	NA	0	NA	0
NXF3	0.125067	0.851681		5	26	1	myoDav1	4	panHod1;felCat8;canFam3;odoRosDiv1	1
C12orf4	0.125388	0.851681		10	36	0	NA	0	NA	0
NECAB1	0.125681	0.851681		9	27	0	NA	0	NA	0
RP11_407N17,3	0.125703	0.851681		6	30	2	nanGal1;capHir1	2	rheMac3;pteAle1	2
G6PC2	0.125773	0.851681		10	37	1	micOch1	2	rhiRox1;rn6	1
ZNF576	0.125777	0.851681		10	37	3	micOch1;eptFus1;chrAsi1	2	perManBai1;mm10	3
PDE6C	0.126003	0.851681		10	33	1	chrAsi1	0	NA	1
KIAA1524	0.126065	0.851681		9	36	0	NA	0	NA	0
RFX8	0.126196	0.851681		10	33	1	hetGla2	3	panPan1;turTru2;orcOrc1	1
C19orf57	0.126468	0.851681		10	32	2	conCri1;triMan1	3	panPan1;ochPri3;loxAfr3	2
ZSCAN18	0.12678	0.851681		6	33	3	nanGal1;hetGla2;capHir1	5	turTru2;orcOrc1;balAcu1;equCab2;cerSim1	3
HYPM	0.126895	0.851681		7	31	3	hetGla2;capHir1;myoLuc2	5	octDeg1;turTru2;panHod1;bosTau8;loxAfr3	3
SERPINB12	0.1271	0.851681		9	35	1	triMan1	1	balAcu1	1
HRASLS	0.127506	0.851681		5	25	1	nanGal1	0	NA	1
ZMYM6	0.127802	0.851681		9	32	1	chrAsi1	0	NA	1
OAS1	0.128212	0.851681		10	37	1	micOch1	0	NA	1
NPS	0.128224	0.851681		10	35	0	NA	1	orcOrc1	0
SPEG	0.128266	0.851681		9	29	1	capHir1	1	camFer1	1
ZNF786	0.128312	0.851681		8	29	3	hetGla2;triMan1;chrAsi1	2	octDeg1;equCab2	2
KRTAP10_8	0.128315	0.851681		6	27	5	hetGla2;eptFus1;myoLuc2;triMan1;chrAsi1	6	rn6;turTru2;orcOrc1;cerSim1;pteVam1;loxAfr3	3
MYLPF	0.128443	0.851681		10	34	0	NA	0	NA	0
LRRC23	0.128645	0.851681		10	36	0	NA	0	NA	0
SHQ1	0.129095	0.851681		8	32	0	NA	0	NA	0
CLIP1	0.129512	0.851681		10	36	1	conCri1	0	NA	1
ARHGAP19_SLIT1	0.129782	0.851681		9	32	0	NA	0	NA	0
PEX6	0.129847	0.851681		7	29	0	NA	0	NA	0
PARVA	0.12995	0.851681		5	23	1	nanGal1	0	NA	1
LYPD6B	0.130204	0.851681		10	30	0	NA	0	NA	0
CNTN2	0.130404	0.851681		10	32	0	NA	0	NA	0
SCN2A	0.13055	0.851681		8	30	0	NA	0	NA	0
CYP39A1	0.130605	0.851681		10	35	2	triMan1;chrAsi1	0	NA	1
OTOG	0.13091	0.851681		8	30	0	NA	0	NA	0
TEX14	0.130969	0.851681		9	33	5	nanGal1;hetGla2;eptFus1;myoDav1;myoLuc2	7	chlSab2;perManBai1;mm10;turTru2;orcOrc1;balAcu1;felCat8	3
RGS20	0.130991	0.851681		9	28	1	hetGla2	1	speTri2	1
CNST	0.131076	0.851681		6	32	1	nanGal1	0	NA	1
GPR64	0.13144	0.851681		9	31	0	NA	0	NA	0
NRIP2	0.131443	0.851681		9	35	1	hetGla2	1	octDeg1	1
GSTP1	0.131543	0.851681		8	32	0	NA	0	NA	0
ABCA4	0.132191	0.851681		5	34	1	chrAsi1	1	speTri2	1
NOL6	0.132562	0.851681		10	35	0	NA	0	NA	0
ZNF235	0.132621	0.851681		9	33	0	NA	0	NA	0
RBM12B	0.132657	0.851681		8	36	0	NA	0	NA	0
ARFGAP1	0.132939	0.851681		8	35	0	NA	0	NA	0
PPP1R1A	0.133482	0.851681		9	37	0	NA	0	NA	0
S100PBP	0.1335	0.851681		10	36	0	NA	0	NA	0
LGALS2	0.133943	0.851681		10	36	3	eptFus1;myoDav1;myoLuc2	0	NA	1
HOMEZ	0.134138	0.851681		10	36	0	NA	0	NA	0
TM4SF5	0.134411	0.851681		8	36	1	nanGal1	1	pteAle1	1
FCRL6	0.134792	0.851681		8	32	7	micOch1;nanGal1;hetGla2;eptFus1;myoDav1;myoLuc2;conCri1	11	tarSyr2;otoGar3;perManBai1;rn6;octDeg1;ochPri3;camFer1;turTru2;orcOrc1;musFur1;pteVam1	5
DDX58	0.134965	0.851681		9	33	2	conCri1;chrAsi1	3	turTru2;orcOrc1;balAcu1	2
AIM2	0.135019	0.851681		6	27	3	hetGla2;conCri1;triMan1	9	tarSyr2;cavPor3;oryCun2;ochPri3;felCat8;canFam3;musFur1;odoRosDiv1;lepWed1	3
C2orf43	0.135285	0.851681		10	33	0	NA	0	NA	0
GRP	0.13535	0.851681		8	29	0	NA	0	NA	0
KRR1	0.135529	0.851681		9	38	2	myoDav1;myoLuc2	0	NA	1
DRD3	0.135539	0.851681		9	36	0	NA	0	NA	0
RP11_795F19,5	0.135671	0.851681		7	27	0	NA	0	NA	0
CBX8	0.135789	0.851681		9	33	1	chrAsi1	0	NA	1
CASP4	0.135918	0.851681		6	31	1	chrAsi1	1	perManBai1	1
WDR25	0.136092	0.851681		9	29	0	NA	0	NA	0
MICAL2	0.136198	0.851681		9	36	0	NA	0	NA	0
CCDC30	0.136507	0.851681		5	31	2	myoDav1;myoLuc2	1	odoRosDiv1	1
SIRPB1	0.136725	0.851681		5	25	0	NA	1	cavPor3	0
ITPR3	0.137075	0.851681		7	29	1	myoDav1	0	NA	1
GPR31	0.137122	0.851681		6	33	1	hetGla2	2	otoGar3;oryCun2	1
LAMP3	0.137124	0.851681		10	36	0	NA	0	NA	0
C4orf50	0.137806	0.851681		6	32	0	NA	1	canFam3	0
LTBP3	0.137849	0.851681		8	22	1	myoDav1	1	tarSyr2	1
APBB2	0.137927	0.851681		9	33	0	NA	0	NA	0
RP1_66C13,4	0.138081	0.851681		9	34	9	micOch1;nanGal1;hetGla2;capHir1;eptFus1;myoLuc2;conCri1;triMan1;chrAsi1	28	ponAbe2;rheMac3;macFas5;papAnu2;chlSab2;rhiRox1;saiBol1;otoGar3;perManBai1;rn6;cavPor3;octDeg1;ochPri3;vicPac2;camFer1;orcOrc1;balAcu1;panHod1;bosTau8;bisBis1;equCab2;cerSim1;felCat8;musFur1;odoRosDiv1;pteAle1;pteVam1;loxAfr3	7
ZKSCAN5	0.138655	0.851681		9	33	0	NA	0	NA	0
GSDMB	0.138681	0.851681		8	37	7	nanGal1;hetGla2;eptFus1;myoDav1;myoLuc2;conCri1;triMan1	25	rheMac3;macFas5;papAnu2;chlSab2;rhiRox1;calJac3;saiBol1;otoGar3;speTri2;mm10;rn6;cavPor3;octDeg1;oryCun2;ochPri3;vicPac2;turTru2;orcOrc1;balAcu1;felCat8;canFam3;musFur1;odoRosDiv1;lepWed1;pteVam1	5
ZCCHC18	0.138686	0.851681		8	35	4	hetGla2;capHir1;eptFus1;conCri1	14	panTro4;panPan1;rheMac3;papAnu2;cavPor3;octDeg1;oryCun2;ochPri3;panHod1;bosTau8;equCab2;felCat8;musFur1;pteAle1	4
MGAT4D	0.138876	0.851681		9	31	2	nanGal1;hetGla2	4	calJac3;turTru2;orcOrc1;felCat8	2
LRRC14	0.138905	0.851681		9	37	1	chrAsi1	0	NA	1
LGALS9	0.139203	0.851681		7	31	2	capHir1;conCri1	4	turTru2;equCab2;cerSim1;loxAfr3	2
FXYD4	0.1393	0.851681		10	35	0	NA	0	NA	0
ZNF239	0.139507	0.851681		8	36	0	NA	3	perManBai1;mm10;rn6	0
PCSK4	0.139629	0.851681		9	26	1	hetGla2	1	panPan1	1
C1orf127	0.139722	0.851681		9	34	5	capHir1;eptFus1;conCri1;triMan1;chrAsi1	16	octDeg1;vicPac2;camFer1;orcOrc1;balAcu1;panHod1;bosTau8;bisBis1;equCab2;cerSim1;felCat8;musFur1;odoRosDiv1;lepWed1;pteAle1;loxAfr3	4
NMRK2	0.139727	0.851681		10	33	0	NA	5	felCat8;canFam3;musFur1;odoRosDiv1;lepWed1	0
ATF6B	0.139866	0.851681		10	33	0	NA	0	NA	0
FAM179B	0.139979	0.851681		8	33	2	nanGal1;conCri1	1	equCab2	2
ZNF135	0.140061	0.851681		8	31	5	micOch1;capHir1;eptFus1;myoDav1;chrAsi1	5	tarSyr2;perManBai1;mm10;rn6;ochPri3	4
ZNF581	0.140101	0.851681		7	32	2	micOch1;nanGal1	3	perManBai1;mm10;rn6	2
NUDT6	0.140116	0.851681		8	27	1	nanGal1	0	NA	1
YIPF7	0.140175	0.851681		10	35	0	NA	0	NA	0
SPATA21	0.140403	0.851681		9	27	1	nanGal1	1	orcOrc1	1
LENEP	0.140435	0.851681		9	36	0	NA	0	NA	0
CXorf58	0.140512	0.851681		9	31	1	hetGla2	0	NA	1
KRTAP27_1	0.140735	0.851681		9	34	0	NA	1	rhiRox1	0
GCNT7	0.140774	0.851681		9	36	3	eptFus1;myoDav1;myoLuc2	6	rheMac3;macFas5;papAnu2;chlSab2;tarSyr2;ochPri3	1
TMEM202	0.140781	0.851681		7	32	1	triMan1	0	NA	1
RIT2	0.140811	0.851681		9	32	1	nanGal1	1	balAcu1	1
CCDC137	0.140888	0.851681		8	33	0	NA	0	NA	0
GIMAP8	0.140957	0.851681		6	32	1	hetGla2	2	panHod1;musFur1	1
TRIM60	0.141028	0.851681		5	22	2	micOch1;triMan1	3	rn6;orcOrc1;pteVam1	2
TIMELESS	0.141118	0.851681		9	38	1	nanGal1	2	turTru2;orcOrc1	1
CYP4V2	0.141572	0.851681		8	36	1	triMan1	1	panPan1	1
ICK	0.141586	0.851681		9	36	0	NA	0	NA	0
WDR5B	0.141602	0.851681		9	38	0	NA	0	NA	0
ENTHD1	0.141947	0.851681		9	30	1	nanGal1	0	NA	1
C2orf57	0.142148	0.851681		7	34	3	nanGal1;hetGla2;triMan1	9	oryCun2;vicPac2;camFer1;turTru2;orcOrc1;balAcu1;panHod1;bosTau8;loxAfr3	3
SLC27A3	0.142489	0.851681		7	27	0	NA	0	NA	0
AC010287,1	0.142592	0.851681		7	34	7	micOch1;nanGal1;hetGla2;capHir1;eptFus1;myoDav1;myoLuc2	24	papAnu2;chlSab2;rhiRox1;calJac3;saiBol1;tarSyr2;otoGar3;perManBai1;mm10;octDeg1;oryCun2;ochPri3;vicPac2;turTru2;orcOrc1;balAcu1;panHod1;bosTau8;bisBis1;equCab2;musFur1;odoRosDiv1;pteAle1;pteVam1	5
AQR	0.142894	0.851681		9	33	1	triMan1	0	NA	1
ADAMTS4	0.143039	0.851681		9	37	0	NA	0	NA	0
FTMT	0.143177	0.851681		9	32	0	NA	2	tarSyr2;turTru2	0
GHRHR	0.143222	0.851681		10	34	0	NA	0	NA	0
IDO1	0.14328	0.851681		9	35	1	chrAsi1	0	NA	1
HIST1H2BG	0.143393	0.851681		10	35	0	NA	0	NA	0
AADAC	0.14341	0.851681		8	29	3	nanGal1;eptFus1;triMan1	3	balAcu1;felCat8;pteVam1	3
GFRAL	0.143519	0.851681		10	35	0	NA	0	NA	0
CD163L1	0.143547	0.851681		5	21	2	conCri1;triMan1	5	perManBai1;cavPor3;bosTau8;bisBis1;felCat8	2
MARCKSL1	0.143708	0.851681		9	35	0	NA	1	panPan1	0
PCED1A	0.143745	0.851681		10	38	1	chrAsi1	0	NA	1
GLIPR1	0.144308	0.851681		9	36	0	NA	0	NA	0
KIAA0087	0.144453	0.851681		10	37	9	micOch1;nanGal1;hetGla2;capHir1;eptFus1;myoDav1;myoLuc2;conCri1;chrAsi1	25	rheMac3;macFas5;papAnu2;chlSab2;calJac3;tarSyr2;otoGar3;perManBai1;mm10;cavPor3;oryCun2;ochPri3;turTru2;orcOrc1;balAcu1;panHod1;bosTau8;bisBis1;equCab2;cerSim1;felCat8;canFam3;musFur1;odoRosDiv1;pteAle1	7
PRL	0.144695	0.851681		9	32	3	capHir1;eptFus1;myoLuc2	3	panHod1;bosTau8;bisBis1	2
MTHFS	0.14485	0.851681		7	37	0	NA	0	NA	0
C2orf16	0.144914	0.851681		6	23	3	micOch1;hetGla2;myoDav1	5	papAnu2;mm10;cavPor3;orcOrc1;panHod1	3
SPTBN1	0.144962	0.851681		9	32	0	NA	1	papAnu2	0
HSD11B1L	0.145131	0.851681		7	29	2	hetGla2;eptFus1	4	perManBai1;mm10;cavPor3;octDeg1	2
LNP1	0.145154	0.851681		9	35	1	nanGal1	4	panTro4;panPan1;rhiRox1;calJac3	1
CLSPN	0.145188	0.851681		10	30	1	eptFus1	0	NA	1
TMEM254	0.145407	0.851681		9	32	1	conCri1	0	NA	1
GLB1	0.14553	0.851681		10	33	0	NA	0	NA	0
GTSF1L	0.14568	0.851681		7	37	1	nanGal1	1	calJac3	1
LIM2	0.145701	0.851681		8	36	0	NA	0	NA	0
[truncated: 11,179 more rows]
