# Supplementary material for: Vision-related convergent gene losses reveal SERPINE3’s unknown role in the eye
Source: eLife. 2022 Jun 21;11:e77999. doi: 10.7554/eLife.77999 (PMC9355568; doi:10.7554/eLife.77999)
Supplement: Figure 1—source data 9. [file elife-77999-fig1-data9.xls]

## Sheet: Figure 1 - Source data 9
Figure 1 - Source data 9: Enrichment of candidate genes in different stages of the filtering process
A	Correction for multiple testing without requiring three convergent losses retrieves 68 genes (va < 1). Terms that are significantly enriched after correcting for multiple testing are in italics (adjusted p<0.05).
	Term	Overlap	P-value	Adjusted P-value	-log10 (Adjusted p-value)	Odds Ratio	Combined Score	Genes
	visual perception (GO:0007601)	8/93	9.45863e-10	9.09549e-08	7.04117	31.1325	646.901	CRYGS;GNAT2;RBP3;CRYBB3;CRYBA1;KRT12;CRYBA4;ARR3
	sensory perception of light stimulus (GO:0050953)	8/95	1.1229e-09	9.09549e-08	7.04117	30.4138	626.748	CRYGS;GNAT2;RBP3;CRYBB3;CRYBA1;KRT12;CRYBA4;ARR3
	negative regulation of leukocyte adhesion to vascular endothelial cell (GO:1904995)	1/5	0.0168863	0.259564	0.585755	74.3582	303.474	CCL28
	dendrite extension (GO:0097484)	1/6	0.0202297	0.259564	0.585755	59.4836	232.022	CDKL3
	negative regulation of cellular extravasation (GO:0002692)	1/6	0.0202297	0.259564	0.585755	59.4836	232.022	CCL28
B	Filtering for at least three convergent losses removes 37 genes. These genes are not enriched in eye-related terms.
	Term	Overlap	P-value	Adjusted P-value	-log10 (Adjusted p-value)	Odds Ratio	Combined Score	Genes
	negative regulation of leukocyte adhesion to vascular endothelial cell (GO:1904995)	1/5	0.00921666	0.139215	0.856314	138.604	649.602	CCL28
	dendrite extension (GO:0097484)	1/6	0.0110501	0.139215	0.856314	110.878	499.54	CDKL3
	negative regulation of cellular extravasation (GO:0002692)	1/6	0.0110501	0.139215	0.856314	110.878	499.54	CCL28
	regulation of DNA demethylation (GO:1901535)	1/6	0.0110501	0.139215	0.856314	110.878	499.54	DPPA3
	visual perception (GO:0007601)	2/93	0.0128172	0.139215	0.856314	12.4785	54.3684	GNAT2;RBP3
