# Supplementary material for: Vision-related convergent gene losses reveal SERPINE3’s unknown role in the eye
Source: eLife. 2022 Jun 21;11:e77999. doi: 10.7554/eLife.77999 (PMC9355568; doi:10.7554/eLife.77999)
Supplement: Figure 2—source data 1. [file elife-77999-fig2-data1.xls]

## Sheet: Figure 2 - Source data 1
Figure 2 - Source data 1: SERPINE3 intactness in 447 mammalian assemblies
TOGA automatically classifies transcripts into intact (no inactivating mutations in central 80% of coding sequence), lost (at least one inactivating mutation or larger deletion in the central 80% of coding region) or missing (<50% of transcript present because of assembly incompleteness). The annotation of SERPINE3 in 327 assemblies is complete (>80% of central coding region present and intact, m…
Assembly Name	Source	AssemblyAccession	Scientific Species Name	Common Species Name	Percent of reading frame that is intact (ignoring missing sequence parts)	Intactness classification	Comments
aotNan1	NCBI	GCF_000952055.2	Aotus nancymaae	Ma's night monkey	1	intact
balAcu1	NCBI	GCF_000493695.1	Balaenoptera acutorostrata scammoni	minke whale	0.990123	intact
bisBis1	NCBI	GCF_000754665.1	Bison bison bison	American bison	0.987654	intact
bosTau9	NCBI	GCF_002263795.1	Bos taurus	cattle	0.987654	intact
canFam4	NCBI	GCA_011100685.1	Canis lupus familiaris	dog	0.982716	intact
canFam5	NCBI	GCA_005444595.1	Canis lupus familiaris	dog	0.982716	intact
cavPor3	NCBI	GCF_000151735.1	Cavia porcellus	domestic guinea pig	0.990123	intact
cebCap1	NCBI	GCF_001604975.1	Cebus capucinus imitator	white-faced sapajou	1	intact
cerAty1	NCBI	GCF_000955945.1	Cercocebus atys	sooty mangabey	1	intact
cerSim1	NCBI	GCF_000283155.1	Ceratotherium simum simum	southern white rhinoceros	0.987654	intact
chiLan1	NCBI	GCF_000276665.1	Chinchilla lanigera	long-tailed chinchilla	0.990123	intact
chlSab2	NCBI	GCF_000409795.2	Chlorocebus sabaeus	green monkey	1	intact
colAng1	NCBI	GCF_000951035.1	Colobus angolensis palliatus	Angolan colobus	1	intact
dipOrd2	NCBI	GCF_000151885.1	Dipodomys ordii	Ord's kangaroo rat	0.985185	intact
enhLutKen1	NCBI	GCF_002288905.1	Enhydra lutris kenyoni	sea otter	0.985185	intact
enhLutNer1	NCBI	GCA_006410715.1	Enhydra lutris nereis	sea otter	0.985185	intact
equCab3	NCBI	GCF_002863925.1	Equus caballus	horse	0.987654	intact
equPrz1	NCBI	GCF_000696695.1	Equus przewalskii	Przewalski's horse	0.987654	intact
eriEur2	NCBI	GCF_000296755.1	Erinaceus europaeus	western European hedgehog	0.987654	intact
eulFla1	NCBI	GCA_001262665.1	Eulemur flavifrons	Sclater's lemur	0.990123	intact
eulMac1	NCBI	GCA_001262655.1	Eulemur macaco	black lemur	0.990123	intact
felCat9	NCBI	GCF_000181335.3	Felis catus	domestic cat	0.987654	intact
gorGor6	NCBI	GCF_008122165.1	Gorilla gorilla gorilla	western lowland gorilla	1	intact
HLaciJub2	NCBI	GCF_003709585.1	Acinonyx jubatus	cheetah	0.987654	intact
HLacoCah1	NCBI	GCA_004027535.1	Acomys cahirinus	Egyptian spiny mouse	0.975309	intact
HLacoRus1	NCBI	GCA_903995435.1	Acomys russatus	golden spiny mouse	0.975309	intact
HLaepMel1	NCBI	GCA_006408695.1	Aepyceros melampus	impala	0.982716	intact
HLailFul2	DNA Zoo Consortium	none	Ailurus fulgens	lesser panda	0.990123	intact
HLailMel2	NCBI	GCF_002007445.1	Ailuropoda melanoleuca	giant panda	0.990123	intact
HLalcAlc1	NCBI	GCA_007570765.1	Alces alces	Eurasian elk	0.990123	intact
HLallBul1	NCBI	GCA_004027895.1	Allactaga bullata	Gobi jerboa	0.987654	intact
HLallNig1	DNA Zoo Consortium	none	Allenopithecus nigroviridis	Allen's swamp monkey	1	intact
HLammLer1	NCBI	GCA_002201775.1	Ammotragus lervia	aoudad	0.985185	intact
HLantAme1	NCBI	GCA_007570785.1	Antilocapra americana	pronghorn	0.990123	intact
HLantMar1	NCBI	GCA_006408585.1	Antidorcas marsupialis	springbok	0.980247	intact
HLaplRuf1	NCBI	GCA_004027875.1	Aplodontia rufa	mountain beaver	0.990123	intact
HLapoSyl1	NCBI	GCA_001305905.1	Apodemus sylvaticus	European woodmouse	0.987654	intact
HLarcGaz2	NCBI	GCA_900642305.1	Arctocephalus gazella	antarctic fur seal	0.980247	intact
HLarvAmp1	NCBI	GCA_903992535.1	Arvicola amphibius	Eurasian water mole	0.987654	intact
HLarvNil1	NCBI	GCA_011762505.1	Arvicanthis niloticus	African grass rat	0.987654	intact
HLateGeo1	NCBI	GCA_004024785.1	Ateles geoffroyi	black-handed spider monkey	1	intact
HLaxiPor1	NCBI	GCA_003798545.1	Axis porcinus	Hog deer	0.990123	intact
HLbalBon1	NCBI	GCA_000978805.1	Balaenoptera bonaerensis	Antarctic minke whale	0.990123	intact
HLbalEde1	DNA Zoo Consortium	none	Balaenoptera edeni	pygmy Bryde's whale	0.990123	intact
HLbalMus1	NCBI	GCA_009873245.1	Balaenoptera musculus	Blue whale	0.990123	intact
HLbalMys1	http://alfred.liv.ac.uk/downloads/bowhead_whale/bowhead_whale_scaffolds.zip	none	Balaena mysticetus	bowhead whale	0.990123	intact
HLbasSum1	DNA Zoo Consortium	none	Bassariscus sumichrasti	Cacomistle	0.987654	intact
HLbeaHun1	NCBI	GCA_004027495.1	Beatragus hunteri	-	0.990123	intact
HLbosFro1	NCBI	GCA_007844835.1	Bos frontalis	gayal	0.987654	intact
HLbosGau1	NCBI	GCA_014182915.1	Bos gaurus	gaur	0.987654	intact
HLbosGru1	NCBI	GCA_005887515.2	Bos grunniens	domestic yak	0.987654	intact
HLbosInd2	NCBI	GCA_002933975.1	Bos indicus	zebu cattle	0.987654	intact
HLbosMut2	NCBI	GCA_007646595.3	Bos mutus	wild yak	0.987654	intact
HLbubBub2	NCBI	GCF_003121395.1	Bubalus bubalis	water buffalo	0.987654	intact
HLcalJac4	NCBI	GCA_011100555.1	Callithrix jacchus	white-tufted-ear marmoset	1	intact
HLcalUrs1	NCBI	GCF_003265705.1	Callorhinus ursinus	northern fur seal	0.982716	intact
HLcamDro2	NCBI	GCF_000803125.2	Camelus dromedarius	Arabian camel	0.987654	intact
HLcamFer3	NCBI	GCF_009834535.1	Camelus ferus	Wild Bactrian camel	0.987654	intact
HLcanLupDin1	NCBI	GCF_003254725.1	Canis lupus dingo	dingo	0.982716	intact
HLcapAeg1	NCBI	GCA_000765075.1	Capra aegagrus	wild goat	0.985185	intact
HLcapHir2	NCBI	GCF_001704415.1	Capra hircus	goat	0.985185	intact
HLcapPyg1	NCBI	GCA_012922965.1	Capreolus pygargus	Eastern roe deer	0.990123	intact
HLcapSib1	NCBI	GCA_003182615.2	Capra sibirica	Siberian ibex	0.985185	intact
HLcatWag1	NCBI	GCA_004024745.2	Catagonus wagneri	Chacoan peccary	0.987654	intact
HLcavTsc1	NCBI	GCA_004027695.1	Cavia tschudii	Montane guinea pig	0.990123	intact
HLcebAlb1	NCBI	GCA_004027755.1	Cebus albifrons	white-fronted capuchin	1	intact
HLcepHar1	NCBI	GCA_006410635.1	Cephalophus harveyi	Harvey's duiker	0.990123	intact
HLcerEla1	NCBI	GCA_002197005.1	Cervus elaphus hippelaphus	red deer	0.990123	intact
HLcerHanYar1	NCBI	GCA_010411085.1	Cervus hanglu yarkandensis	Yarkand deer	0.990123	intact
HLcerMon1	NCBI	GCA_014849445.1	Cercopithecus mona	Mona monkey	1	intact
HLcerNeg1	NCBI	GCA_004027615.1	Cercopithecus neglectus	De Brazza's monkey	1	intact
HLcerSimCot1	NCBI	GCA_004027795.1	Ceratotherium simum cottoni	northern white rhinoceros	0.987654	intact
HLcheMed1	NCBI	GCA_008086735.1	Cheirogaleus medius	Lesser dwarf lemur	0.990123	intact
HLcoePre1	DNA Zoo Consortium	none	Coendou prehensilis	-	0.987654	intact
HLconTau2	DNA Zoo Consortium	none	Connochaetes taurinus	brindled gnu	0.990123	intact
HLcriGam1	NCBI	GCA_004027575.1	Cricetomys gambianus	Gambian giant pouched rat	0.990123	intact
HLcriGri3	NCBI	GCF_003668045.1	Cricetulus griseus	Chinese hamster	0.987654	intact
HLcroCro1	NCBI	GCA_008692635.1	Crocuta crocuta	spotted hyena	0.990123	intact
HLcryFer2	DNA Zoo Consortium	none	Cryptoprocta ferox	fossa	0.953086	intact
HLcteGun1	NCBI	GCA_004027205.1	Ctenodactylus gundi	northern gundi	0.990123	intact
HLcteSoc1	NCBI	GCA_004027165.1	Ctenomys sociabilis	social tuco-tuco	0.990123	intact
HLcynBra1	NCBI	GCA_009793145.1	Cynopterus brachyotis	lesser short-nosed fruit bat	0.990123	intact
HLcynGun1	NCBI	GCA_011316645.1	Cynomys gunnisoni	Gunnison's prairie dog	0.990123	intact
HLdamLun1	NCBI	GCA_006408505.1	Damaliscus lunatus	topi	0.990123	intact
HLdasPun1	NCBI	GCA_004363535.1	Dasyprocta punctata	punctate agouti	0.990123	intact
HLdauMad1	NCBI	GCA_004027145.1	Daubentonia madagascariensis	aye-aye	0.990123	intact
HLdelLeu2	NCBI	GCF_002288925.2	Delphinapterus leucas	beluga whale	0.990123	intact
HLdicBic1	NCBI	GCA_004027315.2	Diceros bicornis	black rhinoceros	0.987654	intact
HLdicSum1	NCBI	GCA_002844835.1	Dicerorhinus sumatrensis sumatrensis	Sumatran rhinoceros	0.987654	intact
HLdinBra1	NCBI	GCA_004027595.1	Dinomys branickii	pacarana	0.985185	intact
HLdipSte1	NCBI	GCA_004024685.1	Dipodomys stephensi	Stephens's kangaroo rat	0.985185	intact
HLdolPat1	NCBI	GCA_004027295.1	Dolichotis patagonum	Patagonian cavy	0.990123	intact
HLeidDup1	DNA Zoo Consortium	none	Eidolon dupreanum	Malagasy straw-colored fruit bat	0.990123	intact
HLelaDav1	NCBI	GCA_002443075.1	Elaphurus davidianus	Pere David's deer	0.990123	intact
HLellTal1	NCBI	GCA_001685095.1	Ellobius talpinus	Northern mole vole	0.990123	intact
HLequAsi1	NCBI	GCF_001305755.1	Equus asinus	ass	0.980247	intact
HLequAsiAsi2	NCBI	GCA_003033725.1	Equus asinus asinus	ass	0.980247	intact
HLequQuaBoe1	DNA Zoo Consortium	none	Equus burchellii boehmi	-	0.980247	intact
HLereDor1	NCBI	GCA_006547115.1	Erethizon dorsatum	North American porcupine	0.987654	intact
HLeriBar1	DNA Zoo Consortium	none	Erignathus barbatus	bearded seal	0.985185	intact
HLescRob1	NCBI	GCA_004363415.1	Eschrichtius robustus	grey whale	0.990123	intact
HLeubGla1	DNA Zoo Consortium	none	Eubalaena glacialis	North Atlantic right whale	0.987654	intact
HLeubJap1	NCBI	GCA_004363455.1	Eubalaena japonica	North Pacific right whale	0.990123	intact
HLeudTho1	NCBI	GCA_006408755.1	Eudorcas thomsonii	Thomson's gazelle	0.985185	intact
HLeulFla1	DNA Zoo Consortium	none	Eulemur flavifrons	Sclater's lemur	NA	intact
HLeulFul1	NCBI	GCA_004027275.1	Eulemur fulvus	brown lemur	0.990123	intact
HLeumJub1	NCBI	GCF_004028035.1	Eumetopias jubatus	Steller sea lion	0.982716	intact
HLfelNig1	NCBI	GCA_004023925.1	Felis nigripes	black-footed cat	0.987654	intact
HLgalVar2	NCBI	GCA_004027255.2	Galeopterus variegatus	Sunda flying lemur	0.990123	intact
HLgirCam1	NCBI	GCA_006408565.1	Giraffa camelopardalis	giraffe	0.990123	intact
HLgirCam2	DNA Zoo Consortium	none	Giraffa camelopardalis	giraffe	0.990123	intact
HLgirTip1	NCBI	GCA_001651235.1	Giraffa tippelskirchi	-	0.990123	intact
HLgliGli1	NCBI	GCA_004027185.1	Glis glis	Fat dormouse	0.990123	intact
HLgloMel1	NCBI	GCF_006547405.1	Globicephala melas	long-finned pilot whale	0.990123	intact
HLgraMur1	NCBI	GCA_004027655.1	Graphiurus murinus	woodland dormouse	0.990123	intact
HLgraSur1	NCBI	GCF_004785775.1	Grammomys surdaster	-	0.987654	intact
HLgulGul1	NCBI	GCA_900006375.2	Gulo gulo	wolverine	0.990123	intact
HLhalGry1	NCBI	GCA_012393455.1	Halichoerus grypus	gray seal	0.982716	intact
HLhelPar1	NCBI	GCA_004023845.1	Helogale parvula	dwarf mongoose	0.990123	intact
HLhemHyl1	NCBI	GCA_004026825.1	Hemitragus hylocrius	Nilgiri tahr	0.985185	intact
HLhetBru1	NCBI	GCA_004026845.1	Heterohyrax brucei	yellow-spotted hyrax	0.992593	intact
HLhipAmp3	NCBI	GCA_004027065.2	Hippopotamus amphibius	hippopotamus	0.985185	intact
HLhipEqu1	NCBI	GCA_016433095.1	Hippotragus equinus	roan antelope	0.990123	intact
HLhipNig1	NCBI	GCA_006942125.1	Hippotragus niger niger	sable antelope	0.990123	intact
HLhyaHya1	NCBI	GCA_003009895.1	Hyaena hyaena	striped hyena	0.990123	intact
HLhydHyd1	NCBI	GCA_004027455.1	Hydrochoerus hydrochaeris	capybara	0.990123	intact
HLhydIne1	NCBI	GCA_006459105.1	Hydropotes inermis	Chinese water deer	0.990123	intact
HLhylMol2	NCBI	GCF_009828535.2	Hylobates moloch	silvery gibbon	1	intact
HLhysCri1	NCBI	GCA_004026905.1	Hystrix cristata	crested porcupine	0.990123	intact
HLindInd1	NCBI	GCA_004363605.1	Indri indri	-	0.990123	intact
HLkobEll1	NCBI	GCA_006410655.1	Kobus ellipsiprymnus	waterbuck	0.990123	intact
HLkobLecLec1	NCBI	GCA_014926565.1	Kobus leche leche	lechwe	0.990123	intact
HLlagObl1	NCBI	GCF_003676395.1	Lagenorhynchus obliquidens	Pacific white-sided dolphin	0.990123	intact
HLlamGla1	DNA Zoo Consortium	none	Lama glama	llama	0.987654	intact
HLlamGlaCha1	NCBI	GCA_013239585.1	Lama glama chaku	llama	0.987654	intact
HLlamGuaCac1	NCBI	GCA_013239625.1	Lama guanicoe cacsilensis	guanaco	0.987654	intact
HLlemCat1	NCBI	GCA_004024665.1	Lemur catta	Ring-tailed lemur	0.990123	intact
HLlepAme1	NCBI	GCA_004026855.1	Lepus americanus	snowshoe hare	0.990123	intact
HLlitWal1	NCBI	GCA_006410535.1	Litocranius walleri	gerenuk	0.980247	intact
HLlniGeo1	NCBI	GCA_004363515.1	Inia geoffrensis	boutu	0.990123	intact
HLlonCan1	NCBI	GCF_010015895.1	Lontra canadensis	Northern American river otter	0.982716	intact
HLlutLut1	NCBI	GCA_902655055.1	Lutra lutra	Eurasian river otter	0.990123	intact
HLlycPic2	NCBI	GCA_004216515.1	Lycaon pictus	African hunting dog	0.975309	intact
HLlycPic3	DNA Zoo Consortium	none	Lycaon pictus	African hunting dog	0.975309	intact
HLlynCan1	NCBI	GCF_007474595.1	Lynx canadensis	Canada lynx	0.987654	intact
HLlynPar1	NCBI	GCA_900661375.1	Lynx pardinus	Spanish lynx	0.987654	intact
HLmacFas6	NCBI	GCA_012559485.1	Macaca fascicularis	crab-eating macaque	1	intact
HLmacFus1	DNA Zoo Consortium	none	Macaca fuscata	Japanese macaque	1	intact
HLmacSob1	NCBI	GCA_004027375.1	Macroglossus sobrinus	-	0.987654	intact
HLmanSph1	NCBI	GCA_004802615.1	Mandrillus sphinx	mandrill	1	intact
HLmarFla1	NCBI	GCA_003676075.2	Marmota flaviventris	yellow-bellied marmot	0.990123	intact
HLmarHim1	NCBI	GCA_005280165.1	Marmota himalayana	Himalayan marmot	0.990123	intact
HLmarMon2	NCBI	GCA_014533835.1	Marmota monax	woodchuck	0.990123	intact
HLmarVan1	NCBI	GCA_005458795.1	Marmota vancouverensis	Vancouver marmot	0.990123	intact
HLmarZib1	NCBI	GCA_012583365.1	Martes zibellina	sable	0.990123	intact
HLmasCou1	NCBI	GCF_008632895.1	Mastomys coucha	southern multimammate mouse	0.987654	intact
HLmegNov1	NCBI	GCA_004329385.1	Megaptera novaeangliae	humpback whale	0.990123	intact
HLmelCap1	NCBI	GCA_004024625.1	Mellivora capensis	ratel	0.980247	intact
HLmerUng1	NCBI	GCF_002204375.1	Meriones unguiculatus	Mongolian gerbil	0.987654	intact
HLmesBid1	NCBI	GCA_004027085.1	Mesoplodon bidens	Sowerby's beaked whale	0.990123	intact
HLmicAgr2	NCBI	GCA_902806775.1	Microtus agrestis	short-tailed field vole	0.987654	intact
HLmicArv1	NCBI	GCA_007455615.1	Microtus arvalis	Common vole	0.987654	intact
HLmicFor1	NCBI	GCA_014885135.1	Microtus fortis	reed vole	0.987654	intact
HLmicOec1	NCBI	GCA_007455595.1	Microtus oeconomus	root vole	0.987654	intact
HLmicSpe31	NCBI	GCA_008750915.1	Microcebus sp. 3 GT-2019	-	0.990123	intact
HLmicTav1	NCBI	GCA_008750935.1	Microcebus tavaratra	-	0.990123	intact
HLmirAng2	DNA Zoo Consortium	none	Mirounga angustirostris	Northern elephant seal	0.982716	intact
HLmirCoq1	NCBI	GCA_004024645.1	Mirza coquereli	Coquerel's mouse lemur	0.990123	intact
HLmirLeo1	NCBI	GCF_011800145.1	Mirounga leonina	Southern elephant seal	0.982716	intact
HLmirZaz1	NCBI	GCA_008750895.1	Mirza zaza	-	0.990123	intact
HLmosBer1	NCBI	GCA_006459085.1	Moschus berezovskii	Chinese forest musk deer	0.975309	intact
HLmosMos1	NCBI	GCA_004024705.2	Moschus moschiferus	Siberian musk deer	0.987654	intact
HLmunCri1	NCBI	GCA_006408485.1	Muntiacus crinifrons	black muntjac	0.990123	intact
HLmunMug1	NCBI	GCA_004023785.1	Mungos mungo	banded mongoose	0.990123	intact
HLmunMun1	NCBI	GCA_008782695.1	Muntiacus muntjak	muntjak	0.990123	intact
HLmunRee1	NCBI	GCA_008787405.1	Muntiacus reevesi	Reeves' muntjac	0.987654	intact
HLmusAve1	NCBI	GCA_004027005.1	Muscardinus avellanarius	hazel dormouse	0.990123	intact
HLmusCar1	NCBI	GCF_900094665.1	Mus caroli	Ryukyu mouse	0.985185	intact
HLmusErm1	NCBI	GCF_009829155.1	Mustela erminea	ermine	0.990123	intact
HLmusFur2	NCBI	GCA_011764305.1	Mustela putorius furo	domestic ferret	0.990123	intact
HLmusPah1	NCBI	GCF_900095145.1	Mus pahari	shrew mouse	0.985185	intact
HLmusSpi1	NCBI	GCA_003336285.1	Mus spicilegus	steppe mouse	0.985185	intact
HLmusSpr1	NCBI	GCA_001624865.1	Mus spretus	western wild mouse	0.985185	intact
HLmyoCoy1	NCBI	GCA_004027025.1	Myocastor coypus	nutria	0.990123	intact
HLmyoGla2	NCBI	GCA_902806735.1	Myodes glareolus	Bank vole	0.987654	intact
HLnanGra1	NCBI	GCA_006408635.1	Nanger granti	Grant's gazelle	0.985185	intact
HLneoAsi1	NCBI	GCF_003031525.1	Neophocaena asiaeorientalis asiaeorientalis	Yangtze finless porpoise	0.990123	intact
HLneoMos1	NCBI	GCA_006410615.1	Neotragus moschatus	suni	0.985185	intact
HLneoNeb1	DNA Zoo Consortium	none	Neofelis nebulosa	Clouded leopard	0.980247	intact
HLneoVis1	NCBI	GCA_900108605.1	Neovison vison	American mink	0.987654	intact
HLnomLeu4	NCBI	GCF_006542625.1	Nomascus leucogenys	northern white-cheeked gibbon	1	intact
HLnycCou1	NCBI	GCA_004027815.1	Nycticebus coucang	slow loris	0.965432	intact
HLodoHem1	NCBI	GCA_004115125.1	Odocoileus hemionus hemionus	mule deer	0.990123	intact
HLodoRos1	DNA Zoo Consortium	none	Odobenus rosmarus	walrus	0.982716	intact
HLondZib1	NCBI	GCA_004026605.1	Ondatra zibethicus	muskrat	0.987654	intact
HLonyTor1	NCBI	GCA_903995425.1	Onychomys torridus	southern grasshopper mouse	0.990123	intact
HLoreAme1	NCBI	GCA_009758055.1	Oreamnos americanus	mountain goat	0.985185	intact
HLoreOre1	NCBI	GCA_006410675.1	Oreotragus oreotragus	klipspringer	0.990123	intact
HLoryCun3	NCBI	GCA_009806435.1	Oryctolagus cuniculus	rabbit	0.990123	intact
HLoryCunCun4	NCBI	GCA_013371645.1	Oryctolagus cuniculus cuniculus	rabbit	0.990123	intact
HLoryDam1	DNA Zoo Consortium	none	Oryx dammah	scimitar-horned oryx	0.990123	intact
HLoryGaz1	NCBI	GCA_003945745.1	Oryx gazella	gemsbok	0.985185	intact
HLoviAmm1	NCBI	GCA_003121645.1	Ovis ammon	argali	0.985185	intact
HLoviAri5	NCBI	GCA_011170295.1	Ovis aries	sheep	0.987654	intact
HLoviCan2	NCBI	GCA_004026945.1	Ovis canadensis	bighorn sheep	0.985185	intact
HLoviNivLyd1	NCBI	GCA_903231385.1	Ovis nivicola lydekkeri	snow sheep	0.985185	intact
HLoviOri1	NCBI	GCA_014523465.1	Ovis orientalis	Asiatic mouflon	0.985185	intact
HLpanLeo1	NCBI	GCA_008795835.1	Panthera leo	lion	0.980247	intact
HLpanOnc1	NCBI	GCA_004023805.1	Panthera onca	jaguar	0.980247	intact
HLpanOnc2	DNA Zoo Consortium	none	Panthera onca	jaguar	0.980247	intact
HLpanPar1	NCBI	GCF_001857705.1	Panthera pardus	leopard	0.980247	intact
HLpapAnu5	NCBI	GCF_008728515.1	Papio anubis	olive baboon	1	intact
HLpedCap1	NCBI	GCA_007922755.1	Pedetes capensis	springhare	0.990123	intact
HLpepEle1	DNA Zoo Consortium	none	Peponocephala electra	melon-headed whale	0.990123	intact
HLperCal2	NCBI	GCA_007827085.2	Peromyscus californicus insignis	California mouse	0.990123	intact
HLperCri1	DNA Zoo Consortium	none	Peromyscus crinitus	-	0.990123	intact
HLperEre1	NCBI	GCA_902702925.1	Peromyscus eremicus	cactus mouse	0.990123	intact
HLperLeu1	NCBI	GCF_004664715.1	Peromyscus leucopus	white-footed mouse	0.990123	intact	Duplication and pseudogenization of one copy
HLperLonPac1	NCBI	GCA_004363475.1	Perognathus longimembris pacificus	Pacific pocket mouse	0.987654	intact
HLperManBai2	NCBI	GCA_003704035.1	Peromyscus maniculatus bairdii	prairie deer mouse	0.990123	intact
HLperNas1	DNA Zoo Consortium	none	Peromyscus nasutus	northern rock mouse	0.990123	intact
HLperPol1	NCBI	GCA_003704135.2	Peromyscus polionotus subgriseus	oldfield mouse	0.953086	intact
HLpetTyp1	NCBI	GCA_004026965.1	Petromus typicus	dassie-rat	0.990123	intact
HLphoPho1	NCBI	GCA_004363495.1	Phocoena phocoena	harbor porpoise	0.990123	intact
HLphoPho2	DNA Zoo Consortium	none	Phocoena phocoena	harbor porpoise	0.990123	intact
HLphoSin1	NCBI	GCF_008692025.1	Phocoena sinus	vaquita	0.990123	intact
HLphoVit1	NCBI	GCF_004348235.1	Phoca vitulina	harbor seal	0.982716	intact
HLphyCat2	NCBI	GCF_002837175.2	Physeter catodon	sperm whale	0.990123	intact
HLpilTep2	NCBI	GCF_002776525.3	Piliocolobus tephrosceles	Ugandan red Colobus	1	intact
HLpitPit1	NCBI	GCA_004026645.1	Pithecia pithecia	white-faced saki	1	intact
HLplaMin1	NCBI	GCA_004363435.1	Platanista minor	Indus River dolphin	0.990123	intact
HLpleDon1	NCBI	GCA_004027715.1	Plecturocebus donacophilus	Bolivian titi	1	intact
HLponBla1	NCBI	GCA_011754075.1	Pontoporia blainvillei	franciscana	0.990123	intact
HLpotFla1	DNA Zoo Consortium	none	Potos flavus	kinkajou	0.990123	intact
HLpriBen1	NCBI	GCA_005406085.1	Prionailurus bengalensis euptilurus	Amur leopard cat	0.987654	intact
HLproCap3	NCBI	GCA_004026925.2	Procavia capensis	Cape rock hyrax	0.992593	intact
HLproLot1	DNA Zoo Consortium	none	Procyon lotor	raccoon	0.980247	intact
HLproPrz1	NCBI	GCA_006410515.1	Procapra przewalskii	Przewalski's gazelle	0.980247	intact
HLproSim1	NCBI	GCA_003258685.1	Prolemur simus	greater bamboo lemur	0.990123	intact
HLprzAlb1	NCBI	GCA_006408465.1	Przewalskium albirostris	white-lipped deer	0.990123	intact
HLpsaObe1	NCBI	GCA_002215935.2	Psammomys obesus	fat sand rat	0.982716	intact
HLpteBra2	DNA Zoo Consortium	none	Pteronura brasiliensis	giant otter	0.990123	intact
HLpteGig1	NCBI	GCA_902729225.1	Pteropus giganteus	Indian flying fox	0.990123	intact
HLptePse1	NCBI	GCA_014363405.1	Pteropus pselaphon	Bonin flying fox	0.990123	intact
HLpteRuf1	DNA Zoo Consortium	none	Pteropus rufus	Malagasy flying fox	0.990123	intact
HLpteVam2	NCBI	GCF_000151845.1	Pteropus vampyrus	large flying fox	0.990123	intact
HLpumCon1	NCBI	GCF_003327715.1	Puma concolor	puma	0.958025	intact
HLpumYag1	NCBI	GCA_014898765.1	Puma yagouaroundi	jaguarundi	0.990123	intact
HLpygNem1	NCBI	GCA_004024825.1	Pygathrix nemaeus	Red shanked douc langur	1	intact
HLranTarGra2	NCBI	GCA_014898785.1	Rangifer tarandus granti	reindeer	0.990123	intact
HLratNor7	NCBI	GCA_015227675.1	Rattus norvegicus	Norway rat	0.987654	intact
HLratRat7	NCBI	GCF_011064425.1	Rattus rattus	black rat	0.950617	intact
HLrhiPru1	NCBI	GCA_009823505.1	Rhizomys pruinosus	hoary bamboo rat	0.990123	intact
HLrhiRox2	NCBI	GCF_007565055.1	Rhinopithecus roxellana	golden snub-nosed monkey	1	intact
HLrhiUni1	DNA Zoo Consortium	none	Rhinoceros unicornis	greater Indian rhinoceros	0.987654	intact
HLrouAeg4	Bat1K published	none	Rousettus aegyptiacus	Egyptian rousette	0.990123	intact
HLrouLes1	NCBI	GCA_015472975.1	Rousettus leschenaultii	Leschenault's rousette	0.990123	intact
HLrouMad1	DNA Zoo Consortium	none	Rousettus madagascariensis	Madagascan rousette	0.990123	intact
HLsacBil1	Bat1K	none	Saccopteryx bilineata	greater sac-winged bat	0.990123	intact	Duplication and pseudogenization of one copy
HLsagImp1	NCBI	GCA_004024885.1	Saguinus imperator	tamarin	1	intact
HLsaiTat1	NCBI	GCA_004024985.1	Saiga tatarica	-	0.977778	intact
HLsapApe1	NCBI	GCF_009761245.1	Sapajus apella	Tufted capuchin	1	intact
HLsciCar1	NCBI	GCA_902686445.1	Sciurus carolinensis	gray squirrel	0.990123	intact
HLsciVul1	NCBI	GCA_902686455.1	Sciurus vulgaris	Eurasian red squirrel	0.990123	intact
HLsigHis1	NCBI	GCA_004025045.1	Sigmodon hispidus	hispid cotton rat	0.980247	intact
HLsouChi1	NCBI	GCA_007760645.1	Sousa chinensis	Indo-pacific humpbacked dolphin	0.990123	intact
HLspeDau1	NCBI	GCA_002406435.1	Spermophilus dauricus	Daurian ground squirrel	0.990123	intact
HLspiGra1	NCBI	GCA_004023965.1	Spilogale gracilis	western spotted skunk	0.985185	intact
HLsurSur1	NCBI	GCF_006229205.1	Suricata suricatta	meerkat	0.990123	intact
HLsurSur2	NCBI	GCA_004023905.1	Suricata suricatta	meerkat	0.990123	intact
HLsylBac1	DNA Zoo Consortium	none	Sylvilagus bachmani	brush rabbit	0.990123	intact
HLsylGri1	NCBI	GCA_006408735.1	Sylvicapra grimmia	bush duiker	0.990123	intact
HLsynCaf1	NCBI	GCA_902500845.1	Syncerus caffer	African buffalo	0.987654	intact
HLtapInd1	NCBI	GCA_004024905.1	Tapirus indicus	Asiatic tapir	0.987654	intact
HLtapInd2	DNA Zoo Consortium	none	Tapirus indicus	Asiatic tapir	0.987654	intact
HLtapTer1	NCBI	GCA_004025025.1	Tapirus terrestris	Brazilian tapir	0.987654	intact
HLtaxTax1	NCBI	GCA_003697995.1	Taxidea taxus jeffersonii	American badger	0.990123	intact
HLthrSwi1	NCBI	GCA_004025085.1	Thryonomys swinderianus	Greater cane rat	0.990123	intact
HLtraFra1	NCBI	GCF_009764315.1	Trachypithecus francoisi	Francois's langur	1	intact
HLtraImb1	NCBI	GCA_006410775.1	Tragelaphus imberbis	lesser kudu	0.990123	intact
HLtraJav1	NCBI	GCA_004024965.2	Tragulus javanicus	Java mouse-deer	0.990123	intact
HLtraScr1	NCBI	GCA_006410495.1	Tragelaphus scriptus	bushbuck	0.990123	intact
HLtraStr1	NCBI	GCA_006410795.1	Tragelaphus strepsiceros	greater kudu	0.990123	intact
HLturAdu1	NCBI	GCA_003227395.1	Tursiops aduncus	Indo-pacific bottlenose dolphin	0.990123	intact
HLturAdu2	DNA Zoo Consortium	none	Tursiops aduncus	Indo-pacific bottlenose dolphin	0.990123	intact
HLturTru4	NCBI	GCF_011762595.1	Tursiops truncatus	common bottlenose dolphin	0.990123	intact
HLuroPar1	NCBI	GCF_003426925.1	Urocitellus parryii	Arctic ground squirrel	0.990123	intact
HLursAme2	DNA Zoo Consortium	none	Ursus americanus	American black bear	0.990123	intact
HLursArc1	NCBI	GCF_003584765.1	Ursus arctos horribilis	brown bear	0.990123	intact
HLursThi1	NCBI	GCA_009660055.1	Ursus thibetanus thibetanus	Asiatic black bear	0.990123	intact
HLvicPacHua3	NCBI	GCA_000767525.1	Vicugna pacos huacaya	alpaca	0.987654	intact
HLvicVicMen1	NCBI	GCA_013265495.1	Vicugna vicugna mensalis	vicugna	0.987654	intact
HLxerIna1	NCBI	GCA_004024805.1	Xerus inauris	South African ground squirrel	0.990123	intact
HLzalCal1	NCBI	GCA_009762305.1	Zalophus californianus	California sea lion	0.982716	intact
HLzapHud1	NCBI	GCA_004024765.1	Zapus hudsonius	meadow jumping mouse	0.990123	intact
HLzipCav1	NCBI	GCA_004364475.1	Ziphius cavirostris	Cuvier's beaked whale	0.990123	intact
jacJac1	NCBI	GCF_000280705.1	Jaculus jaculus	lesser Egyptian jerboa	0.985185	intact
lepWed1	NCBI	GCF_000349705.1	Leptonychotes weddellii	Weddell seal	0.982716	intact
lipVex1	NCBI	GCF_000442215.1	Lipotes vexillifer	Yangtze River dolphin	0.990123	intact
macNem1	NCBI	GCF_000956065.1	Macaca nemestrina	pig-tailed macaque	1	intact
manLeu1	NCBI	GCF_000951045.1	Mandrillus leucophaeus	drill	1	intact
micMur3	NCBI	GCF_000165445.2	Microcebus murinus	gray mouse lemur	0.990123	intact
micOch1	NCBI	GCF_000317375.1	Microtus ochrogaster	prairie vole	0.987654	intact
mm10	NCBI	GCF_000001635.20	Mus musculus	house mouse	0.985185	intact
mm39	NCBI	GCF_000001635.27	Mus musculus	house mouse	0.985185	intact
nasLar1	NCBI	GCA_000772465.1	Nasalis larvatus	proboscis monkey	1	intact
neoSch1	NCBI	GCF_002201575.1	Neomonachus schauinslandi	Hawaiian monk seal	0.985185	intact
octDeg1	NCBI	GCF_000260255.1	Octodon degus	degu	0.990123	intact
odoRosDiv1	NCBI	GCF_000321225.1	Odobenus rosmarus divergens	Pacific walrus	0.982716	intact
orcOrc1	NCBI	GCF_000331955.2	Orcinus orca	killer whale	0.990123	intact
oryCun2	NCBI	GCF_000003625.2	Oryctolagus cuniculus	rabbit	0.990123	intact
otoGar3	NCBI	GCF_000181295.1	Otolemur garnettii	small-eared galago	0.965432	intact
panHod1	NCBI	GCF_000400835.1	Pantholops hodgsonii	chiru	0.985185	intact
panPan3	NCBI	GCF_013052645.1	Pan paniscus	pygmy chimpanzee	1	intact
panTig1	NCBI	GCF_000464555.1	Panthera tigris altaica	Amur tiger	0.980247	intact
panTro6	NCBI	GCF_002880755.1	Pan troglodytes	chimpanzee	1	intact
ponAbe3	NCBI	GCF_002880775.1	Pongo abelii	Sumatran orangutan	1	intact
proCoq1	NCBI	GCF_000956105.1	Propithecus coquereli	Coquerel's sifaka	0.990123	intact
pteAle1	NCBI	GCF_000325575.1	Pteropus alecto	black flying fox	0.97284	intact
rheMac10	NCBI	GCF_003339765.1	Macaca mulatta	Rhesus monkey	1	intact
rhiBie1	NCBI	GCF_001698545.1	Rhinopithecus bieti	black snub-nosed monkey	1	intact
rn6	NCBI	GCF_000001895.5	Rattus norvegicus	Norway rat	0.987654	intact
saiBol1	NCBI	GCF_000235385.1	Saimiri boliviensis boliviensis	Bolivian squirrel monkey	1	intact
speTri2	NCBI	GCF_000236235.1	Ictidomys tridecemlineatus	thirteen-lined ground squirrel	0.990123	intact
susScr11	NCBI	GCF_000003025.6	Sus scrofa	pig	0.992593	intact
tarSyr2	NCBI	GCF_000164805.1	Carlito syrichta	Philippine tarsier	0.982716	intact
tupChi1	NCBI	GCF_000334495.1	Tupaia chinensis	Chinese tree shrew	0.962963	intact
HLnasNar1	DNA Zoo Consortium	none	Nasua narica	White-nosed coati	0.424691	intact
HLoviCan1	NCBI	GCA_001039535.1	Ovis canadensis canadensis	bighorn sheep	0.261728	intact	Intact in different assembly of same species (HLoviCan2, GCA_004026945.1, %intact 0,994052)
HLcasCan3	DNA Zoo Consortium	none	Castor canadensis	American beaver	NA	unclear: missing	SERPINE3 locus is not in the assembly but overlaps an assembly gap.
chrAsi1	NCBI	GCF_000296735.1	Chrysochloris asiatica	Cape golden mole	0.138272	lost
conCri1	NCBI	GCF_000260355.1	Condylura cristata	star-nosed mole	0.219753	lost
dasNov3	NCBI	GCF_000208655.1	Dasypus novemcinctus	nine-banded armadillo	0.148148	lost
echTel2	NCBI	GCF_000313985.1	Echinops telfairi	small Madagascar hedgehog	0.0345679	lost	Splice site acceptor mutation at exon 8 is supported by blast against sequencing data (SRX044032, SRX044031). Loss status confirmed.
eleEdw1	NCBI	GCF_000299155.1	Elephantulus edwardii	Cape elephant shrew	0.130864	lost
eptFus1	NCBI	GCF_000308155.1	Eptesicus fuscus	big brown bat	0.338272	lost
hetGla2	NCBI	GCF_000247695.1	Heterocephalus glaber	naked mole rat	0.345679	lost	Each of the three individual inactivating mutations is supported by blast against sequencing data (SRX171625, SRX047047, SRX047046).
HLaeoCin1	NCBI	GCA_011751065.1	Aeorestes cinereus	hoary bat	0.155556	lost
HLanoCau1	NCBI	GCA_004027475.1	Anoura caudifer	tailed tailless bat	0.140741	lost
HLartJam2	NCBI	GCA_014825515.1	Artibeus jamaicensis	Jamaican fruit-eating bat	0.140741	lost
HLaseSto2	Bat1K	none	Aselliscus stoliczkanus	Stoliczka's trident bat	0.476543	lost
HLcarPer2	Hillerlab	none	Carollia perspicillata	Seba's short-tailed bat	0.140741	lost
HLchoDid1	NCBI	GCA_004027855.1	Choloepus didactylus	southern two-toed sloth	0.279012	lost
HLchoDid2	NCBI	GCF_015220235.1	Choloepus didactylus	southern two-toed sloth	0.279012	lost
HLchoHof3	DNA Zoo Consortium	none	Choloepus hoffmanni	Hoffmann's two-fingered sloth	0.279012	lost
HLcraTho1	NCBI	GCA_004027555.1	Craseonycteris thonglongyai	hog-nosed bat	0.335802	lost
HLdesRot2	https://sid.erda.dk/share_redirect/gBu4tuc7qz/Dovetail_v2/vampire_bat_10Aug2015_WXtkA.fasta	none	Desmodus rotundus	common vampire bat	0.133333	lost
HLdugDug1	NCBI	GCA_015147995.1	Dugong dugon	dugong	0.476543	lost	Frame shift mutation in exon3 and splice site acceptor mutation in exon6 are confirmed by blast against SRA DRR251525. Loss status confirmed.
HLfukDam2	NCBI	GCF_012274545.1	Fukomys damarensis	Damara mole rat	0.241975	lost
HLgloSor2	Hillerlab	none	Glossophaga soricina	Pallas's long-tongued bat	0.160494	lost
HLhipArm1	NCBI	GCF_001890085.1	Hipposideros armiger	great roundleaf bat	0.491358	lost
HLhipCyc2	Bat1K	none	Doryrhina cyclops	cyclops roundleaf bat	0.237037	lost
HLhipGal1	NCBI	GCA_004027415.1	Hipposideros galeritus	Cantor's roundleaf bat	0.42963	lost
HLhipLar2	Bat1K	none	Hipposideros larvatus	-	0.31358	lost
HLlasBor1	NCBI	GCA_004026805.1	Lasiurus borealis	red bat	0.241975	lost
HLlepYer1	GIGADB	none	Leptonycteris yerbabuenae	Lesser long-nosed bat	0.140741	lost
HLmacCal1	NCBI	GCA_007922815.1	Macrotus californicus	California big-eared bat	0.202469	lost
HLmanJav2	NCBI	GCA_014570535.1	Manis javanica	Malayan pangolin	0.0345679	lost
HLmanPen2	NCBI	GCA_014570555.1	Manis pentadactyla	Chinese pangolin	0.0691358	lost
HLmanTri1	NCBI	GCA_004765945.1	Manis tricuspis	Tree pangolin	0.140741	lost
HLmicHir1	NCBI	GCA_004026765.1	Micronycteris hirsuta	-	0.158025	lost
HLmicTal1	NCBI	GCA_004026705.1	Microgale talazaci	Talazac's shrew tenrec	0.0345679	lost
HLminNat1	NCBI	GCF_001595765.1	Miniopterus natalensis	-	0.308642	lost
HLminSch1	NCBI	GCA_004026525.1	Miniopterus schreibersii	Schreibers' long-fingered bat	0.338272	lost
HLmolMol2	Bat1K published	none	Molossus molossus	Pallas's mastiff bat	0.182716	lost
HLmorBla1	NCBI	GCA_004026545.1	Mormoops blainvillei	Antillean ghost-faced bat	0.192593	lost
HLmurAurFea1	NCBI	GCA_004026665.1	Murina aurata feae	Little tube-nosed bat	0.123457	lost
HLmyoLuc1	DNA Zoo Consortium	none	Myotis lucifugus	little brown bat	0.320988	lost
HLmyoMyo6	Bat1K published	none	Myotis myotis	-	0.340741	lost
HLmyoSep1	DNAzoo https://www.dnazoo.org/assemblies/Myotis_septentrionalis	none	Myotis septentrionalis	Northern long-eared myotis	0.28642	lost
HLmyrTri1	NCBI	GCA_004026745.1	Myrmecophaga tridactyla	giant anteater	0.234568	lost
HLnatTum1	Bat1K	none	Natalus tumidirostris	Trinidadian funnel-eared bat	0.479012	lost
HLnocLep1	NCBI	GCA_004026585.1	Noctilio leporinus	greater bulldog bat	0.0641975	lost
HLnocLep2	Bat1K	none	Noctilio leporinus	greater bulldog bat	0.0641975	lost
HLnycHum2	NCBI	GCA_007922795.1	Nycticeius humeralis	evening bat	0.353086	lost
HLphaTri2	DNA Zoo Consortium	none	Manis tricuspis	Tree pangolin	0.140741	lost
HLphyDis3	Bat1K published	none	Phyllostomus discolor	pale spear-nosed bat	0.0814815	lost
HLpipKuh2	Bat1K published	none	Pipistrellus kuhlii	Kuhl's pipistrelle	0.158025	lost
HLpipPip2	NCBI	GCA_903992545.1	Pipistrellus pipistrellus	common pipistrelle	0.116049	lost
HLrhiSed2	Bat1K	none	Rhinolophus sedulus	lesser woolly horseshoe bat	0.474074	lost
HLscaAqu1	NCBI	GCA_004024925.1	Scalopus aquaticus	eastern mole	0.271605	lost
HLsolPar1	NCBI	GCA_004363575.1	Solenodon paradoxus	Hispaniolan solenodon	0.123457	lost
HLstuHon1	NCBI	GCA_014824575.1	Sturnira hondurensis	-	0.0814815	lost
HLtadBra2	Bat1K	none	Tadarida brasiliensis	Brazilian free-tailed bat	0.348148	lost
HLtalOcc1	NCBI	GCA_014898055.1	Talpa occidentalis	Iberian mole	0.422222	lost
HLtamTet1	NCBI	GCA_004025105.1	Tamandua tetradactyla	southern tamandua	0.279012	lost
HLtolMat1	NCBI	GCA_004025125.1	Tolypeutes matacus	-	0.204938	lost
HLtonSau1	NCBI	GCA_004024845.1	Tonatia saurophila	stripe-headed round-eared bat	0.0716049	lost
HLuroGra1	NCBI	GCA_004024945.1	Uropsilus gracilis	gracile shrew mole	0.165432	lost
myoBra1	NCBI	GCF_000412655.1	Myotis brandtii	Brandt's bat	0.545679	lost
myoDav1	NCBI	GCF_000327345.1	Myotis davidii	David's myotis	0.118519	lost
myoLuc2	NCBI	GCF_000147115.1	Myotis lucifugus	little brown bat	0.320988	lost
nanGal1	NCBI	GCF_000622305.1	Nannospalax galili	Upper Galilee mountains blind mole rat	0.22963	lost
oryAfe1	NCBI	GCF_000298275.1	Orycteropus afer afer	aardvark	0.187654	lost
ptePar1	NCBI	GCA_000465405.1	Pteronotus parnellii	Parnell's mustached bat	0.0765432	lost
sorAra2	NCBI	GCF_000181275.1	Sorex araneus	European shrew	0.306173	lost
HLcapIbe1	NCBI	GCA_006410555.1	Capra ibex	Alpine ibex	NA	unclear: missing	SERPINE3 locus and surrounding syntenic region are not in the assembly.
HLmosChr1	NCBI	GCA_006461725.1	Moschus chrysogaster	alpine musk deer	0.283951	intact
HLredRed1	NCBI	GCA_006410935.1	Redunca redunca	Bohar reedbuck	0.471605	intact
HLhydGig1	NCBI	GCA_013391785.1	Hydrodamalis gigas	Steller's sea cow	0.42963	putative loss	Likely a loss, as the splice site mutation in exon 6 is observed in manatee and dugong. But this and other parts of the CDS are missing in the Steller's sea cow assembly. The CDS is evolving under relaxed selection as all Sirenian branches.
HLaloPal1	NCBI	GCA_004027835.1	Alouatta palliata	mantled howler monkey	0.790123	intact
HLcalPym1	DNA Zoo Consortium	none	Callithrix pygmaea	pygmy marmoset	0.790123	intact
HLeleMax1	DNA Zoo Consortium	none	Elephas maximus	Asiatic elephant	0.807407	intact
HLeryPat1	NCBI	GCA_004027335.1	Erythrocebus patas	red guenon	0.790123	intact
HLeulMon1	DNA Zoo Consortium	none	Eulemur mongoz	mongoose lemur	0.728395	intact
HLneoPyg1	NCBI	GCA_006410875.1	Neotragus pygmaeus	royal antelope	0.582716	intact
HLsaiBol1	DNA Zoo Consortium	none	Saimiri boliviensis	Bolivian squirrel monkey	0.790123	intact
HLtheGel1	NCBI	GCF_003255815.1	Theropithecus gelada	gelada	0.790123	intact
mesAur1	NCBI	GCF_000349665.1	Mesocricetus auratus	golden hamster	0.780247	intact
ochPri3	NCBI	GCF_000292845.1	Ochotona princeps	American pika	0.780247	intact
HLphiMax1	NCBI	GCA_006410695.1	Philantomba maxwellii	Maxwell's duiker	0.424691	intact
HLtraKan1	NCBI	GCA_006408655.1	Tragulus kanchil	-	0.881481	intact
cavApe1	NCBI	GCA_000688575.1	Cavia aperea	Brazilian guinea pig	0.82716	intact
HLbalPhy1	NCBI	GCA_008795845.1	Balaenoptera physalus	Fin whale	0.82716	intact
HLcamBac1	NCBI	GCF_000767855.1	Camelus bactrianus	Bactrian camel	0.82716	intact
HLeidHel2	DNAZoo	none	Eidolon helvum	straw-colored fruit bat	0.780247	intact
HLkogBre1	NCBI	GCA_004363705.1	Kogia breviceps	pygmy sperm whale	0.587654	intact
HLlepTim1	NCBI	GCA_009760805.1	Lepus timidus	Mountain hare	0.82716	intact
HLloxAfr4	ftp://ftp.broadinstitute.org/pub/assemblies/mammals/elephant/loxAfr4/	none	Loxodonta africana	African savanna elephant	0.824691	intact
HLmarMar1	NCBI	GCF_001458135.1	Marmota marmota marmota	Alpine marmot	0.920988	intact
HLneoLep1	NCBI	GCA_001675575.1	Neotoma lepida	desert woodrat	0.82716	intact
HLrhoOpi1	NCBI	GCA_010120015.1	Rhombomys opimus	great gerbil	0.903704	intact
HLsemEnt1	NCBI	GCA_004025065.1	Semnopithecus entellus	Hanuman langur	0.807407	intact
HLursAme1	NCBI	GCA_003344425.1	Ursus americanus	American black bear	0.812346	intact
HLvulLag1	NCBI	GCA_004023825.1	Vulpes lagopus	Arctic fox	0.587654	intact
tupBel1	NCBI	GCA_000181375.1	Tupaia belangeri	northern tree shrew	0.753086	intact
ursMar1	NCBI	GCF_000687225.1	Ursus maritimus	polar bear	0.780247	intact
vicPac2	NCBI	GCF_000164845.1	Vicugna pacos	alpaca	0.82716	intact
HLantPal2	Bat1K	none	Antrozous pallidus	pallid bat	0.353086	lost
HLpipPip1	NCBI	GCA_004026625.1	Pipistrellus pipistrellus	common pipistrelle	0.116049	lost
HLparHer1	NCBI	GCA_004024585.1	Paradoxurus hermaphroditus	Asian palm civet	0.471605	intact
HLmonMon1	NCBI	GCF_005190385.1	Monodon monoceros	narwhal	0.567901	intact	SERPINE3 is intact in a different assembly of the same species (HLmonMon2, unpublished assembly, % intact 0,9901234567901235).
HLmusPut1	NCBI	GCA_902460205.1	Mustela putorius	European polecat	0.530864	intact	Frame shifting deletion is not confirmed by blast against sequencing reads (SRX041625, SRX041510-13, SRX034839-45) and represents a sequencing error.
HLodoVir3	NCBI	GCA_014726795.1	Odocoileus virginianus	white-tailed deer	0.466667	intact	SERPINE3 is intact in alternative assemblies of the same species (HLodoVir1, GCA_002102435.1, %intact 0,993432; HLodoVir2, DNAZoo, % intact 0,996369).
HLeonSpe1	NCBI	GCA_003508835.1	Eonycteris spelaea	lesser dawn bat	0.748148	intact	Frame shifting mutation is not confirmed in a different assembly of the same species (HLeonSpe2A, Bat1K, % intact 0,9901234567901235). The frame shift likely presents a sequencing error.
HLmegLyr2	NCBI	GCA_004026885.1	Megaderma lyra	Indian false vampire	0.797531	lost	Stopp codon is supported by blast against sequencing reads (SRX4562090) and by another assembly (megLyr3, Bat1K, %intact 0,7975308641975308).
HLrhiAff2	Bat1K	none	Rhinolophus affinis	intermediate horseshoe bat	0.745679	lost
HLrhiFer5	Bat1K published	none	Rhinolophus ferrumequinum	greater horseshoe bat	0.617284	lost
HLrhiLuc4	Bat1K	none	Rhinolophus luctus	Woolly horseshoe bat	0.634568	lost
HLrhiSin2	VGP	GCA_020740635.1	Rhinolophus sinicus	Chinese rufous horseshoe bat	0.31358	lost
HLrhiTri2	Bat1K	none	Rhinolophus trifoliatus	Trefoil horseshoe bat	0.654321	lost
HLvulVul1	NCBI	GCF_003160815.1	Vulpes vulpes	red fox	0.567901	intact	There is an N few bases after a putative frame shift (SRX2627132-36). The CDS evolves under intensified selection.
HLellLut1	NCBI	GCA_001685075.1	Ellobius lutescens	Transcaucasian mole vole	0.585185	putative loss	The frame shifting mutation in exon 2 was confirmed by blast against sequencing reads (SRX1739621-23, SRX1739627). This short deletion could alternatively lead to a GG splice site. Otherwise SERPINE3 is intact, but evolves under relaxed selection.
HLmadKir1	NCBI	GCA_006408675.1	Madoqua kirkii	Kirk's dik-dik	0.493827	intact	Frame shifting deletions are not confirmed by blast against sequencing reads (SRX3826288-91) and represent sequencing errors.
HLokaJoh2	DNA Zoo Consortium	none	Okapia johnstoni	okapi	0.782716	unclear	Downstream half of exon 1 is deleted, which is also supported by blast against sequencing reads (SRX1624618, SRX1624616, SRX3801682-87). We conservatively do not consider this is a gene loss, as there is only one mutation. The remaining CDS is not evolving under relaxed but intensified selection in comparison to other intact SERPINE3 genes.
HLrapCam1	NCBI	GCA_006410735.1	Raphicerus campestris	steenbok	0.780247	unclear	Exon 1 is deleted in the steenbok assembly. The remaining sequence is not evolving under relaxed selection.
triMan1	NCBI	GCF_000243295.1	Trichechus manatus latirostris	Florida manatee	0.666667	lost	Both splice site mutations are supported by blast against sequencing data (SRX091948, SRX081854, SRX081853). The SERPINE3 CDS is evolving under relaxed selection in all Sirenias in comparison to other intact SERPINE3 genes.
