# Supplementary material for: Vision-related convergent gene losses reveal SERPINE3’s unknown role in the eye
Source: eLife. 2022 Jun 21;11:e77999. doi: 10.7554/eLife.77999 (PMC9355568; doi:10.7554/eLife.77999)
Supplement: Figure 2—source data 2. [file elife-77999-fig2-data2.xls]

## Sheet: Figure 2 - Source data 2
Figure 2 - Source data 2: Verification of inactivating mutations in SERPINE3 with raw DNA sequencing reads
Inactivating mutations as determined by TOGA were verified by blast against DNA SRA data sets for those species where there is no independent support of a shared inactivating mutation by a different assembly or genome of a close relative. For each of those listed species, we verified at most three independent inactivating mutations. We list the number of blast hits that do or do not supportthe mu…
Genome assembly	SRA data set	Inactivating mutation	#Supporting blast hits	#Non-supporting blast hits	Classification of inactivating mutation
HLdugDug1	DRR251525	FS_exon3	63	0	confirmed
HLdugDug1	DRR251525	SS_acceptor_exon6	59	0	confirmed
HLellLut1	SRX1739621-23, SRX1739627	SS_exon2	51	0	confirmed
HLmadKir1	SRX3826288-91	FS_exon3	0	39	sequencing error
HLmadKir1	SRX3826288-91	FS_exon1	0	22	sequencing error
HLokaJoh2	SRX1624618, SRX1624616, SRX3801682-87	Stop_exon1	55	0	confirmed
HLvulVul1	SRX2627132-36	FS_exon3	7	0	region not covered well, one N following just few nt downstream
HLmusPut1	SRX041625, SRX041510-13, SRX034839-45	FS_exon3	0	26	sequencing error
HLmegLyr2	SRX4562090	Stop_exon5	34	0	confirmed
sorAra2	SRX041636	FS_exon2	22	0	confirmed
sorAra2	SRX041636	FS_exon2	31	0	confirmed
sorAra2	SRX041636	FS_exon4	27	0	confirmed
sorAra2	SRX041636	FS_exon4	21	0	confirmed
HLsolPar1	SRX2982248-SRX2982253	Stop_exon2	33	1	confirmed
HLsolPar1	SRX2982248-SRX2982253	FS_exon1	51	0	confirmed
HLsolPar1	SRX2982248-SRX2982253	FS_exon2	32	0	confirmed
HLsolPar1	SRX2982248-SRX2982253	FS_exon2	35	0	confirmed
HLcraTho1	SRX4501349	FS_exon1	26	0	confirmed
HLcraTho1	SRX4501349	FS_exon1	28	0	confirmed
HLcraTho1	SRX4501349	FS_exon1	24	0	confirmed
HLcraTho1	SRX4501349	Stop_exon3	42	0	confirmed
HLfukDam2	SRX341884-SRX341887, SRX341890-SRX341892	Stop_exon2	74	2	confirmed
HLfukDam2	SRX341884-SRX341887, SRX341890-SRX341892	FS_exon2	74	0	confirmed
HLfukDam2	SRX341884-SRX341887, SRX341890-SRX341892	Stop_exon4	71	2	confirmed
hetGla2	SRX171625, SRX047047, SRX047046	Stop_exon1	42	0	confirmed
hetGla2	SRX171625, SRX047047, SRX047046	FS_exon3	25	0	confirmed
hetGla2	SRX171625, SRX047047, SRX047046	Deletion_exon4	53	1	confirmed
nanGal1	SRX330807	FS_exon1	13	0	confirmed
nanGal1	SRX330807	FS_exon4	15	1	confirmed
nanGal1	SRX330807	FS_exon4	18	0	confirmed
nanGal1	SRX330807	FS_exon7	23	0	confirmed
