# Supplementary material for: Vision-related convergent gene losses reveal SERPINE3’s unknown role in the eye
Source: eLife. 2022 Jun 21;11:e77999. doi: 10.7554/eLife.77999 (PMC9355568; doi:10.7554/eLife.77999)
Supplement: Figure 2—source data 3. [file elife-77999-fig2-data3.xls]

## Sheet: Figure 2 - Source data 3
Figure 2 - Source data 3: Expression of SERPINE3 remnants in public RNA-seq datasets
The table lists the number of RNA-seq reads that have significant blast hits with at least 95% identity to the remnants of SERPINE3 in species that have lost this gene.
Since eye RNA-seq data only exists for several bat species, we analyzed brain RNA-seq data for other species.
For SERPINE3, we also computed the number of RNA-seq reads, after excluding exon 8, which overlaps the 3'UTR of the neighboring INTS6 genes, which is located on the other strand.
For comparison, the number of reads aligning to GLUL, which is known to be expressed in eye and brain and that is intact in these species, are shown.
			Number of RNA-seq reads with blast hits to
Species	Tissue	SRA identifier	SERPINE3 remnants	SERPINE3 remnants excluding exon 8	GLUL ENST00000331872
Tadarida brasiliensis	eye	SRX6461510	4	1	37291
Molossus molossus	eye	SRX6461509	9	1	17220
Myotis nigricans	eye	SRX6461507	3	2	33882
Noctilio leporinus	eye	SRX6461505	4	1	29673
Carollia perspicillata	eye	SRX6461501	1	0	41139
Desmodus rotundus	eye	SRX6461483	3	0	30224
Rhinolophus clivosus	eye	SRX6461494	10	9	9832
Heterocephalus glaber	cerrebellum	SRR2123686	6	0	5352
Heterocephalus glaber	cerrebellum	SRR2123685	9	1	5391
Heterocephalus glaber	hypothalamus	SRR2120779	2	1	5711
Heterocephalus glaber	hypothalamus	SRR2120811	7	1	5865
Heterocephalus glaber	brain	SRR306401	1	1	5851
Heterocephalus glaber	brain	SRR306400	5	0	4677
Heterocephalus glaber	brain	SRR306402	3	0	3674
Nannospalax ehrenbergi	brain	SRR5039066	2	2	6248
Nannospalax ehrenbergi	brain	SRR5039061	5	1	8176
Nannospalax ehrenbergi	brain	SRR5039059	6	3	6785
Nannospalax ehrenbergi	brain	SRR5039065	7	6	8091
Nannospalax ehrenbergi	brain	SRR5039063	7	6	6957
Nannospalax ehrenbergi	brain	SRR5039064	6	4	8811
Fukomys damarensis	brain	SRR975615	6	3	24230
Fukomys damarensis	brain	SRR975614	4	1	11269
Fukomys damarensis	brain	SRR975610	8	2	12995
Fukomys damarensis	brain	SRR975607	3	1	12235
Fukomys damarensis	brain	SRR975612	8	0	3568
Fukomys damarensis	brain	SRR975617	6	1	6410
Dasypus novemcinctus	cerrebellum	SRR12442719	3	0	12037
Dasypus novemcinctus	brain	SRR12442720	3	0	24439
Dasypus novemcinctus	cerrebellum	SRR12442729	1	0	10485
Dasypus novemcinctus	brain	SRR12442730	1	0	5013
