# Supplementary material for: Vision-related convergent gene losses reveal SERPINE3’s unknown role in the eye
Source: eLife. 2022 Jun 21;11:e77999. doi: 10.7554/eLife.77999 (PMC9355568; doi:10.7554/eLife.77999)
Supplement: Figure 2—source data 4. [file elife-77999-fig2-data4.xls]

## Sheet: Figure 2 - Source data 4
Figure 2 - Source data 4: Analysis of relaxation or intensification of selection in SERPINE3 branches of interest
The applied model allows for three proportions of sites (percentage 1-3), that each evolve under a different selection pressure (omega 1-3). Lineages with a significant change in the selection intensity parameter (k) are shown in italics, whereby bold indicates relaxation (k<1) and non-bold intensification (k>1).
The phylogenetic tree (newick format) of placental mammals that used for the selection analysis is: ((((((((((((((((HLacoRus1,HLacoCah1)HLacoRus1-HLacoCah1,(HLpsaObe1,(HLmerUng1,HLrhoOpi1)HLmerUng1-HLrhoOpi1)HLpsaObe1-HLmerUng1)HLacoRus1-HLpsaObe1,(((HLarvNil1,HLgraSur1)HLarvNil1-HLgraSur1,(HLapoSyl1,(HLmasCou1,(HLmusPah1,(HLmusCar1,((HLmusSpr1,HLmusSpi1)HLmusSpr1-HLmusSpi1,(mm10,mm39)mm10-mm39)H…
For each individual analysis, the tree was pruned to contain only the 327 species for which SERPINE3 was intact and complete plus the species or clade of interest.
Species in foreground	Species in background	P-value	selection intensity parameter k	Omega 1	Omega 2	Omega 3	Percentage 1	Percentage 2	Percentage 3
Steenbok	327 intact, complete SERPINE3 + Dik dik	0.598861	1.2006	0	0.316125	6.36946	0.159597	0.82157	0.018833
Sirenias (Manatee, Steller's sea cow, dugong, ancestral branches of Sirenias and Dugongidae)	327 intact, complete SERPINE3 + African elephant + Asian elephant	0.000258189	0.276852	0.351205	0.731744	1.69474	0.180719	0.800831	0.01845
Mole vole	327 intact, complete SERPINE3	0.00842476	0	1	1	1	0.193638	0.787239	0.0191232
European Hedhehog	327 intact, complete SERPINE3	0.0891	0.712526	0.00566597	0.345073	6.7456	0.227748	0.753709	0.0185428
Elephants (African elephant, Asian elephant, their ancestor)	327 intact, complete SERPINE3	0.2054	0.678641	0	0.346364	7.28532	0.207789	0.775824	0.0163865
Sac-winged bat (intact copy)	327 intact, complete SERPINE3	0.0474534	0.506935	0	0.633569	2.82635	0.309356	0.676207	0.0144375
Okapi	327 intact, complete SERPINE3	1.06169e-08	5.39507	0.000251381	0.000480968	4040.88	0.121975	0.845322	0.0327027
Fox	327 intact, complete SERPINE3	0.043591	1.85429	0	0.13734	44.773	0.189938	0.795141	0.0149208
