# Supplementary material for: Vision-related convergent gene losses reveal SERPINE3’s unknown role in the eye
Source: eLife. 2022 Jun 21;11:e77999. doi: 10.7554/eLife.77999 (PMC9355568; doi:10.7554/eLife.77999)
Supplement: Figure 3—source data 1. [file elife-77999-fig3-data1.xls]

## Sheet: Figure 3 - Source data 1
Figure 3 - Source data 1: qPCR analysis of a zebrafish organ series using the normalizer gene actb
Raw values, summary statistics and test statistics are provided
Two samples (marked in bold) represent extreme outliers and were excluded from Figure 3 and for statistical testing.
A qPCR normalized ratio					B Summary statistics
Biological.Replicate	Tissue	Normalized.Ratio	Mean.Normalized.Ratio of each biological replicate		Summary Statistics	Min.	1st Qu.	Median	Mean	3rd Qu.	Max.
Replicate1	Brain	0.0014199	0.00174014		eye with outlier	0.00387	0.004715	0.005282	0.010732	0.006066	0.049527
Replicate1	Brain	0.00173602	0.00174014		eye without outlier	0.00387	0.004679	0.005227	0.00519	0.005599	0.00668
Replicate1	Brain	0.00206449	0.00174014		intestine	0.000192	0.000311	0.0003546	0.0004047	0.0004497	0.0007645
Replicate1	Eye	0.00536081	0.00522731		brain	0.0003088	0.0009635	0.001363	0.0015134	0.0018117	0.0034545
Replicate1	Eye	0.00521422	0.00522731		testis	0.0001062	0.0001342	0.0003513	0.0003054	0.0003917	0.0005445
Replicate1	Eye	0.00510691	0.00522731		liver with outlier	9.721e-05	0.000192	0.0002482	0.0004018	0.0003194	0.001595
Replicate1	Heart	0.00763406	0.00375083		liver without outlier	9.721e-05	0.0001774	0.0002116	0.0002313	0.0002941	0.0003675
Replicate1	Heart	0.00339274	0.00375083		heart	0.0002703	0.000379	0.0008191	0.0011389	0.0013364	0.0037508
Replicate1	Heart	0.000225696	0.00375083		C Test statistics
Replicate1	Testis	0.000167139	0.000114091		Welch two sample t-test	p-value	95% confidence interval low	95% confidence interval up	Cohen's d effect size
Replicate1	Testis	5.36275e-05	0.000114091		eye vs. brain	3.865e-06	-0.00471613	-0.00263772	3.94831
Replicate1	Testis	0.000121508	0.000114091		eye vs. heart	3.72e-06	-0.00519476	-0.00290812	3.9028
Replicate1	Liver	0.000185881	0.000148131		eye vs. intestine	5.525e-06	-0.00562842	-0.00394288	7.56949
Replicate1	Liver	0.00011764	0.000148131		eye vs. liver	6.049e-06	-0.00580087	-0.00411721	7.66625
Replicate1	Liver	0.000140871	0.000148131		eye vs. testis	5.172e-06	-0.00572745	-0.00404239	7.75049
Replicate1	Intestine	0.000571352	0.000559922
Replicate1	Intestine	0.000575326	0.000559922
Replicate1	Intestine	0.00053309	0.000559922
Replicate2	Brain	0.00118848	0.00147507
Replicate2	Brain	0.00157912	0.00147507
Replicate2	Brain	0.00165763	0.00147507
Replicate2	Eye	0.0050366	0.00475211
Replicate2	Eye	0.0041481	0.00475211
Replicate2	Eye	0.00507163	0.00475211
Replicate2	Heart	0.00123609	0.00132183
Replicate2	Heart	0.00127968	0.00132183
Replicate2	Heart	0.00144973	0.00132183
Replicate2	Intestine	0.000209127	0.000276698
Replicate2	Intestine	0.00030618	0.000276698
Replicate2	Intestine	0.000314788	0.000276698
Replicate2	Liver	0.000480448	0.000303372
Replicate2	Liver	0.00030618	0.000303372
Replicate2	Liver	0.000123489	0.000303372
Replicate2	Testis	0.000220032	0.000469498
Replicate2	Testis	0.000657829	0.000469498
Replicate2	Testis	0.000530632	0.000469498
Replicate3	Brain	0.000775098	0.00100112
Replicate3	Brain	0.00119123	0.00100112
Replicate3	Brain	0.00103703	0.00100112
Replicate3	Eye	0.00583925	0.00533629
Replicate3	Eye	0.00464534	0.00533629
Replicate3	Eye	0.00552427	0.00533629
Replicate3	Heart	0.000425074	0.000382881
Replicate3	Heart	0.000280444	0.000382881
Replicate3	Heart	0.000443125	0.000382881
Replicate3	Intestine	0.000336602	0.000370867
Replicate3	Intestine	0.000389344	0.000370867
Replicate3	Intestine	0.000386655	0.000370867
Replicate3	Liver	0.000352522	0.000367497
Replicate3	Liver	0.000294387	0.000367497
Replicate3	Liver	0.000455583	0.000367497
Replicate3	Testis	0.000151682	0.000140856
Replicate3	Testis	6.51143e-05	0.000140856
Replicate3	Testis	0.000205772	0.000140856
Replicate4	Brain	0.000884204	0.000850561
Replicate4	Brain	0.000819293	0.000850561
Replicate4	Brain	0.000848185	0.000850561
Replicate4	Eye	0.00384358	0.00387038
Replicate4	Eye	0.00389724	0.00387038
Replicate4	Eye	0.00387032	0.00387038
Replicate4	Heart	0.000218008	0.000270268
Replicate4	Heart	0.000382214	0.000270268
Replicate4	Heart	0.000210582	0.000270268
Replicate4	Intestine	0.000454531	0.000412899
Replicate4	Intestine	0.000430013	0.000412899
Replicate4	Intestine	0.000354155	0.000412899
Replicate4	Liver	9.8013e-05	9.72066e-05
Replicate4	Liver	7.12541e-05	9.72066e-05
Replicate4	Liver	0.000122353	9.72066e-05
Replicate4	Testis	9.7336e-05	0.000106218
Replicate4	Testis	0.00011181	0.000106218
Replicate4	Testis	0.000109509	0.000106218
Replicate5	Brain	0.00223321	0.00202636
Replicate5	Brain	0.0017766	0.00202636
Replicate5	Brain	0.00206926	0.00202636
Replicate5	Eye	0.0400145	0.0495272
Replicate5	Eye	0.0606506	0.0495272
Replicate5	Eye	0.0479165	0.0495272
Replicate5	Liver	8.87434e-05	0.00159538
Replicate5	Liver	0.0016538	0.00159538
Replicate5	Liver	0.00304361	0.00159538
Replicate5	Heart	0.000967579	0.000805842
Replicate5	Heart	0.000559593	0.000805842
Replicate5	Heart	0.000890354	0.000805842
Replicate5	Intestine	0.000346066	0.000338392
Replicate5	Intestine	0.000376082	0.000338392
Replicate5	Intestine	0.000293029	0.000338392
Replicate5	Testis	0.000356618	0.000360029
Replicate5	Testis	0.000351708	0.000360029
Replicate5	Testis	0.000371762	0.000360029
Replicate6	Brain	0.000388446	0.000308833
Replicate6	Brain	0.000270891	0.000308833
Replicate6	Brain	0.000267162	0.000308833
Replicate6	Eye	0.00628734	0.00586147
Replicate6	Eye	0.00551152	0.00586147
Replicate6	Eye	0.00578554	0.00586147
Replicate6	Heart	0.000423114	0.000367231
Replicate6	Heart	0.000164838	0.000367231
Replicate6	Heart	0.000513743	0.000367231
Replicate6	Intestine	0.000422137	0.000322414
Replicate6	Intestine	0.00013451	0.000322414
Replicate6	Intestine	0.000410594	0.000322414
Replicate6	Liver	0.000245271	0.000206623
Replicate6	Liver	0.000215006	0.000206623
Replicate6	Liver	0.000159591	0.000206623
Replicate6	Testis	0.000616619	0.000544466
Replicate6	Testis	0.000421163	0.000544466
Replicate6	Testis	0.000595615	0.000544466
Replicate7	Brain	0.00137153	0.00125088
Replicate7	Brain	0.00129754	0.00125088
Replicate7	Brain	0.00108356	0.00125088
Replicate7	Eye	0.00443556	0.00460505
Replicate7	Eye	0.00509512	0.00460505
Replicate7	Eye	0.00428447	0.00460505
Replicate7	Heart	0.000632491	0.000832304
Replicate7	Heart	0.000659351	0.000832304
Replicate7	Heart	0.00120507	0.000832304
Replicate7	Intestine	0.00019648	0.000191991
Replicate7	Intestine	0.000233655	0.000191991
Replicate7	Intestine	0.000145839	0.000191991
Replicate7	Liver	0.000171045	0.000284811
Replicate7	Liver	0.000225696	0.000284811
Replicate7	Liver	0.000457693	0.000284811
Replicate7	Testis	0.000392052	0.000342602
Replicate7	Testis	0.000373484	0.000342602
Replicate7	Testis	0.000262269	0.000342602
Replicate8	Brain	0.00411945	0.0034545
Replicate8	Brain	0.00310039	0.0034545
Replicate8	Brain	0.00314367	0.0034545
Replicate8	Eye	0.00655434	0.00667988
Replicate8	Eye	0.00697625	0.00667988
Replicate8	Eye	0.00650907	0.00667988
Replicate8	Heart	0.000967579	0.00138013
Replicate8	Heart	0.00175619	0.00138013
Replicate8	Heart	0.00141662	0.00138013
Replicate8	Intestine	0.00071159	0.000764472
Replicate8	Intestine	0.000913273	0.000764472
Replicate8	Intestine	0.000668555	0.000764472
Replicate8	Liver	0.000182899	0.000211599
Replicate8	Liver	0.000180381	0.000211599
Replicate8	Liver	0.000271518	0.000211599
Replicate8	Testis	0.000318445	0.000365736
Replicate8	Testis	0.000383984	0.000365736
Replicate8	Testis	0.000394779	0.000365736
