# Supplementary material for: Vision-related convergent gene losses reveal SERPINE3’s unknown role in the eye
Source: eLife. 2022 Jun 21;11:e77999. doi: 10.7554/eLife.77999 (PMC9355568; doi:10.7554/eLife.77999)
Supplement: Figure 3—source data 2. [file elife-77999-fig3-data2.xls]

## Sheet: Figure 3 - Source data 2
Figure 3 - Source data 2: qPCR analysis of a zebrafish organ series using the normalizer gene rpl13a
Raw values, summary statistics and test statistics are provided
Values below the detection limit during qPCR amplification are shown as NA and were treated as 0 for calulation of the mean of the normalized expressio ratio for each biological replicate.
A qPCR normalized ratio					B Summary statistics
Biological.Replicate	Condition.Name	Normalized.Ratio	Mean.Normalized.Ratio of each biological replicate		Summary Statistics	Min.	1st Qu.	Median	Mean	3rd Qu.	Max.
Replicate1	brain	2.898	3.178		brain	3.178	4.652	6.125	6.541	8.222	10.319
Replicate1	brain	3.656	3.178		eye	9.989	10.259	10.53	13.783	15.681	20.832
Replicate1	brain	2.98	3.178		heart	0.533	0.581	0.63	0.708	0.795	0.96
Replicate1	eye	10.51	10.53		intestine	0.244	0.263	0.282	0.293	0.318	0.353
Replicate1	eye	10.63	10.53		liver	0.049	0.067	0.085	0.111	0.142	0.198
Replicate1	eye	10.45	10.53		testis	0.548	0.713	0.878	0.835	0.979	1.08
Replicate1	heart	0.4807	0.532567
Replicate1	heart	0.5801	0.532567		Welch two sample t-test	p-value	95% confidence interval low	95% confidence interval up	Cohen's d effect size
Replicate1	heart	0.5369	0.532567		eye vs. brain	0.1681	-5.26156	19.747	1.44553
Replicate1	intestine	0.2569	0.243667		eye vs. heart	0.0655	-2.07344	28.2251	3.02449
Replicate1	intestine	0.317	0.243667		eye vs. intestine	0.06207	-1.68595	28.6666	3.12233
Replicate1	intestine	0.1571	0.243667		eye vs. liver	0.06056	-1.50194	28.8472	3.16439
Replicate1	liver	0.04644	0.0847767		eye vs. testis	0.06659	-2.18875	28.0853	2.99412
Replicate1	liver	0.1298	0.0847767
Replicate1	liver	0.07809	0.0847767
Replicate1	testis	0.6088	0.5482
Replicate1	testis	0.437	0.5482
Replicate1	testis	0.5988	0.5482
Replicate2	brain	8.39	6.12517
Replicate2	brain	7.194	6.12517
Replicate2	brain	7.462	6.12517
Replicate2	brain	5.688	6.12517
Replicate2	brain	4.268	6.12517
Replicate2	brain	3.749	6.12517
Replicate2	eye	12.69	9.9885
Replicate2	eye	10.49	9.9885
Replicate2	eye	12.69	9.9885
Replicate2	eye	8.753	9.9885
Replicate2	eye	8.321	9.9885
Replicate2	eye	6.987	9.9885
Replicate2	heart	0.6237	0.629967
Replicate2	heart	0.8001	0.629967
Replicate2	heart	0.6517	0.629967
Replicate2	heart	0.6088	0.629967
Replicate2	heart	0.5755	0.629967
Replicate2	heart	0.52	0.629967
Replicate2	intestine	0.2858	0.2824
Replicate2	intestine	0.1533	0.2824
Replicate2	intestine	0.2523	0.2824
Replicate2	intestine	0.4257	0.2824
Replicate2	intestine	0.3495	0.2824
Replicate2	intestine	0.2278	0.2824
Replicate2	liver	0.03562	0.0490933
Replicate2	liver	0.04277	0.0490933
Replicate2	liver	0.09857	0.0490933
Replicate2	liver	NA	0.0490933
Replicate2	liver	NA	0.0490933
Replicate2	liver	0.1176	0.0490933
Replicate2	testis	1.485	1.07877
Replicate2	testis	1.529	1.07877
Replicate2	testis	1.411	1.07877
Replicate2	testis	NA	1.07877
Replicate2	testis	1.516	1.07877
Replicate2	testis	0.5316	1.07877
Replicate3	brain	10.37	10.3188
Replicate3	brain	9.842	10.3188
Replicate3	brain	11.05	10.3188
Replicate3	brain	11.05	10.3188
Replicate3	brain	9.282	10.3188
Replicate3	eye	18.92	20.8317
Replicate3	eye	18.38	20.8317
Replicate3	eye	18.49	20.8317
Replicate3	eye	27.8	20.8317
Replicate3	eye	21.54	20.8317
Replicate3	eye	19.86	20.8317
Replicate3	heart	0.6351	0.96015
Replicate3	heart	1.39	0.96015
Replicate3	heart	0.9101	0.96015
Replicate3	heart	1.108	0.96015
Replicate3	heart	0.8749	0.96015
Replicate3	heart	0.8428	0.96015
Replicate3	intestine	0.2998	0.3531
Replicate3	intestine	0.4125	0.3531
Replicate3	intestine	0.3104	0.3531
Replicate3	intestine	0.7435	0.3531
Replicate3	intestine	0.2263	0.3531
Replicate3	intestine	0.1261	0.3531
Replicate3	liver	0.1206	0.198467
Replicate3	liver	0.1435	0.198467
Replicate3	liver	0.1941	0.198467
Replicate3	liver	NA	0.198467
Replicate3	liver	0.4416	0.198467
Replicate3	liver	0.291	0.198467
Replicate3	testis	0.798	0.878433
Replicate3	testis	0.7934	0.878433
Replicate3	testis	0.9388	0.878433
Replicate3	testis	0.973	0.878433
Replicate3	testis	0.903	0.878433
Replicate3	testis	0.8644	0.878433
