# Supplementary material for: Vision-related convergent gene losses reveal SERPINE3’s unknown role in the eye
Source: eLife. 2022 Jun 21;11:e77999. doi: 10.7554/eLife.77999 (PMC9355568; doi:10.7554/eLife.77999)
Supplement: Figure 3—source data 3. [file elife-77999-fig3-data3.xls]

## Sheet: Figure 3 - Source data 3
Figure 3 - Source data 3: qPCR analysis of zebrafish eye subtissues
Raw values, summary statistics and test statistics are provided
A qPCR normalized ratio					B Summary statistics
Biological.Replicate	Subtissue	Normalized.Ratio	Mean.Normalized.Ratio of each biological replicate		Summary Statistics	Min.	1st Qu.	Median	Mean	3rd Qu.	Max.
Replicate1	Eye	0.00141	0.00179		retina	0.03373	0.03506	0.03639	0.0388	0.04134	0.04628
Replicate1	Eye	0.00136	0.00179		RPE	0.003613	0.003953	0.004293	0.004613	0.005113	0.005933
Replicate1	Eye	0.0026	0.00179		eye	0.0003833	0.0004433	0.0005033	0.0008922	0.0011467	0.00179
Replicate1	Retina	0.04289	0.04628		RPE/retina	0.01154	0.0221	0.03266	0.0293	0.03818	0.04369
Replicate1	Retina	0.04565	0.04628		eye
Replicate1	Retina	0.0503	0.04628		C Test statistics
Replicate1	Retina/RPE	0.04359	0.0436867		Welch two sample t-test	p-value	95% confidence interval low	95% confidence interval up	Cohen's d effect size
Replicate1	Retina/RPE	0.04328	0.0436867		retina vs. RPE	0.01036	0.0234203	0.0449574	7.19733
Replicate1	Retina/RPE	0.04419	0.0436867		retina vs. eye	0.009238	0.0272391	0.0485809	8.05367
Replicate1	RPE	0.00422	0.00429333		retina vs. RPE/retina	0.4275	-0.0187433	0.0377544	0.762816
Replicate1	RPE	0.00282	0.00429333		RPE vs. eye	0.01493	0.00143693	0.00600529	3.69306
Replicate1	RPE	0.00584	0.00429333		RPE vs. RPE/retina	0.1195	-0.0509387	0.00157208	-2.13122
Replicate2	Eye	0.00023	0.000383333		eye vs. RPE/retina	0.09449	-0.05462	-0.00218891	-2.45624
Replicate2	Eye	0.00047	0.000383333
Replicate2	Eye	0.00045	0.000383333
Replicate2	Retina	0.0359	0.0363933
Replicate2	Retina	0.03955	0.0363933
Replicate2	Retina	0.03373	0.0363933
Replicate2	Retina/RPE	0.03373	0.0326633
Replicate2	Retina/RPE	0.03213	0.0326633
Replicate2	Retina/RPE	0.03213	0.0326633
Replicate2	RPE	0.00575	0.00593333
Replicate2	RPE	0.0054	0.00593333
Replicate2	RPE	0.00665	0.00593333
Replicate3	Eye	0.00027	0.000503333
Replicate3	Eye	0.00068	0.000503333
Replicate3	Eye	0.00056	0.000503333
Replicate3	Retina	0.03303	0.0337333
Replicate3	Retina	0.03901	0.0337333
Replicate3	Retina	0.02916	0.0337333
Replicate3	Retina/RPE	0.00895	0.01154
Replicate3	Retina/RPE	0.01181	0.01154
Replicate3	Retina/RPE	0.01386	0.01154
Replicate3	RPE	0.00416	0.00361333
Replicate3	RPE	0.00436	0.00361333
Replicate3	RPE	0.00232	0.00361333
