# Supplementary material for: Vision-related convergent gene losses reveal SERPINE3’s unknown role in the eye
Source: eLife. 2022 Jun 21;11:e77999. doi: 10.7554/eLife.77999 (PMC9355568; doi:10.7554/eLife.77999)
Supplement: Figure 3—source data 4. [file elife-77999-fig3-data4.xls]

## Sheet: Figure 3 - Source data 4
Figure 3 - Source data 4: qPCR analysis of mouse organs
Values below the detection limit during qPCR amplification are shown as NA. A mean for the biological replicate was computed if a value was available for more than half of the technical replicates.
A qPCR normalized ratio						B Summary statistics
Biological.Replicate	Condition.Name	Normalized.Ratio	Mean.Normalized.Ratio			Summary Statistics	Min.	1st Qu.	Median	Mean	3rd Qu.	Max.
Replicate1	Colon	NA	NA			eye	0.4047	0.7083	10.119	17.121	23.658	37.197
Replicate1	Colon	NA	NA			non-eye	0	0	0	0.002001	0.001467	0.016583
Replicate1	Colon	NA	NA
Replicate1	Colon	0.00171	NA
Replicate1	Cortex	NA	NA
Replicate1	Cortex	0.002327	NA
Replicate1	Cortex	0.004094	NA
Replicate1	Cortex	NA	NA
Replicate1	Eye	0.4234	0.40475
Replicate1	Eye	0.3662	0.40475
Replicate1	Eye	0.3802	0.40475
Replicate1	Eye	0.4492	0.40475
Replicate1	Heart	NA	NA
Replicate1	Heart	NA	NA
Replicate1	Heart	NA	NA
Replicate1	Heart	NA	NA
Replicate1	Liver	NA	NA
Replicate1	Liver	NA	NA
Replicate1	Liver	NA	NA
Replicate1	Liver	NA	NA
Replicate1	Spleen	0.001663	NA
Replicate1	Spleen	NA	NA
Replicate1	Spleen	NA	NA
Replicate1	Spleen	0.002543	NA
Replicate1	Testis	NA	0.004326
Replicate1	Testis	0.005039	0.004326
Replicate1	Testis	0.006116	0.004326
Replicate1	Testis	0.006149	0.004326
Replicate2	Colon	NA	NA
Replicate2	Colon	NA	NA
Replicate2	Colon	NA	NA
Replicate2	Colon	NA	NA
Replicate2	Cortex	NA	NA
Replicate2	Cortex	NA	NA
Replicate2	Cortex	NA	NA
Replicate2	Cortex	NA	NA
Replicate2	Eye	1.482	1.0119
Replicate2	Eye	0.7025	1.0119
Replicate2	Eye	1.215	1.0119
Replicate2	Eye	0.6481	1.0119
Replicate2	Heart	NA	NA
Replicate2	Heart	NA	NA
Replicate2	Heart	NA	NA
Replicate2	Heart	NA	NA
Replicate2	Liver	NA	NA
Replicate2	Liver	NA	NA
Replicate2	Liver	NA	NA
Replicate2	Liver	NA	NA
Replicate2	Spleen	NA	NA
Replicate2	Spleen	NA	NA
Replicate2	Spleen	NA	NA
Replicate2	Spleen	0.008687	NA
Replicate2	Testis	0.0138	NA
Replicate2	Testis	0.02559	NA
Replicate2	Testis	NA	NA
Replicate2	Testis	NA	NA
Replicate3	Colon	NA	NA
Replicate3	Colon	NA	NA
Replicate3	Colon	NA	NA
Replicate3	Colon	NA	NA
Replicate3	Cortex	NA	NA
Replicate3	Cortex	NA	NA
Replicate3	Cortex	NA	NA
Replicate3	Cortex	NA	NA
Replicate3	Eye	4.09	3.71975
Replicate3	Eye	3.824	3.71975
Replicate3	Eye	3.677	3.71975
Replicate3	Eye	3.288	3.71975
Replicate3	Heart	NA	NA
Replicate3	Heart	NA	NA
Replicate3	Heart	NA	NA
Replicate3	Heart	NA	NA
Replicate3	Liver	NA	NA
Replicate3	Liver	NA	NA
Replicate3	Liver	NA	NA
Replicate3	Spleen	NA	NA
Replicate3	Spleen	NA	NA
Replicate3	Spleen	NA	NA
Replicate3	Spleen	NA	NA
Replicate3	Testis	NA	0.0165825
Replicate3	Testis	0.0306	0.0165825
Replicate3	Testis	0.02103	0.0165825
Replicate3	Testis	0.0147	0.0165825
