# Supplementary material for: Vision-related convergent gene losses reveal SERPINE3’s unknown role in the eye
Source: eLife. 2022 Jun 21;11:e77999. doi: 10.7554/eLife.77999 (PMC9355568; doi:10.7554/eLife.77999)
Supplement: Figure 3—source data 5. [file elife-77999-fig3-data5.xls]

## Sheet: Figure 3 - Source data 5
Figure 3 - Source data 5: Data sets supporting expression of SERPINE3 in tissues of the eye in vertebrates other than mouse and zebrafish
Data sets in italics support highest expression in eye in comparison to other organs/tissues, whereas the other data set had no information about relative expression in other organs/tissues.
Data set	Species	Tissue	Data source	Comment
GEO profiles: GDS3701	Rat	retina	PMID: 19103603	highest expression in retina across retina, pineal gland, cerebellum, cortex, hypothalamus, liver, heart
GEO profiles: GDS3846	Rat	retina	PMID: 21379381
GEO profiles: GDS4615	Rat	retina	PMID: 22039463
GEO profiles: GDS3374	Rat	retina	PMID: 18552980
Bgee	Cat	eyeball of camera-type eye	PMID: 33037820
GEO profiles: GDS3924	Chicken	combined retina + RPE	PMID: 21642623
GEO profiles: GDS2964	Chicken	RPE in development (E7-E18)	PMID: 17679949
Bgee	Cow	pigment epithelium of eye	PMID: 33037820
FantomCat	Human	RPE, retina	PMID: 27402679	enriched in ontology terms retina, RPE and layer of retina (744 Cage-seq sampels from different data sources reanalysed)
scRNA-Seq	Human	RPE	PMID: 31712411	differentially expressed in RPE in comparison to all other choroid tissues
Ocular Tissue Database	Human	all eye subtissues	PMID: 23500522
EyeIntegration	Human	RPE fetal tissue	PMID: 30239781	highest expression in fetal RPE across all healthy tissues
					Publication
