# Supplementary material for: Vision-related convergent gene losses reveal SERPINE3’s unknown role in the eye
Source: eLife. 2022 Jun 21;11:e77999. doi: 10.7554/eLife.77999 (PMC9355568; doi:10.7554/eLife.77999)
Supplement: Figure 4—source data 1. [file elife-77999-fig4-data1.xls]

## Sheet: Figure 4 - Source data 1
Figure 4 - Source data 1: qPCR analysis of zebrafish serpine3 cbg17 homozygotes (KO) vs. WT
Raw values, summary statistics and test statistics are provided.
Values below the detection limit during qPCR amplification are shown as NA and were treated as 0 for calulation of the mean of the normalized expressio ratio for each biological replicate.
A qPCR normalized ratio					B Summary statistics
Biological.Replicate	Genotype	Ratio	Mean.Normalized.Ratio		Summary Statistics	Min.	1st Qu.	Median	Mean	3rd Qu.	Max.
Replicate1	KO	0.0002976	0.000153697		WT	0.05565	0.07359	0.09152	0.09191	0.11005	0.12857
Replicate1	KO	6.916e-05	0.000153697		KO	6.806e-05	0.0001109	0.0001537	0.0001337	0.0001666	0.0001794
Replicate1	KO	9.433e-05	0.000153697
Replicate1	WT	0.05429	0.0556533		C Test statistics
Replicate1	WT	0.05429	0.0556533		Welch two sample t-test	p-value	95% confidence interval low	95% confidence interval up	Cohen's d effect size
Replicate1	WT	0.05838	0.0556533		WT vs. KO	0.04878	-0.182348	-0.00121375	3.56017
Replicate2	KO	3.728e-05	6.806e-05
Replicate2	KO	NA	6.806e-05
Replicate2	KO	0.0001669	6.806e-05
Replicate2	WT	0.09473	0.0915233
Replicate2	WT	0.08636	0.0915233
Replicate2	WT	0.09348	0.0915233
Replicate3	KO	0.0002444	0.000179433
Replicate3	KO	0.0001182	0.000179433
Replicate3	KO	0.0001757	0.000179433
Replicate3	WT	0.1213	0.128567
Replicate3	WT	0.1213	0.128567
Replicate3	WT	0.1431	0.128567
