# Supplementary material for: Vision-related convergent gene losses reveal SERPINE3’s unknown role in the eye
Source: eLife. 2022 Jun 21;11:e77999. doi: 10.7554/eLife.77999 (PMC9355568; doi:10.7554/eLife.77999)
Supplement: Figure 4—source data 2. [file elife-77999-fig4-data2.xls]

## Sheet: Figure 4 - Source data 2
Figure 4 - Source data 2: Macroscopic eye phenotype in serpine3 knockout lines
B summarizes phenotypic information of the individual fish for serpine3 cbg17 (pink) and serpine3 cbg 18 (blue).
A Significance test								B Summary statistics (eyes treated independently)
Feature	Allele	H0	Test	p-value	Significance level	Cohen's d effect size (KO vs. WT)		Iris solidity	Min.	1st Qu.	Median	Mean	3rd Qu.	Max.
Iris Solidity	serpine3 cbg17	Feature is not different between KO and WT siblings	Wilcoxon Rank Sum Test	0.01445	*	-1.07193		serpine3 cbg17	0.934	0.978	0.9915	0.9824	0.994	0.997
Iris Solidity, eyes treated independently	serpine3 cbg17			0.009864	**	-1.03165		WT cbg17	0.992	0.994	0.9955	0.9953	0.9962	0.998
Iris Solidity	serpine3 cbg18			5.704e-06	***	-1.49878		serpine3 cbg18	0.948	0.9768	0.988	0.9843	0.992	0.997
Iris Solidity, eyes treated independently	serpine3 cbg18			6.345e-09	***	-1.04285		WT cbg18	0.955	0.994	0.9955	0.9938	0.996	0.998
Iris Circularity	serpine3 cbg17	Feature is not different between KO and WT siblings	Wilcoxon Rank Sum Test	0.1243		-1.1844		Iris circularity	Min.	1st Qu.	Median	Mean	3rd Qu.	Max.
Iris Circularity, eyes treated independently	serpine3 cbg17			0.03713	*	-0.979849		serpine3 cbg17	0.742	0.8528	0.8825	0.8633	0.8885	0.896
Iris Circularity	serpine3 cbg18			0.0009173	***	-0.6854		WT cbg17	0.865	0.8828	0.893	0.8931	0.906	0.911
Iris Circularity, eyes treated independently	serpine3 cbg18			1.644e-05	***	-0.903461		serpine3 cbg18	0.813	0.858	0.875	0.8701	0.8872	0.909
								WT cbg18	0.755	0.886	0.892	0.8875	0.895	0.921
C Phenotypic information
Genotype	Individual	Eye	Indent present	Location of indent anterior-posterior	Location of indent ventral-dorsal	Iris circularity	Iris Solidity
serpine3 cbg17	M1	left	yes	P	V	0.742	0.934
serpine3 cbg17	M1	right	yes	A	V	0.848	0.962
serpine3 cbg17	M2	left	no	NA	NA	0.887	0.997
serpine3 cbg17	M2	right	no	NA	NA	0.867	0.991
serpine3 cbg17	M3	left	yes, weak	P	NA	0.889	0.992
serpine3 cbg17	M3	right	no	NA	NA	0.896	0.996
serpine3 cbg17	M4	left	no	NA	NA	0.896	0.994
serpine3 cbg17	M4	right	yes	P	V	0.884	0.994
serpine3 cbg17	M5	left	yes	A	V	0.843	0.974
serpine3 cbg17	M5	right	no	NA	NA	0.881	0.99
WT cbg17	M1	left	no	NA	NA	0.891	0.997
WT cbg17	M1	right	no	NA	NA	0.893	0.996
WT cbg17	M2	left	no	NA	NA	0.909	0.997
WT cbg17	M2	right	no	NA	NA	0.893	0.996
WT cbg17	M3	left	no	NA	NA	0.882	0.992
WT cbg17	M3	right	no	NA	NA	0.89	0.994
WT cbg17	M4	left	no	NA	NA	0.896	0.998
WT cbg17	M4	right	no	NA	NA	0.877	0.993
WT cbg17	M5	left	no	NA	NA	0.883	0.995
WT cbg17	M5	right	no	NA	NA	0.911	0.995
WT cbg17	M6	left	no	NA	NA	0.88	0.994
WT cbg17	M6	right	no	NA	NA	0.895	0.996
WT cbg17	M7	left	no	NA	NA	0.911	0.995
WT cbg17	M7	right	no	NA	NA	0.909	0.997
WT cbg17	M8	left	no	NA	NA	0.865	0.994
WT cbg17	M8	right	no	NA	NA	0.905	0.996
serpine3 cbg18	F1	left	no	NA	NA	0.909	0.988
serpine3 cbg18	F1	right	no	NA	NA	0.891	0.994
serpine3 cbg18	M1	left	no	NA	NA	0.873	0.988
serpine3 cbg18	M1	right	maybe	A	V	0.832	0.985
serpine3 cbg18	F2	left	yes	A	V	0.879	0.992
serpine3 cbg18	F2	right	yes	A	V	0.87	0.987
serpine3 cbg18	M2	left	no	NA	NA	0.898	0.994
serpine3 cbg18	M2	right	no	NA	NA	0.897	0.993
serpine3 cbg18	F3	left	no	NA	NA	0.88	0.989
serpine3 cbg18	F3	right	yes	A	V	0.883	0.975
serpine3 cbg18	M3	left	no	NA	NA	0.888	0.992
serpine3 cbg18	M3	right	no	NA	NA	0.877	0.992
serpine3 cbg18	F4	left	no	NA	NA	0.884	0.992
serpine3 cbg18	F4	right	yes	A	V	0.836	0.965
serpine3 cbg18	M4	left	yes	A	V	0.868	0.966
serpine3 cbg18	M4	right	yes	A+P	V	0.88	0.983
serpine3 cbg18	F5	left	no	NA	NA	0.888	0.993
serpine3 cbg18	F5	right	no	NA	NA	0.893	0.993
serpine3 cbg18	M5	left	yes	A	V	0.87	0.974
serpine3 cbg18	M5	right	maybe	A	V	0.854	0.972
serpine3 cbg18	F6	left	yes, very weak	A	V	0.853	0.988
serpine3 cbg18	F6	right	no	NA	NA	0.905	0.997
serpine3 cbg18	M6	left	no	NA	NA	0.886	0.99
serpine3 cbg18	M6	right	yes	A	V	0.859	0.988
serpine3 cbg18	F7	left	no	NA	NA	0.88	0.99
serpine3 cbg18	F7	right	yes	A	V	0.827	0.986
serpine3 cbg18	M7	left	yes	P	V	0.826	0.963
serpine3 cbg18	M7	right	no	NA	NA	0.873	0.986
serpine3 cbg18	F8	left	no	NA	NA	0.889	0.994
serpine3 cbg18	F8	right	no	NA	NA	0.887	0.986
serpine3 cbg18	M8	left	no	NA	NA	0.869	0.988
serpine3 cbg18	M8	right	yes, very weak	P	V	0.86	0.971
serpine3 cbg18	F9	left	yes	A	V	0.873	0.974
serpine3 cbg18	F9	right	yes	A	V	0.855	0.984
serpine3 cbg18	M9	left	no	NA	NA	0.891	0.997
serpine3 cbg18	M9	right	yes, very weak	P	V	0.86	0.977
serpine3 cbg18	F10	left	yes	A	V	0.82	0.989
serpine3 cbg18	F10	right	yes	A+P	V	0.813	0.948
serpine3 cbg18	M10	left	yes	A	V	0.843	0.976
serpine3 cbg18	M10	right	no	NA	NA	0.887	0.995
WT cbg18	F1	left	no	NA	NA	0.895	0.994
WT cbg18	F1	right	no	NA	NA	0.893	0.996
WT cbg18	M1	left	no	NA	NA	0.899	0.994
WT cbg18	M1	right	no	NA	NA	0.892	0.997
WT cbg18	F2	left	no	NA	NA	0.891	0.996
WT cbg18	F2	right	no	NA	NA	0.892	0.995
WT cbg18	M2	left	no	NA	NA	0.893	0.996
WT cbg18	M2	right	no	NA	NA	0.91	0.996
WT cbg18	F3	left	no	NA	NA	0.886	0.995
WT cbg18	F3	right	no	NA	NA	0.884	0.994
WT cbg18	M3	left	no	NA	NA	0.883	0.994
WT cbg18	M3	right	no	NA	NA	0.901	0.997
WT cbg18	F4	left	no	NA	NA	0.876	0.994
WT cbg18	F4	right	no	NA	NA	0.912	0.996
WT cbg18	M4	left	no	NA	NA	0.893	0.995
WT cbg18	M4	right	no	NA	NA	0.895	0.996
WT cbg18	F5	left	no	NA	NA	0.886	0.995
WT cbg18	F5	right	no	NA	NA	0.868	0.989
WT cbg18	M5	left	no	NA	NA	0.886	0.993
WT cbg18	M5	right	no	NA	NA	0.895	0.992
WT cbg18	F6	left	no	NA	NA	0.889	0.995
WT cbg18	F6	right	no	NA	NA	0.902	0.996
WT cbg18	M6	left	no	NA	NA	0.914	0.997
WT cbg18	M6	right	no	NA	NA	0.893	0.997
WT cbg18	F7	left	no	NA	NA	0.887	0.996
WT cbg18	F7	right	no	NA	NA	0.888	0.996
WT cbg18	M7	left	no	NA	NA	0.894	0.993
WT cbg18	M7	right	no	NA	NA	0.921	0.995
WT cbg18	F8	left	no	NA	NA	0.907	0.996
WT cbg18	F8	right	no	NA	NA	0.899	0.997
WT cbg18	M8	left	yes, very weak	A	V	0.816	0.982
WT cbg18	M8	right	no	NA	NA	0.892	0.994
WT cbg18	F9	left	yes	A	V	0.755	0.955
WT cbg18	F9	right	no	NA	NA	0.887	0.997
WT cbg18	M9	left	no	NA	NA	0.889	0.994
WT cbg18	M9	right	no	NA	NA	0.887	0.992
WT cbg18	F10	left	no	NA	NA	0.89	0.996
WT cbg18	F10	right	no	NA	NA	0.883	0.997
WT cbg18	M10	left	no	NA	NA	0.883	0.998
WT cbg18	M10	right	no	NA	NA	0.894	0.996
