# Supplementary material for: Vision-related convergent gene losses reveal SERPINE3’s unknown role in the eye
Source: eLife. 2022 Jun 21;11:e77999. doi: 10.7554/eLife.77999 (PMC9355568; doi:10.7554/eLife.77999)
Supplement: Figure 4—source data 3. [file elife-77999-fig4-data3.xls]

## Sheet: Figure 4 - Source data 4
Figure 4 - Source data 3: Single nucleotide polymorphism near SERPINE3 (13: 51,341,032-51,362,101) are associated with human eye phenotypes
LD – linkage disequilibrium.
SNP name	Location on GrCH38.p13	associated trait	Publication	possible functional consequences	Comments
rs9526736	13: 51,224,861	refractive error	Hysi2020	EH38E1677071, distal enhancer like signature with H3K4me3 z=1.52 in RPE cells (Encode2020)	intronic (FAM124a), excluded as not in LD (r2 < 0.2) with SERPINE3
rs1028727	13:51,326,306	area of optic nerve head	Bonnemaijer2019	-	intergenic between SERPINE3 and FAM124a
rs7327381	13: 51,432,509	corneal curvature	Fan2020	overlapping with SERPINE3 enhancer GH13J051432/ENSR00000482077 (Lee2020)	intronic (INTS6)
Reference key	Citation	PMID
Hysi2020	Hysi PG, Choquet H, Khawaja AP, Wojciechowski R, Tedja MS, Yin J, Simcoe MJ, Patasova K, Mahroo OA, Thai KK, Cumberland PM, Melles RB, Verhoeven VJM, Vitart V, Segre A, Stone RA, Wareham N, Hewitt AW, Mackey DA, Klaver CCW, MacGregor S; Consortium for Refractive Error and Myopia, Khaw PT, Foster PJ; UK Eye and Vision Consortium, Guggenheim JA; 23andMe Inc., Rahi JS, Jorgenson E, Hammond CJ. Meta-…	PMID: 32231278
Bonnemaijer2019	Bonnemaijer PWM, Leeuwen EMV, Iglesias AI, Gharahkhani P, Vitart V, Khawaja AP, Simcoe M, Höhn R, Cree AJ, Igo RP; International Glaucoma Genetics Consortium; NEIGHBORHOOD consortium; UK Biobank Eye and Vision Consortium, Gerhold-Ay A, Nickels S, Wilson JF, Hayward C, Boutin TS, Polašek O, Aung T, Khor CC, Amin N, Lotery AJ, Wiggs JL, Cheng CY, Hysi PG, Hammond CJ, Thiadens AAHJ, MacGregor S, Kla…	PMID: 31798171
Fan2020	Fan Q, Pozarickij A, Tan NYQ, Guo X, Verhoeven VJM, Vitart V, Guggenheim JA, Miyake M, Tideman JWL, Khawaja AP, Zhang L, MacGregor S, Höhn R, Chen P, Biino G, Wedenoja J, Saffari SE, Tedja MS, Xie J, Lanca C, Wang YX, Sahebjada S, Mazur J, Mirshahi A, Martin NG, Yazar S, Pennell CE, Yap M, Haarman AEG, Enthoven CA, Polling J; Consortium for Refractive Error and Myopia (CREAM); UK Biobank Eye and …	PMID: 32193507
Encode2020	ENCODE Project Consortium, Moore JE, Purcaro MJ, Pratt HE, Epstein CB, Shoresh N, Adrian J, Kawli T, Davis CA, Dobin A, Kaul R, Halow J, Van Nostrand EL, Freese P, Gorkin DU, Shen Y, He Y, Mackiewicz M, Pauli-Behn F, Williams BA, Mortazavi A, Keller CA, Zhang XO, Elhajjajy SI, Huey J, Dickel DE, Snetkova V, Wei X, Wang X, Rivera-Mulia JC, Rozowsky J, Zhang J, Chhetri SB, Zhang J, Victorsen A, Whi…	PMID: 32728249
Lee2020	Lee CM, Barber GP, Casper J, Clawson H, Diekhans M, Gonzalez JN, Hinrichs AS, Lee BT, Nassar LR, Powell CC, Raney BJ, Rosenbloom KR, Schmelter D, Speir ML, Zweig AS, Haussler D, Haeussler M, Kuhn RM, Kent WJ. UCSC Genome Browser enters 20th year. Nucleic Acids Res. 2020 Jan 8;48(D1):D756-D761. doi: 10.1093/nar/gkz1012. PMID: 31691824; PMCID: PMC7145642.	PMID: 31691824
