# Supplementary material for: Vision-related convergent gene losses reveal SERPINE3’s unknown role in the eye
Source: eLife journal article supplement (doi:10.7554/elife.77999), 2022-06-21

# A Common vampire bat genome (HLdesRot8A) manual\_scaffold\_11:88,446,025-88,466,426

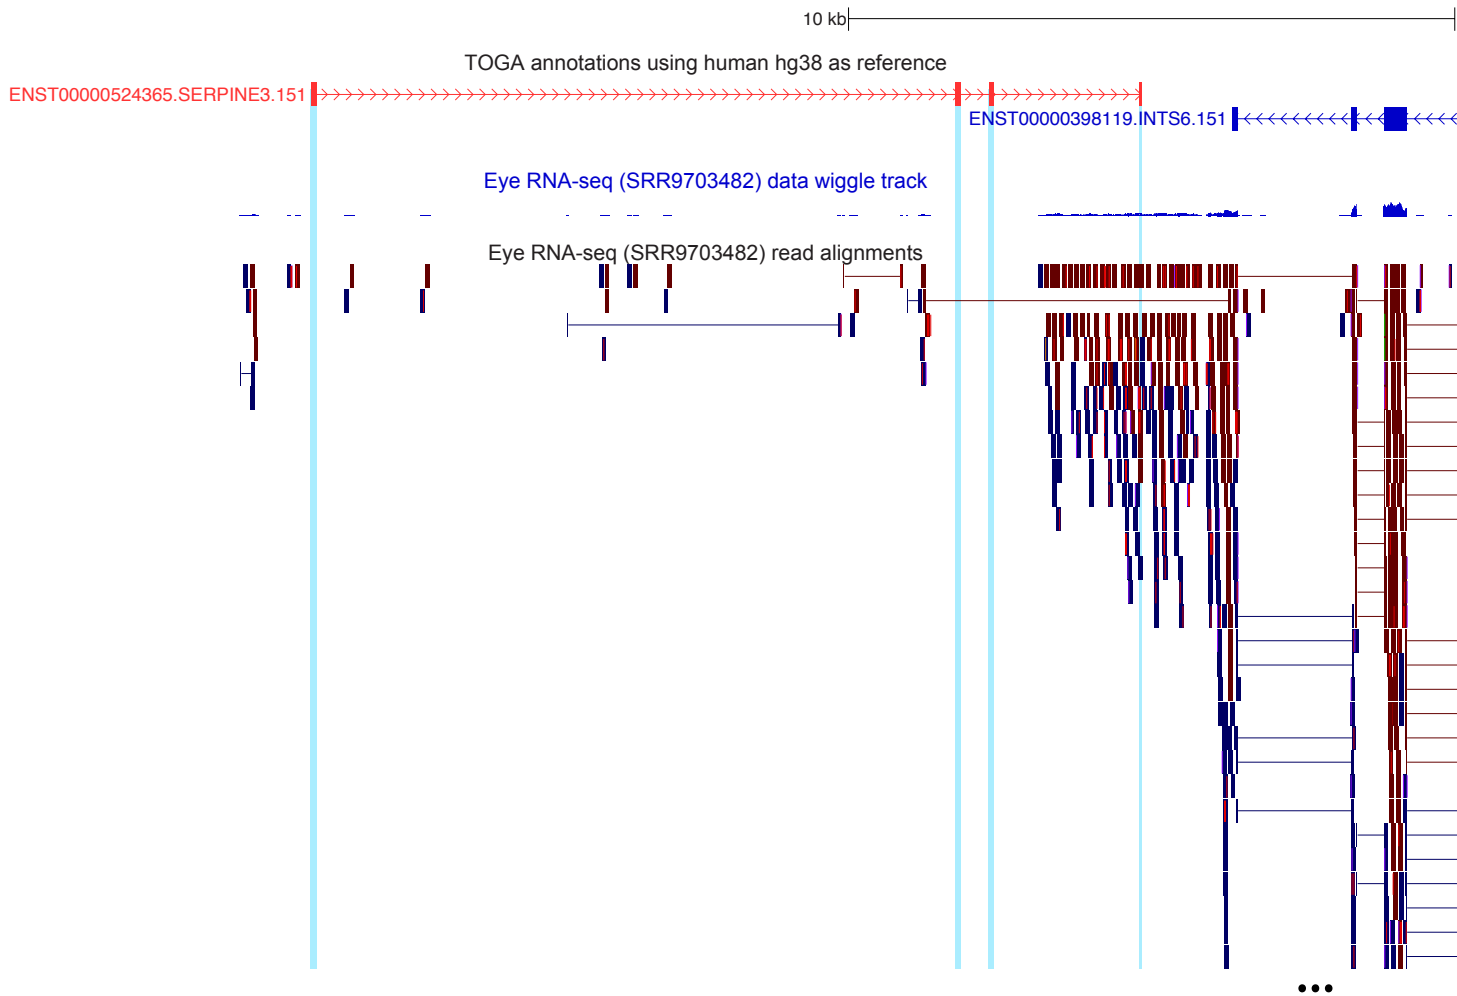

# B Common vampire bat genome (HLdesRot8A) manual\_scaffold\_14:90,725,500-90,732,264

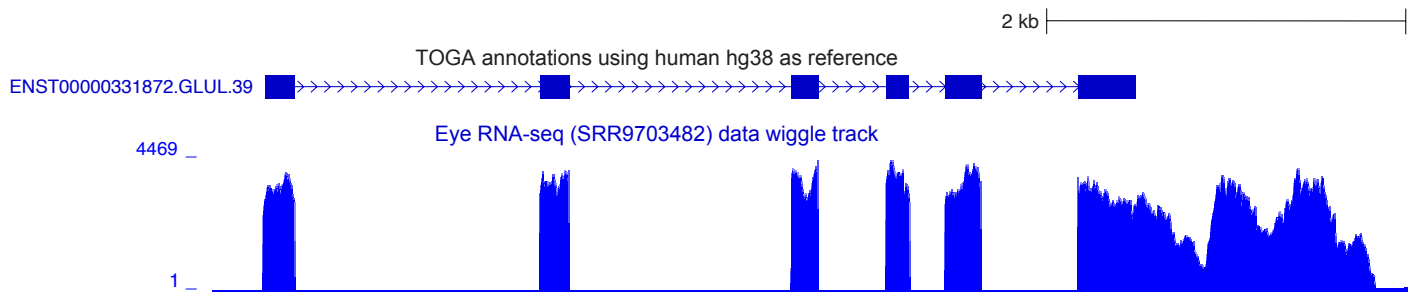

Supplement: supp [file elife_poa_e77999_Figure_2_figure_supplement_1.pdf › elife_poa_e77999_Figure_2_figure_supplement_1.pdf]
