# Supplementary material for: Vision-related convergent gene losses reveal SERPINE3’s unknown role in the eye
Source: eLife journal article supplement (doi:10.7554/elife.77999), 2022-06-21
Supplement: supp [file elife_poa_e77999_Figure_4_figure_supplement_1.pdf › elife_poa_e77999_Figure_4_figure_supplement_1.pdf]

A

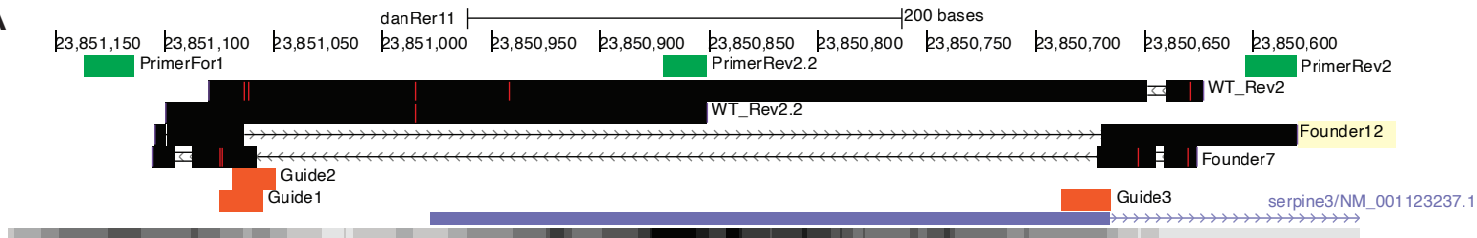

B

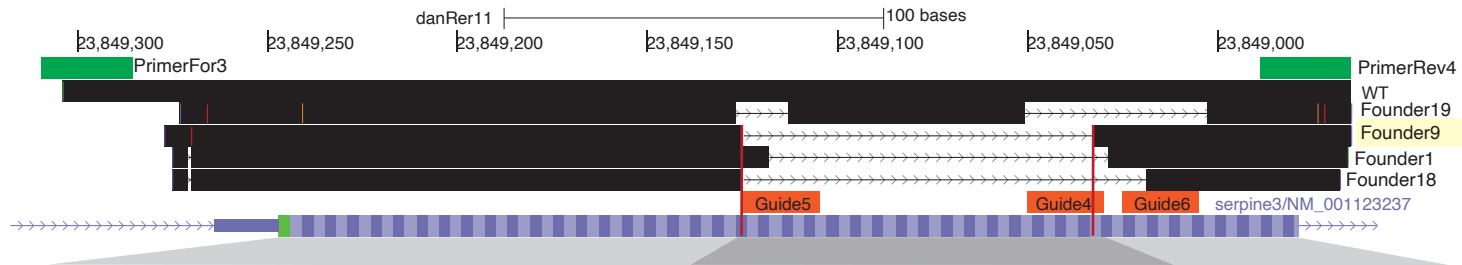

WT

MPQLSASSLFICLWLVDLCHVANSVLSSSFSDLHTQFGISLYQTLTETENKSNLIVSPASVSLCLGLLQLGARGNTLVQLEGT LGYDVND

Founder9 MPQLSASSLFICLWLVDLCHVANSVLSSSFSDLHTQFGISL-----QGKHSGSARGYIGI\***CQ\***
