# Supplementary material for: Vision-related convergent gene losses reveal SERPINE3’s unknown role in the eye
Source: eLife. 2022 Jun 21;11:e77999. doi: 10.7554/eLife.77999 (PMC9355568; doi:10.7554/eLife.77999)
Supplement: Supplementary file 3. [file elife-77999-supp3.xls]

## Sheet: Supplementary File 3
Supplementary File 3: Comparison of 3D structures of crystallized SERPINs to the predicted human SERPINE3
Differences in RMSD were calculated in Pymol by the align function.
Molecule	PDB ID	RMSD in Å to human SERPINE3	# Atoms aligned
SERPINI1, native	3F5N (chain A)	1.844	1851
SERPINI1, native	3F5N (chain B)	1.81	1814
SERPINI1, native	3F5N (chain C)	1.614	1669
SERPINI1, native	3F5N (chain D)	1.732	1813
SERPINI1, native	3F5N (chain E)	1.73	1755
SERPINI1, native	3FGQ (chain A)	1.541	1803
SERPINI1, native	3FGQ (chain B)	1.52	1804
SERPINE2, native	4DY0 (chain A)	1.676	1650
SERPINE2, native	4DY0 (chain B)	1.418	1611
SERPINE2, native	4DY7 (chain C)	1.472	1611
SERPINE2, native	4DY7 (chain F)	1.453	1623
SERPINF1, native	6LOS	1.71	1413
SERPINF1, native	1IMV	1.708	1323
SERPINE1, native	3PB1	1.814	1921
SERPINE1, native	4DTE (chain A)	1.741	1866
SERPINE1, native	4DTE (chain B)	1.45	1778
Constructed Serpin, native	5CDX	1,340	1657
Constructed Serpin, native	5CE0 (chain A)	1.348	1650
Constructed Serpin, native	5CE0 (chain B)	1.352	1652
