# Supplementary figures and images for: Vision-related convergent gene losses reveal SERPINE3’s unknown role in the eye
Source: eLife journal article supplement (doi:10.7554/elife.77999), 2022-06-21

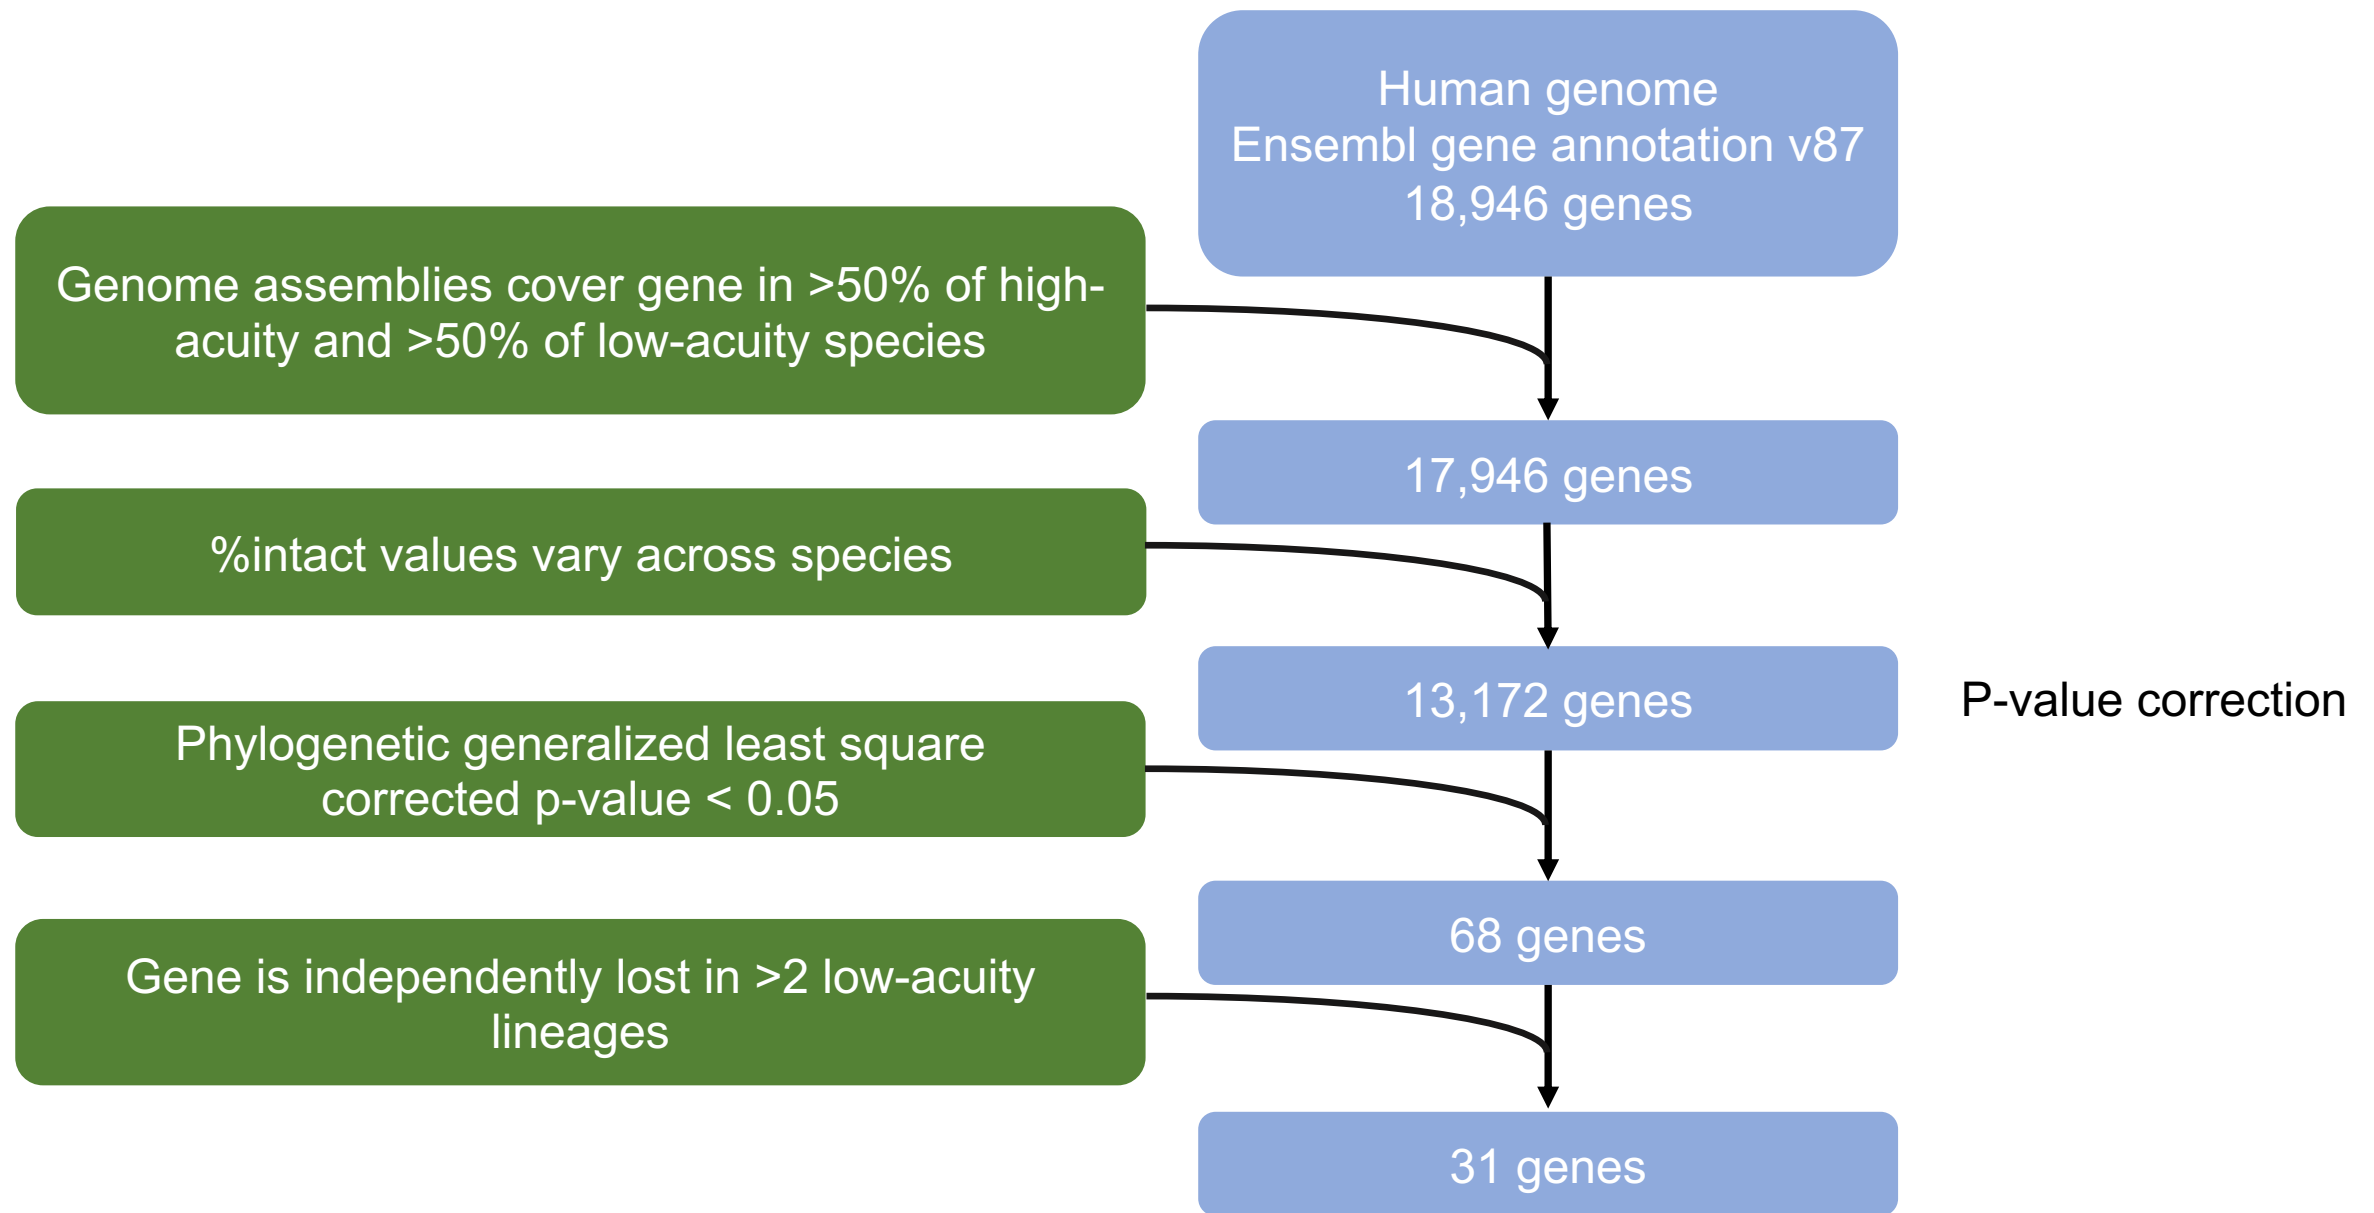

Supplement: supp [file elife_poa_e77999_Figure_1_figure_supplement_1.pdf › elife_poa_e77999_Figure_1_figure_supplement_1.pdf]

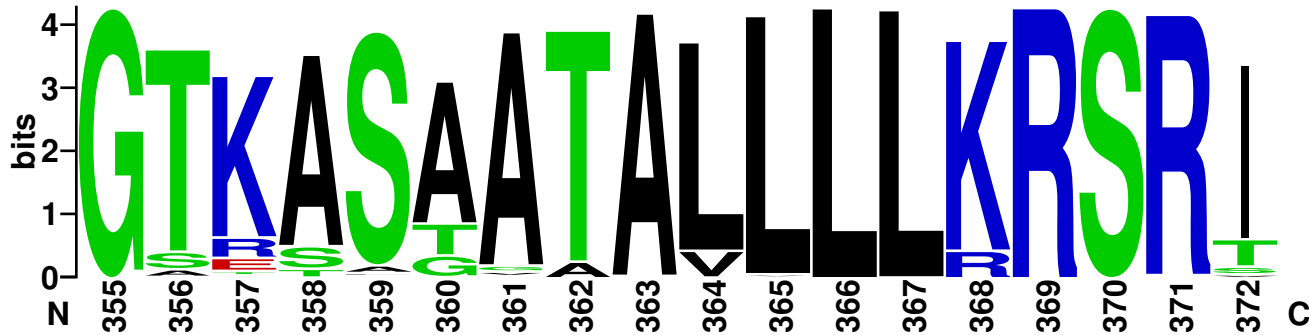

Supplement: supp [file elife_poa_e77999_Figure_2_figure_supplement_10.pdf › elife_poa_e77999_Figure_2_figure_supplement_10.pdf]

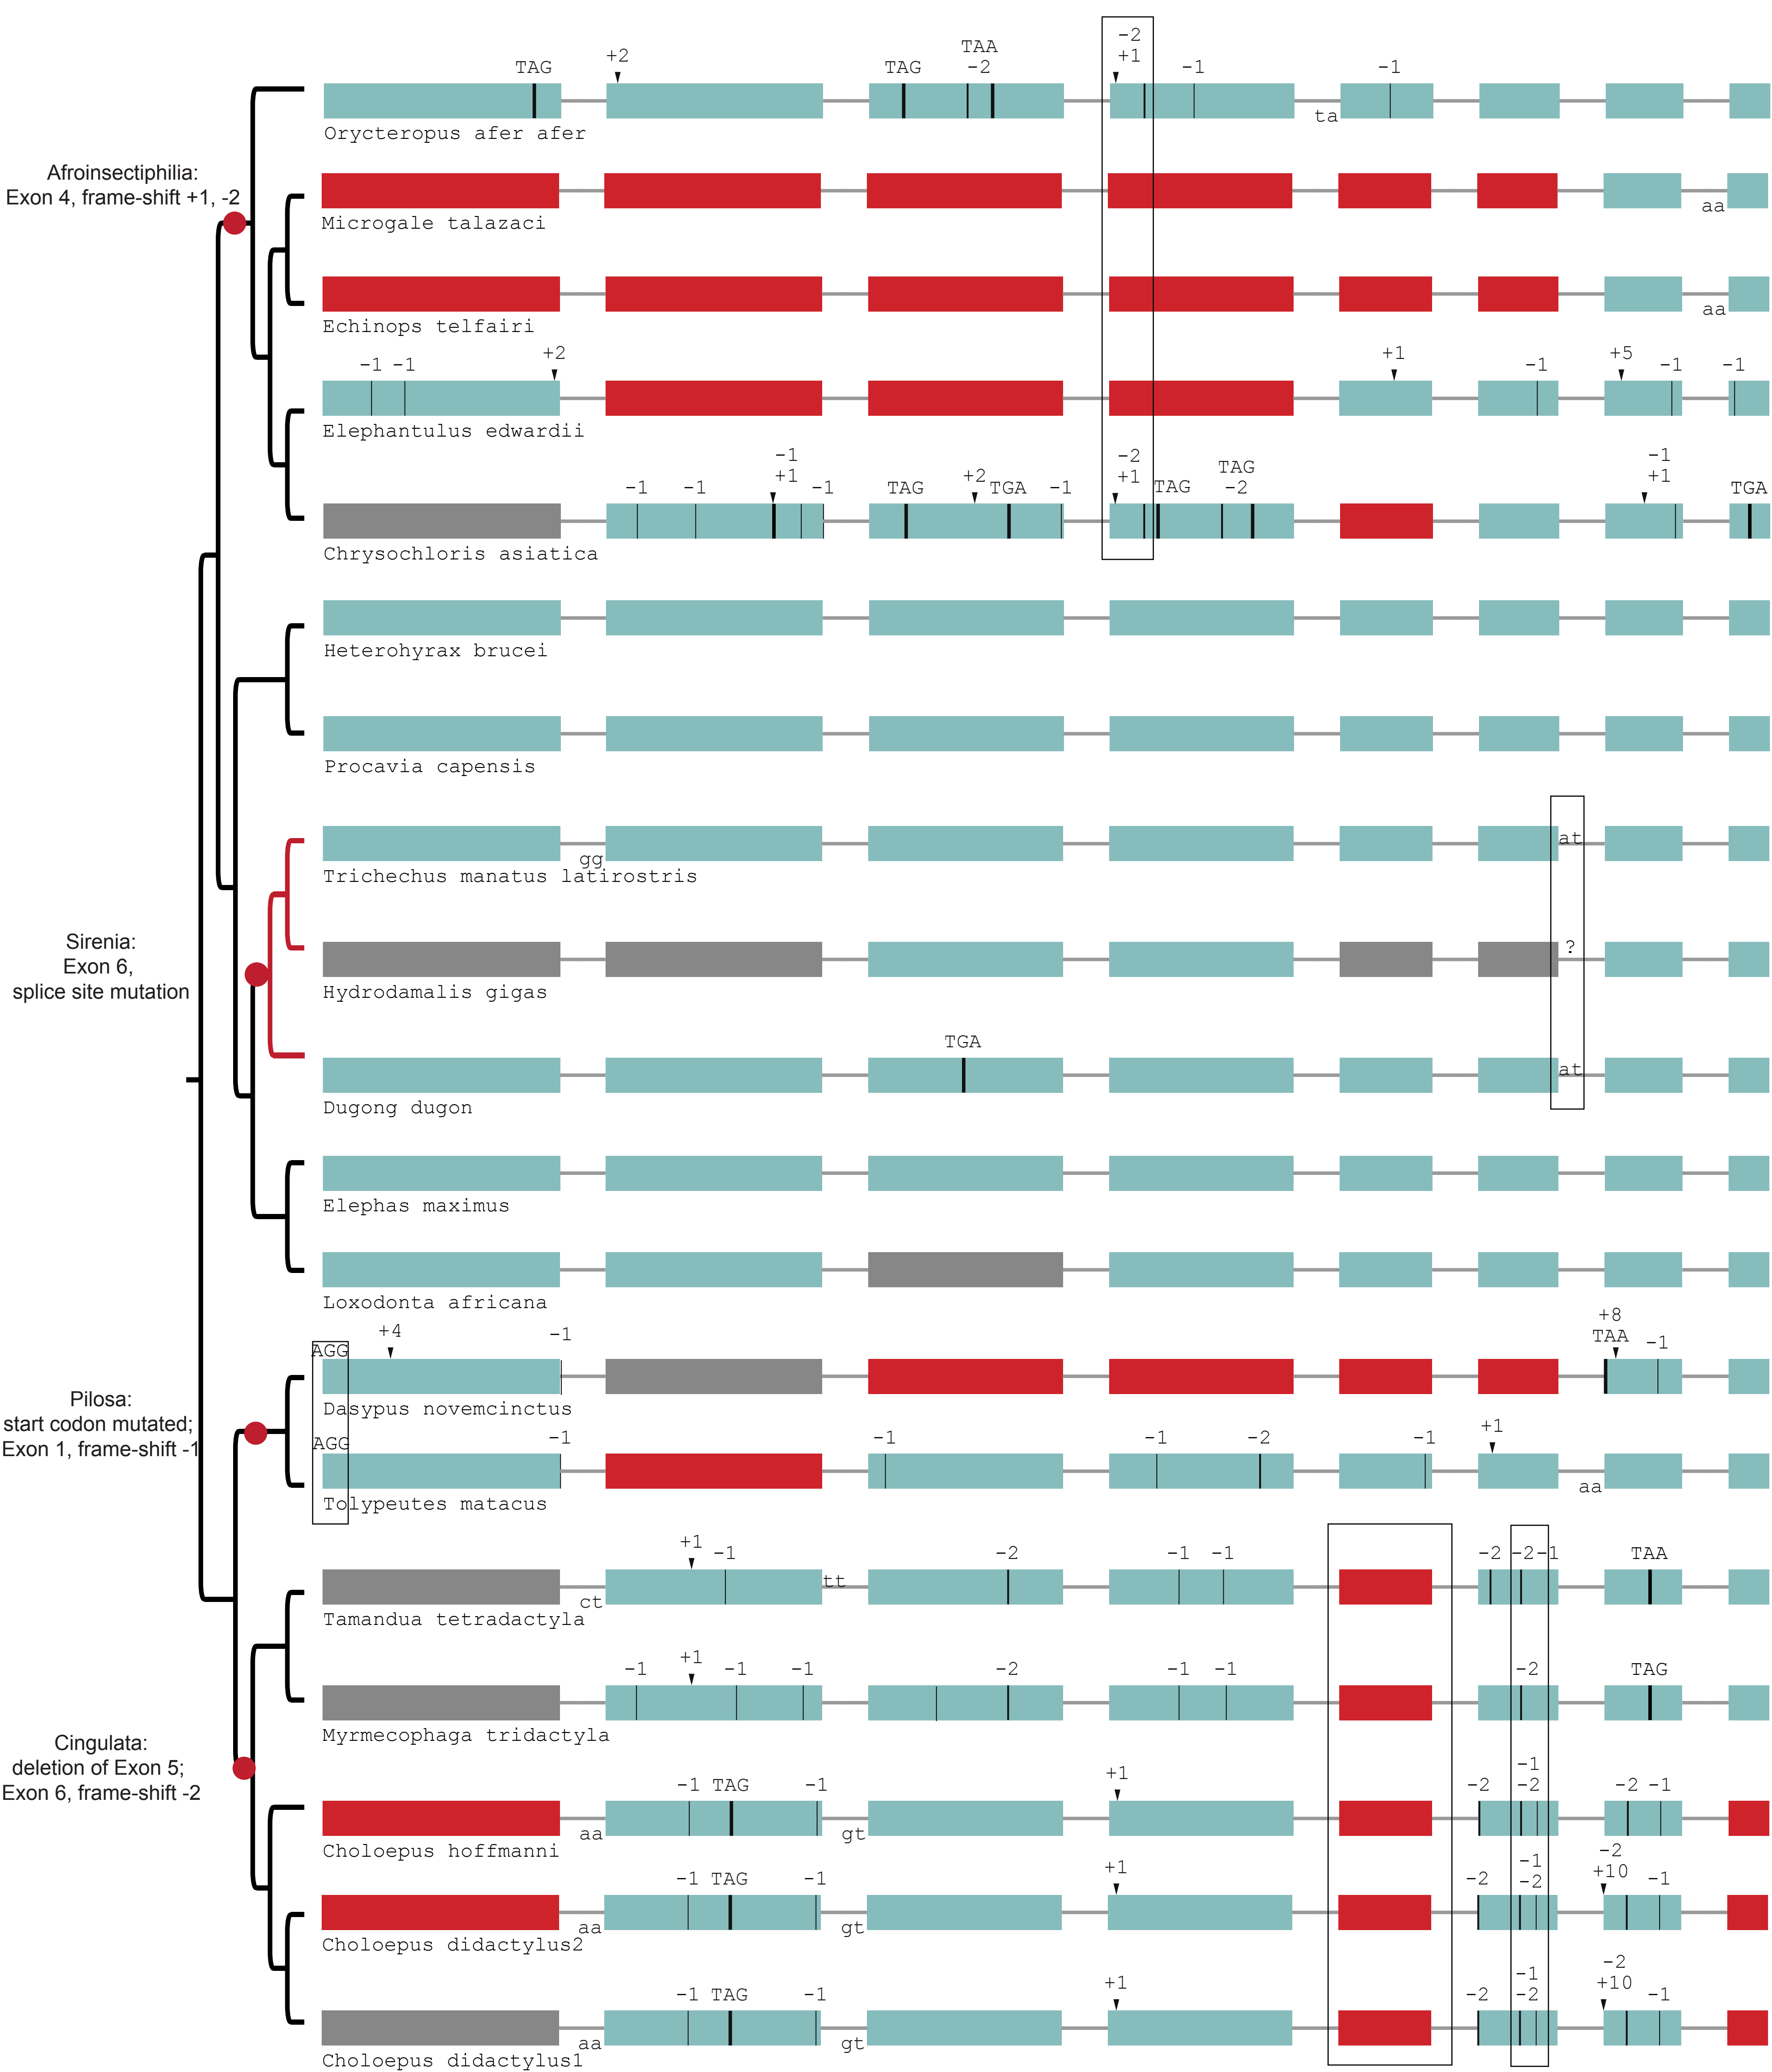

Supplement: supp [file elife_poa_e77999_Figure_2_figure_supplement_2.pdf › elife_poa_e77999_Figure_2_figure_supplement_2.pdf]

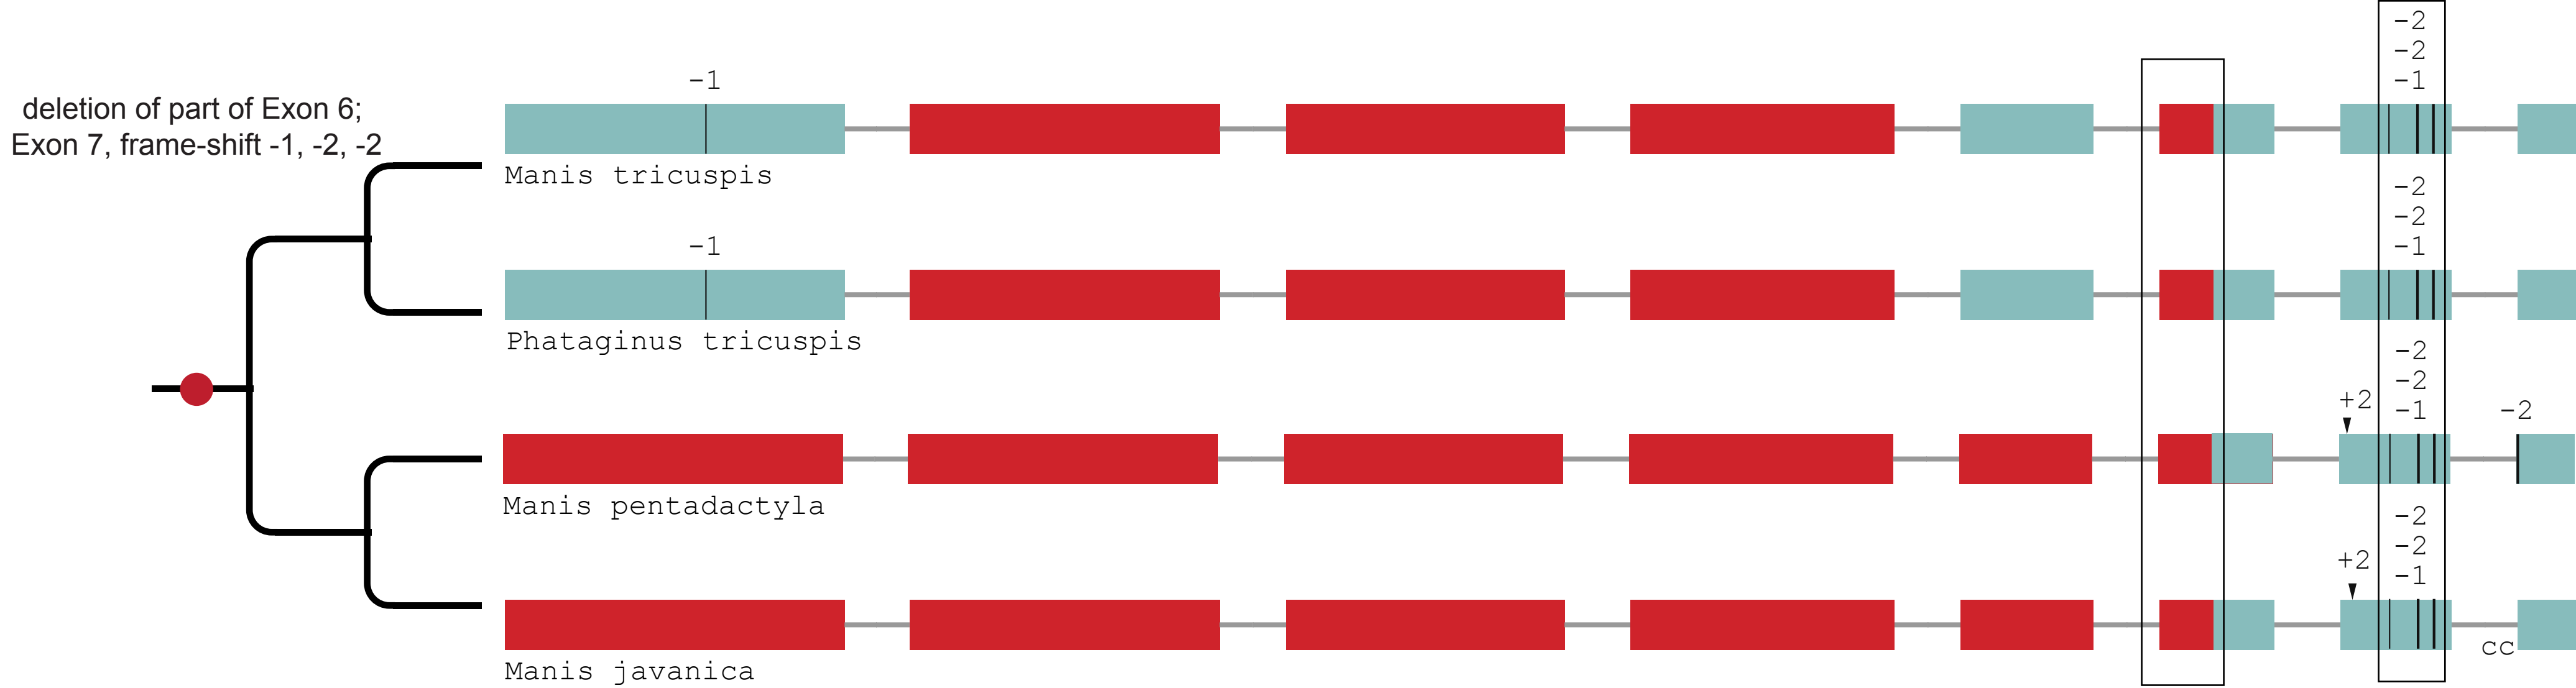

Supplement: supp [file elife_poa_e77999_Figure_2_figure_supplement_3.pdf › elife_poa_e77999_Figure_2_figure_supplement_3.pdf]

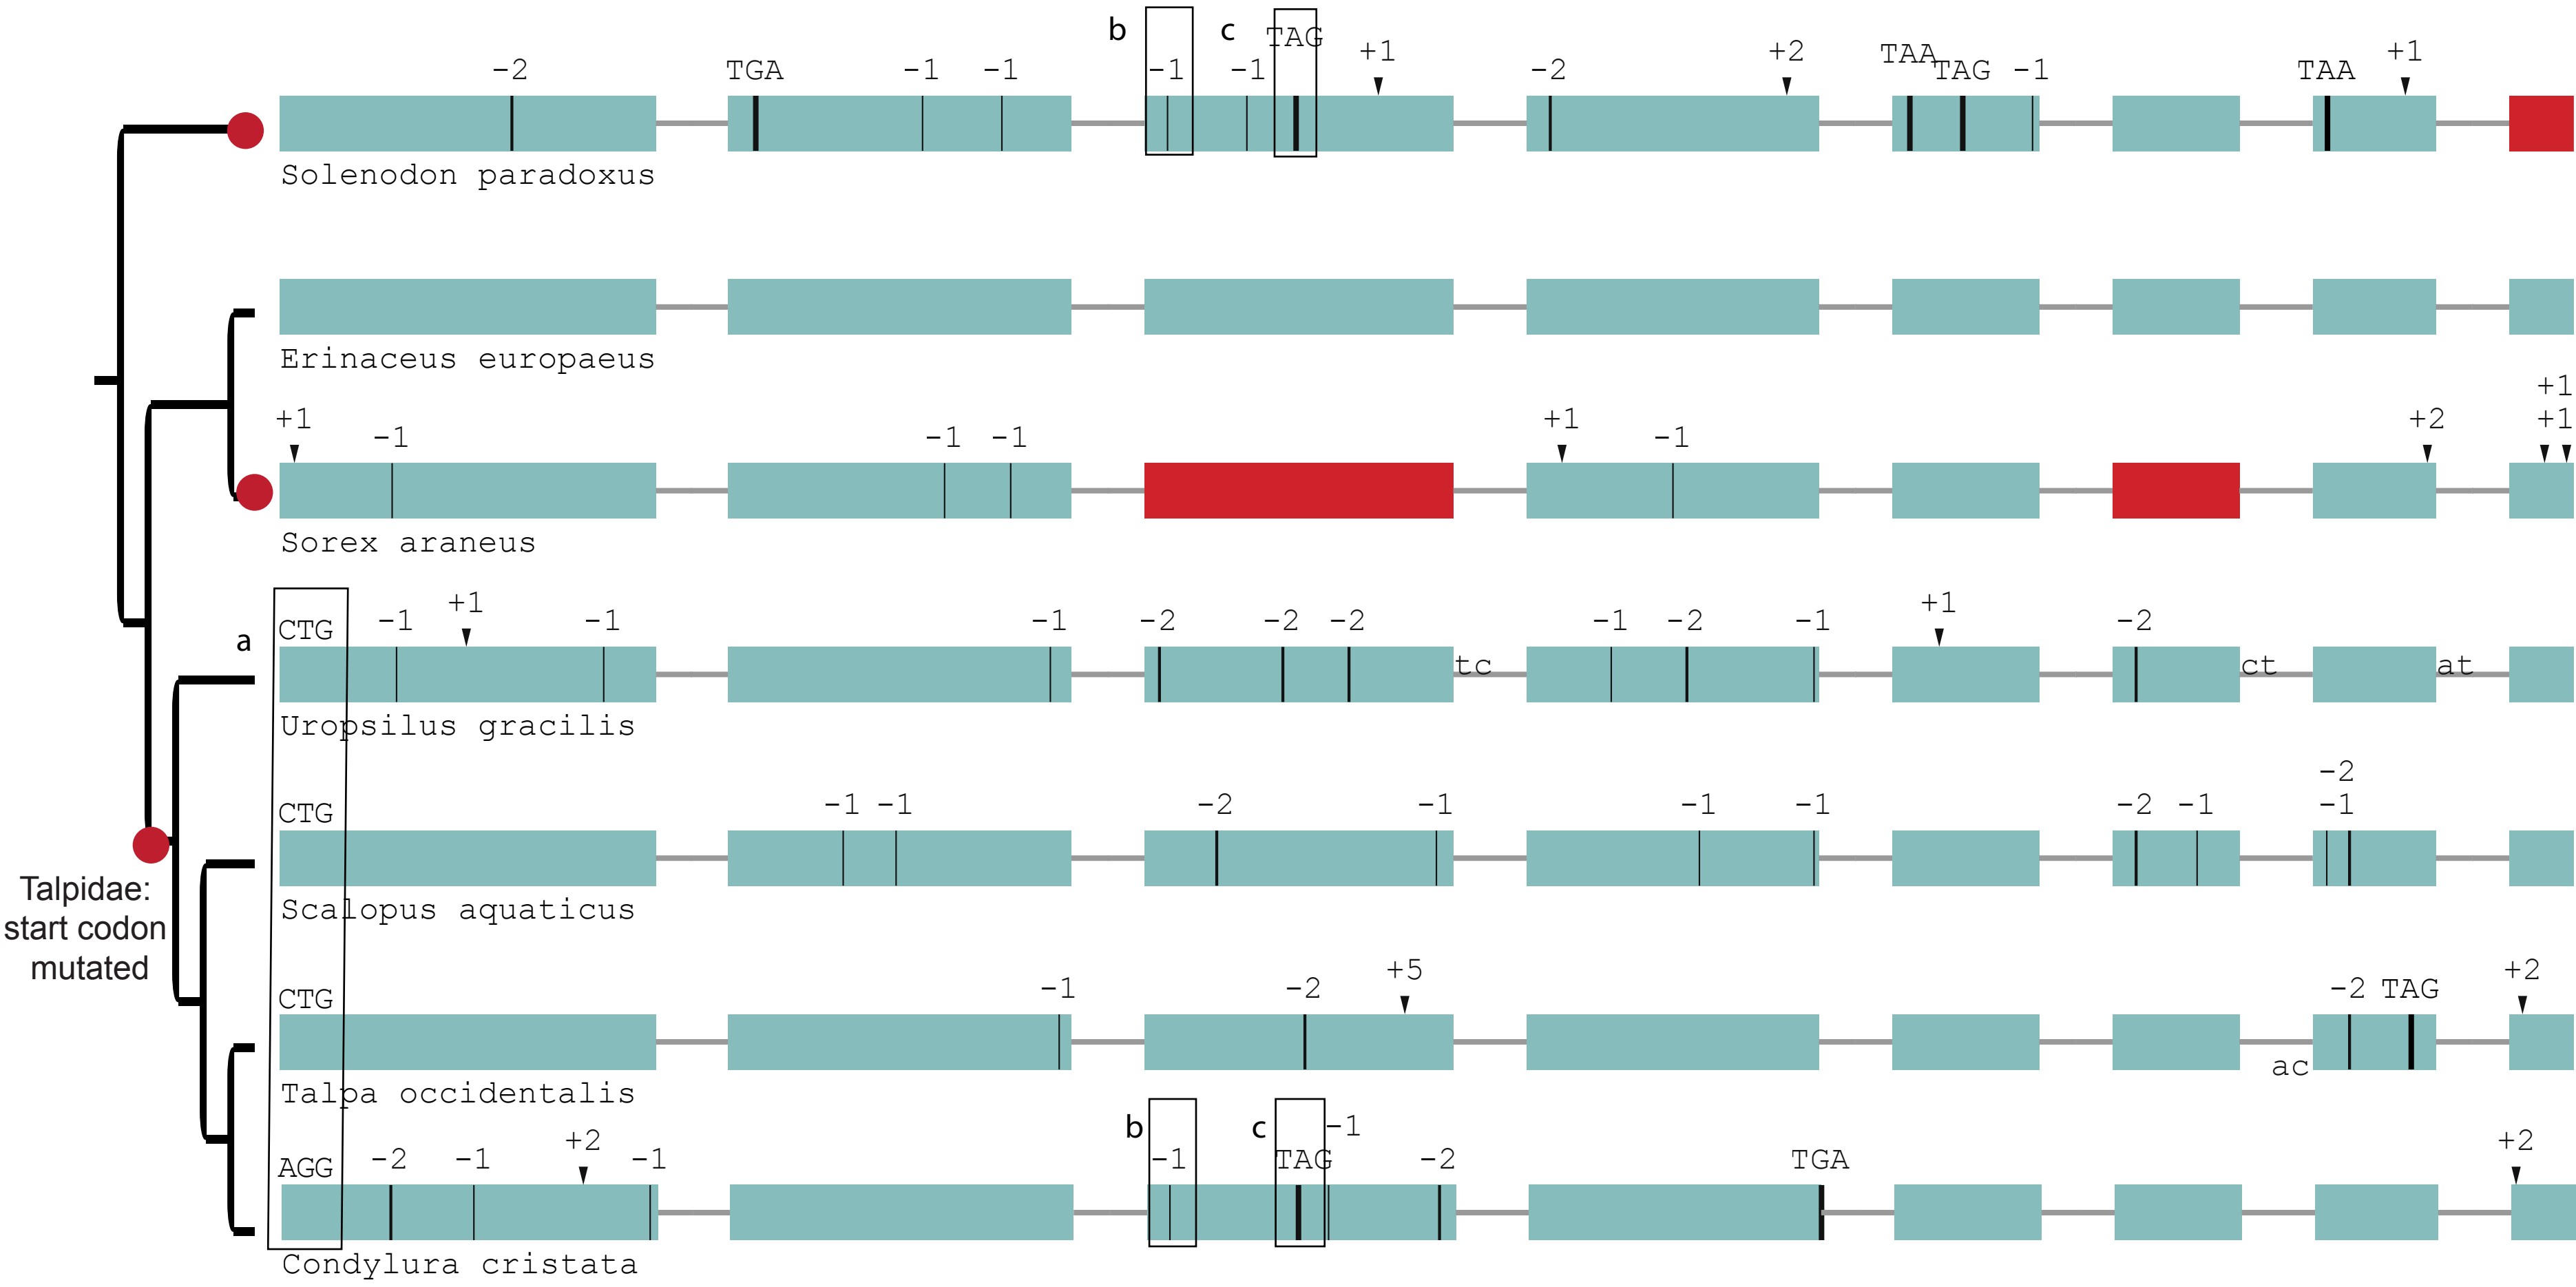

Supplement: supp [file elife_poa_e77999_Figure_2_figure_supplement_4.pdf › elife_poa_e77999_Figure_2_figure_supplement_4.pdf]

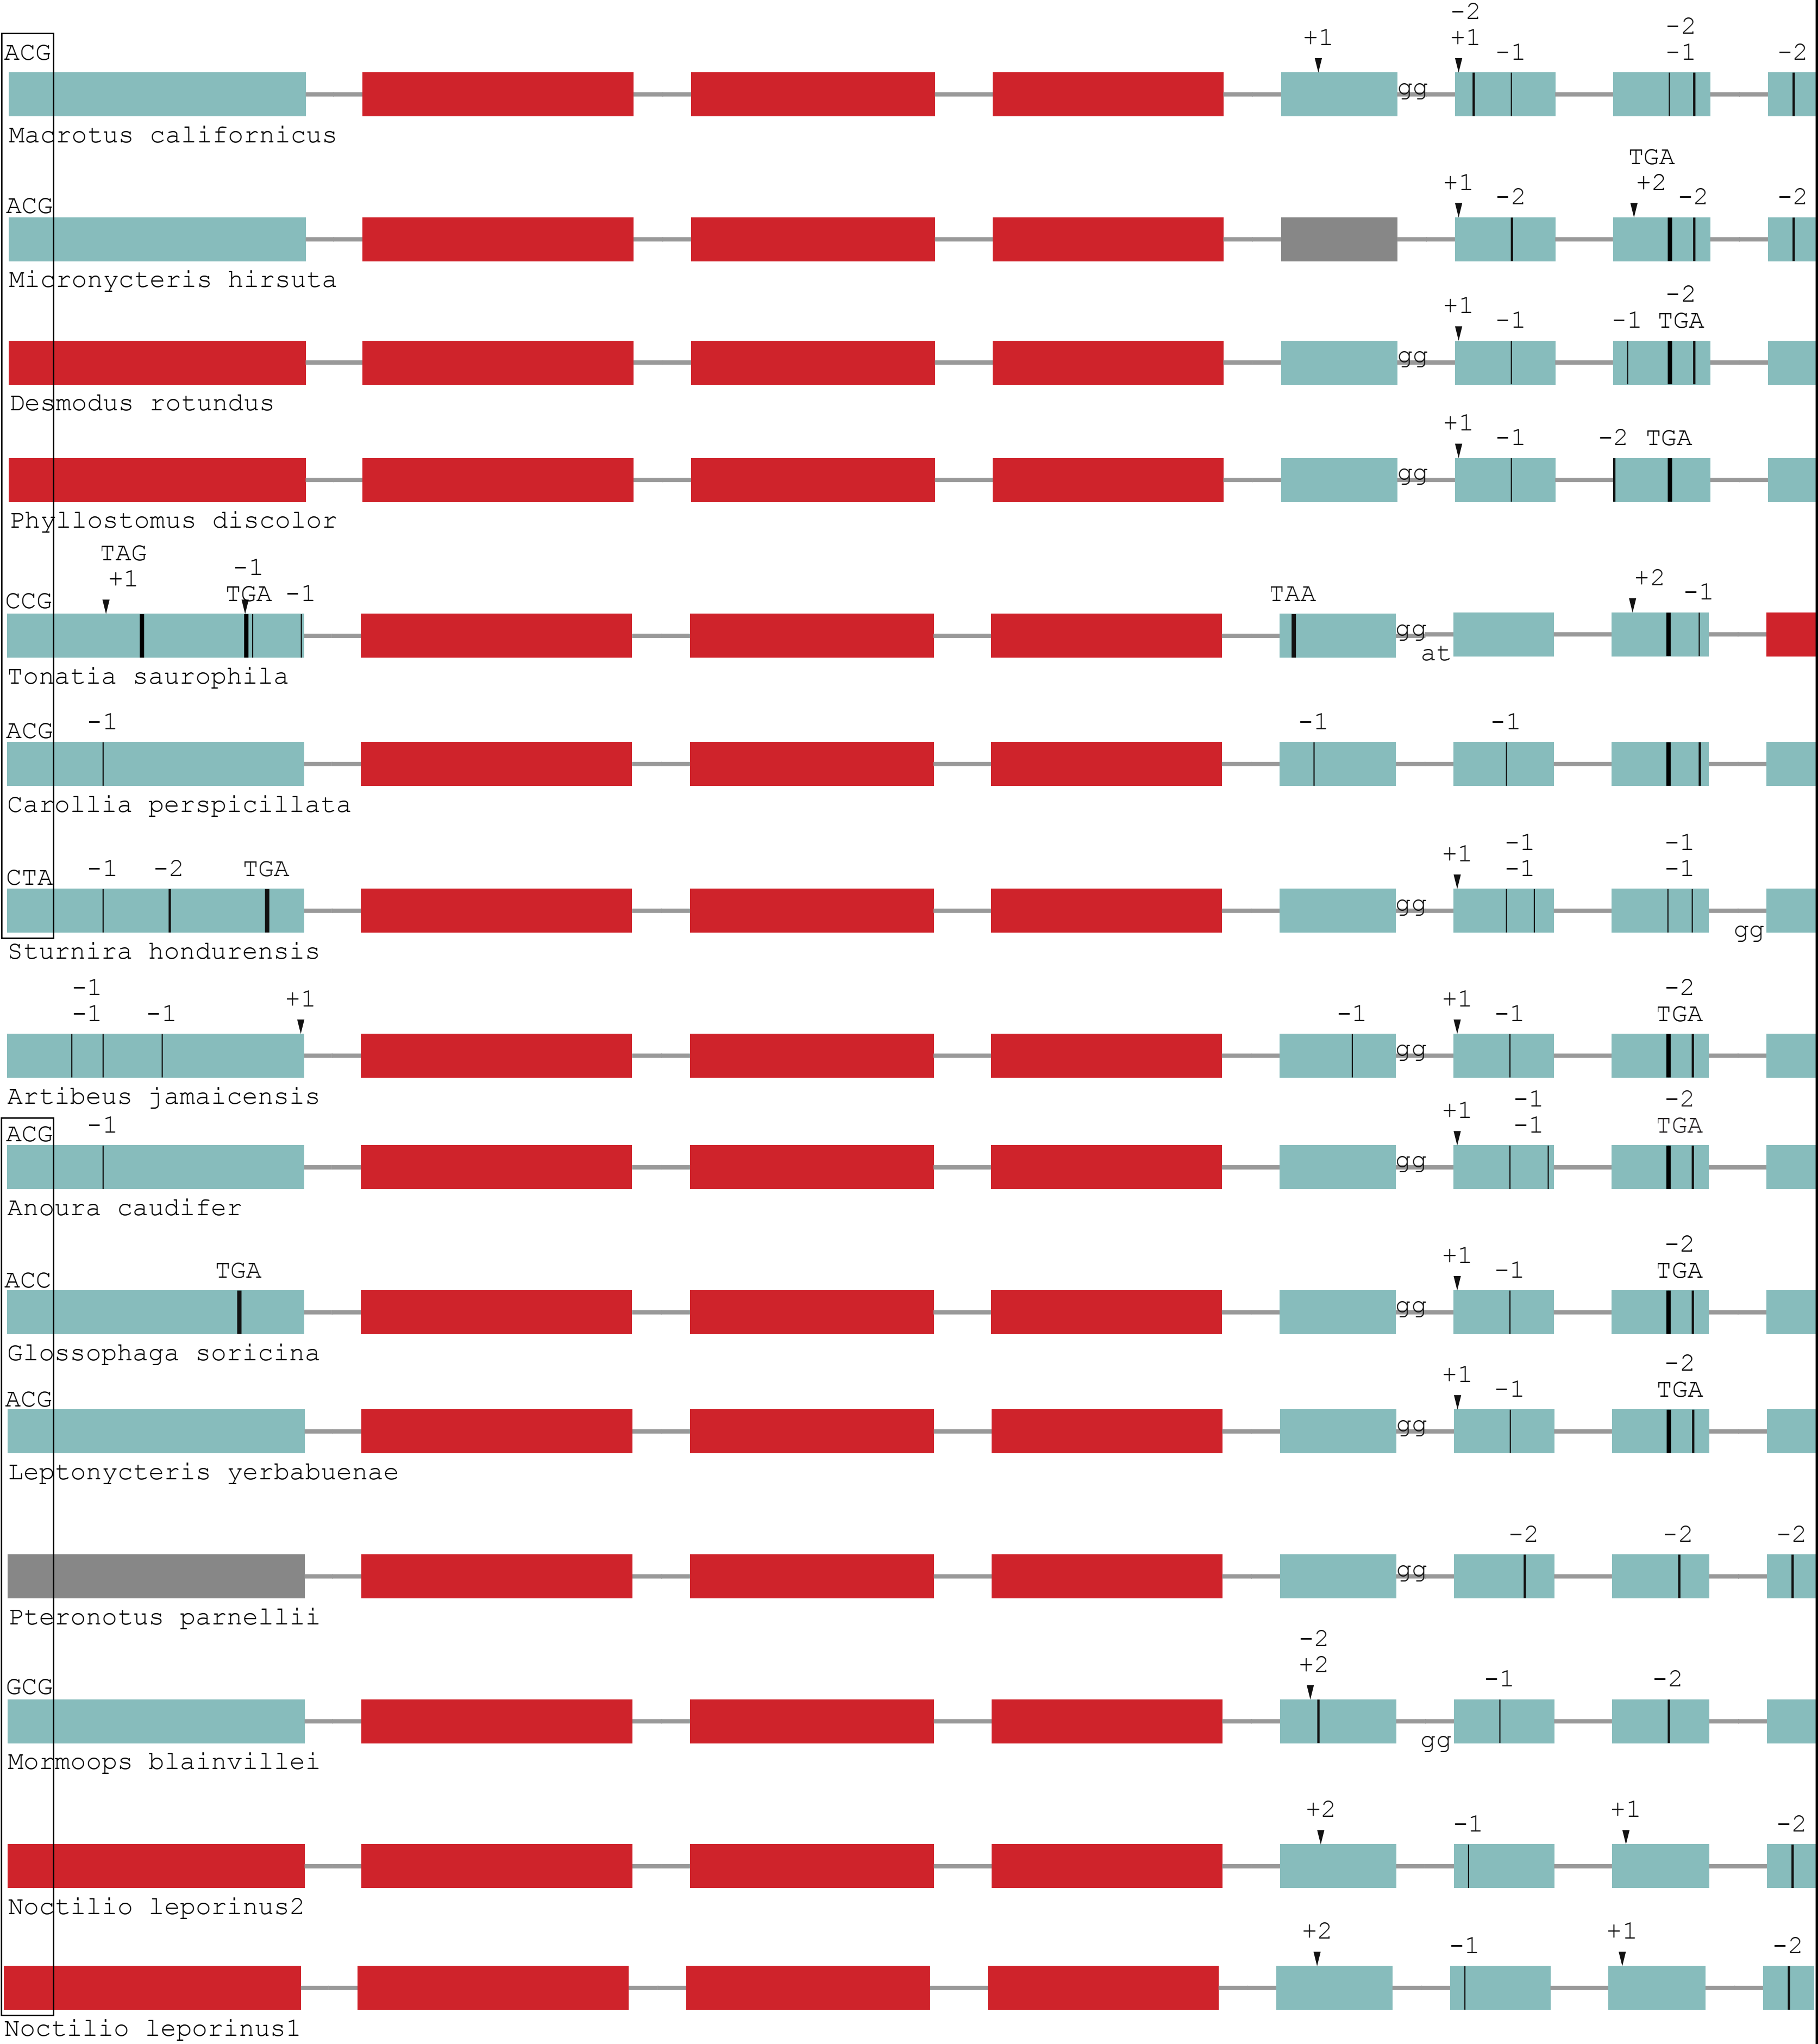

Supplement: supp [file elife_poa_e77999_Figure_2_figure_supplement_6.pdf › elife_poa_e77999_Figure_2_figure_supplement_6.pdf]

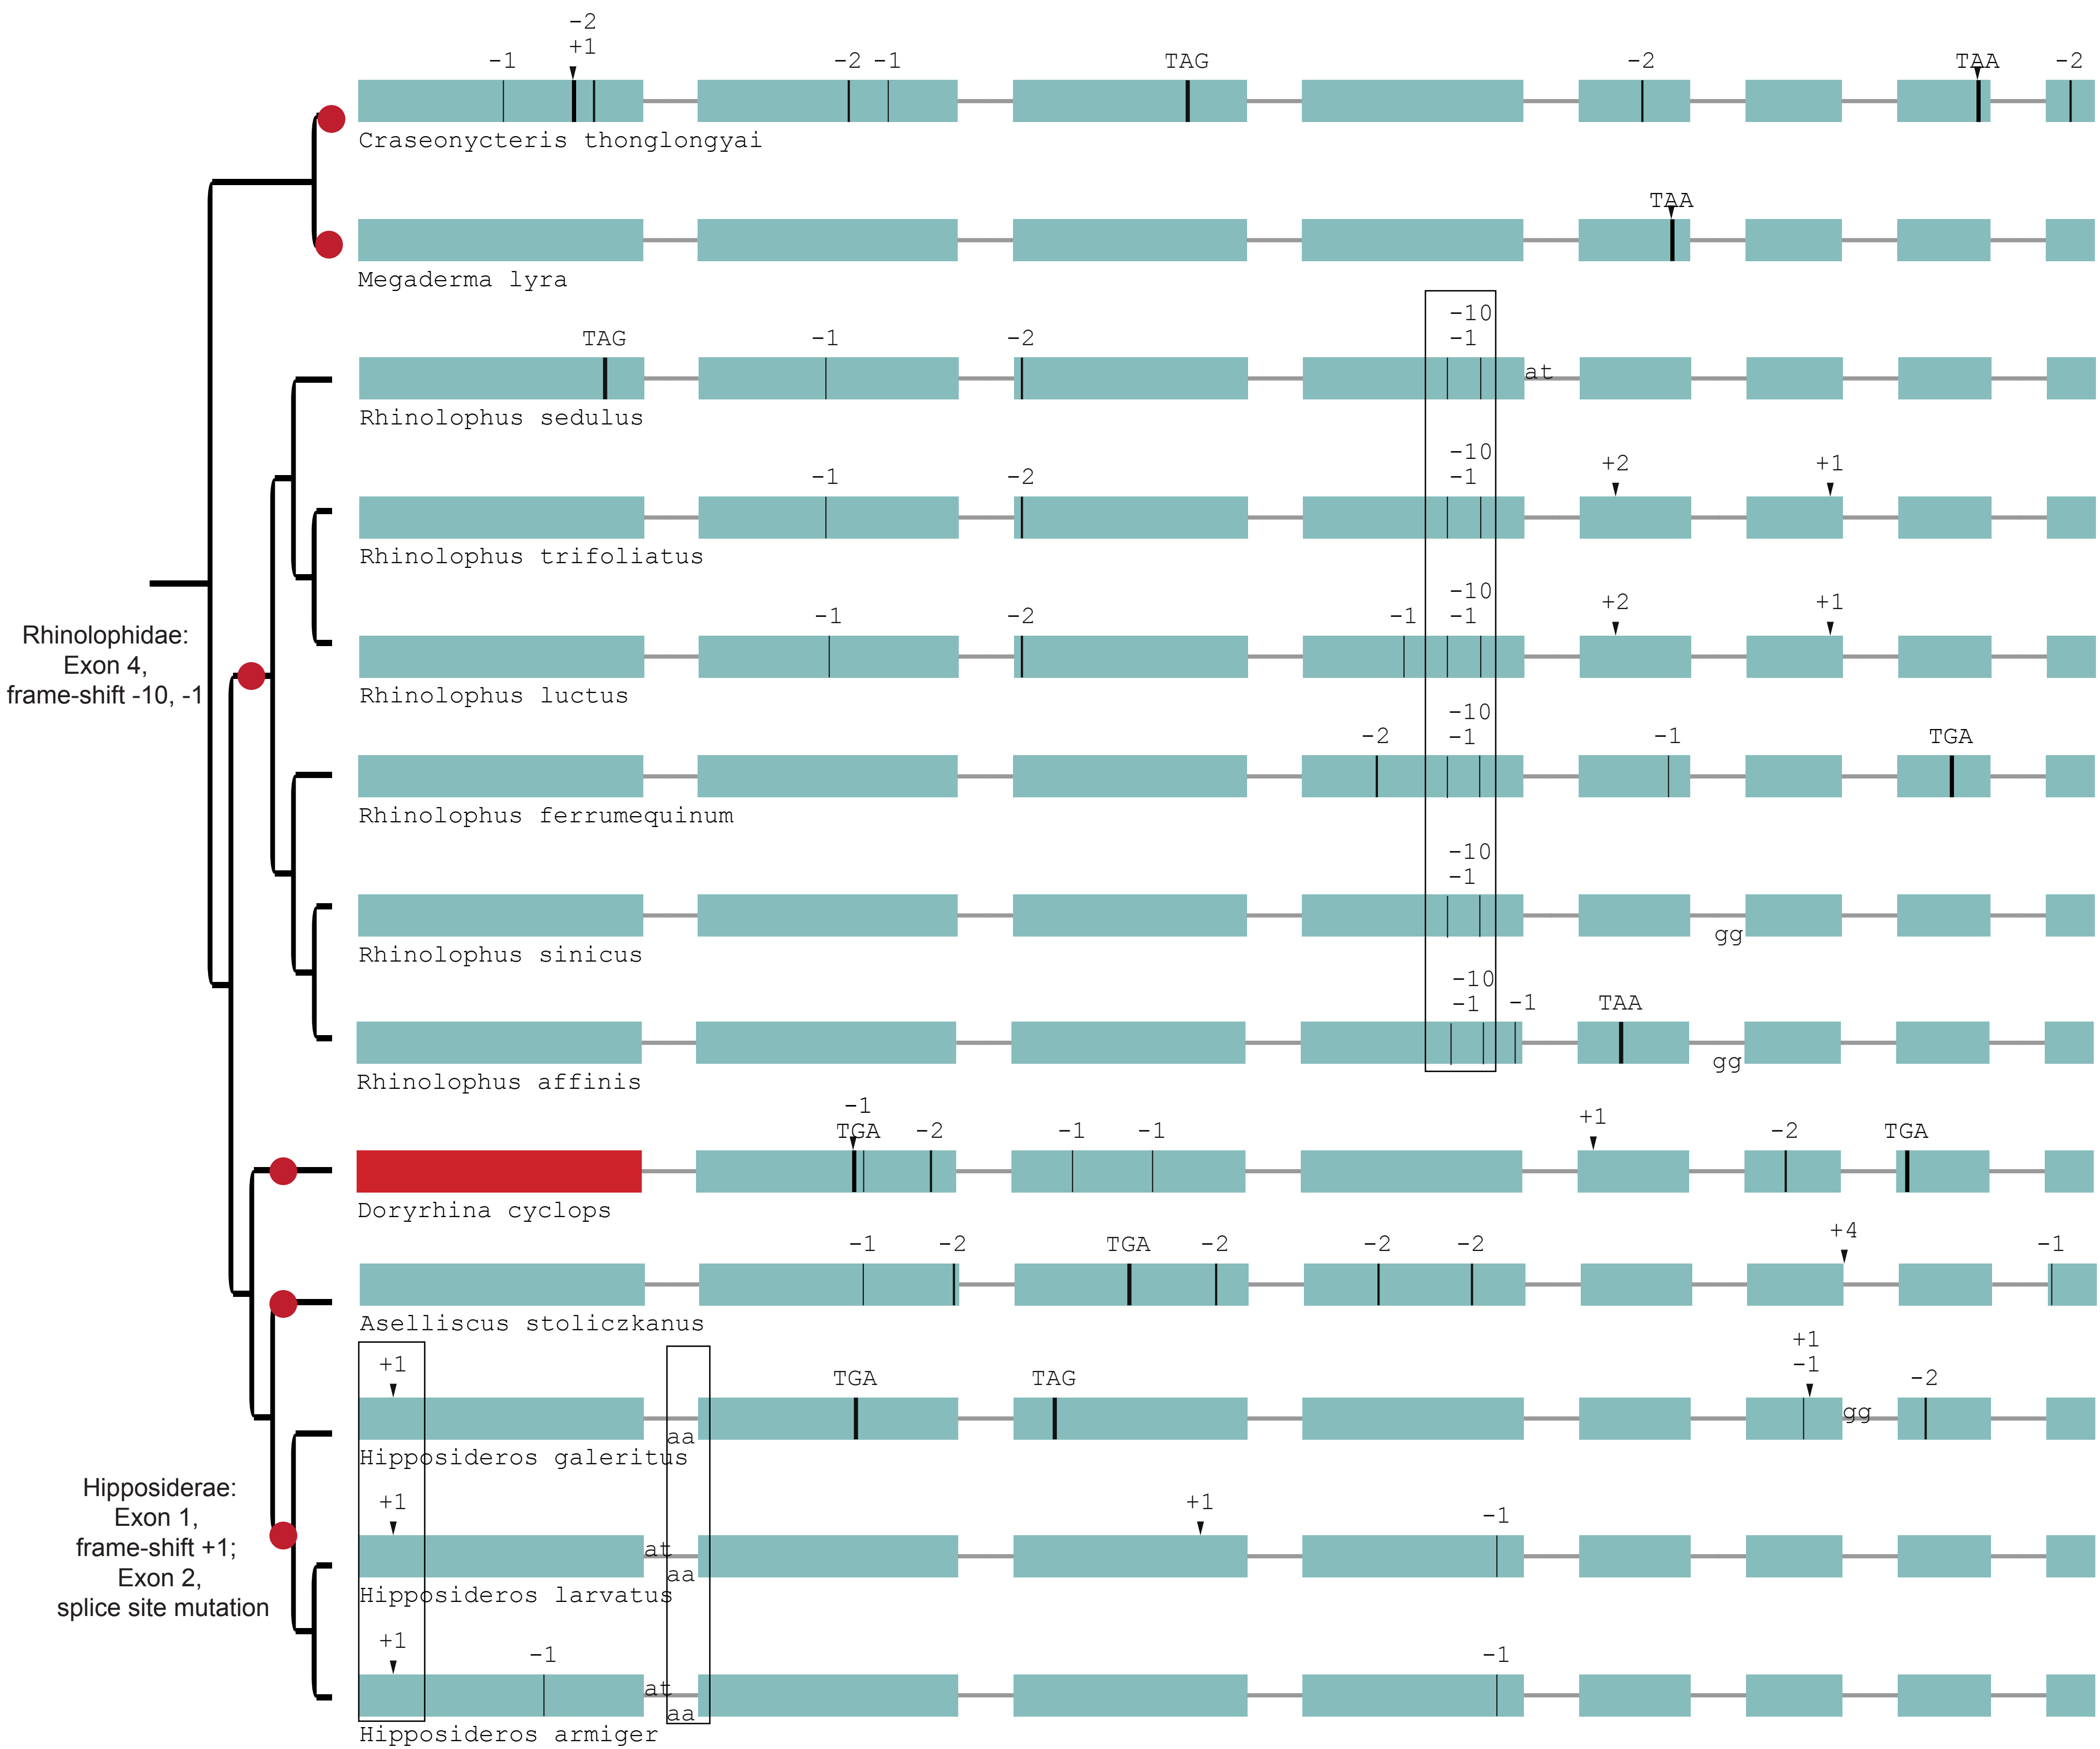

Supplement: supp [file elife_poa_e77999_Figure_2_figure_supplement_7.pdf › elife_poa_e77999_Figure_2_figure_supplement_7.pdf]

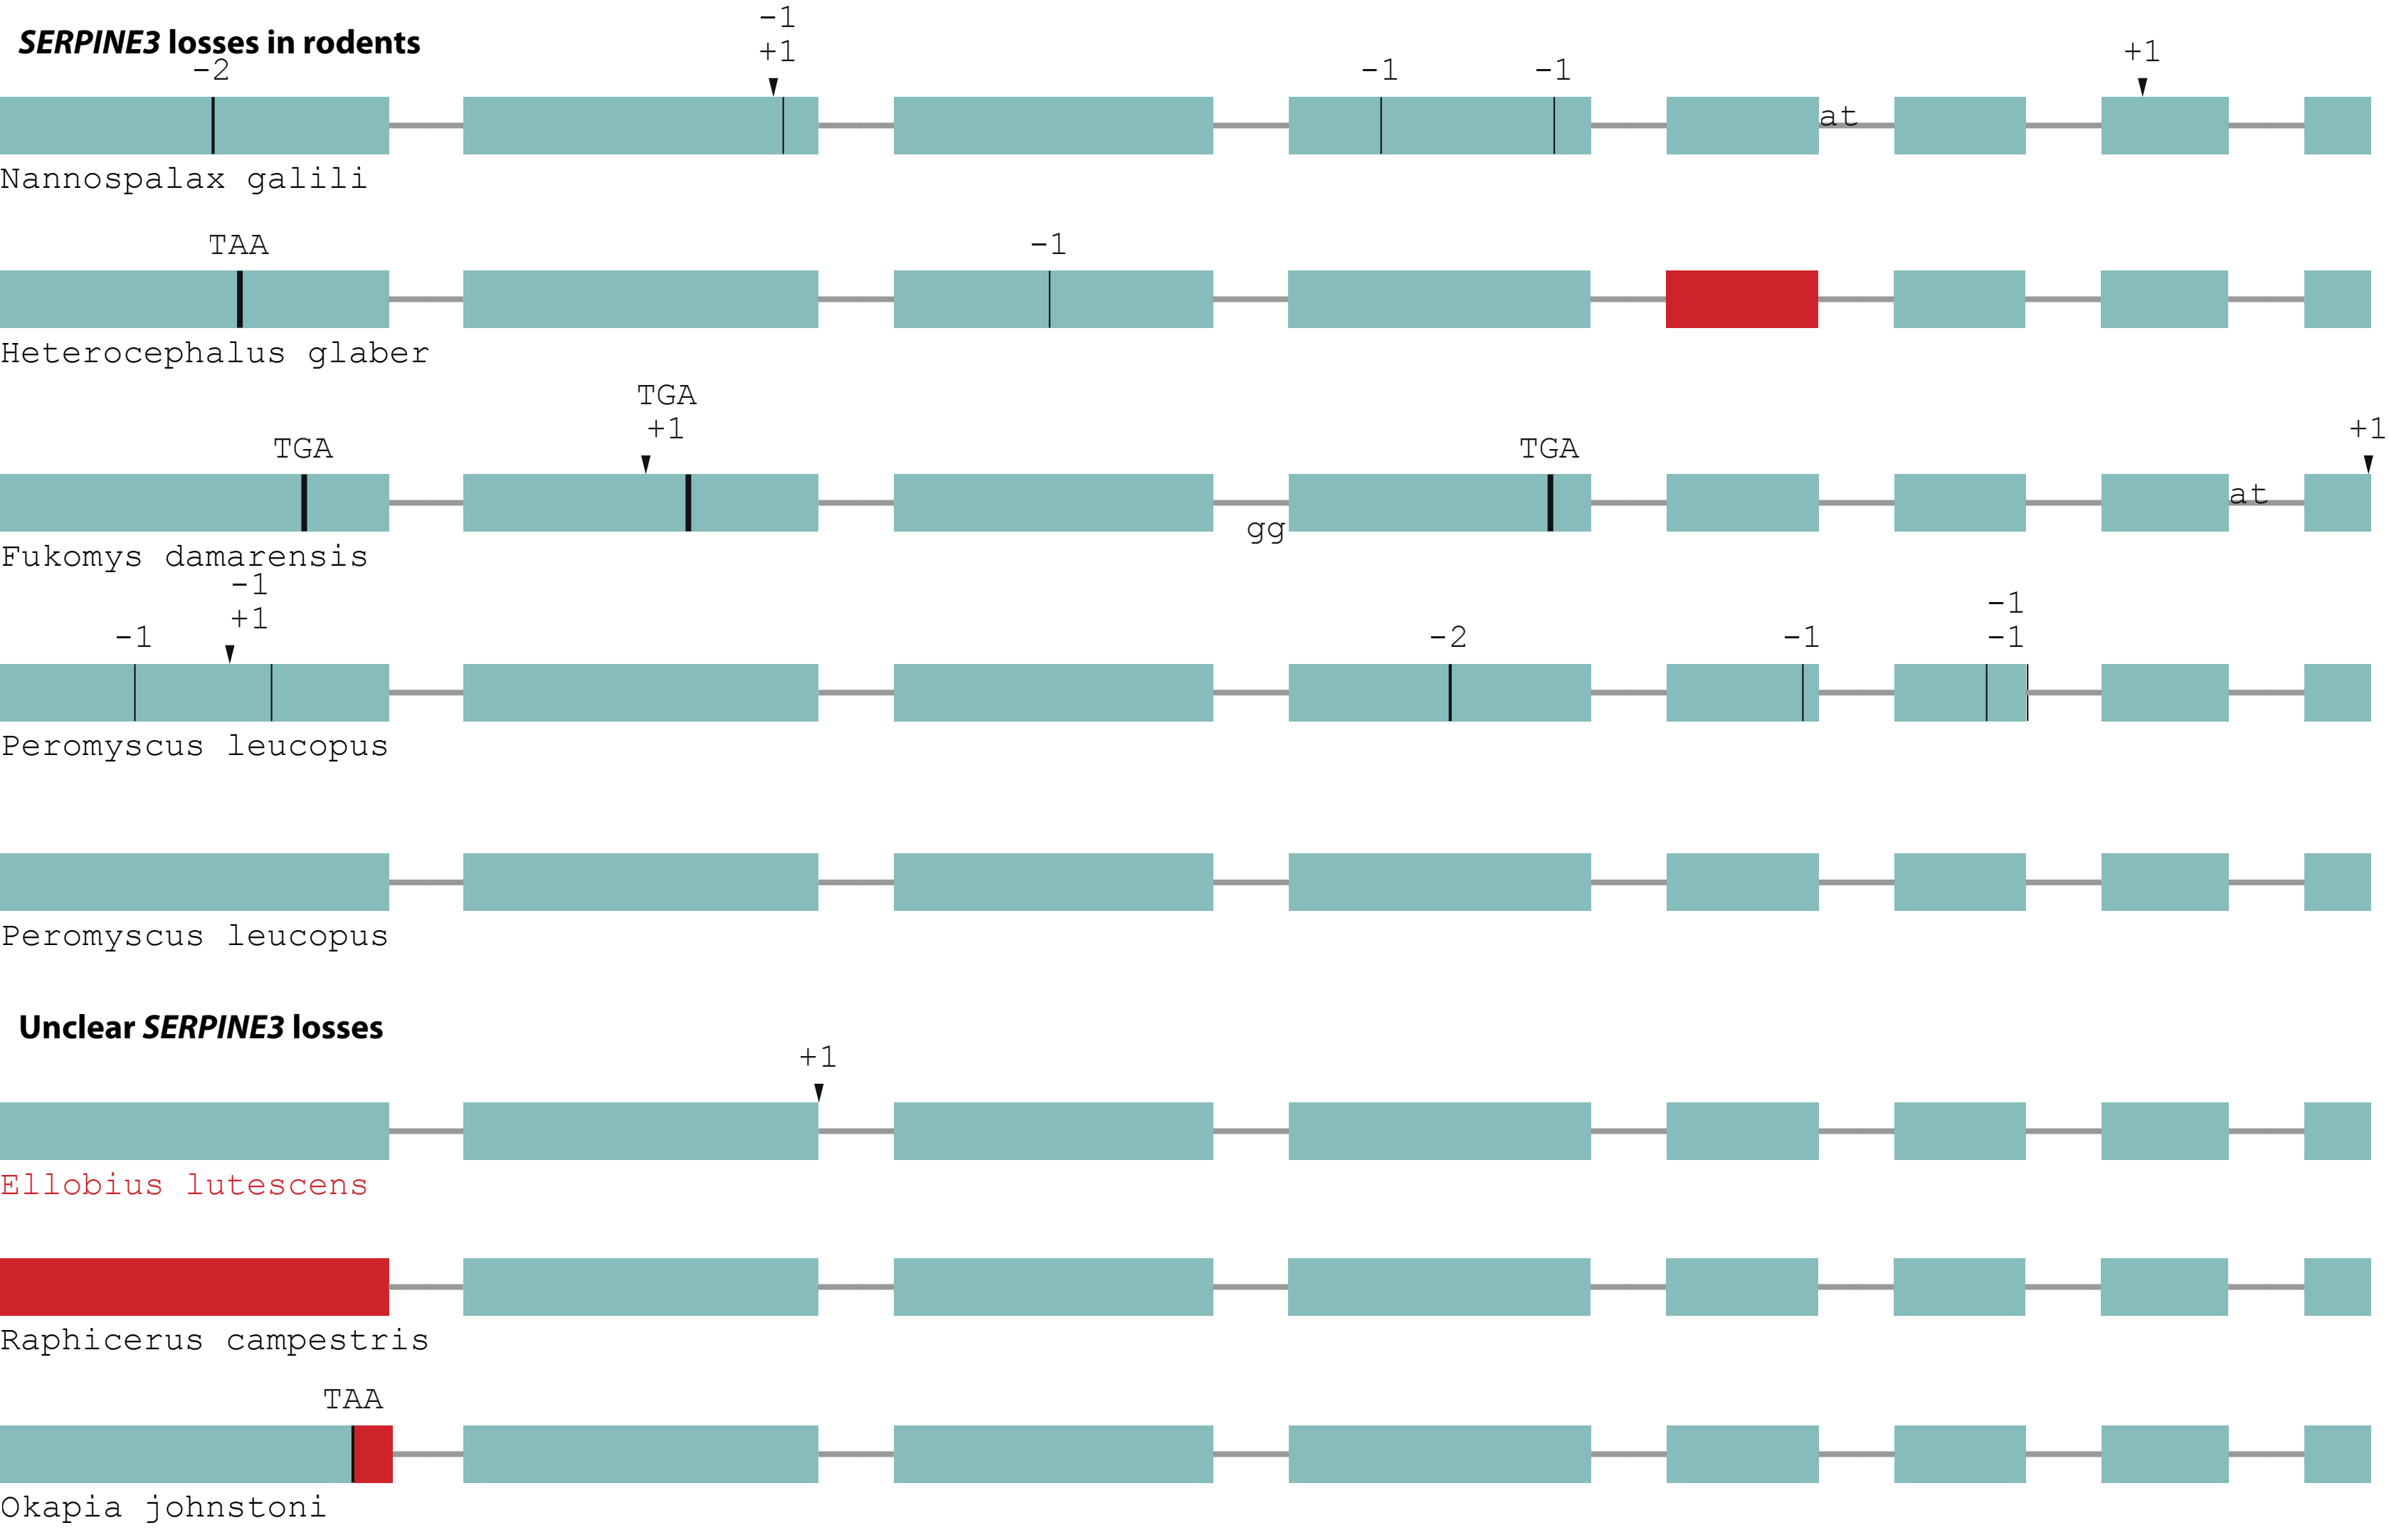

Supplement: supp [file elife_poa_e77999_Figure_2_figure_supplement_8.pdf › elife_poa_e77999_Figure_2_figure_supplement_8.pdf]

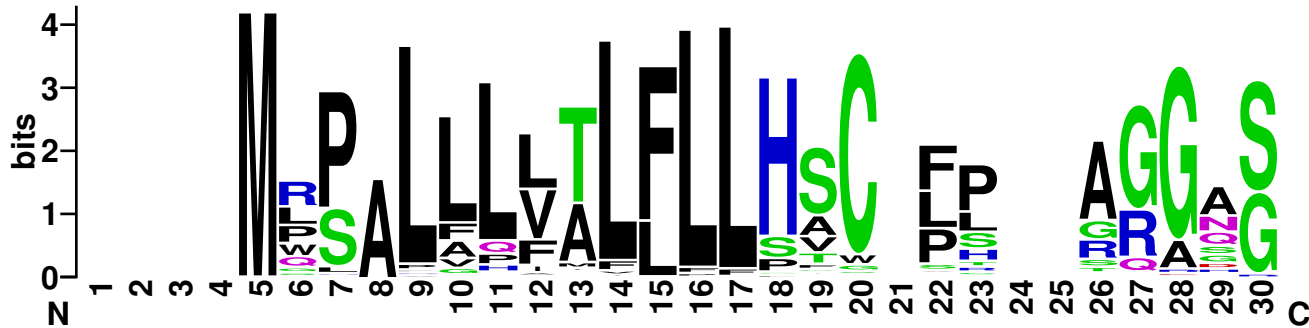

Supplement: supp [file elife_poa_e77999_Figure_2_figure_supplement_9.pdf › elife_poa_e77999_Figure_2_figure_supplement_9.pdf]

**A***injected**uninjected*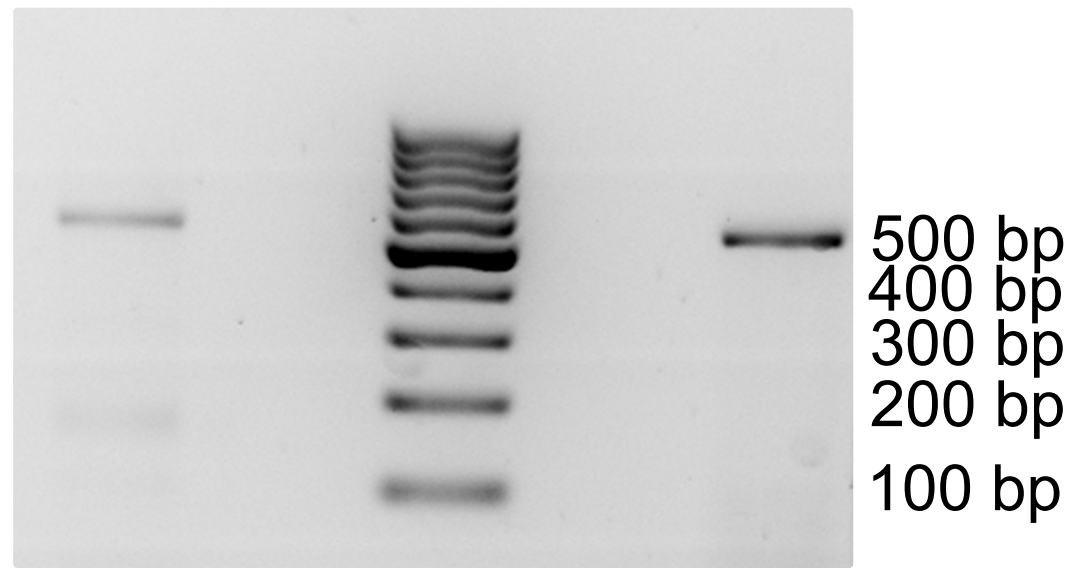**B**

H

WT

M

NC

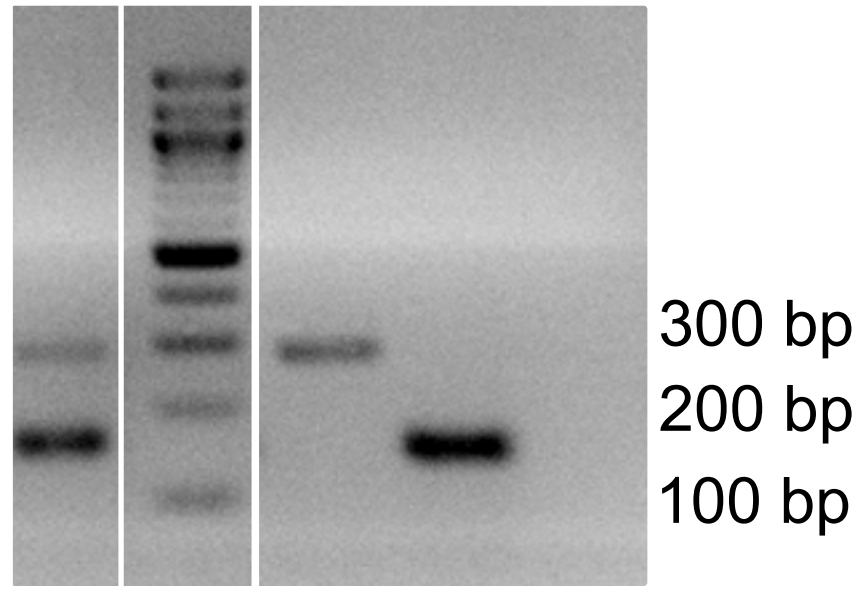**C**

H

M

WT

NC

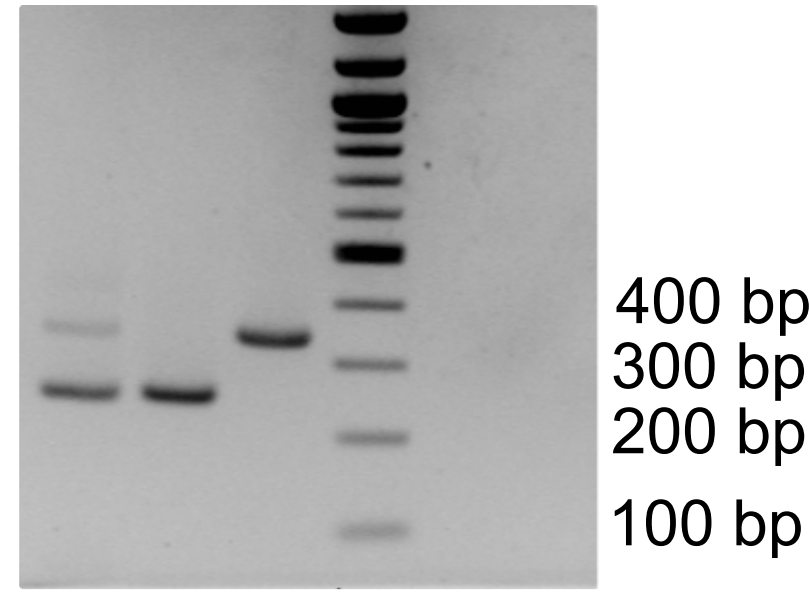

Supplement: supp [file elife_poa_e77999_Figure_4_figure_supplement_2.pdf › elife_poa_e77999_Figure_4_figure_supplement_2.pdf]

p=3.71E-02

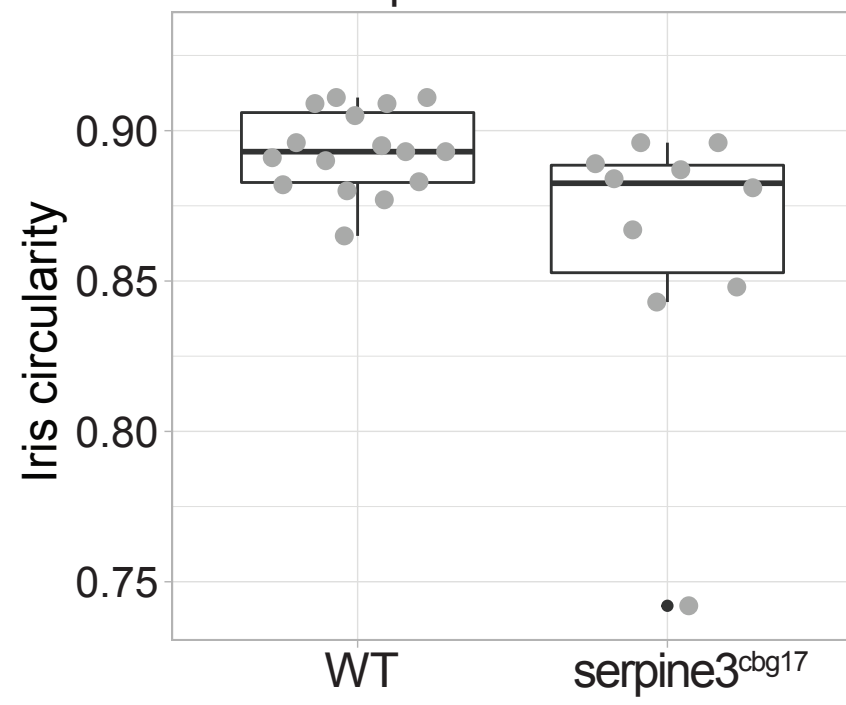

p=1.64E-05

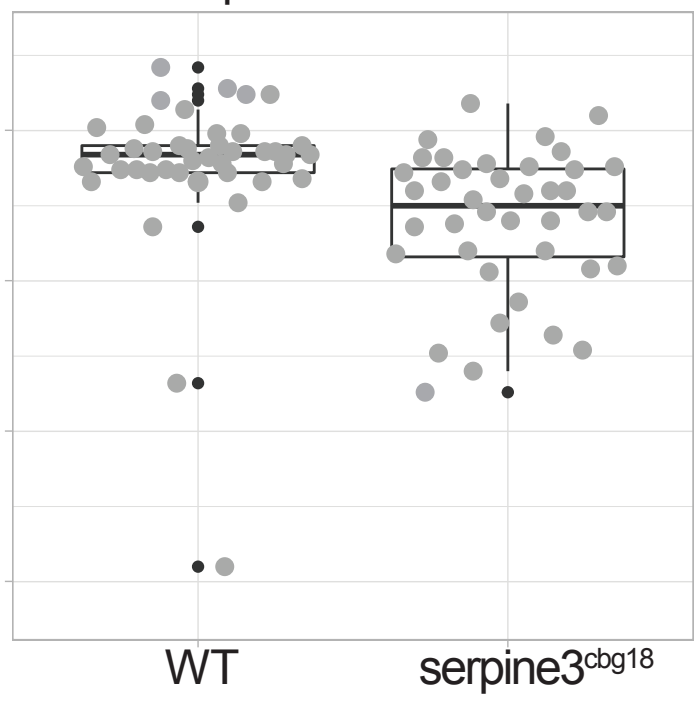

Supplement: supp [file elife_poa_e77999_Figure_4_figure_supplement_3.pdf › elife_poa_e77999_Figure_4_figure_supplement_3.pdf]
